# Supplementary material for: Genomic Markers Associated with Cytomegalovirus DNAemia in Kidney Transplant Recipients
Source: Viruses. 2023 Nov 8;15(11):2227. doi: 10.3390/v15112227 (PMC10674338; doi:10.3390/v15112227)
Supplement: Supplementary file 1 [file viruses-15-02227-s001.zip]

Archive with 15 entries (15 files):
- figureS1A_100523.tif
- figureS1B_100523.tif
- figureS2A_100523.tif
- figureS2B_100523.tif
- figureS2C_100523.tif
- S1_variant_calling_summary_stats.xlsx
- S2_dnaemia.cohortA.assoc.txt
- S3_dnaemia.cohortB.assoc.txt
- S4_dnaemia.meta_assoc.txt
- S5_cnv.results.tsv
- S6_peak_viral_load.cohortA.assoc.txt
- S7_peak_viral_load.cohortB.assoc.txt
- S8_peak_viral_load.meta_assoc.txt
- Supplementry methods S1.pdf
- Supplementry methods S2.pdf
