# Supplementary material for: Genomic Markers Associated with Cytomegalovirus DNAemia in Kidney Transplant Recipients
Source: Viruses. 2023 Nov 8;15(11):2227. doi: 10.3390/v15112227 (PMC10674338; doi:10.3390/v15112227)
Supplement: Supplementary file 1 [file viruses-15-02227-s001.zip › S1_variant_calling_summary_stats.xlsx]

## Sheet: table_S3
Effect
Type	cohort A	cohort B
3_prime_UTR_variant	71227	37500
5_prime_UTR_premature_start_codon_gain_variant	6096	4417
5_prime_UTR_truncation	0	3
5_prime_UTR_variant	42809	29157
bidirectional_gene_fusion	80	18
conservative_inframe_deletion	1499	1324
conservative_inframe_insertion	951	812
disruptive_inframe_deletion	3601	2740
disruptive_inframe_insertion	1385	1150
downstream_gene_variant	204834	119116
exon_loss_variant	3	3
frameshift_variant	4928	5236
gene_fusion	4	1
initiator_codon_variant	25	45
intergenic_region	35456	4648
intragenic_variant	11	4
intron_variant	1461148	666700
missense_variant	183306	181702
non_coding_transcript_exon_variant	65969	43040
non_coding_transcript_variant	75	41
splice_acceptor_variant	2905	1608
splice_donor_variant	1511	1775
splice_region_variant	61144	47626
start_lost	373	371
start_retained_variant	25	36
stop_gained	2328	2661
stop_lost	370	249
stop_retained_variant	161	133
synonymous_variant	173338	153256
transcript_ablation	1	0
upstream_gene_variant	171406	91730
Impact
Type	cohort A	cohort B
HIGH	11925	11489
LOW	231104	196656
MODERATE	190631	187651
MODIFIER	1997927	950437
Loci
Type	cohort A	cohort B
DOWNSTREAM	204834	119116
EXON	432291	387865
GENE	84	19
INTERGENIC	35456	4648
INTRON	1407518	626164
SPLICE_SITE_ACCEPTOR	2774	1540
SPLICE_SITE_DONOR	1366	1637
SPLICE_SITE_REGION	55682	42402
TRANSCRIPT	87	45
UPSTREAM	171406	91730
UTR_3_PRIME	71198	37500
UTR_5_PRIME	48891	33567
Class
Type	cohort A	cohort B
MISSENSE	183851	182243
NONSENSE	2195	2518
SILENT	173492	153383
Type
Type	cohort A	cohort B
DEL	55998	21795
INS	42321	14573
SNP	543087	315915
