# Supplementary material for: Genomic Markers Associated with Cytomegalovirus DNAemia in Kidney Transplant Recipients
Source: Viruses. 2023 Nov 8;15(11):2227. doi: 10.3390/v15112227 (PMC10674338; doi:10.3390/v15112227)
Supplement: Supplementary file 1 [file viruses-15-02227-s001.zip › S2_dnaemia.cohortA.assoc.txt]

chr	rs	ps	n_mis	n_obs	allele1	allele0	af	beta	se	p_wald	p_lrt	p_score
1	1_13649_G_C	13649	0	72	C	G	0.021	0.6880562	0.2957272	0.02297031	0.0188535	0.02427541
1	1_19217_G_C	19217	0	72	C	G	0.042	0.533223	0.208759	0.01288661	0.01021873	0.01443514
1	1_762320_C_T	762320	0	72	T	C	0.035	-0.5552221	0.2288369	0.0179118	0.01448596	0.01937596
1	1_886788_G_A	886788	0	72	A	G	0.812	0.2545941	0.1149175	0.03008099	0.02508588	0.03108937
1	1_894573_G_A	894573	0	72	A	G	0.764	0.2841622	0.1285893	0.03048601	0.02544364	0.03147571
1	1_909242_A_G	909242	0	72	G	A	0.056	-0.437912	0.1837508	0.01996308	0.0162494	0.02136966
1	1_986545_C_G	986545	0	72	G	C	0.028	0.5466662	0.2534897	0.03457901	0.02907374	0.03537207
1	1_1147422_C_T	1147422	0	72	T	C	0.243	-0.2978994	0.0999717	0.003997009	0.002952476	0.005258114
1	1_1159182_G_C	1159182	0	72	C	G	0.097	-0.3707479	0.1504642	0.01627227	0.01308487	0.01777401
1	1_1159197_G_C	1159197	0	72	C	G	0.028	-0.5826384	0.2519366	0.02377583	0.0195545	0.02505088
1	1_1163811_G_GGACA	1163811	0	72	GGACA	G	0.021	-0.6401876	0.2931569	0.03243243	0.02716668	0.03333029
1	1_1273614_TC_CC	1273614	0	72	CC	TC	0.243	0.2788323	0.1151598	0.01814034	0.01468187	0.01959863
1	1_1290606_C_G	1290606	0	72	G	C	0.09	-0.3396634	0.1491151	0.02588308	0.02139474	0.02707471
1	1_1392439_A_G	1392439	0	72	G	A	0.035	0.7615913	0.2569948	0.004189977	0.003103946	0.00547045
1	1_1392440_T_C	1392440	0	72	C	T	0.035	0.7615913	0.2569948	0.004189977	0.003103946	0.00547045
1	1_1431105_A_G	1431105	0	72	G	A	0.035	0.5824608	0.2312938	0.01415197	0.0112853	0.0156886
1	1_1447756_G_C	1447756	0	72	C	G	0.25	0.2841407	0.1269444	0.02847871	0.02367329	0.02955938
1	1_1566067_GA_G	1566067	0	72	G	GA	0.111	0.3146861	0.1426201	0.03073236	0.02566137	0.03171062
1	1_1575929_T_G	1575929	0	72	G	T	0.028	-0.5890581	0.2527454	0.02274614	0.01865866	0.0240594
1	1_1576477_G_A	1576477	0	72	A	G	0.056	-0.425795	0.1894134	0.02782458	0.0230979	0.02893398
1	1_1654004_A_T	1654004	1	71	T	A	0.042	-0.3420725	0.1597893	0.03588071	0.03023352	0.03660866
1	1_1988044_G_C	1988044	0	72	C	G	0.118	-0.3012084	0.1320364	0.02567052	0.02120871	0.02687086
1	1_2449711_G_A	2449711	0	72	A	G	0.021	0.7431478	0.3186459	0.02265834	0.01858238	0.02397478
1	1_2450502_C_T	2450502	0	72	T	C	0.021	0.7431478	0.3186459	0.02265834	0.01858238	0.02397478
1	1_2527901_TG_T	2527901	0	72	T	TG	0.097	0.3049705	0.1357082	0.02787249	0.02314002	0.0289798
1	1_2535440_C_T	2535440	0	72	T	C	0.021	0.7516928	0.3201385	0.02178937	0.01782835	0.02313646
1	1_2702372_G_A	2702372	0	72	A	G	0.056	0.4513871	0.206335	0.03213672	0.02690451	0.03304874
1	1_3389587_C_T	3389587	0	72	T	C	0.021	0.7139378	0.3134964	0.02591585	0.02142343	0.02710614
1	1_3394871_C_T	3394871	0	72	T	C	0.021	0.7139378	0.3134964	0.02591585	0.02142343	0.02710614
1	1_3395229_T_C	3395229	0	72	C	T	0.979	-0.7139378	0.3134964	0.02591585	0.02142343	0.02710614
1	1_3396960_G_T	3396960	0	72	T	G	0.021	0.7139378	0.3134964	0.02591585	0.02142343	0.02710614
1	1_3669172_C_T	3669172	0	72	T	C	0.056	0.4096274	0.18264	0.02817193	0.02340335	0.02926614
1	1_3677818_G_A	3677818	0	72	A	G	0.042	0.535269	0.2131607	0.01441706	0.01150947	0.0159503
1	1_3732782_T_C	3732782	0	72	C	T	0.653	-0.1906027	0.08532834	0.02879169	0.02394887	0.02985846
1	1_3743109_A_G	3743109	0	72	G	A	0.66	-0.2090458	0.08500926	0.0164786	0.01326076	0.01797607
1	1_3743132_T_C	3743132	0	72	C	T	0.597	-0.1800261	0.08094639	0.02947154	0.02454806	0.03050773
1	1_3745787_T_C	3745787	0	72	C	T	0.66	-0.2090458	0.08500926	0.0164786	0.01326076	0.01797607
1	1_3746583_G_T	3746583	0	72	T	G	0.354	0.2118866	0.08499972	0.01511483	0.01210068	0.01663774
1	1_3747580_C_T	3747580	0	72	T	C	0.361	0.2130265	0.08232248	0.0118027	0.009309971	0.01335502
1	1_3753056_TACCAAG_T	3753056	0	72	T	TACCAAG	0.062	0.4145195	0.192526	0.03486427	0.0293277	0.03564316
1	1_3753063_G_T	3753063	0	72	T	G	0.069	0.4206543	0.1795607	0.02207921	0.01807967	0.02341624
1	1_3753136_A_T	3753136	0	72	T	A	0.34	0.2090458	0.08500926	0.0164786	0.01326076	0.01797607
1	1_3756120_A_G	3756120	0	72	G	A	0.368	0.2197756	0.0863319	0.01317752	0.01046341	0.01472398
1	1_3761479_C_T	3761479	0	72	T	C	0.354	0.2118866	0.08499972	0.01511483	0.01210068	0.01663774
1	1_3788978_GA_G	3788978	0	72	G	GA	0.146	-0.2835097	0.1291219	0.03153067	0.02636766	0.03247149
1	1_5922697_C_T	5922697	0	72	T	C	0.16	-0.3678525	0.1114577	0.001539912	0.00107272	0.00240577
1	1_5923788_T_G	5923788	0	72	G	T	0.583	-0.2173356	0.07754013	0.006593368	0.005021109	0.008041699
1	1_5925371_G_A	5925371	0	72	A	G	0.431	-0.1757947	0.08134086	0.03420378	0.02873989	0.03501541
1	1_5933530_A_G	5933530	0	72	G	A	0.167	-0.3450594	0.1048554	0.001585711	0.001106625	0.002462963
1	1_5934500_T_C	5934500	0	72	C	T	0.292	-0.2430189	0.09926988	0.01694847	0.01366177	0.01843572
1	1_5937246_C_T	5937246	0	72	T	C	0.021	0.7304618	0.316418	0.02401632	0.01976406	0.02528219
1	1_5937391_C_T	5937391	0	72	T	C	0.778	0.2998454	0.1042013	0.005350406	0.004023132	0.006726662
1	1_5939517_CTTCT_C	5939517	0	72	C	CTTCT	0.021	0.7304618	0.316418	0.02401632	0.01976406	0.02528219
1	1_5939544_T_G	5939544	0	72	G	T	0.778	0.2998454	0.1042013	0.005350406	0.004023132	0.006726662
1	1_5948677_G_A	5948677	0	72	A	G	0.778	0.2998454	0.1042013	0.005350406	0.004023132	0.006726662
1	1_5964991_T_C	5964991	0	72	C	T	0.778	0.2849613	0.1101758	0.01184272	0.009343442	0.01339502
1	1_6038583_G_C	6038583	0	72	C	G	0.792	0.289324	0.1107063	0.01102609	0.008661855	0.01257695
1	1_6267311_C_T	6267311	0	72	T	C	0.035	0.5787908	0.2307545	0.01452377	0.01159978	0.01605556
1	1_6267531_C_T	6267531	0	72	T	C	0.056	0.4665658	0.166993	0.006759026	0.005155021	0.008215076
1	1_6269021_C_T	6269021	0	72	T	C	0.069	0.4292437	0.1554551	0.007397364	0.005672826	0.008879632
1	1_6269340_A_G	6269340	0	72	G	A	0.083	0.3569601	0.1415406	0.01401727	0.01117148	0.01555551
1	1_6269768_T_G	6269768	0	72	G	T	0.069	0.4292437	0.1554551	0.007397364	0.005672826	0.008879632
1	1_6271125_A_G	6271125	0	72	G	A	0.083	0.437537	0.1372533	0.002167156	0.001541814	0.003170413
1	1_6272078_G_A	6272078	0	72	A	G	0.083	0.437537	0.1372533	0.002167156	0.001541814	0.003170413
1	1_6272136_GA_G	6272136	0	72	G	GA	0.069	0.4292437	0.1554551	0.007397364	0.005672826	0.008879632
1	1_6272137_A_G	6272137	0	72	G	A	0.403	-0.1742999	0.08104965	0.03507111	0.02951191	0.03583969
1	1_6272813_C_T	6272813	0	72	T	C	0.083	0.437537	0.1372533	0.002167156	0.001541814	0.003170413
1	1_6418857_G_A	6418857	0	72	A	G	0.056	0.3681613	0.1629928	0.02710937	0.02246967	0.02824961
1	1_6505848_G_C	6505848	0	72	C	G	0.035	-0.5467132	0.2264517	0.01846403	0.01495959	0.01991376
1	1_6505851_A_C	6505851	0	72	C	A	0.035	-0.5077194	0.2288582	0.02986358	0.02489395	0.03088192
1	1_6525335_G_A	6525335	0	72	A	G	0.069	-0.4181243	0.1513038	0.007351388	0.00563544	0.008831945
1	1_6528589_C_T	6528589	0	72	T	C	0.056	0.4928273	0.1838046	0.009196341	0.007145868	0.01072723
1	1_6531589_C_T	6531589	0	72	T	C	0.062	0.405581	0.1572686	0.01207953	0.009541619	0.0136315
1	1_6531966_C_T	6531966	0	72	T	C	0.049	0.5013359	0.198909	0.0140731	0.01121865	0.01561069
1	1_6535048_A_G	6535048	0	72	G	A	0.146	-0.2471437	0.1063428	0.02311958	0.01898329	0.02441919
1	1_6535242_G_A	6535242	0	72	A	G	0.028	0.6418513	0.2784366	0.02421344	0.01993592	0.02547172
1	1_6640661_C_T	6640661	0	72	T	C	0.028	0.6564186	0.2810115	0.02245192	0.01840311	0.02377576
1	1_7838113_A_C	7838113	0	72	C	A	0.181	0.265957	0.1125032	0.02094212	0.01709485	0.02231769
1	1_7879627_C_T	7879627	0	72	T	C	0.174	0.2481344	0.1145836	0.03385814	0.02843254	0.03468678
1	1_7907984_A_G	7907984	0	72	G	A	0.167	0.285828	0.1144691	0.01495227	0.01196281	0.01647776
1	1_8000025_G_A	8000025	0	72	A	G	0.021	-0.746725	0.3246175	0.02450401	0.02018939	0.02575099
1	1_8384582_A_C	8384582	0	72	C	A	0.09	0.3588345	0.1491115	0.01882934	0.01527337	0.02026908
1	1_8390054_C_A	8390054	0	72	A	C	0.222	-0.3479477	0.09416789	0.000440487	0.0002838993	0.0009090684
1	1_8390246_T_C	8390246	0	72	C	T	0.354	-0.1845945	0.08334841	0.03013255	0.02513141	0.03113856
1	1_8390888_G_A	8390888	0	72	A	G	0.382	-0.2218428	0.08390851	0.0101677	0.007948642	0.01171234
1	1_8404123_G_A	8404123	0	72	A	G	0.042	-0.5768815	0.2166694	0.0096726	0.00753887	0.01121119
1	1_8420672_G_A	8420672	0	72	A	G	0.021	-0.746725	0.3246175	0.02450401	0.02018939	0.02575099
1	1_8421966_C_G	8421966	0	72	G	C	0.028	-0.626555	0.2670804	0.02190199	0.01792598	0.02324519
1	1_8525791_C_T	8525791	0	72	T	C	0.021	-0.746725	0.3246175	0.02450401	0.02018939	0.02575099
1	1_8568663_G_A	8568663	0	72	A	G	0.021	-0.746725	0.3246175	0.02450401	0.02018939	0.02575099
1	1_9416852_A_G	9416852	0	72	G	A	0.201	-0.2463212	0.1054484	0.02245047	0.01840185	0.02377437
1	1_9658492_C_G	9658492	0	72	G	C	0.049	-0.5322534	0.1912611	0.006968968	0.005325012	0.008434242
1	1_9794305_C_T	9794305	0	72	T	C	0.139	-0.3032952	0.1263683	0.0191347	0.01553592	0.02056582
1	1_9795719_C_T	9795719	0	72	T	C	0.153	-0.2951353	0.1254131	0.02150592	0.01758277	0.0228627
1	1_9811541_A_G	9811541	0	72	G	A	0.16	-0.3185134	0.1212038	0.01060972	0.008315482	0.01215821
1	1_10397080_A_G	10397080	0	72	G	A	0.028	0.5466395	0.2534795	0.03458055	0.02907511	0.03537354
1	1_11018723_A_G	11018723	0	72	G	A	0.208	0.2261618	0.1024838	0.0307073	0.02563923	0.03168673
1	1_11106666_T_C	11106666	0	72	C	T	0.042	0.6185419	0.2073273	0.00395607	0.002920397	0.005212919
1	1_11140620_AACACAC_A	11140620	0	72	A	AACACAC	0.271	-0.1749495	0.08026487	0.03274974	0.02744814	0.03363233
1	1_11293577_G_A	11293577	0	72	A	G	0.028	0.6147706	0.2544775	0.01839172	0.01489753	0.01984339
1	1_12024380_T_G	12024380	0	72	G	T	0.118	-0.313746	0.1378015	0.02595004	0.02145336	0.02713892
1	1_12186058_A_G	12186058	0	72	G	A	0.021	-0.6299647	0.2928046	0.03499297	0.02944231	0.03576545
1	1_12186356_C_T	12186356	0	72	T	C	0.021	-0.6299647	0.2928046	0.03499297	0.02944231	0.03576545
1	1_12248942_A_G	12248942	0	72	G	A	0.201	-0.3014365	0.09153144	0.001573892	0.001097869	0.002448228
1	1_12248965_A_G	12248965	0	72	G	A	0.188	-0.3192831	0.09479679	0.00124963	0.0008593346	0.002036782
1	1_12249020_C_T	12249020	0	72	T	C	0.188	-0.3192831	0.09479679	0.00124963	0.0008593346	0.002036782
1	1_12250888_T_C	12250888	0	72	C	T	0.069	0.6205803	0.1597076	0.0002338576	0.000144873	0.0005678066
1	1_12251191_T_A	12251191	0	72	A	T	0.097	-0.4192325	0.1457892	0.005379915	0.004046675	0.006758207
1	1_12251765_T_G	12251765	0	72	G	T	0.174	-0.2979997	0.1005726	0.004195027	0.003107916	0.005475991
1	1_12252892_C_T	12252892	0	72	T	C	0.167	-0.2855307	0.1021554	0.006737746	0.005137808	0.008192827
1	1_12252955_T_G	12252955	0	72	G	T	0.167	-0.3145797	0.09644811	0.001733405	0.001216365	0.00264577
1	1_12254201_G_A	12254201	0	72	A	G	0.104	-0.3540259	0.1431471	0.01589637	0.01276478	0.01740551
1	1_12261972_A_G	12261972	0	72	G	A	0.111	-0.3583461	0.1107809	0.001881108	0.001326686	0.002826318
1	1_12418700_T_C	12418700	0	72	C	T	0.931	0.4532096	0.1719299	0.01038316	0.00812734	0.01192986
1	1_12633052_C_G	12633052	0	72	G	C	0.125	-0.2541001	0.1172647	0.03374976	0.0283362	0.03458372
1	1_12639197_GCCA_G	12639197	0	72	G	GCCA	0.201	-0.250947	0.1048366	0.01944428	0.01580236	0.02086642
1	1_12898610_C_T	12898610	0	72	T	C	0.028	0.5445441	0.2510665	0.03358886	0.02819321	0.03443069
1	1_12919505_G_T	12919505	0	72	T	G	0.368	0.3864464	0.1348248	0.00552303	0.004160968	0.006910952
1	1_12919506_A_T	12919506	0	72	T	A	0.361	0.4107674	0.1296429	0.002296626	0.001639771	0.003324045
1	1_12920440_G_A	12920440	0	72	A	G	0.104	-0.2809844	0.1223722	0.02475541	0.02040884	0.0259925
1	1_12921576_C_T	12921576	0	72	T	C	0.083	-0.3409424	0.1429785	0.01989395	0.01618979	0.02130264
1	1_12939440_C_G	12939440	0	72	G	C	0.104	-0.2809844	0.1223722	0.02475541	0.02040884	0.0259925
1	1_12939815_G_A	12939815	0	72	A	G	0.097	-0.3052813	0.133693	0.02553363	0.02108895	0.02673954
1	1_12954490_A_G	12954490	0	72	G	A	0.132	0.2388858	0.1068733	0.02869034	0.02385961	0.02976162
1	1_13013363_T_C	13013363	0	72	C	T	0.049	0.3670748	0.1593189	0.02428299	0.01999657	0.02553858
1	1_13013424_C_T	13013424	0	72	T	C	0.076	0.3037763	0.1358706	0.02865235	0.02382616	0.02972532
1	1_13353799_T_A	13353799	0	72	A	T	0.16	-0.3029905	0.1159086	0.01100827	0.00864702	0.01255906
1	1_13353802_C_G	13353802	0	72	G	C	0.16	-0.3029905	0.1159086	0.01100827	0.00864702	0.01255906
1	1_13353963_G_A	13353963	0	72	A	G	0.139	-0.4016988	0.1250573	0.002014204	0.001426553	0.002987275
1	1_15428358_T_C	15428358	0	72	C	T	0.931	0.3508465	0.1510045	0.02315437	0.01901355	0.0244527
1	1_15497601_A_C	15497601	0	72	C	A	0.035	0.4950286	0.2280514	0.03344954	0.02806943	0.03429818
1	1_15545581_G_A	15545581	0	72	A	G	0.132	0.3180618	0.107613	0.004285349	0.003178964	0.005574987
1	1_15546077_G_A	15546077	0	72	A	G	0.285	0.2312782	0.08445235	0.007870998	0.006058769	0.009369417
1	1_15599025_G_A	15599025	0	72	A	G	0.139	0.3341444	0.1297896	0.01222004	0.009659312	0.01377166
1	1_15599069_G_A	15599069	0	72	A	G	0.132	0.2786915	0.121578	0.02498976	0.02061352	0.02621756
1	1_15834360_A_G	15834360	0	72	G	A	0.111	-0.3995466	0.1345265	0.004111596	0.003042369	0.005384337
1	1_15905501_G_A	15905501	0	72	A	G	0.111	-0.3995466	0.1345265	0.004111596	0.003042369	0.005384337
1	1_16271260_G_A	16271260	0	72	A	G	0.312	0.1936992	0.08283783	0.02232029	0.01828884	0.02364882
1	1_16357035_G_A	16357035	0	72	A	G	0.035	-0.5689187	0.2447279	0.02308142	0.0189501	0.02438244
1	1_16360086_A_C	16360086	0	72	C	A	0.069	0.3753984	0.1705655	0.03114146	0.02602318	0.0321006
1	1_16362005_GCCCT_G	16362005	0	72	G	GCCCT	0.215	-0.3269422	0.1014497	0.001950824	0.001378944	0.002910822
1	1_16377566_G_A	16377566	0	72	A	G	0.028	0.6949735	0.2877102	0.01840482	0.01490877	0.01985614
1	1_16383914_C_T	16383914	0	72	T	C	0.299	-0.2617545	0.1179461	0.02980773	0.02484466	0.03082862
1	1_16385915_C_A	16385915	0	72	A	C	0.028	0.6127648	0.2520092	0.01767576	0.01428376	0.01914583
1	1_16386447_G_C	16386447	0	72	C	G	0.979	0.640552	0.2931974	0.0323603	0.02710272	0.03326163
1	1_16389026_T_C	16389026	0	72	C	T	0.243	0.1967381	0.07789152	0.01387847	0.01105427	0.0154183
1	1_16528469_GCC_G	16528469	0	72	G	GCC	0.729	0.2185707	0.08967081	0.01741054	0.01405677	0.01888706
1	1_16528472_TACCCTAGGGACC_T	16528472	0	72	T	TACCCTAGGGACC	0.729	0.2185707	0.08967081	0.01741054	0.01405677	0.01888706
1	1_16533022_C_T	16533022	0	72	T	C	0.729	0.2185707	0.08967081	0.01741054	0.01405677	0.01888706
1	1_16535804_G_C	16535804	0	72	C	G	0.729	0.1986122	0.08729293	0.02604847	0.02153955	0.02723329
1	1_16542937_T_G	16542937	0	72	G	T	0.292	-0.3008136	0.09614957	0.002586336	0.001860158	0.003663718
1	1_16894472_A_G	16894472	0	72	G	A	0.035	-0.5241837	0.2286214	0.0249583	0.02058603	0.02618735
1	1_16894476_G_C	16894476	0	72	C	G	0.035	-0.5241837	0.2286214	0.0249583	0.02058603	0.02618735
1	1_16895634_T_G	16895634	0	72	G	T	0.597	-0.3481069	0.1455908	0.01957645	0.01591618	0.02099469
1	1_16903912_T_A	16903912	0	72	A	T	0.694	-0.2683377	0.1133447	0.02076289	0.0169399	0.02214428
1	1_16911937_C_G	16911937	0	72	G	C	0.062	0.4486673	0.172458	0.01137729	0.008954628	0.01292928
1	1_16916603_C_A	16916603	0	72	A	C	0.674	-0.2611408	0.1010477	0.01190816	0.009398182	0.0134604
1	1_16973114_AGCCATGGTT_A	16973114	0	72	A	AGCCATGGTT	0.028	0.6143445	0.254343	0.01841018	0.01491337	0.01986136
1	1_16973327_G_A	16973327	0	72	A	G	0.062	-0.3988399	0.1794672	0.02958886	0.02465154	0.03061972
1	1_16973606_G_T	16973606	0	72	T	G	0.354	-0.2852303	0.1296438	0.03120044	0.02607537	0.03215682
1	1_16974021_G_A	16974021	0	72	A	G	0.424	-0.38434	0.1604772	0.01938162	0.0157484	0.02080559
1	1_16975093_C_T	16975093	0	72	T	C	0.153	-0.2829227	0.1267118	0.02885749	0.02400683	0.02992132
1	1_16976193_C_T	16976193	0	72	T	C	0.472	-0.4231439	0.1664028	0.0132747	0.01054522	0.01482038
1	1_17034041_T_C	17034041	0	72	C	T	0.785	-0.3027568	0.1266438	0.01959499	0.01593215	0.02101268
1	1_17084304_C_T	17084304	0	72	T	C	0.201	-0.3213067	0.1179666	0.008196612	0.006324908	0.009704657
1	1_17084815_G_A	17084815	0	72	A	G	0.562	0.4480956	0.1713104	0.01096021	0.008607003	0.01251078
1	1_17359676_C_A	17359676	0	72	A	C	0.965	0.5049904	0.2267147	0.02923189	0.02433675	0.03027891
1	1_17380497_G_T	17380497	0	72	T	G	0.965	0.5049904	0.2267147	0.02923189	0.02433675	0.03027891
1	1_17405809_G_A	17405809	0	72	A	G	0.549	0.2039637	0.09461842	0.03465344	0.02914	0.03544282
1	1_17405916_C_T	17405916	0	72	T	C	0.549	0.2039637	0.09461842	0.03465344	0.02914	0.03544282
1	1_17531582_G_A	17531582	0	72	A	G	0.132	-0.2926129	0.1221959	0.01939923	0.01576357	0.02082269
1	1_17555316_C_G	17555316	0	72	G	C	0.368	0.1923879	0.08380219	0.02478007	0.02043037	0.02601619
1	1_17666139_G_A	17666139	0	72	A	G	0.062	0.4252933	0.1737641	0.01697132	0.01368129	0.01845805
1	1_17668976_G_C	17668976	0	72	C	G	0.062	0.4252933	0.1737641	0.01697132	0.01368129	0.01845805
1	1_18554345_T_C	18554345	0	72	C	T	0.215	0.2444213	0.09172412	0.009614377	0.007490763	0.01115213
1	1_18554356_C_T	18554356	0	72	T	C	0.215	0.2444213	0.09172412	0.009614377	0.007490763	0.01115213
1	1_18691614_T_C	18691614	0	72	C	T	0.139	-0.2762646	0.1075671	0.01242093	0.009827726	0.01397187
1	1_18691665_G_T	18691665	0	72	T	G	0.125	-0.2559772	0.1177029	0.033129	0.02778476	0.03399324
1	1_18703544_G_A	18703544	0	72	A	G	0.132	-0.2794568	0.1149714	0.01771402	0.01431652	0.01918314
1	1_18807938_C_A	18807938	0	72	A	C	0.125	0.2851221	0.1298457	0.03151731	0.02635582	0.03245876
1	1_18808711_G_C	18808711	0	72	C	G	0.097	0.3392832	0.1374881	0.01611902	0.01295432	0.01762384
1	1_18810484_G_A	18810484	0	72	A	G	0.097	0.3392832	0.1374881	0.01611902	0.01295432	0.01762384
1	1_18810486_A_C	18810486	0	72	C	A	0.111	0.3191831	0.1321952	0.01845367	0.0149507	0.01990368
1	1_19202770_T_C	19202770	0	72	C	T	0.951	0.5257041	0.2299926	0.02539147	0.02096462	0.02660314
1	1_19212881_G_A	19212881	0	72	A	G	0.042	-0.4987494	0.218536	0.02560952	0.02115534	0.02681235
1	1_19638309_A_G	19638309	0	72	G	A	0.778	-0.2312901	0.1048078	0.03070756	0.02563945	0.03168698
1	1_19934900_G_A	19934900	0	72	A	G	0.16	-0.2856502	0.1271361	0.02790244	0.02316634	0.02900844
1	1_20009471_G_A	20009471	0	72	A	G	0.035	-0.6288177	0.2450043	0.01247784	0.009875461	0.01402854
1	1_20009837_G_C	20009837	0	72	C	G	0.035	-0.6288177	0.2450043	0.01247784	0.009875461	0.01402854
1	1_20411234_T_A	20411234	0	72	A	T	0.285	0.2578572	0.1029364	0.01464585	0.01170314	0.01617591
1	1_20411332_C_T	20411332	0	72	T	C	0.285	0.2578572	0.1029364	0.01464585	0.01170314	0.01617591
1	1_20416407_G_A	20416407	0	72	A	G	0.021	-0.6358522	0.2961079	0.03533198	0.02974432	0.03608752
1	1_20469854_G_A	20469854	0	72	A	G	0.021	-0.6445802	0.2936792	0.0315928	0.02642267	0.03253069
1	1_20517965_T_C	20517965	0	72	C	T	0.042	0.5077362	0.209601	0.01808863	0.01463752	0.01954826
1	1_20668864_TCTC_T	20668864	0	72	T	TCTC	0.09	0.3698389	0.1501933	0.01633924	0.01314194	0.01783961
1	1_20997072_A_G	20997072	0	72	G	A	0.069	-0.389084	0.1559221	0.01501464	0.01201569	0.01653915
1	1_21016842_A_G	21016842	0	72	G	A	0.076	0.5969213	0.1566125	0.0002998606	0.0001886753	0.0006819021
1	1_21752681_C_T	21752681	0	72	T	C	0.097	0.3424319	0.1470144	0.02282461	0.01872685	0.02413503
1	1_21752752_G_A	21752752	0	72	A	G	0.097	0.3424319	0.1470144	0.02282461	0.01872685	0.02413503
1	1_21752762_T_A	21752762	0	72	A	T	0.097	0.3424319	0.1470144	0.02282461	0.01872685	0.02413503
1	1_21752862_C_T	21752862	0	72	T	C	0.028	-0.5894553	0.2579501	0.02542801	0.02099658	0.02663821
1	1_21755055_C_A	21755055	0	72	A	C	0.778	-0.3252776	0.1218226	0.009477123	0.007377423	0.01101278
1	1_21755142_C_T	21755142	0	72	T	C	0.097	0.3424319	0.1470144	0.02282461	0.01872685	0.02413503
1	1_21755453_G_A	21755453	0	72	A	G	0.778	-0.3252776	0.1218226	0.009477123	0.007377423	0.01101278
1	1_21755539_C_A	21755539	0	72	A	C	0.771	-0.2897035	0.1204155	0.01885877	0.01529866	0.02029769
1	1_21755756_G_C	21755756	0	72	C	G	0.778	-0.3252776	0.1218226	0.009477123	0.007377423	0.01101278
1	1_21755867_A_G	21755867	0	72	G	A	0.778	-0.3252776	0.1218226	0.009477123	0.007377423	0.01101278
1	1_21755906_G_A	21755906	0	72	A	G	0.778	-0.3252776	0.1218226	0.009477123	0.007377423	0.01101278
1	1_21756008_G_T	21756008	0	72	T	G	0.778	-0.3252776	0.1218226	0.009477123	0.007377423	0.01101278
1	1_21756069_G_A	21756069	0	72	A	G	0.778	-0.3252776	0.1218226	0.009477123	0.007377423	0.01101278
1	1_21806525_A_T	21806525	0	72	T	A	0.062	0.5909445	0.1690126	0.0008352587	0.0005602137	0.001484262
1	1_21808127_G_A	21808127	0	72	A	G	0.028	-0.5894553	0.2579501	0.02542801	0.02099658	0.02663821
1	1_21896767_C_T	21896767	0	72	T	C	0.104	0.342083	0.1477286	0.02360262	0.01940365	0.02488422
1	1_21900420_A_G	21900420	0	72	G	A	0.806	-0.2644849	0.1126576	0.02180741	0.01784399	0.02315387
1	1_21935358_C_T	21935358	0	72	T	C	0.028	-0.5852285	0.2568001	0.02581608	0.02133609	0.02701047
1	1_22033228_G_A	22033228	0	72	A	G	0.153	0.2743676	0.1089356	0.01413913	0.01127445	0.01567592
1	1_22142586_C_G	22142586	0	72	G	C	0.021	-0.6594822	0.3031925	0.03310141	0.02776027	0.03396699
1	1_22148817_G_A	22148817	0	72	A	G	0.056	0.543562	0.1829851	0.004105621	0.003037678	0.005377765
1	1_22150778_G_C	22150778	0	72	C	G	0.062	0.4352467	0.1765537	0.01622203	0.01304206	0.01772478
1	1_22154387_G_A	22154387	0	72	A	G	0.062	0.4352467	0.1765537	0.01622203	0.01304206	0.01772478
1	1_22157545_G_A	22157545	0	72	A	G	0.062	0.4352467	0.1765537	0.01622203	0.01304206	0.01772478
1	1_22158743_C_CATGA	22158743	0	72	CATGA	C	0.062	0.4352467	0.1765537	0.01622203	0.01304206	0.01772478
1	1_22970514_G_A	22970514	0	72	A	G	0.035	-0.6277939	0.2447991	0.01254446	0.009931358	0.01409486
1	1_22971019_T_C	22971019	0	72	C	T	0.049	-0.4586761	0.2082688	0.03103628	0.02593014	0.03200036
1	1_24406432_G_A	24406432	0	72	A	G	0.035	-0.6884295	0.2564201	0.009109527	0.007074358	0.01063881
1	1_24407903_C_T	24407903	0	72	T	C	0.035	-0.6884295	0.2564201	0.009109527	0.007074358	0.01063881
1	1_24680915_C_T	24680915	0	72	T	C	0.243	0.219261	0.09234896	0.02041289	0.01663754	0.02180548
1	1_24706113_G_A	24706113	0	72	A	G	0.361	0.1980592	0.08783245	0.02735878	0.02268864	0.02848833
1	1_24706269_A_G	24706269	0	72	G	A	0.361	0.1980592	0.08783245	0.02735878	0.02268864	0.02848833
1	1_24706410_T_C	24706410	0	72	C	T	0.361	0.1980592	0.08783245	0.02735878	0.02268864	0.02848833
1	1_24706438_A_AG	24706438	0	72	AG	A	0.361	0.1980592	0.08783245	0.02735878	0.02268864	0.02848833
1	1_24706461_A_G	24706461	0	72	G	A	0.361	0.1980592	0.08783245	0.02735878	0.02268864	0.02848833
1	1_25585583_CT_C	25585583	0	72	C	CT	0.035	-0.5951291	0.2244575	0.009964454	0.007780276	0.01150684
1	1_25880282_A_G	25880282	0	72	G	A	0.035	0.5038003	0.228445	0.03081425	0.02573378	0.0317887
1	1_25883780_G_T	25883780	0	72	T	G	0.035	-0.568243	0.2445722	0.02315442	0.0190136	0.02445275
1	1_25891540_C_T	25891540	0	72	T	C	0.028	-0.6495041	0.2722811	0.01985186	0.01615351	0.02126184
1	1_26073242_G_A	26073242	0	72	A	G	0.028	0.6148703	0.2545086	0.01838725	0.01489369	0.01983904
1	1_26508997_C_T	26508997	0	72	T	C	0.049	0.6079183	0.249994	0.01766617	0.01427555	0.01913647
1	1_26511139_G_A	26511139	0	72	A	G	0.09	-0.3526168	0.1539116	0.02506611	0.02068023	0.02629087
1	1_26514111_CTT_CT	26514111	0	72	CT	CTT	0.125	-0.3441695	0.1282845	0.009156627	0.00711315	0.01068679
1	1_26515956_C_A	26515956	0	72	A	C	0.09	-0.3336748	0.1509385	0.03042617	0.02539076	0.03141864
1	1_26596080_G_A	26596080	0	72	A	G	0.194	0.3495277	0.1143492	0.003197421	0.002329795	0.00436481
1	1_26597435_G_A	26597435	0	72	A	G	0.958	0.5090999	0.2109966	0.01853053	0.01501668	0.01997847
1	1_26597781_C_T	26597781	0	72	T	C	0.194	0.2593483	0.1068988	0.01791944	0.0144925	0.0193834
1	1_26601570_A_G	26601570	0	72	G	A	0.194	0.3495277	0.1143492	0.003197421	0.002329795	0.00436481
1	1_26601774_GT_GTT	26601774	0	72	GTT	GT	0.181	-0.2660661	0.1182773	0.02772123	0.02300706	0.02883512
1	1_26606174_A_C	26606174	0	72	C	A	0.194	0.3495277	0.1143492	0.003197421	0.002329795	0.00436481
1	1_26607726_T_G	26607726	0	72	G	T	0.194	0.3495277	0.1143492	0.003197421	0.002329795	0.00436481
1	1_26608769_C_T	26608769	0	72	T	C	0.118	-0.3528801	0.129134	0.007998842	0.006163185	0.009501178
1	1_26608811_TCCAGGACAGGGACTGGGGCCGGGACCGGGACCGGGACTGGGGCCGGGACCGGGACCGGGACTGGGGCCGGGACCGGGA_T	26608811	0	72	T	TCCAGGACAGGGACTGGGGCCGGGACCGGGACCGGGACTGGGGCCGGGACCGGGACCGGGACTGGGGCCGGGACCGGGA	0.438	0.4253874	0.1826694	0.02285352	0.01875197	0.02416288
1	1_26608848_CTGGGGCCGGG_C	26608848	0	72	C	CTGGGGCCGGG	0.188	0.3187553	0.1166072	0.007978863	0.006146861	0.009480599
1	1_26608859_ACCGGGACC_A	26608859	0	72	A	ACCGGGACC	0.188	0.3187553	0.1166072	0.007978863	0.006146861	0.009480599
1	1_26608865_ACC_A	26608865	0	72	A	ACC	0.118	-0.3528801	0.129134	0.007998842	0.006163185	0.009501178
1	1_26608868_GGGACTGGGGCCGGGACCGGGACCGGGAC_G	26608868	0	72	G	GGGACTGGGGCCGGGACCGGGACCGGGAC	0.118	-0.3528801	0.129134	0.007998842	0.006163185	0.009501178
1	1_26608877_GCCGGGA_G	26608877	0	72	G	GCCGGGA	0.188	0.3187553	0.1166072	0.007978863	0.006146861	0.009480599
1	1_26609093_A_T	26609093	0	72	T	A	0.118	-0.3528801	0.129134	0.007998842	0.006163185	0.009501178
1	1_26609307_G_T	26609307	0	72	T	G	0.958	0.5090999	0.2109966	0.01853053	0.01501668	0.01997847
1	1_26610891_A_C	26610891	0	72	C	A	0.958	0.5090999	0.2109966	0.01853053	0.01501668	0.01997847
1	1_26612042_A_G	26612042	0	72	G	A	0.958	0.5090999	0.2109966	0.01853053	0.01501668	0.01997847
1	1_26612460_G_A	26612460	0	72	A	G	0.201	0.3116454	0.1152713	0.008657511	0.006702691	0.01017729
1	1_26644399_C_T	26644399	0	72	T	C	0.194	0.2914201	0.117186	0.015349	0.01229946	0.01686802
1	1_26648838_G_T	26648838	0	72	T	G	0.201	0.2539428	0.1172812	0.03388071	0.0284526	0.03470824
1	1_26872640_G_A	26872640	0	72	A	G	0.056	0.4383946	0.182655	0.01913299	0.01553445	0.02056415
1	1_27278553_G_A	27278553	0	72	A	G	0.111	-0.4000515	0.1278004	0.00257344	0.001850315	0.003648709
1	1_27689763_C_T	27689763	0	72	T	C	0.25	0.2345044	0.1066174	0.03124602	0.0261157	0.03220025
1	1_27944000_T_A	27944000	0	72	A	T	0.903	-0.332182	0.124756	0.009668537	0.007535513	0.01120707
1	1_28136807_G_T	28136807	0	72	T	G	0.028	0.6949735	0.2877102	0.01840482	0.01490877	0.01985614
1	1_28136885_A_G	28136885	0	72	G	A	0.028	0.6949735	0.2877102	0.01840482	0.01490877	0.01985614
1	1_28146306_T_C	28146306	0	72	C	T	0.028	0.6949735	0.2877102	0.01840482	0.01490877	0.01985614
1	1_28159447_A_AT	28159447	0	72	AT	A	0.035	-0.5971042	0.2243384	0.009695308	0.007557638	0.01123422
1	1_28173659_C_T	28173659	0	72	T	C	0.028	0.6949735	0.2877102	0.01840482	0.01490877	0.01985614
1	1_28240992_C_T	28240992	0	72	T	C	0.083	0.4132333	0.1568205	0.0104093	0.008149029	0.01195621
1	1_28290231_C_G	28290231	0	72	G	C	0.938	0.3944994	0.1795128	0.03138605	0.02623963	0.0323337
1	1_28832586_T_G	28832586	0	72	G	T	0.132	0.3484675	0.1524719	0.02540942	0.02098032	0.02662037
1	1_28832687_A_G	28832687	0	72	G	A	0.132	0.3484675	0.1524719	0.02540942	0.02098032	0.02662037
1	1_28832697_G_A	28832697	0	72	A	G	0.132	0.3484675	0.1524719	0.02540942	0.02098032	0.02662037
1	1_28833834_T_A	28833834	0	72	A	T	0.132	0.3484675	0.1524719	0.02540942	0.02098032	0.02662037
1	1_28835041_G_A	28835041	0	72	A	G	0.139	0.3068742	0.1355986	0.02682571	0.02222077	0.02797801
1	1_28835270_CAT_C	28835270	0	72	C	CAT	0.132	0.3484675	0.1524719	0.02540942	0.02098032	0.02662037
1	1_28995254_T_TGGC	28995254	0	72	TGGC	T	0.049	-0.5338059	0.1970582	0.008534096	0.006601412	0.01005094
1	1_29016716_T_G	29016716	0	72	G	T	0.271	0.2689788	0.0868022	0.002825297	0.002043083	0.003940133
1	1_29475341_C_T	29475341	0	72	T	C	0.806	0.2396565	0.1073722	0.02891207	0.02405491	0.02997345
1	1_29475394_C_G	29475394	0	72	G	C	0.806	0.2396565	0.1073722	0.02891207	0.02405491	0.02997345
1	1_29863096_ACTTTTT_A	29863096	0	72	A	ACTTTTT	0.222	0.1590973	0.07209512	0.03070996	0.02564158	0.03168927
1	1_31415040_A_T	31415040	0	72	T	A	0.285	-0.2754217	0.09965211	0.007344166	0.005629568	0.008824452
1	1_31415041_TATATATATATATATATA_TTA	31415041	0	72	TTA	TATATATATATATATATA	0.111	0.2875213	0.1254182	0.02497663	0.02060204	0.02620495
1	1_32118159_AC_A	32118159	0	72	A	AC	0.056	-0.5287412	0.179902	0.004493339	0.003342914	0.005802089
1	1_32122424_TAA_TA	32122424	0	72	TA	TAA	0.16	0.3443052	0.1171853	0.004505239	0.003352308	0.005815047
1	1_32378540_G_T	32378540	0	72	T	G	0.069	0.3938793	0.1669999	0.02122705	0.01734134	0.0225932
1	1_32669277_C_A	32669277	0	72	A	C	0.035	-0.5824323	0.247797	0.02165918	0.01771553	0.02301074
1	1_32692168_ATT_A	32692168	0	72	A	ATT	0.049	0.5719731	0.2021899	0.006133081	0.004650102	0.007557785
1	1_33127730_T_C	33127730	0	72	C	T	0.972	0.6728359	0.2949211	0.02566068	0.0212001	0.02686142
1	1_33133968_T_C	33133968	0	72	C	T	0.972	0.6728359	0.2949211	0.02566068	0.0212001	0.02686142
1	1_33138516_A_C	33138516	0	72	C	A	0.972	0.6728359	0.2949211	0.02566068	0.0212001	0.02686142
1	1_33138605_T_C	33138605	0	72	C	T	0.875	0.3984028	0.1524554	0.01103177	0.008666586	0.01258266
1	1_33147143_C_T	33147143	0	72	T	C	0.972	0.6728359	0.2949211	0.02566068	0.0212001	0.02686142
1	1_33476353_C_T	33476353	0	72	T	C	0.375	0.3254509	0.1389902	0.02214194	0.01813408	0.02347676
1	1_33799658_TA_T	33799658	0	72	T	TA	0.028	0.5452522	0.2510567	0.03335975	0.02798967	0.03421276
1	1_34285342_G_A	34285342	0	72	A	G	0.528	0.1921797	0.08412909	0.02547822	0.02104049	0.02668638
1	1_34285381_C_T	34285381	0	72	T	C	0.528	0.1921797	0.08412909	0.02547822	0.02104049	0.02668638
1	1_35135315_C_T	35135315	0	72	T	C	0.347	0.1884618	0.08774195	0.03528705	0.02970428	0.03604483
1	1_35455735_A_G	35455735	0	72	G	A	0.035	0.5838572	0.2267783	0.01221797	0.009657576	0.01376959
1	1_36282399_CAAAAAAAAAAAAA_CAAAAAAAAAAAA	36282399	0	72	CAAAAAAAAAAAA	CAAAAAAAAAAAAA	0.111	0.3168282	0.141776	0.02872589	0.02389092	0.02979559
1	1_36282427_G_A	36282427	0	72	A	G	0.167	0.3082251	0.1204375	0.0127204	0.01007907	0.01426991
1	1_36298019_CT_C	36298019	0	72	C	CT	0.222	0.3162522	0.1150109	0.00763344	0.005865016	0.009124089
1	1_36384028_G_T	36384028	0	72	T	G	0.035	0.5352434	0.2274855	0.02152923	0.01760296	0.02288521
1	1_36642361_C_T	36642361	0	72	T	C	0.021	-0.746725	0.3246175	0.02450401	0.02018939	0.02575099
1	1_36785853_C_A	36785853	0	72	A	C	0.028	0.7463227	0.2821217	0.01012625	0.007914285	0.01167045
1	1_36785855_C_T	36785855	0	72	T	C	0.028	0.7463227	0.2821217	0.01012625	0.007914285	0.01167045
1	1_37959450_T_C	37959450	0	72	C	T	0.722	0.2089386	0.09461566	0.03059916	0.02554363	0.03158361
1	1_37967649_C_T	37967649	0	72	T	C	0.035	0.5839515	0.2268034	0.01221377	0.009654058	0.01376541
1	1_37967707_ATTGACAGAGAAGATACATG_A	37967707	0	72	A	ATTGACAGAGAAGATACATG	0.722	0.2272377	0.0967742	0.02178404	0.01782373	0.02313131
1	1_37975312_T_C	37975312	0	72	C	T	0.722	0.2272377	0.0967742	0.02178404	0.01782373	0.02313131
1	1_38046920_G_T	38046920	0	72	T	G	0.736	0.2033507	0.09303376	0.03227918	0.02703079	0.03318439
1	1_38049552_C_G	38049552	0	72	G	C	0.729	0.2326743	0.09397098	0.01578021	0.01266595	0.01729154
1	1_38052867_CA_CAA	38052867	0	72	CAA	CA	0.431	-0.3824063	0.1377615	0.007104988	0.005435312	0.008575917
1	1_38188574_G_A	38188574	0	72	A	G	0.035	-0.6165227	0.2261423	0.008139856	0.006278472	0.009646305
1	1_38226964_C_T	38226964	0	72	T	C	0.146	-0.3153545	0.1168605	0.008776264	0.006800226	0.01029872
1	1_38339659_C_T	38339659	0	72	T	C	0.028	0.6148831	0.2545126	0.01838667	0.01489319	0.01983848
1	1_38397341_G_A	38397341	0	72	A	G	0.438	0.1958282	0.08270636	0.02074708	0.01692624	0.02212899
1	1_38397369_C_T	38397369	0	72	T	C	0.438	0.1958282	0.08270636	0.02074708	0.01692624	0.02212899
1	1_38411445_G_A	38411445	0	72	A	G	0.243	0.2339704	0.09495191	0.01626953	0.01308254	0.01777132
1	1_38444749_T_C	38444749	0	72	C	T	0.451	-0.2070317	0.07801722	0.009904433	0.007730595	0.01144609
1	1_39976930_C_T	39976930	0	72	T	C	0.09	-0.3851449	0.1613053	0.01973986	0.01605697	0.02115322
1	1_40209650_CT_CTT	40209650	0	72	CTT	CT	0.049	-0.560112	0.1912064	0.004619425	0.003442527	0.005939201
1	1_40363054_G_C	40363054	0	72	C	G	0.889	0.286972	0.1208021	0.02034734	0.01658094	0.021742
1	1_40367625_G_T	40367625	0	72	T	G	0.021	-0.6321885	0.2946987	0.03551119	0.02990404	0.03625774
1	1_40545964_T_G	40545964	0	72	G	T	0.743	0.195436	0.09071679	0.0347586	0.02923361	0.03554275
1	1_40557033_A_G	40557033	0	72	G	A	0.056	0.4475727	0.1854091	0.01847736	0.01497103	0.01992673
1	1_40559686_G_A	40559686	0	72	A	G	0.111	0.2992965	0.1373388	0.03278032	0.02747528	0.03366144
1	1_40559831_G_A	40559831	0	72	A	G	0.062	-0.4193507	0.1738191	0.0185429	0.01502731	0.01999051
1	1_41284366_G_C	41284366	0	72	C	G	0.653	0.2299116	0.08947551	0.01238032	0.009793666	0.01393141
1	1_41284406_A_G	41284406	0	72	G	A	0.653	0.2299116	0.08947551	0.01238032	0.009793666	0.01393141
1	1_41284509_C_G	41284509	1	71	G	C	0.634	0.2118012	0.08326981	0.01325174	0.01052589	0.01479761
1	1_41284520_A_G	41284520	0	72	G	A	0.639	0.2386216	0.08450211	0.006219831	0.004719902	0.007649244
1	1_41285087_T_C	41285087	0	72	C	T	0.646	0.2132477	0.08849574	0.01867773	0.0151431	0.02012166
1	1_43738340_A_C	43738340	0	72	C	A	0.535	-0.2208238	0.0830098	0.009732046	0.007588006	0.01127146
1	1_43908787_A_G	43908787	0	72	G	A	0.021	-0.6421797	0.2933851	0.03204398	0.02682232	0.03296043
1	1_44169065_AT_A	44169065	0	72	A	AT	0.062	-0.4135059	0.1785109	0.02355625	0.01936328	0.0248396
1	1_44679675_C_T	44679675	0	72	T	C	0.069	0.4528383	0.1684791	0.009035306	0.007013254	0.01056316
1	1_44686140_G_A	44686140	0	72	A	G	0.069	0.4528383	0.1684791	0.009035306	0.007013254	0.01056316
1	1_44749881_G_A	44749881	0	72	A	G	0.069	0.4528383	0.1684791	0.009035306	0.007013254	0.01056316
1	1_44785571_G_A	44785571	0	72	A	G	0.069	0.4528383	0.1684791	0.009035306	0.007013254	0.01056316
1	1_44818635_C_G	44818635	0	72	G	C	0.069	0.4528383	0.1684791	0.009035306	0.007013254	0.01056316
1	1_45800156_C_T	45800156	0	72	T	C	0.062	0.4353779	0.1765863	0.01621008	0.01303189	0.01771308
1	1_47139246_C_A	47139246	0	72	A	C	0.028	-0.5702607	0.2515059	0.02654932	0.02197839	0.02771327
1	1_48869409_C_T	48869409	0	72	T	C	0.035	0.5352685	0.2274932	0.02152758	0.01760153	0.02288362
1	1_49056770_C_CCA	49056770	0	72	CCA	C	0.132	-0.2584364	0.1074038	0.01884222	0.01528444	0.0202816
1	1_50885622_AC_A	50885622	0	72	A	AC	0.139	0.2558679	0.114438	0.02864628	0.02382082	0.02971953
1	1_51866413_AGT_A	51866413	0	72	A	AGT	0.028	0.5462947	0.253347	0.03459943	0.02909192	0.03539149
1	1_51873967_G_A	51873967	0	72	A	G	0.042	0.5334262	0.2088111	0.01287528	0.01020921	0.01442388
1	1_52179818_GT_G	52179818	0	72	G	GT	0.118	-0.3528388	0.1343427	0.01065242	0.008350967	0.01220121
1	1_52275155_C_T	52275155	0	72	T	C	0.062	0.4136317	0.1897206	0.0327062	0.02740951	0.03359089
1	1_52819978_C_G	52819978	0	72	G	C	0.021	-0.6407057	0.2932146	0.03233002	0.02707587	0.0332328
1	1_52937900_TA_TAA	52937900	0	72	TAA	TA	0.035	0.535317	0.2275081	0.02152439	0.01759877	0.02288054
1	1_53574187_A_G	53574187	0	72	G	A	0.035	0.4624455	0.2138791	0.03412579	0.02867052	0.03494127
1	1_53692702_A_C	53692702	0	72	C	A	0.028	0.6127161	0.252008	0.01768389	0.01429072	0.01915376
1	1_53738419_C_T	53738419	0	72	T	C	0.188	0.3007899	0.09163875	0.001627329	0.001137487	0.002514721
1	1_53746473_T_C	53746473	0	72	C	T	0.243	0.3034765	0.08727529	0.0008876829	0.0005976296	0.00155635
1	1_53793294_CG_C	53793294	0	72	C	CG	0.035	-0.4016682	0.185061	0.03346723	0.02808515	0.034315
1	1_54375570_C_A	54375570	0	72	A	C	0.472	-0.17768	0.08194745	0.03364463	0.02824277	0.03448373
1	1_54870485_G_GA	54870485	0	72	GA	G	0.028	0.5453606	0.2510576	0.03332646	0.02796011	0.03418109
1	1_55088849_TA_T	55088849	0	72	T	TA	0.278	-0.2653697	0.1158995	0.0251507	0.02075415	0.02637207
1	1_55193872_T_G	55193872	0	72	G	T	0.021	0.7304618	0.316418	0.02401632	0.01976406	0.02528219
1	1_55518093_G_A	55518093	0	72	A	G	0.035	-0.6659393	0.2267608	0.004523011	0.003366341	0.005834392
1	1_55518287_G_A	55518287	0	72	A	G	0.035	-0.6659393	0.2267608	0.004523011	0.003366341	0.005834392
1	1_55525399_C_T	55525399	0	72	T	C	0.028	-0.5893274	0.2527811	0.02270486	0.0186228	0.02401962
1	1_55541335_ACAACACCACCAC_AAACACCACCAC	55541335	0	72	AAACACCACCAC	ACAACACCACCAC	0.083	-0.3849053	0.1535214	0.01456424	0.01163404	0.01609546
1	1_55541337_AACACCACCACC_A	55541337	0	72	A	AACACCACCACC	0.083	-0.3849053	0.1535214	0.01456424	0.01163404	0.01609546
1	1_55680320_TTC_T	55680320	0	72	T	TTC	0.035	-0.6139768	0.2419922	0.01347379	0.01071293	0.01501773
1	1_57258111_G_C	57258111	0	72	C	G	0.028	0.6408494	0.2782586	0.02433982	0.02004614	0.0255932
1	1_59042001_G_A	59042001	0	72	A	G	0.035	0.5350291	0.2274196	0.02154315	0.01761501	0.02289866
1	1_59127086_G_A	59127086	0	72	A	G	0.236	0.3589524	0.1042759	0.0009909349	0.0006717143	0.001696254
1	1_59127193_C_T	59127193	0	72	T	C	0.229	0.3453555	0.106488	0.001833722	0.001291233	0.002768625
1	1_59137783_A_G	59137783	0	72	G	A	0.639	-0.215993	0.09826106	0.0313456	0.02620383	0.03229515
1	1_59142713_T_C	59142713	0	72	C	T	0.639	-0.215993	0.09826106	0.0313456	0.02620383	0.03229515
1	1_60019853_C_T	60019853	0	72	T	C	0.069	-0.479391	0.1625403	0.004362688	0.003239873	0.005659571
1	1_62673365_T_C	62673365	0	72	C	T	0.049	-0.5304808	0.191139	0.0071146	0.005443111	0.008585919
1	1_65099978_G_A	65099978	0	72	A	G	0.958	-0.4103853	0.1727761	0.02036319	0.01659463	0.02175735
1	1_65301238_A_G	65301238	0	72	G	A	0.049	0.4366919	0.198032	0.03082798	0.02574592	0.03180178
1	1_65886398_T_C	65886398	0	72	C	T	0.5	0.1790254	0.07894593	0.02652934	0.02196088	0.02769413
1	1_66067109_T_C	66067109	0	72	C	T	0.229	-0.224576	0.09933001	0.02696884	0.02234634	0.02811507
1	1_66831322_T_G	66831322	0	72	G	T	0.104	0.2969677	0.1221623	0.01770219	0.0143064	0.01917161
1	1_67098664_G_A	67098664	0	72	A	G	0.111	-0.3360852	0.1296851	0.01168367	0.009210471	0.01323601
1	1_67101778_AAC_A	67101778	0	72	A	AAC	0.076	0.4137817	0.1449829	0.005716947	0.004316114	0.007117288
1	1_67142852_G_A	67142852	0	72	A	G	0.069	-0.4084868	0.1695864	0.01872349	0.01518241	0.02016616
1	1_67155862_TCTC_T	67155862	0	72	T	TCTC	0.215	-0.2563466	0.09489908	0.008712305	0.006747685	0.01023333
1	1_67160884_A_G	67160884	0	72	G	A	0.257	-0.2041687	0.08576093	0.02008886	0.01635789	0.02149158
1	1_67160981_C_T	67160981	0	72	T	C	0.236	-0.2068297	0.089968	0.02458785	0.02026256	0.02583154
1	1_67184921_A_G	67184921	0	72	G	A	0.062	0.4920161	0.1526793	0.001951757	0.001379644	0.002911949
1	1_67236097_A_T	67236097	0	72	T	A	0.125	-0.3376608	0.1219846	0.007259226	0.005560537	0.008736272
1	1_67242087_G_A	67242087	0	72	A	G	0.125	-0.3376608	0.1219846	0.007259226	0.005560537	0.008736272
1	1_67242225_CAT_C	67242225	0	72	C	CAT	0.125	-0.3376608	0.1219846	0.007259226	0.005560537	0.008736272
1	1_67242241_TGG_T	67242241	0	72	T	TGG	0.125	-0.3376608	0.1219846	0.007259226	0.005560537	0.008736272
1	1_67303303_A_G	67303303	0	72	G	A	0.403	0.234721	0.0836335	0.006526675	0.004967254	0.007971785
1	1_67313793_G_A	67313793	0	72	A	G	0.132	-0.3885414	0.1233083	0.00241972	0.001733216	0.003469026
1	1_67519435_C_A	67519435	0	72	A	C	0.236	0.2677221	0.1118322	0.01943133	0.0157912	0.02085385
1	1_67558739_C_T	67558739	0	72	T	C	0.903	0.463508	0.1396941	0.001458676	0.001012733	0.002303684
1	1_67560897_A_G	67560897	0	72	G	A	0.91	0.4391674	0.1456239	0.003602442	0.002644158	0.004820225
1	1_67560956_C_T	67560956	0	72	T	C	0.917	0.4155974	0.1528274	0.00829359	0.006404295	0.009804283
1	1_67579386_A_G	67579386	0	72	G	A	0.91	0.3399714	0.1490672	0.02570761	0.02124117	0.02690644
1	1_70655012_C_A	70655012	0	72	A	C	0.083	0.3419808	0.1559688	0.03175974	0.0265705	0.03268971
1	1_71437471_T_TA	71437471	0	72	TA	T	0.028	-0.5895952	0.2528167	0.02266397	0.01858727	0.02398021
1	1_71477841_A_T	71477841	0	72	T	A	0.167	0.2735222	0.1170221	0.02237219	0.01833389	0.02369888
1	1_71512643_C_A	71512643	0	72	A	C	0.16	0.25813	0.1200804	0.03514426	0.02957707	0.03590919
1	1_71536574_G_C	71536574	0	72	C	G	0.097	0.3677871	0.1371965	0.009209339	0.007156578	0.01074047
1	1_71537980_C_T	71537980	0	72	T	C	0.146	0.2730997	0.1243489	0.03148853	0.02633034	0.03243134
1	1_71538191_A_G	71538191	0	72	G	A	0.16	0.25813	0.1200804	0.03514426	0.02957707	0.03590919
1	1_71544069_G_A	71544069	0	72	A	G	0.16	0.25813	0.1200804	0.03514426	0.02957707	0.03590919
1	1_71544079_CAAG_C	71544079	0	72	C	CAAG	0.222	-0.2561113	0.09639264	0.0098174	0.007658588	0.01135796
1	1_74507711_T_G	74507711	0	72	G	T	0.896	-0.3969775	0.1637109	0.01797582	0.01454082	0.01943836
1	1_74669973_T_G	74669973	0	72	G	T	0.896	-0.3969775	0.1637109	0.01797582	0.01454082	0.01943836
1	1_75172771_G_A	75172771	0	72	A	G	0.035	-0.5076426	0.2288304	0.02986825	0.02489807	0.03088638
1	1_75626420_A_T	75626420	0	72	T	A	0.958	0.4873846	0.2148774	0.02649707	0.02193259	0.02766322
1	1_75766186_G_A	75766186	0	72	A	G	0.5	-0.1933174	0.08430578	0.02494321	0.02057285	0.02617286
1	1_76143505_T_C	76143505	0	72	C	T	0.972	0.6489079	0.253494	0.01269899	0.01006109	0.01424862
1	1_76194306_A_G	76194306	0	72	G	A	0.965	0.5964968	0.2254972	0.01013006	0.007917448	0.01167431
1	1_76234886_A_G	76234886	0	72	G	A	0.965	0.5964968	0.2254972	0.01013006	0.007917448	0.01167431
1	1_76257892_A_T	76257892	0	72	T	A	0.972	0.6489079	0.253494	0.01269899	0.01006109	0.01424862
1	1_76333172_T_C	76333172	0	72	C	T	0.028	-0.6489079	0.253494	0.01269899	0.01006109	0.01424862
1	1_76333352_G_A	76333352	0	72	A	G	0.035	-0.5633012	0.226197	0.0152116	0.0121828	0.01673292
1	1_76608777_C_T	76608777	0	72	T	C	0.556	-0.2197045	0.09797314	0.02819335	0.02342219	0.02928662
1	1_78195665_T_C	78195665	0	72	C	T	0.049	0.4953003	0.2005171	0.01602085	0.01287073	0.01752759
1	1_78414329_G_A	78414329	0	72	A	G	0.132	-0.3287112	0.129255	0.01326668	0.01053847	0.01481243
1	1_78414330_G_A	78414330	0	72	A	G	0.208	-0.301244	0.1201489	0.0145613	0.01163155	0.01609256
1	1_78432658_AT_A	78432658	0	72	A	AT	0.076	-0.3723809	0.1590918	0.02218977	0.01817558	0.02352292
1	1_79383300_CA_C	79383300	0	72	C	CA	0.486	0.1824583	0.0806556	0.02688532	0.02227306	0.02803509
1	1_79411888_T_C	79411888	0	72	C	T	0.493	0.1973045	0.08074217	0.01714035	0.01382573	0.01862322
1	1_85392324_C_T	85392324	0	72	T	C	0.299	-0.2200506	0.09077385	0.01800796	0.01456837	0.01946967
1	1_85417819_A_C	85417819	0	72	C	A	0.062	-0.5489258	0.2398358	0.02520573	0.02080224	0.02642488
1	1_85418341_G_C	85418341	0	72	C	G	0.062	-0.5489258	0.2398358	0.02520573	0.02080224	0.02642488
1	1_85742155_G_A	85742155	0	72	A	G	0.028	-0.588222	0.2526354	0.02287513	0.01877076	0.02418371
1	1_85816224_G_A	85816224	0	72	A	G	0.028	-0.588222	0.2526354	0.02287513	0.01877076	0.02418371
1	1_86119898_A_G	86119898	0	72	G	A	0.347	0.2045001	0.08883572	0.02440352	0.02010171	0.02565442
1	1_86171692_TA_T	86171692	0	72	T	TA	0.424	-0.4018879	0.1608857	0.01491443	0.01193072	0.0164405
1	1_86891073_G_A	86891073	0	72	A	G	0.035	0.5354749	0.2275562	0.02151392	0.0175897	0.02287043
1	1_86961157_C_T	86961157	0	72	T	C	0.09	0.3239512	0.1387328	0.02249864	0.01844368	0.02382082
1	1_87329311_C_T	87329311	0	72	T	C	0.035	0.4790347	0.2086688	0.02478419	0.02043397	0.02602014
1	1_87369225_T_C	87369225	0	72	C	T	0.035	0.4790347	0.2086688	0.02478419	0.02043397	0.02602014
1	1_87530308_C_A	87530308	0	72	A	C	0.035	0.4790347	0.2086688	0.02478419	0.02043397	0.02602014
1	1_87598117_T_G	87598117	0	72	G	T	0.694	0.1875674	0.08161302	0.0246283	0.02029787	0.02587041
1	1_87599697_G_A	87599697	0	72	A	G	0.806	0.2738722	0.09645936	0.005958153	0.004509534	0.007372982
1	1_89289954_AT_ATT	89289954	0	72	ATT	AT	0.049	-0.4785464	0.1960945	0.01728247	0.01394723	0.01876203
1	1_89408588_T_C	89408588	0	72	C	T	0.021	0.7431478	0.3186459	0.02265834	0.01858238	0.02397478
1	1_89408629_A_G	89408629	0	72	G	A	0.021	0.7431478	0.3186459	0.02265834	0.01858238	0.02397478
1	1_89408887_C_T	89408887	0	72	T	C	0.021	0.7431478	0.3186459	0.02265834	0.01858238	0.02397478
1	1_89454063_G_C	89454063	0	72	C	G	0.028	0.5466464	0.2534821	0.03458015	0.02907476	0.03537316
1	1_89582702_A_G	89582702	0	72	G	A	0.028	0.5466464	0.2534821	0.03458015	0.02907476	0.03537316
1	1_89731959_G_A	89731959	0	72	A	G	0.59	0.218066	0.0979776	0.02935497	0.02444527	0.03039644
1	1_89733273_T_C	89733273	0	72	C	T	0.618	0.2192088	0.08980224	0.01725485	0.01392361	0.01873505
1	1_91851193_G_A	91851193	0	72	A	G	0.125	-0.4099701	0.1214631	0.001222049	0.000839208	0.002001065
1	1_91989572_T_G	91989572	0	72	G	T	0.965	-0.5307567	0.2247911	0.02109293	0.01722529	0.02246353
1	1_92108976_T_C	92108976	0	72	C	T	0.09	0.4077842	0.1647506	0.01581515	0.01269567	0.01732582
1	1_92634261_T_C	92634261	0	72	C	T	0.042	0.6303316	0.2562589	0.01645121	0.0132374	0.01794926
1	1_92829194_C_T	92829194	0	72	T	C	0.021	-0.6410305	0.2932514	0.03226635	0.02701942	0.03317217
1	1_94037170_T_C	94037170	0	72	C	T	0.021	0.7304618	0.316418	0.02401632	0.01976406	0.02528219
1	1_94048153_T_C	94048153	0	72	C	T	0.028	0.4953362	0.2229506	0.02963307	0.02469054	0.03066192
1	1_94463356_C_T	94463356	0	72	T	C	0.021	-0.6464409	0.2939183	0.03125376	0.02612255	0.03220763
1	1_94941376_G_A	94941376	0	72	A	G	0.722	0.2308573	0.1016247	0.02627521	0.02173816	0.02745063
1	1_94982785_A_T	94982785	0	72	T	A	0.264	-0.2586543	0.1044963	0.01581162	0.01269267	0.01732235
1	1_99418647_G_C	99418647	0	72	C	G	0.243	0.2169019	0.0966229	0.02803556	0.0232834	0.02913575
1	1_100680593_CT_CTT	100680593	0	72	CTT	CT	0.41	-0.2274019	0.09045931	0.0143147	0.01142288	0.01584928
1	1_101487373_AACACACACAC_AACAC	101487373	0	72	AACAC	AACACACACAC	0.264	0.2021781	0.08714424	0.02334751	0.01918158	0.02463867
1	1_103399917_GA_GAA	103399917	0	72	GAA	GA	0.028	-0.6202768	0.2827635	0.03168445	0.02650382	0.03261799
1	1_107946324_CAA_CA	107946324	0	72	CA	CAA	0.285	-0.3023803	0.1170581	0.01194489	0.00942891	0.01349708
1	1_108138772_A_T	108138772	0	72	T	A	0.056	-0.4362293	0.1958854	0.02926447	0.02436547	0.03031002
1	1_109154974_G_A	109154974	0	72	A	G	0.104	0.3592388	0.1464921	0.01676768	0.0135074	0.01825895
1	1_109170746_C_T	109170746	0	72	T	C	0.819	-0.2746728	0.1229119	0.02872565	0.02389071	0.02979536
1	1_109173710_G_A	109173710	0	72	A	G	0.069	0.4837501	0.1629823	0.004134205	0.003060123	0.005409194
1	1_109235180_C_G	109235180	0	72	G	C	0.056	0.4844241	0.1856372	0.01114119	0.008757745	0.01269251
1	1_109265029_G_T	109265029	0	72	T	G	0.486	0.2078646	0.0867442	0.01931796	0.01569361	0.02074379
1	1_109643255_G_T	109643255	0	72	T	G	0.042	-0.5544195	0.2075796	0.009457127	0.00736092	0.01099247
1	1_109649499_C_T	109649499	0	72	T	C	0.042	-0.5544195	0.2075796	0.009457127	0.00736092	0.01099247
1	1_109656931_G_A	109656931	0	72	A	G	0.028	0.546745	0.2535195	0.03457438	0.02906963	0.03536768
1	1_109774621_C_A	109774621	0	72	A	C	0.049	-0.4348548	0.1947865	0.02888073	0.0240273	0.02994352
1	1_109836685_CA_C	109836685	0	72	C	CA	0.042	0.506944	0.209524	0.01822126	0.01475127	0.01967744
1	1_110551590_T_TA	110551590	0	72	TA	T	0.215	-0.2794049	0.1208596	0.02382395	0.01959642	0.02509717
1	1_111436857_T_G	111436857	0	72	G	T	0.674	0.3347915	0.09439217	0.0007114632	0.0004724495	0.001310746
1	1_111436858_C_T	111436858	0	72	T	C	0.674	0.3347915	0.09439217	0.0007114632	0.0004724495	0.001310746
1	1_111437176_G_GA	111437176	0	72	GA	G	0.674	0.3347915	0.09439217	0.0007114632	0.0004724495	0.001310746
1	1_111437421_C_A	111437421	0	72	A	C	0.771	0.3807463	0.1162712	0.001666078	0.001166266	0.002562735
1	1_111441829_C_T	111441829	0	72	T	C	0.681	0.3184393	0.09522484	0.001346064	0.0009299169	0.002160706
1	1_111663042_G_A	111663042	0	72	A	G	0.062	0.3947137	0.1790824	0.03090642	0.02581528	0.03187657
1	1_111663044_C_A	111663044	0	72	A	C	0.062	0.3947137	0.1790824	0.03090642	0.02581528	0.03187657
1	1_111770423_T_G	111770423	0	72	G	T	0.701	0.2269155	0.09887131	0.02482117	0.02046626	0.02605566
1	1_111778187_A_G	111778187	0	72	G	A	0.368	0.2159484	0.1004154	0.03506966	0.02951061	0.03583831
1	1_111778824_T_C	111778824	0	72	C	T	0.653	0.2159951	0.09881092	0.03226619	0.02701928	0.03317203
1	1_111785930_T_C	111785930	0	72	C	T	0.59	0.2484846	0.1020348	0.01750738	0.01413962	0.01898156
1	1_114377148_T_C	114377148	0	72	C	T	0.333	-0.2114679	0.0903613	0.0222127	0.01819548	0.02354504
1	1_114423653_C_T	114423653	0	72	T	C	0.375	-0.2523908	0.08874709	0.005880579	0.004447276	0.00729086
1	1_114429340_T_C	114429340	0	72	C	T	0.389	-0.2143593	0.09111403	0.02154093	0.01761309	0.02289652
1	1_114438951_A_G	114438951	0	72	G	A	0.389	-0.2143593	0.09111403	0.02154093	0.01761309	0.02289652
1	1_114680745_C_A	114680745	0	72	A	C	0.097	-0.3205968	0.1490178	0.03499999	0.02944856	0.03577212
1	1_114682632_G_T	114682632	0	72	T	G	0.076	-0.3790756	0.1639133	0.02377461	0.01955344	0.0250497
1	1_115276978_GA_G	115276978	0	72	G	GA	0.201	-0.245664	0.1022693	0.01903684	0.01545176	0.02047075
1	1_115399779_G_A	115399779	0	72	A	G	0.111	-0.3370004	0.1372583	0.0166419	0.01340006	0.0181359
1	1_115399788_GA_AA	115399788	0	72	AA	GA	0.132	-0.3398475	0.1288386	0.01033439	0.008086866	0.01188064
1	1_116577919_T_A	116577919	0	72	A	T	0.042	0.6179853	0.2072134	0.003968022	0.00292976	0.005226119
1	1_116609185_G_A	116609185	0	72	A	G	0.16	-0.2220268	0.1031483	0.03490989	0.02936832	0.03568651
1	1_116609833_G_A	116609833	0	72	A	G	0.16	-0.2220268	0.1031483	0.03490989	0.02936832	0.03568651
1	1_117602914_A_G	117602914	0	72	G	A	0.021	-0.6485932	0.2942047	0.03087161	0.0257845	0.03184338
1	1_117602960_C_A	117602960	0	72	A	C	0.778	0.234311	0.09919662	0.0210418	0.01718106	0.02241409
1	1_118165691_C_T	118165691	0	72	T	C	0.25	-0.1948189	0.09095926	0.0357925	0.03015485	0.0365249
1	1_118429131_C_T	118429131	0	72	T	C	0.028	0.5464352	0.2534014	0.03459198	0.02908529	0.03538441
1	1_118492527_G_A	118492527	0	72	A	G	0.056	-0.4809266	0.1857963	0.01177922	0.009290341	0.01333155
1	1_119923247_C_T	119923247	0	72	T	C	0.035	-0.5682596	0.244576	0.02315263	0.01901203	0.02445102
1	1_119923531_A_C	119923531	0	72	C	A	0.681	-0.2537614	0.09723418	0.01113306	0.00875097	0.01268435
1	1_119927680_A_G	119927680	0	72	G	A	0.674	-0.2232711	0.09507863	0.02177558	0.0178164	0.02312315
1	1_120057246_C_A	120057246	0	72	A	C	0.701	-0.2740729	0.09920311	0.007366157	0.005647449	0.008847267
1	1_120389944_C_T	120389944	0	72	T	C	0.035	-0.5388764	0.2508178	0.03524026	0.0296626	0.03600039
1	1_120539213_G_T	120539213	0	72	T	G	0.125	0.4191754	0.1313397	0.002143005	0.00152358	0.003141618
1	1_120612031_G_GCCTCCT	120612031	0	72	GCCTCCT	G	0.028	0.6128622	0.2520119	0.01765962	0.01426994	0.01913009
1	1_120854528_T_C	120854528	0	72	C	T	0.028	0.5440471	0.2510979	0.03376721	0.02835171	0.03460031
1	1_120906120_C_G	120906120	0	72	G	C	0.028	0.5440471	0.2510979	0.03376721	0.02835171	0.03460031
1	1_120934573_C_T	120934573	0	72	T	C	0.028	0.6299004	0.2537001	0.01550602	0.01243284	0.01702231
1	1_142542736_GTGGAATGGAA_GTGGAATGGAATGGAA	142542736	0	72	GTGGAATGGAATGGAA	GTGGAATGGAA	0.139	0.2466062	0.114635	0.03501395	0.02946099	0.03578538
1	1_142542976_T_G	142542976	0	72	G	T	0.688	0.2148499	0.08806105	0.01730897	0.01396989	0.01878791
1	1_142825124_T_C	142825124	0	72	C	T	0.417	-0.3879296	0.1539585	0.01409964	0.01124107	0.01563691
1	1_142849328_T_C	142849328	0	72	C	T	0.028	0.5466084	0.2534677	0.03458233	0.0290767	0.03537523
1	1_143767466_G_A	143767466	0	72	A	G	0.146	-0.3365272	0.1358624	0.0157419	0.01263336	0.01725393
1	1_144190605_T_C	144190605	0	72	C	T	0.125	-0.2979274	0.1392001	0.03592182	0.03027019	0.0366477
1	1_144197743_C_T	144197743	0	72	T	C	0.028	0.5460878	0.2510755	0.03311176	0.02776946	0.03397683
1	1_144520632_C_T	144520632	0	72	T	C	0.083	0.3719223	0.1283251	0.005046008	0.003780734	0.006400202
1	1_144619823_C_A	144619823	0	72	A	C	0.028	0.5440471	0.2510979	0.03376721	0.02835171	0.03460031
1	1_144621642_A_G	144621642	0	72	G	A	0.111	0.3713713	0.1382814	0.009088669	0.007057183	0.01061755
1	1_144621643_G_A	144621643	0	72	A	G	0.111	0.3713713	0.1382814	0.009088669	0.007057183	0.01061755
1	1_144828610_T_G	144828610	0	72	G	T	0.035	0.5302721	0.2248341	0.02123006	0.01734395	0.02259611
1	1_144852379_G_T	144852379	0	72	T	G	0.042	0.4847517	0.2171564	0.02889454	0.02403947	0.02995671
1	1_144856900_C_T	144856900	0	72	T	C	0.028	0.5440471	0.2510979	0.03376721	0.02835171	0.03460031
1	1_144879339_C_T	144879339	0	72	T	C	0.062	0.39129	0.1804991	0.03367603	0.02827068	0.0345136
1	1_144952255_G_C	144952255	0	72	C	G	0.104	0.4105775	0.1394386	0.004423828	0.003288069	0.005726321
1	1_145014299_G_T	145014299	0	72	T	G	0.035	-0.6508121	0.2493321	0.01112052	0.008740522	0.01267176
1	1_145017827_T_TCCCTCCCCTCCCCTCCCTTCCCCCTCCCTCCCTCCCTC	145017827	0	72	TCCCTCCCCTCCCCTCCCTTCCCCCTCCCTCCCTCCCTC	T	0.028	-0.6606574	0.2543574	0.01150574	0.00906184	0.01305794
1	1_145039523_G_T	145039523	0	72	T	G	0.153	0.2840732	0.124917	0.02612084	0.02160292	0.02730266
1	1_145074919_A_G	145074919	0	72	G	A	0.167	-0.3027886	0.1233003	0.01662187	0.01338296	0.0181163
1	1_145074975_G_A	145074975	0	72	A	G	0.146	0.3329373	0.1256553	0.0100127	0.007820222	0.01155565
1	1_145075234_C_T	145075234	0	72	T	C	0.181	0.3481024	0.1185228	0.004519665	0.003363698	0.00583075
1	1_145075923_C_T	145075923	0	72	T	C	0.444	-0.4419894	0.1866636	0.02074263	0.01692239	0.02212469
1	1_145115815_A_C	145115815	0	72	C	A	0.076	0.4884907	0.1546909	0.00237058	0.001695876	0.00341127
1	1_145290398_G_A	145290398	0	72	A	G	0.382	0.3230709	0.1400858	0.02415193	0.01988229	0.02541259
1	1_145293420_C_T	145293420	0	72	T	C	0.062	0.4247318	0.1735477	0.01697926	0.01368808	0.01846581
1	1_145293469_G_C	145293469	0	72	C	G	0.188	-0.2691003	0.1243543	0.03398179	0.02854247	0.03480435
1	1_145293515_A_G	145293515	0	72	G	A	0.382	0.3700169	0.1338707	0.007341042	0.005627029	0.00882121
1	1_145299925_A_G	145299925	0	72	G	A	0.056	0.5530022	0.1770893	0.002631788	0.001894876	0.00371654
1	1_145301836_A_G	145301836	0	72	G	A	0.299	-0.3259443	0.1147665	0.005944595	0.00449865	0.007358636
1	1_145312707_G_T	145312707	0	72	T	G	0.028	0.5466383	0.2534791	0.03458062	0.02907518	0.03537361
1	1_145367657_T_G	145367657	0	72	G	T	0.528	-0.2594438	0.09861838	0.01052894	0.008248367	0.01207683
1	1_145507826_A_T	145507826	0	72	T	A	0.347	0.1898051	0.08784631	0.03424877	0.02877991	0.03505818
1	1_145517063_G_A	145517063	0	72	A	G	0.799	0.2463522	0.106023	0.02314544	0.01900579	0.02444411
1	1_145826770_G_A	145826770	0	72	A	G	0.507	0.1822371	0.07842858	0.02314359	0.01900418	0.02444232
1	1_145826918_G_C	145826918	0	72	C	G	0.069	-0.5559934	0.179633	0.002855407	0.002066201	0.003974745
1	1_146055349_G_A	146055349	0	72	A	G	0.111	-0.3377687	0.1469765	0.02463664	0.02030515	0.02587841
1	1_146242649_G_A	146242649	0	72	A	G	0.021	-0.6408152	0.293227	0.03230851	0.0270568	0.03321232
1	1_146246193_G_A	146246193	0	72	A	G	0.056	0.4355937	0.1591587	0.007907898	0.006088897	0.009407466
1	1_146406332_G_C	146406332	0	72	C	G	0.028	0.5744281	0.2546729	0.02732009	0.02265466	0.0284513
1	1_146406480_C_T	146406480	0	72	T	C	0.035	0.5039058	0.2284571	0.03078893	0.02571139	0.03176456
1	1_147400824_A_C	147400824	0	72	C	A	0.118	-0.3677007	0.135691	0.008511778	0.006583106	0.01002807
1	1_148004440_C_A	148004440	0	72	A	C	0.139	0.3464578	0.1207879	0.00549156	0.00413582	0.006877399
1	1_148009517_C_A	148009517	0	72	A	C	0.028	0.5440471	0.2510979	0.03376721	0.02835171	0.03460031
1	1_148009768_T_A	148009768	0	72	A	T	0.201	0.2279761	0.08012152	0.005856807	0.004428207	0.007265674
1	1_148010017_T_C	148010017	0	72	C	T	0.028	0.5440471	0.2510979	0.03376721	0.02835171	0.03460031
1	1_148011748_TCTTCCCCTTCTTTTCTTCCC_T	148011748	0	72	T	TCTTCCCCTTCTTTTCTTCCC	0.028	0.5440471	0.2510979	0.03376721	0.02835171	0.03460031
1	1_148014331_A_G	148014331	0	72	G	A	0.042	-0.4291303	0.178518	0.01895466	0.01538109	0.02039089
1	1_148014718_A_T	148014718	0	72	T	A	0.125	0.3412042	0.1346241	0.01356815	0.01079247	0.0151112
1	1_148016252_C_G	148016252	0	72	G	C	0.146	0.2995289	0.1155436	0.0116591	0.009189935	0.01321143
1	1_148017420_C_G	148017420	0	72	G	C	0.125	0.3411868	0.1346196	0.01356974	0.01079381	0.01511277
1	1_148017578_C_T	148017578	0	72	T	C	0.132	0.3813543	0.1316635	0.005072522	0.003801813	0.006428716
1	1_148023040_G_C	148023040	0	72	C	G	0.132	0.3813543	0.1316635	0.005072522	0.003801813	0.006428716
1	1_148023510_C_T	148023510	0	72	T	C	0.132	0.3813543	0.1316635	0.005072522	0.003801813	0.006428716
1	1_148023701_T_G	148023701	0	72	G	T	0.028	0.5440471	0.2510979	0.03376721	0.02835171	0.03460031
1	1_148024964_A_G	148024964	0	72	G	A	0.299	0.2573011	0.06944072	0.0004257852	0.000273843	0.0008860976
1	1_148025686_G_A	148025686	0	72	A	G	0.25	-0.3196902	0.1145967	0.006838561	0.005219384	0.008298178
1	1_148346477_C_G	148346477	0	72	G	C	0.083	-0.4042041	0.178883	0.02705422	0.02242127	0.02819681
1	1_148346957_C_T	148346957	0	72	T	C	0.174	-0.308663	0.1219892	0.01371884	0.01091956	0.01526038
1	1_148582481_A_G	148582481	0	72	G	A	0.049	0.7137771	0.1953323	0.0005032192	0.0003270358	0.001005464
1	1_148741864_G_T	148741864	0	72	T	G	0.056	-0.32052	0.1351952	0.02059046	0.0167909	0.0219774
1	1_148752958_C_T	148752958	0	72	T	C	0.042	-0.3781922	0.1740167	0.03324357	0.02788649	0.03410224
1	1_148753353_G_T	148753353	0	72	T	G	0.028	-0.6410401	0.2703905	0.02059046	0.0167909	0.0219774
1	1_148756406_C_T	148756406	0	72	T	C	0.028	-0.6410401	0.2703905	0.02059046	0.0167909	0.0219774
1	1_148873588_A_T	148873588	0	72	T	A	0.104	-0.3801376	0.1401598	0.008457983	0.006538994	0.009972943
1	1_149279725_T_C	149279725	0	72	C	T	0.021	-0.6419953	0.2933633	0.03207937	0.02685369	0.03299414
1	1_149665214_T_G	149665214	0	72	G	T	0.403	0.4229221	0.1699954	0.01530845	0.01226502	0.01682816
1	1_149665383_A_G	149665383	0	72	G	A	0.521	-0.6467497	0.2939588	0.03119829	0.02607347	0.03215477
1	1_149675942_A_G	149675942	0	72	G	A	0.021	-0.6485932	0.2942047	0.03087161	0.0257845	0.03184338
1	1_149764332_G_C	149764332	0	72	C	G	0.069	-0.3331908	0.1405018	0.02055762	0.01676254	0.02194562
1	1_149871905_G_C	149871905	0	72	C	G	0.076	-0.3643449	0.1473295	0.01590318	0.01277057	0.01741218
1	1_149878329_G_A	149878329	0	72	A	G	0.035	-0.6251267	0.2442626	0.01271946	0.01007828	0.01426898
1	1_149880863_A_G	149880863	0	72	G	A	0.188	-0.2784597	0.1062581	0.01081834	0.008488933	0.01236817
1	1_149880882_C_T	149880882	0	72	T	C	0.035	-0.6251267	0.2442626	0.01271946	0.01007828	0.01426898
1	1_149881173_A_C	149881173	0	72	C	A	0.222	-0.2443606	0.1068804	0.02535708	0.02093455	0.02657014
1	1_149897528_T_A	149897528	0	72	A	T	0.076	-0.3643449	0.1473295	0.01590318	0.01277057	0.01741218
1	1_149897966_T_G	149897966	0	72	G	T	0.076	-0.3643449	0.1473295	0.01590318	0.01277057	0.01741218
1	1_149900610_T_C	149900610	0	72	C	T	0.076	-0.3643449	0.1473295	0.01590318	0.01277057	0.01741218
1	1_149902588_A_G	149902588	0	72	G	A	0.076	-0.3643449	0.1473295	0.01590318	0.01277057	0.01741218
1	1_149902998_G_T	149902998	0	72	T	G	0.076	-0.3643449	0.1473295	0.01590318	0.01277057	0.01741218
1	1_149903122_G_C	149903122	0	72	C	G	0.076	-0.3643449	0.1473295	0.01590318	0.01277057	0.01741218
1	1_149906167_T_G	149906167	0	72	G	T	0.076	-0.3643449	0.1473295	0.01590318	0.01277057	0.01741218
1	1_149907258_C_T	149907258	0	72	T	C	0.076	-0.3643449	0.1473295	0.01590318	0.01277057	0.01741218
1	1_149907276_A_G	149907276	0	72	G	A	0.076	-0.3643449	0.1473295	0.01590318	0.01277057	0.01741218
1	1_149908016_A_AAG	149908016	0	72	AAG	A	0.056	0.5453158	0.2001209	0.008169372	0.006302618	0.009676655
1	1_149908141_A_AG	149908141	0	72	AG	A	0.028	0.7255586	0.2789056	0.01138197	0.008958532	0.01293397
1	1_149908182_G_A	149908182	0	72	A	G	0.028	0.7255586	0.2789056	0.01138197	0.008958532	0.01293397
1	1_149939610_G_A	149939610	0	72	A	G	0.042	-0.6646501	0.2326947	0.005679906	0.004286454	0.007077929
1	1_149943157_G_A	149943157	0	72	A	G	0.076	-0.3643449	0.1473295	0.01590318	0.01277057	0.01741218
1	1_149949471_C_T	149949471	0	72	T	C	0.028	0.7255586	0.2789056	0.01138197	0.008958532	0.01293397
1	1_150241230_G_T	150241230	0	72	T	G	0.083	0.5019219	0.1370004	0.0004879199	0.0003164831	0.0009821823
1	1_150469480_C_T	150469480	0	72	T	C	0.076	0.6006625	0.1538407	0.0002195677	0.0001354842	0.0005422262
1	1_150530265_GGCT_G	150530265	0	72	G	GGCT	0.049	0.5641447	0.1922818	0.004559321	0.003395021	0.005873891
1	1_150530270_AGCC_A	150530270	0	72	A	AGCC	0.049	0.5641447	0.1922818	0.004559321	0.003395021	0.005873891
1	1_150956218_AT_A	150956218	0	72	A	AT	0.042	0.5252306	0.205899	0.01299953	0.01031367	0.0145473
1	1_150973514_G_A	150973514	0	72	A	G	0.764	0.2604834	0.1149066	0.02657964	0.02200497	0.02774231
1	1_150978741_A_G	150978741	0	72	G	A	0.076	-0.406298	0.1533392	0.01001108	0.007818882	0.01155401
1	1_150990466_C_CAT	150990466	0	72	CAT	C	0.486	0.1965445	0.08449929	0.02300821	0.01888645	0.02431193
1	1_150993866_G_A	150993866	0	72	A	G	0.486	0.2591405	0.1165974	0.02957687	0.02464097	0.03060828
1	1_151342104_A_C	151342104	0	72	C	A	0.028	-0.6129288	0.2809918	0.03262207	0.02733488	0.03351082
1	1_151508061_A_C	151508061	0	72	C	A	0.326	0.2342985	0.09570397	0.01694432	0.01365823	0.01843166
1	1_151518479_CT_C	151518479	0	72	C	CT	0.153	-0.2758142	0.1134449	0.01768723	0.01429358	0.01915702
1	1_151542099_G_T	151542099	0	72	T	G	0.625	0.1982373	0.08073492	0.0166342	0.01339349	0.01812837
1	1_151554503_T_C	151554503	0	72	C	T	0.583	0.172683	0.0781582	0.03051799	0.0254719	0.03150621
1	1_151811226_G_A	151811226	0	72	A	G	0.944	0.4951869	0.1849287	0.009284518	0.007218541	0.01081698
1	1_151825920_A_G	151825920	0	72	G	A	0.028	-0.6299234	0.2850603	0.03048983	0.02544701	0.03147935
1	1_152189055_G_C	152189055	0	72	C	G	0.931	0.3220056	0.1356942	0.02047628	0.01669228	0.02186686
1	1_152193052_A_G	152193052	0	72	G	A	0.931	0.3925573	0.1582503	0.01559562	0.01250899	0.01711032
1	1_152278237_T_C	152278237	0	72	C	T	0.028	-0.6240386	0.2664944	0.0221355	0.01812849	0.02347055
1	1_152278245_G_C	152278245	0	72	C	G	0.028	-0.6240386	0.2664944	0.0221355	0.01812849	0.02347055
1	1_152278247_A_G	152278247	0	72	G	A	0.028	-0.6240386	0.2664944	0.0221355	0.01812849	0.02347055
1	1_152681835_G_T	152681835	0	72	T	G	0.049	-0.3804089	0.1631902	0.02272157	0.01863731	0.02403572
1	1_153190590_G_GT	153190590	0	72	GT	G	0.229	0.2166667	0.1006182	0.03484011	0.02930619	0.03562021
1	1_153233488_C_CGGCGGT	153233488	0	72	CGGCGGT	C	0.229	0.258747	0.09657236	0.009244813	0.007185812	0.01077658
1	1_153233701_A_C	153233701	0	72	C	A	0.347	0.2229261	0.08107208	0.007634134	0.005865581	0.009124806
1	1_153234295_G_A	153234295	0	72	A	G	0.236	0.2402645	0.09672452	0.01546014	0.01239386	0.01697724
1	1_153391729_G_A	153391729	0	72	A	G	0.146	-0.287875	0.1249362	0.02427416	0.01998887	0.02553009
1	1_153391786_T_C	153391786	0	72	C	T	0.146	-0.287875	0.1249362	0.02427416	0.01998887	0.02553009
1	1_153617510_CT_C	153617510	0	72	C	CT	0.125	0.3673758	0.1326358	0.007224381	0.005532233	0.008700072
1	1_153631198_T_C	153631198	0	72	C	T	0.021	0.7304618	0.316418	0.02401632	0.01976406	0.02528219
1	1_153631884_A_G	153631884	0	72	G	A	0.021	0.7304618	0.316418	0.02401632	0.01976406	0.02528219
1	1_153800931_TACACACACAC_TAC	153800931	0	72	TAC	TACACACACAC	0.271	-0.1956281	0.08902753	0.03140257	0.02625425	0.03234944
1	1_153906397_A_G	153906397	0	72	G	A	0.611	0.2155363	0.08631936	0.01495323	0.01196362	0.01647871
1	1_153907305_G_GC	153907305	0	72	GC	G	0.049	0.5542973	0.1900437	0.00478922	0.003576929	0.006123212
1	1_153907306_T_TGC	153907306	0	72	TGC	T	0.042	0.5610256	0.2048509	0.00786803	0.006056347	0.009366355
1	1_153927052_C_G	153927052	0	72	G	C	0.347	0.2102957	0.08753027	0.01901677	0.01543449	0.02045124
1	1_154235657_G_A	154235657	0	72	A	G	0.042	0.5611153	0.2048887	0.007869473	0.006057525	0.009367844
1	1_154245512_A_G	154245512	0	72	G	A	0.535	-0.1939128	0.0764589	0.01350914	0.01074273	0.01505275
1	1_154285052_G_A	154285052	0	72	A	G	0.319	0.2532836	0.09092291	0.006914627	0.005280982	0.008377572
1	1_154310048_C_G	154310048	0	72	G	C	0.424	-0.1802351	0.08403571	0.03554931	0.02993803	0.03629395
1	1_154310223_G_GA	154310223	0	72	GA	G	0.312	0.2992092	0.08865343	0.00122289	0.000839821	0.002002155
1	1_154313232_T_C	154313232	0	72	C	T	0.66	-0.3343547	0.09303472	0.0006117067	0.0004024053	0.001166944
1	1_154317281_G_A	154317281	0	72	A	G	0.167	0.3710877	0.1177945	0.002424626	0.001736946	0.003474783
1	1_154318172_A_G	154318172	0	72	G	A	0.167	0.3710877	0.1177945	0.002424626	0.001736946	0.003474783
1	1_154351277_G_T	154351277	0	72	T	G	0.146	0.33621	0.1267211	0.009918143	0.007741942	0.01145997
1	1_154351304_A_G	154351304	0	72	G	A	0.146	0.33621	0.1267211	0.009918143	0.007741942	0.01145997
1	1_154351323_T_C	154351323	0	72	C	T	0.146	0.33621	0.1267211	0.009918143	0.007741942	0.01145997
1	1_154442960_G_A	154442960	0	72	A	G	0.569	0.2286507	0.09484039	0.01862109	0.01509445	0.02006657
1	1_154473660_T_C	154473660	0	72	C	T	0.514	0.2155657	0.09510782	0.02660371	0.02202607	0.02776537
1	1_154479670_C_T	154479670	0	72	T	C	0.514	0.2155657	0.09510782	0.02660371	0.02202607	0.02776537
1	1_154492702_G_A	154492702	0	72	A	G	0.521	0.2346162	0.09355011	0.01453628	0.01161037	0.01606788
1	1_154514331_C_A	154514331	0	72	A	C	0.604	0.2528983	0.08628349	0.004597618	0.003425286	0.005915515
1	1_154904840_T_C	154904840	0	72	C	T	0.174	-0.327623	0.1301894	0.01421676	0.01134006	0.01575259
1	1_154917551_C_T	154917551	0	72	T	C	0.035	-0.5616738	0.2259895	0.01540503	0.01234704	0.01692308
1	1_155003954_G_A	155003954	0	72	A	G	0.132	0.2672501	0.1098126	0.01757863	0.01420061	0.01905109
1	1_155012778_CA_CAA	155012778	0	72	CAA	CA	0.035	-0.505743	0.2266674	0.0289679	0.02410409	0.03002678
1	1_155026871_G_T	155026871	0	72	T	G	0.118	0.2867354	0.1104123	0.0115181	0.009072164	0.01307032
1	1_155029253_A_C	155029253	0	72	C	A	0.118	-0.2844618	0.1198153	0.02041782	0.0166418	0.02181025
1	1_155144757_T_C	155144757	0	72	C	T	0.111	0.3600796	0.1422784	0.01369882	0.01090266	0.01524056
1	1_155145845_C_T	155145845	0	72	T	C	0.021	0.7304618	0.316418	0.02401632	0.01976406	0.02528219
1	1_155150593_G_A	155150593	0	72	A	G	0.021	0.7304618	0.316418	0.02401632	0.01976406	0.02528219
1	1_155167786_A_G	155167786	0	72	G	A	0.194	0.324037	0.1048691	0.00289991	0.002100397	0.004025818
1	1_155172725_T_C	155172725	0	72	C	T	0.181	0.3383298	0.106947	0.0023307	0.001665607	0.003364279
1	1_155265192_G_A	155265192	0	72	A	G	0.021	0.7304618	0.316418	0.02401632	0.01976406	0.02528219
1	1_155721678_T_C	155721678	0	72	C	T	0.021	0.7304618	0.316418	0.02401632	0.01976406	0.02528219
1	1_155790378_A_C	155790378	0	72	C	A	0.021	0.7304618	0.316418	0.02401632	0.01976406	0.02528219
1	1_155792322_T_C	155792322	0	72	C	T	0.021	0.7304618	0.316418	0.02401632	0.01976406	0.02528219
1	1_155884143_T_C	155884143	0	72	C	T	0.035	-0.543566	0.2243476	0.0180667	0.01461872	0.0195269
1	1_155941871_T_C	155941871	0	72	C	T	0.021	0.7304618	0.316418	0.02401632	0.01976406	0.02528219
1	1_155981489_C_G	155981489	0	72	G	C	0.514	0.2428996	0.09020114	0.008912438	0.006912165	0.01043781
1	1_156096376_G_A	156096376	0	72	A	G	0.035	-0.5460742	0.2262459	0.01849332	0.01498474	0.01994227
1	1_156096387_G_A	156096387	0	72	A	G	0.146	0.3324873	0.1273649	0.01111205	0.008733468	0.01266327
1	1_156104083_C_T	156104083	0	72	T	C	0.028	0.7173823	0.277627	0.01191925	0.009407461	0.01347148
1	1_156104375_G_T	156104375	0	72	T	G	0.035	-0.5460742	0.2262459	0.01849332	0.01498474	0.01994227
1	1_156104392_C_T	156104392	0	72	T	C	0.035	-0.5460742	0.2262459	0.01849332	0.01498474	0.01994227
1	1_156105962_A_G	156105962	0	72	G	A	0.028	0.7173823	0.277627	0.01191925	0.009407461	0.01347148
1	1_156846233_G_A	156846233	0	72	A	G	0.222	-0.3727506	0.106691	0.0008424797	0.000565359	0.001494237
1	1_156848995_C_T	156848995	0	72	T	C	0.569	0.2849149	0.08596472	0.001475364	0.001025039	0.002324724
1	1_156875092_G_A	156875092	0	72	A	G	0.639	0.2439077	0.09839946	0.01567024	0.01257243	0.01718359
1	1_156875097_G_A	156875097	0	72	A	G	0.66	0.2545057	0.09767246	0.0112544	0.008852123	0.01280609
1	1_156875107_C_A	156875107	0	72	A	C	0.639	0.2439077	0.09839946	0.01567024	0.01257243	0.01718359
1	1_156875935_T_C	156875935	0	72	C	T	0.208	-0.2883457	0.1086704	0.009911616	0.00773654	0.01145336
1	1_156876206_G_A	156876206	0	72	A	G	0.208	-0.2883457	0.1086704	0.009911616	0.00773654	0.01145336
1	1_156876221_G_A	156876221	0	72	A	G	0.208	-0.2883457	0.1086704	0.009911616	0.00773654	0.01145336
1	1_156876237_C_T	156876237	0	72	T	C	0.208	-0.2883457	0.1086704	0.009911616	0.00773654	0.01145336
1	1_156876373_A_G	156876373	0	72	G	A	0.215	-0.3272158	0.109029	0.003758023	0.002765499	0.004993518
1	1_156876729_T_C	156876729	0	72	C	T	0.208	-0.2883457	0.1086704	0.009911616	0.00773654	0.01145336
1	1_156877249_A_G	156877249	0	72	G	A	0.208	-0.2551704	0.1103347	0.02377255	0.01955165	0.02504773
1	1_156877884_T_TG	156877884	0	72	TG	T	0.174	-0.2552126	0.1138339	0.02822892	0.02345348	0.02932062
1	1_156878531_T_C	156878531	0	72	C	T	0.194	-0.2479583	0.1065102	0.02289312	0.01878639	0.02420104
1	1_156878737_T_C	156878737	0	72	C	T	0.194	-0.2479583	0.1065102	0.02289312	0.01878639	0.02420104
1	1_156878887_G_A	156878887	0	72	A	G	0.188	-0.2978493	0.1106401	0.008931989	0.006928245	0.01045776
1	1_156882757_C_G	156882757	0	72	G	C	0.035	-0.5255431	0.2288129	0.02471442	0.02037305	0.02595313
1	1_156884365_T_C	156884365	0	72	C	T	0.778	-0.2210938	0.09579061	0.02404224	0.01978666	0.02530712
1	1_158326476_A_T	158326476	0	72	T	A	0.028	-0.570283	0.2515845	0.02658922	0.02201337	0.0277515
1	1_158580921_GCACA_GCA	158580921	0	72	GCA	GCACA	0.257	0.3144095	0.1182856	0.00978862	0.007634785	0.0113288
1	1_159169641_T_C	159169641	0	72	C	T	0.75	0.2305887	0.1021321	0.02717546	0.02252768	0.02831288
1	1_159174683_T_C	159174683	0	72	C	T	0.208	-0.4020893	0.1736731	0.02362637	0.01942433	0.02490708
1	1_159175004_CT_C	159175004	0	72	C	CT	0.75	-0.2463059	0.09449808	0.01123179	0.008833272	0.01278341
1	1_159336134_T_C	159336134	0	72	C	T	0.049	-0.4308099	0.1955212	0.03095781	0.02586073	0.03192555
1	1_159409479_T_G	159409479	0	72	G	T	0.111	0.3348596	0.1270488	0.01039249	0.008135076	0.01193926
1	1_159409884_G_A	159409884	0	72	A	G	0.111	0.3348596	0.1270488	0.01039249	0.008135076	0.01193926
1	1_159778983_T_C	159778983	0	72	C	T	0.292	-0.2536217	0.09650723	0.01060715	0.008313346	0.01215563
1	1_159783559_C_T	159783559	0	72	T	C	0.271	-0.2641511	0.09376279	0.006335684	0.004813209	0.007771197
1	1_159784174_A_G	159784174	0	72	G	A	0.097	-0.3425081	0.1462321	0.02210456	0.01810166	0.0234407
1	1_159785370_T_C	159785370	0	72	C	T	0.16	-0.3138849	0.1209639	0.0115818	0.00912536	0.01313409
1	1_159785413_C_T	159785413	0	72	T	C	0.097	-0.3571306	0.1504866	0.02046867	0.01668571	0.02185949
1	1_159785425_A_G	159785425	0	72	G	A	0.264	-0.3037011	0.08956004	0.001163528	0.0007965963	0.001924847
1	1_160123101_C_T	160123101	0	72	T	C	0.021	0.6862851	0.2955459	0.02322994	0.01907928	0.02452547
1	1_160141286_C_G	160141286	0	72	G	C	0.41	0.2211903	0.08987009	0.0163893	0.01318462	0.01788863
1	1_160232929_ATT_AT	160232929	0	72	AT	ATT	0.257	0.2933519	0.1153753	0.01328514	0.01055401	0.01483073
1	1_160254955_G_A	160254955	0	72	A	G	0.056	0.4385088	0.1827025	0.01913292	0.01553439	0.02056409
1	1_160281924_C_A	160281924	0	72	A	C	0.035	0.5298233	0.2249374	0.02139301	0.01748499	0.0227536
1	1_160461188_G_GA	160461188	0	72	GA	G	0.042	-0.5686	0.2040744	0.006904259	0.005272584	0.008366755
1	1_161088695_A_C	161088695	0	72	C	A	0.056	0.4514251	0.1829103	0.01610724	0.01294429	0.01761228
1	1_161284297_T_C	161284297	0	72	C	T	0.083	0.3960334	0.1523979	0.01146564	0.009028365	0.01301779
1	1_161293491_TA_T	161293491	0	72	T	TA	0.028	0.6578708	0.2812669	0.02228382	0.01825719	0.02361364
1	1_161326722_CT_C	161326722	0	72	C	CT	0.306	0.2724168	0.1183924	0.02446551	0.0201558	0.02571399
1	1_161332307_G_C	161332307	0	72	C	G	0.028	0.5466759	0.2534934	0.03457844	0.02907324	0.03537154
1	1_162822771_A_C	162822771	0	72	C	A	0.924	0.3785436	0.175671	0.03471865	0.02919805	0.03550479
1	1_162825258_T_C	162825258	0	72	C	T	0.201	0.2264929	0.1012182	0.02852232	0.02371168	0.02960106
1	1_163122528_G_C	163122528	0	72	C	G	0.507	0.2016658	0.075342	0.0093107	0.007240128	0.01084362
1	1_163137907_T_A	163137907	0	72	A	T	0.16	-0.2514471	0.1158837	0.03351776	0.02813004	0.03436307
1	1_164853647_G_C	164853647	0	72	C	G	0.194	0.2614777	0.1037051	0.01403919	0.01119	0.01557718
1	1_165375870_G_A	165375870	0	72	A	G	0.028	0.6148584	0.2545049	0.01838779	0.01489415	0.01983956
1	1_165601566_T_C	165601566	0	72	C	T	0.139	-0.3062728	0.1302905	0.02164569	0.01770385	0.02299771
1	1_165721489_ATTTT_TTTTT	165721489	0	72	TTTTT	ATTTT	0.139	0.2779962	0.09790603	0.005955336	0.004507273	0.007370001
1	1_166591271_T_C	166591271	0	72	C	T	0.139	0.3386759	0.1269912	0.009558174	0.007444341	0.01109509
1	1_166827674_T_C	166827674	0	72	C	T	0.451	-0.1770975	0.07884566	0.02794797	0.02320638	0.02905199
1	1_166831404_A_C	166831404	0	72	C	A	0.451	-0.1912846	0.0760152	0.01422085	0.01134353	0.01575663
1	1_166831703_C_CA	166831703	0	72	CA	C	0.451	-0.1912846	0.0760152	0.01422085	0.01134353	0.01575663
1	1_166833199_C_A	166833199	0	72	A	C	0.451	-0.1912846	0.0760152	0.01422085	0.01134353	0.01575663
1	1_166905927_C_T	166905927	0	72	T	C	0.132	0.2917614	0.1215293	0.01910291	0.01550858	0.02053493
1	1_168054005_AT_A	168054005	0	72	A	AT	0.028	-0.6635992	0.2546777	0.01125627	0.008853679	0.01280796
1	1_168262522_AGT_A	168262522	0	72	A	AGT	0.118	-0.3608101	0.1340666	0.008950872	0.006943777	0.01047703
1	1_168549422_C_T	168549422	0	72	T	C	0.528	0.3301537	0.1038526	0.002224796	0.001585381	0.00323896
1	1_168550144_A_G	168550144	0	72	G	A	0.042	-0.7213974	0.2527578	0.005715295	0.00431479	0.007115532
1	1_169138307_C_A	169138307	0	72	A	C	0.368	-0.1912195	0.08108271	0.02123942	0.01735204	0.02260515
1	1_169293826_G_C	169293826	0	72	C	G	0.056	-0.4523161	0.1875573	0.01858757	0.01506566	0.02003396
1	1_169394226_A_G	169394226	0	72	G	A	0.729	-0.2076675	0.09332367	0.02938535	0.02447205	0.03042544
1	1_169515874_T_A	169515874	0	72	A	T	0.229	0.227402	0.1013435	0.02810013	0.02334019	0.02919749
1	1_169762807_T_G	169762807	0	72	G	T	0.146	0.2791388	0.1128487	0.01587984	0.01275071	0.01738929
1	1_169767985_A_AT	169767985	0	72	AT	A	0.049	-0.6184426	0.1905217	0.00181761	0.001279191	0.00274896
1	1_171514875_T_TATTC	171514875	0	72	TATTC	T	0.132	-0.2224267	0.1023802	0.03330262	0.02793893	0.03415841
1	1_171535301_T_G	171535301	0	72	G	T	0.146	-0.3024461	0.1255713	0.01873121	0.01518904	0.02017366
1	1_172307678_T_C	172307678	0	72	C	T	0.16	0.2679779	0.1202736	0.02918691	0.0242971	0.03023596
1	1_173472551_T_C	173472551	0	72	C	T	0.153	0.3343971	0.1122633	0.004010295	0.002962891	0.00527277
1	1_173474429_T_C	173474429	0	72	C	T	0.153	0.3343971	0.1122633	0.004010295	0.002962891	0.00527277
1	1_173516871_G_C	173516871	0	72	C	G	0.174	0.2857912	0.1077299	0.009926139	0.00774856	0.01146806
1	1_173552783_G_A	173552783	0	72	A	G	0.326	0.2214109	0.09632846	0.02461345	0.0202849	0.02585613
1	1_173569176_T_C	173569176	0	72	C	T	0.118	0.3117996	0.1261336	0.01594459	0.01280581	0.0174528
1	1_173797451_TC_T	173797451	0	72	T	TC	0.035	0.4995873	0.2306302	0.03380621	0.02838638	0.0346374
1	1_173836602_G_A	173836602	0	72	A	G	0.354	-0.2022755	0.09153625	0.03049019	0.02544733	0.0314797
1	1_173839240_C_T	173839240	0	72	T	C	0.347	-0.2229023	0.09066183	0.01649887	0.01327805	0.01799592
1	1_173907812_C_T	173907812	0	72	T	C	0.271	-0.2414301	0.1098874	0.03142659	0.02627551	0.03237232
1	1_173952836_A_G	173952836	0	72	G	A	0.167	-0.2577978	0.1110254	0.02323691	0.01908535	0.02453219
1	1_173953860_G_C	173953860	0	72	C	G	0.167	-0.2577978	0.1110254	0.02323691	0.01908535	0.02453219
1	1_173961837_CAG_C	173961837	0	72	C	CAG	0.09	-0.3247021	0.1497759	0.03366836	0.02826386	0.0345063
1	1_174219799_G_T	174219799	0	72	T	G	0.083	-0.3211243	0.1471529	0.03254941	0.02727042	0.03344165
1	1_174926860_CTT_CTTT	174926860	0	72	CTTT	CTT	0.035	0.4387473	0.1947425	0.0274915	0.02280521	0.02861534
1	1_174978933_G_A	174978933	0	72	A	G	0.118	-0.3416735	0.1254431	0.008196077	0.006324469	0.009704107
1	1_174984069_CT_C	174984069	0	72	C	CT	0.132	-0.281112	0.1025712	0.007826157	0.00602217	0.009323158
1	1_174984072_TTC_T	174984072	0	72	T	TTC	0.056	0.3727896	0.1474651	0.01379976	0.01098783	0.01534044
1	1_177199323_C_T	177199323	0	72	T	C	0.326	0.2174933	0.08413977	0.0118902	0.009383158	0.01344246
1	1_177899121_G_C	177899121	0	72	C	G	0.271	0.2001763	0.0833226	0.01902263	0.01543953	0.02045693
1	1_177929554_C_T	177929554	0	72	T	C	0.403	0.1956315	0.08644472	0.02682735	0.02222221	0.02797958
1	1_177931122_G_A	177931122	0	72	A	G	0.201	0.2704212	0.09552327	0.006097997	0.00462189	0.007520762
1	1_177933505_C_T	177933505	0	72	T	C	0.201	0.2422378	0.1014789	0.01976964	0.01608263	0.02118209
1	1_177934351_G_T	177934351	0	72	T	G	0.174	0.3251542	0.104901	0.002818029	0.002037506	0.003931772
1	1_177935050_T_A	177935050	0	72	A	T	0.194	0.2752786	0.1020442	0.008798037	0.006818117	0.01032097
1	1_178063897_A_G	178063897	0	72	G	A	0.035	-0.6251267	0.2442626	0.01271946	0.01007828	0.01426898
1	1_178389821_G_A	178389821	0	72	A	G	0.035	-0.6251267	0.2442626	0.01271946	0.01007828	0.01426898
1	1_178414599_A_G	178414599	0	72	G	A	0.035	-0.6251267	0.2442626	0.01271946	0.01007828	0.01426898
1	1_178484065_A_G	178484065	0	72	G	A	0.021	-0.6464716	0.2939223	0.03124822	0.02611765	0.03220235
1	1_179311387_A_ATTCCC	179311387	0	72	ATTCCC	A	0.028	0.632406	0.2767551	0.02543286	0.02100081	0.02664286
1	1_179319631_A_G	179319631	0	72	G	A	0.028	0.632406	0.2767551	0.02543286	0.02100081	0.02664286
1	1_179380472_GT_G	179380472	0	72	G	GT	0.729	-0.1924544	0.08974105	0.03556526	0.02995224	0.0363091
1	1_179401896_G_A	179401896	0	72	A	G	0.729	-0.1924544	0.08974105	0.03556526	0.02995224	0.0363091
1	1_180217152_C_T	180217152	0	72	T	C	0.222	0.2501538	0.09694274	0.01203122	0.009501173	0.01358328
1	1_180217192_C_A	180217192	0	72	A	C	0.208	0.240759	0.1014903	0.02051652	0.01672703	0.02190582
1	1_180217250_C_T	180217250	0	72	T	C	0.215	0.266346	0.100345	0.009887513	0.007716594	0.01142896
1	1_181685432_TA_TAA	181685432	0	72	TAA	TA	0.118	-0.3633037	0.1159552	0.002551691	0.00183372	0.003623374
1	1_181690745_A_T	181690745	0	72	T	A	0.042	0.5917702	0.2495236	0.02054912	0.0167552	0.02193739
1	1_181695070_T_C	181695070	0	72	C	T	0.042	0.5917702	0.2495236	0.02054912	0.0167552	0.02193739
1	1_181695088_T_G	181695088	0	72	G	T	0.042	0.5917702	0.2495236	0.02054912	0.0167552	0.02193739
1	1_182993025_C_T	182993025	0	72	T	C	0.507	-0.1785392	0.0800727	0.0290721	0.02419592	0.03012632
1	1_183084607_A_G	183084607	0	72	G	A	0.521	-0.1718202	0.07850752	0.03206527	0.02684119	0.0329807
1	1_183084608_C_A	183084608	0	72	A	C	0.521	-0.1718202	0.07850752	0.03206527	0.02684119	0.0329807
1	1_183100563_G_GTGTGT	183100563	0	72	GTGTGT	G	0.118	-0.3161099	0.1166981	0.008536159	0.006603104	0.01005305
1	1_183525452_T_G	183525452	0	72	G	T	0.875	-0.31359	0.1230147	0.01305761	0.01036251	0.01460497
1	1_183617266_C_G	183617266	0	72	G	C	0.229	0.209151	0.09388346	0.02920765	0.02431538	0.03025576
1	1_184024119_A_G	184024119	0	72	G	A	0.021	0.7304618	0.316418	0.02401632	0.01976406	0.02528219
1	1_184777177_C_A	184777177	0	72	A	C	0.111	-0.2778504	0.1238594	0.02814075	0.02337592	0.02923632
1	1_186274133_C_T	186274133	0	72	T	C	0.201	0.2300373	0.1052923	0.03235754	0.02710027	0.033259
1	1_186275760_G_A	186275760	0	72	A	G	0.201	0.2300373	0.1052923	0.03235754	0.02710027	0.033259
1	1_186276267_GGAGCCTGCACCCACCACTCCCAAA_G	186276267	0	72	G	GGAGCCTGCACCCACCACTCCCAAA	0.097	0.3239744	0.1238064	0.01092861	0.008580692	0.01247902
1	1_186286782_A_G	186286782	0	72	G	A	0.201	0.2300373	0.1052923	0.03235754	0.02710027	0.033259
1	1_186295021_A_G	186295021	0	72	G	A	0.125	0.3447649	0.1140091	0.003517141	0.002577764	0.004724842
1	1_186313293_G_A	186313293	0	72	A	G	0.201	0.2300373	0.1052923	0.03235754	0.02710027	0.033259
1	1_186316488_C_T	186316488	0	72	T	C	0.118	0.3202513	0.1176768	0.008247277	0.006366375	0.009756717
1	1_192129667_CTGAT_C	192129667	0	72	C	CTGAT	0.042	-0.5912269	0.2060736	0.00548085	0.004127264	0.006865976
1	1_192545099_G_A	192545099	0	72	A	G	0.653	0.2305031	0.09390317	0.01666479	0.01341958	0.01815829
1	1_192548543_T_G	192548543	0	72	G	T	0.16	0.2713158	0.1217856	0.0292047	0.02431278	0.03025295
1	1_192548559_G_C	192548559	0	72	C	G	0.16	0.2713158	0.1217856	0.0292047	0.02431278	0.03025295
1	1_196620917_C_T	196620917	0	72	T	C	0.215	0.3456009	0.0956268	0.0005731178	0.0003754932	0.00111018
1	1_196695742_A_G	196695742	0	72	G	A	0.125	0.2883652	0.1113721	0.01175617	0.009271068	0.01330851
1	1_196706642_C_T	196706642	0	72	T	C	0.035	-0.5068628	0.2266765	0.02863272	0.02380888	0.02970656
1	1_196709774_G_T	196709774	0	72	T	G	0.125	0.2883652	0.1113721	0.01175617	0.009271068	0.01330851
1	1_196743964_C_A	196743964	0	72	A	C	0.201	0.2021671	0.08395526	0.01875604	0.01521038	0.02019781
1	1_196757881_G_T	196757881	0	72	T	G	0.201	0.2021671	0.08395526	0.01875604	0.01521038	0.02019781
1	1_196789161_C_G	196789161	0	72	G	C	0.229	-0.2047394	0.08589398	0.01994091	0.01623028	0.02134817
1	1_196946775_T_C	196946775	0	72	C	T	0.194	-0.3648677	0.1093192	0.001373123	0.0009497792	0.002195225
1	1_197026672_A_G	197026672	0	72	G	A	0.84	0.3476336	0.1110813	0.002579124	0.001854654	0.003655326
1	1_197030201_T_C	197030201	0	72	C	T	0.771	0.2881285	0.1035417	0.006971549	0.005327103	0.008436932
1	1_197031021_C_T	197031021	0	72	T	C	0.743	0.2745818	0.1136752	0.01840663	0.01491032	0.0198579
1	1_197053373_G_A	197053373	0	72	A	G	0.771	0.2881285	0.1035417	0.006971549	0.005327103	0.008436932
1	1_197055925_T_C	197055925	0	72	C	T	0.778	0.3157053	0.1039465	0.003384716	0.002474885	0.004576219
1	1_197059928_A_G	197059928	0	72	G	A	0.743	0.2745818	0.1136752	0.01840663	0.01491032	0.0198579
1	1_197063352_C_T	197063352	0	72	T	C	0.34	0.203798	0.09143795	0.02913506	0.0242514	0.03018644
1	1_197070442_G_T	197070442	0	72	T	G	0.34	0.203798	0.09143795	0.02913506	0.0242514	0.03018644
1	1_197070697_T_C	197070697	0	72	C	T	0.34	0.203798	0.09143795	0.02913506	0.0242514	0.03018644
1	1_197070707_G_A	197070707	0	72	A	G	0.34	0.203798	0.09143795	0.02913506	0.0242514	0.03018644
1	1_197070815_T_C	197070815	0	72	C	T	0.826	0.3264759	0.1088514	0.003778754	0.002781691	0.005016546
1	1_197072420_T_C	197072420	0	72	C	T	0.34	0.203798	0.09143795	0.02913506	0.0242514	0.03018644
1	1_197073932_T_C	197073932	0	72	C	T	0.34	0.203798	0.09143795	0.02913506	0.0242514	0.03018644
1	1_197091537_A_T	197091537	0	72	T	A	0.771	0.2881285	0.1035417	0.006971549	0.005327103	0.008436932
1	1_197091808_T_C	197091808	0	72	C	T	0.34	0.203798	0.09143795	0.02913506	0.0242514	0.03018644
1	1_197104149_TA_T	197104149	0	72	T	TA	0.743	0.2745818	0.1136752	0.01840663	0.01491032	0.0198579
1	1_197109042_C_T	197109042	0	72	T	C	0.771	0.2881285	0.1035417	0.006971549	0.005327103	0.008436932
1	1_197112533_G_A	197112533	0	72	A	G	0.743	0.2745818	0.1136752	0.01840663	0.01491032	0.0198579
1	1_197113073_G_A	197113073	0	72	A	G	0.743	0.2745818	0.1136752	0.01840663	0.01491032	0.0198579
1	1_197147471_A_C	197147471	0	72	C	A	0.34	0.203798	0.09143795	0.02913506	0.0242514	0.03018644
1	1_197150256_GA_G	197150256	0	72	G	GA	0.208	-0.2610086	0.118095	0.03046313	0.02542342	0.03145389
1	1_197446702_G_T	197446702	0	72	T	G	0.368	-0.2002481	0.09202307	0.03302833	0.02769539	0.03389745
1	1_197887584_A_G	197887584	0	72	G	A	0.049	0.6310656	0.2031542	0.00276271	0.001995079	0.003868038
1	1_197890422_C_G	197890422	0	72	G	C	0.951	-0.6310656	0.2031542	0.00276271	0.001995079	0.003868038
1	1_197890802_T_C	197890802	0	72	C	T	0.229	-0.2335543	0.09627215	0.01792535	0.01449756	0.01938916
1	1_198663346_G_A	198663346	0	72	A	G	0.042	0.5073119	0.2122565	0.01962093	0.01595449	0.02103784
1	1_198711170_CA_AA	198711170	0	72	AA	CA	0.083	-0.3531126	0.160961	0.03167296	0.02649364	0.03260704
1	1_200182664_C_T	200182664	0	72	T	C	0.458	-0.2076143	0.09587343	0.03386028	0.02843444	0.03468881
1	1_200378731_TGCC_T	200378731	0	72	T	TGCC	0.028	-0.5904108	0.2529258	0.02254022	0.01847978	0.02386091
1	1_200550262_G_A	200550262	0	72	A	G	0.25	0.289275	0.1028315	0.006408875	0.004872209	0.007848131
1	1_200559480_G_C	200559480	0	72	C	G	0.028	-0.6507891	0.2899234	0.02804477	0.0232915	0.02914456
1	1_200776641_C_T	200776641	0	72	T	C	0.09	0.3070001	0.1381028	0.02954449	0.02461241	0.03057737
1	1_200843307_T_TCCCG	200843307	0	72	TCCCG	T	0.069	0.3958988	0.1478602	0.009289417	0.00722258	0.01082197
1	1_200881480_CCATGTCTAGCT_C	200881480	0	72	C	CCATGTCTAGCT	0.146	-0.2444744	0.1116123	0.03192837	0.02671989	0.03285033
1	1_200958210_C_T	200958210	0	72	T	C	0.042	-0.5706207	0.2041071	0.006726031	0.005128333	0.008180575
1	1_200971526_T_TG	200971526	0	72	TG	T	0.042	-0.5706207	0.2041071	0.006726031	0.005128333	0.008180575
1	1_200972983_G_T	200972983	0	72	T	G	0.035	-0.5441785	0.2243185	0.01792811	0.01449993	0.01939186
1	1_200974888_C_T	200974888	0	72	T	C	0.035	-0.5441785	0.2243185	0.01792811	0.01449993	0.01939186
1	1_201035429_G_A	201035429	0	72	A	G	0.056	-0.3888365	0.1769999	0.03144522	0.02629201	0.03239008
1	1_201042618_G_A	201042618	0	72	A	G	0.389	-0.2407031	0.08784901	0.007840913	0.006034213	0.009338384
1	1_201047111_A_G	201047111	0	72	G	A	0.25	0.2651141	0.1000537	0.01000977	0.007817793	0.01155268
1	1_201052310_A_T	201052310	0	72	T	A	0.25	0.2651141	0.1000537	0.01000977	0.007817793	0.01155268
1	1_201052312_A_C	201052312	0	72	C	A	0.25	0.2651141	0.1000537	0.01000977	0.007817793	0.01155268
1	1_201052474_T_C	201052474	0	72	C	T	0.25	0.2651141	0.1000537	0.01000977	0.007817793	0.01155268
1	1_201052562_G_T	201052562	0	72	T	G	0.243	0.2580571	0.1046632	0.0162072	0.01302943	0.01771025
1	1_201437477_A_T	201437477	0	72	T	A	0.271	0.1927666	0.08938585	0.03457857	0.02907336	0.03537166
1	1_201688832_T_C	201688832	0	72	C	T	0.306	0.2148639	0.09387165	0.02519623	0.02079394	0.02641577
1	1_201749520_G_C	201749520	0	72	C	G	0.292	0.2526202	0.08927855	0.006121402	0.004640709	0.007545462
1	1_201752429_A_C	201752429	0	72	C	A	0.285	0.2516524	0.0920587	0.007978287	0.00614639	0.009480006
1	1_201816572_G_A	201816572	0	72	A	G	0.056	-0.4765249	0.1930807	0.01610744	0.01294446	0.01761248
1	1_201840059_GTTATT_G	201840059	0	72	G	GTTATT	0.944	0.4765249	0.1930807	0.01610744	0.01294446	0.01761248
1	1_201840210_T_C	201840210	0	72	C	T	0.035	-0.5461406	0.2262676	0.01849045	0.01498228	0.01993947
1	1_202172943_A_G	202172943	0	72	G	A	0.097	-0.3365425	0.1565395	0.03512402	0.02955904	0.03588996
1	1_202197161_C_T	202197161	0	72	T	C	0.326	0.2020542	0.09153198	0.03065874	0.0255963	0.03164043
1	1_202266547_C_T	202266547	0	72	T	C	0.625	0.2059619	0.08184122	0.0142133	0.01133714	0.01574917
1	1_202283667_A_G	202283667	0	72	G	A	0.451	0.1977373	0.08585154	0.02432937	0.02003703	0.02558316
1	1_202287206_T_C	202287206	0	72	C	T	0.604	0.209185	0.08468554	0.0160199	0.01286992	0.01752666
1	1_202287813_T_C	202287813	0	72	C	T	0.611	0.2270817	0.08492124	0.009377276	0.007295034	0.01091132
1	1_202288462_C_A	202288462	0	72	A	C	0.611	0.2270817	0.08492124	0.009377276	0.007295034	0.01091132
1	1_202409940_A_G	202409940	0	72	G	A	0.076	-0.4552371	0.2117345	0.03511181	0.02954816	0.03587836
1	1_202457784_T_A	202457784	0	72	A	T	0.431	0.1986695	0.08412971	0.02107424	0.01720912	0.02244546
1	1_202531741_C_T	202531741	0	72	T	C	0.431	0.1986695	0.08412971	0.02107424	0.01720912	0.02244546
1	1_202536848_C_T	202536848	0	72	T	C	0.438	0.1927228	0.08576467	0.02788188	0.02314827	0.02898879
1	1_202565948_G_A	202565948	0	72	A	G	0.292	-0.2033257	0.09398081	0.0340217	0.02857796	0.0348423
1	1_202572105_GCC_G	202572105	0	72	G	GCC	0.66	0.1928696	0.09006495	0.03582396	0.0301829	0.03655477
1	1_202822566_G_A	202822566	0	72	A	G	0.083	-0.3695571	0.1726805	0.03593536	0.03028227	0.03666056
1	1_203698691_G_A	203698691	0	72	A	G	0.028	0.5716923	0.2542574	0.02779025	0.02306772	0.02890114
1	1_203740508_C_T	203740508	0	72	T	C	0.035	-0.4617852	0.2144014	0.03480082	0.0292712	0.03558287
1	1_203740643_C_T	203740643	0	72	T	C	0.035	-0.4617852	0.2144014	0.03480082	0.0292712	0.03558287
1	1_204412777_G_A	204412777	0	72	A	G	0.021	-0.6594822	0.3031925	0.03310141	0.02776027	0.03396699
1	1_204416456_T_C	204416456	0	72	C	T	0.021	-0.6594822	0.3031925	0.03310141	0.02776027	0.03396699
1	1_204429838_C_G	204429838	0	72	G	C	0.882	0.3782287	0.1562855	0.01819322	0.01472722	0.01965013
1	1_204438334_C_T	204438334	0	72	T	C	0.819	0.3867573	0.1245861	0.002779097	0.002007642	0.003886935
1	1_204438643_G_T	204438643	0	72	T	G	0.819	0.3867573	0.1245861	0.002779097	0.002007642	0.003886935
1	1_204494756_GT_G	204494756	0	72	G	GT	0.16	-0.3516364	0.1210704	0.004959308	0.003711851	0.00630685
1	1_204889575_TC_T	204889575	0	72	T	TC	0.021	0.6795202	0.2971635	0.02533312	0.02091361	0.02654715
1	1_204978643_C_A	204978643	0	72	A	C	0.368	0.1891839	0.08672375	0.03261061	0.02732471	0.03349991
1	1_205069404_G_A	205069404	0	72	A	G	0.181	-0.2665056	0.1198373	0.02948007	0.02455558	0.03051587
1	1_205119981_C_T	205119981	0	72	T	C	0.174	-0.3052184	0.1212352	0.01417764	0.011307	0.01571396
1	1_205130413_A_G	205130413	0	72	G	A	0.944	-0.5197487	0.1842677	0.006276161	0.004765257	0.007708566
1	1_205239031_C_G	205239031	0	72	G	C	0.292	0.1979087	0.08880232	0.02914679	0.02426174	0.03019764
1	1_205240913_A_G	205240913	0	72	G	A	0.944	-0.5197487	0.1842677	0.006276161	0.004765257	0.007708566
1	1_205495889_GCT_G	205495889	0	72	G	GCT	0.042	-0.425718	0.1780927	0.01960421	0.01594009	0.02102162
1	1_205739382_G_A	205739382	0	72	A	G	0.042	0.4140138	0.1792649	0.02395908	0.01971417	0.02522715
1	1_205740474_G_GA	205740474	0	72	GA	G	0.042	0.4377829	0.1804808	0.01794042	0.01451048	0.01940385
1	1_205744138_G_T	205744138	0	72	T	G	0.375	-0.2226705	0.08817945	0.01390005	0.01107249	0.01543964
1	1_205779231_G_A	205779231	0	72	A	G	0.215	0.230676	0.09969491	0.02370703	0.01949458	0.02498469
1	1_205813677_T_C	205813677	0	72	C	T	0.938	0.4192064	0.1737353	0.0185273	0.01501391	0.01997533
1	1_205814485_G_A	205814485	0	72	A	G	0.236	0.2469201	0.09816344	0.01425778	0.01137474	0.01579309
1	1_205886253_G_A	205886253	0	72	A	G	0.042	-0.5705316	0.2055536	0.007110315	0.005439634	0.00858146
1	1_206317394_C_G	206317394	0	72	G	C	0.083	-0.3837859	0.1533168	0.01471377	0.01176067	0.01624285
1	1_206317568_G_A	206317568	0	72	A	G	0.083	-0.3837859	0.1533168	0.01471377	0.01176067	0.01624285
1	1_206765254_C_T	206765254	0	72	T	C	0.062	0.5403511	0.1779629	0.003393368	0.0024816	0.004585951
1	1_206766825_CGA_AGA	206766825	0	72	AGA	CGA	0.042	0.4510454	0.1880767	0.01922575	0.01561425	0.02065425
1	1_206856203_C_T	206856203	0	72	T	C	0.056	0.5010216	0.1716016	0.004748558	0.003544716	0.006079209
1	1_206856486_C_T	206856486	0	72	T	C	0.056	0.5010216	0.1716016	0.004748558	0.003544716	0.006079209
1	1_206905040_C_T	206905040	0	72	T	C	0.056	0.5010216	0.1716016	0.004748558	0.003544716	0.006079209
1	1_206944112_T_A	206944112	0	72	A	T	0.215	0.2526069	0.1039652	0.01775617	0.01435262	0.01922424
1	1_206972072_C_T	206972072	0	72	T	C	0.507	-0.165376	0.07326356	0.02720666	0.02255507	0.02834274
1	1_207014472_A_C	207014472	0	72	C	A	0.646	0.1973417	0.08363808	0.02117906	0.01729981	0.0225468
1	1_207015957_T_C	207015957	0	72	C	T	0.722	0.1891613	0.08808188	0.03531578	0.02972989	0.03607213
1	1_207132837_G_A	207132837	0	72	A	G	0.125	-0.3280221	0.1324109	0.01572844	0.01262192	0.01724072
1	1_207510860_G_A	207510860	0	72	A	G	0.062	0.4784917	0.1721407	0.007030939	0.005375249	0.00849882
1	1_207532861_CTTTTTTTTT_CTTTTTTTTTTTTTTTTT	207532861	0	72	CTTTTTTTTTTTTTTTTT	CTTTTTTTTT	0.021	-0.6307653	0.2940171	0.0355002	0.02989424	0.03624729
1	1_207782916_A_T	207782916	0	72	T	A	0.965	-0.5351192	0.2274474	0.02153732	0.01760997	0.02289303
1	1_207851611_A_G	207851611	0	72	G	A	0.458	-0.1981466	0.08722024	0.02626698	0.02173094	0.02744273
1	1_207934553_A_T	207934553	0	72	T	A	0.042	-0.5087089	0.2160599	0.02144322	0.01752847	0.02280212
1	1_208070936_C_T	208070936	0	72	T	C	0.028	-0.5902105	0.275378	0.03567164	0.03004708	0.03641012
1	1_208219545_T_C	208219545	0	72	C	T	0.076	-0.4077957	0.1695583	0.01889761	0.01533205	0.02033544
1	1_210591742_TG_T	210591742	0	72	T	TG	0.618	0.2107743	0.08344663	0.01387626	0.0110524	0.01541611
1	1_211380444_G_T	211380444	0	72	T	G	0.153	-0.2670773	0.1117995	0.01967967	0.0160051	0.02109483
1	1_211380445_C_T	211380445	0	72	T	C	0.16	-0.243102	0.1124002	0.03407421	0.02862465	0.03489223
1	1_211533990_A_G	211533990	0	72	G	A	0.153	-0.3538429	0.114214	0.002831027	0.002047482	0.003946724
1	1_211545442_CTT_CT	211545442	0	72	CT	CTT	0.139	0.3584923	0.1171928	0.003175723	0.00231302	0.004340224
1	1_211545458_TC_T	211545458	0	72	T	TC	0.188	-0.2646459	0.1208069	0.03190851	0.02670229	0.03283141
1	1_211654216_A_G	211654216	0	72	G	A	0.104	0.2936604	0.1368388	0.03544245	0.02984277	0.03619245
1	1_212870142_G_A	212870142	0	72	A	G	0.028	-0.5835701	0.2520479	0.02362019	0.01941895	0.02490113
1	1_213188876_G_C	213188876	0	72	C	G	0.035	-0.5236807	0.2285512	0.02504955	0.02066575	0.02627496
1	1_214542819_T_C	214542819	0	72	C	T	0.812	0.2802872	0.1114562	0.01428082	0.01139423	0.01581584
1	1_214551276_G_A	214551276	0	72	A	G	0.833	0.3120891	0.126069	0.0157997	0.01268253	0.01731066
1	1_214558228_A_G	214558228	0	72	G	A	0.84	0.3007437	0.1296174	0.02333599	0.01917156	0.02462759
1	1_214564340_T_C	214564340	0	72	C	T	0.84	0.3007437	0.1296174	0.02333599	0.01917156	0.02462759
1	1_214566952_A_G	214566952	0	72	G	A	0.84	0.3007437	0.1296174	0.02333599	0.01917156	0.02462759
1	1_214567013_CG_C	214567013	0	72	C	CG	0.84	0.3007437	0.1296174	0.02333599	0.01917156	0.02462759
1	1_215916683_AAG_A	215916683	0	72	A	AAG	0.097	-0.3383592	0.1450892	0.02266552	0.01858862	0.0239817
1	1_217604654_T_C	217604654	0	72	C	T	0.035	0.5355406	0.2275762	0.02150953	0.0175859	0.02286619
1	1_220145371_T_G	220145371	0	72	G	T	0.812	0.2904522	0.1138159	0.01296449	0.0102842	0.01451251
1	1_220153332_T_TAA	220153332	0	72	TAA	T	0.785	0.2811542	0.1050402	0.009311678	0.007240934	0.01084461
1	1_220154659_TAAAA_T	220154659	0	72	T	TAAAA	0.167	0.3264804	0.1223178	0.009502021	0.007397976	0.01103807
1	1_220156090_T_C	220156090	0	72	C	T	0.785	0.2811542	0.1050402	0.009311678	0.007240934	0.01084461
1	1_220197545_C_T	220197545	0	72	T	C	0.778	0.2276089	0.1044849	0.03284742	0.02753482	0.0337253
1	1_220205943_G_A	220205943	0	72	A	G	0.778	0.2276089	0.1044849	0.03284742	0.02753482	0.0337253
1	1_220208154_C_A	220208154	0	72	A	C	0.778	0.2276089	0.1044849	0.03284742	0.02753482	0.0337253
1	1_221509161_G_C	221509161	0	72	C	G	0.646	0.1903637	0.07654571	0.01534455	0.01229568	0.01686364
1	1_222647110_C_G	222647110	0	72	G	C	0.069	0.5429682	0.1660388	0.001689177	0.001183441	0.002591278
1	1_222802926_C_T	222802926	0	72	T	C	0.799	0.2889886	0.1008294	0.005525691	0.004163095	0.006913789
1	1_222825403_G_A	222825403	0	72	A	G	0.938	0.3565245	0.1454073	0.01678356	0.01352096	0.01827448
1	1_222825415_G_A	222825415	0	72	A	G	0.062	-0.3565245	0.1454073	0.01678356	0.01352096	0.01827448
1	1_222825761_G_A	222825761	0	72	A	G	0.938	0.3565245	0.1454073	0.01678356	0.01352096	0.01827448
1	1_222838216_C_T	222838216	0	72	T	C	0.938	0.3565245	0.1454073	0.01678356	0.01352096	0.01827448
1	1_223402440_G_T	223402440	0	72	T	G	0.028	0.499598	0.2237284	0.02884007	0.02399149	0.02990468
1	1_223722646_TA_T	223722646	0	72	T	TA	0.056	-0.5216499	0.210987	0.01592631	0.01279026	0.01743488
1	1_223722760_A_C	223722760	0	72	C	A	0.035	0.4951752	0.2280063	0.0333651	0.02799443	0.03421786
1	1_223724559_G_A	223724559	0	72	A	G	0.042	0.5083737	0.2096655	0.01798399	0.01454782	0.01944631
1	1_223816383_G_A	223816383	0	72	A	G	0.056	0.4031571	0.1865002	0.03416453	0.02870498	0.0349781
1	1_223830566_G_A	223830566	0	72	A	G	0.424	-0.2478358	0.09499838	0.01116125	0.008774464	0.01271264
1	1_223841913_C_A	223841913	0	72	A	C	0.431	-0.2299842	0.1008042	0.02565545	0.02119552	0.0268564
1	1_223932743_CAAAA_CA	223932743	0	72	CA	CAAAA	0.139	-0.2498848	0.1075109	0.0231056	0.01897113	0.02440573
1	1_224621309_T_C	224621309	0	72	C	T	0.424	-0.380454	0.1587832	0.01932928	0.01570335	0.02075478
1	1_225718469_T_C	225718469	0	72	C	T	0.021	-0.6398779	0.293123	0.03249415	0.02722141	0.03338905
1	1_225965803_C_A	225965803	0	72	A	C	0.208	0.2972443	0.1190984	0.01499862	0.01200211	0.01652338
1	1_225965832_G_T	225965832	0	72	T	G	0.181	-0.2502402	0.1046749	0.0195938	0.01593112	0.02101152
1	1_226044766_G_A	226044766	0	72	A	G	0.326	0.2169857	0.09057263	0.01934627	0.01571798	0.02077128
1	1_226053805_G_A	226053805	0	72	A	G	0.201	0.2599787	0.0923807	0.006389084	0.004856251	0.007827336
1	1_226054333_G_A	226054333	0	72	A	G	0.118	0.2644183	0.123255	0.03550364	0.02989731	0.03625056
1	1_226252283_CT_CTT	226252283	0	72	CTT	CT	0.056	0.40255	0.1864098	0.03434222	0.02886303	0.03514701
1	1_226411317_C_T	226411317	0	72	T	C	0.688	-0.2374246	0.08137537	0.004776099	0.003566532	0.006109017
1	1_226420722_A_G	226420722	0	72	G	A	0.417	-0.2216857	0.08137565	0.008185087	0.006315476	0.00969281
1	1_226474132_G_A	226474132	0	72	A	G	0.736	-0.2231549	0.08997792	0.01561577	0.01252612	0.01713011
1	1_226475580_G_T	226475580	0	72	T	G	0.042	0.642278	0.2582983	0.01535852	0.01230754	0.01687738
1	1_226485327_A_AT	226485327	0	72	AT	A	0.701	-0.2302502	0.08068365	0.005721141	0.004319473	0.007121742
1	1_227165097_G_A	227165097	0	72	A	G	0.243	-0.2234373	0.09338105	0.01949057	0.01584221	0.02091135
1	1_228404198_G_A	228404198	0	72	A	G	0.028	-0.5789734	0.254998	0.02634955	0.02180329	0.02752186
1	1_228432264_A_T	228432264	0	72	T	A	0.035	0.6499595	0.2285132	0.00587458	0.004442464	0.007284506
1	1_228464633_C_G	228464633	0	72	G	C	0.021	-0.6528946	0.301357	0.03377976	0.02836287	0.03461225
1	1_228466819_C_T	228466819	0	72	T	C	0.035	0.6499595	0.2285132	0.00587458	0.004442464	0.007284506
1	1_228593725_C_T	228593725	0	72	T	C	0.021	-0.6318792	0.2945624	0.03551599	0.02990832	0.0362623
1	1_230410162_C_T	230410162	0	72	T	C	0.181	-0.25598	0.1003971	0.01304166	0.0103491	0.01458914
1	1_230410342_G_A	230410342	0	72	A	G	0.035	-0.6086474	0.2674436	0.02601309	0.02150857	0.02719937
1	1_231047310_TAC_T	231047310	0	72	T	TAC	0.625	0.2429168	0.09279745	0.0109017	0.008558295	0.01245198
1	1_231057310_C_T	231057310	0	72	T	C	0.618	0.2321027	0.08967249	0.0117831	0.009293583	0.01333543
1	1_231059784_C_T	231059784	0	72	T	C	0.618	0.2321027	0.08967249	0.0117831	0.009293583	0.01333543
1	1_231069652_A_C	231069652	0	72	C	A	0.618	0.2321027	0.08967249	0.0117831	0.009293583	0.01333543
1	1_231092180_G_A	231092180	0	72	A	G	0.375	-0.2076452	0.08961872	0.02352348	0.01933474	0.02480806
1	1_231092211_T_TG	231092211	0	72	TG	T	0.375	-0.2076452	0.08961872	0.02352348	0.01933474	0.02480806
1	1_231320720_A_T	231320720	0	72	T	A	0.062	-0.3382169	0.1561254	0.03379566	0.028377	0.03462737
1	1_231323339_A_G	231323339	0	72	G	A	0.188	0.3258705	0.1100942	0.004232619	0.003137475	0.005517222
1	1_231334780_C_A	231334780	0	72	A	C	0.139	0.3001564	0.1245034	0.01862446	0.01509734	0.02006984
1	1_231336946_G_A	231336946	0	72	A	G	0.069	-0.370328	0.1489134	0.01534695	0.01229772	0.016866
1	1_231337031_C_A	231337031	0	72	A	C	0.201	0.32114	0.1105885	0.004966028	0.003717187	0.006314091
1	1_231337037_C_T	231337037	0	72	T	C	0.076	0.4206257	0.1598184	0.01049778	0.008222491	0.01204543
1	1_231339713_C_T	231339713	0	72	T	C	0.062	-0.3564114	0.1549868	0.02454587	0.02022592	0.02579121
1	1_231376806_G_C	231376806	0	72	C	G	0.062	0.3377117	0.1561477	0.0340786	0.02862855	0.0348964
1	1_232568268_C_T	232568268	0	72	T	C	0.021	0.679537	0.2971701	0.02533276	0.02091329	0.02654681
1	1_232575432_T_C	232575432	0	72	C	T	0.021	0.679537	0.2971701	0.02533276	0.02091329	0.02654681
1	1_233490764_G_T	233490764	0	72	T	G	0.285	-0.2593821	0.08804863	0.004406252	0.00327421	0.005707142
1	1_233490776_C_T	233490776	0	72	T	C	0.292	-0.246293	0.08878516	0.007140798	0.005464372	0.008613175
1	1_234519385_T_C	234519385	0	72	C	T	0.556	0.2084163	0.08947536	0.02282043	0.01872322	0.024131
1	1_234561590_T_A	234561590	0	72	A	T	0.278	-0.2058048	0.09402126	0.03203983	0.02681865	0.03295648
1	1_234573357_G_C	234573357	0	72	C	G	0.451	-0.2053496	0.08899796	0.02408606	0.01982485	0.02534925
1	1_234601296_T_C	234601296	0	72	C	T	0.049	-0.4631424	0.204842	0.02696456	0.02234259	0.02811097
1	1_236899042_G_A	236899042	0	72	A	G	0.097	0.4343967	0.1472019	0.004342007	0.003223579	0.005636969
1	1_236902594_C_G	236902594	0	72	G	C	0.833	-0.3025391	0.1153564	0.01075953	0.008440015	0.01230901
1	1_236958478_T_A	236958478	0	72	A	T	0.056	0.5079726	0.2038657	0.01515725	0.01213668	0.01667947
1	1_236958515_C_T	236958515	0	72	T	C	0.062	0.4185169	0.172754	0.01807844	0.01462879	0.01953834
1	1_236971983_C_T	236971983	0	72	T	C	0.035	0.6092778	0.2449733	0.01533705	0.01228931	0.01685627
1	1_237057608_G_A	237057608	0	72	A	G	0.507	-0.2022373	0.08754962	0.02393178	0.01969038	0.02520089
1	1_237058828_C_T	237058828	0	72	T	C	0.507	-0.2022373	0.08754962	0.02393178	0.01969038	0.02520089
1	1_237060850_T_C	237060850	0	72	C	T	0.104	0.4278429	0.146264	0.004675287	0.003486712	0.005999818
1	1_237061056_A_C	237061056	0	72	C	A	0.507	-0.2022373	0.08754962	0.02393178	0.01969038	0.02520089
1	1_237955649_CTGTGTGTGTG_CTGTGTG	237955649	0	72	CTGTGTG	CTGTGTGTGTG	0.354	-0.2012369	0.08249291	0.01732386	0.01398262	0.01880244
1	1_237955678_T_C	237955678	0	72	C	T	0.465	-0.2002642	0.08641803	0.02350015	0.01931443	0.0247856
1	1_237955680_TGC_CGC	237955680	0	72	CGC	TGC	0.382	-0.1739963	0.0722954	0.01881722	0.01526295	0.02025729
1	1_237957146_G_A	237957146	0	72	A	G	0.66	-0.2122577	0.08337377	0.01317233	0.01045905	0.01471883
1	1_237957161_A_G	237957161	0	72	G	A	0.674	-0.2363411	0.08158684	0.005067177	0.003797563	0.006422969
1	1_237957309_A_C	237957309	0	72	C	A	0.674	-0.2363411	0.08158684	0.005067177	0.003797563	0.006422969
1	1_241755567_T_C	241755567	0	72	C	T	0.111	-0.3214301	0.1478093	0.03314045	0.02779493	0.03400413
1	1_244754961_C_A	244754961	0	72	A	C	0.042	-0.4154588	0.1775435	0.02222417	0.01820543	0.0235561
1	1_244773803_T_C	244773803	0	72	C	T	0.729	0.2037814	0.09487266	0.03528405	0.02970161	0.03604198
1	1_244773862_T_C	244773862	0	72	C	T	0.729	0.2317793	0.09881444	0.02192048	0.01794201	0.02326304
1	1_245703819_T_C	245703819	0	72	C	T	0.444	0.2366974	0.08778266	0.008827556	0.006842378	0.01035113
1	1_245848996_G_A	245848996	0	72	A	G	0.028	0.6147234	0.2544627	0.01839382	0.01489933	0.01984543
1	1_245927199_T_C	245927199	0	72	C	T	0.042	-0.395658	0.1813783	0.03261501	0.02732861	0.0335041
1	1_247267269_C_T	247267269	0	72	T	C	0.028	-0.5885831	0.2526828	0.02281925	0.01872219	0.02412986
1	1_247582463_TATA_T	247582463	0	72	T	TATA	0.271	-0.2277878	0.1019385	0.02873605	0.02389987	0.0298053
1	1_247615261_GA_G	247615261	0	72	G	GA	0.424	-0.1845747	0.08004381	0.02417058	0.01989854	0.02543051
1	1_247654498_G_A	247654498	0	72	A	G	0.181	0.2288159	0.1031774	0.0299204	0.0249441	0.03093614
1	1_247835674_G_A	247835674	0	72	A	G	0.347	-0.2106567	0.08899511	0.02078297	0.01695726	0.02216372
1	1_247835908_T_A	247835908	0	72	A	T	0.347	-0.2106567	0.08899511	0.02078297	0.01695726	0.02216372
1	1_247836008_G_A	247836008	0	72	A	G	0.347	-0.2106567	0.08899511	0.02078297	0.01695726	0.02216372
1	1_247836207_T_A	247836207	0	72	A	T	0.347	-0.2106567	0.08899511	0.02078297	0.01695726	0.02216372
1	1_248058797_T_G	248058797	0	72	G	T	0.924	0.3443774	0.1457063	0.02096775	0.01711701	0.02234247
1	1_248084434_G_A	248084434	0	72	A	G	0.674	0.216449	0.09824552	0.03097612	0.02587692	0.03194301
1	1_248084863_C_T	248084863	0	72	T	C	0.049	-0.551301	0.2355798	0.02221603	0.01819837	0.02354825
1	1_248112915_A_G	248112915	0	72	G	A	0.271	0.1933385	0.090244	0.03574482	0.03011233	0.03647962
1	1_248128929_G_A	248128929	0	72	A	G	0.319	0.1886124	0.08568535	0.03111807	0.02600249	0.03207831
1	1_248167018_G_T	248167018	0	72	T	G	0.104	-0.4510273	0.1392619	0.001858591	0.001309833	0.00279893
1	1_248167067_C_G	248167067	0	72	G	C	0.125	-0.387188	0.1347496	0.00541368	0.004073624	0.006794281
1	1_248167072_T_G	248167072	0	72	G	T	0.104	-0.4510273	0.1392619	0.001858591	0.001309833	0.00279893
1	1_248167092_T_C	248167092	0	72	C	T	0.125	-0.387188	0.1347496	0.00541368	0.004073624	0.006794281
1	1_248167096_C_T	248167096	0	72	T	C	0.125	-0.387188	0.1347496	0.00541368	0.004073624	0.006794281
1	1_248167268_C_T	248167268	0	72	T	C	0.139	-0.3551934	0.1176833	0.003576907	0.002624274	0.0047917
1	1_248186128_CAAG_C	248186128	0	72	C	CAAG	0.049	-0.4337276	0.1946994	0.02921425	0.02432121	0.03026207
1	1_248202344_G_C	248202344	0	72	C	G	0.271	-0.3086701	0.1057787	0.004770285	0.003561927	0.006102727
1	1_248224294_C_T	248224294	0	72	T	C	0.257	-0.2872232	0.1227852	0.02226853	0.01824392	0.02359889
1	1_248224489_A_G	248224489	0	72	G	A	0.257	-0.2872232	0.1227852	0.02226853	0.01824392	0.02359889
1	1_248224746_G_T	248224746	0	72	T	G	0.062	-0.4426671	0.1817295	0.01748237	0.01411823	0.01895717
1	1_248224754_T_C	248224754	0	72	C	T	0.257	-0.2872232	0.1227852	0.02226853	0.01824392	0.02359889
1	1_248247778_A_C	248247778	0	72	C	A	0.028	0.6147912	0.2544839	0.01839081	0.01489674	0.0198425
1	1_248247784_C_T	248247784	0	72	T	C	0.104	0.3471496	0.1426528	0.01758588	0.01420682	0.01905816
1	1_248437078_T_C	248437078	0	72	C	T	0.028	0.6304412	0.2764042	0.02569458	0.02122976	0.02689393
1	1_248458443_G_A	248458443	0	72	A	G	0.035	-0.5435723	0.2387103	0.02592958	0.02143545	0.0271193
1	1_248458444_G_C	248458444	0	72	C	G	0.035	-0.5435723	0.2387103	0.02592958	0.02143545	0.0271193
1	1_248458496_G_A	248458496	0	72	A	G	0.028	0.6304412	0.2764042	0.02569458	0.02122976	0.02689393
1	1_248486895_G_T	248486895	0	72	T	G	0.736	-0.2469215	0.1014828	0.01760342	0.01422183	0.01907527
1	1_248487338_C_A	248487338	0	72	A	C	0.736	-0.2469215	0.1014828	0.01760342	0.01422183	0.01907527
1	1_248604465_C_T	248604465	0	72	T	C	0.625	-0.297921	0.1200686	0.01556979	0.01248704	0.01708496
1	1_248801538_G_A	248801538	0	72	A	G	0.201	0.186685	0.08493004	0.0313494	0.02620719	0.03229877
1	1_248801550_C_T	248801550	0	72	T	C	0.201	0.186685	0.08493004	0.0313494	0.02620719	0.03229877
1	1_248813224_A_C	248813224	0	72	C	A	0.035	-0.4253358	0.1910637	0.02932162	0.02441586	0.03036459
1	1_248814126_G_A	248814126	0	72	A	G	0.535	-0.332207	0.117332	0.00609126	0.004616474	0.00751365
1	1_249142169_C_T	249142169	0	72	T	C	0.049	-0.5318937	0.1912341	0.006997655	0.005348264	0.008464143
1	1_249144386_C_CA	249144386	0	72	CA	C	0.062	-0.4404785	0.1716958	0.01251386	0.00990568	0.0140644
1	1_249148399_C_T	249148399	0	72	T	C	0.076	0.4084408	0.1599369	0.01290308	0.01023257	0.0144515
1	1_249149747_T_C	249149747	0	72	C	T	0.132	-0.3146928	0.1274915	0.0160937	0.01293276	0.01759901
1	1_249150116_G_C	249150116	0	72	C	G	0.132	-0.3146928	0.1274915	0.0160937	0.01293276	0.01759901
1	1_249150205_C_T	249150205	0	72	T	C	0.132	-0.3146928	0.1274915	0.0160937	0.01293276	0.01759901
1	1_249208772_C_T	249208772	0	72	T	C	0.09	-0.3944666	0.1415995	0.006912821	0.005279519	0.008375688
2	2_905393_C_G	905393	0	72	G	C	0.09	0.2769195	0.1293719	0.03590419	0.03025446	0.03663096
2	2_1098891_A_G	1098891	0	72	G	A	0.535	0.2317896	0.1012568	0.02518311	0.02078247	0.02640317
2	2_1204561_T_C	1204561	0	72	C	T	0.271	0.2078566	0.09237092	0.02767262	0.02296435	0.02878863
2	2_1204570_G_A	1204570	0	72	A	G	0.181	0.2359869	0.1097809	0.03514643	0.029579	0.03591124
2	2_1855567_C_A	1855567	0	72	A	C	0.042	0.4474899	0.1795101	0.01511298	0.01209911	0.01663592
2	2_1926437_G_T	1926437	0	72	T	G	0.979	0.6474541	0.294052	0.03107259	0.02596226	0.03203497
2	2_3193040_G_A	3193040	0	72	A	G	0.326	0.2103164	0.08772123	0.0192569	0.01564106	0.02068451
2	2_3212247_G_T	3212247	0	72	T	G	0.528	-0.1845465	0.07897612	0.02240626	0.01836347	0.02373173
2	2_3212817_C_T	3212817	0	72	T	C	0.208	0.2423974	0.1002211	0.01826174	0.01478599	0.01971686
2	2_3260822_A_G	3260822	0	72	G	A	0.611	-0.1988138	0.08104191	0.01672723	0.01347287	0.01821938
2	2_3277947_T_A	3277947	0	72	A	T	0.542	-0.2183737	0.08255107	0.0101283	0.007915989	0.01167253
2	2_3356849_A_G	3356849	0	72	G	A	0.535	-0.2031118	0.0913247	0.02946832	0.02454522	0.03050466
2	2_3356850_T_C	3356850	0	72	C	T	0.215	0.3236112	0.1022374	0.002318449	0.001656316	0.003349823
2	2_3356995_G_A	3356995	0	72	A	G	0.222	0.3087148	0.1036186	0.00400278	0.002957	0.005264481
2	2_7076397_T_A	7076397	0	72	A	T	0.181	0.2711396	0.1128402	0.01900172	0.01542155	0.02043662
2	2_7130521_A_G	7130521	0	72	G	A	0.076	0.3805612	0.15906	0.01949959	0.01584998	0.0209201
2	2_7170517_G_T	7170517	0	72	T	G	0.083	0.3500132	0.1561538	0.02826347	0.02348387	0.02935365
2	2_7187199_A_G	7187199	0	72	G	A	0.104	0.4083079	0.1404919	0.004932965	0.003690936	0.006278452
2	2_7187209_C_G	7187209	0	72	G	C	0.111	0.3647937	0.1399455	0.01122531	0.008827863	0.01277691
2	2_7187397_CTA_C	7187397	0	72	C	CTA	0.111	0.3647937	0.1399455	0.01122531	0.008827863	0.01277691
2	2_7243449_AGTGTGTGT_AGT	7243449	0	72	AGT	AGTGTGTGT	0.458	-0.1994265	0.08967777	0.02948593	0.02456075	0.03052147
2	2_8910767_T_A	8910767	0	72	A	T	0.035	0.5412868	0.2255888	0.01916588	0.01556274	0.0205961
2	2_10564528_C_T	10564528	0	72	T	C	0.215	-0.2519715	0.1012256	0.01525495	0.0122196	0.01677555
2	2_11273407_GTC_G	11273407	0	72	G	GTC	0.236	0.3568369	0.1130876	0.002387964	0.00170908	0.003431719
2	2_11586698_T_C	11586698	0	72	C	T	0.042	-0.4822272	0.2111866	0.02553564	0.02109071	0.02674148
2	2_11733134_C_G	11733134	0	72	G	C	0.028	0.6142379	0.2543089	0.01841462	0.01491718	0.01986568
2	2_11767295_C_G	11767295	0	72	G	C	0.028	-0.5886419	0.2526905	0.02281018	0.01871431	0.02412112
2	2_11853963_C_T	11853963	0	72	T	C	0.097	0.4556377	0.1432678	0.002216387	0.001579021	0.003228976
2	2_11854012_G_A	11854012	0	72	A	G	0.139	-0.3711686	0.1213739	0.003184452	0.002319768	0.004350118
2	2_11907842_C_T	11907842	0	72	T	C	0.167	0.3632755	0.1078609	0.001249935	0.0008595575	0.002037176
2	2_11911761_C_T	11911761	0	72	T	C	0.125	0.3251411	0.1259921	0.0120243	0.009495379	0.01357637
2	2_11913727_CT_C	11913727	0	72	C	CT	0.243	0.2572033	0.1157861	0.02965887	0.0247133	0.03068655
2	2_11931773_G_T	11931773	0	72	T	G	0.042	0.5686633	0.2069607	0.007676904	0.005900439	0.009169023
2	2_12164120_C_T	12164120	0	72	T	C	0.056	0.410252	0.1837422	0.02886064	0.0240096	0.02992433
2	2_15493881_A_G	15493881	0	72	G	A	0.59	0.2950356	0.09580343	0.002989418	0.002169269	0.004128242
2	2_15523307_TA_T	15523307	0	72	T	TA	0.653	0.2250709	0.09296178	0.01814737	0.01468789	0.01960547
2	2_15533895_A_G	15533895	0	72	G	A	0.646	0.2356902	0.09202941	0.01265992	0.01002829	0.01420976
2	2_15607842_T_C	15607842	0	72	C	T	0.583	0.3250488	0.09562071	0.001133722	0.0007749433	0.001885791
2	2_15613715_G_A	15613715	0	72	A	G	0.653	0.2252457	0.09300091	0.0181079	0.01465405	0.01956704
2	2_15614404_T_C	15614404	0	72	C	T	0.66	0.211386	0.09508449	0.02953343	0.02460265	0.03056681
2	2_15615910_A_G	15615910	0	72	G	A	0.653	0.2250709	0.09296178	0.01814737	0.01468789	0.01960547
2	2_15616013_C_G	15616013	0	72	G	C	0.653	0.2250709	0.09296178	0.01814737	0.01468789	0.01960547
2	2_15616030_C_T	15616030	0	72	T	C	0.653	0.2250709	0.09296178	0.01814737	0.01468789	0.01960547
2	2_15644107_C_A	15644107	0	72	A	C	0.576	0.2596999	0.08326634	0.002661806	0.001917824	0.00375136
2	2_15644111_C_T	15644111	0	72	T	C	0.597	0.2086912	0.08466818	0.01623965	0.01305708	0.01774204
2	2_15674686_T_C	15674686	0	72	C	T	0.583	0.3341836	0.09099039	0.0004736854	0.0003066832	0.0009603933
2	2_15678368_C_T	15678368	0	72	T	C	0.653	0.2153912	0.09250739	0.02287378	0.01876958	0.02418241
2	2_15678482_T_C	15678482	0	72	C	T	0.653	0.2153912	0.09250739	0.02287378	0.01876958	0.02418241
2	2_15698614_T_C	15698614	0	72	C	T	0.035	-0.6202186	0.2560027	0.01807451	0.01462542	0.01953451
2	2_15744484_CT_C	15744484	0	72	C	CT	0.236	-0.2734236	0.102261	0.009383459	0.007300134	0.0109176
2	2_15747393_C_T	15747393	0	72	T	C	0.583	-0.1793609	0.08274125	0.03368312	0.02827697	0.03452034
2	2_15768981_C_G	15768981	0	72	G	C	0.333	0.1973886	0.09145132	0.03443016	0.02894128	0.0352306
2	2_16743453_A_C	16743453	0	72	C	A	0.528	-0.1943931	0.08916409	0.03270946	0.0274124	0.033594
2	2_17884495_C_T	17884495	0	72	T	C	0.326	-0.1882049	0.0833718	0.02719735	0.0225469	0.02833383
2	2_17889918_C_T	17889918	0	72	T	C	0.021	-0.6350964	0.2958371	0.03538073	0.02978777	0.03613383
2	2_17890091_G_GTATA	17890091	0	72	GTATA	G	0.368	-0.174934	0.08145535	0.03531223	0.02972672	0.03606875
2	2_18112314_C_T	18112314	0	72	T	C	0.021	-0.6298609	0.2928617	0.03505646	0.02949885	0.03582577
2	2_20202930_G_A	20202930	0	72	A	G	0.028	0.5467841	0.2535343	0.03457206	0.02906756	0.03536547
2	2_20234523_C_T	20234523	0	72	T	C	0.944	-0.441672	0.1896454	0.0228418	0.01874179	0.02415159
2	2_20317940_T_C	20317940	0	72	C	T	0.021	-0.6313778	0.29433	0.03551681	0.02990905	0.03626308
2	2_20866888_CG_C	20866888	0	72	C	CG	0.194	0.1693319	0.07242977	0.02234328	0.0183088	0.023671
2	2_21239595_A_G	21239595	0	72	G	A	0.042	0.5324772	0.2060802	0.01192379	0.009411258	0.01347601
2	2_21246306_G_C	21246306	0	72	C	G	0.16	-0.248251	0.1119803	0.02997597	0.02499315	0.03098916
2	2_21251040_T_G	21251040	0	72	G	T	0.868	0.3138405	0.1168765	0.009098231	0.007065057	0.0106273
2	2_21255573_C_CCATCT	21255573	0	72	CCATCT	C	0.868	0.3138405	0.1168765	0.009098231	0.007065057	0.0106273
2	2_21260136_G_A	21260136	0	72	A	G	0.021	-0.6830103	0.309377	0.03064237	0.02558183	0.03162481
2	2_24426534_A_G	24426534	0	72	G	A	0.021	-0.6312935	0.2942892	0.03551589	0.02990823	0.0362622
2	2_25375014_T_C	25375014	0	72	C	T	0.028	0.5458591	0.2510679	0.03317784	0.02782812	0.0340397
2	2_25375015_G_C	25375015	0	72	C	G	0.028	0.5458591	0.2510679	0.03317784	0.02782812	0.0340397
2	2_26507320_G_T	26507320	0	72	T	G	0.028	0.546363	0.2533735	0.03459586	0.02908874	0.03538809
2	2_27015301_C_T	27015301	0	72	T	C	0.056	-0.3998149	0.1724583	0.02344598	0.01926729	0.02473347
2	2_27424636_G_A	27424636	0	72	A	G	0.625	0.2077088	0.09266876	0.02826709	0.02348706	0.02935711
2	2_27440013_CT_C	27440013	0	72	C	CT	0.604	0.2111849	0.09020491	0.02216225	0.0181517	0.02349636
2	2_28268742_C_T	28268742	0	72	T	C	0.056	-0.4591559	0.1844574	0.01525424	0.012219	0.01677486
2	2_28718897_A_G	28718897	0	72	G	A	0.979	0.6426229	0.293438	0.0319594	0.02674738	0.03287988
2	2_29356669_A_G	29356669	0	72	G	A	0.458	-0.194396	0.08231201	0.0210622	0.01719871	0.02243382
2	2_29356728_T_C	29356728	0	72	C	T	0.257	-0.2284826	0.09375031	0.01742554	0.0140696	0.0189017
2	2_29420315_C_T	29420315	0	72	T	C	0.215	0.2469339	0.1103296	0.0284897	0.02368296	0.02956989
2	2_30986853_A_G	30986853	0	72	G	A	0.104	0.309895	0.1327788	0.02256275	0.01849935	0.02388263
2	2_31457981_T_C	31457981	0	72	C	T	0.674	0.1901079	0.08586254	0.0301784	0.02517189	0.0311823
2	2_31572732_C_T	31572732	0	72	T	C	0.076	-0.5372804	0.1607522	0.001353521	0.000935388	0.002170229
2	2_32390834_A_C	32390834	0	72	C	A	0.104	0.3104342	0.137205	0.02686146	0.02225213	0.02801224
2	2_33150678_C_T	33150678	0	72	T	C	0.486	-0.2082297	0.07198705	0.00512784	0.003845814	0.006488159
2	2_33500734_A_G	33500734	0	72	G	A	0.056	0.4108186	0.1839769	0.02884465	0.02399552	0.02990905
2	2_33526748_C_T	33526748	0	72	T	C	0.028	0.5467032	0.2535037	0.03457684	0.02907182	0.03537002
2	2_36740643_C_G	36740643	0	72	G	C	0.417	-0.1779599	0.08146774	0.03238261	0.0271225	0.03328287
2	2_37035866_G_T	37035866	0	72	T	G	0.083	-0.4553994	0.1897486	0.01913827	0.01553899	0.02056928
2	2_37486774_A_G	37486774	0	72	G	A	0.028	-0.6728359	0.2949211	0.02566068	0.0212001	0.02686142
2	2_38218281_T_C	38218281	0	72	C	T	0.09	-0.3708512	0.1529826	0.01800901	0.01456927	0.01947069
2	2_39008949_G_A	39008949	0	72	A	G	0.049	-0.4489102	0.1965405	0.02549579	0.02105586	0.02670324
2	2_39084292_A_G	39084292	0	72	G	A	0.215	0.2235935	0.09411682	0.02033987	0.0165745	0.02173476
2	2_42579743_T_C	42579743	0	72	C	T	0.139	-0.3290898	0.1271045	0.01175858	0.009273085	0.01331092
2	2_43514226_G_A	43514226	0	72	A	G	0.035	0.5901696	0.2324319	0.01340617	0.01065595	0.01495072
2	2_43518843_A_G	43518843	0	72	G	A	0.021	0.7431478	0.3186459	0.02265834	0.01858238	0.02397478
2	2_43571347_G_A	43571347	0	72	A	G	0.021	-0.6300201	0.292781	0.03496325	0.02941584	0.03573721
2	2_44004010_T_C	44004010	0	72	C	T	0.465	-0.2124916	0.09927572	0.03591033	0.03025994	0.03663679
2	2_44040347_T_C	44040347	0	72	C	T	0.021	-0.6473095	0.2940327	0.03109831	0.02598501	0.03205948
2	2_44054991_G_A	44054991	0	72	A	G	0.083	-0.354623	0.1395771	0.0133508	0.0106093	0.01489583
2	2_44055510_C_T	44055510	0	72	T	C	0.083	-0.2878303	0.1301938	0.0304178	0.02538337	0.03141066
2	2_44065090_G_A	44065090	0	72	A	G	0.09	-0.3659388	0.134773	0.008388146	0.006481752	0.009901326
2	2_44066247_G_C	44066247	0	72	C	G	0.083	-0.3419215	0.1401823	0.01733812	0.01399482	0.01881636
2	2_44073656_T_C	44073656	0	72	C	T	0.09	-0.3855566	0.1347164	0.005590175	0.004214651	0.006982477
2	2_44078853_G_A	44078853	0	72	A	G	0.083	-0.3548468	0.1395628	0.01328609	0.01055481	0.01483167
2	2_44079310_C_A	44079310	0	72	A	C	0.076	-0.3445716	0.1458016	0.02097883	0.0171266	0.02235319
2	2_44079606_G_A	44079606	0	72	A	G	0.056	-0.4730778	0.1820921	0.01148583	0.009045219	0.01303801
2	2_44079671_C_T	44079671	0	72	T	C	0.056	-0.4730778	0.1820921	0.01148583	0.009045219	0.01303801
2	2_44080242_A_G	44080242	0	72	G	A	0.056	-0.4730778	0.1820921	0.01148583	0.009045219	0.01303801
2	2_44080310_C_T	44080310	0	72	T	C	0.049	-0.4327601	0.1946446	0.02951963	0.02459048	0.03055364
2	2_44099057_A_G	44099057	0	72	G	A	0.056	-0.4730778	0.1820921	0.01148583	0.009045219	0.01303801
2	2_44100849_T_C	44100849	0	72	C	T	0.111	-0.4015206	0.1260149	0.002177011	0.001549258	0.003182151
2	2_44100871_G_A	44100871	0	72	A	G	0.097	-0.5178075	0.1268861	0.0001202369	7.143951e-05	0.0003515179
2	2_44101649_G_GCC	44101649	0	72	GCC	G	0.194	-0.2708676	0.1007136	0.00899432	0.006979524	0.01052136
2	2_44172636_T_C	44172636	0	72	C	T	0.097	-0.3273376	0.122769	0.009574576	0.007457887	0.01111174
2	2_44531484_C_T	44531484	0	72	T	C	0.597	0.1996984	0.08146938	0.0168133	0.01354635	0.01830356
2	2_44942384_C_G	44942384	0	72	G	C	0.688	-0.2030061	0.09041482	0.02800551	0.02325697	0.02910701
2	2_46609042_A_C	46609042	0	72	C	A	0.465	0.5454626	0.2243339	0.01767758	0.01428532	0.0191476
2	2_47238383_C_A	47238383	0	72	A	C	0.042	-0.4867547	0.2145394	0.02645618	0.02189675	0.02762404
2	2_47250819_A_G	47250819	0	72	G	A	0.403	0.1944357	0.08739179	0.02941106	0.02449472	0.03044999
2	2_47251555_G_T	47251555	0	72	T	G	0.125	0.3125367	0.1366101	0.02526457	0.02085367	0.02648136
2	2_48018314_T_A	48018314	0	72	A	T	0.271	0.2456767	0.08742264	0.006460375	0.004913748	0.007902217
2	2_48925746_C_T	48925746	0	72	T	C	0.812	-0.22942	0.1071238	0.03580852	0.03016914	0.03654012
2	2_50574485_A_G	50574485	0	72	G	A	0.278	0.2715743	0.09862904	0.007555714	0.005801699	0.009043677
2	2_54042132_CTTTTTTTTTT_TTTTTTTTTTT	54042132	1	71	TTTTTTTTTTT	CTTTTTTTTTT	0.063	0.4331308	0.1736821	0.01507507	0.01206696	0.01659862
2	2_54855859_CA_C	54855859	0	72	C	CA	0.021	-0.6465306	0.2939301	0.03123761	0.02610826	0.03219224
2	2_55476591_G_A	55476591	0	72	A	G	0.028	-0.5893318	0.2527817	0.0227042	0.01862222	0.02401898
2	2_55806912_G_A	55806912	0	72	A	G	0.062	0.3428993	0.1581258	0.03362062	0.02822144	0.0344609
2	2_55873385_C_G	55873385	0	72	G	C	0.188	0.2635549	0.109876	0.01920357	0.01559517	0.0206327
2	2_55874332_T_C	55874332	0	72	C	T	0.062	0.3428993	0.1581258	0.03362062	0.02822144	0.0344609
2	2_55874657_AT_ATT	55874657	0	72	ATT	AT	0.146	-0.2816654	0.1272742	0.03025313	0.0252379	0.03125359
2	2_59241468_A_G	59241468	0	72	G	A	0.028	-0.6795168	0.278773	0.01740842	0.01405496	0.01888499
2	2_61175312_T_C	61175312	0	72	C	T	0.625	0.1937137	0.08201731	0.02105347	0.01719115	0.02242537
2	2_61187478_CAAA_CAA	61187478	0	72	CAA	CAAA	0.056	-0.4744622	0.1841981	0.01217777	0.009623897	0.0137295
2	2_61189734_AT_A	61189734	0	72	A	AT	0.035	0.5121334	0.22952	0.02896019	0.02409731	0.03001943
2	2_61189740_TA_T	61189740	0	72	T	TA	0.035	-0.6115994	0.2255832	0.008480531	0.006557482	0.009996055
2	2_61304021_A_G	61304021	0	72	G	A	0.035	-0.5629451	0.2261513	0.01525358	0.01221844	0.01677421
2	2_61349451_G_C	61349451	0	72	C	G	0.042	-0.5696212	0.2040736	0.006809181	0.005195603	0.008267491
2	2_61384906_T_C	61384906	0	72	C	T	0.389	-0.2967025	0.0840266	0.0007481947	0.0004983986	0.001362752
2	2_61385100_G_A	61385100	0	72	A	G	0.361	-0.2745675	0.09694458	0.006076505	0.004604612	0.007498071
2	2_61385105_G_C	61385105	0	72	C	G	0.361	-0.2745675	0.09694458	0.006076505	0.004604612	0.007498071
2	2_61385248_A_G	61385248	0	72	G	A	0.396	-0.314922	0.08401159	0.0003693691	0.0002354598	0.0007964074
2	2_61389737_T_G	61389737	0	72	G	T	0.396	-0.314922	0.08401159	0.0003693691	0.0002354598	0.0007964074
2	2_61389799_G_A	61389799	0	72	A	G	0.361	-0.2745675	0.09694458	0.006076505	0.004604612	0.007498071
2	2_61415492_A_G	61415492	0	72	G	A	0.444	-0.2518923	0.08859116	0.005890816	0.00445549	0.007301704
2	2_61450454_A_G	61450454	0	72	G	A	0.542	0.2006641	0.08738681	0.02474765	0.02040206	0.02598505
2	2_61459803_T_A	61459803	0	72	A	T	0.035	-0.6115844	0.2255815	0.008481607	0.006558363	0.009997157
2	2_61552379_A_AT	61552379	0	72	AT	A	0.34	0.1732088	0.07952918	0.03288331	0.02756667	0.03375946
2	2_61605614_T_A	61605614	0	72	A	T	0.514	0.1954554	0.08573597	0.02576534	0.02129168	0.0269618
2	2_61633305_C_T	61633305	0	72	T	C	0.035	-0.6115844	0.2255815	0.008481607	0.006558363	0.009997157
2	2_61644329_C_G	61644329	0	72	G	C	0.556	0.261901	0.08857398	0.004269973	0.003166863	0.005558151
2	2_61648932_A_G	61648932	0	72	G	A	0.299	0.2566998	0.08402043	0.003211152	0.002340416	0.00438036
2	2_61729258_A_G	61729258	0	72	G	A	0.625	-0.2132977	0.09315283	0.02514415	0.02074842	0.02636577
2	2_61749690_C_T	61749690	0	72	T	C	0.639	-0.2227572	0.09514421	0.0221573	0.01814741	0.02349159
2	2_62449916_A_G	62449916	0	72	G	A	0.021	0.679902	0.2973107	0.02532377	0.02090543	0.02653817
2	2_62729653_A_G	62729653	0	72	G	A	0.111	-0.3011249	0.1203437	0.01475234	0.01179335	0.01628086
2	2_62733201_A_T	62733201	0	72	T	A	0.104	-0.2845475	0.1228026	0.02351612	0.01932834	0.02480098
2	2_63631889_A_C	63631889	0	72	C	A	0.403	-0.1925431	0.08189827	0.02162901	0.01768939	0.02298159
2	2_63660902_C_T	63660902	0	72	T	C	0.042	-0.46582	0.1791255	0.01140986	0.008981803	0.01296191
2	2_63719887_T_C	63719887	0	72	C	T	0.167	-0.253806	0.1070159	0.02054574	0.01675228	0.02193412
2	2_63815206_A_G	63815206	0	72	G	A	0.153	-0.2503067	0.1084297	0.0240202	0.01976744	0.02528592
2	2_65245889_G_A	65245889	0	72	A	G	0.035	-0.6777442	0.2273432	0.003981907	0.00294064	0.005241448
2	2_65325265_A_G	65325265	0	72	G	A	0.083	0.4177984	0.1520143	0.007661611	0.005887973	0.009153215
2	2_65593439_A_AAACAACAACAAC	65593439	0	72	AAACAACAACAAC	A	0.257	-0.2103606	0.08556337	0.01650209	0.01328079	0.01799907
2	2_66664751_C_T	66664751	0	72	T	C	0.042	0.5434232	0.2521287	0.03467819	0.02916203	0.03546634
2	2_67624779_C_T	67624779	0	72	T	C	0.035	-0.5218379	0.228297	0.02538889	0.02096237	0.02660067
2	2_68274510_CA_C	68274510	0	72	C	CA	0.243	-0.3349363	0.1127408	0.004101757	0.003034645	0.005373515
2	2_68366056_G_A	68366056	0	72	A	G	0.028	-0.6711107	0.2605341	0.0121753	0.009621832	0.01372705
2	2_68374576_G_A	68374576	0	72	A	G	0.028	-0.6711107	0.2605341	0.0121753	0.009621832	0.01372705
2	2_68388946_T_C	68388946	0	72	C	T	0.035	0.640969	0.239954	0.009448516	0.007353813	0.01098372
2	2_68389260_G_T	68389260	0	72	T	G	0.028	-0.6711107	0.2605341	0.0121753	0.009621832	0.01372705
2	2_69614161_A_G	69614161	0	72	G	A	0.618	0.1769229	0.08259396	0.03577122	0.03013588	0.03650469
2	2_69650730_G_A	69650730	0	72	A	G	0.028	-0.5906809	0.2529621	0.0224995	0.01844442	0.02382164
2	2_69736561_A_G	69736561	0	72	G	A	0.028	-0.5906809	0.2529621	0.0224995	0.01844442	0.02382164
2	2_70457813_C_T	70457813	0	72	T	C	0.021	0.6855707	0.2954772	0.02333744	0.01917282	0.02462898
2	2_70519841_GAACT_G	70519841	0	72	G	GAACT	0.035	0.4662466	0.214607	0.03330233	0.02793868	0.03415814
2	2_70933659_T_A	70933659	0	72	A	T	0.354	-0.1940319	0.08923069	0.03315059	0.02780393	0.03401378
2	2_71004413_CAA_CA	71004413	0	72	CA	CAA	0.139	-0.2859823	0.1290634	0.03005391	0.02506196	0.03106353
2	2_71047009_CCA_C	71047009	0	72	C	CCA	0.035	0.468944	0.2068645	0.02657967	0.022005	0.02774235
2	2_73188221_CCCCTG_C	73188221	0	72	C	CCCCTG	0.139	0.4842878	0.1622958	0.003949515	0.002915263	0.005205677
2	2_73188422_G_C	73188422	0	72	C	G	0.097	0.3970191	0.1534217	0.01180093	0.00930849	0.01335325
2	2_73250396_A_G	73250396	0	72	G	A	0.028	0.6345599	0.2643412	0.01911329	0.0155175	0.02054502
2	2_74159530_C_T	74159530	0	72	T	C	0.056	0.4201285	0.1891958	0.0297132	0.02476124	0.03073841
2	2_74159734_T_C	74159734	0	72	C	T	0.056	0.4201285	0.1891958	0.0297132	0.02476124	0.03073841
2	2_74159925_G_A	74159925	0	72	A	G	0.056	0.4201285	0.1891958	0.0297132	0.02476124	0.03073841
2	2_74185876_A_T	74185876	0	72	T	A	0.625	0.1955265	0.08505392	0.02459216	0.02026632	0.02583568
2	2_74362034_G_A	74362034	0	72	A	G	0.062	-0.4521355	0.1891509	0.01960849	0.01594378	0.02102578
2	2_74362039_G_C	74362039	0	72	C	G	0.062	-0.4521355	0.1891509	0.01960849	0.01594378	0.02102578
2	2_74642044_G_A	74642044	0	72	A	G	0.021	-0.641123	0.293262	0.03224828	0.0270034	0.03315497
2	2_79349372_C_G	79349372	0	72	G	C	0.382	-0.210593	0.08863045	0.02032068	0.01655793	0.02171618
2	2_79423062_TTTTG_T	79423062	0	72	T	TTTTG	0.132	0.2939671	0.1350622	0.03299186	0.02766301	0.03386275
2	2_80620370_T_C	80620370	0	72	C	T	0.028	0.6418513	0.2784366	0.02421344	0.01993592	0.02547172
2	2_80646849_T_G	80646849	0	72	G	T	0.049	0.5837065	0.2351041	0.0155099	0.01243614	0.01702612
2	2_84668258_TA_T	84668258	0	72	T	TA	0.076	-0.3510994	0.1606294	0.03227924	0.02703085	0.03318445
2	2_85533227_G_A	85533227	0	72	A	G	0.049	0.4317223	0.1946306	0.02988688	0.02491452	0.03090416
2	2_85617058_C_T	85617058	0	72	T	C	0.056	0.4358101	0.1857262	0.0218707	0.01789885	0.02321498
2	2_85617327_C_T	85617327	0	72	T	C	0.056	0.4358101	0.1857262	0.0218707	0.01789885	0.02321498
2	2_85617579_C_T	85617579	0	72	T	C	0.056	0.4358101	0.1857262	0.0218707	0.01789885	0.02321498
2	2_85617913_G_T	85617913	0	72	T	G	0.056	0.4358101	0.1857262	0.0218707	0.01789885	0.02321498
2	2_85618138_TCAGTGGAGC_T	85618138	0	72	T	TCAGTGGAGC	0.056	0.4358101	0.1857262	0.0218707	0.01789885	0.02321498
2	2_85618171_G_A	85618171	0	72	A	G	0.056	0.4358101	0.1857262	0.0218707	0.01789885	0.02321498
2	2_85626454_C_A	85626454	0	72	A	C	0.056	0.4358101	0.1857262	0.0218707	0.01789885	0.02321498
2	2_85628745_C_T	85628745	0	72	T	C	0.056	0.4358101	0.1857262	0.0218707	0.01789885	0.02321498
2	2_85776966_C_A	85776966	0	72	A	C	0.028	-0.6472518	0.2538362	0.01303467	0.01034322	0.0145822
2	2_85823632_C_T	85823632	0	72	T	C	0.097	0.3901153	0.1576229	0.01582204	0.01270153	0.01733258
2	2_85824073_T_C	85824073	0	72	C	T	0.097	0.3901153	0.1576229	0.01582204	0.01270153	0.01733258
2	2_85824251_T_C	85824251	0	72	C	T	0.097	0.3901153	0.1576229	0.01582204	0.01270153	0.01733258
2	2_85890753_A_G	85890753	0	72	G	A	0.153	0.2419976	0.112618	0.03521066	0.02963622	0.03597227
2	2_85890771_T_G	85890771	0	72	G	T	0.903	-0.3014343	0.1286371	0.02204617	0.01805101	0.02338435
2	2_86564490_C_A	86564490	0	72	A	C	0.049	-0.5835513	0.242345	0.01876064	0.01521433	0.02020228
2	2_86565371_A_G	86565371	0	72	G	A	0.097	-0.485435	0.2169831	0.02855453	0.02374004	0.02963185
2	2_87355912_C_T	87355912	0	72	T	C	0.257	0.2503074	0.1152775	0.03339777	0.02802345	0.03424893
2	2_87365639_T_C	87365639	0	72	C	T	0.062	-0.5073566	0.1798279	0.006263453	0.004755022	0.007695188
2	2_87616737_T_C	87616737	0	72	C	T	0.569	0.4572205	0.1627438	0.006474189	0.004924893	0.007916717
2	2_88402651_C_A	88402651	0	72	A	C	0.028	0.5460833	0.2532642	0.03460996	0.0291013	0.0354015
2	2_88409719_A_AGT	88409719	0	72	AGT	A	0.083	-0.4080842	0.1520471	0.009130175	0.007091363	0.01065985
2	2_88485392_G_C	88485392	0	72	C	G	0.854	0.2372194	0.1072377	0.03032309	0.0252997	0.03132032
2	2_88748390_A_T	88748390	0	72	T	A	0.542	-0.3176547	0.07856676	0.0001369381	8.203059e-05	0.000385613
2	2_89156948_C_G	89156948	0	72	G	C	0.132	0.3924609	0.1215071	0.001908577	0.001347263	0.002859666
2	2_89157282_T_A	89157282	0	72	A	T	0.132	0.3924609	0.1215071	0.001908577	0.001347263	0.002859666
2	2_89160889_G_T	89160889	0	72	T	G	0.375	0.2744601	0.09542323	0.00537034	0.004039035	0.006747973
2	2_89161322_C_G	89161322	0	72	G	C	0.396	0.206262	0.09216411	0.02850078	0.02369272	0.02958048
2	2_89339775_G_C	89339775	0	72	C	G	0.021	-0.6409469	0.2932419	0.0322827	0.02703392	0.03318775
2	2_89345969_G_A	89345969	0	72	A	G	0.028	-0.6129288	0.2809918	0.03262207	0.02733488	0.03351082
2	2_90008292_G_A	90008292	0	72	A	G	0.028	-0.6129288	0.2809918	0.03262207	0.02733488	0.03351082
2	2_90077866_C_A	90077866	0	72	A	C	0.028	-0.6129288	0.2809918	0.03262207	0.02733488	0.03351082
2	2_90122091_A_T	90122091	0	72	T	A	0.028	-0.6129288	0.2809918	0.03262207	0.02733488	0.03351082
2	2_90139597_C_A	90139597	0	72	A	C	0.028	-0.6129288	0.2809918	0.03262207	0.02733488	0.03351082
2	2_90154255_G_A	90154255	0	72	A	G	0.056	-0.4143832	0.183318	0.02699797	0.0223719	0.02814295
2	2_90249424_C_A	90249424	0	72	A	C	0.028	-0.6129288	0.2809918	0.03262207	0.02733488	0.03351082
2	2_95766599_C_T	95766599	0	72	T	C	0.035	-0.5241426	0.2286157	0.02496573	0.02059252	0.02619448
2	2_95824624_G_T	95824624	0	72	T	G	0.028	0.7089459	0.2589437	0.007886621	0.006071524	0.009385529
2	2_96048879_A_C	96048879	0	72	C	A	0.028	0.5444897	0.2510687	0.03360749	0.02820977	0.03444841
2	2_96551974_A_G	96551974	0	72	G	A	0.201	0.2355853	0.09516573	0.01580033	0.01268306	0.01731128
2	2_96617029_GA_G	96617029	0	72	G	GA	0.125	-0.4347882	0.1290952	0.001250066	0.000859653	0.002037345
2	2_96617237_TAACAGG_T	96617237	0	72	T	TAACAGG	0.062	-0.4518432	0.1892349	0.01973685	0.01605437	0.0211503
2	2_96646293_T_C	96646293	0	72	C	T	0.069	-0.3895695	0.1662286	0.02203063	0.01803753	0.02336935
2	2_96681081_C_T	96681081	0	72	T	C	0.222	0.2099934	0.08830807	0.02022528	0.01647559	0.02162377
2	2_96685021_A_G	96685021	0	72	G	A	0.243	0.188088	0.08787891	0.03591957	0.03026818	0.03664556
2	2_96687426_CT_C	96687426	0	72	C	CT	0.785	0.2639395	0.1118731	0.0211894	0.01730876	0.0225568
2	2_96687428_GC_G	96687428	0	72	G	GC	0.785	0.2639395	0.1118731	0.0211894	0.01730876	0.0225568
2	2_96688929_G_A	96688929	0	72	A	G	0.125	0.354834	0.1374139	0.01197438	0.009453592	0.01352653
2	2_96944553_G_A	96944553	0	72	A	G	0.25	0.2004768	0.09073929	0.03052025	0.0254739	0.03150836
2	2_99294714_T_A	99294714	0	72	A	T	0.028	-0.6639589	0.254718	0.01122649	0.008828849	0.01277809
2	2_99766943_C_T	99766943	0	72	T	C	0.028	-0.5712374	0.2511101	0.0260731	0.02156112	0.0272569
2	2_100017905_G_GAA	100017905	0	72	GAA	G	0.028	0.6314239	0.2638298	0.01946361	0.015819	0.02088518
2	2_100168258_T_A	100168258	0	72	A	T	0.042	0.5238019	0.2068593	0.01365065	0.01086204	0.01519288
2	2_100623286_G_A	100623286	0	72	A	G	0.028	-0.6168932	0.2819502	0.03211323	0.02688369	0.03302637
2	2_101889306_A_G	101889306	0	72	G	A	0.41	0.1971329	0.08248975	0.01963583	0.01596733	0.0210523
2	2_101889938_CTTT_TTTT	101889938	0	72	TTTT	CTTT	0.097	-0.3473129	0.1454925	0.01976579	0.01607931	0.02117836
2	2_101911385_A_G	101911385	0	72	G	A	0.41	0.1971329	0.08248975	0.01963583	0.01596733	0.0210523
2	2_102645013_G_GT	102645013	0	72	GT	G	0.056	0.4101762	0.1826044	0.0279395	0.02319893	0.02904389
2	2_105923971_G_A	105923971	0	72	A	G	0.028	0.5463949	0.2533858	0.03459416	0.02908723	0.03538647
2	2_106013216_T_C	106013216	0	72	C	T	0.653	-0.1790981	0.0822343	0.03288548	0.02756859	0.03376152
2	2_107007576_A_T	107007576	0	72	T	A	0.521	-0.1772742	0.08189604	0.03393036	0.02849674	0.03475545
2	2_107008058_A_G	107008058	0	72	G	A	0.535	-0.194958	0.08609891	0.02674522	0.02215017	0.02790092
2	2_107032153_AGGC_A	107032153	0	72	A	AGGC	0.069	0.3746819	0.1703601	0.03125651	0.02612498	0.03221025
2	2_107039737_G_A	107039737	0	72	A	G	0.035	0.4996547	0.2306538	0.03380055	0.02838134	0.03463201
2	2_107107302_C_T	107107302	0	72	T	C	0.125	0.3186977	0.1376145	0.02358785	0.01939079	0.02487001
2	2_107423626_C_A	107423626	0	72	A	C	0.028	-0.582484	0.2519184	0.02380186	0.01957718	0.02507593
2	2_107429801_C_T	107429801	0	72	T	C	0.646	-0.2288125	0.08231342	0.007028684	0.00537342	0.008496471
2	2_107450589_C_T	107450589	0	72	T	C	0.229	0.282553	0.09375478	0.003623633	0.002660667	0.004843878
2	2_108473387_A_G	108473387	0	72	G	A	0.035	-0.5436366	0.2243421	0.01804963	0.01460409	0.01951027
2	2_108475928_C_T	108475928	0	72	T	C	0.125	0.3442822	0.133393	0.01201437	0.009487067	0.01356646
2	2_108486338_G_T	108486338	0	72	T	G	0.062	0.3945095	0.1791861	0.03108448	0.02597278	0.0320463
2	2_108618146_GA_AA	108618146	0	72	AA	GA	0.167	-0.3044328	0.09680802	0.002465366	0.001767941	0.003522534
2	2_108618514_C_T	108618514	0	72	T	C	0.132	-0.4407488	0.1156093	0.0002989179	0.0001880451	0.0006803133
2	2_108618540_G_A	108618540	0	72	A	G	0.375	-0.1975115	0.07711148	0.01264848	0.01001868	0.01419838
2	2_109276099_G_A	109276099	0	72	A	G	0.132	-0.2717112	0.1224973	0.0298913	0.02491842	0.03090838
2	2_110849222_G_A	110849222	0	72	A	G	0.035	0.5449091	0.2345585	0.02317092	0.01902795	0.02446864
2	2_110922226_G_A	110922226	0	72	A	G	0.028	0.6564186	0.2810115	0.02245192	0.01840311	0.02377576
2	2_112551673_G_A	112551673	0	72	A	G	0.403	0.1946179	0.08539555	0.02581043	0.02133114	0.02700504
2	2_112614513_G_GTT	112614513	0	72	GTT	G	0.021	-0.6466913	0.2939511	0.03120876	0.02608273	0.03216475
2	2_112615933_T_C	112615933	0	72	C	T	0.042	0.5001026	0.2095206	0.01977882	0.01609055	0.021191
2	2_112782675_G_A	112782675	0	72	A	G	0.035	0.49988	0.230732	0.03378128	0.02836421	0.03461369
2	2_112821880_A_G	112821880	0	72	G	A	0.215	0.2256126	0.102157	0.03058448	0.02553066	0.03156962
2	2_112854584_A_G	112854584	0	72	G	A	0.125	0.2937345	0.1367459	0.03527706	0.02969538	0.03603534
2	2_113191010_A_C	113191010	0	72	C	A	0.153	0.3748211	0.1279501	0.00461844	0.003441748	0.005938131
2	2_113243799_T_A	113243799	0	72	A	T	0.181	0.2714355	0.1144478	0.02054412	0.01675088	0.02193255
2	2_113309653_C_A	113309653	0	72	A	C	0.125	0.3273397	0.135955	0.01877153	0.01522369	0.02021287
2	2_113513825_T_C	113513825	0	72	C	T	0.951	0.4347057	0.1947739	0.02892376	0.0240652	0.02998462
2	2_113514159_T_A	113514159	0	72	A	T	0.076	-0.3582664	0.1496989	0.01946623	0.01582126	0.02088773
2	2_113514180_T_C	113514180	0	72	C	T	0.076	-0.3582664	0.1496989	0.01946623	0.01582126	0.02088773
2	2_113514763_T_C	113514763	0	72	C	T	0.049	-0.4347057	0.1947739	0.02892376	0.0240652	0.02998462
2	2_113670415_T_A	113670415	0	72	A	T	0.097	0.3693951	0.1454317	0.0133754	0.01063003	0.01492022
2	2_113670437_A_T	113670437	0	72	T	A	0.097	0.3693951	0.1454317	0.0133754	0.01063003	0.01492022
2	2_113670475_A_G	113670475	0	72	G	A	0.097	0.3693951	0.1454317	0.0133754	0.01063003	0.01492022
2	2_113670481_G_C	113670481	0	72	C	G	0.097	0.3693951	0.1454317	0.0133754	0.01063003	0.01492022
2	2_113670709_G_GT	113670709	0	72	GT	G	0.097	0.3693951	0.1454317	0.0133754	0.01063003	0.01492022
2	2_113671198_T_C	113671198	0	72	C	T	0.097	0.3693951	0.1454317	0.0133754	0.01063003	0.01492022
2	2_113672568_A_G	113672568	0	72	G	A	0.09	0.3553592	0.1513414	0.02178721	0.01782648	0.02313437
2	2_113672665_A_G	113672665	0	72	G	A	0.097	0.3693951	0.1454317	0.0133754	0.01063003	0.01492022
2	2_113672666_C_T	113672666	0	72	T	C	0.097	0.3693951	0.1454317	0.0133754	0.01063003	0.01492022
2	2_113672890_C_T	113672890	0	72	T	C	0.097	0.3693951	0.1454317	0.0133754	0.01063003	0.01492022
2	2_113674709_C_G	113674709	0	72	G	C	0.097	0.3693951	0.1454317	0.0133754	0.01063003	0.01492022
2	2_113674721_A_G	113674721	0	72	G	A	0.097	0.3693951	0.1454317	0.0133754	0.01063003	0.01492022
2	2_113674887_G_T	113674887	0	72	T	G	0.09	0.3363046	0.1520469	0.03034063	0.0253152	0.03133706
2	2_113675269_C_T	113675269	0	72	T	C	0.097	0.3693951	0.1454317	0.0133754	0.01063003	0.01492022
2	2_113675428_G_A	113675428	0	72	A	G	0.097	0.3693951	0.1454317	0.0133754	0.01063003	0.01492022
2	2_113676219_T_C	113676219	0	72	C	T	0.097	0.3693951	0.1454317	0.0133754	0.01063003	0.01492022
2	2_113676381_G_A	113676381	0	72	A	G	0.097	0.3693951	0.1454317	0.0133754	0.01063003	0.01492022
2	2_113830173_C_T	113830173	0	72	T	C	0.153	0.27239	0.1232953	0.03052921	0.02548181	0.0315169
2	2_114215485_G_A	114215485	0	72	A	G	0.111	0.3731795	0.1309174	0.005773428	0.004361362	0.007177255
2	2_114257555_T_C	114257555	0	72	C	T	0.035	0.5395584	0.2253946	0.01943731	0.01579635	0.02085966
2	2_114355960_A_G	114355960	0	72	G	A	0.09	0.3618609	0.1510458	0.01934659	0.01571826	0.02077159
2	2_114357862_C_T	114357862	0	72	T	C	0.41	-0.1963029	0.08243696	0.02005995	0.01633294	0.02146356
2	2_114358139_TA_T	114358139	0	72	T	TA	0.41	-0.1963029	0.08243696	0.02005995	0.01633294	0.02146356
2	2_114369646_C_A	114369646	0	72	A	C	0.611	-0.1681955	0.07116502	0.02097012	0.01711906	0.02234476
2	2_114492135_C_T	114492135	0	72	T	C	0.556	-0.1903437	0.08886399	0.03578074	0.03014436	0.03651373
2	2_114493524_C_T	114493524	0	72	T	C	0.556	-0.1903437	0.08886399	0.03578074	0.03014436	0.03651373
2	2_114501242_T_C	114501242	0	72	C	T	0.243	-0.2264823	0.09594301	0.02112017	0.01724886	0.02248987
2	2_114513386_C_T	114513386	0	72	T	C	0.556	-0.1903437	0.08886399	0.03578074	0.03014436	0.03651373
2	2_116066984_G_A	116066984	0	72	A	G	0.819	0.2666577	0.1071261	0.01525541	0.01222	0.01677601
2	2_118851442_G_T	118851442	0	72	T	G	0.507	-0.2708578	0.08993628	0.003645583	0.002677774	0.004868363
2	2_120059921_C_A	120059921	0	72	A	C	0.236	-0.2046017	0.09330268	0.03174032	0.0265533	0.03267121
2	2_120125973_G_C	120125973	0	72	C	G	0.229	-0.2211417	0.09415439	0.02175215	0.0177961	0.02310052
2	2_120388412_G_A	120388412	0	72	A	G	0.944	0.5225614	0.2055991	0.01331756	0.01058131	0.01486288
2	2_120409430_A_G	120409430	0	72	G	A	0.944	0.5225614	0.2055991	0.01331756	0.01058131	0.01486288
2	2_120690217_G_A	120690217	0	72	A	G	0.139	0.3286272	0.1361312	0.01847391	0.01496807	0.01992337
2	2_120889173_G_C	120889173	0	72	C	G	0.576	0.2326523	0.09477248	0.01665792	0.01341373	0.01815158
2	2_125281910_C_T	125281910	0	72	T	C	0.042	-0.4951868	0.2143088	0.02389367	0.01965718	0.02516424
2	2_127839534_T_C	127839534	0	72	C	T	0.167	-0.2688908	0.120249	0.02862893	0.02380554	0.02970295
2	2_127951371_C_T	127951371	0	72	T	C	0.028	0.5435031	0.2511804	0.03399656	0.0285556	0.03481839
2	2_128079806_A_G	128079806	0	72	G	A	0.271	0.1888281	0.08733397	0.03412921	0.02867357	0.03494452
2	2_128176040_A_T	128176040	0	72	T	A	0.444	0.1702488	0.07804495	0.03261326	0.02732706	0.03350243
2	2_128263337_T_A	128263337	0	72	A	T	0.083	-0.3702561	0.1546414	0.01941537	0.01577746	0.02083836
2	2_128367092_G_A	128367092	0	72	A	G	0.326	0.2549465	0.09039205	0.006279056	0.004767588	0.007711614
2	2_128369896_A_G	128369896	0	72	G	A	0.604	0.1990721	0.08508128	0.02223803	0.01821746	0.02356947
2	2_128377833_C_G	128377833	0	72	G	C	0.604	0.1990721	0.08508128	0.02223803	0.01821746	0.02356947
2	2_128386120_TGGGTG_T	128386120	0	72	T	TGGGTG	0.153	0.1884577	0.08065145	0.02240876	0.01836564	0.02373415
2	2_128392647_G_T	128392647	0	72	T	G	0.16	0.2605333	0.1132029	0.0244353	0.02012943	0.02568496
2	2_128396807_A_G	128396807	0	72	G	A	0.528	0.19976	0.08254505	0.01819786	0.0147312	0.01965465
2	2_128400783_G_A	128400783	0	72	A	G	0.528	0.2078319	0.07459022	0.006902788	0.005271392	0.00836522
2	2_128401091_A_G	128401091	0	72	G	A	0.639	0.2274372	0.08570256	0.009900965	0.007727725	0.01144258
2	2_128474887_C_T	128474887	0	72	T	C	0.139	0.3000335	0.1262476	0.02029694	0.01653744	0.02169318
2	2_128528508_C_T	128528508	0	72	T	C	0.062	-0.5813945	0.1705099	0.00109754	0.0007487048	0.001838154
2	2_128608270_G_A	128608270	0	72	A	G	0.028	-0.6480403	0.2544469	0.01313793	0.01043009	0.0146847
2	2_130738329_C_A	130738329	0	72	A	C	0.049	0.6698413	0.239081	0.006614355	0.005038064	0.008063687
2	2_130832170_C_G	130832170	0	72	G	C	0.042	-0.539234	0.2419474	0.02914116	0.02425678	0.03019227
2	2_130834633_G_T	130834633	0	72	T	G	0.062	-0.3813394	0.1768779	0.03462885	0.02911811	0.03541945
2	2_130898816_C_T	130898816	0	72	T	C	0.056	-0.5772702	0.2218362	0.01135828	0.008938762	0.01291022
2	2_130899661_G_A	130899661	0	72	A	G	0.049	-0.520696	0.2288747	0.02606184	0.02155125	0.0272461
2	2_130899791_C_T	130899791	0	72	T	C	0.049	-0.4302384	0.1951073	0.03082954	0.0257473	0.03180328
2	2_130899997_C_G	130899997	0	72	G	C	0.049	-0.520696	0.2288747	0.02606184	0.02155125	0.0272461
2	2_130911901_C_T	130911901	0	72	T	C	0.021	0.7516928	0.3201385	0.02178937	0.01782835	0.02313646
2	2_130930494_T_TG	130930494	0	72	TG	T	0.021	0.7516928	0.3201385	0.02178937	0.01782835	0.02313646
2	2_130930961_G_A	130930961	0	72	A	G	0.021	0.7516928	0.3201385	0.02178937	0.01782835	0.02313646
2	2_130932671_TTA_T	130932671	0	72	T	TTA	0.021	0.7516928	0.3201385	0.02178937	0.01782835	0.02313646
2	2_130939836_C_A	130939836	0	72	A	C	0.021	0.7516928	0.3201385	0.02178937	0.01782835	0.02313646
2	2_130948322_T_TTTG	130948322	0	72	TTTG	T	0.021	0.7516928	0.3201385	0.02178937	0.01782835	0.02313646
2	2_130948333_T_G	130948333	0	72	G	T	0.021	0.7516928	0.3201385	0.02178937	0.01782835	0.02313646
2	2_130949635_G_C	130949635	0	72	C	G	0.021	0.7516928	0.3201385	0.02178937	0.01782835	0.02313646
2	2_130951967_C_T	130951967	0	72	T	C	0.021	0.7516928	0.3201385	0.02178937	0.01782835	0.02313646
2	2_130987827_G_GTGCCGCATGC	130987827	0	72	GTGCCGCATGC	G	0.021	0.7304618	0.316418	0.02401632	0.01976406	0.02528219
2	2_130988017_C_G	130988017	0	72	G	C	0.021	0.7304618	0.316418	0.02401632	0.01976406	0.02528219
2	2_131220742_C_G	131220742	0	72	G	C	0.049	-0.4513694	0.1973572	0.02530968	0.02089311	0.02652466
2	2_131221445_G_A	131221445	0	72	A	G	0.812	0.2712169	0.1077789	0.01422007	0.01134287	0.01575586
2	2_131221622_C_T	131221622	0	72	T	C	0.076	-0.3733038	0.1591651	0.02193208	0.01795207	0.02327424
2	2_131232011_C_T	131232011	0	72	T	C	0.66	0.2971654	0.1036482	0.005511018	0.004151368	0.006898147
2	2_131232617_G_T	131232617	0	72	T	G	0.861	0.291191	0.1210392	0.01886381	0.01530299	0.02030259
2	2_131379209_T_C	131379209	0	72	C	T	0.09	-0.3362619	0.1513227	0.02960334	0.02466432	0.03063355
2	2_131388915_C_T	131388915	0	72	T	C	0.243	-0.2516804	0.1056298	0.01998902	0.01627177	0.02139481
2	2_131407782_T_C	131407782	0	72	C	T	0.021	-0.6830103	0.309377	0.03064237	0.02558183	0.03162481
2	2_131414878_A_C	131414878	0	72	C	A	0.139	0.3189689	0.1306839	0.01726581	0.01393298	0.01874576
2	2_132021023_G_A	132021023	0	72	A	G	0.118	-0.3124747	0.1373287	0.0260396	0.02153178	0.02722478
2	2_132021404_C_T	132021404	0	72	T	C	0.125	-0.3259782	0.1329351	0.01677255	0.01351155	0.0182637
2	2_132021475_G_A	132021475	0	72	A	G	0.125	-0.3259782	0.1329351	0.01677255	0.01351155	0.0182637
2	2_132249372_C_T	132249372	0	72	T	C	0.91	0.3232746	0.1508259	0.03566423	0.03004047	0.03640308
2	2_132249916_AC_A	132249916	0	72	A	AC	0.104	-0.3258453	0.1429124	0.02574662	0.0212753	0.02694385
2	2_132258153_C_CACCTGCTACCTACCTGCTACCTGCTACCTG	132258153	0	72	CACCTGCTACCTACCTGCTACCTGCTACCTG	C	0.09	-0.3639502	0.139569	0.01119591	0.008803356	0.01274742
2	2_132266246_T_C	132266246	0	72	C	T	0.125	-0.3486841	0.1336869	0.01117983	0.008789956	0.01273129
2	2_132274370_C_T	132274370	0	72	T	C	0.09	-0.3639502	0.139569	0.01119591	0.008803356	0.01274742
2	2_132288315_G_A	132288315	0	72	A	G	0.056	-0.4339466	0.1819378	0.01986578	0.0161655	0.02127533
2	2_132290464_G_A	132290464	0	72	A	G	0.104	-0.35204	0.1389245	0.01358433	0.01080611	0.01512722
2	2_133174764_C_T	133174764	0	72	T	C	0.41	-0.1839969	0.08309077	0.03015596	0.02515208	0.03116089
2	2_133175524_G_A	133175524	0	72	A	G	0.153	-0.2644016	0.1117777	0.02086773	0.01703053	0.02224572
2	2_135781035_C_T	135781035	0	72	T	C	0.076	0.3648481	0.1460171	0.01488775	0.0119081	0.01641423
2	2_135890608_G_C	135890608	0	72	C	G	0.076	0.3648481	0.1460171	0.01488775	0.0119081	0.01641423
2	2_135920091_C_T	135920091	0	72	T	C	0.062	-0.4013903	0.1856438	0.03412803	0.02867252	0.0349434
2	2_135920108_C_T	135920108	0	72	T	C	0.062	-0.4013903	0.1856438	0.03412803	0.02867252	0.0349434
2	2_135927428_T_C	135927428	0	72	C	T	0.062	-0.4013903	0.1856438	0.03412803	0.02867252	0.0349434
2	2_135960553_T_A	135960553	0	72	A	T	0.062	-0.4013903	0.1856438	0.03412803	0.02867252	0.0349434
2	2_135960616_G_A	135960616	0	72	A	G	0.062	-0.4013903	0.1856438	0.03412803	0.02867252	0.0349434
2	2_135976740_T_C	135976740	0	72	C	T	0.062	-0.4013903	0.1856438	0.03412803	0.02867252	0.0349434
2	2_136552371_A_G	136552371	0	72	G	A	0.049	0.4517131	0.1688629	0.009352009	0.007274193	0.01088563
2	2_137917738_A_T	137917738	0	72	T	A	0.062	0.6750015	0.172269	0.0002095331	0.0001289137	0.0005240419
2	2_137917763_G_A	137917763	0	72	A	G	0.062	0.6750015	0.172269	0.0002095331	0.0001289137	0.0005240419
2	2_139045866_C_T	139045866	0	72	T	C	0.028	-0.6410401	0.2703905	0.02059046	0.0167909	0.0219774
2	2_139046245_T_A	139046245	0	72	A	T	0.028	-0.6410401	0.2703905	0.02059046	0.0167909	0.0219774
2	2_139308127_G_A	139308127	0	72	A	G	0.062	0.4068348	0.1752511	0.02326731	0.0191118	0.02456146
2	2_141272360_GAA_GA	141272360	0	72	GA	GAA	0.153	0.3113394	0.1247952	0.01503673	0.01203444	0.0165609
2	2_141294285_GA_G	141294285	0	72	G	GA	0.181	-0.3390268	0.1184781	0.005597619	0.004220606	0.006990402
2	2_141625858_T_A	141625858	0	72	A	T	0.021	-0.630288	0.2937314	0.03546187	0.02986008	0.0362109
2	2_141763087_G_A	141763087	0	72	A	G	0.049	0.4361614	0.1978682	0.03089082	0.02580149	0.03186169
2	2_141816367_C_T	141816367	0	72	T	C	0.028	-0.5886598	0.2526929	0.02280741	0.0187119	0.02411846
2	2_144899559_C_A	144899559	0	72	A	C	0.562	-0.2127099	0.08490056	0.01463126	0.01169079	0.01616153
2	2_144934819_TA_T	144934819	0	72	T	TA	0.056	0.4114787	0.1826242	0.02747931	0.0227945	0.02860367
2	2_151343986_A_T	151343986	0	72	T	A	0.028	-0.5702954	0.2513878	0.02647207	0.02191067	0.02763926
2	2_152331351_G_GT	152331351	0	72	GT	G	0.062	-0.4495428	0.1721406	0.01108332	0.008709526	0.01263442
2	2_152437986_T_C	152437986	0	72	C	T	0.056	-0.3815221	0.167957	0.02628291	0.0217449	0.027458
2	2_153399497_A_C	153399497	0	72	C	A	0.299	0.2184737	0.1018984	0.03560834	0.02999064	0.03635001
2	2_153405594_G_A	153405594	0	72	A	G	0.59	-0.185888	0.0860514	0.03428517	0.02881228	0.03509278
2	2_153415244_T_C	153415244	0	72	C	T	0.521	-0.2363691	0.08897756	0.009829409	0.007668521	0.01137012
2	2_153435288_G_A	153435288	0	72	A	G	0.549	-0.2208904	0.08172575	0.00867529	0.006717289	0.01019548
2	2_153484778_C_G	153484778	0	72	G	C	0.028	0.7373441	0.2807366	0.01065087	0.008349679	0.01219965
2	2_153494248_T_A	153494248	0	72	A	T	0.028	0.7373441	0.2807366	0.01065087	0.008349679	0.01219965
2	2_153499668_G_A	153499668	0	72	A	G	0.028	0.7373441	0.2807366	0.01065087	0.008349679	0.01219965
2	2_153529198_GA_G	153529198	0	72	G	GA	0.035	0.5297613	0.224966	0.02142358	0.01751146	0.02278314
2	2_157425492_A_T	157425492	0	72	T	A	0.028	0.5445081	0.2510679	0.03360118	0.02820416	0.03444241
2	2_158300581_G_C	158300581	0	72	C	G	0.028	-0.5715344	0.2510883	0.02598588	0.02148474	0.02717328
2	2_158395079_C_G	158395079	0	72	G	C	0.889	0.3395009	0.129201	0.01061598	0.008320683	0.01216452
2	2_159195562_A_G	159195562	0	72	G	A	0.035	-0.5248216	0.228711	0.02484336	0.02048564	0.02607697
2	2_160261262_AAT_A	160261262	0	72	A	AAT	0.035	0.5143264	0.2398176	0.03555656	0.02994448	0.03630083
2	2_161169956_G_C	161169956	0	72	C	G	0.778	0.2570599	0.1081629	0.02029433	0.01653518	0.02169065
2	2_162274847_G_C	162274847	0	72	C	G	0.035	0.535319	0.2275087	0.02152426	0.01759865	0.02288041
2	2_162875933_AC_A	162875933	0	72	A	AC	0.035	0.4998813	0.2307324	0.03378117	0.02836412	0.03461359
2	2_162877041_CA_C	162877041	0	72	C	CA	0.264	-0.2714834	0.1145103	0.0205891	0.01678973	0.02197609
2	2_163134090_C_A	163134090	0	72	A	C	0.021	-0.6484055	0.2941794	0.03090454	0.02581362	0.03187478
2	2_163230185_C_T	163230185	0	72	T	C	0.049	-0.3689736	0.1605058	0.02459437	0.02026825	0.0258378
2	2_165383686_AATATATATATATATATATATATATAT_AATATATATAT	165383686	0	72	AATATATATAT	AATATATATATATATATATATATATAT	0.049	-0.3321043	0.1535423	0.03406421	0.02861576	0.03488272
2	2_166165367_A_C	166165367	0	72	C	A	0.028	0.5645352	0.2532017	0.02908097	0.02420373	0.03013478
2	2_168115797_G_C	168115797	0	72	C	G	0.097	0.3962831	0.1459278	0.008379307	0.006474509	0.009892259
2	2_169712596_T_C	169712596	0	72	C	T	0.069	0.5151141	0.1733832	0.004100517	0.003033671	0.00537215
2	2_169716114_T_C	169716114	0	72	C	T	0.069	0.5151141	0.1733832	0.004100517	0.003033671	0.00537215
2	2_169985418_T_C	169985418	0	72	C	T	0.062	-0.4437899	0.1731569	0.01259692	0.00997539	0.01414707
2	2_169988946_T_A	169988946	0	72	A	T	0.062	-0.4437899	0.1731569	0.01259692	0.00997539	0.01414707
2	2_170025083_A_G	170025083	0	72	G	A	0.188	0.3765589	0.1075717	0.0008244952	0.0005525492	0.001469365
2	2_170029800_T_C	170029800	0	72	C	T	0.188	0.349731	0.1113406	0.002492049	0.001788259	0.003553754
2	2_170029922_C_A	170029922	0	72	A	C	0.181	0.3828945	0.1118587	0.001052865	0.0007163815	0.001778979
2	2_170030821_T_C	170030821	0	72	C	T	0.181	0.3828945	0.1118587	0.001052865	0.0007163815	0.001778979
2	2_170031529_TAA_TAAA	170031529	0	72	TAAA	TAA	0.104	-0.32397	0.1418428	0.02549904	0.02105869	0.02670636
2	2_170136180_A_C	170136180	0	72	C	A	0.028	-0.5859137	0.252338	0.02323867	0.01908688	0.02453388
2	2_170425526_C_A	170425526	0	72	A	C	0.083	0.3847939	0.157926	0.01745183	0.01409209	0.01892736
2	2_170606588_A_G	170606588	0	72	G	A	0.472	0.4137725	0.1860008	0.02943225	0.02451341	0.03047022
2	2_171508056_T_C	171508056	0	72	C	T	0.104	-0.3312552	0.1313769	0.01403726	0.01118837	0.01557528
2	2_172600716_C_A	172600716	0	72	A	C	0.222	0.2630954	0.09882599	0.009680059	0.007545035	0.01121875
2	2_172690418_C_T	172690418	0	72	T	C	0.215	0.2597252	0.1039509	0.01489269	0.01191229	0.01641909
2	2_172693780_G_A	172693780	0	72	A	G	0.229	0.2574591	0.09449344	0.008176213	0.006308216	0.009683688
2	2_172926211_T_G	172926211	0	72	G	T	0.181	0.2810658	0.1136356	0.01588683	0.01275666	0.01739615
2	2_172942448_A_C	172942448	0	72	C	A	0.167	0.3660022	0.1189398	0.003010485	0.002185497	0.004152293
2	2_173340200_C_CA	173340200	0	72	CA	C	0.132	-0.3075152	0.134339	0.0251848	0.02078395	0.0264048
2	2_173352103_C_T	173352103	0	72	T	C	0.174	-0.2647743	0.118291	0.02847722	0.02367198	0.02955797
2	2_173369000_A_AT	173369000	0	72	AT	A	0.125	-0.3889561	0.1377792	0.006233968	0.004731282	0.007664137
2	2_174034447_C_CA	174034447	0	72	CA	C	0.021	-0.6299757	0.2927996	0.03498691	0.02943691	0.03575969
2	2_175223296_T_A	175223296	0	72	A	T	0.528	-0.185765	0.08258731	0.0277342	0.02301846	0.02884753
2	2_175613021_G_A	175613021	0	72	A	G	0.028	-0.5894503	0.2527974	0.02268609	0.01860649	0.02400153
2	2_175689342_CTA_CTATA	175689342	0	72	CTATA	CTA	0.097	0.3375986	0.1450042	0.02288331	0.01877786	0.02419159
2	2_175939604_G_A	175939604	0	72	A	G	0.062	-0.3519548	0.1580203	0.02924248	0.02434609	0.03028903
2	2_175945338_G_A	175945338	0	72	A	G	0.09	-0.4073352	0.1352758	0.003651045	0.002682031	0.004874453
2	2_175945502_GA_G	175945502	0	72	G	GA	0.062	-0.3519548	0.1580203	0.02924248	0.02434609	0.03028903
2	2_175992074_T_C	175992074	0	72	C	T	0.028	-0.5711129	0.2511229	0.02611185	0.02159506	0.02729405
2	2_175994967_A_C	175994967	0	72	C	A	0.028	-0.5711129	0.2511229	0.02611185	0.02159506	0.02729405
2	2_176805795_A_C	176805795	0	72	C	A	0.056	-0.4953039	0.1845884	0.009146052	0.007104439	0.01067602
2	2_176857749_C_T	176857749	0	72	T	C	0.062	-0.3853807	0.1774186	0.03333416	0.02796694	0.03418842
2	2_176944696_C_T	176944696	0	72	T	C	0.028	-0.6348074	0.286211	0.02990061	0.02492663	0.03091726
2	2_179393111_A_G	179393111	0	72	G	A	0.056	-0.467889	0.1911739	0.01697483	0.01368429	0.01846148
2	2_179395760_G_A	179395760	0	72	A	G	0.056	-0.467889	0.1911739	0.01697483	0.01368429	0.01846148
2	2_179431797_A_T	179431797	0	72	T	A	0.056	-0.467889	0.1911739	0.01697483	0.01368429	0.01846148
2	2_179472825_T_C	179472825	0	72	C	T	0.035	-0.5100514	0.2268878	0.0278201	0.02309396	0.02892969
2	2_179527910_A_T	179527910	0	72	T	A	0.076	-0.3825201	0.1635638	0.02230011	0.01827133	0.02362936
2	2_179616759_G_A	179616759	0	72	A	G	0.028	0.6144142	0.2543651	0.01840724	0.01491085	0.0198585
2	2_179979930_T_C	179979930	0	72	C	T	0.146	-0.3266148	0.1129586	0.005144441	0.003859024	0.006505984
2	2_179982125_AAGAT_A	179982125	0	72	A	AAGAT	0.431	-0.2084304	0.0892414	0.02247044	0.01841919	0.02379363
2	2_182347072_T_C	182347072	0	72	C	T	0.188	0.2636173	0.1042499	0.01377395	0.01096605	0.01531491
2	2_182350489_T_C	182350489	0	72	C	T	0.174	0.2808445	0.1080179	0.01142626	0.008995496	0.01297835
2	2_182778704_T_G	182778704	0	72	G	T	0.167	0.2401488	0.1048863	0.02515337	0.02075648	0.02637463
2	2_183793398_A_G	183793398	0	72	G	A	0.681	0.214936	0.09308504	0.02398726	0.01973874	0.02525425
2	2_183799558_G_C	183799558	0	72	C	G	0.681	0.214936	0.09308504	0.02398726	0.01973874	0.02525425
2	2_183848114_T_C	183848114	0	72	C	T	0.319	-0.214936	0.09308504	0.02398726	0.01973874	0.02525425
2	2_187528635_A_G	187528635	0	72	G	A	0.201	0.2067159	0.09058677	0.02562599	0.02116974	0.02682814
2	2_187626338_C_T	187626338	0	72	T	C	0.201	0.2137733	0.09280586	0.02431748	0.02002665	0.02557172
2	2_188361675_A_G	188361675	0	72	G	A	0.035	0.6753704	0.2553674	0.01014499	0.007929815	0.01168939
2	2_189923630_ATT_A	189923630	0	72	A	ATT	0.146	0.3836212	0.1227686	0.002616061	0.001882859	0.003698277
2	2_191114688_G_A	191114688	0	72	A	G	0.028	-0.5702874	0.2513995	0.02648087	0.02191839	0.0276477
2	2_191125797_A_G	191125797	0	72	G	A	0.042	-0.5928871	0.2104235	0.00632929	0.004808056	0.007764471
2	2_191125867_A_T	191125867	0	72	T	A	0.028	-0.5702874	0.2513995	0.02648087	0.02191839	0.0276477
2	2_191922307_CT_C	191922307	0	72	C	CT	0.569	-0.2292617	0.07638293	0.003754796	0.002762979	0.004989932
2	2_192711162_A_C	192711162	0	72	C	A	0.944	0.6501176	0.2348741	0.007261637	0.005562496	0.008738777
2	2_196619340_T_G	196619340	0	72	G	T	0.799	0.3328259	0.1038158	0.002052155	0.001455104	0.003032891
2	2_196749544_C_A	196749544	0	72	A	C	0.222	-0.221891	0.09810608	0.02691422	0.02229842	0.02806277
2	2_196825238_C_A	196825238	0	72	A	C	0.049	0.4362217	0.1978869	0.03088375	0.02579524	0.03185496
2	2_196866420_C_T	196866420	0	72	T	C	0.778	0.2722975	0.1160915	0.02192371	0.01794482	0.02326616
2	2_197008449_A_G	197008449	0	72	G	A	0.076	-0.3867411	0.173659	0.02926073	0.02436218	0.03030645
2	2_197118604_A_T	197118604	0	72	T	A	0.021	-0.64872	0.2942219	0.03084941	0.02576487	0.03182222
2	2_197135889_T_A	197135889	0	72	A	T	0.021	-0.64872	0.2942219	0.03084941	0.02576487	0.03182222
2	2_197183367_A_G	197183367	0	72	G	A	0.021	-0.64872	0.2942219	0.03084941	0.02576487	0.03182222
2	2_197208350_A_G	197208350	0	72	G	A	0.021	-0.64872	0.2942219	0.03084941	0.02576487	0.03182222
2	2_197654578_GA_G	197654578	0	72	G	GA	0.222	0.2651114	0.1179147	0.02780013	0.02307641	0.02891059
2	2_197755455_T_G	197755455	0	72	G	T	0.083	-0.3555395	0.1560468	0.02584818	0.02136419	0.02704124
2	2_198404929_C_G	198404929	0	72	G	C	0.028	-0.5903646	0.2529196	0.02254719	0.01848584	0.02386763
2	2_201719916_A_G	201719916	0	72	G	A	0.035	0.6497835	0.2284731	0.005879053	0.004446052	0.007289244
2	2_201721782_C_T	201721782	0	72	T	C	0.035	0.5772756	0.2244915	0.01231765	0.00974112	0.01386896
2	2_201722827_C_A	201722827	0	72	A	C	0.035	0.6497835	0.2284731	0.005879053	0.004446052	0.007289244
2	2_202195311_G_A	202195311	0	72	A	G	0.062	0.4332742	0.173334	0.01485007	0.01187616	0.01637712
2	2_202358395_T_C	202358395	0	72	C	T	0.042	0.5002611	0.2097573	0.01987499	0.01617345	0.02128426
2	2_202358589_G_A	202358589	0	72	A	G	0.042	0.5002611	0.2097573	0.01987499	0.01617345	0.02128426
2	2_203624120_CT_C	203624120	0	72	C	CT	0.056	0.4737701	0.1826542	0.01161416	0.009152391	0.01316647
2	2_204154677_A_T	204154677	0	72	T	A	0.083	0.3755121	0.158501	0.02067521	0.01686413	0.02205944
2	2_205969220_G_A	205969220	0	72	A	G	0.604	-0.1641835	0.07511203	0.0322735	0.02702577	0.03317899
2	2_206041249_T_G	206041249	0	72	G	T	0.021	-0.6407686	0.2932217	0.03231767	0.02706492	0.03322104
2	2_207911094_GAGA_G	207911094	0	72	G	GAGA	0.021	-0.6303023	0.2937409	0.03546358	0.02986161	0.03621252
2	2_207911335_A_G	207911335	0	72	G	A	0.028	0.6365211	0.2774888	0.02489379	0.02052969	0.02612541
2	2_208811097_C_T	208811097	0	72	T	C	0.576	-0.1783211	0.07889921	0.02702072	0.02239187	0.02816474
2	2_209035485_T_G	209035485	0	72	G	T	0.854	0.2419622	0.1126161	0.03523361	0.02965667	0.03599407
2	2_209035849_A_C	209035849	0	72	C	A	0.854	0.2419622	0.1126161	0.03523361	0.02965667	0.03599407
2	2_209036457_G_GCCACTCCAT	209036457	0	72	GCCACTCCAT	G	0.833	0.229679	0.1058445	0.03350647	0.02812001	0.03435233
2	2_209113048_G_GA	209113048	0	72	GA	G	0.049	-0.4302138	0.1950721	0.03080963	0.02572969	0.03178429
2	2_209195470_A_AT	209195470	0	72	AT	A	0.021	-0.6408152	0.293227	0.03230851	0.0270568	0.03321232
2	2_211525420_A_G	211525420	0	72	G	A	0.056	-0.412971	0.1831592	0.02737565	0.02270346	0.02850448
2	2_213945758_C_A	213945758	0	72	A	C	0.021	-0.6644704	0.3045454	0.0325806	0.02729809	0.03347134
2	2_213945987_C_A	213945987	0	72	A	C	0.049	0.5464443	0.192834	0.006050369	0.004583606	0.007470467
2	2_214287064_A_G	214287064	0	72	G	A	0.056	-0.4067157	0.1828408	0.0294427	0.02452263	0.0304802
2	2_215645545_C_G	215645545	0	72	G	C	0.194	-0.2306773	0.1071605	0.03489886	0.0293585	0.03567603
2	2_215657178_T_A	215657178	0	72	A	T	0.194	0.2863215	0.1198541	0.01967866	0.01600423	0.02109385
2	2_215901592_A_G	215901592	0	72	G	A	0.181	0.256376	0.1130664	0.02654311	0.02197295	0.02770733
2	2_215901774_C_T	215901774	0	72	T	C	0.181	0.256376	0.1130664	0.02654311	0.02197295	0.02770733
2	2_216211604_A_G	216211604	0	72	G	A	0.021	-0.6437995	0.2935816	0.03173772	0.026551	0.03266874
2	2_217342000_T_C	217342000	0	72	C	T	0.41	0.2086576	0.07935718	0.01056935	0.008281935	0.01211754
2	2_217342063_A_G	217342063	0	72	G	A	0.41	0.2086576	0.07935718	0.01056935	0.008281935	0.01211754
2	2_217364013_C_T	217364013	0	72	T	C	0.056	0.5434374	0.1829608	0.004109009	0.003040338	0.005381492
2	2_217541426_C_T	217541426	0	72	T	C	0.056	0.5141274	0.1917847	0.009208857	0.00715618	0.01073998
2	2_217541437_G_A	217541437	0	72	A	G	0.056	0.5141274	0.1917847	0.009208857	0.00715618	0.01073998
2	2_218669225_T_C	218669225	0	72	C	T	0.083	-0.4145967	0.1527145	0.008396675	0.006488741	0.009910075
2	2_218694962_C_G	218694962	0	72	G	C	0.382	0.202075	0.08684555	0.02296054	0.018845	0.024266
2	2_218935299_T_C	218935299	0	72	C	T	0.181	0.3604045	0.108353	0.001422374	0.0009859916	0.002257785
2	2_218938244_T_C	218938244	0	72	C	T	0.208	0.3104248	0.1002947	0.002855721	0.002066442	0.003975105
2	2_218938696_G_A	218938696	0	72	A	G	0.028	0.6321513	0.2767096	0.02546662	0.02103034	0.02667525
2	2_218940418_C_T	218940418	0	72	T	C	0.118	0.3368905	0.1266471	0.009735753	0.007591071	0.01127522
2	2_219258503_AT_A	219258503	0	72	A	AT	0.049	-0.4118033	0.1755278	0.0218942	0.01791923	0.02323767
2	2_219294675_T_G	219294675	0	72	G	T	0.049	-0.4343078	0.1947417	0.02904011	0.02416772	0.03009575
2	2_219498759_T_G	219498759	0	72	G	T	0.646	-0.1784623	0.08327674	0.03569421	0.03006721	0.03643156
2	2_219508988_T_C	219508988	0	72	C	T	0.646	-0.1784623	0.08327674	0.03569421	0.03006721	0.03643156
2	2_219674163_C_T	219674163	0	72	T	C	0.035	0.423351	0.1823444	0.02325176	0.01909827	0.02454649
2	2_219674164_C_A	219674164	0	72	A	C	0.028	0.4913528	0.2222218	0.03039545	0.02536362	0.03138934
2	2_219694794_G_A	219694794	0	72	A	G	0.035	-0.5069268	0.2266786	0.02861476	0.02379306	0.0296894
2	2_220146148_T_A	220146148	0	72	A	T	0.028	0.5467231	0.2535112	0.03457568	0.02907078	0.03536891
2	2_220173910_A_C	220173910	0	72	C	A	0.069	-0.357599	0.1664681	0.03526704	0.02968645	0.03602582
2	2_220283773_G_A	220283773	0	72	A	G	0.035	0.6753704	0.2553674	0.01014499	0.007929815	0.01168939
2	2_220361265_A_G	220361265	0	72	G	A	0.972	-0.756005	0.2836058	0.009589968	0.007470599	0.01112736
2	2_220362899_C_G	220362899	0	72	G	C	0.951	-0.6940952	0.2528161	0.00772398	0.005938819	0.009217667
2	2_220371181_T_A	220371181	0	72	A	T	0.972	-0.756005	0.2836058	0.009589968	0.007470599	0.01112736
2	2_220419339_T_C	220419339	0	72	C	T	0.972	-0.7293357	0.279494	0.01114223	0.008758616	0.01269356
2	2_220420956_A_G	220420956	0	72	G	A	0.972	-0.7293357	0.279494	0.01114223	0.008758616	0.01269356
2	2_220466199_G_T	220466199	0	72	T	G	0.875	0.4669738	0.1794926	0.01137642	0.008953903	0.01292841
2	2_222434898_T_C	222434898	0	72	C	T	0.201	-0.2865685	0.1177296	0.01755933	0.01418409	0.01903226
2	2_223161624_A_G	223161624	0	72	G	A	0.507	-0.2580406	0.09356351	0.007464467	0.005727418	0.008949186
2	2_223488979_G_A	223488979	0	72	A	G	0.035	0.4999347	0.2307509	0.03377653	0.02835999	0.03460917
2	2_224463164_G_A	224463164	0	72	A	G	0.056	-0.4286702	0.162459	0.01031074	0.008067248	0.01185678
2	2_224777094_T_C	224777094	0	72	C	T	0.882	0.3709151	0.1225189	0.003482531	0.002550853	0.004686064
2	2_224777105_G_GTGAT	224777105	0	72	GTGAT	G	0.882	0.3709151	0.1225189	0.003482531	0.002550853	0.004686064
2	2_224809804_C_T	224809804	0	72	T	C	0.028	0.5465554	0.2534475	0.03458534	0.02907938	0.03537809
2	2_224856650_G_A	224856650	0	72	A	G	0.104	-0.3127397	0.145975	0.03574297	0.03011069	0.03647787
2	2_224866576_C_A	224866576	0	72	A	C	0.181	0.2466004	0.1040221	0.02059763	0.0167971	0.02198435
2	2_224866712_CAGAT_C	224866712	0	72	C	CAGAT	0.174	0.2335257	0.1086139	0.03511041	0.02954691	0.03587703
2	2_226377975_G_A	226377975	0	72	A	G	0.021	-0.6624894	0.3040115	0.03278786	0.02748196	0.03366861
2	2_226378035_T_C	226378035	0	72	C	T	0.021	-0.6624894	0.3040115	0.03278786	0.02748196	0.03366861
2	2_227979452_A_G	227979452	0	72	G	A	0.097	0.3268987	0.141308	0.02373276	0.01951698	0.02500944
2	2_228118815_G_A	228118815	0	72	A	G	0.028	-0.5908759	0.2583281	0.02529492	0.02088021	0.02651049
2	2_228118867_G_A	228118867	0	72	A	G	0.028	-0.5908759	0.2583281	0.02529492	0.02088021	0.02651049
2	2_228122231_A_G	228122231	0	72	G	A	0.028	-0.5908759	0.2583281	0.02529492	0.02088021	0.02651049
2	2_228477814_G_C	228477814	0	72	C	G	0.382	-0.161287	0.07497982	0.03502682	0.02947246	0.03579761
2	2_230223477_CA_C	230223477	0	72	C	CA	0.049	-0.4641468	0.1682551	0.007450737	0.005716246	0.008934959
2	2_230655733_C_T	230655733	0	72	T	C	0.938	-0.4490058	0.1725638	0.01136629	0.008945446	0.01291825
2	2_231120257_G_C	231120257	0	72	C	G	0.035	0.529629	0.2251502	0.02155765	0.01762758	0.02291267
2	2_231330919_C_T	231330919	0	72	T	C	0.035	0.4950226	0.2280537	0.0334533	0.02807277	0.03430175
2	2_231738168_G_A	231738168	0	72	A	G	0.493	-0.1922133	0.08705768	0.03062859	0.02556965	0.03161168
2	2_231738263_C_T	231738263	0	72	T	C	0.507	-0.1918106	0.08582283	0.0287086	0.02387569	0.02977907
2	2_231738269_G_A	231738269	0	72	A	G	0.507	-0.1918106	0.08582283	0.0287086	0.02387569	0.02977907
2	2_231738318_T_C	231738318	0	72	C	T	0.507	-0.1918106	0.08582283	0.0287086	0.02387569	0.02977907
2	2_231741711_A_G	231741711	0	72	G	A	0.028	0.613836	0.2520513	0.01750436	0.01413704	0.01897862
2	2_231742711_T_G	231742711	0	72	G	T	0.236	0.2720506	0.09687775	0.00649699	0.004943293	0.007940645
2	2_231860838_C_T	231860838	0	72	T	C	0.75	0.2388856	0.09741797	0.01677205	0.01351113	0.01826322
2	2_231861032_TCAGCAGCCTAGCCCTGAATCCACACCA_T	231861032	0	72	T	TCAGCAGCCTAGCCCTGAATCCACACCA	0.493	0.2569279	0.09257951	0.00711761	0.005445553	0.008589051
2	2_231921586_G_C	231921586	0	72	C	G	0.194	-0.2342138	0.1002936	0.02248702	0.01843359	0.02380961
2	2_232245649_G_A	232245649	0	72	A	G	0.069	0.3779592	0.1678781	0.02759581	0.02289685	0.02871514
2	2_233103469_A_G	233103469	0	72	G	A	0.028	0.6657936	0.2826562	0.0213896	0.01748204	0.0227503
2	2_233194516_T_C	233194516	0	72	C	T	0.076	0.4201	0.1628243	0.0120422	0.009510358	0.01359423
2	2_233243793_C_T	233243793	0	72	T	C	0.021	0.6799032	0.2973112	0.02532373	0.0209054	0.02653814
2	2_233243796_T_C	233243796	0	72	C	T	0.021	0.6799032	0.2973112	0.02532373	0.0209054	0.02653814
2	2_233273368_T_G	233273368	0	72	G	T	0.062	0.4477923	0.1713138	0.01101336	0.008651255	0.01256417
2	2_233274145_G_C	233274145	0	72	C	G	0.903	0.3612068	0.1225607	0.004390268	0.003261609	0.005689694
2	2_233346401_A_C	233346401	0	72	C	A	0.049	0.473574	0.1962402	0.01851176	0.01500057	0.01996021
2	2_233348005_G_T	233348005	0	72	T	G	0.056	-0.4063468	0.1829563	0.02968458	0.02473599	0.03071109
2	2_233385025_G_A	233385025	0	72	A	G	0.833	-0.2565575	0.1141006	0.02778741	0.02306523	0.02889843
2	2_233385202_C_T	233385202	0	72	T	C	0.299	0.2141005	0.09732324	0.03121654	0.02608961	0.03217216
2	2_233392020_AAGAG_AAG	233392020	0	72	AAG	AAGAG	0.076	0.4529403	0.1605655	0.006271112	0.00476119	0.007703251
2	2_233395974_GGGACCCTCTAGGACCGGTGCCCCAAGGTCACAGCT_G	233395974	0	72	G	GGGACCCTCTAGGACCGGTGCCCCAAGGTCACAGCT	0.194	-0.237692	0.1066821	0.02918891	0.02429886	0.03023787
2	2_233408239_C_G	233408239	0	72	G	C	0.889	-0.3058097	0.1415458	0.03426077	0.02879057	0.03506958
2	2_233502984_A_G	233502984	0	72	G	A	0.153	-0.2646143	0.1103247	0.01921095	0.01560152	0.02063988
2	2_234056091_C_G	234056091	0	72	G	C	0.069	-0.4192691	0.1693979	0.01581943	0.01269932	0.01733002
2	2_234229295_C_T	234229295	0	72	T	C	0.035	0.4994212	0.230572	0.03381998	0.02839861	0.03465049
2	2_234701492_A_G	234701492	0	72	G	A	0.042	0.5385538	0.2511633	0.03559143	0.02997557	0.03633395
2	2_234727287_A_G	234727287	0	72	G	A	0.028	-0.5822519	0.2518912	0.02384112	0.01961138	0.02511369
2	2_234758393_C_T	234758393	0	72	T	C	0.049	0.4290795	0.1949626	0.03114698	0.02602807	0.03210587
2	2_234835102_G_A	234835102	0	72	A	G	0.021	0.7139378	0.3134964	0.02591585	0.02142343	0.02710614
2	2_236617869_G_A	236617869	0	72	A	G	0.035	0.5725361	0.2390315	0.01936945	0.01573793	0.02079378
2	2_237074827_C_T	237074827	0	72	T	C	0.028	-0.6348074	0.286211	0.02990061	0.02492663	0.03091726
2	2_237405693_A_G	237405693	0	72	G	A	0.021	-0.6308281	0.2940512	0.03550316	0.02989688	0.03625011
2	2_238260829_G_T	238260829	0	72	T	G	0.625	0.2122748	0.08975922	0.02089317	0.01705253	0.02227033
2	2_238433955_T_C	238433955	0	72	C	T	0.083	0.3582503	0.1534088	0.02248787	0.01843432	0.02381043
2	2_238499863_A_AAATTCTTCAGGAGACTCT	238499863	0	72	AAATTCTTCAGGAGACTCT	A	0.5	-0.1819945	0.08318294	0.03211843	0.02688831	0.03303133
2	2_238499866_C_T	238499866	0	72	T	C	0.5	-0.1819945	0.08318294	0.03211843	0.02688831	0.03303133
2	2_238503463_A_G	238503463	0	72	G	A	0.104	0.3238559	0.1442216	0.02798739	0.02324104	0.02908969
2	2_238503473_C_T	238503473	0	72	T	C	0.104	0.3238559	0.1442216	0.02798739	0.02324104	0.02908969
2	2_238503482_C_T	238503482	0	72	T	C	0.104	0.3238559	0.1442216	0.02798739	0.02324104	0.02908969
2	2_238503502_C_T	238503502	0	72	T	C	0.104	0.3238559	0.1442216	0.02798739	0.02324104	0.02908969
2	2_238503561_C_A	238503561	0	72	A	C	0.104	0.3238559	0.1442216	0.02798739	0.02324104	0.02908969
2	2_238644136_A_G	238644136	0	72	G	A	0.188	0.2763395	0.1217401	0.02638721	0.0218363	0.02755795
2	2_238925155_CT_C	238925155	0	72	C	CT	0.104	0.3485188	0.1448636	0.01885992	0.01529965	0.02029881
2	2_239050033_C_T	239050033	0	72	T	C	0.632	0.1935258	0.08159001	0.02053219	0.01674057	0.021921
2	2_239050356_C_G	239050356	0	72	G	C	0.785	0.2160603	0.09697525	0.02919215	0.02430172	0.03024097
2	2_239051639_T_A	239051639	0	72	A	T	0.104	-0.4646011	0.1234405	0.0003512688	0.0002232195	0.0007670561
2	2_239054504_G_T	239054504	0	72	T	G	0.688	0.2064751	0.09176685	0.02768876	0.02297852	0.02880406
2	2_239056794_C_T	239056794	0	72	T	C	0.167	0.2259642	0.1053326	0.0355077	0.02990093	0.03625442
2	2_239133672_G_C	239133672	0	72	C	G	0.097	0.4005777	0.1439478	0.00697018	0.005325994	0.008435506
2	2_239140352_T_TGGCCTCCGGGCCGCGGTGGCCTCCGGGCCGCGGTGGCCTCCGGGCCGCGGCGGCCTCCGGGCCGCGGC	239140352	0	72	TGGCCTCCGGGCCGCGGTGGCCTCCGGGCCGCGGTGGCCTCCGGGCCGCGGCGGCCTCCGGGCCGCGGC	T	0.028	0.5460453	0.2532492	0.03461176	0.0291029	0.0354032
2	2_239149377_G_C	239149377	0	72	C	G	0.153	0.2861088	0.1162497	0.01639205	0.01318697	0.01789133
2	2_239229372_C_A	239229372	0	72	A	C	0.743	0.2209349	0.0923625	0.01952516	0.015872	0.02094491
2	2_239307245_A_G	239307245	0	72	G	A	0.764	0.2297612	0.08922091	0.01219803	0.009640869	0.01374971
2	2_240055873_A_G	240055873	0	72	G	A	0.069	0.3765392	0.1676092	0.02792099	0.02318265	0.02902618
2	2_240055931_T_C	240055931	0	72	C	T	0.069	0.3765392	0.1676092	0.02792099	0.02318265	0.02902618
2	2_240062523_G_A	240062523	0	72	A	G	0.028	0.6143344	0.2543398	0.01841061	0.01491373	0.01986177
2	2_240083528_G_A	240083528	0	72	A	G	0.611	0.2001267	0.08189173	0.01713341	0.01381979	0.01861644
2	2_240083731_C_T	240083731	0	72	T	C	0.521	0.2144759	0.08512432	0.0141048	0.01124543	0.01564201
2	2_240085674_C_T	240085674	0	72	T	C	0.535	0.1932508	0.08242623	0.02197868	0.01799248	0.02331921
2	2_241513972_C_T	241513972	0	72	T	C	0.049	0.5397663	0.2186821	0.01609674	0.01293535	0.01760199
2	2_241538229_A_G	241538229	0	72	G	A	0.764	0.2317822	0.09888113	0.02200491	0.01801522	0.02334453
2	2_241569595_G_A	241569595	0	72	A	G	0.028	0.7054417	0.2642957	0.009501481	0.00739753	0.01103752
2	2_241621908_G_A	241621908	0	72	A	G	0.028	-0.5908072	0.2529792	0.02248049	0.01842792	0.02380332
2	2_241661029_C_T	241661029	0	72	T	C	0.035	0.5048093	0.2285627	0.03057458	0.02552191	0.03156017
2	2_242149073_G_A	242149073	0	72	A	G	0.771	-0.2202773	0.09270227	0.02031558	0.01655353	0.02171124
2	2_242606036_G_C	242606036	0	72	C	G	0.472	-0.2505795	0.07505006	0.001368058	0.000946059	0.002188771
2	2_242607483_G_T	242607483	0	72	T	G	0.472	-0.2505795	0.07505006	0.001368058	0.000946059	0.002188771
2	2_242607484_C_T	242607484	0	72	T	C	0.472	-0.2505795	0.07505006	0.001368058	0.000946059	0.002188771
2	2_242611050_C_G	242611050	0	72	G	C	0.472	-0.2505795	0.07505006	0.001368058	0.000946059	0.002188771
2	2_242613089_A_G	242613089	0	72	G	A	0.604	-0.1898536	0.08375425	0.02658737	0.02201175	0.02774973
2	2_242613133_T_G	242613133	0	72	G	T	0.646	-0.182323	0.08474863	0.03500501	0.02945303	0.03577689
2	2_242616574_A_G	242616574	0	72	G	A	0.25	0.2164467	0.09743539	0.02965381	0.02470884	0.03068172
2	2_242617005_G_A	242617005	0	72	A	G	0.035	0.4835131	0.2094652	0.02402882	0.01977496	0.02529422
2	2_242617792_A_G	242617792	0	72	G	A	0.688	-0.1915606	0.08066573	0.02038848	0.01661646	0.02178184
2	2_242618050_A_G	242618050	0	72	G	A	0.472	-0.2505795	0.07505006	0.001368058	0.000946059	0.002188771
2	2_242622192_A_AG	242622192	0	72	AG	A	0.424	-0.2397858	0.0716561	0.001336676	0.0009230318	0.002148705
2	2_242622326_T_C	242622326	0	72	C	T	0.472	-0.2505795	0.07505006	0.001368058	0.000946059	0.002188771
2	2_242625413_A_T	242625413	0	72	T	A	0.451	-0.2310971	0.08596737	0.009025677	0.007005328	0.01055334
2	2_242648545_C_T	242648545	0	72	T	C	0.417	-0.3072483	0.09232501	0.001414984	0.0009805527	0.002248419
2	2_242648549_G_A	242648549	0	72	A	G	0.417	-0.3072483	0.09232501	0.001414984	0.0009805527	0.002248419
2	2_242662761_T_C	242662761	0	72	C	T	0.639	0.2720535	0.09128286	0.003991279	0.002947985	0.005251791
2	2_242812080_T_C	242812080	0	72	C	T	0.132	0.3328026	0.1290552	0.01208409	0.009545434	0.01363604
2	2_242813202_G_A	242813202	0	72	A	G	0.104	0.3996902	0.1395293	0.005549878	0.004182429	0.006939562
2	2_242813205_A_G	242813205	0	72	G	A	0.167	0.2606685	0.1181172	0.0307031	0.02563552	0.03168273
2	2_242814283_C_T	242814283	0	72	T	C	0.118	0.4054661	0.1247133	0.001789462	0.00125817	0.002714545
2	2_242814360_T_C	242814360	0	72	C	T	0.118	0.4054661	0.1247133	0.001789462	0.00125817	0.002714545
2	2_242814463_A_T	242814463	0	72	T	A	0.139	0.3493764	0.1249751	0.006728332	0.005130194	0.008182982
2	2_242841399_T_G	242841399	0	72	G	T	0.069	0.4507426	0.1513533	0.00401726	0.002968351	0.00528045
2	2_242842382_C_T	242842382	0	72	T	C	0.069	0.4507426	0.1513533	0.00401726	0.002968351	0.00528045
3	3_424417_TA_T	424417	0	72	T	TA	0.062	0.3955754	0.178979	0.03046166	0.02542212	0.03145248
3	3_1215013_A_C	1215013	0	72	C	A	0.438	0.1792675	0.08297655	0.03426411	0.02879355	0.03507276
3	3_1367338_G_A	1367338	0	72	A	G	0.049	-0.5630156	0.2504945	0.02784803	0.02311852	0.02895641
3	3_3076218_G_A	3076218	0	72	A	G	0.389	0.2081458	0.0797483	0.01112605	0.008745135	0.01267732
3	3_3076284_G_C	3076284	0	72	C	G	0.41	0.2189308	0.07851538	0.006863505	0.005239579	0.008324222
3	3_3076401_C_T	3076401	0	72	T	C	0.486	0.1970019	0.07916945	0.01528828	0.0122479	0.01680833
3	3_3076443_A_G	3076443	0	72	G	A	0.632	0.2391836	0.08421593	0.005943611	0.00449786	0.007357596
3	3_3080527_C_T	3080527	0	72	T	C	0.965	-0.649962	0.2285138	0.005874516	0.004442412	0.007284438
3	3_3133896_T_G	3133896	0	72	G	T	0.035	-0.5231105	0.228472	0.0251537	0.02075677	0.02637495
3	3_3143267_G_C	3143267	0	72	C	G	0.847	-0.3347032	0.1243039	0.008918384	0.006917055	0.01044388
3	3_3144519_A_G	3144519	0	72	G	A	0.09	-0.365951	0.1522419	0.01895953	0.01538528	0.02039562
3	3_3188362_A_G	3188362	0	72	G	A	0.771	0.2463488	0.1105616	0.0291806	0.02429154	0.03022993
3	3_3189279_A_G	3189279	0	72	G	A	0.778	0.2489405	0.1059083	0.02165449	0.01771147	0.02300621
3	3_4753712_A_G	4753712	0	72	G	A	0.375	0.2405586	0.09138131	0.01048176	0.008209188	0.01202928
3	3_6828348_A_C	6828348	0	72	C	A	0.104	-0.4544069	0.1413966	0.002004589	0.001419324	0.002975698
3	3_8701430_T_C	8701430	0	72	C	T	0.292	-0.2382573	0.08915136	0.009415839	0.007326848	0.01095052
3	3_8784061_G_A	8784061	0	72	A	G	0.174	-0.2911939	0.1204985	0.0183564	0.01486721	0.01980901
3	3_8932189_C_T	8932189	0	72	T	C	0.639	-0.2448021	0.1033287	0.02067454	0.01686355	0.02205879
3	3_9074617_C_T	9074617	0	72	T	C	0.389	0.2518148	0.07794303	0.001903879	0.001343742	0.002853967
3	3_9739329_C_T	9739329	0	72	T	C	0.035	0.5270548	0.2317354	0.02610262	0.02158697	0.0272852
3	3_9739693_C_T	9739693	0	72	T	C	0.035	0.5270548	0.2317354	0.02610262	0.02158697	0.0272852
3	3_9984855_C_T	9984855	0	72	T	C	0.028	-0.5928471	0.2760409	0.03530622	0.02972137	0.03606305
3	3_10219729_A_G	10219729	0	72	G	A	0.757	-0.2221818	0.09333725	0.02010158	0.01636885	0.0215039
3	3_10342876_C_T	10342876	0	72	T	C	0.604	0.2030395	0.09230225	0.0312289	0.02610055	0.03218394
3	3_10413601_G_A	10413601	0	72	A	G	0.097	0.3296882	0.1374957	0.01924463	0.0156305	0.02067258
3	3_10427116_TA_TAA	10427116	0	72	TAA	TA	0.083	-0.3692954	0.1617657	0.0255677	0.02111876	0.02677223
3	3_10442779_C_T	10442779	0	72	T	C	0.278	-0.2218583	0.08898516	0.01509874	0.01208703	0.01662191
3	3_10916613_C_T	10916613	0	72	T	C	0.028	0.5466726	0.2534921	0.03457863	0.02907341	0.03537172
3	3_11301532_G_A	11301532	0	72	A	G	0.028	0.6510453	0.2800644	0.0230855	0.01895365	0.02438637
3	3_11487907_G_C	11487907	0	72	C	G	0.028	0.6510453	0.2800644	0.0230855	0.01895365	0.02438637
3	3_11874577_T_C	11874577	0	72	C	T	0.035	-0.5605094	0.2301722	0.01751265	0.01414414	0.01898671
3	3_12791172_T_C	12791172	0	72	C	T	0.576	0.1995535	0.08504217	0.02187044	0.01789863	0.02321473
3	3_12810651_A_C	12810651	0	72	C	A	0.028	0.5459961	0.2532297	0.03461405	0.02910493	0.03540538
3	3_12851841_G_A	12851841	0	72	A	G	0.028	0.5459961	0.2532297	0.03461405	0.02910493	0.03540538
3	3_13678173_G_T	13678173	0	72	T	G	0.576	-0.1748395	0.08099313	0.03440628	0.02892003	0.0352079
3	3_13679203_G_A	13679203	0	72	A	G	0.382	-0.18752	0.08759863	0.03588903	0.03024094	0.03661656
3	3_14964043_C_T	14964043	0	72	T	C	0.028	0.5466891	0.2534984	0.03457767	0.02907256	0.03537081
3	3_15132745_T_A	15132745	0	72	A	T	0.076	-0.3970793	0.1606862	0.01597859	0.01283475	0.01748615
3	3_15132746_T_A	15132746	0	72	A	T	0.076	-0.3970793	0.1606862	0.01597859	0.01283475	0.01748615
3	3_15717614_G_A	15717614	0	72	A	G	0.132	-0.3073944	0.1137416	0.008681389	0.006722296	0.01020171
3	3_15717693_G_A	15717693	0	72	A	G	0.486	-0.2358548	0.08817603	0.009357336	0.007278586	0.01089105
3	3_15718652_T_A	15718652	0	72	A	T	0.514	-0.2514001	0.08520003	0.004346006	0.003226729	0.00564134
3	3_15737689_G_A	15737689	0	72	A	G	0.528	-0.2328404	0.08645667	0.008905695	0.00690662	0.01043092
3	3_15752830_T_C	15752830	0	72	C	T	0.486	-0.2358548	0.08817603	0.009357336	0.007278586	0.01089105
3	3_15753641_A_G	15753641	0	72	G	A	0.486	-0.2358548	0.08817603	0.009357336	0.007278586	0.01089105
3	3_15756215_A_T	15756215	0	72	T	A	0.583	-0.1984332	0.08629791	0.02455952	0.02023784	0.02580433
3	3_15807725_T_A	15807725	0	72	A	T	0.493	-0.2437848	0.08700262	0.006608738	0.005033525	0.008057802
3	3_15900950_C_CGCCGCT	15900950	0	72	CGCCGCT	C	0.111	-0.3127223	0.1192947	0.01079453	0.008469127	0.01234422
3	3_15900973_A_C	15900973	0	72	C	A	0.493	-0.2672961	0.08542769	0.002583914	0.001858309	0.0036609
3	3_16645871_G_C	16645871	0	72	C	G	0.083	-0.3532283	0.1571636	0.02785449	0.02312419	0.02896258
3	3_17418001_T_TA	17418001	0	72	TA	T	0.049	-0.4311231	0.1956821	0.03097336	0.02587449	0.03194038
3	3_27386045_A_C	27386045	0	72	C	A	0.062	-0.3839289	0.1772176	0.03378679	0.02836912	0.03461893
3	3_32200957_TA_T	32200957	0	72	T	TA	0.097	-0.293252	0.1346445	0.03287984	0.02756359	0.03375615
3	3_33063050_A_G	33063050	0	72	G	A	0.25	0.2411789	0.09530609	0.01370732	0.01090984	0.01524898
3	3_33087842_C_G	33087842	0	72	G	C	0.215	0.2289603	0.102845	0.02931328	0.02440851	0.03035663
3	3_33087914_G_C	33087914	0	72	C	G	0.222	0.2346606	0.09793762	0.01933115	0.01570496	0.0207566
3	3_33107060_A_G	33107060	0	72	G	A	0.16	0.3270268	0.1231519	0.009856545	0.007690971	0.01139761
3	3_33138544_A_G	33138544	0	72	G	A	0.833	-0.2967024	0.1232615	0.01880031	0.01524842	0.02024085
3	3_33174156_T_G	33174156	0	72	G	T	0.375	-0.2800442	0.08506226	0.001578864	0.001101552	0.002454429
3	3_33174168_G_A	33174168	0	72	A	G	0.375	-0.2800442	0.08506226	0.001578864	0.001101552	0.002454429
3	3_33175854_A_G	33175854	0	72	G	A	0.375	-0.2800442	0.08506226	0.001578864	0.001101552	0.002454429
3	3_33626186_GA_G	33626186	0	72	G	GA	0.264	-0.3013275	0.114328	0.01039354	0.008135949	0.01194032
3	3_33725727_G_T	33725727	0	72	T	G	0.188	0.2256839	0.1050409	0.03523566	0.0296585	0.03599602
3	3_36587541_C_G	36587541	0	72	G	C	0.417	0.1816164	0.07673329	0.02079366	0.0169665	0.02217406
3	3_37033462_T_G	37033462	0	72	G	T	0.035	0.5348671	0.2273695	0.02155349	0.01762397	0.02290865
3	3_37147069_C_T	37147069	0	72	T	C	0.021	0.7139378	0.3134964	0.02591585	0.02142343	0.02710614
3	3_37774360_G_A	37774360	0	72	A	G	0.035	-0.6074342	0.2283779	0.009743481	0.00759746	0.01128305
3	3_38207265_CGCG_C	38207265	0	72	C	CGCG	0.049	0.4367174	0.1980398	0.03082492	0.02574321	0.03179887
3	3_38766825_A_G	38766825	0	72	G	A	0.056	-0.4561416	0.1840421	0.01568178	0.01258224	0.01719492
3	3_38768334_T_C	38768334	0	72	C	T	0.083	-0.429052	0.1396019	0.003044375	0.002211618	0.004190939
3	3_38791507_C_T	38791507	0	72	T	C	0.056	-0.4561416	0.1840421	0.01568178	0.01258224	0.01719492
3	3_38805130_C_G	38805130	0	72	G	C	0.069	-0.3641389	0.1486891	0.01690831	0.01362747	0.01839646
3	3_38991569_C_G	38991569	0	72	G	C	0.076	0.3888553	0.1427442	0.008186988	0.006317032	0.009694765
3	3_39225752_C_G	39225752	0	72	G	C	0.062	-0.4307743	0.1562449	0.007482412	0.005742022	0.008967777
3	3_39226436_C_T	39226436	0	72	T	C	0.062	-0.4307743	0.1562449	0.007482412	0.005742022	0.008967777
3	3_40204178_T_C	40204178	0	72	C	T	0.507	0.1988052	0.08457661	0.02165102	0.01770847	0.02300286
3	3_42226151_T_C	42226151	0	72	C	T	0.708	0.2528726	0.090296	0.006637281	0.005056587	0.008087697
3	3_42229296_G_A	42229296	0	72	A	G	0.708	0.2528726	0.090296	0.006637281	0.005056587	0.008087697
3	3_42234758_C_A	42234758	0	72	A	C	0.312	0.2201757	0.08985881	0.01685477	0.01358175	0.01834411
3	3_42236415_A_G	42236415	0	72	G	A	0.75	0.2455474	0.0980872	0.01470858	0.01175628	0.01623774
3	3_42244321_G_A	42244321	0	72	A	G	0.729	0.2648281	0.08920579	0.004126854	0.00305435	0.005401113
3	3_42251263_C_T	42251263	0	72	T	C	0.479	0.2451413	0.09084115	0.008775895	0.006799923	0.01029834
3	3_42251329_C_T	42251329	0	72	T	C	0.312	0.2201757	0.08985881	0.01685477	0.01358175	0.01834411
3	3_42299865_TG_T	42299865	0	72	T	TG	0.097	0.3054602	0.1358552	0.02779384	0.02307088	0.02890458
3	3_42728144_A_G	42728144	0	72	G	A	0.674	-0.2187696	0.09425109	0.02328468	0.01912692	0.02457819
3	3_42799858_T_A	42799858	0	72	A	T	0.951	-0.4361905	0.1978772	0.03088742	0.02579848	0.03185845
3	3_43760062_T_G	43760062	0	72	G	T	0.062	-0.451534	0.1820659	0.01561777	0.01252782	0.01713207
3	3_44345646_A_T	44345646	0	72	T	A	0.319	-0.2421716	0.08574829	0.006213563	0.004714856	0.007642639
3	3_44488656_C_A	44488656	0	72	A	C	0.021	0.6878907	0.2957097	0.0229942	0.01887426	0.02429842
3	3_44884647_C_A	44884647	0	72	A	C	0.417	0.179899	0.07889142	0.02572777	0.0212588	0.02692577
3	3_45677572_A_G	45677572	0	72	G	A	0.076	0.3560043	0.1661027	0.03567136	0.03004683	0.03640986
3	3_46245824_TAA_TA	46245824	0	72	TA	TAA	0.285	0.2622026	0.1214464	0.03438181	0.02889826	0.03518464
3	3_46487787_TTTGCACCCTTAAAATTA_T	46487787	0	72	T	TTTGCACCCTTAAAATTA	0.438	0.1827615	0.08272798	0.03053378	0.02548586	0.03152127
3	3_47087852_T_A	47087852	0	72	A	T	0.049	-0.4348957	0.19479	0.02886896	0.02401693	0.02993227
3	3_47807196_T_G	47807196	0	72	G	T	0.028	-0.5890302	0.2527417	0.02275042	0.01866238	0.02406353
3	3_47860864_G_C	47860864	0	72	C	G	0.028	-0.5890302	0.2527417	0.02275042	0.01866238	0.02406353
3	3_48282494_T_C	48282494	0	72	C	T	0.25	-0.2395345	0.09982914	0.01916569	0.01556258	0.02059592
3	3_48282651_TGCGC_T	48282651	0	72	T	TGCGC	0.25	-0.2395345	0.09982914	0.01916569	0.01556258	0.02059592
3	3_48282695_A_G	48282695	0	72	G	A	0.25	-0.2395345	0.09982914	0.01916569	0.01556258	0.02059592
3	3_48299439_T_C	48299439	0	72	C	T	0.306	-0.2371464	0.09237296	0.01245453	0.009855908	0.01400533
3	3_48309828_C_G	48309828	0	72	G	C	0.25	-0.2395345	0.09982914	0.01916569	0.01556258	0.02059592
3	3_48515079_C_T	48515079	0	72	T	C	0.465	0.1803525	0.08076511	0.02884047	0.02399184	0.02990506
3	3_48607242_A_G	48607242	0	72	G	A	0.056	-0.4706476	0.1917891	0.01669474	0.01344515	0.0181876
3	3_48625266_T_C	48625266	0	72	C	T	0.736	-0.2011708	0.0851681	0.02104402	0.01718298	0.02241624
3	3_48668170_C_G	48668170	0	72	G	C	0.035	0.5349417	0.2273926	0.02154874	0.01761986	0.02290407
3	3_48845057_GTA_G	48845057	0	72	G	GTA	0.042	0.5744321	0.2464181	0.02271866	0.01863479	0.02403293
3	3_48982335_C_T	48982335	0	72	T	C	0.069	0.3755834	0.1706182	0.03111155	0.02599672	0.0320721
3	3_49055788_G_T	49055788	0	72	T	G	0.104	-0.2963838	0.1324045	0.0284675	0.02366343	0.02954867
3	3_49148890_T_C	49148890	0	72	C	T	0.722	-0.26681	0.08661558	0.002982397	0.002163862	0.004120221
3	3_49154326_G_A	49154326	0	72	A	G	0.042	0.5744321	0.2464181	0.02271866	0.01863479	0.02403293
3	3_49210732_A_C	49210732	0	72	C	A	0.75	-0.264342	0.09812814	0.00888887	0.006892784	0.01041375
3	3_49213030_T_C	49213030	0	72	C	T	0.132	-0.2682861	0.1251925	0.03569543	0.03006829	0.03643271
3	3_49215966_C_T	49215966	0	72	T	C	0.132	-0.2682861	0.1251925	0.03569543	0.03006829	0.03643271
3	3_49269758_G_T	49269758	0	72	T	G	0.688	-0.2726648	0.08852074	0.002983776	0.002164924	0.004121797
3	3_49298139_G_A	49298139	0	72	A	G	0.736	-0.2195425	0.09329095	0.02150561	0.0175825	0.0228624
3	3_49298205_T_C	49298205	0	72	C	T	0.674	-0.305742	0.08727025	0.0008170576	0.0005472566	0.001459052
3	3_49463926_A_G	49463926	0	72	G	A	0.979	-0.7516928	0.3201385	0.02178937	0.01782835	0.02313646
3	3_49702344_T_G	49702344	0	72	G	T	0.465	0.505327	0.2266849	0.02910764	0.02422723	0.03016025
3	3_49947962_C_A	49947962	0	72	A	C	0.021	0.7139378	0.3134964	0.02591585	0.02142343	0.02710614
3	3_50085786_G_A	50085786	0	72	A	G	0.021	0.7139378	0.3134964	0.02591585	0.02142343	0.02710614
3	3_50102823_G_A	50102823	0	72	A	G	0.021	0.7139378	0.3134964	0.02591585	0.02142343	0.02710614
3	3_51460031_G_C	51460031	0	72	C	G	0.118	0.3627888	0.1351897	0.009139508	0.00709905	0.01066935
3	3_52269228_G_A	52269228	0	72	A	G	0.056	-0.4159904	0.1451364	0.005524298	0.004161981	0.006912303
3	3_52393442_C_G	52393442	0	72	G	C	0.076	-0.3930325	0.1322247	0.004082855	0.003019807	0.005352714
3	3_52407041_C_T	52407041	0	72	T	C	0.271	0.2337774	0.1040087	0.02784436	0.02311528	0.02895289
3	3_52414273_G_A	52414273	0	72	A	G	0.035	-0.52588	0.2288608	0.02465459	0.02032082	0.02589566
3	3_52419291_C_G	52419291	0	72	G	C	0.035	-0.52588	0.2288608	0.02465459	0.02032082	0.02589566
3	3_52426884_C_T	52426884	0	72	T	C	0.035	-0.52588	0.2288608	0.02465459	0.02032082	0.02589566
3	3_52432033_C_T	52432033	0	72	T	C	0.035	-0.52588	0.2288608	0.02465459	0.02032082	0.02589566
3	3_52441606_A_T	52441606	0	72	T	A	0.035	-0.52588	0.2288608	0.02465459	0.02032082	0.02589566
3	3_52453893_C_T	52453893	0	72	T	C	0.965	0.52588	0.2288608	0.02465459	0.02032082	0.02589566
3	3_52489564_A_T	52489564	0	72	T	A	0.958	0.5083664	0.2086214	0.01744104	0.01408286	0.01891682
3	3_52492085_G_A	52492085	0	72	A	G	0.958	0.5083781	0.2086223	0.01743901	0.01408112	0.01891485
3	3_52492707_T_C	52492707	0	72	C	T	0.958	0.5083781	0.2086223	0.01743901	0.01408112	0.01891485
3	3_52505758_G_GAT	52505758	0	72	GAT	G	0.965	0.52588	0.2288608	0.02465459	0.02032082	0.02589566
3	3_52506282_A_G	52506282	0	72	G	A	0.965	0.52588	0.2288608	0.02465459	0.02032082	0.02589566
3	3_52506426_C_T	52506426	0	72	T	C	0.965	0.52588	0.2288608	0.02465459	0.02032082	0.02589566
3	3_52506491_A_G	52506491	0	72	G	A	0.965	0.52588	0.2288608	0.02465459	0.02032082	0.02589566
3	3_52512318_A_G	52512318	0	72	G	A	0.965	0.52588	0.2288608	0.02465459	0.02032082	0.02589566
3	3_52513940_T_C	52513940	0	72	C	T	0.965	0.52588	0.2288608	0.02465459	0.02032082	0.02589566
3	3_52518483_G_C	52518483	0	72	C	G	0.208	-0.2403693	0.1113454	0.03440021	0.02891463	0.03520213
3	3_52518488_A_C	52518488	0	72	C	A	0.208	-0.2683256	0.1171725	0.02512914	0.02073531	0.02635137
3	3_52518492_A_C	52518492	0	72	C	A	0.208	-0.2683256	0.1171725	0.02512914	0.02073531	0.02635137
3	3_52518499_CTG_C	52518499	0	72	C	CTG	0.021	0.6797994	0.2972716	0.02532649	0.02090781	0.02654079
3	3_52518786_T_C	52518786	0	72	C	T	0.965	0.52588	0.2288608	0.02465459	0.02032082	0.02589566
3	3_52522659_T_C	52522659	0	72	C	T	0.965	0.52588	0.2288608	0.02465459	0.02032082	0.02589566
3	3_52545837_C_T	52545837	0	72	T	C	0.035	-0.5241143	0.2286117	0.02497084	0.02059699	0.0261994
3	3_52557445_G_A	52557445	0	72	A	G	0.049	-0.5783937	0.1910502	0.003482201	0.002550597	0.004685694
3	3_52561779_C_T	52561779	0	72	T	C	0.507	0.2008848	0.08749778	0.02477119	0.02042261	0.02600766
3	3_52860816_C_T	52860816	0	72	T	C	0.125	0.3916439	0.1227439	0.00214814	0.001527457	0.003147745
3	3_52868670_G_A	52868670	0	72	A	G	0.861	0.3605513	0.132447	0.008229731	0.006352013	0.009738692
3	3_52889358_G_A	52889358	0	72	A	G	0.146	-0.2873444	0.1285648	0.02870474	0.02387229	0.02977538
3	3_53761071_G_C	53761071	0	72	C	G	0.021	0.6879679	0.2957178	0.02298305	0.01886457	0.02428768
3	3_53837619_G_T	53837619	0	72	T	G	0.139	-0.3639631	0.1506066	0.01835314	0.01486442	0.01980584
3	3_53910120_AAG_A	53910120	0	72	A	AAG	0.028	0.5611259	0.2527209	0.02973189	0.02477773	0.03075625
3	3_54952355_T_TTTC	54952355	0	72	TTTC	T	0.083	-0.3435944	0.1321583	0.01142959	0.00899827	0.01298168
3	3_55504730_A_G	55504730	0	72	G	A	0.604	0.1943416	0.08513079	0.02557038	0.0211211	0.0267748
3	3_55754162_T_C	55754162	0	72	C	T	0.458	-0.3206866	0.1243633	0.01208838	0.009549027	0.01364033
3	3_56591422_G_C	56591422	0	72	C	G	0.083	-0.3564146	0.1594675	0.02870386	0.02387152	0.02977454
3	3_56593757_C_G	56593757	0	72	G	C	0.083	-0.3564146	0.1594675	0.02870386	0.02387152	0.02977454
3	3_56650051_A_ACTT	56650051	0	72	ACTT	A	0.375	0.2423917	0.08717277	0.007012829	0.005360565	0.008479953
3	3_58062611_C_A	58062611	0	72	A	C	0.049	0.4824448	0.1993672	0.01820388	0.01473636	0.01966052
3	3_58625813_G_A	58625813	0	72	A	G	0.035	0.5347557	0.2273348	0.02156052	0.01763007	0.02291545
3	3_58631419_GAGGGCCAGGGCT_G	58631419	0	72	G	GAGGGCCAGGGCT	0.035	0.5347557	0.2273348	0.02156052	0.01763007	0.02291545
3	3_58720222_G_A	58720222	0	72	A	G	0.056	-0.4074475	0.1839077	0.03007743	0.02508274	0.03108597
3	3_58720366_T_C	58720366	0	72	C	T	0.097	-0.3693947	0.150528	0.01669439	0.01344484	0.01818725
3	3_58722820_C_G	58722820	0	72	G	C	0.097	-0.3693947	0.150528	0.01669439	0.01344484	0.01818725
3	3_58792086_T_A	58792086	0	72	A	T	0.056	-0.4074475	0.1839077	0.03007743	0.02508274	0.03108597
3	3_58834720_T_A	58834720	0	72	A	T	0.056	-0.4074475	0.1839077	0.03007743	0.02508274	0.03108597
3	3_58899633_A_T	58899633	0	72	T	A	0.132	-0.3614349	0.1403675	0.01220687	0.009648277	0.01375852
3	3_62189437_G_C	62189437	0	72	C	G	0.215	-0.2509541	0.1011198	0.01555008	0.01247029	0.0170656
3	3_62450931_T_A	62450931	0	72	A	T	0.056	-0.4594402	0.184497	0.01521474	0.01218547	0.01673601
3	3_64554385_GA_G	64554385	0	72	G	GA	0.035	0.495286	0.2279813	0.03330821	0.02794389	0.03416373
3	3_65352628_G_A	65352628	0	72	A	G	0.09	0.4361837	0.1913699	0.02579452	0.02131723	0.02698979
3	3_65353545_C_T	65353545	0	72	T	C	0.042	-0.388554	0.1786779	0.03314213	0.02779642	0.03400573
3	3_65387058_G_A	65387058	0	72	A	G	0.035	-0.5455755	0.224338	0.01765707	0.01426776	0.0191276
3	3_65583591_A_G	65583591	0	72	G	A	0.028	-0.6638734	0.2547084	0.01123356	0.008834741	0.01278518
3	3_65607592_T_TCA	65607592	0	72	TCA	T	0.354	-0.2053094	0.08289456	0.01575068	0.01264083	0.01726255
3	3_66413203_C_G	66413203	0	72	G	C	0.035	0.4956659	0.227927	0.03313715	0.027792	0.03400099
3	3_66419760_A_T	66419760	0	72	T	A	0.069	-0.3786003	0.1693388	0.02865379	0.02382743	0.0297267
3	3_66432946_T_TG	66432946	0	72	TG	T	0.028	-0.5902981	0.2581748	0.02534918	0.02092765	0.02656256
3	3_67570853_A_G	67570853	0	72	G	A	0.021	0.721875	0.3149024	0.0249842	0.02060866	0.02621222
3	3_69082657_T_C	69082657	0	72	C	T	0.326	-0.2220542	0.08189883	0.008477522	0.006555014	0.00999297
3	3_69106304_C_T	69106304	0	72	T	C	0.347	-0.2221534	0.07988089	0.00700376	0.005353213	0.008470504
3	3_69112658_CA_C	69112658	0	72	C	CA	0.16	0.2767032	0.1252214	0.03049549	0.02545202	0.03148475
3	3_69171496_GAGA_G	69171496	0	72	G	GAGA	0.028	0.6127886	0.2520099	0.01767181	0.01428039	0.01914198
3	3_69232051_C_T	69232051	0	72	T	C	0.042	-0.600518	0.2118947	0.006045549	0.004579733	0.007465376
3	3_69245454_T_C	69245454	0	72	C	T	0.972	-0.6462061	0.2792087	0.02367213	0.01946418	0.02495111
3	3_69246129_A_G	69246129	0	72	G	A	0.028	-0.5735538	0.253229	0.02670564	0.02211546	0.02786301
3	3_69247985_A_G	69247985	0	72	G	A	0.042	0.6161769	0.2538138	0.0178487	0.01443189	0.01931446
3	3_69336795_CT_C	69336795	0	72	C	CT	0.188	0.2594879	0.1187452	0.03231914	0.02706622	0.03322244
3	3_69359728_CACACAGAGAGAGAGAG_C	69359728	0	72	C	CACACAGAGAGAGAGAG	0.111	0.4004698	0.1383433	0.005096688	0.003821032	0.006454692
3	3_69359736_G_C	69359736	0	72	C	G	0.451	-0.2566014	0.106776	0.01898679	0.01540872	0.02042211
3	3_75475588_C_T	75475588	0	72	T	C	0.16	0.2628478	0.1196844	0.0314933	0.02633457	0.03243589
3	3_75680079_G_T	75680079	0	72	T	G	0.021	0.679541	0.2971717	0.02533267	0.02091321	0.02654672
3	3_78717508_G_A	78717508	0	72	A	G	0.576	-0.2377701	0.0858361	0.007219626	0.005528371	0.008695131
3	3_81792592_T_C	81792592	0	72	C	T	0.674	0.1967308	0.08897421	0.03039486	0.0253631	0.03138878
3	3_85156727_CTTTCTTTCT_C	85156727	0	72	C	CTTTCTTTCT	0.438	0.203948	0.09228817	0.03048156	0.02543971	0.03147147
3	3_96533874_C_T	96533874	0	72	T	C	0.035	-0.4817548	0.2191929	0.03136771	0.02622339	0.03231622
3	3_97364939_A_G	97364939	0	72	G	A	0.09	-0.3685517	0.1526339	0.01844763	0.01494552	0.01989781
3	3_97365038_G_A	97365038	0	72	A	G	0.632	-0.2437203	0.08252471	0.004313792	0.003201357	0.005606114
3	3_97365074_A_G	97365074	0	72	G	A	0.632	-0.2437203	0.08252471	0.004313792	0.003201357	0.005606114
3	3_97367230_C_CA	97367230	0	72	CA	C	0.639	-0.2289116	0.08264343	0.007223158	0.00553124	0.008698801
3	3_97868258_C_T	97868258	0	72	T	C	0.021	0.7461195	0.303898	0.01664462	0.01340237	0.01813856
3	3_97868418_T_C	97868418	0	72	C	T	0.021	0.7461195	0.303898	0.01664462	0.01340237	0.01813856
3	3_97868529_G_A	97868529	0	72	A	G	0.021	0.7461195	0.303898	0.01664462	0.01340237	0.01813856
3	3_97868532_G_T	97868532	0	72	T	G	0.021	0.7461195	0.303898	0.01664462	0.01340237	0.01813856
3	3_97868538_G_C	97868538	0	72	C	G	0.021	0.7461195	0.303898	0.01664462	0.01340237	0.01813856
3	3_97868547_C_T	97868547	0	72	T	C	0.021	0.7461195	0.303898	0.01664462	0.01340237	0.01813856
3	3_97868548_A_G	97868548	0	72	G	A	0.021	0.7461195	0.303898	0.01664462	0.01340237	0.01813856
3	3_97868559_G_A	97868559	0	72	A	G	0.021	0.7461195	0.303898	0.01664462	0.01340237	0.01813856
3	3_97868703_C_T	97868703	0	72	T	C	0.021	0.7461195	0.303898	0.01664462	0.01340237	0.01813856
3	3_97868710_G_A	97868710	0	72	A	G	0.021	0.7461195	0.303898	0.01664462	0.01340237	0.01813856
3	3_97868712_A_T	97868712	0	72	T	A	0.021	0.7461195	0.303898	0.01664462	0.01340237	0.01813856
3	3_97868720_T_A	97868720	0	72	A	T	0.021	0.7461195	0.303898	0.01664462	0.01340237	0.01813856
3	3_97868725_C_T	97868725	0	72	T	C	0.021	0.7461195	0.303898	0.01664462	0.01340237	0.01813856
3	3_97868738_A_G	97868738	0	72	G	A	0.021	0.7461195	0.303898	0.01664462	0.01340237	0.01813856
3	3_97868739_C_T	97868739	0	72	T	C	0.021	0.7461195	0.303898	0.01664462	0.01340237	0.01813856
3	3_97868856_T_C	97868856	0	72	C	T	0.021	0.7461195	0.303898	0.01664462	0.01340237	0.01813856
3	3_97868931_G_A	97868931	0	72	A	G	0.021	0.7461195	0.303898	0.01664462	0.01340237	0.01813856
3	3_97868938_G_A	97868938	0	72	A	G	0.021	0.7461195	0.303898	0.01664462	0.01340237	0.01813856
3	3_97869111_C_A	97869111	0	72	A	C	0.021	0.7461195	0.303898	0.01664462	0.01340237	0.01813856
3	3_97869191_C_T	97869191	0	72	T	C	0.021	0.7461195	0.303898	0.01664462	0.01340237	0.01813856
3	3_97869211_G_A	97869211	0	72	A	G	0.021	0.7461195	0.303898	0.01664462	0.01340237	0.01813856
3	3_97869444_A_G	97869444	0	72	G	A	0.021	0.7461195	0.303898	0.01664462	0.01340237	0.01813856
3	3_97887853_A_T	97887853	0	72	T	A	0.021	0.7461195	0.303898	0.01664462	0.01340237	0.01813856
3	3_97887864_C_T	97887864	0	72	T	C	0.042	0.5169856	0.2357826	0.03175868	0.02656957	0.03268871
3	3_98507134_C_A	98507134	0	72	A	C	0.111	-0.3062441	0.1396689	0.03175825	0.02656918	0.03268829
3	3_100174886_A_G	100174886	0	72	G	A	0.028	0.666367	0.2827565	0.02132635	0.01742729	0.02268918
3	3_100493422_G_A	100493422	0	72	A	G	0.146	0.3060428	0.1183928	0.0118879	0.009381233	0.01344016
3	3_100497098_C_T	100497098	0	72	T	C	0.146	0.3060428	0.1183928	0.0118879	0.009381233	0.01344016
3	3_100539887_C_T	100539887	0	72	T	C	0.188	0.2251336	0.1002674	0.02800167	0.0232536	0.02910334
3	3_100551066_G_T	100551066	0	72	T	G	0.167	0.2414647	0.1095496	0.03090138	0.02581082	0.03187176
3	3_100567799_C_T	100567799	0	72	T	C	0.25	-0.2174561	0.09768426	0.02932404	0.02441799	0.0303669
3	3_100567811_A_T	100567811	0	72	T	A	0.25	-0.2174561	0.09768426	0.02932404	0.02441799	0.0303669
3	3_100583651_GA_G	100583651	0	72	G	GA	0.326	0.1878294	0.08547564	0.03139725	0.02624955	0.03234437
3	3_101066565_C_CA	101066565	0	72	CA	C	0.049	0.5555786	0.189074	0.004501477	0.003349338	0.00581095
3	3_101231863_GCTGCCGC_G	101231863	0	72	G	GCTGCCGC	0.028	-0.5720356	0.251071	0.0258503	0.02136604	0.02704328
3	3_101446207_AAT_A	101446207	0	72	A	AAT	0.389	0.2057691	0.09528267	0.03433614	0.02885763	0.03514123
3	3_105588069_G_A	105588069	0	72	A	G	0.722	-0.3179253	0.09732013	0.001706407	0.001196261	0.002612531
3	3_107647012_C_A	107647012	0	72	A	C	0.028	0.6299692	0.2763198	0.02575788	0.02128515	0.02695465
3	3_108156633_A_AAAAG	108156633	0	72	AAAAG	A	0.868	0.3497095	0.1318874	0.009960033	0.007776616	0.01150237
3	3_108158574_C_T	108158574	0	72	T	C	0.785	0.2911907	0.1090791	0.009491284	0.007389112	0.01102717
3	3_108172817_C_T	108172817	0	72	T	C	0.771	0.2647745	0.1049664	0.01399878	0.01115586	0.01553724
3	3_108179063_T_C	108179063	0	72	C	T	0.132	-0.2913222	0.1243273	0.02205183	0.01805592	0.02338982
3	3_108179219_CAA_C	108179219	0	72	C	CAA	0.097	-0.3435236	0.1523283	0.02734651	0.02267787	0.02847659
3	3_111667901_G_A	111667901	0	72	A	G	0.021	0.7431478	0.3186459	0.02265834	0.01858238	0.02397478
3	3_112358658_C_T	112358658	0	72	T	C	0.028	0.704092	0.2755342	0.01284893	0.01018705	0.01439769
3	3_112996801_G_A	112996801	0	72	A	G	0.042	0.4474828	0.1795081	0.01511341	0.01209948	0.01663635
3	3_113207968_CT_C	113207968	0	72	C	CT	0.062	-0.4731229	0.1711547	0.007334729	0.005621896	0.008814659
3	3_113300351_T_G	113300351	0	72	G	T	0.278	0.2002339	0.09302395	0.03490998	0.0293684	0.0356866
3	3_113320596_TG_T	113320596	0	72	T	TG	0.049	0.4736812	0.1968171	0.01881878	0.0152643	0.02025881
3	3_113442198_C_A	113442198	0	72	A	C	0.333	0.2077856	0.09656188	0.03496394	0.02941645	0.03573787
3	3_113464859_A_G	113464859	0	72	G	A	0.333	0.2077856	0.09656188	0.03496394	0.02941645	0.03573787
3	3_113499733_A_G	113499733	0	72	G	A	0.333	0.2478517	0.09529012	0.01139481	0.008969247	0.01294683
3	3_113503354_A_G	113503354	0	72	G	A	0.34	0.2253064	0.09620986	0.02212646	0.01812065	0.02346182
3	3_113522544_T_C	113522544	0	72	C	T	0.333	0.2478517	0.09529012	0.01139481	0.008969247	0.01294683
3	3_113557690_G_A	113557690	0	72	A	G	0.215	-0.2615168	0.1074439	0.01756559	0.01418945	0.01903837
3	3_113720517_T_A	113720517	0	72	A	T	0.104	-0.4069541	0.1405577	0.005089076	0.003814977	0.006446511
3	3_113785149_ATATGT_A	113785149	0	72	A	ATATGT	0.111	-0.3575145	0.1395711	0.01264365	0.01001462	0.01419357
3	3_113850443_A_G	113850443	0	72	G	A	0.021	-0.6576741	0.3026948	0.03328903	0.02792686	0.03414549
3	3_116746298_G_C	116746298	0	72	C	G	0.34	0.2290308	0.0787255	0.004891691	0.00365818	0.006233927
3	3_118878869_T_G	118878869	0	72	G	T	0.028	0.5461287	0.2510771	0.03310009	0.02775909	0.03396573
3	3_119205541_C_T	119205541	0	72	T	C	0.208	-0.2570813	0.110574	0.02306605	0.01893674	0.02436764
3	3_119209658_A_G	119209658	0	72	G	A	0.208	-0.2570813	0.110574	0.02306605	0.01893674	0.02436764
3	3_119545408_T_C	119545408	0	72	C	T	0.035	-0.536193	0.2368721	0.02679119	0.02219048	0.02794494
3	3_120115864_T_C	120115864	0	72	C	T	0.021	0.7516928	0.3201385	0.02178937	0.01782835	0.02313646
3	3_120500562_CT_TT	120500562	0	72	TT	CT	0.049	-0.4367113	0.1949641	0.02836605	0.02357414	0.02945171
3	3_120673980_T_G	120673980	0	72	G	T	0.132	0.3014784	0.1162159	0.01160453	0.009144349	0.01315684
3	3_121186451_T_C	121186451	0	72	C	T	0.035	-0.5631617	0.2261791	0.01522802	0.01219675	0.01674908
3	3_122471427_C_A	122471427	0	72	A	C	0.021	-0.6481659	0.2941471	0.03094669	0.02585089	0.03191495
[truncated: 8,001 more rows]
