# Supplementary material for: Genomic Markers Associated with Cytomegalovirus DNAemia in Kidney Transplant Recipients
Source: Viruses. 2023 Nov 8;15(11):2227. doi: 10.3390/v15112227 (PMC10674338; doi:10.3390/v15112227)
Supplement: Supplementary file 1 [file viruses-15-02227-s001.zip › S3_dnaemia.cohortB.assoc.txt]

chr	rs	ps	n_mis	n_obs	allele1	allele0	af	beta	se	p_wald	p_lrt	p_score
1	1_878314_G_C	878314	0	126	C	G	0.103	0.2368996	0.1090975	0.03183263	0.02882503	0.03231011
1	1_879066_T_A	879066	0	126	A	T	0.048	0.3005983	0.1513368	0.04924311	0.04522599	0.04919467
1	1_882033_G_A	882033	0	126	A	G	0.234	-0.2235775	0.0755672	0.003712191	0.00312837	0.004369768
1	1_892471_G_A	892471	0	126	A	G	0.02	0.5166996	0.2508032	0.04150772	0.03791183	0.04170198
1	1_897641_C_T	897641	0	126	T	C	0.016	0.5379334	0.2516953	0.03457431	0.03139215	0.03497485
1	1_900397_C_T	900397	0	126	T	C	0.016	0.5379334	0.2516953	0.03457431	0.03139215	0.03497485
1	1_900505_G_C	900505	0	126	C	G	0.282	-0.1793588	0.07624591	0.02025503	0.01807084	0.02100516
1	1_902108_C_T	902108	0	126	T	C	0.028	0.4019011	0.1928617	0.03925806	0.03579235	0.03952075
1	1_906272_A_C	906272	0	126	C	A	0.107	0.3352411	0.1019581	0.001318402	0.001072354	0.001737292
1	1_907609_T_C	907609	0	126	C	T	0.036	0.5617335	0.1764615	0.001847635	0.001520356	0.002339917
1	1_907622_G_C	907622	0	126	C	G	0.036	0.5617335	0.1764615	0.001847635	0.001520356	0.002339917
1	1_908170_C_G	908170	0	126	G	C	0.036	0.5617335	0.1764615	0.001847635	0.001520356	0.002339917
1	1_908414_C_T	908414	0	126	T	C	0.04	0.4435395	0.1690514	0.009808648	0.00854209	0.01064267
1	1_909073_C_T	909073	0	126	T	C	0.425	0.2210512	0.06506201	0.0009187087	0.0007380026	0.001267066
1	1_909221_T_C	909221	0	126	C	T	0.056	-0.2829885	0.140846	0.04672248	0.04283838	0.04675412
1	1_909238_G_C	909238	0	126	C	G	0.627	0.2116157	0.06908117	0.002694448	0.002246004	0.003275126
1	1_909242_A_G	909242	0	126	G	A	0.04	0.4435358	0.1690489	0.009808195	0.008541682	0.01064221
1	1_914333_C_G	914333	0	126	G	C	0.587	0.1989425	0.06218413	0.001756041	0.001442466	0.002236857
1	1_914852_G_C	914852	0	126	C	G	0.571	0.1817945	0.06292471	0.004573529	0.003881685	0.005279694
1	1_914940_T_C	914940	0	126	C	T	0.567	0.1760844	0.06357212	0.00648568	0.005570089	0.00726436
1	1_915264_G_A	915264	0	126	A	G	0.012	0.5634714	0.2908487	0.05501571	0.05070795	0.05478149
1	1_916549_A_G	916549	0	126	G	A	0.722	0.1905997	0.07037166	0.007731059	0.006679114	0.008538691
1	1_935222_C_A	935222	0	126	A	C	0.587	0.1410133	0.06453071	0.03078386	0.02784485	0.03128986
1	1_955597_G_T	955597	0	126	T	G	0.321	-0.1310361	0.06727377	0.05373539	0.04949048	0.05354258
1	1_982403_C_T	982403	0	126	T	C	0.024	0.544639	0.2061715	0.009329935	0.008111558	0.0101599
1	1_984302_T_C	984302	0	126	C	T	0.563	0.1458788	0.06683402	0.03097277	0.02802133	0.03147367
1	1_984494_GC_G	984494	0	126	G	GC	0.536	0.1280361	0.05830036	0.02997229	0.02708709	0.03049996
1	1_985266_C_T	985266	0	126	T	C	0.544	0.1331262	0.06614175	0.04634358	0.04247982	0.0463872
1	1_985460_T_C	985460	0	126	C	T	0.06	0.356734	0.1391114	0.01154888	0.01011279	0.01238942
1	1_990280_C_T	990280	0	126	T	C	0.706	0.2326736	0.073407	0.001929835	0.001590368	0.002432032
1	1_990380_C_T	990380	0	126	T	C	0.282	-0.2654894	0.07198072	0.0003383528	0.0002625463	0.0005381048
1	1_990417_T_C	990417	0	126	C	T	0.294	-0.2326736	0.073407	0.001929835	0.001590368	0.002432032
1	1_1231001_G_A	1231001	0	126	A	G	0.044	-0.3130974	0.1565446	0.04771569	0.04377871	0.04771587
1	1_1260009_A_AC	1260009	0	126	AC	A	0.016	0.5809804	0.2525743	0.0231335	0.02072961	0.02382654
1	1_1354975_G_A	1354975	0	126	A	G	0.016	0.5546349	0.2511026	0.02905654	0.02623283	0.02960823
1	1_1407372_T_C	1407372	0	126	C	T	0.194	0.183374	0.08053674	0.02453449	0.0220276	0.02519663
1	1_1421157_G_A	1421157	0	126	A	G	0.016	0.5371819	0.2516942	0.03482219	0.03162457	0.03521562
1	1_1421916_T_C	1421916	0	126	C	T	0.111	0.2538032	0.1072581	0.01954258	0.01741459	0.02030531
1	1_1469521_CT_C	1469521	0	126	C	CT	0.024	-0.4885667	0.2062077	0.01939135	0.01727538	0.02015666
1	1_1551927_T_C	1551927	0	126	C	T	0.655	-0.1808851	0.06762125	0.008498919	0.007365934	0.009319093
1	1_1560100_G_A	1560100	0	126	A	G	0.31	-0.1812858	0.07371818	0.01532792	0.01354925	0.01614894
1	1_1560103_C_T	1560103	0	126	T	C	0.222	0.1838076	0.0716264	0.01149156	0.01006092	0.01233207
1	1_1562437_C_G	1562437	0	126	G	C	0.274	0.1923519	0.06574708	0.004100474	0.003467304	0.004781504
1	1_1562536_G_A	1562536	0	126	A	G	0.19	0.1578337	0.07864702	0.04697509	0.04307748	0.04699874
1	1_1562895_C_T	1562895	0	126	T	C	0.647	0.2065767	0.0666524	0.0024086	0.002000045	0.00296252
1	1_1563789_C_A	1563789	0	126	A	C	0.298	-0.171615	0.07355141	0.02127096	0.01900792	0.02200202
1	1_1564952_TG_T	1564952	0	126	T	TG	0.298	-0.171615	0.07355141	0.02127096	0.01900792	0.02200202
1	1_1573078_A_G	1573078	0	126	G	A	0.024	0.4055694	0.2089969	0.05461952	0.05033111	0.05439812
1	1_1575836_C_G	1575836	0	126	G	C	0.417	0.2763125	0.1180716	0.02089658	0.01866242	0.02163481
1	1_1599974_A_C	1599974	0	126	C	A	0.294	0.1758176	0.09047408	0.05428403	0.05001207	0.05407348
1	1_1608100_C_G	1608100	0	126	G	C	0.052	-0.4410757	0.1421026	0.002374116	0.001970438	0.002924617
1	1_1654007_A_T	1654007	0	126	T	A	0.028	-0.393045	0.1968453	0.04808162	0.04412531	0.04807018
1	1_1654011_TAC_T	1654011	0	126	T	TAC	0.02	-0.3743547	0.1921304	0.05365822	0.04941713	0.05346791
1	1_2126236_T_C	2126236	0	126	C	T	0.024	-0.5000341	0.205926	0.01663243	0.01474233	0.01743876
1	1_2237525_C_T	2237525	0	126	T	C	0.016	0.5549729	0.251102	0.02896017	0.02614298	0.02951435
1	1_2332391_C_T	2332391	0	126	T	C	0.44	-0.1669003	0.06722561	0.01439862	0.01270132	0.01522791
1	1_2338126_C_A	2338126	0	126	A	C	0.413	-0.1773832	0.06695248	0.009131233	0.007933066	0.009959184
1	1_2535561_T_C	2535561	0	126	C	T	0.02	-0.5087251	0.2260806	0.02622848	0.02360023	0.026851
1	1_3512008_G_T	3512008	0	126	T	G	0.02	-0.4906315	0.225529	0.03152305	0.02853558	0.032009
1	1_3542106_T_TG	3542106	0	126	TG	T	0.282	0.1669592	0.07097557	0.02025638	0.01807208	0.02100649
1	1_3544235_TA_T	3544235	0	126	T	TA	0.266	0.1646233	0.07594729	0.03213135	0.0291044	0.03260061
1	1_3555428_G_T	3555428	0	126	T	G	0.206	0.173674	0.08014713	0.03218285	0.02915257	0.03265069
1	1_3607520_G_A	3607520	0	126	A	G	0.381	-0.1776763	0.06814412	0.01026259	0.008950988	0.0110995
1	1_3638767_C_T	3638767	0	126	T	C	0.016	0.5370654	0.2516941	0.03486084	0.03166082	0.03525316
1	1_3638834_C_T	3638834	0	126	T	C	0.389	0.1286011	0.06466303	0.04896241	0.04495991	0.04892292
1	1_3639884_T_C	3639884	0	126	C	T	0.016	0.5526553	0.2511123	0.02963045	0.02676811	0.03016714
1	1_3662208_G_A	3662208	0	126	A	G	0.012	0.564138	0.2908435	0.05472897	0.0504352	0.05450403
1	1_3669356_G_A	3669356	0	126	A	G	0.016	-0.4991835	0.2523408	0.05015836	0.04609388	0.05008065
1	1_3698224_G_C	3698224	0	126	C	G	0.123	-0.189999	0.0969023	0.0521896	0.04802177	0.05204665
1	1_3701580_G_C	3701580	0	126	C	G	0.123	-0.1861277	0.09664306	0.05643984	0.05206319	0.05615944
1	1_3731959_C_T	3731959	0	126	T	C	0.103	-0.2551555	0.1007888	0.0126256	0.01108861	0.01346468
1	1_4847594_C_T	4847594	0	126	T	C	0.222	-0.1611502	0.07738234	0.03938452	0.0359114	0.0396434
1	1_4847845_G_A	4847845	0	126	A	G	0.643	-0.1542656	0.06286011	0.0155349	0.01373833	0.01635382
1	1_5924518_G_A	5924518	0	126	A	G	0.032	-0.5059007	0.1782661	0.005320209	0.004538633	0.006059601
1	1_5934500_T_C	5934500	0	126	C	T	0.274	-0.2063771	0.06573251	0.002122008	0.001754438	0.00264613
1	1_5935162_A_T	5935162	0	126	T	A	0.825	-0.1920372	0.08202081	0.02083719	0.01860763	0.02157655
1	1_5937091_T_C	5937091	0	126	C	T	0.901	0.3027156	0.1044928	0.004466972	0.003788213	0.005167776
1	1_5937391_C_T	5937391	0	126	T	C	0.774	0.2376252	0.07263814	0.001391901	0.001134253	0.001822132
1	1_5969139_G_A	5969139	0	126	A	G	0.016	-0.4990837	0.2523446	0.05020699	0.04614001	0.05012772
1	1_6155545_T_C	6155545	0	126	C	T	0.012	0.5654825	0.2908363	0.05415705	0.04989134	0.05395061
1	1_6170424_CG_C	6170424	0	126	C	CG	0.464	0.1271664	0.06411439	0.04956527	0.04553142	0.04950653
1	1_6278414_A_G	6278414	0	126	G	A	0.313	-0.1553955	0.06312723	0.01522863	0.01345857	0.01605063
1	1_6291918_TA_T	6291918	0	126	T	TA	0.179	-0.1804883	0.09368737	0.05636844	0.05199521	0.05609036
1	1_6305292_C_A	6305292	0	126	A	C	0.687	0.2149782	0.06651272	0.001580159	0.001293293	0.002037615
1	1_6305303_C_A	6305303	0	126	A	C	0.687	0.2149782	0.06651272	0.001580159	0.001293293	0.002037615
1	1_6313938_C_T	6313938	0	126	T	C	0.675	0.2450366	0.06110787	0.00010507	7.826648e-05	0.0002034285
1	1_6314822_T_C	6314822	0	126	C	T	0.679	0.2369278	0.0612321	0.0001766202	0.000133977	0.0003121249
1	1_6418857_G_A	6418857	0	126	A	G	0.048	-0.2786282	0.1384549	0.04637873	0.04251308	0.04642123
1	1_6473294_A_G	6473294	0	126	G	A	0.079	-0.2692151	0.12057	0.02738248	0.02467343	0.02797675
1	1_6500919_T_C	6500919	0	126	C	T	0.151	-0.1653582	0.08507358	0.05423322	0.04996376	0.05402432
1	1_6524501_T_C	6524501	0	126	C	T	0.032	-0.3991514	0.1826194	0.03074716	0.02781056	0.03125414
1	1_6525335_G_A	6525335	0	126	A	G	0.024	-0.5182389	0.2067427	0.01350248	0.01188534	0.01433777
1	1_6528468_C_T	6528468	0	126	T	C	0.04	-0.4125253	0.162153	0.01220617	0.01070815	0.01304626
1	1_6529188_C_T	6529188	0	126	T	C	0.052	-0.4425583	0.1420074	0.002282753	0.001892066	0.002823985
1	1_6529443_A_G	6529443	0	126	G	A	0.115	-0.2474326	0.09679465	0.01180733	0.01034676	0.01264787
1	1_6529748_G_T	6529748	0	126	T	G	0.04	-0.4125253	0.162153	0.01220617	0.01070815	0.01304626
1	1_6530435_A_G	6530435	0	126	G	A	0.103	-0.2083009	0.1012493	0.04178782	0.03817598	0.04197348
1	1_6531124_T_C	6531124	0	126	C	T	0.04	-0.4125253	0.162153	0.01220617	0.01070815	0.01304626
1	1_6531650_C_T	6531650	0	126	T	C	0.04	-0.4125253	0.162153	0.01220617	0.01070815	0.01304626
1	1_6533393_G_C	6533393	0	126	C	G	0.115	-0.2474326	0.09679465	0.01180733	0.01034676	0.01264787
1	1_6535048_A_G	6535048	0	126	G	A	0.044	-0.3577888	0.1419897	0.0130333	0.01145882	0.01387089
1	1_6694513_G_T	6694513	0	126	T	G	0.266	0.1739226	0.07968301	0.03097445	0.0280229	0.0314753
1	1_6694514_A_T	6694514	0	126	T	A	0.266	0.1739226	0.07968301	0.03097445	0.0280229	0.0314753
1	1_6700131_CAA_C	6700131	0	126	C	CAA	0.016	0.5537155	0.2511058	0.02932108	0.02647952	0.02986588
1	1_6705874_G_C	6705874	0	126	C	G	0.278	0.163701	0.08009527	0.0431233	0.03943616	0.04326771
1	1_7151505_G_A	7151505	0	126	A	G	0.028	0.410814	0.1923502	0.03469734	0.0315075	0.03509435
1	1_7723534_G_A	7723534	0	126	A	G	0.056	-0.3820835	0.1391522	0.006950046	0.005982852	0.007740904
1	1_7737651_G_A	7737651	0	126	A	G	0.044	-0.429858	0.1547726	0.006346443	0.005446513	0.007121117
1	1_7807913_A_G	7807913	0	126	G	A	0.044	-0.3090096	0.1571319	0.05150416	0.04737094	0.05138327
1	1_7890264_A_G	7890264	0	126	G	A	0.631	-0.1484696	0.06602496	0.0263268	0.02369161	0.02694696
1	1_8022772_CAG_C	8022772	0	126	C	CAG	0.143	-0.1839947	0.08042345	0.02386962	0.0214113	0.02454665
1	1_8029509_G_A	8029509	0	126	A	G	0.175	-0.1645241	0.07238148	0.02477478	0.02225047	0.02543145
1	1_8029510_G_A	8029510	0	126	A	G	0.183	-0.1484497	0.06923782	0.03401241	0.03086548	0.03442897
1	1_9416151_G_A	9416151	0	126	A	G	0.238	-0.1460152	0.07549588	0.05541888	0.05109151	0.0551716
1	1_10714221_C_T	10714221	0	126	T	C	0.012	0.5642557	0.2908427	0.05467857	0.05038727	0.05445526
1	1_10714294_G_C	10714294	0	126	C	G	0.048	-0.3303918	0.1502548	0.02977258	0.02690072	0.03030553
1	1_10714402_C_T	10714402	0	126	T	C	0.048	-0.3303918	0.1502548	0.02977258	0.02690072	0.03030553
1	1_10753989_G_A	10753989	0	126	A	G	0.016	0.5360797	0.2516949	0.03519033	0.03196985	0.03557316
1	1_11017141_G_A	11017141	0	126	A	G	0.012	0.5642455	0.2908428	0.05468291	0.0503914	0.05445946
1	1_11105542_C_T	11105542	0	126	T	C	0.02	0.5687746	0.2247636	0.01266122	0.01112094	0.01350019
1	1_11116035_G_C	11116035	0	126	C	G	0.115	0.2354584	0.1048483	0.02652299	0.02387398	0.0271384
1	1_11718734_C_G	11718734	0	126	G	C	0.016	-0.5002237	0.2523028	0.0496556	0.04561707	0.04959397
1	1_11731927_AG_A	11731927	0	126	A	AG	0.262	-0.2016013	0.0746606	0.00791378	0.006842354	0.008724729
1	1_11735262_C_T	11735262	0	126	T	C	0.183	-0.1636835	0.08280265	0.0503209	0.04624807	0.05023798
1	1_11735841_C_A	11735841	0	126	A	C	0.183	-0.1636835	0.08280265	0.0503209	0.04624807	0.05023798
1	1_11737051_G_C	11737051	0	126	C	G	0.508	-0.1994821	0.06677985	0.003404589	0.002860704	0.004041507
1	1_11740358_A_G	11740358	0	126	G	A	0.397	-0.1573423	0.07101913	0.02858198	0.02579047	0.02914592
1	1_11771988_A_G	11771988	0	126	G	A	0.159	-0.2234541	0.07794879	0.004887633	0.004157635	0.00560866
1	1_11772340_G_A	11772340	0	126	A	G	0.159	-0.2234541	0.07794879	0.004887633	0.004157635	0.00560866
1	1_11772526_A_G	11772526	0	126	G	A	0.448	0.1435983	0.06176851	0.02173631	0.01943764	0.02245823
1	1_11832368_G_C	11832368	0	126	C	G	0.016	-0.4994	0.2523325	0.05005303	0.04599398	0.04997869
1	1_11844520_C_T	11844520	0	126	T	C	0.016	0.529513	0.2543922	0.03948098	0.03600221	0.03973695
1	1_12144643_G_A	12144643	0	126	A	G	0.036	-0.3942006	0.1707139	0.02261834	0.02025294	0.02332226
1	1_12378057_G_A	12378057	0	126	A	G	0.016	-0.4989633	0.2523493	0.05026577	0.04619577	0.05018462
1	1_12429611_C_T	12429611	0	126	T	C	0.016	-0.4989633	0.2523493	0.05026577	0.04619577	0.05018462
1	1_12628471_A_C	12628471	0	126	C	A	0.266	0.1829992	0.06843737	0.008523084	0.007387583	0.009343597
1	1_12639018_C_T	12639018	0	126	T	C	0.516	-0.1467514	0.06565401	0.02722211	0.02452421	0.02782037
1	1_12639226_C_T	12639226	0	126	T	C	0.25	0.1451476	0.07056217	0.04181606	0.03820262	0.04200085
1	1_12640650_C_T	12640650	0	126	T	C	0.25	0.1451476	0.07056217	0.04181606	0.03820262	0.04200085
1	1_12776218_A_C	12776218	0	126	C	A	0.837	-0.182766	0.08573191	0.03502596	0.03181568	0.03541353
1	1_12855740_C_A	12855740	0	126	A	C	0.04	0.3580317	0.1628602	0.0298074	0.02693321	0.03033943
1	1_12855898_C_T	12855898	0	126	T	C	0.052	0.3465706	0.1448251	0.01823483	0.01621202	0.01901881
1	1_12855962_C_T	12855962	0	126	T	C	0.048	0.3271632	0.1510849	0.03230115	0.02926324	0.03276571
1	1_12856079_C_T	12856079	0	126	T	C	0.095	-0.2189191	0.1127601	0.05450836	0.0502254	0.05429056
1	1_12856106_A_G	12856106	0	126	G	A	0.048	0.3048154	0.1506116	0.04517	0.04136982	0.04525055
1	1_12856197_T_G	12856197	0	126	G	T	0.044	0.3948446	0.1555623	0.01240226	0.01088596	0.01324195
1	1_12888706_C_A	12888706	0	126	A	C	0.087	-0.2343075	0.1168473	0.04714994	0.04324301	0.04716806
1	1_12907449_C_G	12907449	0	126	G	C	0.056	0.3133616	0.1297679	0.01722884	0.01528883	0.01802737
1	1_12907496_T_C	12907496	0	126	C	T	0.056	0.3133616	0.1297679	0.01722884	0.01528883	0.01802737
1	1_12907507_C_T	12907507	0	126	T	C	0.052	0.3465706	0.1448251	0.01823483	0.01621202	0.01901881
1	1_12907508_T_C	12907508	0	126	C	T	0.052	0.3465706	0.1448251	0.01823483	0.01621202	0.01901881
1	1_12907533_T_C	12907533	0	126	C	T	0.052	0.3465706	0.1448251	0.01823483	0.01621202	0.01901881
1	1_12907633_G_A	12907633	0	126	A	G	0.056	0.3133616	0.1297679	0.01722884	0.01528883	0.01802737
1	1_12907762_T_C	12907762	0	126	C	T	0.052	0.3465706	0.1448251	0.01823483	0.01621202	0.01901881
1	1_12907777_T_C	12907777	0	126	C	T	0.06	0.2641148	0.1270709	0.03976103	0.0362659	0.04000853
1	1_12907843_T_G	12907843	0	126	G	T	0.052	0.3465706	0.1448251	0.01823483	0.01621202	0.01901881
1	1_12907848_G_C	12907848	0	126	C	G	0.052	0.3465706	0.1448251	0.01823483	0.01621202	0.01901881
1	1_12908080_C_T	12908080	0	126	T	C	0.052	0.3465706	0.1448251	0.01823483	0.01621202	0.01901881
1	1_12908130_C_T	12908130	0	126	T	C	0.036	0.3339607	0.1716584	0.05401544	0.04975671	0.05381359
1	1_12918891_A_C	12918891	0	126	C	A	0.056	0.3133616	0.1297679	0.01722884	0.01528883	0.01802737
1	1_12919111_G_A	12919111	0	126	A	G	0.052	0.3465706	0.1448251	0.01823483	0.01621202	0.01901881
1	1_12919872_T_G	12919872	0	126	G	T	0.056	0.3133616	0.1297679	0.01722884	0.01528883	0.01802737
1	1_12919891_G_T	12919891	0	126	T	G	0.056	0.3133616	0.1297679	0.01722884	0.01528883	0.01802737
1	1_12920132_A_G	12920132	0	126	G	A	0.052	0.3465706	0.1448251	0.01823483	0.01621202	0.01901881
1	1_12920138_T_TCA	12920138	0	126	TCA	T	0.052	0.3465706	0.1448251	0.01823483	0.01621202	0.01901881
1	1_12920141_TGC_T	12920141	0	126	T	TGC	0.052	0.3465706	0.1448251	0.01823483	0.01621202	0.01901881
1	1_12920191_T_C	12920191	0	126	C	T	0.056	0.3133616	0.1297679	0.01722884	0.01528883	0.01802737
1	1_12920200_G_A	12920200	0	126	A	G	0.056	0.3133616	0.1297679	0.01722884	0.01528883	0.01802737
1	1_12921499_C_G	12921499	0	126	G	C	0.071	-0.2820115	0.1276752	0.02905494	0.02623134	0.02960667
1	1_12921594_C_G	12921594	0	126	G	C	0.016	-0.5275145	0.2544292	0.04024676	0.03672339	0.04047953
1	1_12921686_T_G	12921686	0	126	G	T	0.048	0.4101371	0.1486358	0.006684767	0.005746936	0.007468886
1	1_12939334_G_A	12939334	0	126	A	G	0.052	0.3465706	0.1448251	0.01823483	0.01621202	0.01901881
1	1_12939495_A_T	12939495	0	126	T	A	0.052	0.3465706	0.1448251	0.01823483	0.01621202	0.01901881
1	1_12939504_A_C	12939504	0	126	C	A	0.016	0.5535431	0.2511067	0.02937107	0.02652615	0.02991457
1	1_12939535_C_T	12939535	0	126	T	C	0.048	0.3179703	0.1504852	0.03664156	0.03333207	0.03698213
1	1_13001414_G_A	13001414	0	126	A	G	0.044	-0.3082441	0.1571655	0.05212545	0.04796085	0.05198457
1	1_13036330_G_A	13036330	0	126	A	G	0.647	-0.1909191	0.0844831	0.02560444	0.02302051	0.02624183
1	1_13038327_G_T	13038327	0	126	T	G	0.44	-0.130384	0.06760429	0.05609931	0.05173903	0.05582996
1	1_13183492_T_C	13183492	0	126	C	T	0.036	0.3345465	0.1716633	0.0536084	0.04936978	0.0534197
1	1_13183578_G_C	13183578	0	126	C	G	0.044	0.394905	0.1555625	0.01238929	0.0108742	0.01322901
1	1_13366053_G_A	13366053	0	126	A	G	0.571	0.1325741	0.06680995	0.04946163	0.04543316	0.0494062
1	1_13474934_G_A	13474934	0	126	A	G	0.052	0.3465706	0.1448251	0.01823483	0.01621202	0.01901881
1	1_13474951_C_G	13474951	0	126	G	C	0.052	0.3465706	0.1448251	0.01823483	0.01621202	0.01901881
1	1_13474974_G_A	13474974	0	126	A	G	0.052	0.3465706	0.1448251	0.01823483	0.01621202	0.01901881
1	1_13475186_A_G	13475186	0	126	G	A	0.052	0.3465706	0.1448251	0.01823483	0.01621202	0.01901881
1	1_14068686_C_T	14068686	0	126	T	C	0.012	0.5645531	0.2908408	0.0545515	0.05026642	0.0543323
1	1_14099529_TA_T	14099529	0	126	T	TA	0.02	0.5684478	0.2247661	0.01271206	0.01116709	0.01355087
1	1_15251078_CGCGGG_C	15251078	0	126	C	CGCGGG	0.048	-0.2505159	0.1288266	0.05412476	0.04986064	0.05391936
1	1_15654737_CT_CTT	15654737	0	126	CTT	CT	0.234	0.1847888	0.08354224	0.02883426	0.02602561	0.02939171
1	1_15808702_C_T	15808702	0	126	T	C	0.286	0.1369631	0.06845066	0.04762265	0.0436906	0.04762579
1	1_15808767_G_A	15808767	0	126	A	G	0.286	0.1369631	0.06845066	0.04762265	0.0436906	0.04762579
1	1_15808872_G_A	15808872	0	126	A	G	0.286	0.1369631	0.06845066	0.04762265	0.0436906	0.04762579
1	1_15809876_G_A	15809876	0	126	A	G	0.286	0.1369631	0.06845066	0.04762265	0.0436906	0.04762579
1	1_16095031_G_A	16095031	0	126	A	G	0.04	0.3512753	0.163315	0.03345541	0.03034368	0.03388774
1	1_16262465_A_C	16262465	0	126	C	A	0.123	-0.2936423	0.1014509	0.004501316	0.003818331	0.005203866
1	1_16262475_CTG_C	16262475	0	126	C	CTG	0.024	-0.4884902	0.2062108	0.01941172	0.01729413	0.02017669
1	1_16388534_C_T	16388534	0	126	T	C	0.325	-0.1394628	0.07134389	0.05289415	0.04869103	0.0527285
1	1_16388737_G_A	16388737	0	126	A	G	0.31	-0.1798604	0.07465572	0.01748234	0.01552131	0.01827737
1	1_16389026_T_C	16389026	0	126	C	T	0.325	-0.1443156	0.07281487	0.0497327	0.04569018	0.0496686
1	1_16464936_C_T	16464936	0	126	T	C	0.016	0.5543298	0.2511035	0.02914394	0.02631433	0.02969336
1	1_16533983_G_A	16533983	0	126	A	G	0.02	-0.4787476	0.2264928	0.03657379	0.03326843	0.03691636
1	1_16727204_A_C	16727204	0	126	C	A	0.063	-0.3175061	0.1351446	0.02041126	0.01821484	0.02115854
1	1_17279993_A_G	17279993	0	126	G	A	0.056	-0.2875775	0.1404553	0.04275935	0.03909261	0.04291504
1	1_17280643_T_C	17280643	0	126	C	T	0.056	-0.2875775	0.1404553	0.04275935	0.03909261	0.04291504
1	1_17280650_C_G	17280650	0	126	G	C	0.056	-0.2875775	0.1404553	0.04275935	0.03909261	0.04291504
1	1_17281235_G_A	17281235	0	126	A	G	0.056	-0.2875775	0.1404553	0.04275935	0.03909261	0.04291504
1	1_17287301_A_G	17287301	0	126	G	A	0.056	-0.2875775	0.1404553	0.04275935	0.03909261	0.04291504
1	1_17292223_G_A	17292223	0	126	A	G	0.056	-0.2875775	0.1404553	0.04275935	0.03909261	0.04291504
1	1_17292404_A_G	17292404	0	126	G	A	0.056	-0.2875775	0.1404553	0.04275935	0.03909261	0.04291504
1	1_17294685_A_G	17294685	0	126	G	A	0.056	-0.2875775	0.1404553	0.04275935	0.03909261	0.04291504
1	1_17295764_A_G	17295764	0	126	G	A	0.056	-0.2875775	0.1404553	0.04275935	0.03909261	0.04291504
1	1_17312592_G_A	17312592	0	126	A	G	0.06	0.320763	0.1370597	0.02089098	0.01865726	0.02162932
1	1_17567090_TCTTCCTAGTC_T	17567090	0	126	T	TCTTCCTAGTC	0.071	0.2558421	0.1186873	0.03307863	0.02999086	0.03352154
1	1_17597721_A_G	17597721	0	126	G	A	0.29	0.1530659	0.06561165	0.0212905	0.01902596	0.02202118
1	1_17609448_G_T	17609448	0	126	T	G	0.444	-0.1602138	0.05973135	0.008326756	0.007211755	0.009144429
1	1_17666139_G_A	17666139	0	126	A	G	0.139	0.2173668	0.09209993	0.01985551	0.01770274	0.0206128
1	1_17666326_T_G	17666326	0	126	G	T	0.139	0.2173668	0.09209993	0.01985551	0.01770274	0.0206128
1	1_17668609_C_T	17668609	0	126	T	C	0.075	0.2725689	0.118324	0.02293853	0.02054916	0.02363571
1	1_17674537_C_A	17674537	0	126	A	C	0.381	-0.1331637	0.06833443	0.05362618	0.04938668	0.0534369
1	1_17699539_C_T	17699539	0	126	T	C	0.056	0.3480516	0.1398945	0.01419744	0.01251798	0.01502825
1	1_17708627_G_A	17708627	0	126	A	G	0.056	0.3517456	0.1393555	0.01288413	0.01132333	0.01372233
1	1_17714864_T_C	17714864	0	126	C	T	0.234	-0.1440006	0.07213718	0.04813838	0.04417908	0.04812513
1	1_17718756_G_C	17718756	0	126	C	G	0.056	0.3517456	0.1393555	0.01288413	0.01132333	0.01372233
1	1_17720545_C_T	17720545	0	126	T	C	0.139	-0.226127	0.0849211	0.008794932	0.007631265	0.009619015
1	1_17722230_A_G	17722230	0	126	G	A	0.032	-0.3634126	0.181299	0.04723159	0.04332031	0.04724712
1	1_17725157_C_CA	17725157	0	126	CA	C	0.024	0.3310697	0.1588669	0.03925239	0.03578702	0.03951526
1	1_17929972_G_T	17929972	0	126	T	G	0.123	0.199457	0.09947764	0.04717189	0.04326378	0.04718931
1	1_17929990_A_C	17929990	0	126	C	A	0.127	0.2186331	0.09824666	0.02789537	0.02515088	0.02847679
1	1_17942754_A_T	17942754	0	126	T	A	0.024	-0.481812	0.2076749	0.02200083	0.01968203	0.02271743
1	1_17948305_G_GGGCCACAGCAGGTACT	17948305	0	126	GGGCCACAGCAGGTACT	G	0.139	0.2019779	0.09476438	0.0350648	0.0318521	0.03545125
1	1_18807938_C_A	18807938	0	126	A	C	0.167	0.1961834	0.07847816	0.01375263	0.01211294	0.01458646
1	1_18808711_G_C	18808711	0	126	C	G	0.155	0.1966154	0.08181618	0.01776115	0.01577712	0.0185522
1	1_19203997_C_G	19203997	0	126	G	C	0.714	-0.1802223	0.06902411	0.01015973	0.008858279	0.01099606
1	1_19228971_G_A	19228971	0	126	A	G	0.028	0.3956065	0.1967917	0.04660699	0.04272908	0.04664228
1	1_19229021_G_T	19229021	0	126	T	G	0.028	0.3956065	0.1967917	0.04660699	0.04272908	0.04664228
1	1_19229024_T_C	19229024	0	126	C	T	0.028	0.3956065	0.1967917	0.04660699	0.04272908	0.04664228
1	1_19238529_T_C	19238529	0	126	C	T	0.028	0.3956065	0.1967917	0.04660699	0.04272908	0.04664228
1	1_19593748_A_C	19593748	0	126	C	A	0.016	0.5379725	0.2516954	0.03456146	0.0313801	0.03496237
1	1_20073146_G_A	20073146	0	126	A	G	0.242	0.1410951	0.07113264	0.04955178	0.04551863	0.04949347
1	1_20107018_G_A	20107018	0	126	A	G	0.218	0.1746636	0.07380682	0.01953187	0.01740472	0.02029478
1	1_20517965_T_C	20517965	0	126	C	T	0.028	-0.3909689	0.1681947	0.02175184	0.01945198	0.02247345
1	1_20520732_T_C	20520732	0	126	C	T	0.468	-0.3303535	0.162235	0.04388861	0.04015887	0.04400923
1	1_20668864_TCTC_T	20668864	0	126	T	TCTC	0.056	-0.3632324	0.1427339	0.0121806	0.01068496	0.01302074
1	1_20964270_C_G	20964270	0	126	G	C	0.139	-0.185029	0.08914492	0.04003215	0.03652123	0.04027143
1	1_20977221_A_T	20977221	0	126	T	A	0.853	0.188483	0.09039956	0.03915476	0.03569512	0.03942057
1	1_20992819_G_C	20992819	0	126	C	G	0.81	0.2051845	0.08510804	0.01740611	0.01545139	0.0182022
1	1_21011355_T_C	21011355	0	126	C	T	0.044	0.3784854	0.1553449	0.01627762	0.01441752	0.01708828
1	1_21071967_C_T	21071967	0	126	T	C	0.06	-0.3325446	0.1370571	0.01671565	0.01481856	0.01752093
1	1_21809750_T_C	21809750	0	126	C	T	0.718	-0.1249258	0.06164713	0.04489745	0.04111216	0.04498655
1	1_21948936_G_C	21948936	0	126	C	G	0.853	0.2006626	0.08711461	0.02294719	0.02055717	0.02364419
1	1_22329523_A_G	22329523	0	126	G	A	0.02	0.5371488	0.261459	0.04206994	0.03844209	0.04224692
1	1_22927753_C_T	22927753	0	126	T	C	0.052	-0.2860608	0.1464079	0.0530061	0.04879739	0.05283684
1	1_23650032_G_C	23650032	0	126	C	G	0.012	0.5647294	0.2908398	0.05447633	0.05019494	0.05425957
1	1_24507165_A_C	24507165	2	124	C	A	0.117	0.1984861	0.0977391	0.04445143	0.04069062	0.04455448
1	1_24784197_T_C	24784197	0	126	C	T	0.484	0.1440021	0.06581118	0.03056694	0.02764224	0.03107876
1	1_24978915_G_T	24978915	0	126	T	G	0.476	0.4886492	0.2062044	0.01936942	0.0172552	0.02013511
1	1_25611035_G_C	25611035	0	126	C	G	0.746	-0.1173416	0.05797035	0.04513703	0.04133864	0.04521861
1	1_25634205_G_A	25634205	0	126	A	G	0.222	0.1239791	0.05969942	0.03992645	0.03642167	0.04016894
1	1_25648349_T_C	25648349	0	126	C	T	0.21	0.1197221	0.06085293	0.05140617	0.04727793	0.05128843
1	1_25717365_C_G	25717365	0	126	G	C	0.163	0.2008896	0.08508042	0.01980168	0.01765316	0.02055991
1	1_26131654_G_A	26131654	0	126	A	G	0.774	-0.1487411	0.07218389	0.04146822	0.03787459	0.0416637
1	1_26138032_C_G	26138032	0	126	G	C	0.016	-0.4997206	0.2523207	0.04989774	0.0458467	0.04982837
1	1_26138262_T_C	26138262	0	126	C	T	0.778	-0.1505909	0.07058625	0.03489186	0.03168991	0.03528329
1	1_26139137_C_T	26139137	0	126	T	C	0.766	-0.1417604	0.07138832	0.04930186	0.04528168	0.04925154
1	1_26140573_C_A	26140573	0	126	A	C	0.766	-0.1417604	0.07138832	0.04930186	0.04528168	0.04925154
1	1_26357667_G_A	26357667	0	126	A	G	0.194	-0.1630919	0.07812029	0.03890553	0.03546056	0.03917883
1	1_26361549_G_C	26361549	0	126	C	G	0.032	-0.3846172	0.1813506	0.0359588	0.03269098	0.03631935
1	1_26383875_A_G	26383875	0	126	G	A	0.226	-0.1531874	0.07436426	0.04152908	0.03793198	0.04172269
1	1_26385150_G_C	26385150	0	126	C	G	0.21	-0.1458076	0.07527915	0.05507041	0.05075998	0.05483441
1	1_26387625_A_C	26387625	0	126	C	A	0.19	-0.170165	0.07867815	0.0325074	0.02945621	0.03296624
1	1_27683615_G_A	27683615	0	126	A	G	0.044	-0.3167265	0.1581623	0.04744386	0.04352129	0.04745266
1	1_27686314_T_C	27686314	0	126	C	T	0.067	-0.3290453	0.140983	0.02123458	0.01897433	0.02196634
1	1_28206588_T_C	28206588	0	126	C	T	0.349	0.1682335	0.07087351	0.01917113	0.01707274	0.01994015
1	1_28209366_A_G	28209366	0	126	G	A	0.611	0.1269447	0.0655862	0.05523784	0.05091926	0.05499642
1	1_28792352_A_C	28792352	0	126	C	A	0.032	0.4294546	0.1799059	0.01851749	0.01647171	0.01929709
1	1_29016716_T_G	29016716	0	126	G	T	0.27	0.1713841	0.08368447	0.04270818	0.03904431	0.04286545
1	1_29522384_G_A	29522384	0	126	A	G	0.091	0.2832776	0.1136906	0.01405784	0.01239082	0.01488965
1	1_29581937_G_A	29581937	0	126	A	G	0.087	0.3941034	0.1146831	0.0008064483	0.0006449118	0.001131566
1	1_29602320_G_A	29602320	0	126	A	G	0.131	0.2618358	0.1019829	0.0114524	0.01002549	0.01229288
1	1_29641846_C_T	29641846	0	126	T	C	0.123	0.2070408	0.1040753	0.04890125	0.04490194	0.04886371
1	1_29641865_G_A	29641865	0	126	A	G	0.123	0.2070408	0.1040753	0.04890125	0.04490194	0.04886371
1	1_29642681_G_A	29642681	0	126	A	G	0.123	0.2070408	0.1040753	0.04890125	0.04490194	0.04886371
1	1_29644328_C_T	29644328	0	126	T	C	0.123	0.2070408	0.1040753	0.04890125	0.04490194	0.04886371
1	1_32127911_C_T	32127911	0	126	T	C	0.393	0.1757187	0.07007321	0.01346769	0.0118537	0.01430318
1	1_32127953_G_A	32127953	0	126	A	G	0.401	0.1585104	0.07146943	0.02841445	0.02563437	0.02898268
1	1_32128283_C_G	32128283	0	126	G	C	0.381	0.1436332	0.07100012	0.04525902	0.04145398	0.04533677
1	1_32161684_T_A	32161684	0	126	A	T	0.016	0.5335645	0.2519111	0.03619861	0.03291611	0.03655216
1	1_32674927_T_C	32674927	0	126	C	T	0.016	-0.4989276	0.2523508	0.05028323	0.04621233	0.05020152
1	1_32713199_A_G	32713199	0	126	G	A	0.04	0.2936133	0.1481164	0.04969149	0.04565111	0.04962872
1	1_32842319_T_C	32842319	0	126	C	T	0.044	-0.442728	0.1555691	0.005197121	0.004430112	0.00593152
1	1_33359278_T_C	33359278	0	126	C	T	0.087	-0.2783065	0.1178769	0.01981091	0.01766167	0.02056898
1	1_33359282_T_C	33359282	0	126	C	T	0.079	-0.3684328	0.1209968	0.00285148	0.002381506	0.00344576
1	1_33359286_T_C	33359286	0	126	C	T	0.044	-0.3099694	0.1570952	0.05074155	0.04664715	0.05064514
1	1_33360343_G_A	33360343	0	126	A	G	0.06	0.291896	0.1362544	0.03415735	0.03100131	0.03456979
1	1_33478983_G_A	33478983	0	126	A	G	0.381	-0.263487	0.1029759	0.01172843	0.01027531	0.01256899
1	1_33760743_T_C	33760743	0	126	C	T	0.798	0.2337127	0.0771155	0.002979935	0.002492536	0.003584815
1	1_33790496_G_A	33790496	0	126	A	G	0.222	-0.1498145	0.07575683	0.05023159	0.04616335	0.05015153
1	1_33799900_G_A	33799900	0	126	A	G	0.222	-0.1498145	0.07575683	0.05023159	0.04616335	0.05015153
1	1_33820134_C_T	33820134	0	126	T	C	0.222	-0.1498145	0.07575683	0.05023159	0.04616335	0.05015153
1	1_33987018_C_G	33987018	0	126	G	C	0.048	0.3268316	0.1510833	0.03247158	0.02942269	0.03293142
1	1_34008297_A_G	34008297	0	126	G	A	0.202	-0.1509018	0.07834508	0.05641614	0.05204062	0.05613651
1	1_34098959_C_G	34098959	0	126	G	C	0.119	0.2394712	0.09884397	0.01687439	0.01496397	0.01767763
1	1_34663147_C_T	34663147	0	126	T	C	0.02	0.5551783	0.2609319	0.03537653	0.03214454	0.03575398
1	1_34663411_C_G	34663411	0	126	G	C	0.246	-0.1647002	0.066195	0.0141918	0.01251284	0.01502265
1	1_34667863_C_A	34667863	0	126	A	C	0.25	-0.1555241	0.06634967	0.02069445	0.01847598	0.0214365
1	1_35470877_A_T	35470877	0	126	T	A	0.028	0.4643943	0.1964863	0.01968359	0.01754442	0.02044388
1	1_35561510_G_A	35561510	0	126	A	G	0.861	-0.2101067	0.08830846	0.01889922	0.01682264	0.01967272
1	1_35563206_C_G	35563206	0	126	G	C	0.877	-0.2479034	0.0923086	0.00824834	0.007141566	0.009064816
1	1_35654551_T_C	35654551	0	126	C	T	0.036	0.5720077	0.1968367	0.004348633	0.003684494	0.005043285
1	1_35654765_G_A	35654765	0	126	A	G	0.036	0.5720077	0.1968367	0.004348633	0.003684494	0.005043285
1	1_35654777_G_A	35654777	0	126	A	G	0.036	0.5720077	0.1968367	0.004348633	0.003684494	0.005043285
1	1_35656064_T_A	35656064	0	126	A	T	0.036	0.5720077	0.1968367	0.004348633	0.003684494	0.005043285
1	1_35656086_TAATC_T	35656086	0	126	T	TAATC	0.016	0.5378276	0.2516951	0.03460904	0.03142471	0.03500859
1	1_35656664_G_A	35656664	0	126	A	G	0.036	0.5720077	0.1968367	0.004348633	0.003684494	0.005043285
1	1_35657874_G_C	35657874	0	126	C	G	0.036	0.5720077	0.1968367	0.004348633	0.003684494	0.005043285
1	1_36203714_AATATATAT_TATATATAT	36203714	0	126	TATATATAT	AATATATAT	0.032	0.3174952	0.1341562	0.01952618	0.01739949	0.02028919
1	1_36643765_G_C	36643765	0	126	C	G	0.016	-0.4997245	0.2523205	0.04989589	0.04584494	0.04982657
1	1_36937878_C_T	36937878	0	126	T	C	0.024	-0.4867327	0.2143782	0.02493513	0.02239923	0.02558812
1	1_38149076_G_A	38149076	0	126	A	G	0.083	0.231403	0.107758	0.0337369	0.03060735	0.03416128
1	1_38185337_T_C	38185337	0	126	C	T	0.115	0.2174957	0.09793614	0.02821107	0.0254449	0.02878449
1	1_38186189_C_T	38186189	0	126	T	C	0.115	0.2174957	0.09793614	0.02821107	0.0254449	0.02878449
1	1_38186294_C_T	38186294	0	126	T	C	0.115	0.2174957	0.09793614	0.02821107	0.0254449	0.02878449
1	1_38220109_G_T	38220109	0	126	T	G	0.238	-0.1669248	0.07021326	0.01898942	0.01690559	0.01976144
1	1_38227086_A_T	38227086	0	126	T	A	0.262	-0.1761489	0.07009297	0.01327241	0.01167613	0.01410891
1	1_38353941_G_T	38353941	0	126	T	G	0.032	0.3574001	0.1611413	0.02841077	0.02563094	0.02897909
1	1_38485104_GTTTTTTTTTTGTTT_G	38485104	0	126	G	GTTTTTTTTTTGTTT	0.02	-0.4905656	0.2255317	0.03154743	0.02855838	0.03203272
1	1_39340862_A_G	39340862	0	126	G	A	0.202	0.1676738	0.08077758	0.04001816	0.03650806	0.04025788
1	1_39361569_G_A	39361569	0	126	A	G	0.202	0.1676738	0.08077758	0.04001816	0.03650806	0.04025788
1	1_39457016_C_T	39457016	0	126	T	C	0.377	0.1529306	0.06018704	0.01231023	0.0108025	0.01315012
1	1_39457293_T_C	39457293	0	126	C	T	0.389	0.158901	0.06017904	0.009361425	0.008139857	0.01019169
1	1_39466626_A_G	39466626	0	126	G	A	0.393	0.1399749	0.06050212	0.02236594	0.02001953	0.02307509
1	1_39466786_C_G	39466786	0	126	G	C	0.393	0.1399749	0.06050212	0.02236594	0.02001953	0.02307509
1	1_39988219_C_T	39988219	0	126	T	C	0.048	0.2973212	0.1525144	0.05353478	0.0492998	0.05334846
1	1_40226045_C_T	40226045	0	126	T	C	0.012	0.6048827	0.2946294	0.04220776	0.03857211	0.04238049
1	1_40432468_C_T	40432468	0	126	T	C	0.012	0.5654448	0.2908364	0.05417298	0.04990649	0.05396603
1	1_40556942_A_T	40556942	0	126	T	A	0.048	0.3270788	0.1510845	0.03234443	0.02930373	0.03280779
1	1_40705427_C_G	40705427	0	126	G	C	0.036	0.3448945	0.172074	0.0472483	0.04333613	0.0472633
1	1_40960619_G_A	40960619	0	126	A	G	0.036	0.3338984	0.171658	0.054059	0.04979812	0.05385573
1	1_40980668_T_C	40980668	0	126	C	T	0.095	-0.221311	0.1025791	0.03292943	0.02985118	0.03337651
1	1_41012847_A_G	41012847	0	126	G	A	0.036	0.3338984	0.171658	0.054059	0.04979812	0.05385573
1	1_41494222_G_T	41494222	0	126	T	G	0.484	0.1288178	0.06479065	0.04902663	0.04502077	0.04898509
1	1_42660782_C_T	42660782	0	126	T	C	0.02	-0.508936	0.2260708	0.02616122	0.02353772	0.02678536
1	1_43213499_C_T	43213499	0	126	T	C	0.627	-0.1615306	0.06727194	0.01785298	0.0158614	0.01864269
1	1_43239395_G_A	43239395	0	126	A	G	0.647	-0.1660928	0.06597859	0.0131196	0.01153724	0.01395681
1	1_43787437_A_G	43787437	0	126	G	A	0.242	-0.1468444	0.07540189	0.05377342	0.04952663	0.05357938
1	1_43815035_C_T	43815035	0	126	T	C	0.016	0.5290149	0.2543898	0.03966175	0.03617241	0.03991226
1	1_43830989_G_A	43830989	0	126	A	G	0.016	0.5290149	0.2543898	0.03966175	0.03617241	0.03991226
1	1_44451114_GA_G	44451114	0	126	G	GA	0.254	0.1847965	0.0862297	0.03409293	0.03094093	0.0345072
1	1_45189855_C_A	45189855	0	126	A	C	0.016	0.5542601	0.2511037	0.02916397	0.02633301	0.02971287
1	1_45362992_T_C	45362992	0	126	C	T	0.552	-0.1434789	0.0652868	0.02986063	0.02698288	0.03039125
1	1_46269717_C_G	46269717	0	126	G	C	0.032	-0.3865021	0.1812754	0.03500118	0.03179244	0.03538947
1	1_46658910_G_A	46658910	0	126	A	G	0.016	0.554639	0.2511026	0.02905537	0.02623174	0.02960709
1	1_47278104_G_T	47278104	0	126	T	G	0.02	-0.5348557	0.2281427	0.02067414	0.01845724	0.02141656
1	1_47400857_T_C	47400857	0	126	C	T	0.012	0.5637603	0.2908463	0.05489118	0.05058949	0.05466098
1	1_51767908_C_G	51767908	0	126	G	C	0.016	0.537066	0.2516941	0.03486064	0.03166063	0.03525297
1	1_52251455_C_T	52251455	0	126	T	C	0.012	0.5652661	0.2908372	0.05424852	0.04997831	0.05403912
1	1_52402956_G_A	52402956	0	126	A	G	0.964	0.3686682	0.1913727	0.05637538	0.05200182	0.05609707
1	1_52499070_CGCCCGCCACCTGAGGTCCCGCGATCGG_C	52499070	0	126	C	CGCCCGCCACCTGAGGTCCCGCGATCGG	0.036	-0.3266993	0.154418	0.03640512	0.03311002	0.03675263
1	1_52703491_G_C	52703491	0	126	C	G	0.036	-0.3174872	0.1539775	0.04134027	0.03775395	0.04153967
1	1_52810393_C_T	52810393	0	126	T	C	0.036	-0.3174872	0.1539775	0.04134027	0.03775395	0.04153967
1	1_52828384_A_G	52828384	0	126	G	A	0.036	-0.3174872	0.1539775	0.04134027	0.03775395	0.04153967
1	1_52855047_C_T	52855047	0	126	T	C	0.036	-0.3174872	0.1539775	0.04134027	0.03775395	0.04153967
1	1_52991983_A_G	52991983	0	126	G	A	0.036	-0.3174872	0.1539775	0.04134027	0.03775395	0.04153967
1	1_53323492_C_A	53323492	0	126	A	C	0.849	-0.1845399	0.08714529	0.03623787	0.03295297	0.03659027
1	1_53493625_A_G	53493625	0	126	G	A	0.056	-0.2950618	0.1465772	0.04631454	0.04245235	0.04635907
1	1_53535478_G_A	53535478	0	126	A	G	0.452	0.1179766	0.05935843	0.04910366	0.04509379	0.04905966
1	1_53716416_G_A	53716416	0	126	A	G	0.417	0.1307001	0.06603266	0.05003128	0.04597335	0.04995763
1	1_53723190_G_T	53723190	0	126	T	G	0.409	0.1310538	0.06645314	0.05085793	0.04675759	0.05075779
1	1_53930551_G_A	53930551	0	126	A	G	0.028	0.4214662	0.1927786	0.03070449	0.02777071	0.03121261
1	1_54060342_G_A	54060342	0	126	A	G	0.016	-0.4996528	0.2523231	0.04993053	0.04587779	0.04986011
1	1_54370306_G_A	54370306	0	126	A	G	0.298	0.1416203	0.07011908	0.04560419	0.04178038	0.0456711
1	1_54476147_G_A	54476147	0	126	A	G	0.052	0.2719346	0.134279	0.04503475	0.04124196	0.04511954
1	1_54644859_C_T	54644859	0	126	T	C	0.111	0.2900828	0.1000724	0.004443994	0.003768067	0.005143621
1	1_54653291_C_T	54653291	0	126	T	C	0.111	0.2900828	0.1000724	0.004443994	0.003768067	0.005143621
1	1_54661150_C_T	54661150	0	126	T	C	0.361	0.1900911	0.0701986	0.007743524	0.006690246	0.008551388
1	1_54670658_CCTT_C	54670658	0	126	C	CCTT	0.254	-0.2019732	0.07646027	0.009333442	0.008114709	0.01016344
1	1_54703918_G_A	54703918	0	126	A	G	0.016	0.5289985	0.2543897	0.03966773	0.03617804	0.03991806
1	1_55014013_C_T	55014013	0	126	T	C	0.056	-0.2798089	0.1426856	0.0521553	0.0479892	0.05201346
1	1_55064898_A_T	55064898	0	126	T	A	0.194	0.1540823	0.075319	0.04293275	0.03925629	0.04308307
1	1_55064910_A_G	55064910	0	126	G	A	0.044	-0.3139422	0.1565044	0.04707207	0.04316929	0.04709266
1	1_55076113_G_A	55076113	0	126	A	G	0.044	-0.3139422	0.1565044	0.04707207	0.04316929	0.04709266
1	1_55119515_T_G	55119515	0	126	G	T	0.294	0.1563332	0.07024106	0.0278735	0.02513052	0.02845547
1	1_55134487_G_A	55134487	0	126	A	G	0.258	0.1722541	0.07716438	0.02741987	0.02470823	0.02801322
1	1_55136529_T_C	55136529	0	126	C	T	0.27	0.211678	0.07687481	0.006797215	0.0058469	0.007584259
1	1_55266797_G_C	55266797	0	126	C	G	0.214	-0.1525053	0.07592416	0.04678193	0.04289465	0.04681169
1	1_55273422_A_T	55273422	0	126	T	A	0.214	-0.1545272	0.07598005	0.04414192	0.04039817	0.04425464
1	1_55279486_G_GA	55279486	0	126	GA	G	0.028	0.425174	0.1927644	0.02928093	0.02644208	0.02982678
1	1_55470811_G_A	55470811	0	126	A	G	0.067	-0.2630156	0.1318118	0.04822868	0.04426462	0.04821256
1	1_55472856_C_T	55472856	0	126	T	C	0.02	-0.4900276	0.2255542	0.03174757	0.02874549	0.03222738
1	1_55542962_T_G	55542962	0	126	G	T	0.052	-0.3631217	0.1442297	0.01310945	0.01152802	0.01394671
1	1_55609728_C_CT	55609728	0	126	CT	C	0.052	0.4905209	0.1417603	0.0007443835	0.0005936321	0.00105581
1	1_57185340_T_C	57185340	0	126	C	T	0.127	0.2074041	0.0986715	0.037613	0.03424489	0.0379249
1	1_57185818_A_G	57185818	0	126	G	A	0.663	0.1494432	0.06785003	0.02950552	0.02665156	0.03004549
1	1_57189193_AT_A	57189193	0	126	A	AT	0.024	0.5634432	0.2046285	0.006798173	0.005847751	0.007585241
1	1_57206341_G_A	57206341	0	126	A	G	0.02	-0.4911355	0.2255093	0.03133762	0.02836226	0.03182862
1	1_58996427_C_T	58996427	0	126	T	C	0.139	-0.2752899	0.1006024	0.007139287	0.00615133	0.007934617
1	1_59000056_C_T	59000056	0	126	T	C	0.02	-0.4952969	0.2253868	0.02987008	0.02699169	0.03040045
1	1_59002221_T_C	59002221	0	126	C	T	0.139	-0.2752899	0.1006024	0.007139287	0.00615133	0.007934617
1	1_59002282_A_C	59002282	0	126	C	A	0.02	-0.4952969	0.2253868	0.02987008	0.02699169	0.03040045
1	1_59004617_G_A	59004617	0	126	A	G	0.02	-0.4952969	0.2253868	0.02987008	0.02699169	0.03040045
1	1_59042997_C_T	59042997	0	126	T	C	0.103	-0.2188055	0.1133553	0.05589516	0.05154473	0.05563243
1	1_59134610_G_GA	59134610	0	126	GA	G	0.016	-0.4994952	0.252329	0.05000684	0.04595017	0.04993397
1	1_60299004_A_G	60299004	0	126	G	A	0.016	0.5537775	0.2511056	0.02930312	0.02646277	0.02984839
1	1_60505578_A_G	60505578	0	126	G	A	0.913	0.2996655	0.1152675	0.01048081	0.009147763	0.01131879
1	1_61553801_C_G	61553801	0	126	G	C	0.163	0.2161762	0.08555633	0.01279315	0.0112407	0.01363168
1	1_62257036_A_C	62257036	0	126	C	A	0.107	-0.2008517	0.1031304	0.05376601	0.04951959	0.05357221
1	1_62330134_G_A	62330134	0	126	A	G	0.012	0.565156	0.2908377	0.05429515	0.05002265	0.05408425
1	1_62380298_G_A	62380298	0	126	A	G	0.651	0.1564036	0.06677176	0.02078185	0.01855659	0.02152225
1	1_62393394_A_G	62393394	0	126	G	A	0.845	0.1545111	0.0776029	0.04871014	0.04472082	0.04867869
1	1_62456014_G_A	62456014	0	126	A	G	0.488	0.1430476	0.05906566	0.01691334	0.01499966	0.01771608
1	1_62673365_T_C	62673365	0	126	C	T	0.052	0.2819159	0.1339371	0.03735723	0.03400448	0.03767671
1	1_63066704_TTG_T	63066704	0	126	T	TTG	0.032	0.4234882	0.1806688	0.02069467	0.01847617	0.0214367
1	1_65138787_G_GA	65138787	0	126	GA	G	0.381	0.2071255	0.09942258	0.03931353	0.03584457	0.03957455
1	1_65830300_T_G	65830300	0	126	G	T	0.036	-0.4086703	0.1823613	0.02683529	0.02416437	0.02744308
1	1_66838076_C_T	66838076	0	126	T	C	0.028	-0.4970839	0.1906818	0.01027636	0.008963403	0.01111335
1	1_67236097_A_T	67236097	0	126	T	A	0.115	-0.2217557	0.09637086	0.023085	0.02068471	0.02377907
1	1_67242087_G_A	67242087	0	126	A	G	0.115	-0.2217557	0.09637086	0.023085	0.02068471	0.02377907
1	1_67515563_CAT_C	67515563	0	126	C	CAT	0.028	-0.3743848	0.1946494	0.0567623	0.0523702	0.05647144
1	1_68173264_C_T	68173264	0	126	T	C	0.567	-0.1495844	0.06696393	0.02731791	0.02461334	0.02791379
1	1_71536574_G_C	71536574	0	126	C	G	0.103	-0.2030339	0.105383	0.05635176	0.05197934	0.05607422
1	1_74716524_T_C	74716524	0	126	C	T	0.052	0.2820401	0.1339339	0.03727054	0.03392301	0.03759259
1	1_75175886_T_C	75175886	0	126	C	T	0.147	0.2127563	0.09388563	0.02520615	0.02265074	0.02585286
1	1_75214441_A_G	75214441	0	126	G	A	0.107	0.2255203	0.1089324	0.04053619	0.03699606	0.04076015
1	1_76199345_C_G	76199345	0	126	G	C	0.361	0.1212772	0.06261493	0.05507271	0.05076216	0.05483663
1	1_76255613_A_G	76255613	0	126	G	A	0.286	-0.1883155	0.06621742	0.005227238	0.004456656	0.005962875
1	1_76269460_G_A	76269460	0	126	A	G	0.29	-0.1963917	0.06605263	0.00355153	0.002988471	0.004198563
1	1_76344705_T_C	76344705	0	126	C	T	0.325	0.1626913	0.06816719	0.01853939	0.01649184	0.01931865
1	1_76345884_T_A	76345884	0	126	A	T	0.329	0.1863434	0.06645549	0.005873774	0.005027695	0.006633522
1	1_76349534_C_G	76349534	0	126	G	C	0.282	-0.1988281	0.06596197	0.003133843	0.00262578	0.003750846
1	1_76378357_ATATT_AT	76378357	0	126	AT	ATATT	0.25	-0.2160786	0.06784101	0.001837334	0.001511589	0.002328348
1	1_76378361_T_A	76378361	0	126	A	T	0.353	0.1302147	0.06631764	0.05186287	0.04771151	0.05173044
1	1_76378363_T_A	76378363	0	126	A	T	0.302	0.1277695	0.06532896	0.05277601	0.04857879	0.05261417
1	1_76387748_T_A	76387748	0	126	A	T	0.333	0.1493552	0.06489699	0.02306438	0.02066563	0.02375889
1	1_76397972_C_T	76397972	0	126	T	C	0.365	0.1633951	0.06293383	0.01058064	0.009237835	0.01141905
1	1_77094513_C_T	77094513	0	126	T	C	0.06	0.3361598	0.1260583	0.008698926	0.007545177	0.009521795
1	1_77747982_G_A	77747982	0	126	A	G	0.048	-0.5211658	0.1497476	0.000695449	0.0005533039	0.000995603
1	1_84765359_T_TA	84765359	0	126	TA	T	0.056	-0.2521792	0.1306814	0.05596257	0.05160888	0.05569766
1	1_84765360_T_TA	84765360	0	126	TA	T	0.02	-0.4904247	0.2255374	0.03159966	0.0286072	0.03208351
1	1_84880380_T_C	84880380	0	126	C	T	0.337	-0.1393343	0.0677691	0.04191413	0.03829512	0.0420959
1	1_85121097_A_G	85121097	0	126	G	A	0.028	0.4425116	0.1941171	0.02436783	0.02187307	0.02503374
1	1_85486765_G_A	85486765	0	126	A	G	0.016	-0.4994353	0.2523312	0.05003591	0.04597774	0.04996211
1	1_85624423_A_C	85624423	0	126	C	A	0.075	-0.2877348	0.1162795	0.014716	0.01299071	0.01554268
1	1_85624982_T_TA	85624982	0	126	TA	T	0.032	-0.3633062	0.1813034	0.04730055	0.0433856	0.0473139
1	1_85655916_G_A	85655916	0	126	A	G	0.075	-0.2877348	0.1162795	0.014716	0.01299071	0.01554268
1	1_86172231_A_G	86172231	0	126	G	A	0.02	0.5405919	0.2254651	0.01801577	0.01601085	0.01880306
1	1_86453237_T_G	86453237	0	126	G	T	0.278	-0.2169034	0.07095821	0.00274938	0.002293375	0.0033349
1	1_86524913_A_T	86524913	0	126	T	A	0.04	0.347862	0.1643533	0.03632979	0.03303928	0.03667951
1	1_86591141_A_G	86591141	0	126	G	A	0.071	-0.2631267	0.1185596	0.02831064	0.02553765	0.02888152
1	1_86621998_C_T	86621998	0	126	T	C	0.071	-0.2631267	0.1185596	0.02831064	0.02553765	0.02888152
1	1_86954880_G_A	86954880	0	126	A	G	0.016	-0.4995684	0.2523262	0.0499714	0.04591655	0.04989967
1	1_86961210_C_T	86961210	0	126	T	C	0.016	-0.4995684	0.2523262	0.0499714	0.04591655	0.04989967
1	1_86965419_T_C	86965419	0	126	C	T	0.226	-0.2390567	0.07431097	0.001659091	0.001360173	0.002127261
1	1_87099909_A_G	87099909	0	126	G	A	0.139	0.1887189	0.09165426	0.04161958	0.03801731	0.0418104
1	1_87633761_C_T	87633761	0	126	T	C	0.861	-0.2037194	0.0882505	0.02265901	0.02029055	0.02336208
1	1_89844035_T_C	89844035	0	126	C	T	0.044	-0.3199146	0.1564282	0.04299364	0.03931375	0.04314207
1	1_89849268_T_C	89849268	0	126	C	T	0.044	-0.3199146	0.1564282	0.04299364	0.03931375	0.04314207
1	1_91383589_T_G	91383589	0	126	G	T	0.163	-0.2013697	0.08787145	0.02364115	0.02119965	0.02432321
1	1_91781576_C_A	91781576	0	126	A	C	0.06	-0.3507343	0.1307635	0.008327608	0.007212518	0.009145294
1	1_91782011_G_A	91782011	0	126	A	G	0.056	-0.3470715	0.1309848	0.009123097	0.00792576	0.009950961
1	1_91844815_T_C	91844815	0	126	C	T	0.063	-0.3584042	0.1263237	0.005331241	0.004548363	0.006071071
1	1_91981484_G_A	91981484	0	126	A	G	0.032	-0.3554695	0.1843798	0.0561891	0.05182449	0.05591683
1	1_92445257_C_G	92445257	0	126	G	C	0.282	-0.150266	0.06863283	0.03046938	0.02755115	0.03098382
1	1_92446961_TTGTATGTA_TTGTATGTATGTA	92446961	0	126	TTGTATGTATGTA	TTGTATGTA	0.274	-0.1534603	0.07110551	0.03287072	0.02979623	0.03331945
1	1_92754667_C_T	92754667	0	126	T	C	0.012	0.5649337	0.2908387	0.05438945	0.05011232	0.0541755
1	1_93646418_C_T	93646418	0	126	T	C	0.266	0.1455323	0.07282448	0.04789704	0.04395047	0.04789147
1	1_93697961_GAT_G	93697961	0	126	G	GAT	0.016	0.5368062	0.2516941	0.03494706	0.03174168	0.0353369
1	1_94360107_C_A	94360107	0	126	A	C	0.266	-0.1485192	0.0725418	0.04276986	0.03910253	0.04292522
1	1_94367097_G_A	94367097	0	126	A	G	0.333	-0.1325283	0.06464511	0.04249841	0.03884635	0.04266217
1	1_94476203_CT_C	94476203	0	126	C	CT	0.234	-0.1603362	0.07506065	0.03467002	0.03148189	0.03506782
1	1_94476388_C_G	94476388	0	126	G	C	0.234	-0.1603362	0.07506065	0.03467002	0.03148189	0.03506782
1	1_94476991_CT_C	94476991	0	126	C	CT	0.234	-0.1603362	0.07506065	0.03467002	0.03148189	0.03506782
1	1_94487354_G_A	94487354	0	126	A	G	0.595	0.1488532	0.06190075	0.01768852	0.01571046	0.01848061
1	1_94528064_G_C	94528064	0	126	C	G	0.067	0.3534356	0.1281182	0.006697773	0.005758495	0.007482235
1	1_95005758_A_G	95005758	0	126	G	A	0.024	0.4049091	0.2089986	0.05501047	0.05070296	0.05477642
1	1_97847874_T_C	97847874	0	126	C	T	0.167	0.1584826	0.08063065	0.05162392	0.04748464	0.05149918
1	1_100318245_T_G	100318245	0	126	G	T	0.016	0.5550556	0.2511019	0.02893665	0.02612106	0.02949145
1	1_100326966_C_G	100326966	0	126	G	C	0.016	0.5550556	0.2511019	0.02893665	0.02612106	0.02949145
1	1_100327183_T_C	100327183	0	126	C	T	0.016	0.5550556	0.2511019	0.02893665	0.02612106	0.02949145
1	1_100340782_G_T	100340782	0	126	T	G	0.016	0.5550556	0.2511019	0.02893665	0.02612106	0.02949145
1	1_100345455_C_A	100345455	0	126	A	C	0.016	0.5550556	0.2511019	0.02893665	0.02612106	0.02949145
1	1_100361823_G_A	100361823	0	126	A	G	0.016	0.5550556	0.2511019	0.02893665	0.02612106	0.02949145
1	1_100366141_A_G	100366141	0	126	G	A	0.02	0.5699035	0.2247575	0.01248788	0.01096363	0.01332735
1	1_100366453_T_G	100366453	0	126	G	T	0.016	0.5550556	0.2511019	0.02893665	0.02612106	0.02949145
1	1_100377973_T_C	100377973	0	126	C	T	0.02	0.5508592	0.2243794	0.01549692	0.01370363	0.01631624
1	1_100480826_C_T	100480826	0	126	T	C	0.02	0.5508592	0.2243794	0.01549692	0.01370363	0.01631624
1	1_100483201_C_T	100483201	0	126	T	C	0.016	0.5370155	0.2516941	0.03487742	0.03167636	0.03526926
1	1_100503875_G_A	100503875	0	126	A	G	0.02	0.5508592	0.2243794	0.01549692	0.01370363	0.01631624
1	1_100535250_CT_C	100535250	0	126	C	CT	0.02	0.5508592	0.2243794	0.01549692	0.01370363	0.01631624
1	1_100575974_T_C	100575974	0	126	C	T	0.02	0.5508592	0.2243794	0.01549692	0.01370363	0.01631624
1	1_100598439_G_C	100598439	0	126	C	G	0.02	0.5508592	0.2243794	0.01549692	0.01370363	0.01631624
1	1_100681587_A_G	100681587	0	126	G	A	0.02	0.5508592	0.2243794	0.01549692	0.01370363	0.01631624
1	1_100700972_C_CT	100700972	0	126	CT	C	0.02	0.5508592	0.2243794	0.01549692	0.01370363	0.01631624
1	1_100750733_AGTTTT_A	100750733	0	126	A	AGTTTT	0.865	0.1853842	0.08631194	0.0337037	0.03057625	0.03412902
1	1_100949822_T_G	100949822	0	126	G	T	0.012	0.5627831	0.2908552	0.05531406	0.05099177	0.05507017
1	1_101437918_C_CT	101437918	0	126	CT	C	0.04	0.3580304	0.1628601	0.02980795	0.02693372	0.03033996
1	1_102271775_C_T	102271775	0	126	T	C	0.016	0.5806495	0.252577	0.02321172	0.02080201	0.02390308
1	1_102312412_G_A	102312412	0	126	A	G	0.012	0.5638117	0.2908459	0.05486905	0.05056844	0.05463958
1	1_103427381_A_G	103427381	0	126	G	A	0.206	-0.1612642	0.08313732	0.05472021	0.05042687	0.05449555
1	1_103444497_A_G	103444497	0	126	G	A	0.206	-0.1612642	0.08313732	0.05472021	0.05042687	0.05449555
1	1_104116565_A_T	104116565	0	126	T	A	0.21	0.1767266	0.07551305	0.02088941	0.01865581	0.02162778
1	1_104117921_G_A	104117921	0	126	A	G	0.02	-0.4793088	0.2264728	0.03634218	0.03305092	0.03669154
1	1_104297384_T_A	104297384	0	126	A	T	0.028	0.410594	0.1923497	0.03479229	0.03159653	0.03518658
1	1_107600869_G_A	107600869	0	126	A	G	0.044	0.3850503	0.1552097	0.01446983	0.01276623	0.01529856
1	1_108703834_C_T	108703834	0	126	T	C	0.095	0.2128813	0.107832	0.05061915	0.04653102	0.05052667
1	1_109103019_T_G	109103019	0	126	G	T	0.024	-0.4824371	0.2076521	0.02181879	0.01951383	0.02253906
1	1_109486269_C_A	109486269	0	126	A	C	0.063	-0.2547964	0.1166321	0.03082875	0.02788678	0.03133353
1	1_109492415_A_T	109492415	0	126	T	A	0.016	-0.499324	0.2523354	0.05008999	0.04602903	0.05001447
1	1_109525421_TA_T	109525421	0	126	T	TA	0.163	-0.1920351	0.09440637	0.04410647	0.04036468	0.0442203
1	1_109618488_A_G	109618488	0	126	G	A	0.016	0.5377412	0.2516949	0.03463745	0.03145135	0.03503619
1	1_109637229_C_G	109637229	0	126	G	C	0.171	0.2152932	0.08143247	0.009274234	0.00806151	0.01010365
1	1_109656981_T_C	109656981	0	126	C	T	0.194	0.1715156	0.07495866	0.02385081	0.02139388	0.02452826
1	1_109716533_T_G	109716533	0	126	G	T	0.016	-0.4853449	0.252231	0.05665746	0.05227037	0.05637
1	1_109838918_C_T	109838918	0	126	T	C	0.937	0.2712665	0.1395042	0.05413621	0.04987152	0.05393044
1	1_109839063_ATT_AT	109839063	0	126	AT	ATT	0.294	0.2014034	0.0866462	0.02175557	0.01945543	0.0224771
1	1_110211681_G_C	110211681	0	126	C	G	0.484	0.2032056	0.06368385	0.001803794	0.001483057	0.002290644
1	1_110211835_T_C	110211835	0	126	C	T	0.544	-0.1606679	0.05949944	0.007911768	0.006840556	0.008722681
1	1_110299691_G_A	110299691	0	126	A	G	0.048	0.2679203	0.1386227	0.05558695	0.05125142	0.05533421
1	1_110302505_G_A	110302505	0	126	A	G	0.056	-0.2930953	0.140457	0.03899535	0.03554509	0.03926595
1	1_110467831_T_A	110467831	0	126	A	T	0.02	-0.5361746	0.2280767	0.02033428	0.01814389	0.02108298
1	1_111144661_A_G	111144661	0	126	G	A	0.063	-0.2660687	0.1266816	0.03776254	0.03438547	0.03806999
1	1_111144859_AT_A	111144859	0	126	A	AT	0.063	-0.2660687	0.1266816	0.03776254	0.03438547	0.03806999
1	1_111494194_C_T	111494194	0	126	T	C	0.218	0.1641069	0.07544807	0.03155156	0.02856223	0.03203673
1	1_111773600_A_G	111773600	0	126	G	A	0.087	-0.2088978	0.1061203	0.05127817	0.04715642	0.05116454
1	1_111783942_C_T	111783942	0	126	T	C	0.087	-0.2088978	0.1061203	0.05127817	0.04715642	0.05116454
1	1_111784138_T_C	111784138	0	126	C	T	0.377	0.1454961	0.06863029	0.03603203	0.03275972	0.03639045
1	1_111991768_G_A	111991768	0	126	A	G	0.048	-0.278434	0.1384641	0.04654324	0.04266875	0.04658055
1	1_111992019_T_A	111992019	0	126	A	T	0.071	-0.2541339	0.1185753	0.03408008	0.03092889	0.03449472
1	1_112020229_A_C	112020229	0	126	C	A	0.016	-0.4990576	0.2523457	0.05021973	0.0461521	0.05014005
1	1_112305406_TAA_T	112305406	0	126	T	TAA	0.052	0.4175575	0.1426656	0.004085816	0.003454488	0.004766009
1	1_113063125_A_G	113063125	0	126	G	A	0.413	0.1307076	0.06004191	0.03141062	0.0284305	0.03189964
1	1_113068577_C_T	113068577	0	126	T	C	0.206	0.2457175	0.07403857	0.001192253	0.0009663933	0.001590619
1	1_113140583_T_C	113140583	0	126	C	T	0.206	0.2457175	0.07403857	0.001192253	0.0009663933	0.001590619
1	1_113162538_C_G	113162538	0	126	G	C	0.016	0.5548063	0.2511023	0.02900763	0.02618723	0.02956058
1	1_113202417_G_A	113202417	0	126	A	G	0.567	-0.1273151	0.06083434	0.03843776	0.03502046	0.03872508
1	1_113234456_G_A	113234456	0	126	A	G	0.563	-0.1212161	0.06131643	0.05030895	0.04623673	0.05022642
1	1_113236681_C_T	113236681	0	126	T	C	0.21	0.2331156	0.07422899	0.002116375	0.001749622	0.002639879
1	1_113237171_A_G	113237171	0	126	G	A	0.21	0.2331156	0.07422899	0.002116375	0.001749622	0.002639879
1	1_113239382_G_A	113239382	0	126	A	G	0.21	0.2331156	0.07422899	0.002116375	0.001749622	0.002639879
1	1_113240790_G_T	113240790	0	126	T	G	0.21	0.2331156	0.07422899	0.002116375	0.001749622	0.002639879
1	1_113241052_T_C	113241052	0	126	C	T	0.21	0.2331156	0.07422899	0.002116375	0.001749622	0.002639879
1	1_113242488_C_T	113242488	0	126	T	C	0.623	-0.1312522	0.06340514	0.04055732	0.03701598	0.04078064
1	1_113243048_C_T	113243048	0	126	T	C	0.21	0.2331156	0.07422899	0.002116375	0.001749622	0.002639879
1	1_114224782_AT_A	114224782	0	126	A	AT	0.032	-0.3835203	0.1814039	0.03653583	0.03323278	0.03687951
1	1_114963113_A_G	114963113	0	126	G	A	0.056	0.2610239	0.1229202	0.03572974	0.03247598	0.03609695
1	1_114967431_C_CTT	114967431	0	126	CTT	C	0.056	0.2610239	0.1229202	0.03572974	0.03247598	0.03609695
1	1_115005658_TAAG_T	115005658	0	126	T	TAAG	0.056	0.2610239	0.1229202	0.03572974	0.03247598	0.03609695
1	1_115168440_T_G	115168440	0	126	G	T	0.056	0.2610239	0.1229202	0.03572974	0.03247598	0.03609695
1	1_115222169_G_C	115222169	0	126	C	G	0.056	0.2610239	0.1229202	0.03572974	0.03247598	0.03609695
1	1_115222237_T_A	115222237	0	126	A	T	0.056	0.2610239	0.1229202	0.03572974	0.03247598	0.03609695
1	1_115280605_A_C	115280605	0	126	C	A	0.06	0.339354	0.1186782	0.004993174	0.004250491	0.005718897
1	1_115537367_A_C	115537367	0	126	C	A	0.056	0.2323107	0.1161989	0.04780355	0.04386193	0.04780095
1	1_115576023_A_G	115576023	0	126	G	A	0.96	0.3289824	0.1662785	0.05012522	0.04606245	0.05004856
1	1_115615476_C_G	115615476	0	126	G	C	0.056	0.2323107	0.1161989	0.04780355	0.04386193	0.04780095
1	1_115631924_C_T	115631924	0	126	T	C	0.948	0.3737292	0.1447582	0.01101259	0.009627859	0.01185239
1	1_116206407_C_T	116206407	0	126	T	C	0.012	0.6068371	0.2946051	0.04154151	0.0379437	0.04173473
1	1_116243877_G_A	116243877	0	126	A	G	0.353	-0.1391342	0.05955166	0.02110339	0.01885326	0.02183769
1	1_116268178_GAAA_G	116268178	0	126	G	GAAA	0.147	-0.1937653	0.09773336	0.0496602	0.04562144	0.04959843
1	1_116577747_A_T	116577747	0	126	T	A	0.036	-0.3693011	0.180577	0.04299409	0.03931418	0.04314251
1	1_116577919_T_A	116577919	0	126	A	T	0.032	-0.3633982	0.1812996	0.0472409	0.04332912	0.04725614
1	1_117529458_G_A	117529458	0	126	A	G	0.409	0.1495195	0.07422996	0.04618008	0.04232513	0.04622885
1	1_117559726_A_G	117559726	0	126	G	A	0.964	0.3022627	0.1555081	0.05423297	0.04996353	0.05402408
1	1_117560818_A_G	117560818	0	126	G	A	0.274	0.2015756	0.07775949	0.01069795	0.009343703	0.0115368
1	1_117560929_C_A	117560929	0	126	A	C	0.226	0.2026275	0.07907701	0.01161115	0.01016915	0.01245171
1	1_117633918_C_T	117633918	0	126	T	C	0.024	-0.489013	0.2061901	0.01927315	0.01716661	0.02004046
1	1_117638696_G_A	117638696	0	126	A	G	0.044	-0.3580949	0.141972	0.01294672	0.01138017	0.01378467
1	1_117654858_G_A	117654858	0	126	A	G	0.067	-0.3707666	0.1190992	0.002306915	0.001912782	0.002850629
1	1_117659352_C_T	117659352	0	126	T	C	0.075	-0.2484062	0.1235224	0.04652753	0.04265389	0.04656534
1	1_117660608_C_T	117660608	0	126	T	C	0.921	0.2512956	0.1232211	0.04357131	0.03985918	0.0437018
1	1_118165577_C_G	118165577	0	126	G	C	0.056	-0.3671788	0.1459808	0.01319481	0.01160559	0.01403168
1	1_118165691_C_G	118165691	0	126	G	C	0.056	-0.3671788	0.1459808	0.01319481	0.01160559	0.01403168
1	1_118166385_G_A	118166385	0	126	A	G	0.016	-0.4991806	0.2523409	0.05015974	0.04609519	0.05008198
1	1_118166853_C_A	118166853	0	126	A	C	0.048	-0.3431332	0.157932	0.03173869	0.02873719	0.03221874
1	1_118495327_C_G	118495327	0	126	G	C	0.012	0.564517	0.290841	0.05456687	0.05028104	0.05434718
1	1_118548044_G_T	118548044	0	126	T	G	0.02	0.389047	0.1898773	0.04261277	0.03895427	0.04277299
1	1_118657952_C_T	118657952	0	126	T	C	0.056	-0.3105425	0.1414646	0.03004207	0.02715221	0.03056789
1	1_120166453_G_C	120166453	0	126	C	G	0.111	0.209027	0.09377849	0.02764862	0.02492115	0.02823625
1	1_121129695_A_G	121129695	0	126	G	A	0.333	-0.2023645	0.09405691	0.03340661	0.03029798	0.03384031
1	1_143767312_G_T	143767312	0	126	T	G	0.48	-0.540231	0.2254645	0.01809065	0.01607961	0.01887683
1	1_143767466_G_A	143767466	0	126	A	G	0.123	0.2262556	0.1021957	0.02869107	0.02589214	0.02925221
1	1_143767628_C_T	143767628	0	126	T	C	0.425	-0.3092548	0.1222093	0.01266159	0.01112127	0.01350056
1	1_144816724_G_A	144816724	0	126	A	G	0.175	0.2213042	0.09223996	0.01794325	0.01594427	0.01873162
1	1_144823086_G_A	144823086	0	126	A	G	0.06	0.3207765	0.1260519	0.01218148	0.01068576	0.01302161
1	1_144823744_A_T	144823744	0	126	T	A	0.135	0.2790331	0.098311	0.005314363	0.004533476	0.006053521
1	1_144823936_C_G	144823936	0	126	G	C	0.016	-0.4990637	0.2523454	0.05021676	0.04614928	0.05013718
1	1_144823943_G_A	144823943	0	126	A	G	0.032	-0.3837096	0.1813942	0.03643519	0.03313826	0.03678182
1	1_144826340_G_A	144826340	0	126	A	G	0.016	-0.4999794	0.2523114	0.04977293	0.04572834	0.04970756
1	1_144852508_AAACAT_A	144852508	0	126	A	AAACAT	0.381	-0.252159	0.1028479	0.01563154	0.01382665	0.01644945
1	1_144854285_T_G	144854285	0	126	G	T	0.016	0.5367475	0.2516941	0.03496661	0.03176002	0.03535589
1	1_144854501_CCT_C	144854501	0	126	C	CCT	0.214	0.2177924	0.0889267	0.01574118	0.01392687	0.01655792
1	1_144863401_T_C	144863401	0	126	C	T	0.214	0.2458259	0.0883197	0.006237004	0.005349447	0.007008409
1	1_144863505_A_G	144863505	0	126	G	A	0.476	0.5004376	0.205907	0.01653726	0.01465519	0.01734477
1	1_144879090_T_C	144879090	0	126	C	T	0.302	0.2091897	0.09044349	0.02240121	0.02005214	0.02310964
1	1_144880832_T_C	144880832	0	126	C	T	0.302	0.2091897	0.09044349	0.02240121	0.02005214	0.02310964
1	1_144886332_A_G	144886332	0	126	G	A	0.016	0.5547257	0.2511024	0.02903061	0.02620865	0.02958297
1	1_144923887_T_A	144923887	0	126	A	T	0.187	-0.2190847	0.09147129	0.0181359	0.01612116	0.01892139
1	1_144931087_T_C	144931087	0	126	C	T	0.298	0.1909378	0.09044621	0.03680797	0.03348839	0.03714366
1	1_144931461_A_T	144931461	0	126	T	A	0.302	0.2091897	0.09044349	0.02240121	0.02005214	0.02310964
1	1_144952538_C_G	144952538	0	126	G	C	0.286	-0.1920421	0.08954314	0.03396061	0.03081694	0.03437864
1	1_145021150_T_C	145021150	0	126	C	T	0.087	0.2606204	0.1160392	0.02650554	0.02385776	0.02712137
1	1_145039594_T_C	145039594	0	126	C	T	0.147	-0.2057295	0.09702295	0.03599562	0.03272554	0.03635509
1	1_145075923_C_T	145075923	0	126	T	C	0.456	0.397707	0.1641877	0.01689431	0.01498223	0.0176973
1	1_145297599_C_T	145297599	0	126	T	C	0.02	-0.4907198	0.2255255	0.03149046	0.02850512	0.03197729
1	1_145302745_A_T	145302745	0	126	T	A	0.095	-0.2410025	0.113751	0.0361452	0.03286596	0.03650031
1	1_145323614_A_G	145323614	0	126	G	A	0.099	-0.2357525	0.1106745	0.03516799	0.0319489	0.03555146
1	1_145352708_T_C	145352708	0	126	C	T	0.012	0.5642364	0.2908428	0.0546868	0.0503951	0.05446323
1	1_145366147_A_G	145366147	0	126	G	A	0.131	0.1750431	0.09076694	0.0561175	0.05175634	0.05584756
1	1_145367863_A_T	145367863	0	126	T	A	0.516	-0.4991081	0.2523437	0.05019511	0.04612874	0.05011622
1	1_145456732_GAA_GA	145456732	0	126	GA	GAA	0.262	0.1971708	0.08927821	0.02907795	0.0262528	0.02962908
1	1_145559010_CGT_C	145559010	0	126	C	CGT	0.036	0.4284357	0.1792629	0.0183796	0.01634501	0.01916136
1	1_145561116_G_A	145561116	0	126	A	G	0.131	0.1635095	0.08486243	0.05633517	0.05196354	0.05605817
1	1_145562532_C_G	145562532	0	126	G	C	0.016	0.5362278	0.2516947	0.03514054	0.03192315	0.03552481
1	1_145611364_A_G	145611364	0	126	G	A	0.016	-0.50056	0.2522915	0.04949473	0.04546453	0.04943824
1	1_146055349_G_A	146055349	0	126	A	G	0.079	0.2608146	0.1210222	0.03311872	0.0300284	0.03356051
1	1_146398399_G_A	146398399	0	126	A	G	0.123	-0.1992561	0.1027972	0.05489145	0.05058975	0.05466125
1	1_146406332_G_C	146406332	0	126	C	G	0.115	-0.1888545	0.08997237	0.03787612	0.03449226	0.03818021
1	1_147595042_T_G	147595042	0	126	G	T	0.095	0.2384895	0.1122052	0.03556329	0.03231977	0.03593533
1	1_147955018_A_G	147955018	0	126	G	A	0.012	0.5647924	0.2908395	0.05444954	0.05016947	0.05423365
1	1_148016476_G_T	148016476	0	126	T	G	0.063	0.2877062	0.1360376	0.03647293	0.0331737	0.03681846
1	1_148579574_C_G	148579574	0	126	G	C	0.028	0.4110045	0.1923507	0.03461538	0.03143065	0.03501474
1	1_148644469_G_A	148644469	0	126	A	G	0.056	-0.2449854	0.1153665	0.03572821	0.03247455	0.03609547
1	1_150551295_T_C	150551295	0	126	C	T	0.036	-0.3852575	0.170766	0.02584807	0.02324679	0.0264797
1	1_150789953_T_A	150789953	0	126	A	T	0.048	0.3390069	0.1521491	0.02770481	0.02497346	0.02829103
1	1_150939492_G_A	150939492	0	126	A	G	0.012	0.6050633	0.2946268	0.04214555	0.03851342	0.0423202
1	1_150974971_T_A	150974971	0	126	A	T	0.063	0.297347	0.1371685	0.03211968	0.02909349	0.03258926
1	1_150990913_G_C	150990913	0	126	C	G	0.063	0.2919721	0.1356347	0.03331609	0.03021321	0.03375234
1	1_151104950_G_A	151104950	0	126	A	G	0.675	-0.1498291	0.06877266	0.03128278	0.02831101	0.03177527
1	1_151732700_A_G	151732700	0	126	G	A	0.488	-0.134809	0.06302273	0.03442394	0.03125118	0.03482879
1	1_151733335_T_G	151733335	0	126	G	T	0.488	-0.134809	0.06302273	0.03442394	0.03125118	0.03482879
1	1_151742798_T_C	151742798	0	126	C	T	0.357	-0.1340945	0.06408423	0.03846902	0.03504986	0.03875541
1	1_151747043_C_T	151747043	0	126	T	C	0.484	0.1688423	0.05883874	0.004845894	0.004120931	0.005565024
1	1_151747799_G_A	151747799	0	126	A	G	0.639	0.1434449	0.06415196	0.02716858	0.0244744	0.02776816
1	1_151747970_A_G	151747970	0	126	G	A	0.218	-0.154681	0.0739831	0.03862521	0.0351968	0.03890692
1	1_151748425_C_A	151748425	0	126	A	C	0.635	0.1480953	0.06320691	0.02074668	0.01852415	0.02148775
1	1_151754112_T_C	151754112	0	126	C	T	0.488	0.1649655	0.05938569	0.006336999	0.005438135	0.007111395
1	1_151780177_C_T	151780177	0	126	T	C	0.421	0.1445482	0.06508413	0.02820035	0.02543492	0.02877404
1	1_151789647_T_G	151789647	0	126	G	T	0.516	0.1251234	0.06367476	0.05168238	0.04754014	0.05155576
1	1_151803449_G_T	151803449	0	126	T	G	0.321	-0.1901555	0.06819119	0.006143753	0.005266784	0.006912285
1	1_151819691_AGGAGGCAGGAGGCAGGCAGGGGAGGCAGGAGGCAGGAGGCAGGCAGG_A	151819691	0	126	A	AGGAGGCAGGAGGCAGGCAGGGGAGGCAGGAGGCAGGAGGCAGGCAGG	0.671	0.1076829	0.04852016	0.02831189	0.02553883	0.02888275
1	1_152084984_C_G	152084984	0	126	G	C	0.048	-0.3436361	0.1579895	0.03155479	0.02856526	0.03203987
1	1_152185500_C_G	152185500	0	126	G	C	0.21	-0.1833269	0.07348353	0.01393979	0.01228332	0.01477241
1	1_152185750_G_A	152185750	0	126	A	G	0.218	-0.1674226	0.07038866	0.01893308	0.01685378	0.01970603
1	1_152185792_G_A	152185792	0	126	A	G	0.683	0.1381827	0.05983404	0.02260102	0.02023692	0.0233053
1	1_152185882_G_A	152185882	2	124	A	G	0.117	0.217331	0.1008578	0.03314033	0.03004863	0.03358151
1	1_152186494_G_A	152186494	0	126	A	G	0.016	0.5376723	0.2516948	0.03466014	0.03147262	0.03505822
1	1_152186496_C_T	152186496	0	126	T	C	0.016	0.5376723	0.2516948	0.03466014	0.03147262	0.03505822
1	1_152186497_T_A	152186497	0	126	A	T	0.016	0.5376723	0.2516948	0.03466014	0.03147262	0.03505822
1	1_152186708_C_T	152186708	0	126	T	C	0.063	0.3387761	0.1323551	0.01170045	0.01024998	0.01254101
1	1_152187276_C_T	152187276	0	126	T	C	0.143	-0.2051509	0.09806159	0.03850644	0.03508507	0.03879172
1	1_152187589_G_A	152187589	0	126	A	G	0.151	-0.2300122	0.09570464	0.01775105	0.01576785	0.01854224
1	1_152187628_A_G	152187628	0	126	G	A	0.151	-0.2248346	0.0956744	0.02037898	0.01818509	0.02112685
1	1_152188413_C_T	152188413	0	126	T	C	0.139	-0.2249015	0.09820054	0.02372549	0.02127778	0.0244057
1	1_152188940_A_G	152188940	0	126	G	A	0.032	-0.3843517	0.1813628	0.0360971	0.03282081	0.03645362
1	1_152189038_A_G	152189038	0	126	G	A	0.103	-0.3027569	0.1075389	0.005683587	0.004859487	0.00643671
1	1_152190452_T_C	152190452	0	126	C	T	0.623	0.1922382	0.07699211	0.01386334	0.01221371	0.01469646
1	1_152190477_C_T	152190477	0	126	T	C	0.107	0.2314039	0.1025957	0.02588429	0.02328043	0.02651506
1	1_152190682_G_A	152190682	0	126	A	G	0.21	-0.1833269	0.07348353	0.01393979	0.01228332	0.01477241
1	1_152190720_C_T	152190720	0	126	T	C	0.77	0.1435565	0.07109018	0.04564148	0.04181565	0.04570722
1	1_152190835_G_A	152190835	0	126	A	G	0.183	-0.2044087	0.07857423	0.01043084	0.00910269	0.01126859
1	1_152190945_C_T	152190945	0	126	T	C	0.183	-0.2044087	0.07857423	0.01043084	0.00910269	0.01126859
1	1_152191709_C_G	152191709	0	126	G	C	0.786	0.1870183	0.0738851	0.01263865	0.01110045	0.01347769
1	1_152191879_G_A	152191879	0	126	A	G	0.786	0.1870183	0.0738851	0.01263865	0.01110045	0.01347769
1	1_152192114_C_T	152192114	0	126	T	C	0.786	0.1870183	0.0738851	0.01263865	0.01110045	0.01347769
1	1_152192293_C_T	152192293	0	126	T	C	0.786	0.1870183	0.0738851	0.01263865	0.01110045	0.01347769
1	1_152192555_T_C	152192555	0	126	C	T	0.183	-0.2044087	0.07857423	0.01043084	0.00910269	0.01126859
1	1_152192631_C_T	152192631	0	126	T	C	0.786	0.1870183	0.0738851	0.01263865	0.01110045	0.01347769
1	1_152193121_G_T	152193121	0	126	T	G	0.786	0.1870183	0.0738851	0.01263865	0.01110045	0.01347769
1	1_152193291_G_T	152193291	0	126	T	G	0.786	0.1870183	0.0738851	0.01263865	0.01110045	0.01347769
1	1_152193544_A_G	152193544	0	126	G	A	0.786	0.1870183	0.0738851	0.01263865	0.01110045	0.01347769
1	1_152193851_C_T	152193851	0	126	T	C	0.786	0.1870183	0.0738851	0.01263865	0.01110045	0.01347769
1	1_152193990_A_G	152193990	0	126	G	A	0.786	0.1870183	0.0738851	0.01263865	0.01110045	0.01347769
1	1_152195579_G_A	152195579	0	126	A	G	0.21	-0.1833269	0.07348353	0.01393979	0.01228332	0.01477241
1	1_152276149_C_T	152276149	0	126	T	C	0.183	-0.2044087	0.07857423	0.01043084	0.00910269	0.01126859
1	1_152276459_C_T	152276459	0	126	T	C	0.183	-0.2339015	0.09085442	0.01123463	0.009828538	0.01207486
1	1_152276583_C_G	152276583	0	126	G	C	0.151	-0.2367746	0.09298333	0.01212786	0.01063716	0.01296808
1	1_152276659_T_C	152276659	0	126	C	T	0.135	-0.23538	0.1004055	0.02067928	0.01846198	0.02142161
1	1_152276660_G_C	152276660	0	126	C	G	0.135	-0.23538	0.1004055	0.02067928	0.01846198	0.02142161
1	1_152276671_C_T	152276671	0	126	T	C	0.139	-0.2527161	0.09895457	0.01188489	0.010417	0.01272538
1	1_152276699_A_G	152276699	0	126	G	A	0.187	-0.2380891	0.0911786	0.01015316	0.008852359	0.01098945
1	1_152276772_C_A	152276772	0	126	A	C	0.183	-0.2274408	0.07790033	0.00417484	0.003532344	0.004860057
1	1_152276871_A_G	152276871	0	126	G	A	0.194	-0.184859	0.07487281	0.01493432	0.0131899	0.01575909
1	1_152276889_A_G	152276889	0	126	G	A	0.202	-0.1760213	0.07534498	0.02111189	0.01886109	0.02184602
1	1_152277055_C_G	152277055	0	126	G	C	0.202	-0.1760213	0.07534498	0.02111189	0.01886109	0.02184602
1	1_152277168_A_G	152277168	0	126	G	A	0.202	-0.2041528	0.07403439	0.006719543	0.005777845	0.007504578
1	1_152277345_C_T	152277345	0	126	T	C	0.183	-0.2044087	0.07857423	0.01043084	0.00910269	0.01126859
1	1_152277396_T_C	152277396	0	126	C	T	0.21	-0.1833269	0.07348353	0.01393979	0.01228332	0.01477241
1	1_152277717_C_A	152277717	0	126	A	C	0.214	-0.1870183	0.0738851	0.01263865	0.01110045	0.01347769
1	1_152277822_T_C	152277822	0	126	C	T	0.202	-0.2089867	0.07322724	0.005074827	0.004322376	0.005804086
1	1_152277826_A_C	152277826	0	126	C	A	0.206	-0.213087	0.07362843	0.004505897	0.003822349	0.005208679
1	1_152278555_T_C	152278555	0	126	C	T	0.183	-0.2339015	0.09085442	0.01123463	0.009828538	0.01207486
1	1_152278689_C_A	152278689	0	126	A	C	0.21	-0.1833269	0.07348353	0.01393979	0.01228332	0.01477241
1	1_152278814_C_T	152278814	0	126	T	C	0.171	-0.26129	0.09169428	0.005140569	0.004380281	0.005872614
1	1_152278856_T_G	152278856	0	126	G	T	0.163	-0.2370089	0.09354056	0.01255171	0.01102155	0.01339101
1	1_152279019_G_A	152279019	0	126	A	G	0.163	-0.2370089	0.09354056	0.01255171	0.01102155	0.01339101
1	1_152279729_C_T	152279729	0	126	T	C	0.214	-0.1870183	0.0738851	0.01263865	0.01110045	0.01347769
1	1_152279841_G_C	152279841	0	126	C	G	0.214	-0.1870183	0.0738851	0.01263865	0.01110045	0.01347769
1	1_152279920_A_G	152279920	0	126	G	A	0.21	-0.1833269	0.07348353	0.01393979	0.01228332	0.01477241
1	1_152280032_T_C	152280032	0	126	C	T	0.21	-0.1833269	0.07348353	0.01393979	0.01228332	0.01477241
1	1_152280170_C_G	152280170	0	126	G	C	0.194	-0.2020532	0.08198911	0.01511724	0.01335686	0.01594031
1	1_152280265_C_G	152280265	0	126	G	C	0.183	-0.2339015	0.09085442	0.01123463	0.009828538	0.01207486
1	1_152280347_C_T	152280347	0	126	T	C	0.183	-0.2339015	0.09085442	0.01123463	0.009828538	0.01207486
1	1_152280372_G_A	152280372	0	126	A	G	0.214	-0.1870183	0.0738851	0.01263865	0.01110045	0.01347769
1	1_152280471_C_G	152280471	0	126	G	C	0.183	-0.2339015	0.09085442	0.01123463	0.009828538	0.01207486
1	1_152280736_T_C	152280736	0	126	C	T	0.187	-0.2380891	0.0911786	0.01015316	0.008852359	0.01098945
1	1_152280759_A_G	152280759	0	126	G	A	0.187	-0.2380891	0.0911786	0.01015316	0.008852359	0.01098945
1	1_152280782_A_G	152280782	0	126	G	A	0.222	-0.1785983	0.07438449	0.01785966	0.01586753	0.01864926
1	1_152280788_T_G	152280788	0	126	G	T	0.187	-0.2380891	0.0911786	0.01015316	0.008852359	0.01098945
1	1_152280864_A_G	152280864	0	126	G	A	0.214	-0.1870183	0.0738851	0.01263865	0.01110045	0.01347769
1	1_152280900_T_G	152280900	0	126	G	T	0.187	-0.2380891	0.0911786	0.01015316	0.008852359	0.01098945
1	1_152281007_A_G	152281007	0	126	G	A	0.167	-0.2415393	0.09390935	0.01130925	0.009896016	0.01214959
1	1_152281008_A_G	152281008	0	126	G	A	0.167	-0.2415393	0.09390935	0.01130925	0.009896016	0.01214959
1	1_152281039_G_A	152281039	0	126	A	G	0.167	-0.2415393	0.09390935	0.01130925	0.009896016	0.01214959
1	1_152281228_C_G	152281228	0	126	G	C	0.167	-0.2415393	0.09390935	0.01130925	0.009896016	0.01214959
1	1_152281290_A_G	152281290	0	126	G	A	0.167	-0.2415393	0.09390935	0.01130925	0.009896016	0.01214959
1	1_152281304_A_C	152281304	0	126	C	A	0.167	-0.2415393	0.09390935	0.01130925	0.009896016	0.01214959
1	1_152281479_G_T	152281479	0	126	T	G	0.222	-0.1785983	0.07438449	0.01785966	0.01586753	0.01864926
1	1_152281523_A_C	152281523	0	126	C	A	0.167	-0.2415393	0.09390935	0.01130925	0.009896016	0.01214959
1	1_152281534_A_T	152281534	0	126	T	A	0.171	-0.2535772	0.09293225	0.007299987	0.006294514	0.008098902
1	1_152281690_C_T	152281690	0	126	T	C	0.183	-0.2044087	0.07857423	0.01043084	0.00910269	0.01126859
1	1_152281948_G_A	152281948	0	126	A	G	0.183	-0.2044087	0.07857423	0.01043084	0.00910269	0.01126859
1	1_152282267_G_A	152282267	0	126	A	G	0.183	-0.2044087	0.07857423	0.01043084	0.00910269	0.01126859
1	1_152282311_C_T	152282311	0	126	T	C	0.183	-0.2044087	0.07857423	0.01043084	0.00910269	0.01126859
1	1_152282917_G_T	152282917	0	126	T	G	0.183	-0.2044087	0.07857423	0.01043084	0.00910269	0.01126859
1	1_152283236_T_C	152283236	0	126	C	T	0.21	-0.1833269	0.07348353	0.01393979	0.01228332	0.01477241
1	1_152283283_C_T	152283283	0	126	T	C	0.183	-0.2044087	0.07857423	0.01043084	0.00910269	0.01126859
1	1_152283862_G_C	152283862	0	126	C	G	0.222	-0.1785983	0.07438449	0.01785966	0.01586753	0.01864926
1	1_152283975_A_G	152283975	0	126	G	A	0.214	-0.1870183	0.0738851	0.01263865	0.01110045	0.01347769
1	1_152284549_G_C	152284549	0	126	C	G	0.032	-0.3843193	0.1813643	0.03611404	0.03283671	0.03647006
1	1_152284854_A_G	152284854	0	126	G	A	0.214	-0.1870183	0.0738851	0.01263865	0.01110045	0.01347769
1	1_152285099_C_T	152285099	0	126	T	C	0.21	-0.1833269	0.07348353	0.01393979	0.01228332	0.01477241
1	1_152285930_G_A	152285930	0	126	A	G	0.206	-0.174452	0.07382971	0.01971396	0.01757238	0.02047372
1	1_152286002_T_C	152286002	0	126	C	T	0.21	-0.1780592	0.07424105	0.01798206	0.0159799	0.01876986
1	1_152286032_C_T	152286032	0	126	T	C	0.183	-0.2044087	0.07857423	0.01043084	0.00910269	0.01126859
1	1_152286367_C_A	152286367	0	126	A	C	0.21	-0.1833269	0.07348353	0.01393979	0.01228332	0.01477241
1	1_152323132_G_T	152323132	0	126	T	G	0.21	-0.1641055	0.07638209	0.03365167	0.0305275	0.03407846
1	1_152325732_G_A	152325732	0	126	A	G	0.21	-0.1641055	0.07638209	0.03365167	0.0305275	0.03407846
1	1_152327469_C_T	152327469	0	126	T	C	0.175	-0.1991202	0.08373891	0.01896618	0.01688422	0.01973859
1	1_152327502_A_G	152327502	0	126	G	A	0.171	-0.1862361	0.08434658	0.02911456	0.02628693	0.02966474
1	1_152328411_A_G	152328411	0	126	G	A	0.246	-0.1713109	0.07372435	0.02179808	0.0194947	0.02251876
1	1_152329435_C_T	152329435	0	126	T	C	0.214	-0.1653228	0.07428365	0.02788079	0.0251373	0.02846257
1	1_152331240_G_A	152331240	0	126	A	G	0.21	-0.1641055	0.07638209	0.03365167	0.0305275	0.03407846
1	1_152382062_C_T	152382062	0	126	T	C	0.198	-0.1684072	0.07811858	0.03306331	0.02997652	0.03350665
1	1_152382120_C_T	152382120	0	126	T	C	0.198	-0.1684072	0.07811858	0.03306331	0.02997652	0.03350665
1	1_152384759_A_G	152384759	0	126	G	A	0.202	-0.1710016	0.07831811	0.03091849	0.02797062	0.03142085
1	1_152749027_C_T	152749027	0	126	T	C	0.06	0.3211342	0.1370625	0.02074917	0.01852644	0.02149019
1	1_152749039_T_C	152749039	0	126	C	T	0.071	0.3114236	0.1262124	0.0149947	0.013245	0.01581891
1	1_152749040_G_T	152749040	0	126	T	G	0.071	0.3114236	0.1262124	0.0149947	0.013245	0.01581891
1	1_152749045_C_T	152749045	0	126	T	C	0.071	0.3114236	0.1262124	0.0149947	0.013245	0.01581891
1	1_152976306_T_G	152976306	0	126	G	T	0.56	-0.16965	0.06732307	0.0130292	0.0114551	0.01386681
1	1_153004778_C_T	153004778	0	126	T	C	0.532	-0.144705	0.06577663	0.02969467	0.02682802	0.03022967
1	1_153004809_T_C	153004809	0	126	C	T	0.532	-0.144705	0.06577663	0.02969467	0.02682802	0.03022967
1	1_153004848_T_C	153004848	0	126	C	T	0.532	-0.144705	0.06577663	0.02969467	0.02682802	0.03022967
1	1_153004853_C_T	153004853	0	126	T	C	0.532	-0.144705	0.06577663	0.02969467	0.02682802	0.03022967
1	1_153004941_CTGCCACCCCAAGGTGCCTGAGCCCTGCCACCCCAAAGTGCCCGAGCCCTGCCAGCCCAAGGTTCCAGAGCCA_C	153004941	0	126	C	CTGCCACCCCAAGGTGCCTGAGCCCTGCCACCCCAAAGTGCCCGAGCCCTGCCAGCCCAAGGTTCCAGAGCCA	0.016	-0.4995103	0.2523284	0.04999954	0.04594325	0.04992691
1	1_153004983_C_T	153004983	0	126	T	C	0.532	-0.144705	0.06577663	0.02969467	0.02682802	0.03022967
1	1_153005156_C_T	153005156	0	126	T	C	0.532	-0.144705	0.06577663	0.02969467	0.02682802	0.03022967
1	1_153233535_T_TCGG	153233535	0	126	TCGG	T	0.012	0.6050562	0.2946269	0.04214801	0.03851574	0.04232258
1	1_153233991_A_ACTCTGGCGGCGG	153233991	0	126	ACTCTGGCGGCGG	A	0.746	0.2461212	0.06824368	0.0004507677	0.0003532812	0.0006864652
1	1_153234602_T_C	153234602	0	126	C	T	0.754	0.2356476	0.07016716	0.001046411	0.0008443716	0.001419158
1	1_153271524_C_T	153271524	0	126	T	C	0.377	-0.1546167	0.06280333	0.01521676	0.01344773	0.01603888
1	1_153279696_C_T	153279696	0	126	T	C	0.071	-0.2873516	0.1257288	0.02401045	0.0215418	0.02468436
1	1_153283179_A_G	153283179	0	126	G	A	0.5	0.1276662	0.0582371	0.03026453	0.02735988	0.03078443
1	1_153313044_C_T	153313044	0	126	T	C	0.079	-0.2519559	0.1243037	0.04484839	0.04106579	0.04493902
1	1_153320401_G_A	153320401	0	126	A	G	0.079	-0.2519559	0.1243037	0.04484839	0.04106579	0.04493902
1	1_153617749_C_T	153617749	0	126	T	C	0.036	0.4802453	0.1707121	0.00571914	0.004890918	0.00647353
1	1_154090199_A_T	154090199	0	126	T	A	0.06	-0.3225695	0.1363121	0.01953651	0.017409	0.02029934
1	1_154316996_G_A	154316996	0	126	A	G	0.024	0.428544	0.2112734	0.04469818	0.04092381	0.04479351
1	1_154562594_A_C	154562594	0	126	C	A	0.052	0.3385683	0.1449183	0.0211083	0.01885779	0.0218425
1	1_154686076_T_A	154686076	0	126	A	T	0.016	0.5813601	0.2525715	0.02304422	0.02064697	0.02373917
1	1_155058579_T_TCCCCCC	155058579	0	126	TCCCCCC	T	0.036	0.4459094	0.1696779	0.009692774	0.008437814	0.01052591
1	1_155108167_G_A	155108167	0	126	A	G	0.016	0.5380031	0.2516955	0.03455144	0.0313707	0.03495263
1	1_155148781_G_A	155148781	0	126	A	G	0.365	-0.1347793	0.06983583	0.05593503	0.05158267	0.05567101
1	1_155181843_G_T	155181843	0	126	T	G	0.548	-0.1256351	0.06512204	0.05602519	0.05166848	0.05575824
1	1_155182164_C_T	155182164	0	126	T	C	0.548	-0.1256351	0.06512204	0.05602519	0.05166848	0.05575824
1	1_155257818_C_T	155257818	0	126	T	C	0.016	0.5545914	0.2511027	0.029069	0.02624445	0.02962036
1	1_155291050_C_T	155291050	0	126	T	C	0.016	-0.4986587	0.2523615	0.050415	0.04633734	0.05032907
1	1_155291431_C_T	155291431	0	126	T	C	0.048	-0.3758327	0.1369823	0.006992725	0.006020834	0.007784615
1	1_155311658_C_T	155311658	0	126	T	C	0.052	-0.3100009	0.133682	0.02206175	0.01973833	0.02277712
1	1_156011444_T_C	156011444	0	126	C	T	0.619	0.144176	0.06687062	0.03304293	0.02995744	0.03348684
1	1_156146825_T_C	156146825	0	126	C	T	0.032	-0.3835148	0.1814042	0.03653878	0.03323554	0.03688237
1	1_156215562_G_A	156215562	0	126	A	G	0.294	-0.1919568	0.07213447	0.008836796	0.007668814	0.009661394
1	1_156230206_C_A	156230206	0	126	A	C	0.202	0.170733	0.07824259	0.03101853	0.02806408	0.03151819
1	1_156230429_A_G	156230429	0	126	G	A	0.294	-0.1919568	0.07213447	0.008836796	0.007668814	0.009661394
1	1_156231266_G_C	156231266	0	126	C	G	0.202	0.170733	0.07824259	0.03101853	0.02806408	0.03151819
1	1_156233143_A_G	156233143	0	126	G	A	0.294	-0.1919568	0.07213447	0.008836796	0.007668814	0.009661394
1	1_156233189_C_T	156233189	0	126	T	C	0.294	-0.1919568	0.07213447	0.008836796	0.007668814	0.009661394
1	1_156255456_G_A	156255456	0	126	A	G	0.313	-0.1720982	0.07193446	0.01826319	0.01623807	0.01904675
1	1_156256000_T_C	156256000	0	126	C	T	0.313	-0.1720982	0.07193446	0.01826319	0.01623807	0.01904675
1	1_156261491_G_C	156261491	0	126	C	G	0.19	0.1751604	0.07674475	0.02419911	0.02171665	0.02486881
1	1_156263097_A_G	156263097	0	126	G	A	0.313	-0.1720982	0.07193446	0.01826319	0.01623807	0.01904675
1	1_156263940_T_C	156263940	0	126	C	T	0.313	-0.1720982	0.07193446	0.01826319	0.01623807	0.01904675
1	1_156264000_G_A	156264000	0	126	A	G	0.313	-0.1720982	0.07193446	0.01826319	0.01623807	0.01904675
1	1_156269389_A_G	156269389	0	126	G	A	0.313	-0.1720982	0.07193446	0.01826319	0.01623807	0.01904675
1	1_156280671_A_T	156280671	0	126	T	A	0.313	-0.1720982	0.07193446	0.01826319	0.01623807	0.01904675
1	1_156281020_G_C	156281020	0	126	C	G	0.313	-0.1720982	0.07193446	0.01826319	0.01623807	0.01904675
1	1_156290656_T_C	156290656	0	126	C	T	0.048	0.3102417	0.1503255	0.04115724	0.03758139	0.04136224
1	1_156308031_GGA_G	156308031	0	126	G	GGA	0.313	-0.1720982	0.07193446	0.01826319	0.01623807	0.01904675
1	1_156347131_G_A	156347131	0	126	A	G	0.456	-0.1253015	0.06292327	0.04867796	0.04469032	0.04864753
1	1_156640673_G_GCCCCCCCCCC	156640673	0	126	GCCCCCCCCCC	G	0.032	-0.3810678	0.1941075	0.05190064	0.04774737	0.051767
1	1_156815338_A_C	156815338	0	126	C	A	0.02	0.54129	0.2254674	0.01787214	0.01587899	0.01866156
1	1_156897591_G_T	156897591	0	126	T	G	0.012	0.5645161	0.290841	0.05456728	0.05028143	0.05434757
1	1_156911128_T_A	156911128	0	126	A	T	0.016	0.5368199	0.2516941	0.0349425	0.0317374	0.03533247
1	1_158224577_G_C	158224577	0	126	C	G	0.06	0.3172804	0.1273587	0.01407355	0.01240513	0.01490525
1	1_158297960_C_T	158297960	0	126	T	C	0.143	0.2265879	0.0872805	0.0105868	0.009243388	0.01142523
1	1_158300604_C_T	158300604	0	126	T	C	0.016	0.5369093	0.2516941	0.03491273	0.03170948	0.03530356
1	1_158627263_T_A	158627263	0	126	A	T	0.06	-0.2870869	0.1404689	0.04312866	0.03944122	0.0432729
1	1_158913532_C_T	158913532	0	126	T	C	0.472	-0.1426485	0.06421814	0.02817478	0.0254111	0.02874912
1	1_158969797_A_G	158969797	0	126	G	A	0.02	0.5397972	0.2254641	0.01818125	0.01616281	0.01896606
1	1_158969936_T_C	158969936	0	126	C	T	0.02	0.5397972	0.2254641	0.01818125	0.01616281	0.01896606
1	1_158986477_G_C	158986477	0	126	C	G	0.75	-0.1620044	0.07503126	0.03279505	0.0297254	0.03324589
1	1_158990247_A_G	158990247	0	126	G	A	0.171	0.2663561	0.08072348	0.001269481	0.00103122	0.001680578
1	1_159002301_T_C	159002301	0	126	C	T	0.794	-0.2405162	0.07892925	0.002831671	0.002364398	0.003424275
1	1_159002377_C_A	159002377	0	126	A	C	0.794	-0.2405162	0.07892925	0.002831671	0.002364398	0.003424275
1	1_159002389_T_A	159002389	0	126	A	T	0.794	-0.2405162	0.07892925	0.002831671	0.002364398	0.003424275
1	1_159002557_A_G	159002557	0	126	G	A	0.794	-0.2405162	0.07892925	0.002831671	0.002364398	0.003424275
1	1_159021445_A_G	159021445	0	126	G	A	0.163	0.2263422	0.08252341	0.007010698	0.006036832	0.007803019
1	1_159024668_A_T	159024668	0	126	T	A	0.159	0.2139755	0.0831767	0.01129395	0.00988218	0.01213427
1	1_159785425_A_G	159785425	0	126	G	A	0.198	0.1578873	0.08088271	0.05322299	0.04900348	0.05304673
1	1_159889686_G_A	159889686	0	126	A	G	0.52	-0.1735643	0.06061232	0.004933541	0.004198017	0.005656629
1	1_160124875_G_A	160124875	0	126	A	G	0.762	0.1652949	0.07546965	0.03041006	0.02749575	0.03092608
1	1_160252904_G_A	160252904	0	126	A	G	0.012	0.6068505	0.2946049	0.04153701	0.03793945	0.04173037
1	1_160303542_C_A	160303542	0	126	A	C	0.044	-0.3209363	0.1563752	0.04227501	0.03863556	0.04244567
1	1_160593841_A_T	160593841	0	126	T	A	0.02	-0.4747591	0.2289594	0.0402254	0.03670326	0.04045882
1	1_160849030_T_A	160849030	0	126	A	T	0.706	-0.146958	0.06977976	0.03725188	0.03390547	0.03757447
1	1_160849060_G_A	160849060	0	126	A	G	0.71	-0.1552522	0.06957913	0.02748758	0.02477125	0.02807924
1	1_160849082_A_G	160849082	0	126	G	A	0.718	-0.1457723	0.06955945	0.03818064	0.03477862	0.03847565
1	1_160850936_T_C	160850936	0	126	C	T	0.718	-0.1457723	0.06955945	0.03818064	0.03477862	0.03847565
1	1_160851826_A_T	160851826	0	126	T	A	0.71	-0.1552522	0.06957913	0.02748758	0.02477125	0.02807924
1	1_160851894_G_A	160851894	0	126	A	G	0.702	-0.17682	0.0695129	0.01221776	0.01071865	0.01305784
1	1_160852022_C_T	160852022	0	126	T	C	0.71	-0.1552522	0.06957913	0.02748758	0.02477125	0.02807924
1	1_160852046_T_C	160852046	0	126	C	T	0.71	-0.1552522	0.06957913	0.02748758	0.02477125	0.02807924
1	1_160920809_A_G	160920809	0	126	G	A	0.544	-0.1489731	0.06250617	0.01869957	0.01663908	0.0194763
1	1_160920966_C_T	160920966	0	126	T	C	0.544	-0.1489731	0.06250617	0.01869957	0.01663908	0.0194763
1	1_161008803_G_T	161008803	0	126	T	G	0.159	0.2260066	0.07994199	0.005490763	0.00468914	0.006236782
1	1_161013121_C_T	161013121	0	126	T	C	0.571	-0.2073617	0.05820888	0.0005252071	0.0004138117	0.0007821869
1	1_161017556_C_T	161017556	0	126	T	C	0.353	-0.1382055	0.06088339	0.02496237	0.02242451	0.02561473
1	1_161018896_C_T	161018896	0	126	T	C	0.024	-0.4881755	0.206224	0.01949594	0.01737165	0.02025947
1	1_161019040_G_C	161019040	0	126	C	G	0.571	-0.2073617	0.05820888	0.0005252071	0.0004138117	0.0007821869
1	1_161022380_G_A	161022380	0	126	A	G	0.75	-0.1474819	0.07044957	0.03838114	0.0349672	0.03867016
1	1_161022639_C_G	161022639	0	126	G	C	0.571	-0.2073617	0.05820888	0.0005252071	0.0004138117	0.0007821869
1	1_161049499_G_A	161049499	0	126	A	G	0.02	-0.4790807	0.2264808	0.03643603	0.03313904	0.03678263
1	1_161069544_G_A	161069544	0	126	A	G	0.079	0.2971022	0.1130233	0.009673795	0.008420738	0.01050678
1	1_161088911_A_G	161088911	0	126	G	A	0.02	0.5382081	0.2280912	0.01988116	0.01772636	0.02063799
1	1_161168004_C_T	161168004	0	126	T	C	0.198	0.2024056	0.07555187	0.00840247	0.007279547	0.009221264
1	1_161192845_CCACACACACACA_CCA	161192845	0	126	CCA	CCACACACACACA	0.147	-0.185504	0.09029314	0.04206653	0.03843888	0.04224361
1	1_161275641_G_C	161275641	0	126	C	G	0.04	0.3347147	0.1717513	0.05361074	0.049372	0.05342196
1	1_161495477_A_T	161495477	0	126	T	A	0.675	-0.1375467	0.06388323	0.03327916	0.03017862	0.03371644
1	1_161495885_T_C	161495885	0	126	C	T	0.786	-0.1477355	0.0742123	0.04874737	0.0447561	0.04871474
1	1_161680258_G_A	161680258	0	126	A	G	0.587	0.159007	0.06564471	0.01689577	0.01498356	0.01769874
1	1_161681661_C_G	161681661	0	126	G	C	0.266	-0.1833979	0.06993359	0.009842426	0.008572495	0.01067669
1	1_161681780_A_G	161681780	0	126	G	A	0.27	-0.18397	0.06978054	0.009468018	0.00823567	0.01029926
1	1_161683136_G_A	161683136	0	126	A	G	0.48	0.1606363	0.06258482	0.01147593	0.01004678	0.01231643
1	1_161696782_G_C	161696782	0	126	C	G	0.484	0.142103	0.06490928	0.03048156	0.02756252	0.03099567
1	1_161696998_C_G	161696998	0	126	G	C	0.48	0.1532231	0.06525483	0.02047985	0.01827808	0.02122587
1	1_161993192_T_C	161993192	0	126	C	T	0.052	-0.3499686	0.1442357	0.01671367	0.01481674	0.01751898
1	1_162313735_C_T	162313735	0	126	T	C	0.349	-0.1433854	0.07151628	0.04718372	0.04327498	0.04720077
1	1_162344069_G_A	162344069	0	126	A	G	0.071	-0.241504	0.112745	0.03417786	0.03102053	0.03458972
1	1_162346607_A_G	162346607	0	126	G	A	0.02	0.5509325	0.2243793	0.01548346	0.01369133	0.01630292
1	1_162773984_T_C	162773984	0	126	C	T	0.024	-0.5442279	0.2086781	0.0102451	0.008935218	0.01108191
1	1_162775267_C_T	162775267	0	126	T	C	0.282	0.1580781	0.07236423	0.03083901	0.02789636	0.03134351
1	1_162782145_A_G	162782145	0	126	G	A	0.024	-0.5442279	0.2086781	0.0102451	0.008935218	0.01108191
1	1_163313695_TA_T	163313695	0	126	T	TA	0.02	-0.4906804	0.225527	0.03150499	0.0285187	0.03199143
1	1_163318934_A_C	163318934	0	126	C	A	0.103	0.2467115	0.1036671	0.01886955	0.01679536	0.01964354
1	1_165370475_G_C	165370475	0	126	C	G	0.19	-0.1865488	0.08077123	0.02259174	0.02022834	0.02329622
1	1_165376227_C_CCG	165376227	0	126	CCG	C	0.698	0.1501573	0.07159751	0.03803694	0.03464348	0.03833623
1	1_165376229_C_G	165376229	0	126	G	C	0.786	0.2005619	0.07916594	0.01256252	0.01103136	0.01340179
1	1_165378737_C_T	165378737	0	126	T	C	0.044	0.3850655	0.1552097	0.01446609	0.01276282	0.01529485
1	1_165859640_G_GTGT	165859640	0	126	GTGT	G	0.131	0.1868196	0.09318992	0.04720711	0.04329713	0.04722342
1	1_166591271_T_C	166591271	0	126	C	T	0.183	0.2478825	0.07785445	0.001844095	0.001517342	0.002335941
1	1_166831404_A_C	166831404	0	126	C	A	0.385	-0.1396019	0.06052996	0.02277957	0.02040209	0.02348012
1	1_166831703_C_CA	166831703	0	126	CA	C	0.381	-0.1470817	0.06014291	0.015891	0.01406384	0.0167061
1	1_166833199_C_A	166833199	0	126	A	C	0.385	-0.1396019	0.06052996	0.02277957	0.02040209	0.02348012
1	1_166905927_C_T	166905927	0	126	T	C	0.163	0.2565637	0.08394427	0.002752948	0.002296453	0.003338779
1	1_166908811_G_A	166908811	0	126	A	G	0.02	0.5411465	0.2254668	0.01790153	0.01590597	0.01869052
1	1_167059462_G_C	167059462	0	126	C	G	0.48	-0.1199293	0.05887045	0.04379611	0.04007151	0.04391962
1	1_167059575_G_T	167059575	0	126	T	G	0.409	-0.145174	0.06061933	0.01814879	0.01613299	0.01893408
1	1_167083068_G_A	167083068	0	126	A	G	0.016	-0.5275333	0.2544283	0.04023912	0.03671618	0.04047212
1	1_167088473_C_A	167088473	0	126	A	C	0.254	0.1786372	0.06852615	0.0102772	0.008964153	0.01111418
1	1_167778843_G_A	167778843	0	126	A	G	0.389	-0.1219153	0.06131316	0.04900562	0.04500087	0.04896475
1	1_167849327_G_A	167849327	0	126	A	G	0.067	-0.3531244	0.1280273	0.006706872	0.005766582	0.007491574
1	1_167849658_C_G	167849658	0	126	G	C	0.063	-0.3431064	0.1322464	0.01063477	0.009286678	0.01147339
1	1_167865871_G_A	167865871	0	126	A	G	0.063	-0.3431064	0.1322464	0.01063477	0.009286678	0.01147339
1	1_167871297_GA_G	167871297	0	126	G	GA	0.21	-0.2041859	0.08649902	0.01983314	0.01768213	0.02059081
1	1_167887642_C_T	167887642	0	126	T	C	0.06	-0.3325363	0.1370577	0.01671877	0.01482141	0.01752401
1	1_167893778_G_GA	167893778	0	126	GA	G	0.044	0.3981029	0.1565988	0.01226819	0.01076437	0.01310816
1	1_168105496_T_A	168105496	0	126	A	T	0.044	-0.4433825	0.155525	0.005120975	0.00436302	0.005852195
1	1_168153090_A_T	168153090	0	126	T	A	0.23	-0.1669909	0.0754139	0.02866415	0.02586706	0.02922598
1	1_168153370_A_G	168153370	0	126	G	A	0.226	-0.1792651	0.07532084	0.01886087	0.01678738	0.019635
1	1_168160781_C_T	168160781	0	126	T	C	0.032	-0.3847732	0.1813436	0.03587795	0.03261509	0.03624085
1	1_168165888_T_G	168165888	0	126	G	T	0.032	-0.3847732	0.1813436	0.03587795	0.03261509	0.03624085
1	1_168278149_G_A	168278149	0	126	A	G	0.016	0.5365437	0.2516942	0.03503465	0.03182383	0.03542197
1	1_168549297_C_T	168549297	0	126	T	C	0.016	-0.4846553	0.2522418	0.05701508	0.0526109	0.05671601
1	1_169511403_G_A	169511403	0	126	A	G	0.012	0.6067018	0.2946065	0.04158715	0.03798673	0.04177897
1	1_169586220_GT_G	169586220	0	126	G	GT	0.143	-0.3175613	0.09724484	0.001418221	0.001156446	0.00185241
1	1_169665632_T_C	169665632	0	126	C	T	0.325	-0.175653	0.0676851	0.01061422	0.009268135	0.01145276
1	1_169676486_A_G	169676486	0	126	G	A	0.27	-0.1711333	0.06735606	0.01231679	0.01080845	0.01315667
1	1_169679553_C_T	169679553	0	126	T	C	0.27	-0.1711333	0.06735606	0.01231679	0.01080845	0.01315667
1	1_169698825_T_G	169698825	0	126	G	T	0.698	-0.1674612	0.07644472	0.03038031	0.02746797	0.03089712
1	1_169699819_G_A	169699819	0	126	A	G	0.44	-0.1340197	0.06431546	0.03926693	0.0358007	0.03952936
1	1_171080080_G_A	171080080	0	126	A	G	0.107	0.2529346	0.0978193	0.01089273	0.009519581	0.01173221
1	1_173157764_G_A	173157764	0	126	A	G	0.139	0.1704933	0.08629585	0.05044786	0.04636851	0.05036088
1	1_174417231_G_A	174417231	0	126	A	G	0.944	0.3739763	0.1388608	0.008073555	0.006985196	0.008887229
1	1_175116046_CT_C	175116046	0	126	C	CT	0.079	-0.2568545	0.1210957	0.03593844	0.03267186	0.03629958
1	1_177198998_T_C	177198998	0	126	C	T	0.278	-0.2037901	0.0771174	0.009306088	0.00809013	0.01013582
1	1_177250670_G_A	177250670	0	126	A	G	0.282	-0.1777592	0.07436223	0.01835745	0.01632466	0.01913955
1	1_177929940_G_A	177929940	0	126	A	G	0.19	0.1546876	0.07687586	0.04640413	0.04253712	0.04644583
1	1_177930096_T_C	177930096	0	126	C	T	0.274	-0.1713841	0.07198088	0.01881472	0.01674494	0.01958959
1	1_178483231_G_A	178483231	0	126	A	G	0.417	0.1193361	0.06180923	0.05583847	0.05149077	0.05557758
1	1_178489978_T_G	178489978	0	126	G	T	0.417	0.1193361	0.06180923	0.05583847	0.05149077	0.05557758
1	1_179052002_T_G	179052002	0	126	G	T	0.103	-0.2535196	0.09628438	0.009557498	0.008316129	0.01038953
1	1_179055020_C_T	179055020	0	126	T	C	0.127	0.1810143	0.08858347	0.04316313	0.03947377	0.04330631
1	1_179084080_T_G	179084080	0	126	G	T	0.111	-0.2282202	0.09161898	0.01408351	0.0124142	0.01491514
1	1_180144485_G_A	180144485	0	126	A	G	0.214	0.1747565	0.07963103	0.03008752	0.02719464	0.03061214
1	1_180148012_G_C	180148012	0	126	C	G	0.214	0.1747565	0.07963103	0.03008752	0.02719464	0.03061214
1	1_180158668_C_T	180158668	0	126	T	C	0.214	0.1747565	0.07963103	0.03008752	0.02719464	0.03061214
1	1_180159654_C_T	180159654	0	126	T	C	0.214	0.1747565	0.07963103	0.03008752	0.02719464	0.03061214
1	1_180159657_C_T	180159657	0	126	T	C	0.214	0.1747565	0.07963103	0.03008752	0.02719464	0.03061214
1	1_180217656_G_A	180217656	0	126	A	G	0.06	0.3112519	0.1363661	0.02419323	0.02171121	0.02486307
1	1_180849494_T_C	180849494	0	126	C	T	0.472	-0.1332363	0.06355691	0.03811913	0.03472077	0.03841597
1	1_180974596_C_T	180974596	0	126	T	C	0.016	-0.4992031	0.25234	0.0501488	0.04608481	0.05007139
1	1_181018258_G_A	181018258	0	126	A	G	0.04	-0.4048411	0.1619097	0.01373176	0.01209394	0.01456571
1	1_181058313_G_A	181058313	0	126	A	G	0.381	-0.1323035	0.06647242	0.04878773	0.04479435	0.04875381
1	1_181058618_C_G	181058618	0	126	G	C	0.381	-0.1323035	0.06647242	0.04878773	0.04479435	0.04875381
1	1_181144597_C_G	181144597	0	126	G	C	0.206	0.1777327	0.07820297	0.02479359	0.02226792	0.02544983
1	1_181686216_T_C	181686216	0	126	C	T	0.742	0.1532747	0.07368684	0.03961151	0.0361251	0.03986353
1	1_181731657_CT_C	181731657	0	126	C	CT	0.012	0.5654986	0.2908362	0.05415025	0.04988488	0.05394403
1	1_181762760_G_A	181762760	0	126	A	G	0.063	0.3125629	0.1328888	0.02027119	0.01808573	0.02102103
1	1_182520362_TCA_T	182520362	0	126	T	TCA	0.111	-0.2200498	0.1013812	0.03190447	0.02889221	0.03237997
1	1_182522552_C_T	182522552	0	126	T	C	0.329	-0.1370017	0.06547932	0.03848571	0.03506556	0.0387716
1	1_182551337_A_C	182551337	0	126	C	A	0.575	0.1186216	0.06007829	0.05058962	0.046503	0.05049809
1	1_182640851_T_G	182640851	0	126	G	T	0.052	0.3262864	0.1449198	0.02614352	0.02352128	0.02676809
1	1_182640864_T_C	182640864	0	126	C	T	0.056	0.3203549	0.1449028	0.028912	0.02609808	0.02946743
1	1_183177218_A_G	183177218	0	126	G	A	0.373	-0.1397902	0.06620909	0.03678342	0.03346533	0.03711983
1	1_183184690_C_T	183184690	0	126	T	C	0.103	0.2240227	0.1121071	0.04790874	0.04396155	0.04790279
1	1_183914681_T_A	183914681	0	126	A	T	0.016	0.536584	0.2516942	0.03502121	0.03181122	0.03540892
1	1_184765072_A_G	184765072	0	126	G	A	0.06	0.2576486	0.1270991	0.04482662	0.04104521	0.04491793
1	1_185113152_G_A	185113152	0	126	A	G	0.016	0.5812778	0.2525721	0.02306355	0.02066486	0.02375808
1	1_185902978_T_C	185902978	0	126	C	T	0.02	0.5582701	0.2516721	0.02838878	0.02561046	0.02895767
1	1_185986239_C_T	185986239	0	126	T	C	0.016	0.5803163	0.2525801	0.02329087	0.02087529	0.02398053
1	1_186064616_T_C	186064616	0	126	C	T	0.012	0.5652448	0.2908373	0.05425754	0.04998689	0.05404786
1	1_186092103_C_T	186092103	0	126	T	C	0.012	0.5652448	0.2908373	0.05425754	0.04998689	0.05404786
1	1_186099180_C_T	186099180	0	126	T	C	0.012	0.5652448	0.2908373	0.05425754	0.04998689	0.05404786
1	1_186105743_TAA_T	186105743	0	126	T	TAA	0.012	0.5652448	0.2908373	0.05425754	0.04998689	0.05404786
1	1_186114828_AT_A	186114828	0	126	A	AT	0.012	0.5652448	0.2908373	0.05425754	0.04998689	0.05404786
1	1_186114832_T_A	186114832	0	126	A	T	0.012	0.5652448	0.2908373	0.05425754	0.04998689	0.05404786
1	1_186114835_AG_A	186114835	0	126	A	AG	0.012	0.5652448	0.2908373	0.05425754	0.04998689	0.05404786
1	1_186114839_T_TGGC	186114839	0	126	TGGC	T	0.012	0.5652448	0.2908373	0.05425754	0.04998689	0.05404786
1	1_186114842_G_C	186114842	0	126	C	G	0.012	0.5652448	0.2908373	0.05425754	0.04998689	0.05404786
1	1_186114844_AGCC_A	186114844	0	126	A	AGCC	0.012	0.5652448	0.2908373	0.05425754	0.04998689	0.05404786
1	1_186114850_T_TC	186114850	0	126	TC	T	0.012	0.5652448	0.2908373	0.05425754	0.04998689	0.05404786
1	1_186114853_C_CA	186114853	0	126	CA	C	0.012	0.5652448	0.2908373	0.05425754	0.04998689	0.05404786
1	1_186114855_T_A	186114855	0	126	A	T	0.012	0.5652448	0.2908373	0.05425754	0.04998689	0.05404786
1	1_186275564_C_T	186275564	0	126	T	C	0.028	0.4236255	0.1927648	0.0298637	0.02698574	0.03039424
1	1_186281400_C_T	186281400	0	126	T	C	0.028	0.4236255	0.1927648	0.0298637	0.02698574	0.03039424
1	1_186291512_T_C	186291512	0	126	C	T	0.028	0.4236255	0.1927648	0.0298637	0.02698574	0.03039424
1	1_186301447_T_C	186301447	0	126	C	T	0.028	0.4236255	0.1927648	0.0298637	0.02698574	0.03039424
1	1_186321249_A_AT	186321249	0	126	AT	A	0.028	0.4236255	0.1927648	0.0298637	0.02698574	0.03039424
1	1_186919732_A_T	186919732	0	126	T	A	0.921	0.2297146	0.1146336	0.04729576	0.04338106	0.04730926
1	1_186919863_G_A	186919863	0	126	A	G	0.056	0.2754899	0.1408996	0.05284343	0.04864284	0.05267942
1	1_186925168_A_G	186925168	0	126	G	A	0.921	0.2297146	0.1146336	0.04729576	0.04338106	0.04730926
1	1_186925194_T_C	186925194	0	126	C	T	0.921	0.2297146	0.1146336	0.04729576	0.04338106	0.04730926
1	1_186925552_T_C	186925552	0	126	C	T	0.921	0.2297146	0.1146336	0.04729576	0.04338106	0.04730926
1	1_192997336_A_C	192997336	0	126	C	A	0.016	0.5325394	0.2520051	0.03662039	0.03331219	0.03696159
1	1_193053675_T_C	193053675	0	126	C	T	0.016	0.5325394	0.2520051	0.03662039	0.03331219	0.03696159
1	1_193053762_C_T	193053762	0	126	T	C	0.016	0.5325394	0.2520051	0.03662039	0.03331219	0.03696159
1	1_193117124_A_T	193117124	0	126	T	A	0.016	0.5325394	0.2520051	0.03662039	0.03331219	0.03696159
1	1_193218793_T_G	193218793	0	126	G	T	0.016	0.5325394	0.2520051	0.03662039	0.03331219	0.03696159
1	1_197059221_G_GA	197059221	0	126	GA	G	0.063	-0.2559882	0.1328778	0.05636877	0.05199553	0.05609068
1	1_197141261_A_G	197141261	0	126	G	A	0.02	-0.5093188	0.2260535	0.02603992	0.02342501	0.02666697
1	1_197150256_GA_G	197150256	0	126	G	GA	0.111	-0.2789677	0.1061659	0.009701306	0.008445491	0.01053451
1	1_200080464_CAA_CA	200080464	0	126	CA	CAA	0.103	-0.2120576	0.1095821	0.05528645	0.05096551	0.05504346
1	1_200880978_C_T	200880978	0	126	T	C	0.679	-0.1471343	0.07259754	0.04487176	0.04108788	0.04496166
1	1_200944840_T_G	200944840	0	126	G	T	0.651	-0.1573897	0.06766083	0.02166027	0.0193674	0.0223837
1	1_200957697_A_G	200957697	0	126	G	A	0.313	0.1486824	0.06962488	0.03472094	0.03152963	0.03511728
1	1_200960307_G_A	200960307	0	126	A	G	0.349	0.1573897	0.06766083	0.02166027	0.0193674	0.0223837
1	1_200967490_A_G	200967490	0	126	G	A	0.516	0.1432738	0.0643208	0.02774828	0.02501392	0.0283334
1	1_201022779_C_G	201022779	0	126	G	C	0.075	0.2433036	0.1245114	0.0529814	0.04877392	0.05281293
1	1_201044748_A_G	201044748	0	126	G	A	0.758	-0.1442904	0.07100376	0.04430972	0.04055671	0.0444172
1	1_201054197_G_T	201054197	0	126	T	G	0.218	0.1545555	0.07809068	0.05004781	0.04598903	0.04997363
1	1_201166435_T_C	201166435	0	126	C	T	0.901	-0.2113278	0.1073912	0.05135611	0.0472304	0.05123997
1	1_201168803_G_T	201168803	0	126	T	G	0.044	-0.3163794	0.1598909	0.05010031	0.04603882	0.05002446
1	1_201170772_A_G	201170772	0	126	G	A	0.909	-0.221418	0.1107375	0.04777787	0.0438376	0.04777608
1	1_201170824_C_G	201170824	0	126	G	C	0.909	-0.221418	0.1107375	0.04777787	0.0438376	0.04777608
1	1_201183436_C_T	201183436	0	126	T	C	0.012	0.5653098	0.290837	0.05423003	0.04996074	0.05402124
1	1_201286678_C_T	201286678	0	126	T	C	0.234	0.1539858	0.07989463	0.05625947	0.05189148	0.05598493
1	1_201286771_C_T	201286771	0	126	T	C	0.234	0.1539858	0.07989463	0.05625947	0.05189148	0.05598493
1	1_201291283_C_T	201291283	0	126	T	C	0.234	0.1539858	0.07989463	0.05625947	0.05189148	0.05598493
1	1_201350983_C_T	201350983	0	126	T	C	0.032	-0.3841738	0.1813712	0.03619024	0.03290825	0.03654403
1	1_201351313_A_G	201351313	0	126	G	A	0.032	-0.3841738	0.1813712	0.03619024	0.03290825	0.03654403
1	1_201351337_C_T	201351337	0	126	T	C	0.032	-0.3841738	0.1813712	0.03619024	0.03290825	0.03654403
1	1_201353825_C_T	201353825	0	126	T	C	0.036	-0.3912465	0.1809251	0.03253266	0.02947984	0.0329908
1	1_201383616_A_G	201383616	0	126	G	A	0.857	-0.2273054	0.09767114	0.02159986	0.0193116	0.02232448
1	1_201383643_A_C	201383643	0	126	C	A	0.853	-0.2447612	0.09631486	0.01229893	0.01079225	0.01313884
1	1_201924749_G_C	201924749	0	126	C	G	0.222	0.1605164	0.07732527	0.04000751	0.03649802	0.04024754
1	1_202932154_G_A	202932154	0	126	A	G	0.02	-0.5095189	0.2260447	0.02597686	0.02336643	0.02660542
1	1_202935819_C_A	202935819	0	126	A	C	0.02	-0.5095189	0.2260447	0.02597686	0.02336643	0.02660542
1	1_203018773_T_A	203018773	0	126	A	T	0.036	-0.3792082	0.171471	0.02886409	0.02605342	0.02942076
1	1_203018777_G_C	203018777	0	126	C	G	0.016	-0.4988458	0.252354	0.05032327	0.04625032	0.05024028
1	1_203023122_A_C	203023122	0	126	C	A	0.21	0.1625246	0.07658952	0.03585828	0.03259662	0.03622175
1	1_203023240_G_GGC	203023240	0	126	GGC	G	0.21	0.1625246	0.07658952	0.03585828	0.03259662	0.03622175
1	1_203025209_G_C	203025209	0	126	C	G	0.183	0.1713939	0.08408941	0.04368825	0.03996963	0.04381511
1	1_203025314_C_T	203025314	0	126	T	C	0.02	-0.4909396	0.2255168	0.03140947	0.02842942	0.03189852
1	1_203030207_G_A	203030207	0	126	A	G	0.067	-0.4218066	0.1263115	0.001114017	0.0009008684	0.001498914
1	1_203032922_C_T	203032922	0	126	T	C	0.337	0.1816792	0.07337391	0.01465483	0.01293492	0.01548204
1	1_203036757_T_C	203036757	0	126	C	T	0.504	0.1671349	0.0640361	0.01018772	0.0088835	0.01102421
1	1_203098275_T_G	203098275	0	126	G	T	0.306	-0.138115	0.06410819	0.03317409	0.03008024	0.03361433
1	1_203154532_A_G	203154532	0	126	G	A	0.679	-0.1331934	0.06843166	0.05390914	0.04965565	0.05371072
1	1_203155412_G_A	203155412	0	126	A	G	0.048	-0.4279168	0.1479263	0.004523572	0.003837853	0.005227244
1	1_203155703_A_T	203155703	0	126	T	A	0.147	-0.2304905	0.09418314	0.01581889	0.01399791	0.01663479
1	1_203453299_GCC_G	203453299	0	126	G	GCC	0.024	-0.4885234	0.2062095	0.01940289	0.01728601	0.02016801
1	1_203453306_C_G	203453306	0	126	G	C	0.032	-0.5054893	0.1782877	0.005361746	0.004575273	0.006102782
1	1_203652444_A_G	203652444	0	126	G	A	0.897	0.3545841	0.102208	0.0007220024	0.0005751756	0.001028328
1	1_203667409_T_C	203667409	0	126	C	T	0.897	0.3545841	0.102208	0.0007220024	0.0005751756	0.001028328
1	1_203679934_A_G	203679934	0	126	G	A	0.476	0.1662467	0.06708693	0.01457672	0.01286369	0.01540458
1	1_203709034_A_G	203709034	0	126	G	A	0.619	0.1809854	0.06603526	0.007051463	0.006073122	0.007844751
1	1_203740057_G_A	203740057	0	126	A	G	0.016	0.537135	0.2516941	0.03483772	0.03163914	0.03523071
1	1_204086324_C_T	204086324	0	126	T	C	0.044	-0.3130815	0.1565454	0.0477279	0.04379027	0.04772769
1	1_204230576_C_T	204230576	0	126	T	C	0.012	0.5652406	0.2908373	0.05425933	0.04998859	0.05404959
1	1_204400737_T_C	204400737	0	126	C	T	0.016	0.5295913	0.2543927	0.03945264	0.03597553	0.03970947
1	1_204434302_T_A	204434302	0	126	A	T	0.02	-0.4904945	0.2255346	0.03157376	0.02858299	0.03205832
1	1_204494756_GT_G	204494756	0	126	G	GT	0.071	-0.2976944	0.1257012	0.01944261	0.01732257	0.02020705
1	1_204587240_G_A	204587240	0	126	A	G	0.472	-0.1490396	0.06745389	0.02900624	0.02618594	0.02955923
1	1_204943701_A_G	204943701	0	126	G	A	0.036	0.3333025	0.1716544	0.05447794	0.05019647	0.05426112
1	1_205028883_CAG_C	205028883	0	126	C	CAG	0.536	0.1245539	0.06450236	0.05580326	0.05145726	0.05554351
1	1_205041015_G_A	205041015	0	126	A	G	0.496	0.1452221	0.06259915	0.02200962	0.01969016	0.02272605
1	1_205385498_C_T	205385498	0	126	T	C	0.865	0.2057061	0.09357357	0.02981204	0.02693753	0.03034394
1	1_205435699_C_T	205435699	0	126	T	C	0.032	-0.3722606	0.1809451	0.04178728	0.03817547	0.04197295
1	1_205554085_G_C	205554085	0	126	C	G	0.464	0.1332992	0.06015116	0.02854127	0.02575254	0.02910625
1	1_205554095_A_C	205554095	0	126	C	A	0.456	0.1368418	0.06115998	0.02707291	0.02438539	0.02767485
1	1_205561372_C_T	205561372	0	126	T	C	0.21	0.1565912	0.07425852	0.037013	0.03368101	0.03734264
1	1_205568442_G_A	205568442	0	126	A	G	0.425	-0.1584919	0.06631403	0.01837792	0.01634347	0.01915971
1	1_205615791_A_G	205615791	0	126	G	A	0.341	0.1363629	0.06236155	0.03067603	0.02774413	0.03118492
1	1_205615936_T_TA	205615936	0	126	TA	T	0.127	0.2024651	0.1019031	0.04918094	0.04516705	0.04913448
1	1_205740668_G_C	205740668	0	126	C	G	0.032	0.4233731	0.180668	0.02072794	0.01850686	0.02146936
1	1_205764640_G_A	205764640	0	126	A	G	0.786	0.163633	0.07569063	0.03258085	0.02952494	0.03303766
1	1_205896431_A_C	205896431	0	126	C	A	0.016	0.5380771	0.2516957	0.03452718	0.03134796	0.03492907
1	1_206239403_C_T	206239403	0	126	T	C	0.063	0.2947203	0.1240729	0.01908873	0.01699694	0.01985912
1	1_206239415_C_T	206239415	0	126	T	C	0.063	0.2947203	0.1240729	0.01908873	0.01699694	0.01985912
1	1_206239574_T_C	206239574	0	126	C	T	0.071	0.3130406	0.1219997	0.0115005	0.01006901	0.01234101
1	1_206240271_G_A	206240271	0	126	A	G	0.075	0.3209018	0.117248	0.007128376	0.006141611	0.007923455
1	1_206241722_CAGT_C	206241722	0	126	C	CAGT	0.032	-0.5057197	0.1782755	0.005338405	0.004554682	0.006078519
1	1_207252395_A_C	207252395	0	126	C	A	0.028	-0.4968133	0.190695	0.01032184	0.009004405	0.01115906
1	1_207262980_T_G	207262980	0	126	G	T	0.532	0.1418468	0.06351428	0.02735176	0.02464484	0.02794679
1	1_207263829_A_G	207263829	0	126	G	A	0.52	0.1427145	0.06338972	0.02615088	0.02352812	0.02677527
1	1_207648173_T_C	207648173	0	126	C	T	0.091	-0.2129835	0.1038105	0.04234333	0.03870002	0.04251187
1	1_207653364_A_G	207653364	0	126	G	A	0.056	-0.2828612	0.1408524	0.04682959	0.04293976	0.04685785
1	1_207679480_C_A	207679480	0	126	A	C	0.016	0.5812602	0.2525722	0.02306766	0.02066867	0.0237621
1	1_207760773_C_T	207760773	0	126	T	C	0.234	-0.1478884	0.07388492	0.04754587	0.04361789	0.04755144
1	1_207818719_G_A	207818719	0	126	A	G	0.401	0.151513	0.07035014	0.03323066	0.03013321	0.03366931
1	1_207851611_A_G	207851611	0	126	G	A	0.556	0.1315771	0.06447603	0.0434371	0.03973245	0.04357177
1	1_207870945_C_T	207870945	0	126	T	C	0.012	0.5644573	0.2908414	0.05459238	0.0503053	0.05437186
1	1_208390469_C_T	208390469	0	126	T	C	0.194	-0.1647479	0.07932367	0.03990897	0.03640522	0.040152
1	1_209786078_G_A	209786078	0	126	A	G	0.623	-0.1443617	0.06549161	0.02938083	0.02653525	0.02992407
1	1_209800230_C_T	209800230	0	126	T	C	0.02	-0.4952079	0.2514491	0.05117167	0.04705534	0.05106146
1	1_209800341_C_T	209800341	0	126	T	C	0.02	-0.4952079	0.2514491	0.05117167	0.04705534	0.05106146
1	1_210003489_A_G	210003489	0	126	G	A	0.016	0.6137979	0.3107914	0.05053198	0.04644832	0.0504423
1	1_210008554_A_C	210008554	0	126	C	A	0.016	0.6137979	0.3107914	0.05053198	0.04644832	0.0504423
1	1_210577831_C_T	210577831	0	126	T	C	0.151	-0.1776733	0.08724155	0.0438578	0.04012977	0.04397938
1	1_210577901_T_C	210577901	0	126	C	T	0.151	-0.1776733	0.08724155	0.0438578	0.04012977	0.04397938
1	1_210591742_TG_T	210591742	0	126	T	TG	0.556	-0.1225566	0.05911653	0.04026472	0.0367403	0.04049694
1	1_212530659_CT_CTT	212530659	0	126	CTT	CT	0.087	-0.2399367	0.1163139	0.04125008	0.03766892	0.04145224
1	1_212911836_T_C	212911836	0	126	C	T	0.671	0.1304075	0.06765871	0.05625069	0.05188312	0.05597643
1	1_213009469_A_G	213009469	0	126	G	A	0.702	0.1508682	0.06721407	0.02659648	0.02394231	0.0272101
1	1_213186531_G_A	213186531	0	126	A	G	0.016	-0.5286169	0.2543821	0.03980238	0.03630484	0.04004863
1	1_214491536_G_C	214491536	0	126	C	G	0.282	-0.1579899	0.07764099	0.04403029	0.04029271	0.04414649
1	1_214500907_A_C	214500907	0	126	C	A	0.282	-0.1579899	0.07764099	0.04403029	0.04029271	0.04414649
1	1_214505596_C_T	214505596	0	126	T	C	0.286	0.1606329	0.07036428	0.02416874	0.02168851	0.02483913
1	1_214556810_C_T	214556810	0	126	T	C	0.012	0.5642466	0.2908428	0.05468243	0.05039094	0.054459
1	1_214837210_T_C	214837210	0	126	C	T	0.04	-0.4412159	0.1641483	0.008194551	0.007093433	0.009010185
1	1_215916713_C_CAT	215916713	0	126	CAT	C	0.286	-0.1177897	0.06005334	0.05210799	0.04794427	0.05196767
1	1_216390694_C_T	216390694	0	126	T	C	0.615	0.1158968	0.05909279	0.05212584	0.04796123	0.05198495
1	1_216595306_C_T	216595306	0	126	T	C	0.71	0.1292335	0.0655258	0.05084287	0.04674331	0.05074322
1	1_217688272_G_T	217688272	0	126	T	G	0.048	0.3043082	0.1506043	0.04551264	0.0416938	0.04558242
1	1_217784431_AC_A	217784431	0	126	A	AC	0.028	0.3973505	0.1943262	0.04302979	0.03934788	0.0431771
1	1_217856626_G_A	217856626	0	126	A	G	0.159	0.1934758	0.08872167	0.03112394	0.02816258	0.03162075
1	1_220161969_T_C	220161969	0	126	C	T	0.02	-0.4791023	0.22648	0.03642714	0.0331307	0.03677401
1	1_220191555_C_T	220191555	0	126	T	C	0.032	0.4235328	0.1806691	0.0206818	0.0184643	0.02142408
1	1_220193423_T_C	220193423	0	126	C	T	0.032	0.4396276	0.1799035	0.01596881	0.014135	0.01678304
1	1_220284112_GT_G	220284112	0	126	G	GT	0.024	0.5246836	0.2254201	0.0215818	0.01929492	0.02230678
1	1_220300035_T_C	220300035	0	126	C	T	0.06	-0.3015748	0.1365118	0.02903158	0.02620956	0.02958392
1	1_220307676_A_G	220307676	0	126	G	A	0.075	0.306447	0.1089784	0.005739028	0.004908502	0.006494121
1	1_220823951_T_A	220823951	0	126	A	T	0.012	0.6063056	0.2946108	0.04172118	0.03811313	0.04190889
1	1_221053545_T_C	221053545	0	126	C	T	0.238	-0.2011677	0.07308903	0.006820234	0.00586737	0.007607865
1	1_221054761_C_G	221054761	0	126	G	C	0.238	-0.2011677	0.07308903	0.006820234	0.00586737	0.007607865
1	1_223177974_G_A	223177974	0	126	A	G	0.024	-0.5003721	0.20591	0.01655263	0.01466926	0.01735996
1	1_223178477_C_T	223178477	0	126	T	C	0.024	-0.5003721	0.20591	0.01655263	0.01466926	0.01735996
1	1_223990623_G_A	223990623	0	126	A	G	0.056	-0.3214886	0.1294326	0.0143548	0.01266138	0.01518443
1	1_224377724_C_T	224377724	0	126	T	C	0.052	0.3493321	0.1456883	0.01800961	0.01600519	0.018797
1	1_224492746_C_T	224492746	0	126	T	C	0.956	-0.2955397	0.1531982	0.05603677	0.0516795	0.05576945
1	1_224495852_C_T	224495852	0	126	T	C	0.956	-0.2955397	0.1531982	0.05603677	0.0516795	0.05576945
1	1_224517842_C_T	224517842	0	126	T	C	0.956	-0.2955397	0.1531982	0.05603677	0.0516795	0.05576945
1	1_224544746_G_A	224544746	0	126	A	G	0.044	0.3055606	0.1582989	0.05589345	0.0515431	0.05563078
1	1_224577604_G_A	224577604	0	126	A	G	0.032	-0.3632828	0.1813044	0.04731573	0.04339997	0.0473286
1	1_224588833_G_GA	224588833	0	126	GA	G	0.032	0.4112826	0.1808568	0.0247087	0.02218917	0.02536688
1	1_225495168_G_A	225495168	0	126	A	G	0.048	0.4880712	0.1465577	0.001148217	0.0009294928	0.001539076
1	1_225510537_A_T	225510537	0	126	T	A	0.052	0.4286366	0.1306768	0.001352767	0.001101281	0.001777012
1	1_225519116_A_G	225519116	0	126	G	A	0.052	0.4286366	0.1306768	0.001352767	0.001101281	0.001777012
1	1_225521101_G_C	225521101	0	126	C	G	0.048	0.4880712	0.1465577	0.001148217	0.0009294928	0.001539076
1	1_225541666_T_G	225541666	0	126	G	T	0.052	0.4286366	0.1306768	0.001352767	0.001101281	0.001777012
1	1_225565073_C_T	225565073	0	126	T	C	0.619	-0.1459465	0.06546618	0.0276214	0.02489581	0.02820971
1	1_225577635_T_C	225577635	0	126	C	T	0.052	0.3243146	0.1457566	0.02791653	0.02517058	0.02849741
1	1_225577648_C_T	225577648	0	126	T	C	0.611	-0.1560022	0.0636739	0.01570399	0.01389287	0.01652113
1	1_225580093_G_C	225580093	0	126	C	G	0.048	0.3000373	0.1513279	0.04964827	0.04561012	0.04958688
1	1_225600169_C_T	225600169	0	126	T	C	0.048	0.3000373	0.1513279	0.04964827	0.04561012	0.04958688
1	1_225600383_A_G	225600383	0	126	G	A	0.048	0.3000373	0.1513279	0.04964827	0.04561012	0.04958688
1	1_225603103_C_T	225603103	0	126	T	C	0.865	-0.2276651	0.09536483	0.0185079	0.0164629	0.01928766
1	1_225605615_T_C	225605615	0	126	C	T	0.048	0.3000373	0.1513279	0.04964827	0.04561012	0.04958688
1	1_225609884_A_G	225609884	0	126	G	A	0.81	-0.2203353	0.08802146	0.01362948	0.01200087	0.01446405
1	1_226016633_G_A	226016633	0	126	A	G	0.099	-0.2108358	0.101782	0.0404251	0.0368914	0.04065244
1	1_226026616_G_A	226026616	0	126	A	G	0.087	-0.2080936	0.1056041	0.05104509	0.04693521	0.05093895
1	1_226923938_A_C	226923938	0	126	C	A	0.46	0.1363783	0.05842594	0.02121986	0.01896075	0.02195191
1	1_227149203_G_A	227149203	0	126	A	G	0.254	0.151346	0.07229349	0.03837615	0.03496251	0.03866532
1	1_227198775_C_G	227198775	0	126	G	C	0.25	0.1471488	0.07407018	0.04920643	0.04519122	0.04915916
1	1_227843003_G_A	227843003	0	126	A	G	0.016	-0.4989186	0.2523511	0.05028763	0.0462165	0.05020578
1	1_229601288_T_TATC	229601288	0	126	TATC	T	0.06	-0.3036848	0.136011	0.02738631	0.024677	0.02798049
1	1_230372025_A_G	230372025	0	126	G	A	0.04	0.3347101	0.1717353	0.05359209	0.04935428	0.05340392
1	1_230372061_A_G	230372061	0	126	G	A	0.131	-0.2149434	0.09645924	0.02769035	0.02495999	0.02827693
1	1_230398445_G_A	230398445	0	126	A	G	0.131	-0.2150182	0.09645205	0.02762591	0.02490001	0.02821411
1	1_230410374_G_A	230410374	0	126	A	G	0.04	0.3578385	0.1628585	0.02989245	0.02701257	0.03042223
1	1_230561389_C_A	230561389	0	126	A	C	0.06	0.2518603	0.1277899	0.05100011	0.04689252	0.05089541
1	1_230561627_G_C	230561627	0	126	C	G	0.06	0.2518603	0.1277899	0.05100011	0.04689252	0.05089541
1	1_230845794_A_G	230845794	0	126	G	A	0.433	-0.1389482	0.06358736	0.03078822	0.02784892	0.0312941
1	1_230898494_C_T	230898494	0	126	T	C	0.397	0.1897572	0.06211027	0.002763111	0.002305221	0.003349826
1	1_230903234_A_G	230903234	0	126	G	A	0.516	0.2023639	0.06392133	0.00195332	0.00161039	0.002458289
1	1_230903350_T_C	230903350	0	126	C	T	0.361	0.1944854	0.06478029	0.003251596	0.002727873	0.003877472
1	1_230904911_C_T	230904911	0	126	T	C	0.357	0.1942935	0.06340467	0.00268569	0.002238455	0.003265588
1	1_230914729_A_C	230914729	0	126	C	A	0.294	-0.1533505	0.06710242	0.02402057	0.02155118	0.02469425
1	1_230933898_C_T	230933898	0	126	T	C	0.274	0.2181503	0.06488328	0.001033256	0.0008333932	0.001403582
1	1_231003878_T_G	231003878	0	126	G	T	0.048	-0.4351064	0.1479549	0.003917688	0.003307608	0.004588019
1	1_231003891_A_C	231003891	0	126	C	A	0.02	-0.5085519	0.2260889	0.02628389	0.02365173	0.02690508
1	1_231175615_C_T	231175615	0	126	T	C	0.052	0.2958013	0.1341733	0.02935616	0.02651224	0.02990004
1	1_231321943_C_A	231321943	0	126	A	C	0.179	-0.2254362	0.0805932	0.00599148	0.005131889	0.006755144
1	1_231323339_A_G	231323339	0	126	G	A	0.147	-0.2676142	0.0920806	0.004344712	0.003681059	0.005039156
1	1_231334780_C_A	231334780	0	126	A	C	0.099	-0.2565697	0.1064608	0.01744608	0.01548805	0.01824161
1	1_231337031_C_A	231337031	0	126	A	C	0.147	-0.2543817	0.09284786	0.007071081	0.006090589	0.00786483
1	1_231396485_CA_C	231396485	0	126	C	CA	0.024	-0.5007784	0.2058916	0.01645757	0.01458223	0.01726606
1	1_232098859_C_G	232098859	0	126	G	C	0.25	0.1591929	0.07229173	0.02953899	0.02668278	0.03007809
1	1_232568041_G_A	232568041	0	126	A	G	0.107	-0.301484	0.09726357	0.002405997	0.001997809	0.00295966
1	1_232597919_C_T	232597919	0	126	T	C	0.127	-0.2323286	0.09031036	0.01129347	0.00988174	0.01213378
1	1_233122319_G_A	233122319	0	126	A	G	0.012	0.6056159	0.2946192	0.04195599	0.0383346	0.04213648
1	1_233398636_A_G	233398636	0	126	G	A	0.115	0.1875922	0.09324467	0.04644115	0.04257215	0.04648168
1	1_233489705_TTG_T	233489705	0	126	T	TTG	0.036	0.3340676	0.1716592	0.05394084	0.04968579	0.0537414
1	1_234452542_G_A	234452542	0	126	A	G	0.079	0.2378168	0.1140447	0.03912753	0.0356695	0.03939416
1	1_234601529_T_C	234601529	0	126	C	T	0.028	-0.4896115	0.1914958	0.01179092	0.01033189	0.01263146
1	1_234603205_C_T	234603205	0	126	T	C	0.028	-0.4896115	0.1914958	0.01179092	0.01033189	0.01263146
1	1_234603322_A_T	234603322	0	126	T	A	0.028	-0.4896115	0.1914958	0.01179092	0.01033189	0.01263146
1	1_234606998_A_G	234606998	0	126	G	A	0.04	-0.3997848	0.1622557	0.01513619	0.01337417	0.01595908
1	1_234613860_A_G	234613860	0	126	G	A	0.04	0.4508022	0.1612202	0.006009296	0.005147666	0.006773542
1	1_234614698_C_T	234614698	0	126	T	C	0.036	0.4420889	0.1706077	0.0107285	0.009371281	0.01156746
1	1_234614879_C_A	234614879	0	126	A	C	0.036	0.4420889	0.1706077	0.0107285	0.009371281	0.01156746
1	1_234744945_A_AGCT	234744945	0	126	AGCT	A	0.024	0.5507905	0.2048392	0.00817187	0.007073139	0.008987143
1	1_235621851_CA_CAA	235621851	0	126	CAA	CA	0.222	0.1706091	0.08656546	0.05100313	0.04689539	0.05089834
1	1_235860340_C_T	235860340	0	126	T	C	0.508	-0.1481474	0.06722722	0.02942393	0.02657545	0.02996604
1	1_235872665_T_C	235872665	0	126	C	T	0.409	-0.1393883	0.06987033	0.04827626	0.0443097	0.04825863
1	1_235910542_C_T	235910542	0	126	T	C	0.409	-0.1393883	0.06987033	0.04827626	0.0443097	0.04825863
1	1_235922228_T_C	235922228	0	126	C	T	0.274	-0.1620735	0.07533026	0.03340705	0.03029839	0.03384074
1	1_235940450_C_T	235940450	0	126	T	C	0.405	-0.1525121	0.07049738	0.03246229	0.029414	0.03292239
1	1_235945294_T_C	235945294	0	126	C	T	0.405	-0.1525121	0.07049738	0.03246229	0.029414	0.03292239
1	1_235971734_G_C	235971734	0	126	C	G	0.024	0.5454629	0.2061734	0.009227062	0.008019132	0.01005601
1	1_235972435_T_C	235972435	0	126	C	T	0.405	-0.1525121	0.07049738	0.03246229	0.029414	0.03292239
1	1_235972867_T_C	235972867	0	126	C	T	0.405	-0.1525121	0.07049738	0.03246229	0.029414	0.03292239
1	1_236175327_C_A	236175327	0	126	A	C	0.083	0.3124309	0.1106175	0.005534424	0.004727695	0.006282087
1	1_236180580_C_G	236180580	0	126	G	C	0.107	0.2563426	0.1033468	0.01448631	0.01278126	0.0153149
1	1_236187365_T_C	236187365	0	126	C	T	0.111	0.2421719	0.1009545	0.01796195	0.01596144	0.01875005
1	1_236368391_C_CT	236368391	0	126	CT	C	0.254	0.1705727	0.0674757	0.01275168	0.01120305	0.01359035
1	1_236413147_T_C	236413147	0	126	C	T	0.214	0.1844181	0.07068416	0.01021497	0.008908062	0.01105161
1	1_236413282_G_A	236413282	0	126	A	G	0.214	0.1844181	0.07068416	0.01021497	0.008908062	0.01105161
1	1_236415347_T_C	236415347	0	126	C	T	0.218	0.1800915	0.07044522	0.01180049	0.01034056	0.01264103
1	1_236415444_G_A	236415444	0	126	A	G	0.218	0.1800915	0.07044522	0.01180049	0.01034056	0.01264103
1	1_236444973_C_T	236444973	0	126	T	C	0.313	0.2416074	0.06684039	0.000438103	0.0003430157	0.0006699999
1	1_236590679_T_C	236590679	0	126	C	T	0.012	0.5652878	0.2908371	0.05423936	0.0499696	0.05403026
1	1_236645670_C_T	236645670	0	126	T	C	0.238	-0.200728	0.07122254	0.005634074	0.004815727	0.006385411
1	1_236744720_TAA_TA	236744720	0	126	TA	TAA	0.278	-0.1439101	0.07394009	0.0539168	0.04966294	0.05371814
1	1_236902865_A_C	236902865	0	126	C	A	0.635	0.1571458	0.06959017	0.02571267	0.02312102	0.0263475
1	1_236911122_C_T	236911122	0	126	T	C	0.028	-0.4997114	0.1905758	0.009851836	0.008580967	0.01068617
1	1_236924506_A_G	236924506	0	126	G	A	0.909	0.2184594	0.1102738	0.04983355	0.04578583	0.04976624
1	1_237796837_G_A	237796837	0	126	A	G	0.381	0.1433898	0.06398824	0.02684297	0.02417151	0.02745057
1	1_237797082_T_G	237797082	0	126	G	T	0.385	0.132548	0.06329892	0.03833006	0.03491915	0.0386206
1	1_237798342_G_A	237798342	0	126	A	G	0.143	0.2312387	0.09420833	0.01551699	0.01372197	0.0163361
1	1_237817514_GA_G	237817514	0	126	G	GA	0.278	0.2012069	0.0712979	0.005572863	0.004761646	0.006321956
1	1_237817784_A_G	237817784	0	126	G	A	0.226	0.1927341	0.07302783	0.009395003	0.008170035	0.01022558
1	1_238045995_T_C	238045995	0	126	C	T	0.202	0.1665163	0.07866741	0.03631571	0.03302606	0.03666584
1	1_238053132_A_C	238053132	0	126	C	A	0.016	0.552544	0.2511132	0.0296632	0.02679866	0.03019903
1	1_241846828_CTG_C	241846828	0	126	C	CTG	0.028	-0.4898157	0.2066549	0.01934549	0.01723318	0.02011158
1	1_242042454_C_T	242042454	0	126	T	C	0.016	-0.4994941	0.252329	0.05000739	0.04595069	0.04993451
1	1_242042690_A_G	242042690	0	126	G	A	0.821	0.2967224	0.08110017	0.0003755733	0.0002924877	0.0005878176
1	1_242264091_GA_GAA	242264091	0	126	GAA	GA	0.099	-0.2224386	0.1148511	0.05508726	0.05077601	0.05485072
1	1_242264102_A_G	242264102	0	126	G	A	0.254	0.1671995	0.07705236	0.03194886	0.02893372	0.03242314
1	1_243327520_A_T	243327520	0	126	T	A	0.337	-0.1574011	0.07019673	0.02674936	0.02408445	0.02735925
1	1_244641216_C_A	244641216	0	126	A	C	0.036	0.4411176	0.1706018	0.01089504	0.009521665	0.01173453
1	1_245005373_A_G	245005373	0	126	G	A	0.194	0.1579712	0.07913347	0.04813205	0.04417309	0.04811901
1	1_245005492_T_TG	245005492	0	126	TG	T	0.155	0.1835766	0.08701311	0.0369226	0.03359607	0.03725491
1	1_245008377_TTTG_T	245008377	0	126	T	TTTG	0.143	0.1724648	0.08901652	0.05500189	0.0506948	0.05476811
1	1_245025692_A_T	245025692	0	126	T	A	0.179	0.1695942	0.08238042	0.04165462	0.03805036	0.04184437
1	1_245133549_GGC_G	245133549	0	126	G	GGC	0.175	-0.1212196	0.06289404	0.05625921	0.05189124	0.05598468
1	1_245848996_G_A	245848996	0	126	A	G	0.048	-0.4352548	0.1479448	0.003903517	0.003295238	0.004572994
1	1_245849993_C_T	245849993	0	126	T	C	0.052	0.2435023	0.1204464	0.04539881	0.04158616	0.04547217
1	1_245850296_C_T	245850296	0	126	T	C	0.016	0.5535676	0.2511066	0.02936395	0.0265195	0.02990763
1	1_245850506_G_C	245850506	0	126	C	G	0.012	0.5656605	0.2908357	0.05408199	0.04981998	0.05387798
1	1_245913024_C_T	245913024	0	126	T	C	0.028	0.5543131	0.1897513	0.004154592	0.003514631	0.004838678
1	1_246670298_CCTCCCCAGCA_CCCCCAGCA	246670298	0	126	CCCCCAGCA	CCTCCCCAGCA	0.333	-0.1303648	0.06484752	0.04660191	0.04272428	0.04663737
1	1_247109168_G_A	247109168	0	126	A	G	0.365	-0.1341227	0.06261759	0.03418644	0.03102857	0.03459805
1	1_247729206_CTT_C	247729206	0	126	C	CTT	0.056	-0.2825011	0.1408712	0.04713474	0.04322861	0.04715334
1	1_248084471_A_G	248084471	0	126	G	A	0.123	-0.2070857	0.09454876	0.03040735	0.02749323	0.03092345
1	1_248084473_C_A	248084473	0	126	A	C	0.119	-0.2078375	0.09936627	0.03854578	0.03512207	0.03882987
1	1_248085123_C_T	248085123	0	126	T	C	0.02	-0.5093303	0.226053	0.0260363	0.02342165	0.02666343
1	1_248085171_C_T	248085171	0	126	T	C	0.02	-0.5093303	0.226053	0.0260363	0.02342165	0.02666343
1	1_248112738_C_A	248112738	0	126	A	C	0.036	-0.3847145	0.1707914	0.02607556	0.02345813	0.02670175
1	1_248113061_C_A	248113061	0	126	A	C	0.036	-0.3847145	0.1707914	0.02607556	0.02345813	0.02670175
1	1_248128722_T_C	248128722	0	126	C	T	0.036	-0.3847145	0.1707914	0.02607556	0.02345813	0.02670175
1	1_248129486_C_T	248129486	0	126	T	C	0.036	-0.3847145	0.1707914	0.02607556	0.02345813	0.02670175
1	1_248366370_A_G	248366370	0	126	G	A	0.016	0.5550134	0.2511019	0.02894863	0.02613223	0.02950312
1	1_248403015_C_A	248403015	0	126	A	C	0.016	0.5811215	0.2525732	0.02310026	0.02069883	0.023794
1	1_248436425_G_C	248436425	0	126	C	G	0.016	-0.4995806	0.2523258	0.04996548	0.04591095	0.04989395
1	1_248551146_C_G	248551146	0	126	G	C	0.016	-0.4847626	0.2522401	0.05695923	0.05255771	0.05666197
1	1_248617050_G_A	248617050	0	126	A	G	0.135	0.2462613	0.1036859	0.0191041	0.01701107	0.01987423
1	1_248617051_C_T	248617051	0	126	T	C	0.151	0.2290981	0.0994712	0.02296299	0.0205718	0.02365966
1	1_248813785_A_T	248813785	0	126	T	A	0.103	0.2253063	0.1092882	0.04137182	0.03778369	0.04157025
2	2_224919_A_G	224919	0	126	G	A	0.333	0.1728547	0.06561856	0.009525466	0.008287324	0.01035722
2	2_234130_T_G	234130	0	126	G	T	0.393	-0.1619182	0.06440827	0.01324173	0.01164824	0.01407838
2	2_242793_G_C	242793	0	126	C	G	0.226	0.1618718	0.0704844	0.02334925	0.02092933	0.02403765
2	2_242800_T_C	242800	0	126	C	T	0.456	-0.1651352	0.06282067	0.009673905	0.008420837	0.01050689
2	2_243504_C_T	243504	0	126	T	C	0.393	-0.1619182	0.06440827	0.01324173	0.01164824	0.01407838
2	2_264019_C_A	264019	0	126	A	C	0.333	0.1792601	0.06676066	0.008259487	0.007151542	0.009076135
2	2_269352_G_A	269352	0	126	A	G	0.389	-0.1520065	0.06431598	0.01968674	0.01754731	0.02044697
2	2_271797_G_A	271797	0	126	A	G	0.341	0.1943789	0.06554257	0.003634014	0.003060269	0.004286525
2	2_272203_C_T	272203	0	126	T	C	0.337	0.1831022	0.06563652	0.006124633	0.005249839	0.006892565
2	2_276942_A_G	276942	0	126	G	A	0.389	-0.1697674	0.06385331	0.008896142	0.007722053	0.009721452
2	2_277003_A_G	277003	0	126	G	A	0.337	0.1831022	0.06563652	0.006124633	0.005249839	0.006892565
2	2_1079130_G_A	1079130	0	126	A	G	0.615	-0.1493071	0.06183897	0.01724395	0.01530269	0.01804227
2	2_1079132_G_A	1079132	0	126	A	G	0.615	-0.1493071	0.06183897	0.01724395	0.01530269	0.01804227
2	2_1204796_C_T	1204796	0	126	T	C	0.079	0.3485507	0.1149572	0.002967843	0.002482078	0.003571745
2	2_1460004_G_T	1460004	0	126	T	G	0.397	0.1340437	0.0688044	0.05368923	0.0494466	0.05349791
2	2_1481231_G_C	1481231	0	126	C	G	0.615	-0.1471811	0.07012567	0.03789486	0.03450988	0.03819838
2	2_1667310_G_A	1667310	0	126	A	G	0.694	-0.1368466	0.06531055	0.03821039	0.0348066	0.03850451
2	2_1683923_G_T	1683923	0	126	T	G	0.183	0.2080749	0.08082548	0.01123748	0.009831121	0.01207772
2	2_1812792_C_T	1812792	0	126	T	C	0.095	-0.2286852	0.1124192	0.04409765	0.04035635	0.04421175
2	2_3391826_C_T	3391826	0	126	T	C	0.202	0.23116	0.07868686	0.00395423	0.003339514	0.004626747
2	2_3469463_G_C	3469463	0	126	C	G	0.333	0.1602811	0.07495319	0.03447678	0.03130072	0.03488011
2	2_3470124_G_A	3470124	0	126	A	G	0.337	0.1716328	0.07509186	0.0240013	0.02153332	0.02467542
2	2_3470186_G_C	3470186	0	126	C	G	0.325	0.1831936	0.07550098	0.01671335	0.01481645	0.01751866
2	2_3815532_AT_ATT	3815532	0	126	ATT	AT	0.548	0.177213	0.07725623	0.02351064	0.02107877	0.02419554
2	2_6990020_C_T	6990020	0	126	T	C	0.099	0.2154042	0.1110234	0.05466647	0.05037577	0.05444356
2	2_7170388_CTGTGTGTGTGTG_C	7170388	0	126	C	CTGTGTGTGTGTG	0.071	-0.2318442	0.1123908	0.04125	0.03766884	0.04145216
2	2_8822912_A_C	8822912	0	126	C	A	0.639	-0.2295125	0.08956396	0.01160651	0.01016494	0.01244707
2	2_9419415_C_T	9419415	0	126	T	C	0.603	0.1234085	0.06284741	0.05184876	0.04769812	0.05171679
2	2_9463454_C_T	9463454	0	126	T	C	0.615	0.1308283	0.06155187	0.03556147	0.03231806	0.03593356
2	2_9475337_A_G	9475337	0	126	G	A	0.302	-0.1593986	0.06451577	0.01486625	0.01312778	0.01569162
2	2_9727657_C_T	9727657	0	126	T	C	0.107	-0.2226981	0.1076167	0.04062328	0.03707813	0.04084459
2	2_10915090_T_A	10915090	0	126	A	T	0.282	0.1263788	0.0624729	0.04526543	0.04146004	0.04534298
2	2_11273458_A_AC	11273458	0	126	AC	A	0.028	0.4026986	0.1809302	0.02787034	0.02512757	0.02845239
2	2_11273757_C_T	11273757	0	126	T	C	0.028	0.4026986	0.1809302	0.02787034	0.02512757	0.02845239
2	2_11284025_C_T	11284025	0	126	T	C	0.028	0.4026986	0.1809302	0.02787034	0.02512757	0.02845239
2	2_11312224_C_T	11312224	0	126	T	C	0.552	0.1154878	0.05827666	0.04975948	0.04571558	0.04969453
2	2_11333994_T_G	11333994	0	126	G	T	0.25	-0.1821062	0.06453979	0.00558017	0.004768101	0.006329533
2	2_11348364_C_CTAACT	11348364	0	126	CTAACT	C	0.52	0.1165355	0.05855546	0.0488078	0.04481337	0.04877323
2	2_11359120_G_T	11359120	0	126	T	G	0.532	0.1280358	0.05898442	0.03189265	0.02888115	0.03236848
2	2_11728854_G_A	11728854	0	126	A	G	0.111	0.2616216	0.106433	0.0153721	0.0135896	0.01619268
2	2_11733134_C_G	11733134	0	126	G	C	0.012	0.563989	0.2908446	0.05479285	0.05049597	0.05456585
2	2_11758536_C_A	11758536	0	126	A	C	0.032	0.4208121	0.1822182	0.02260368	0.02023938	0.02330791
2	2_17899342_A_T	17899342	0	126	T	A	0.056	0.2827059	0.1408489	0.04694319	0.04304729	0.04696786
2	2_18112458_T_C	18112458	0	126	C	T	0.016	0.5332278	0.2519412	0.03633614	0.03304524	0.03668567
2	2_18765169_C_T	18765169	0	126	T	C	0.02	0.5506548	0.22438	0.01553459	0.01373805	0.01635351
2	2_18765181_A_G	18765181	0	126	G	A	0.04	0.2936103	0.1481163	0.04969378	0.04565327	0.04963093
2	2_18766156_G_T	18766156	0	126	T	G	0.036	0.3339065	0.171658	0.05405334	0.04979274	0.05385026
2	2_18767451_A_G	18767451	0	126	G	A	0.04	0.2936103	0.1481163	0.04969378	0.04565327	0.04963093
2	2_20404123_T_G	20404123	0	126	G	T	0.016	-0.4997158	0.2523208	0.04990006	0.0458489	0.04983062
2	2_20701120_C_G	20701120	0	126	G	C	0.079	-0.2680832	0.1206479	0.02812496	0.0253647	0.02870057
2	2_20824498_C_T	20824498	0	126	T	C	0.548	0.1231056	0.06135914	0.0470345	0.04313373	0.04705628
2	2_20824708_T_C	20824708	0	126	C	T	0.333	-0.1508164	0.06368678	0.0194514	0.01733066	0.0202157
2	2_20838318_G_A	20838318	0	126	A	G	0.274	-0.1350814	0.06701305	0.04602344	0.04217694	0.04607715
2	2_20884586_G_C	20884586	0	126	C	G	0.214	0.1958451	0.07700447	0.01223125	0.01073088	0.01307129
2	2_20939706_T_C	20939706	0	126	C	T	0.274	0.1970421	0.07285398	0.007816098	0.006755071	0.008625301
2	2_21225281_C_T	21225281	0	126	T	C	0.79	0.2028402	0.07210053	0.005717336	0.004889323	0.006471663
2	2_21231524_G_A	21231524	0	126	A	G	0.21	-0.2028402	0.07210053	0.005717336	0.004889323	0.006471663
2	2_21249716_C_T	21249716	0	126	T	C	0.036	0.3333103	0.1716544	0.05447245	0.05019125	0.05425581
2	2_21364562_C_T	21364562	0	126	T	C	0.056	0.2911221	0.1414114	0.04165289	0.03804873	0.04184269
2	2_24245957_G_T	24245957	0	126	T	G	0.012	0.564574	0.2908407	0.05454257	0.05025793	0.05432366
2	2_24300428_C_G	24300428	0	126	G	C	0.032	-0.3839255	0.1813833	0.03632089	0.03303093	0.03667087
2	2_24400744_G_A	24400744	0	126	A	G	0.028	0.4021016	0.192863	0.03916315	0.03570302	0.03942871
2	2_24522800_C_T	24522800	0	126	T	C	0.012	0.564574	0.2908407	0.05454257	0.05025793	0.05432366
2	2_25022598_A_G	25022598	0	126	G	A	0.099	-0.2664287	0.1047829	0.01225186	0.01074957	0.01309187
2	2_25059745_T_G	25059745	0	126	G	T	0.067	-0.2649485	0.1298782	0.04351164	0.03980284	0.04364399
2	2_25065274_T_G	25065274	0	126	G	T	0.067	-0.2649485	0.1298782	0.04351164	0.03980284	0.04364399
2	2_25360186_C_T	25360186	0	126	T	C	0.036	0.4179716	0.184231	0.02504174	0.02249816	0.02569227
2	2_25376681_G_A	25376681	0	126	A	G	0.036	0.4179716	0.184231	0.02504174	0.02249816	0.02569227
2	2_25705798_G_C	25705798	0	126	C	G	0.016	0.5374718	0.2516944	0.03472626	0.03153462	0.03512245
2	2_26437255_G_C	26437255	0	126	C	G	0.02	0.569455	0.2247595	0.01255633	0.01102574	0.01339562
2	2_26672789_G_C	26672789	0	126	C	G	0.016	-0.5001517	0.2523053	0.04969015	0.04564983	0.04962742
2	2_26696374_C_T	26696374	0	126	T	C	0.016	0.5371197	0.2516941	0.03484281	0.03164391	0.03523565
2	2_26739526_A_G	26739526	0	126	G	A	0.083	-0.2335445	0.1068275	0.03071109	0.02777688	0.03121904
2	2_26804247_T_C	26804247	0	126	C	T	0.504	-0.1290676	0.06243907	0.04084014	0.0372825	0.04105484
2	2_27015301_C_T	27015301	0	126	T	C	0.04	0.3783977	0.1636222	0.0224184	0.02006804	0.02312648
2	2_27246285_C_T	27246285	0	126	T	C	0.933	-0.2857473	0.1302314	0.03011898	0.02722401	0.03064276
2	2_27279013_A_G	27279013	0	126	G	A	0.067	0.2920773	0.1301544	0.0266301	0.02397356	0.0272429
2	2_27292621_CCT_C	27292621	0	126	C	CCT	0.016	-0.5275125	0.2544293	0.04024758	0.03672415	0.04048032
2	2_27308159_G_A	27308159	0	126	A	G	0.032	0.4295409	0.1799061	0.01849461	0.01645069	0.01927458
2	2_27424636_G_A	27424636	0	126	A	G	0.726	0.1541813	0.07382713	0.03884049	0.03539936	0.03911575
2	2_27435374_G_A	27435374	0	126	A	G	0.734	0.1692899	0.07721156	0.03023747	0.02733461	0.03075809
2	2_27445315_G_GT	27445315	0	126	GT	G	0.218	-0.1681153	0.07743917	0.03187243	0.02886224	0.03234881
2	2_27460968_A_G	27460968	0	126	G	A	0.266	-0.1692899	0.07721156	0.03023747	0.02733461	0.03075809
2	2_27462076_C_T	27462076	0	126	T	C	0.222	-0.155331	0.07754286	0.04737611	0.04345714	0.04738706
2	2_27462405_T_A	27462405	0	126	A	T	0.27	-0.1699524	0.07699578	0.02916398	0.02633301	0.02971288
2	2_27463510_T_C	27463510	0	126	C	T	0.016	0.5814325	0.252571	0.02302727	0.02063128	0.02372257
2	2_27465608_G_C	27465608	0	126	C	G	0.016	0.5374667	0.2516944	0.03472795	0.0315362	0.03512408
2	2_27505782_C_T	27505782	0	126	T	C	0.19	-0.1914187	0.07821846	0.01582002	0.01399894	0.0166359
2	2_27528692_T_C	27528692	0	126	C	T	0.246	-0.2036212	0.0766967	0.008991846	0.007807933	0.009818266
2	2_27532870_A_G	27532870	0	126	G	A	0.19	-0.1914187	0.07821846	0.01582002	0.01399894	0.0166359
2	2_27857661_C_G	27857661	0	126	G	C	0.012	0.5656852	0.2908356	0.05407156	0.04981006	0.05386788
2	2_27887160_C_T	27887160	0	126	T	C	0.02	0.5696186	0.2247587	0.0125313	0.01100303	0.01337065
2	2_27994597_G_T	27994597	0	126	T	G	0.036	-0.3175625	0.1539741	0.04128841	0.03770505	0.04148939
2	2_28464290_C_T	28464290	0	126	T	C	0.032	-0.4969846	0.1786908	0.006275214	0.005383331	0.007047772
2	2_28748838_T_C	28748838	0	126	C	T	0.056	-0.2796147	0.1416169	0.05059032	0.04650367	0.05049877
2	2_28854972_C_A	28854972	0	126	A	C	0.02	-0.4799811	0.2264507	0.03606771	0.03279322	0.03642509
2	2_29268288_CAG_C	29268288	0	126	C	CAG	0.06	0.3044689	0.1364181	0.02744838	0.02473476	0.02804101
2	2_29356669_A_G	29356669	0	126	G	A	0.393	-0.194085	0.06794297	0.005035491	0.004287741	0.005763057
2	2_29356728_T_C	29356728	0	126	C	T	0.179	-0.1812835	0.08386588	0.0326028	0.02954548	0.03305899
2	2_29451793_A_C	29451793	0	126	C	A	0.024	0.4058024	0.2089966	0.05448249	0.0502008	0.05426553
2	2_29462520_G_A	29462520	0	126	A	G	0.099	0.2545742	0.1009671	0.0129794	0.01140985	0.01381721
2	2_30682630_T_A	30682630	0	126	A	T	0.23	0.1425332	0.07398381	0.0563621	0.05198918	0.05608423
2	2_30862980_C_T	30862980	0	126	T	C	0.123	0.1925788	0.094699	0.0441622	0.04041733	0.04427429
2	2_30863092_C_T	30863092	0	126	T	C	0.123	0.1925788	0.094699	0.0441622	0.04041733	0.04427429
2	2_30863108_A_G	30863108	0	126	G	A	0.123	0.1925788	0.094699	0.0441622	0.04041733	0.04427429
2	2_31489627_TACACACAC_TACACAC	31489627	0	126	TACACAC	TACACACAC	0.206	-0.1939942	0.0906888	0.03441853	0.03124611	0.03482352
2	2_32661267_T_G	32661267	0	126	G	T	0.016	0.5290509	0.2543899	0.03964865	0.03616008	0.03989956
2	2_32661310_G_A	32661310	0	126	A	G	0.016	0.5290509	0.2543899	0.03964865	0.03616008	0.03989956
2	2_32800422_C_G	32800422	0	126	G	C	0.127	-0.2014128	0.09475389	0.03554919	0.03230654	0.03592164
2	2_32865434_G_A	32865434	0	126	A	G	0.032	0.4397671	0.1799034	0.01593611	0.01410509	0.0167507
2	2_33007817_T_C	33007817	0	126	C	T	0.032	-0.3634343	0.1812981	0.04721754	0.043307	0.04723352
2	2_33150469_C_T	33150469	0	126	T	C	0.02	-0.4917977	0.225485	0.03109661	0.02813704	0.03159416
2	2_33526748_C_T	33526748	0	126	T	C	0.012	0.563718	0.2908467	0.05490938	0.0506068	0.0546786
2	2_33568055_C_T	33568055	0	126	T	C	0.016	0.5802793	0.2525805	0.02329967	0.02088343	0.02398914
2	2_33744958_C_T	33744958	0	126	T	C	0.627	-0.1402113	0.06646289	0.03693492	0.03360765	0.03726687
2	2_33784161_G_A	33784161	0	126	A	G	0.385	-0.175705	0.07234432	0.01661011	0.0147219	0.01741672
2	2_36668395_T_A	36668395	0	126	A	T	0.131	0.2009702	0.0846276	0.01911942	0.01702517	0.0198893
2	2_37078095_A_AT	37078095	0	126	AT	A	0.484	-0.2013248	0.09742739	0.04090612	0.03734468	0.0411188
2	2_37277041_A_AT	37277041	0	126	AT	A	0.02	0.550391	0.2243808	0.01558337	0.01378263	0.01640179
2	2_37447473_T_A	37447473	0	126	A	T	0.833	0.1673402	0.08535774	0.05222146	0.04805203	0.05207749
2	2_39043360_AT_A	39043360	0	126	A	AT	0.282	-0.1733137	0.08992862	0.05627506	0.05190633	0.05600001
2	2_39046321_CT_C	39046321	0	126	C	CT	0.091	-0.2631553	0.1136797	0.02229051	0.01994979	0.02300122
2	2_39164452_C_G	39164452	0	126	G	C	0.016	-0.4994415	0.252331	0.05003289	0.04597488	0.04995919
2	2_39993167_T_C	39993167	0	126	C	T	0.401	-0.1438041	0.06488466	0.02852491	0.0257373	0.02909032
2	2_40006430_A_C	40006430	0	126	C	A	0.405	-0.1625023	0.06452852	0.01308684	0.01150747	0.0139242
2	2_40006442_C_T	40006442	0	126	T	C	0.405	-0.1716413	0.06472022	0.009063521	0.00787227	0.00989074
2	2_42181169_T_A	42181169	0	126	A	T	0.032	-0.3720899	0.1809526	0.04188792	0.0382704	0.0420705
2	2_42181226_C_A	42181226	0	126	A	C	0.036	-0.3785024	0.1803635	0.03791878	0.03453237	0.03822159
2	2_42280341_A_C	42280341	0	126	C	A	0.06	0.2905153	0.1369	0.03585164	0.03259039	0.03621531
2	2_42562821_A_C	42562821	0	126	C	A	0.571	0.1401963	0.06116474	0.02361309	0.02117366	0.02429575
2	2_43451998_G_A	43451998	0	126	A	G	0.02	-0.4735258	0.2289966	0.04076996	0.03721636	0.0409868
2	2_43514036_G_A	43514036	0	126	A	G	0.393	-0.130146	0.06606693	0.0511142	0.0470008	0.05100584
2	2_43514226_G_A	43514226	0	126	A	G	0.048	-0.4237628	0.1522503	0.006237609	0.005349984	0.007009032
2	2_43793963_TA_TAA	43793963	0	126	TAA	TA	0.103	-0.2339675	0.1038705	0.02607878	0.02346113	0.0267049
2	2_43903354_T_C	43903354	0	126	C	T	0.667	0.1224141	0.0634388	0.05597301	0.05161882	0.05570776
2	2_43926943_T_A	43926943	0	126	A	T	0.508	0.1312716	0.0626129	0.03809853	0.0347014	0.03839599
2	2_43931055_CTTTTTTT_CT	43931055	4	122	CT	CTTTTTTT	0.074	0.2188998	0.107981	0.04482054	0.04103946	0.04491204
2	2_43931176_T_C	43931176	0	126	C	T	0.5	0.1309487	0.06246474	0.03811627	0.03471808	0.0384132
2	2_44079606_G_A	44079606	0	126	A	G	0.04	0.3574254	0.1628553	0.0300755	0.02718342	0.03060043
2	2_44079671_C_T	44079671	0	126	T	C	0.04	0.3574254	0.1628553	0.0300755	0.02718342	0.03060043
2	2_44099057_A_G	44099057	0	126	G	A	0.04	0.3572458	0.1628541	0.03015556	0.02725815	0.03067836
2	2_44117563_A_C	44117563	0	126	C	A	0.099	0.2133994	0.1013428	0.0372791	0.03393105	0.03760089
2	2_44123758_G_A	44123758	0	126	A	G	0.103	0.2100297	0.1012152	0.04008097	0.03656721	0.04031877
2	2_44123759_G_A	44123759	0	126	A	G	0.119	-0.2259837	0.08959448	0.01294666	0.01138012	0.01378461
2	2_44152995_C_G	44152995	0	126	G	C	0.099	0.2133994	0.1013428	0.0372791	0.03393105	0.03760089
2	2_44187652_A_G	44187652	0	126	G	A	0.099	0.2133994	0.1013428	0.0372791	0.03393105	0.03760089
2	2_44222881_C_A	44222881	0	126	A	C	0.099	0.2133994	0.1013428	0.0372791	0.03393105	0.03760089
2	2_45640334_T_C	45640334	0	126	C	T	0.091	0.2417904	0.109354	0.028894	0.02608129	0.0294499
2	2_45879236_G_C	45879236	0	126	C	G	0.016	-0.4852989	0.2522317	0.0566812	0.05229298	0.05639297
2	2_46987338_C_T	46987338	0	126	T	C	0.052	0.3031974	0.1347708	0.02625893	0.02362853	0.02688072
2	2_46987341_C_T	46987341	0	126	T	C	0.052	0.3031974	0.1347708	0.02625893	0.02362853	0.02688072
2	2_47278823_C_T	47278823	0	126	T	C	0.234	0.1375037	0.07096337	0.05497416	0.05066842	0.05474128
2	2_47635523_CT_C	47635523	0	126	C	CT	0.143	-0.1906291	0.0980838	0.05425461	0.0499841	0.05404502
2	2_48741796_A_G	48741796	0	126	G	A	0.02	0.540635	0.2254652	0.01800685	0.01600266	0.01879428
2	2_54146387_GA_G	54146387	0	126	G	GA	0.107	-0.2570518	0.1102681	0.02138606	0.01911418	0.02211488
2	2_54200994_G_A	54200994	0	126	A	G	0.421	0.3586551	0.08890638	9.597169e-05	7.126257e-05	0.0001889142
2	2_54200996_G_A	54200996	0	126	A	G	0.115	0.2886822	0.0911437	0.001944028	0.001602467	0.002447904
2	2_55122589_A_G	55122589	0	126	G	A	0.46	-0.1275216	0.05979835	0.03496757	0.03176091	0.03535682
2	2_55155672_A_G	55155672	0	126	G	A	0.429	-0.142951	0.06348134	0.02611986	0.0234993	0.026745
2	2_55191321_G_A	55191321	0	126	A	G	0.016	0.5811423	0.2525731	0.02309537	0.02069431	0.02378922
2	2_55576585_A_C	55576585	0	126	C	A	0.012	0.5784529	0.2963086	0.05320552	0.04898688	0.05302982
2	2_55765882_CT_C	55765882	0	126	C	CT	0.258	-0.21331	0.08791741	0.01671858	0.01482124	0.01752382
2	2_56102061_GA_G	56102061	0	126	G	GA	0.131	-0.189025	0.09803334	0.05615764	0.05179455	0.0558864
2	2_59241436_A_G	59241436	0	126	G	A	0.468	0.1241565	0.06149527	0.04568336	0.04185526	0.04574777
2	2_60768978_G_A	60768978	0	126	A	G	0.615	-0.1236178	0.06403586	0.05587223	0.0515229	0.05561025
2	2_61308569_AT_A	61308569	0	126	A	AT	0.262	-0.2595127	0.08727331	0.003548268	0.002985632	0.004195081
2	2_61455771_T_A	61455771	0	126	A	T	0.067	0.272487	0.1290801	0.03681427	0.03349431	0.03714977
2	2_61577667_GA_G	61577667	0	126	G	GA	0.087	-0.244483	0.1163234	0.03763205	0.0342628	0.03794339
2	2_62069358_T_C	62069358	0	126	C	T	0.19	-0.1646511	0.07898771	0.0391995	0.03573723	0.03946396
2	2_62069528_C_T	62069528	0	126	T	C	0.242	-0.161142	0.07728523	0.03915191	0.03569243	0.0394178
2	2_62105986_C_T	62105986	0	126	T	C	0.063	-0.2821962	0.1235173	0.02405988	0.02158761	0.02473269
2	2_64780144_A_G	64780144	0	126	G	A	0.044	-0.3442865	0.1418648	0.01669183	0.01479674	0.01749741
2	2_65216886_G_C	65216886	0	126	C	G	0.048	0.3015576	0.1503813	0.04714553	0.04323883	0.04716379
2	2_65561392_C_T	65561392	0	126	T	C	0.262	0.1358006	0.06524051	0.03947589	0.03599741	0.03973201
2	2_68274510_CA_C	68274510	0	126	C	CA	0.063	-0.3257654	0.1318521	0.01486636	0.01312789	0.01569174
2	2_68729992_A_G	68729992	0	126	G	A	0.056	-0.2843104	0.1407871	0.04563326	0.04180787	0.04569925
2	2_69040500_G_A	69040500	0	126	A	G	0.175	-0.1542589	0.0781592	0.05068181	0.04659048	0.05058733
2	2_69043266_T_A	69043266	0	126	A	T	0.556	-0.1428986	0.07153799	0.04799352	0.04404185	0.04798487
2	2_69043539_G_C	69043539	0	126	C	G	0.71	0.13392	0.06697143	0.04775877	0.04381951	0.04775759
2	2_69093312_A_G	69093312	0	126	G	A	0.056	-0.4632369	0.1371135	0.0009788795	0.0007880626	0.001338979
2	2_69409029_C_A	69409029	0	126	A	C	0.488	-0.1393079	0.06643715	0.0380734	0.03467776	0.0383716
2	2_69420596_TAC_CAC	69420596	0	126	CAC	TAC	0.448	-0.1469817	0.06393356	0.02320733	0.02079794	0.02389879
2	2_69650730_G_A	69650730	0	126	A	G	0.04	0.3457643	0.1659845	0.03932951	0.03585961	0.03959005
2	2_69741609_C_T	69741609	0	126	T	C	0.389	-0.1304008	0.0616186	0.03635519	0.03306313	0.03670416
2	2_69741753_CTGT_C	69741753	0	126	C	CTGT	0.389	-0.1304008	0.0616186	0.03635519	0.03306313	0.03670416
2	2_70043387_C_T	70043387	0	126	T	C	0.012	0.5788582	0.2962548	0.05299901	0.04879066	0.05282998
2	2_70068014_G_T	70068014	0	126	T	G	0.071	-0.3231499	0.1276708	0.01264165	0.01110317	0.01348068
2	2_70121197_T_C	70121197	0	126	C	T	0.242	-0.1613	0.0751013	0.03370977	0.03058193	0.03413492
2	2_70906115_C_A	70906115	0	126	A	C	0.274	0.1584811	0.07546562	0.03778498	0.03440657	0.03809177
2	2_71058184_C_T	71058184	0	126	T	C	0.27	0.1539098	0.06789487	0.02515813	0.02260617	0.02580596
2	2_71058226_C_T	71058226	0	126	T	C	0.29	-0.1624147	0.06994222	0.02188377	0.01957387	0.02260273
2	2_71058230_T_A	71058230	0	126	A	T	0.067	-0.2830142	0.1289019	0.030014	0.02712602	0.03054057
2	2_71058306_T_C	71058306	0	126	C	T	0.067	-0.2830142	0.1289019	0.030014	0.02712602	0.03054057
2	2_71058795_G_A	71058795	0	126	A	G	0.067	-0.2830142	0.1289019	0.030014	0.02712602	0.03054057
2	2_71058811_C_G	71058811	0	126	G	C	0.067	-0.2830142	0.1289019	0.030014	0.02712602	0.03054057
2	2_71058906_G_T	71058906	0	126	T	G	0.067	-0.2830142	0.1289019	0.030014	0.02712602	0.03054057
2	2_71060936_G_C	71060936	0	126	C	G	0.306	0.1493454	0.06394795	0.02115416	0.01890011	0.02188748
2	2_71061051_C_T	71061051	0	126	T	C	0.067	-0.2830142	0.1289019	0.030014	0.02712602	0.03054057
2	2_71061108_G_A	71061108	0	126	A	G	0.254	-0.1898665	0.07170781	0.009172384	0.007970021	0.01000077
2	2_71062648_G_A	71062648	0	126	A	G	0.393	0.209035	0.06560774	0.001831141	0.001506319	0.002321391
2	2_71163173_C_T	71163173	0	126	T	C	0.175	-0.1761052	0.07950145	0.02860817	0.02581489	0.02917144
2	2_71417134_C_T	71417134	0	126	T	C	0.266	-0.1950422	0.07300168	0.008576381	0.007435337	0.009397625
2	2_71780877_A_AG	71780877	0	126	AG	A	0.067	-0.2679099	0.1293486	0.04044619	0.03691127	0.04067289
2	2_72958333_T_C	72958333	0	126	C	T	0.115	-0.1880419	0.094751	0.04943428	0.04540723	0.04937973
2	2_73285752_T_A	73285752	0	126	A	T	0.258	-0.1622741	0.0718623	0.02571489	0.02312308	0.02634967
2	2_73302891_G_GGCCT	73302891	0	126	GGCCT	G	0.258	-0.1622741	0.0718623	0.02571489	0.02312308	0.02634967
2	2_73316540_A_T	73316540	0	126	T	A	0.254	-0.172767	0.07162604	0.01735162	0.01540142	0.01814846
2	2_74128660_TGTGTGTGTGTGTGTGTGTGTGTGTG_TTGTGTGTGTGTGTGTGTGTGTGTG	74128660	0	126	TTGTGTGTGTGTGTGTGTGTGTGTG	TGTGTGTGTGTGTGTGTGTGTGTGTG	0.187	0.1661681	0.0732711	0.0250972	0.02254963	0.02574645
2	2_74460685_C_T	74460685	0	126	T	C	0.02	-0.4903236	0.2507281	0.05279839	0.04860005	0.05263582
2	2_74477427_G_A	74477427	0	126	A	G	0.02	-0.4903236	0.2507281	0.05279839	0.04860005	0.05263582
2	2_74763805_T_C	74763805	0	126	C	T	0.02	-0.5098473	0.2260308	0.02587395	0.02327082	0.02650495
2	2_79350347_A_G	79350347	0	126	G	A	0.94	0.298439	0.1387201	0.03341762	0.03030829	0.03385101
2	2_84756035_G_A	84756035	0	126	A	G	0.028	0.4016195	0.19286	0.03939185	0.0359183	0.03965051
2	2_85554433_C_T	85554433	0	126	T	C	0.024	0.4060988	0.2089965	0.05430886	0.05003569	0.05409752
2	2_85662017_G_A	85662017	0	126	A	G	0.524	-0.1658325	0.06412339	0.01088035	0.009508395	0.01171979
2	2_85662650_A_G	85662650	0	126	G	A	0.623	-0.1528783	0.06581429	0.02184219	0.01953545	0.02256199
2	2_85786074_G_A	85786074	0	126	A	G	0.016	-0.5273173	0.2544381	0.0403271	0.03679907	0.04055743
2	2_85806332_G_C	85806332	0	126	C	G	0.016	-0.5273173	0.2544381	0.0403271	0.03679907	0.04055743
2	2_85858144_AT_A	85858144	0	126	A	AT	0.06	0.2763648	0.1405139	0.05147463	0.04734291	0.05135469
2	2_86281222_G_A	86281222	0	126	A	G	0.032	-0.357684	0.1824341	0.05220225	0.04803379	0.0520589
2	2_88083849_T_C	88083849	0	126	C	T	0.246	0.1902637	0.08703863	0.03072713	0.02779186	0.03123465
2	2_88083883_G_A	88083883	0	126	A	G	0.016	-0.4985596	0.2523656	0.05046373	0.04638357	0.05037624
2	2_95772109_G_C	95772109	0	126	C	G	0.016	-0.4995788	0.2523259	0.04996637	0.04591179	0.04989481
2	2_95772118_A_C	95772118	0	126	C	A	0.028	-0.5123684	0.1906417	0.008201789	0.007099908	0.009017536
2	2_95947085_A_G	95947085	0	126	G	A	0.821	-0.1680493	0.08193604	0.04241002	0.03876294	0.04257651
2	2_95947099_G_A	95947099	0	126	A	G	0.099	0.2581118	0.1103172	0.02092269	0.01868651	0.02166043
2	2_96523006_A_C	96523006	0	126	C	A	0.802	0.1745865	0.07635367	0.02394625	0.02148231	0.02462159
2	2_96523009_A_C	96523009	0	126	C	A	0.802	0.1745865	0.07635367	0.02394625	0.02148231	0.02462159
2	2_96523047_A_G	96523047	0	126	G	A	0.813	0.169489	0.0772715	0.03017278	0.02727422	0.03069513
2	2_96585419_G_A	96585419	0	126	A	G	0.016	0.5379587	0.2516954	0.034566	0.03138436	0.03496678
2	2_96626292_C_T	96626292	0	126	T	C	0.976	0.4884358	0.2062131	0.01942624	0.0173075	0.02019096
2	2_96652816_CAA_C	96652816	0	126	C	CAA	0.337	0.1392741	0.0592616	0.02037061	0.01817737	0.02111864
2	2_96994050_T_TA	96994050	0	126	TA	T	0.119	-0.2175899	0.1063488	0.04290556	0.03923062	0.04305673
2	2_97587049_T_C	97587049	0	126	C	T	0.778	0.1861924	0.07491947	0.01430112	0.01261246	0.01513116
2	2_97595109_T_C	97595109	0	126	C	T	0.817	0.2126432	0.08334739	0.01196838	0.01049264	0.0128088
2	2_97613616_T_C	97613616	0	126	C	T	0.81	0.2227927	0.07998883	0.006202182	0.005318573	0.006972523
2	2_97617140_T_C	97617140	0	126	C	T	0.81	0.2227927	0.07998883	0.006202182	0.005318573	0.006972523
2	2_97617227_A_G	97617227	0	126	G	A	0.81	0.2227927	0.07998883	0.006202182	0.005318573	0.006972523
2	2_97633267_G_C	97633267	0	126	C	G	0.131	0.178084	0.09022877	0.05067664	0.04658556	0.05058231
2	2_97757347_G_A	97757347	0	126	A	G	0.131	0.1800353	0.0901007	0.0479236	0.04397562	0.04791718
2	2_97783831_C_T	97783831	0	126	T	C	0.131	0.1800353	0.0901007	0.0479236	0.04397562	0.04791718
2	2_97827790_T_C	97827790	0	126	C	T	0.131	0.2119369	0.08941775	0.01934662	0.01723422	0.02011269
2	2_97860529_G_A	97860529	0	126	A	G	0.147	0.2226806	0.08747285	0.01215123	0.01065834	0.01299142
2	2_97870072_A_T	97870072	0	126	T	A	0.155	0.1928803	0.0816944	0.01981066	0.01766144	0.02056873
2	2_97871626_A_G	97871626	0	126	G	A	0.155	0.1928803	0.0816944	0.01981066	0.01766144	0.02056873
2	2_97871906_G_A	97871906	0	126	A	G	0.131	0.1800353	0.0901007	0.0479236	0.04397562	0.04791718
2	2_97881267_G_A	97881267	0	126	A	G	0.151	0.2380666	0.08663111	0.006905248	0.00594299	0.007695007
2	2_97915941_A_C	97915941	0	126	C	A	0.06	0.252861	0.1272944	0.04922732	0.04521102	0.04917938
2	2_98306727_A_G	98306727	0	126	G	A	0.016	0.5539186	0.2511049	0.02926236	0.02642476	0.02980869
2	2_99172243_C_T	99172243	0	126	T	C	0.048	0.3932092	0.1495669	0.009665578	0.008413345	0.0104985
2	2_99725223_A_G	99725223	0	126	G	A	0.591	-0.1370245	0.06569112	0.03907243	0.03561763	0.03934071
2	2_99725479_A_AT	99725479	0	126	AT	A	0.599	-0.1298786	0.06394025	0.04440257	0.04064445	0.04450715
2	2_99802762_AT_A	99802762	0	126	A	AT	0.016	0.5371405	0.2516941	0.03483591	0.03163744	0.03522895
2	2_99812070_G_A	99812070	0	126	A	G	0.599	-0.1298786	0.06394025	0.04440257	0.04064445	0.04450715
2	2_99995613_A_G	99995613	0	126	G	A	0.012	0.5644924	0.2908412	0.05457736	0.05029102	0.05435733
2	2_100210074_G_C	100210074	0	126	C	G	0.214	-0.1630051	0.08043129	0.04487948	0.04109518	0.04496914
2	2_100210642_T_C	100210642	0	126	C	T	0.214	-0.1630051	0.08043129	0.04487948	0.04109518	0.04496914
2	2_100720794_G_A	100720794	0	126	A	G	0.091	-0.2165798	0.1036339	0.03870792	0.03527462	0.03898716
2	2_101185534_T_G	101185534	0	126	G	T	0.028	0.5767436	0.1894929	0.002863515	0.002391901	0.003458807
2	2_101192883_G_A	101192883	0	126	A	G	0.04	-0.3947616	0.1670583	0.01970785	0.01756675	0.02046772
2	2_102003962_T_C	102003962	0	126	C	T	0.159	0.1812374	0.0788414	0.02321998	0.02080965	0.02391116
2	2_102472459_A_G	102472459	0	126	G	A	0.163	-0.2492131	0.08757023	0.005197044	0.004430044	0.00593144
2	2_102788409_G_A	102788409	0	126	A	G	0.952	-0.396623	0.1488292	0.008741697	0.007583526	0.009565113
2	2_102792785_T_G	102792785	0	126	G	T	0.024	-0.4819385	0.2076701	0.02196381	0.01964783	0.02268117
2	2_102793246_A_G	102793246	0	126	G	A	0.024	-0.4819385	0.2076701	0.02196381	0.01964783	0.02268117
2	2_102955468_C_A	102955468	0	126	A	C	0.226	0.1643164	0.07967851	0.04130762	0.03772317	0.04150802
2	2_102957348_C_T	102957348	0	126	T	C	0.143	0.2054479	0.09835832	0.03880747	0.03536829	0.03908372
2	2_103013408_C_T	103013408	0	126	T	C	0.067	-0.4086212	0.1261009	0.001538478	0.001258023	0.001990118
2	2_103039873_C_G	103039873	0	126	G	C	0.175	0.2206018	0.09020473	0.01588969	0.01406265	0.01670481
2	2_103120179_C_T	103120179	0	126	T	C	0.143	-0.1869512	0.09175929	0.04377209	0.04004882	0.04389634
2	2_106715146_C_A	106715146	0	126	A	C	0.056	-0.2935768	0.1404295	0.03864321	0.03521374	0.03892439
2	2_107049392_T_A	107049392	0	126	A	T	0.274	0.2342411	0.08875363	0.00939389	0.008169035	0.01022446
2	2_107459974_C_T	107459974	0	126	T	C	0.123	-0.2382676	0.0994812	0.01813677	0.01612196	0.01892225
2	2_108443503_G_C	108443503	0	126	C	G	0.016	-0.4991728	0.2523412	0.05016354	0.04609879	0.05008566
2	2_110343422_G_T	110343422	0	126	T	G	0.02	-0.4911485	0.2255088	0.03133284	0.02835779	0.03182397
2	2_110375025_C_T	110375025	0	126	T	C	0.476	-0.4024299	0.1784743	0.02592693	0.02332004	0.02655667
2	2_110552150_A_G	110552150	2	124	G	A	0.52	-0.5123335	0.2513692	0.04369468	0.0399757	0.04382133
2	2_111406968_GAA_G	111406968	0	126	G	GAA	0.028	0.3974303	0.1943271	0.04298963	0.03930997	0.04313818
2	2_111744738_A_C	111744738	0	126	C	A	0.028	0.4250123	0.1927641	0.02934104	0.02649813	0.02988531
2	2_111886332_C_T	111886332	0	126	T	C	0.31	-0.145783	0.06294314	0.02222142	0.01988592	0.02293354
2	2_111902124_G_A	111902124	0	126	A	G	0.036	-0.387026	0.1706958	0.02512924	0.02257936	0.02577774
2	2_112551673_G_A	112551673	0	126	A	G	0.282	-0.1281411	0.0628429	0.04360333	0.03988942	0.04373283
2	2_112614384_C_G	112614384	0	126	G	C	0.012	0.5631559	0.2908516	0.05515217	0.05083776	0.05491353
2	2_112616040_T_C	112616040	0	126	C	T	0.028	0.4114582	0.1923523	0.03442129	0.0312487	0.03482621
2	2_113590390_G_A	113590390	0	126	A	G	0.23	-0.1936316	0.07529039	0.01131699	0.009903015	0.01215734
2	2_113671303_T_C	113671303	0	126	C	T	0.69	0.1614282	0.07180389	0.02636007	0.02372253	0.02697942
2	2_113671378_G_T	113671378	0	126	T	G	0.69	0.1614282	0.07180389	0.02636007	0.02372253	0.02697942
2	2_113671410_A_G	113671410	0	126	G	A	0.698	0.1875445	0.07244806	0.010805	0.009440351	0.01164422
2	2_113788590_C_G	113788590	0	126	G	C	0.131	-0.2121258	0.09636477	0.02959774	0.02673758	0.03013529
2	2_113953657_A_C	113953657	0	126	C	A	0.508	-0.1234971	0.06059049	0.04368919	0.03997051	0.04381602
2	2_113953952_T_C	113953952	0	126	C	T	0.508	-0.1234971	0.06059049	0.04368919	0.03997051	0.04381602
2	2_113955074_G_A	113955074	0	126	A	G	0.508	-0.1234971	0.06059049	0.04368919	0.03997051	0.04381602
2	2_113956371_G_C	113956371	0	126	C	G	0.508	-0.1234971	0.06059049	0.04368919	0.03997051	0.04381602
2	2_113956821_C_G	113956821	0	126	G	C	0.508	-0.1234971	0.06059049	0.04368919	0.03997051	0.04381602
2	2_114210817_GT_G	114210817	0	126	G	GT	0.198	0.205687	0.07752379	0.009034132	0.007845888	0.009861027
2	2_114220055_T_C	114220055	0	126	C	T	0.19	0.259155	0.07647235	0.0009456567	0.000760409	0.00129933
2	2_114256759_A_G	114256759	0	126	G	A	0.187	0.259757	0.07896394	0.001311807	0.001066805	0.001729657
2	2_114256840_C_T	114256840	0	126	T	C	0.187	0.259757	0.07896394	0.001311807	0.001066805	0.001729657
2	2_114256859_C_T	114256859	0	126	T	C	0.187	0.259757	0.07896394	0.001311807	0.001066805	0.001729657
2	2_114256978_A_C	114256978	0	126	C	A	0.19	0.259155	0.07647235	0.0009456567	0.000760409	0.00129933
2	2_114257443_A_C	114257443	0	126	C	A	0.127	0.2172071	0.08707354	0.01395018	0.01229278	0.01478273
2	2_114513901_C_T	114513901	0	126	T	C	0.202	-0.1795013	0.08028275	0.02717895	0.02448405	0.02777828
2	2_115822286_T_G	115822286	0	126	G	T	0.171	-0.1764671	0.08830035	0.04788732	0.04394126	0.04788205
2	2_116539856_T_C	116539856	0	126	C	T	0.028	0.4426395	0.1941167	0.02432725	0.02183545	0.02499408
2	2_116593692_T_A	116593692	0	126	A	T	0.056	-0.2871767	0.1404768	0.04307591	0.03939143	0.04322179
2	2_118575215_C_G	118575215	0	126	G	C	0.365	0.1215227	0.05973635	0.04408753	0.04034678	0.04420194
2	2_118701699_G_A	118701699	0	126	A	G	0.056	0.3514132	0.1393521	0.01296518	0.01139694	0.01380305
2	2_120059988_T_C	120059988	0	126	C	T	0.635	-0.1598206	0.06336991	0.01295601	0.01138861	0.01379392
2	2_120060082_T_C	120060082	0	126	C	T	0.639	-0.1430592	0.06417829	0.02763854	0.02491176	0.02822642
2	2_120125053_C_G	120125053	0	126	G	C	0.194	-0.186354	0.0742527	0.01339252	0.01178533	0.0142284
2	2_120125058_C_T	120125058	0	126	T	C	0.194	-0.186354	0.0742527	0.01339252	0.01178533	0.0142284
2	2_120125689_A_T	120125689	0	126	T	A	0.194	-0.186354	0.0742527	0.01339252	0.01178533	0.0142284
2	2_120125910_C_A	120125910	0	126	A	C	0.194	-0.186354	0.0742527	0.01339252	0.01178533	0.0142284
2	2_120712718_AT_A	120712718	0	126	A	AT	0.163	-0.1873532	0.09536442	0.05173351	0.04758869	0.05160525
2	2_121223274_C_T	121223274	0	126	T	C	0.052	0.4984374	0.1416636	0.0006106833	0.000483681	0.000890181
2	2_121727937_A_C	121727937	0	126	C	A	0.099	0.2196866	0.1115099	0.05109135	0.04697911	0.05098372
2	2_121732710_C_T	121732710	0	126	T	C	0.044	0.3710571	0.1661628	0.02736613	0.02465822	0.02796081
2	2_121740505_C_T	121740505	0	126	T	C	0.937	-0.2808966	0.1315659	0.03475868	0.03156502	0.03515393
2	2_121981950_A_G	121981950	0	126	G	A	0.262	0.1411859	0.06954736	0.04452426	0.04075945	0.04462504
2	2_122176128_G_A	122176128	0	126	A	G	0.016	0.5371434	0.2516941	0.03483493	0.03163652	0.035228
2	2_122520713_GTT_GTTT	122520713	0	126	GTTT	GTT	0.202	0.1955703	0.08981708	0.0313732	0.02839552	0.03186324
2	2_125192068_T_C	125192068	0	126	C	T	0.96	0.5101399	0.1676318	0.002867042	0.002394948	0.00346263
2	2_125204264_A_G	125204264	0	126	G	A	0.04	-0.5101399	0.1676318	0.002867042	0.002394948	0.00346263
2	2_125281910_C_T	125281910	0	126	T	C	0.036	-0.3937469	0.1707368	0.02278911	0.02041091	0.02348945
2	2_125405302_C_T	125405302	0	126	T	C	0.607	-0.1289427	0.06155969	0.03827605	0.03486835	0.03856821
2	2_125504881_T_C	125504881	0	126	C	T	0.016	-0.4992327	0.2523389	0.05013441	0.04607116	0.05005746
2	2_127816632_G_A	127816632	0	126	A	G	0.175	-0.2377835	0.08992176	0.009260988	0.008049609	0.01009027
2	2_127821452_C_T	127821452	0	126	T	C	0.167	-0.2409452	0.09045615	0.008773284	0.007611851	0.009597098
2	2_127864546_G_A	127864546	0	126	A	G	0.131	-0.2151332	0.09644123	0.02752752	0.02480842	0.02811817
2	2_128015143_G_A	128015143	0	126	A	G	0.016	0.5536214	0.2511063	0.02934835	0.02650496	0.02989244
2	2_128283747_C_G	128283747	0	126	G	C	0.016	0.5536214	0.2511063	0.02934835	0.02650496	0.02989244
2	2_128393908_T_C	128393908	0	126	C	T	0.02	-0.4801686	0.2264448	0.03599175	0.03272191	0.03635134
2	2_128394352_A_C	128394352	0	126	C	A	0.028	0.4247507	0.1927638	0.02943863	0.02658916	0.02998035
2	2_128400433_G_A	128400433	0	126	A	G	0.044	-0.3089374	0.1571349	0.05156225	0.04742609	0.05143949
2	2_128400608_C_T	128400608	0	126	T	C	0.552	0.1912345	0.06350001	0.003160047	0.002648488	0.003779054
2	2_130832189_G_A	130832189	0	126	A	G	0.016	0.58097	0.2525744	0.02313595	0.02073187	0.02382894
2	2_130834633_G_T	130834633	0	126	T	G	0.23	-0.1723722	0.08910161	0.05535964	0.05103514	0.05511427
2	2_130911410_T_C	130911410	0	126	C	T	0.016	0.5363648	0.2516944	0.03509455	0.03188001	0.03548014
2	2_130949399_T_A	130949399	0	126	A	T	0.012	0.5652352	0.2908373	0.05426159	0.04999074	0.05405177
2	2_131116404_T_C	131116404	0	126	C	T	0.218	-0.1390167	0.06907863	0.04637555	0.04251008	0.04641816
2	2_131117120_G_A	131117120	0	126	A	G	0.091	-0.2528871	0.1142536	0.02873067	0.02592905	0.02929079
2	2_131220761_G_A	131220761	0	126	A	G	0.016	0.58097	0.2525744	0.02313595	0.02073187	0.02382894
2	2_131221170_C_T	131221170	0	126	T	C	0.873	0.2770266	0.09579905	0.004537374	0.003849961	0.005241738
2	2_131221445_G_A	131221445	0	126	A	G	0.849	0.1865671	0.09636471	0.05517434	0.05085885	0.05493498
2	2_131221663_G_A	131221663	0	126	A	G	0.02	-0.5094297	0.2260486	0.02600494	0.02339252	0.02663283
2	2_131266530_C_A	131266530	0	126	A	C	0.865	0.1997289	0.09971709	0.04739873	0.04347856	0.04740897
2	2_131266746_C_T	131266746	0	126	T	C	0.151	-0.2115698	0.08634791	0.01569631	0.01388585	0.01651354
2	2_131369168_G_A	131369168	0	126	A	G	0.048	-0.3425362	0.1499407	0.02407156	0.02159844	0.02474411
2	2_131379209_T_C	131379209	0	126	C	T	0.131	-0.2267802	0.1001536	0.02531982	0.02275625	0.02596389
2	2_131389993_T_C	131389993	0	126	C	T	0.028	0.3959713	0.1967969	0.04641406	0.04254651	0.04645545
2	2_131414404_C_T	131414404	0	126	T	C	0.02	0.537412	0.2280856	0.0200575	0.01788882	0.0208112
2	2_131673259_A_G	131673259	0	126	G	A	0.067	-0.3303007	0.1311797	0.01310012	0.01151953	0.01393742
2	2_132021404_C_T	132021404	0	126	T	C	0.143	-0.1924807	0.09797638	0.05173815	0.04759309	0.05160973
2	2_132021475_G_A	132021475	0	126	A	G	0.143	-0.1924807	0.09797638	0.05173815	0.04759309	0.05160973
2	2_132021815_G_A	132021815	0	126	A	G	0.143	-0.1924807	0.09797638	0.05173815	0.04759309	0.05160973
2	2_132021857_C_T	132021857	0	126	T	C	0.143	-0.1924807	0.09797638	0.05173815	0.04759309	0.05160973
2	2_135260419_C_T	135260419	0	126	T	C	0.044	-0.3053287	0.1583069	0.05608935	0.05172955	0.05582033
2	2_135676647_C_T	135676647	0	126	T	C	0.036	0.4460453	0.1696784	0.009671423	0.008418604	0.01050439
2	2_135762980_C_T	135762980	0	126	T	C	0.163	0.2098245	0.08353497	0.01331747	0.01171709	0.01415374
2	2_135911422_T_C	135911422	0	126	C	T	0.381	0.1577936	0.05630923	0.005904001	0.005054445	0.006664767
2	2_136393658_A_G	136393658	0	126	G	A	0.198	0.1945059	0.07811576	0.01412126	0.01244858	0.01495262
2	2_136396300_T_C	136396300	0	126	C	T	0.202	0.1986025	0.07598798	0.01008693	0.008792687	0.01092283
2	2_136407445_A_G	136407445	0	126	G	A	0.202	0.1986025	0.07598798	0.01008693	0.008792687	0.01092283
2	2_136407479_A_G	136407479	0	126	G	A	0.405	0.1840727	0.05528187	0.001150184	0.0009311406	0.001541383
2	2_136467119_C_T	136467119	0	126	T	C	0.202	0.1986025	0.07598798	0.01008693	0.008792687	0.01092283
2	2_136511817_A_G	136511817	0	126	G	A	0.19	0.1642719	0.0787526	0.03906932	0.03561471	0.0393377
2	2_136527443_G_GTGAT	136527443	0	126	GTGAT	G	0.651	-0.1935648	0.05502097	0.0006116044	0.0004844359	0.000891335
2	2_136545844_C_G	136545844	0	126	G	C	0.81	-0.1983585	0.0806966	0.01537251	0.01358998	0.01619309
2	2_136546110_A_G	136546110	0	126	G	A	0.718	-0.2232458	0.06349164	0.0006155314	0.0004876545	0.0008962525
2	2_136552188_G_A	136552188	0	126	A	G	0.187	0.2175201	0.08036654	0.007772263	0.006715914	0.008580661
2	2_136552411_T_C	136552411	0	126	C	T	0.016	0.5369103	0.2516941	0.03491238	0.03170916	0.03530322
2	2_136555525_T_G	136555525	0	126	G	T	0.187	0.2175201	0.08036654	0.007772263	0.006715914	0.008580661
2	2_136555659_T_C	136555659	0	126	C	T	0.694	-0.2327555	0.06145967	0.0002379185	0.0001823624	0.0004001267
2	2_136558157_C_T	136558157	0	126	T	C	0.659	-0.2244146	0.05672524	0.0001283361	9.626936e-05	0.0002397147
2	2_136561557_G_A	136561557	0	126	A	G	0.794	-0.2351527	0.07661027	0.002643305	0.00220193	0.003219392
2	2_136561735_G_A	136561735	0	126	A	G	0.198	0.2395811	0.07672425	0.00223888	0.001854469	0.002775546
2	2_136562472_G_A	136562472	0	126	A	G	0.115	0.2043773	0.09438046	0.03229827	0.02926054	0.03276291
2	2_136569848_C_A	136569848	0	126	A	C	0.655	-0.2283827	0.05618591	8.550106e-05	6.323106e-05	0.0001719409
2	2_136575199_G_T	136575199	0	126	T	G	0.655	-0.2283827	0.05618591	8.550106e-05	6.323106e-05	0.0001719409
2	2_136590746_C_T	136590746	0	126	T	C	0.21	0.229523	0.07534854	0.002841202	0.002372629	0.003434614
2	2_136594158_G_A	136594158	0	126	A	G	0.655	-0.2283827	0.05618591	8.550106e-05	6.323106e-05	0.0001719409
2	2_136614255_G_A	136614255	0	126	A	G	0.655	-0.2283827	0.05618591	8.550106e-05	6.323106e-05	0.0001719409
2	2_136622543_T_G	136622543	0	126	G	T	0.19	0.2149277	0.07774625	0.006586692	0.005659795	0.007368174
2	2_136633771_T_C	136633771	0	126	C	T	0.345	0.2283827	0.05618591	8.550106e-05	6.323106e-05	0.0001719409
2	2_136633962_G_A	136633962	0	126	A	G	0.198	0.2392671	0.07677143	0.002281531	0.001891018	0.002822636
2	2_136680534_A_G	136680534	0	126	G	A	0.206	0.1765081	0.07582921	0.0215749	0.01928856	0.02230002
2	2_136690425_A_G	136690425	0	126	G	A	0.202	0.1898838	0.07790166	0.01623221	0.01437597	0.01704341
2	2_136740900_T_C	136740900	0	126	C	T	0.345	0.2059398	0.05780826	0.0005250431	0.000413678	0.0007819778
2	2_136743143_G_C	136743143	0	126	C	G	0.198	0.1977402	0.08016005	0.01502014	0.01326823	0.01584412
2	2_136873549_A_T	136873549	0	126	T	A	0.448	-0.1447753	0.06139299	0.01995526	0.01779462	0.02071078
2	2_141625410_A_C	141625410	0	126	C	A	0.147	-0.2235649	0.09773909	0.02389724	0.0214369	0.02457366
2	2_143676145_T_A	143676145	0	126	A	T	0.099	-0.263105	0.1023881	0.01138264	0.009962385	0.01222305
2	2_143746494_C_G	143746494	0	126	G	C	0.202	-0.1514233	0.07639835	0.04972452	0.04568243	0.04966069
2	2_143798189_A_G	143798189	0	126	G	A	0.159	-0.2276965	0.08792937	0.0107794	0.009417237	0.01161854
2	2_144193293_C_T	144193293	0	126	T	C	0.04	0.4669855	0.1605878	0.004323058	0.003662091	0.005016352
2	2_145255387_T_C	145255387	0	126	C	T	0.095	-0.2477207	0.1065964	0.02178455	0.0194822	0.0225055
2	2_149798213_G_A	149798213	0	126	A	G	0.095	0.2198841	0.1070918	0.04218789	0.03855336	0.04236123
2	2_149799216_T_C	149799216	0	126	C	T	0.095	0.2198841	0.1070918	0.04218789	0.03855336	0.04236123
2	2_152135415_C_T	152135415	0	126	T	C	0.044	-0.308327	0.1571617	0.05205754	0.04789637	0.05191885
2	2_152397232_G_A	152397232	0	126	A	G	0.028	0.4022337	0.192864	0.03910084	0.03564437	0.03936827
2	2_152449688_A_G	152449688	0	126	G	A	0.028	0.4021767	0.1928635	0.03912772	0.03566967	0.03939435
2	2_152487808_A_T	152487808	0	126	T	A	0.028	0.4022337	0.192864	0.03910084	0.03564437	0.03936827
2	2_152499143_C_T	152499143	0	126	T	C	0.012	0.5648981	0.2908389	0.05440458	0.05012671	0.05419014
2	2_152500449_C_G	152500449	0	126	G	C	0.433	-0.1256975	0.06021466	0.03892503	0.03547891	0.03919775
2	2_152536175_A_AGC	152536175	0	126	AGC	A	0.02	-0.479718	0.2264591	0.03617476	0.03289371	0.036529
2	2_153574092_G_C	153574092	0	126	C	G	0.067	0.2440602	0.1214202	0.04663203	0.04275278	0.04666654
2	2_153574145_TG_T	153574145	0	126	T	TG	0.135	0.2925659	0.09109925	0.00168846	0.001385085	0.002160518
2	2_158275111_TA_TAA	158275111	0	126	TAA	TA	0.468	-0.2397659	0.1065732	0.02625563	0.02362546	0.0268775
2	2_158636910_G_A	158636910	0	126	A	G	0.738	-0.1472097	0.07428485	0.04976207	0.04571804	0.04969704
2	2_158637136_GA_G	158637136	0	126	G	GA	0.214	0.1874119	0.08969315	0.03874246	0.03530712	0.03902066
2	2_159477867_A_C	159477867	0	126	C	A	0.024	0.5456167	0.2061739	0.009208035	0.008002042	0.01003679
2	2_159497071_A_C	159497071	0	126	C	A	0.016	0.5371626	0.2516941	0.03482856	0.03163055	0.03522181
2	2_159514812_G_A	159514812	0	126	A	G	0.012	0.5643907	0.2908418	0.05462083	0.05033236	0.05439939
2	2_159517857_C_T	159517857	0	126	T	C	0.012	0.5643907	0.2908418	0.05462083	0.05033236	0.05439939
2	2_159517972_G_T	159517972	0	126	T	G	0.016	0.5378975	0.2516952	0.0345861	0.0314032	0.0349863
2	2_159526188_C_G	159526188	0	126	G	C	0.012	0.5643907	0.2908418	0.05462083	0.05033236	0.05439939
2	2_160239112_T_C	160239112	0	126	C	T	0.04	0.366613	0.1629584	0.0262585	0.02362813	0.0268803
2	2_160688351_C_T	160688351	0	126	T	C	0.456	0.1558451	0.0660314	0.01985313	0.01770055	0.02061045
2	2_160691978_G_A	160691978	0	126	A	G	0.171	0.163918	0.08510609	0.05642544	0.05204948	0.05614551
2	2_160698698_C_A	160698698	0	126	A	C	0.036	0.3341296	0.1716597	0.05389769	0.04964477	0.05369964
2	2_160708645_C_G	160708645	0	126	G	C	0.492	0.1535582	0.06732601	0.02429424	0.02180484	0.02496181
2	2_160708867_C_G	160708867	0	126	G	C	0.012	0.5654468	0.2908364	0.05417213	0.04990568	0.05396521
2	2_160708923_GT_G	160708923	0	126	G	GT	0.425	0.1718153	0.0571155	0.003192708	0.0026768	0.003814188
2	2_160710922_T_C	160710922	0	126	C	T	0.552	0.1617537	0.06757705	0.01820686	0.01618633	0.01899128
2	2_160711045_G_C	160711045	0	126	C	G	0.452	-0.1735333	0.06780494	0.01170995	0.01025858	0.01255051
2	2_160735008_C_T	160735008	0	126	T	C	0.194	-0.1808003	0.07647272	0.01964554	0.01750938	0.02040649
2	2_160737621_C_T	160737621	0	126	T	C	0.194	-0.1808003	0.07647272	0.01964554	0.01750938	0.02040649
2	2_160738677_G_A	160738677	0	126	A	G	0.194	-0.1808003	0.07647272	0.01964554	0.01750938	0.02040649
2	2_160742862_G_A	160742862	0	126	A	G	0.194	-0.1808003	0.07647272	0.01964554	0.01750938	0.02040649
2	2_160808075_C_T	160808075	0	126	T	C	0.46	0.1408753	0.06519606	0.03266553	0.02960418	0.03311998
2	2_160832510_T_A	160832510	1	125	A	T	0.044	-0.3341495	0.1567926	0.03508278	0.03186897	0.03546871
2	2_160832514_T_A	160832514	1	125	A	T	0.084	-0.2801168	0.1181345	0.01929775	0.01718924	0.02006465
2	2_160832518_T_A	160832518	0	126	A	T	0.056	-0.2868533	0.140495	0.04333427	0.03963535	0.04347213
2	2_162081128_AT_ATT	162081128	0	126	ATT	AT	0.048	-0.3302222	0.1502635	0.02986434	0.02698634	0.03039487
2	2_162821515_G_A	162821515	0	126	A	G	0.381	-0.132763	0.06623635	0.04724356	0.04333164	0.04725871
2	2_163374577_G_A	163374577	0	126	A	G	0.04	0.2937665	0.1481175	0.04957606	0.04554165	0.04951698
2	2_165996107_T_A	165996107	0	126	A	T	0.417	0.1486746	0.06247565	0.0188755	0.01680082	0.01964939
2	2_166018764_C_CT	166018764	0	126	CT	C	0.147	0.2233179	0.09504042	0.02039372	0.01819868	0.02114133
2	2_166179650_C_T	166179650	0	126	T	C	0.627	-0.1306781	0.06441239	0.04465823	0.04088605	0.04475481
2	2_166229930_T_A	166229930	0	126	A	T	0.171	-0.177289	0.0748772	0.01946979	0.01734758	0.02023376
2	2_166514594_A_G	166514594	0	126	G	A	0.73	0.1429619	0.07399586	0.05567478	0.051335	0.0554192
2	2_166758447_TA_T	166758447	0	126	T	TA	0.206	-0.2014534	0.08997893	0.02697536	0.02429465	0.02757971
2	2_167138320_TA_TAA	167138320	0	126	TAA	TA	0.075	-0.2540357	0.1237559	0.04223874	0.03860134	0.04241052
2	2_169020187_G_A	169020187	0	126	A	G	0.036	0.3326885	0.171652	0.05491432	0.0506115	0.05468338
2	2_169870882_A_G	169870882	0	126	G	A	0.079	-0.2277039	0.1151683	0.05028088	0.0462101	0.05019924
2	2_169994021_AAG_A	169994021	0	126	A	AAG	0.21	0.1897594	0.0900663	0.03717581	0.03383399	0.03750065
2	2_170053505_C_T	170053505	0	126	T	C	0.246	0.163807	0.07036192	0.02155531	0.01927046	0.02228081
2	2_170053580_C_T	170053580	0	126	T	C	0.254	0.1583608	0.06899236	0.02342154	0.02099627	0.02410837
2	2_170055255_T_C	170055255	0	126	C	T	0.242	0.1534628	0.07052018	0.03147059	0.02848654	0.03195797
2	2_170096018_G_A	170096018	0	126	A	G	0.361	-0.1248784	0.06256181	0.04815219	0.04419216	0.0481385
2	2_170099446_T_G	170099446	0	126	G	T	0.524	-0.1593725	0.06250848	0.01202303	0.01054215	0.01286339
2	2_170099473_T_C	170099473	0	126	C	T	0.516	-0.1628143	0.06170187	0.009407088	0.008180897	0.01023778
2	2_170099895_A_C	170099895	0	126	C	A	0.528	-0.1481257	0.06230011	0.01897869	0.01689572	0.0197509
2	2_170099899_G_A	170099899	0	126	A	G	0.524	-0.1593725	0.06250848	0.01202303	0.01054215	0.01286339
2	2_170103336_T_C	170103336	0	126	C	T	0.524	-0.1593725	0.06250848	0.01202303	0.01054215	0.01286339
2	2_170115588_T_C	170115588	0	126	C	T	0.536	-0.1368438	0.06366154	0.03356483	0.03044616	0.03399407
2	2_170134191_G_C	170134191	0	126	C	G	0.706	0.1397981	0.067172	0.03950767	0.03602733	0.03976283
2	2_170136180_A_C	170136180	0	126	C	A	0.04	0.2934654	0.1481154	0.04980332	0.04575715	0.04973697
2	2_170460823_T_G	170460823	0	126	G	T	0.02	0.3888063	0.1898776	0.04273922	0.03907361	0.04289553
2	2_170460837_GTTTT_GTTT	170460837	0	126	GTTT	GTTTT	0.083	0.1871832	0.0945893	0.0500793	0.04601889	0.05000411
2	2_170531144_C_G	170531144	0	126	G	C	0.028	-0.3742846	0.1946537	0.05683309	0.0524376	0.05653993
2	2_171239560_A_G	171239560	0	126	G	A	0.337	0.1318196	0.06467807	0.04370307	0.03998362	0.04382947
2	2_171240249_C_T	171240249	0	126	T	C	0.337	0.1712646	0.06525829	0.009789188	0.008524575	0.01062307
2	2_171260708_C_A	171260708	0	126	A	C	0.881	0.1969736	0.1006126	0.0525432	0.04835762	0.05238886
2	2_171260787_G_A	171260787	0	126	A	G	0.881	0.1969736	0.1006126	0.0525432	0.04835762	0.05238886
2	2_171260797_A_G	171260797	0	126	G	A	0.361	0.1717758	0.06403947	0.008324326	0.00720958	0.009141963
2	2_171260820_T_C	171260820	0	126	C	T	0.881	0.1969736	0.1006126	0.0525432	0.04835762	0.05238886
2	2_172582619_C_T	172582619	0	126	T	C	0.028	-0.4895836	0.191497	0.01179613	0.01033662	0.01263667
2	2_173848200_CT_C	173848200	0	126	C	CT	0.135	-0.2129451	0.09996903	0.03517074	0.03195148	0.03555414
2	2_174094345_A_T	174094345	0	126	T	A	0.274	0.1272221	0.06555416	0.05459926	0.05031185	0.05437852
2	2_174094500_G_A	174094500	0	126	A	G	0.254	0.1419696	0.06773547	0.03815429	0.03475383	0.03845008
2	2_175006700_G_A	175006700	0	126	A	G	0.012	0.6065156	0.2946084	0.04165004	0.03804605	0.04183994
2	2_175432855_G_A	175432855	0	126	A	G	0.095	-0.2176815	0.1128382	0.05603499	0.05167781	0.05576773
2	2_175613621_T_C	175613621	0	126	C	T	0.012	0.5652998	0.290837	0.05423427	0.04996476	0.05402533
2	2_175629159_T_C	175629159	0	126	C	T	0.012	0.5652998	0.290837	0.05423427	0.04996476	0.05402533
2	2_175939604_G_A	175939604	0	126	A	G	0.087	-0.2412169	0.1162293	0.0400551	0.03654284	0.04029369
2	2_175945338_G_A	175945338	0	126	A	G	0.091	-0.2445395	0.1161407	0.03729445	0.03394548	0.03761578
2	2_175945502_GA_G	175945502	0	126	G	GA	0.087	-0.2412169	0.1162293	0.0400551	0.03654284	0.04029369
2	2_176804220_TAC_TACAC	176804220	0	126	TACAC	TAC	0.19	-0.272122	0.08622006	0.002014281	0.001662399	0.002526322
2	2_176844508_A_T	176844508	0	126	T	A	0.187	-0.3029646	0.08286754	0.0003791573	0.0002953764	0.000592571
2	2_176844644_C_T	176844644	0	126	T	C	0.194	-0.2522569	0.08108449	0.002321812	0.001925558	0.002867045
2	2_176964947_G_A	176964947	0	126	A	G	0.02	0.5689824	0.2247622	0.01262905	0.01109173	0.01346812
2	2_177054769_G_A	177054769	0	126	A	G	0.202	0.178699	0.07653749	0.02118828	0.0189316	0.02192094
2	2_178301428_C_T	178301428	0	126	T	C	0.877	0.2775931	0.09304891	0.003444789	0.002895641	0.004084521
2	2_178417142_C_T	178417142	0	126	T	C	0.845	0.2334839	0.08313204	0.005796323	0.004959173	0.006553418
2	2_178417225_C_T	178417225	0	126	T	C	0.849	0.2381446	0.08638517	0.00673433	0.005790989	0.007519751
2	2_178481818_G_T	178481818	0	126	T	G	0.845	0.2021306	0.08371758	0.01724464	0.01530332	0.01804295
2	2_178482094_C_T	178482094	0	126	T	C	0.845	0.2021306	0.08371758	0.01724464	0.01530332	0.01804295
2	2_178528703_C_T	178528703	0	126	T	C	0.833	0.2060205	0.08226493	0.0135873	0.0119625	0.01442212
2	2_178534324_A_G	178534324	0	126	G	A	0.833	0.2060205	0.08226493	0.0135873	0.0119625	0.01442212
2	2_178540293_A_G	178540293	0	126	G	A	0.802	0.1797179	0.07552447	0.01888151	0.01680635	0.0196553
2	2_179358665_A_G	179358665	0	126	G	A	0.119	-0.1788585	0.09244243	0.05532834	0.05100536	0.05508399
2	2_179367086_A_G	179367086	0	126	G	A	0.131	-0.1843497	0.0899861	0.04264184	0.0389817	0.04280116
2	2_179392080_A_T	179392080	0	126	T	A	0.131	-0.1998042	0.09285651	0.03338717	0.03027977	0.03382142
2	2_179395958_T_C	179395958	0	126	C	T	0.238	-0.175747	0.0714872	0.01535778	0.01357652	0.0161785
2	2_179396162_C_G	179396162	0	126	G	C	0.028	-0.37533	0.1686909	0.02792241	0.02517606	0.02850315
2	2_179396354_G_A	179396354	0	126	A	G	0.131	-0.1998042	0.09285651	0.03338717	0.03027977	0.03382142
2	2_179397561_C_T	179397561	0	126	T	C	0.131	-0.1998042	0.09285651	0.03338717	0.03027977	0.03382142
2	2_179398823_G_A	179398823	0	126	A	G	0.131	-0.1998042	0.09285651	0.03338717	0.03027977	0.03382142
2	2_179403593_G_A	179403593	0	126	A	G	0.123	-0.206901	0.09456298	0.03057739	0.02765201	0.03108893
2	2_179404786_A_T	179404786	0	126	T	A	0.131	-0.1998042	0.09285651	0.03338717	0.03027977	0.03382142
2	2_179406003_C_A	179406003	0	126	A	C	0.234	-0.1654296	0.07174481	0.02280971	0.02042997	0.02350962
2	2_179406191_C_T	179406191	0	126	T	C	0.131	-0.1998042	0.09285651	0.03338717	0.03027977	0.03382142
2	2_179407763_CTT_C	179407763	0	126	C	CTT	0.036	-0.3942202	0.1707129	0.02261101	0.02024616	0.02331509
2	2_179411665_A_G	179411665	0	126	G	A	0.163	-0.1919713	0.08510981	0.02587924	0.02327574	0.02651012
2	2_179413110_G_A	179413110	0	126	A	G	0.131	-0.1998042	0.09285651	0.03338717	0.03027977	0.03382142
2	2_179414633_C_A	179414633	0	126	A	C	0.163	-0.1919713	0.08510981	0.02587924	0.02327574	0.02651012
2	2_179421694_A_G	179421694	0	126	G	A	0.234	-0.1654296	0.07174481	0.02280971	0.02042997	0.02350962
2	2_179427186_A_G	179427186	0	126	G	A	0.234	-0.1654296	0.07174481	0.02280971	0.02042997	0.02350962
2	2_179427536_T_C	179427536	0	126	C	T	0.234	-0.1654296	0.07174481	0.02280971	0.02042997	0.02350962
2	2_179430997_G_A	179430997	0	126	A	G	0.167	-0.1732645	0.08497672	0.04361416	0.03989965	0.04374332
2	2_179436020_G_A	179436020	0	126	A	G	0.131	-0.1998042	0.09285651	0.03338717	0.03027977	0.03382142
2	2_179444137_A_G	179444137	0	126	G	A	0.167	-0.1732645	0.08497672	0.04361416	0.03989965	0.04374332
2	2_179444939_C_T	179444939	0	126	T	C	0.183	-0.1814541	0.08097377	0.02684151	0.02417016	0.02744915
2	2_179446381_C_T	179446381	0	126	T	C	0.02	0.5167776	0.2508493	0.04151433	0.03791806	0.04170839
2	2_179447848_T_C	179447848	0	126	C	T	0.234	-0.1654296	0.07174481	0.02280971	0.02042997	0.02350962
2	2_179451420_G_A	179451420	0	126	A	G	0.234	-0.1654296	0.07174481	0.02280971	0.02042997	0.02350962
2	2_179454394_A_G	179454394	0	126	G	A	0.234	-0.1654296	0.07174481	0.02280971	0.02042997	0.02350962
2	2_179455207_T_C	179455207	0	126	C	T	0.234	-0.1654296	0.07174481	0.02280971	0.02042997	0.02350962
2	2_179457147_G_A	179457147	0	126	A	G	0.131	-0.1998042	0.09285651	0.03338717	0.03027977	0.03382142
2	2_179458591_C_T	179458591	0	126	T	C	0.131	-0.1998042	0.09285651	0.03338717	0.03027977	0.03382142
2	2_179464527_T_C	179464527	0	126	C	T	0.234	-0.1654296	0.07174481	0.02280971	0.02042997	0.02350962
2	2_179467330_G_GA	179467330	0	126	GA	G	0.016	-0.5275239	0.2544288	0.04024296	0.0367198	0.04047585
2	2_179514433_T_C	179514433	0	126	C	T	0.183	-0.1584627	0.08148178	0.05410475	0.04984161	0.0539
2	2_179527851_C_A	179527851	0	126	A	C	0.044	-0.4307384	0.1547187	0.006225341	0.005339106	0.006996391
2	2_179543217_C_T	179543217	0	126	T	C	0.147	-0.1887941	0.09038215	0.03880081	0.03536202	0.03907726
2	2_179558366_T_C	179558366	0	126	C	T	0.226	-0.1765304	0.07325317	0.01745185	0.01549334	0.0182473
2	2_179575511_C_T	179575511	0	126	T	C	0.048	-0.3573643	0.1369464	0.01020153	0.008895946	0.0110381
2	2_179576596_A_T	179576596	0	126	T	A	0.19	-0.1633738	0.0767067	0.03519274	0.03197212	0.03557551
2	2_179578108_T_TACAAA	179578108	0	126	TACAAA	T	0.155	-0.2060804	0.08091614	0.01211405	0.01062464	0.01295429
2	2_179578730_G_A	179578730	0	126	A	G	0.19	-0.1633738	0.0767067	0.03519274	0.03197212	0.03557551
2	2_179579093_T_C	179579093	0	126	C	T	0.143	-0.1946722	0.08783475	0.02852183	0.02573443	0.02908732
2	2_179579212_T_C	179579212	0	126	C	T	0.194	-0.1487324	0.07668839	0.05475641	0.05046131	0.05453058
2	2_179579822_T_A	179579822	0	126	A	T	0.19	-0.1633738	0.0767067	0.03519274	0.03197212	0.03557551
2	2_179582162_C_T	179582162	0	126	T	C	0.139	-0.1966315	0.09165837	0.03391346	0.03077276	0.03433284
2	2_179582327_C_T	179582327	0	126	T	C	0.139	-0.1966315	0.09165837	0.03391346	0.03077276	0.03433284
2	2_179582537_G_T	179582537	0	126	T	G	0.19	-0.1633738	0.0767067	0.03519274	0.03197212	0.03557551
2	2_179582605_A_G	179582605	0	126	G	A	0.139	-0.1966315	0.09165837	0.03391346	0.03077276	0.03433284
2	2_179583398_T_C	179583398	0	126	C	T	0.139	-0.1966315	0.09165837	0.03391346	0.03077276	0.03433284
2	2_179583496_T_G	179583496	0	126	G	T	0.139	-0.1966315	0.09165837	0.03391346	0.03077276	0.03433284
2	2_179585393_A_G	179585393	0	126	G	A	0.194	-0.1487324	0.07668839	0.05475641	0.05046131	0.05453058
2	2_179587130_C_G	179587130	0	126	G	C	0.139	-0.1966315	0.09165837	0.03391346	0.03077276	0.03433284
2	2_179587687_T_C	179587687	0	126	C	T	0.194	-0.1487324	0.07668839	0.05475641	0.05046131	0.05453058
2	2_179647824_G_A	179647824	0	126	A	G	0.04	-0.3996835	0.162259	0.01516333	0.01339895	0.01598596
2	2_179659912_G_A	179659912	0	126	A	G	0.056	-0.2916168	0.1406598	0.04025797	0.03673394	0.0404904
2	2_179732980_A_G	179732980	0	126	G	A	0.81	-0.170474	0.08838427	0.05608074	0.05172136	0.05581199
2	2_179839888_G_A	179839888	0	126	A	G	0.036	-0.3874128	0.1706829	0.02497629	0.02243743	0.02562833
2	2_179974761_A_C	179974761	0	126	C	A	0.04	-0.5049126	0.1623405	0.002327854	0.001930741	0.002873701
2	2_179988395_T_TA	179988395	0	126	TA	T	0.627	0.2443337	0.09841966	0.01440319	0.01270548	0.01523244
2	2_179996977_T_C	179996977	0	126	C	T	0.04	-0.5049126	0.1623405	0.002327854	0.001930741	0.002873701
2	2_180015941_TA_T	180015941	0	126	T	TA	0.044	-0.4244839	0.1426313	0.003521121	0.002962015	0.004166098
2	2_180016141_G_C	180016141	0	126	C	G	0.04	-0.5049126	0.1623405	0.002327854	0.001930741	0.002873701
2	2_180036775_G_A	180036775	0	126	A	G	0.036	-0.4981312	0.1703075	0.004109603	0.003475285	0.004791152
2	2_180810202_C_T	180810202	0	126	T	C	0.06	-0.3090515	0.1408671	0.03013583	0.02723973	0.03065916
2	2_182360182_T_C	182360182	0	126	C	T	0.131	0.2687992	0.09167941	0.004023471	0.003399998	0.004700065
2	2_182374328_T_A	182374328	0	126	A	T	0.306	-0.1523622	0.06631403	0.02328891	0.02087347	0.02397861
2	2_182374553_A_T	182374553	0	126	T	A	0.298	-0.1449747	0.06880847	0.03717179	0.03383022	0.03749675
2	2_182374567_A_G	182374567	0	126	G	A	0.298	-0.1449747	0.06880847	0.03717179	0.03383022	0.03749675
2	2_182392143_G_C	182392143	0	126	C	G	0.325	-0.1426704	0.06729206	0.0360175	0.03274608	0.03637634
2	2_182395345_G_A	182395345	0	126	A	G	0.675	0.1426704	0.06729206	0.0360175	0.03274608	0.03637634
2	2_182399685_C_T	182399685	0	126	T	C	0.302	-0.1943641	0.06801228	0.005017792	0.00427216	0.00574459
2	2_182521578_G_A	182521578	0	126	A	G	0.472	0.2049355	0.06560735	0.002231562	0.0018482	0.002767458
2	2_182543455_T_C	182543455	0	126	C	T	0.599	0.2000544	0.06895594	0.004411494	0.003739577	0.005109441
2	2_183699584_G_C	183699584	0	126	C	G	0.075	-0.2486397	0.1233383	0.04600541	0.04215988	0.04605969
2	2_183699768_G_A	183699768	0	126	A	G	0.075	-0.2486397	0.1233383	0.04600541	0.04215988	0.04605969
2	2_183731193_C_A	183731193	0	126	A	C	0.044	-0.344189	0.1418698	0.01672575	0.01482781	0.0175309
2	2_183806893_TA_T	183806893	0	126	T	TA	0.135	-0.1899189	0.09590273	0.04991703	0.04586499	0.04984704
2	2_183827018_G_A	183827018	0	126	A	G	0.754	0.1476134	0.07533866	0.05235475	0.04817863	0.05220649
2	2_183848053_A_G	183848053	0	126	G	A	0.04	-0.4032302	0.1619902	0.01414939	0.01247421	0.01498055
2	2_183943952_C_T	183943952	0	126	T	C	0.044	-0.4070374	0.1613066	0.01290891	0.01134583	0.01374701
2	2_188243620_A_G	188243620	0	126	G	A	0.024	-0.3711216	0.1782651	0.03944662	0.03596986	0.03970363
2	2_189864582_T_C	189864582	0	126	C	T	0.294	-0.1348593	0.06824419	0.05039671	0.04631998	0.05031136
2	2_189866199_T_A	189866199	0	126	A	T	0.706	0.1348593	0.06824419	0.05039671	0.04631998	0.05031136
2	2_189907565_A_G	189907565	0	126	G	A	0.028	-0.4898923	0.1914839	0.01173877	0.01028468	0.01257933
2	2_189926228_TA_T	189926228	0	126	T	TA	0.067	-0.263451	0.1306856	0.04600566	0.04216011	0.04605993
2	2_190541861_G_T	190541861	0	126	T	G	0.151	-0.1827792	0.09161245	0.04825662	0.0442911	0.04823961
2	2_190569908_G_A	190569908	0	126	A	G	0.02	-0.4790356	0.2264824	0.03645463	0.03315651	0.03680069
2	2_190593168_ATTTTT_A	190593168	0	126	A	ATTTTT	0.21	-0.1554543	0.07261463	0.03427872	0.03111506	0.03468771
2	2_191155233_TA_T	191155233	0	126	T	TA	0.087	0.2861075	0.1174717	0.01631521	0.01445192	0.01712542
2	2_191875035_C_T	191875035	0	126	T	C	0.155	-0.165967	0.08226277	0.04583533	0.04199899	0.04589496
2	2_192701301_G_T	192701301	0	126	T	G	0.012	0.5645589	0.2908408	0.05454902	0.05026406	0.0543299
2	2_192818608_C_A	192818608	0	126	A	C	0.028	-0.5093592	0.1907757	0.008620184	0.007474593	0.009442019
2	2_196651955_C_A	196651955	0	126	A	C	0.016	-0.5279624	0.2544095	0.04006528	0.03655243	0.04030356
2	2_196866433_A_C	196866433	0	126	C	A	0.016	-0.5279624	0.2544095	0.04006528	0.03655243	0.04030356
2	2_197208366_C_T	197208366	0	126	T	C	0.06	0.2963276	0.1360599	0.03133571	0.02836048	0.03182677
2	2_198272710_T_C	198272710	0	126	C	T	0.012	0.565477	0.2908363	0.05415936	0.04989354	0.05395285
2	2_198404929_C_G	198404929	0	126	G	C	0.032	-0.371802	0.1809656	0.04205855	0.03843135	0.04223588
2	2_198571890_G_T	198571890	0	126	T	G	0.012	0.5796201	0.2961572	0.05261519	0.04842601	0.05245854
2	2_200323497_A_C	200323497	0	126	C	A	0.052	0.3243105	0.1457565	0.0279184	0.02517233	0.02849924
2	2_201171014_G_C	201171014	0	126	C	G	0.421	-0.1381831	0.06336387	0.03111771	0.02815675	0.03161469
2	2_201171191_C_G	201171191	0	126	G	C	0.393	-0.1361666	0.06433984	0.0363458	0.03305432	0.03669505
2	2_201171207_G_C	201171207	0	126	C	G	0.421	-0.1381831	0.06336387	0.03111771	0.02815675	0.03161469
2	2_201354935_C_G	201354935	0	126	G	C	0.401	0.1716629	0.05910727	0.004371306	0.003704359	0.005067154
2	2_201397724_G_A	201397724	0	126	A	G	0.103	0.2925334	0.1087718	0.008159623	0.007062183	0.0089747
2	2_201445314_G_A	201445314	0	126	A	G	0.107	0.3071091	0.1065868	0.004680363	0.003975473	0.005391737
2	2_201469625_G_A	201469625	0	126	A	G	0.091	0.338035	0.1128027	0.00330707	0.002776012	0.003937012
2	2_201485572_A_G	201485572	0	126	G	A	0.361	0.1395258	0.06774134	0.04155586	0.03795723	0.04174864
2	2_201485830_G_A	201485830	0	126	A	G	0.123	-0.242795	0.1019876	0.01883097	0.01675988	0.01960558
2	2_201505953_C_T	201505953	0	126	T	C	0.218	0.1525251	0.07575037	0.04626006	0.04240079	0.0463063
2	2_201722832_A_G	201722832	0	126	G	A	0.012	0.5652549	0.2908372	0.05425327	0.04998283	0.05404372
2	2_201726353_C_T	201726353	0	126	T	C	0.02	0.5517993	0.2254409	0.01580276	0.01398316	0.01661884
2	2_201736112_T_C	201736112	0	126	C	T	0.115	0.2936014	0.1016977	0.004601851	0.003906541	0.005309412
2	2_201736166_A_C	201736166	0	126	C	A	0.115	0.2936014	0.1016977	0.004601851	0.003906541	0.005309412
2	2_201749975_T_C	201749975	0	126	C	T	0.028	-0.5101658	0.1907347	0.008504515	0.007370947	0.009324768
2	2_201768238_C_T	201768238	0	126	T	C	0.234	0.204096	0.0791952	0.01115303	0.00975477	0.01199312
2	2_201785657_T_C	201785657	0	126	C	T	0.155	0.2779259	0.09576286	0.004397857	0.003727625	0.005095094
2	2_201785837_G_A	201785837	0	126	A	G	0.155	0.2779259	0.09576286	0.004397857	0.003727625	0.005095094
2	2_201881677_A_G	201881677	0	126	G	A	0.155	0.2779259	0.09576286	0.004397857	0.003727625	0.005095094
2	2_201994540_C_T	201994540	0	126	T	C	0.139	0.2494834	0.09977534	0.01373034	0.01209265	0.0145643
2	2_202073790_C_A	202073790	0	126	A	C	0.016	-0.4991991	0.2523402	0.05015074	0.04608665	0.05007327
2	2_202122956_T_C	202122956	0	126	C	T	0.052	0.4141263	0.143116	0.004511892	0.003827608	0.005214977
2	2_202149589_G_C	202149589	0	126	C	G	0.135	-0.1927872	0.09605068	0.04694494	0.04304895	0.04696955
2	2_202151113_C_T	202151113	0	126	T	C	0.016	0.5814594	0.2525708	0.02302096	0.02062545	0.0237164
2	2_202151140_T_G	202151140	0	126	G	T	0.135	-0.1927872	0.09605068	0.04694494	0.04304895	0.04696955
2	2_202154200_C_T	202154200	0	126	T	C	0.135	-0.1927872	0.09605068	0.04694494	0.04304895	0.04696955
2	2_202211443_C_T	202211443	0	126	T	C	0.587	0.208138	0.06121655	0.0009111315	0.0007317064	0.001257977
2	2_202213061_C_G	202213061	0	126	G	C	0.167	-0.2395897	0.08170285	0.004017367	0.003394664	0.004693604
2	2_202215409_C_CAAAACAAAACAAAACAA	202215409	0	126	CAAAACAAAACAAAACAA	C	0.579	0.2046445	0.06093193	0.001045713	0.0008437894	0.001418333
2	2_202215492_C_G	202215492	0	126	G	C	0.611	0.1768578	0.06361587	0.006296392	0.005402113	0.007069584
2	2_202245244_A_G	202245244	0	126	G	A	0.647	0.19203	0.0626585	0.00268263	0.002235817	0.003262255
2	2_202245944_TAA_T	202245944	0	126	T	TAA	0.659	0.2116992	0.06382473	0.001199686	0.0009726269	0.001599302
2	2_202245955_A_G	202245955	0	126	G	A	0.647	0.19203	0.0626585	0.00268263	0.002235817	0.003262255
2	2_202248788_T_C	202248788	0	126	C	T	0.647	0.19203	0.0626585	0.00268263	0.002235817	0.003262255
2	2_202248979_T_A	202248979	0	126	A	T	0.647	0.19203	0.0626585	0.00268263	0.002235817	0.003262255
2	2_202252539_G_A	202252539	0	126	A	G	0.325	-0.176715	0.06652067	0.00895028	0.00777063	0.009776223
2	2_202254288_A_AC	202254288	0	126	AC	A	0.647	0.19203	0.0626585	0.00268263	0.002235817	0.003262255
2	2_202264156_C_T	202264156	0	126	T	C	0.647	0.19203	0.0626585	0.00268263	0.002235817	0.003262255
2	2_202285100_A_G	202285100	0	126	G	A	0.667	0.1877711	0.06658129	0.005603611	0.00478881	0.006353836
2	2_202337730_A_G	202337730	0	126	G	A	0.647	0.1872957	0.06511802	0.004751086	0.004037599	0.005465819
2	2_202342402_G_T	202342402	0	126	T	G	0.579	0.1730376	0.06268167	0.006661094	0.005725897	0.007444583
2	2_202342737_A_G	202342737	0	126	G	A	0.627	0.1986932	0.06261604	0.001908111	0.001571855	0.002407721
2	2_202342802_T_C	202342802	0	126	C	T	0.325	-0.176715	0.06652067	0.00895028	0.00777063	0.009776223
2	2_202352649_A_G	202352649	0	126	G	A	0.421	-0.1610071	0.0641254	0.01335335	0.01174972	0.01418944
2	2_202979369_G_GACA	202979369	0	126	GACA	G	0.492	-0.1328403	0.06208377	0.03437108	0.03120163	0.03477743
2	2_203165101_AT_A	203165101	0	126	A	AT	0.016	-0.5272574	0.2544409	0.04035155	0.03682211	0.04058114
2	2_203990789_T_G	203990789	0	126	G	T	0.111	0.1892261	0.09784717	0.05544204	0.05111354	0.05519401
2	2_203992707_T_G	203992707	0	126	G	T	0.091	0.2483784	0.1082419	0.02346165	0.02103341	0.02414762
2	2_204073414_A_G	204073414	0	126	G	A	0.095	0.2179762	0.1071696	0.04412663	0.04038373	0.04423983
2	2_204594512_T_C	204594512	0	126	C	T	0.198	-0.1899662	0.08002091	0.01915916	0.01706173	0.01992838
2	2_206364737_T_C	206364737	0	126	C	T	0.373	-0.1975515	0.06665364	0.003654305	0.003077941	0.004308143
2	2_206364791_C_G	206364791	0	126	G	C	0.595	0.1621139	0.06502636	0.01400543	0.01234308	0.0148376
2	2_207634958_G_A	207634958	0	126	A	G	0.02	-0.478656	0.2264962	0.0366118	0.03330412	0.03695324
2	2_208693261_C_G	208693261	0	126	G	C	0.643	0.1336658	0.06363186	0.03773419	0.03435882	0.03804249
2	2_209358027_C_T	209358027	0	126	T	C	0.813	0.1579888	0.07757953	0.04386723	0.04013868	0.04398852
2	2_210698785_C_T	210698785	0	126	T	C	0.016	0.5359076	0.2516953	0.03524831	0.03202424	0.03562946
2	2_210704227_A_G	210704227	0	126	G	A	0.048	0.4103277	0.1371114	0.003348009	0.002811556	0.003980905
2	2_210849524_CT_C	210849524	0	126	C	CT	0.06	-0.305306	0.1359314	0.02650155	0.02385405	0.02711748
2	2_210882135_A_C	210882135	2	124	C	A	0.06	-0.3309457	0.1371074	0.01727466	0.01533085	0.01807257
2	2_211444533_GGT_G	211444533	0	126	G	GGT	0.115	-0.2056701	0.1052264	0.05292382	0.04871921	0.05275721
2	2_211521242_TG_T	211521242	0	126	T	TG	0.032	-0.3633033	0.1813035	0.04730241	0.04338736	0.0473157
2	2_212569983_G_A	212569983	0	126	A	G	0.611	0.137631	0.05945058	0.0222812	0.01994118	0.0229921
2	2_212587321_G_A	212587321	0	126	A	G	0.54	-0.1275037	0.06334347	0.04632716	0.04246428	0.04637129
2	2_212589986_T_C	212589986	0	126	C	T	0.353	0.1264288	0.06523034	0.05491026	0.05060763	0.05467945
2	2_215645255_G_C	215645255	0	126	C	G	0.016	-0.5277166	0.2544202	0.04016471	0.0366461	0.04039998
2	2_215661724_CAT_C	215661724	0	126	C	CAT	0.016	-0.5277166	0.2544202	0.04016471	0.0366461	0.04039998
2	2_215661911_A_C	215661911	0	126	C	A	0.044	-0.3151325	0.1564559	0.04618857	0.04233316	0.04623708
2	2_215813900_T_A	215813900	0	126	A	T	0.056	-0.2857261	0.1473267	0.05476049	0.05046518	0.05453453
2	2_215819853_T_C	215819853	0	126	C	T	0.06	-0.3077166	0.1418129	0.03195423	0.02893874	0.03242836
2	2_215831743_T_C	215831743	0	126	C	T	0.06	-0.3077166	0.1418129	0.03195423	0.02893874	0.03242836
2	2_215910724_T_G	215910724	0	126	G	T	0.02	0.5842176	0.2628538	0.02808568	0.02532811	0.02866229
2	2_215910786_T_C	215910786	0	126	C	T	0.02	0.5842176	0.2628538	0.02808568	0.02532811	0.02866229
2	2_215910787_G_A	215910787	0	126	A	G	0.02	0.5842176	0.2628538	0.02808568	0.02532811	0.02866229
2	2_216211655_C_G	216211655	0	126	G	C	0.032	0.4396939	0.1799034	0.01595325	0.01412077	0.01676765
2	2_216810468_A_C	216810468	0	126	C	A	0.365	0.2091983	0.06214206	0.001018784	0.0008213205	0.001386422
2	2_216811707_G_T	216811707	0	126	T	G	0.595	0.1162168	0.05972098	0.05395457	0.04969884	0.05375468
2	2_217363597_C_T	217363597	0	126	T	C	0.02	-0.4808211	0.2264256	0.03572935	0.03247561	0.03609657
2	2_217363638_G_A	217363638	0	126	A	G	0.02	-0.4808211	0.2264256	0.03572935	0.03247561	0.03609657
2	2_217363673_A_G	217363673	0	126	G	A	0.02	-0.4808211	0.2264256	0.03572935	0.03247561	0.03609657
2	2_217525243_T_C	217525243	0	126	C	T	0.056	0.2941363	0.142443	0.0410472	0.03747766	0.04125557
2	2_217526521_C_T	217526521	0	126	T	C	0.052	0.348906	0.1457038	0.01815926	0.01614261	0.0189444
2	2_217526760_T_G	217526760	0	126	G	T	0.016	0.5298411	0.2543942	0.03936252	0.03589069	0.03962207
2	2_217528609_A_G	217528609	0	126	G	A	0.056	0.2939435	0.1424494	0.04118669	0.03760915	0.04139079
2	2_217541426_C_T	217541426	0	126	T	C	0.052	0.348906	0.1457038	0.01815926	0.01614261	0.0189444
2	2_217541437_G_A	217541437	0	126	A	G	0.052	0.348906	0.1457038	0.01815926	0.01614261	0.0189444
2	2_217543541_T_C	217543541	0	126	C	T	0.06	0.2750197	0.1291368	0.03520727	0.03198574	0.03558961
2	2_217543633_G_A	217543633	0	126	A	G	0.052	0.348906	0.1457038	0.01815926	0.01614261	0.0189444
2	2_218712306_C_T	218712306	0	126	T	C	0.31	-0.1723316	0.06802313	0.01256289	0.01103169	0.01340215
2	2_218712606_G_A	218712606	0	126	A	G	0.31	-0.1723316	0.06802313	0.01256289	0.01103169	0.01340215
2	2_218712726_A_G	218712726	0	126	G	A	0.31	-0.1723316	0.06802313	0.01256289	0.01103169	0.01340215
2	2_218712936_C_T	218712936	0	126	T	C	0.31	-0.1723316	0.06802313	0.01256289	0.01103169	0.01340215
2	2_218713282_G_A	218713282	0	126	A	G	0.306	-0.1636739	0.06810191	0.01775046	0.01576731	0.01854166
2	2_218759674_G_C	218759674	0	126	C	G	0.115	0.2067433	0.09667554	0.03446758	0.03129209	0.03487117
2	2_218940418_C_T	218940418	0	126	T	C	0.115	-0.2063209	0.1051788	0.05208416	0.04792164	0.05194461
2	2_219140288_G_C	219140288	0	126	C	G	0.425	0.1305619	0.06278732	0.03967235	0.03618239	0.03992254
2	2_219142594_C_T	219142594	0	126	T	C	0.425	0.1305619	0.06278732	0.03967235	0.03618239	0.03992254
2	2_219142773_C_T	219142773	0	126	T	C	0.571	-0.1248501	0.06327515	0.0507416	0.04664721	0.0506452
2	2_219143229_G_A	219143229	0	126	A	G	0.425	0.1305619	0.06278732	0.03967235	0.03618239	0.03992254
2	2_219143327_T_C	219143327	0	126	C	T	0.425	0.1305619	0.06278732	0.03967235	0.03618239	0.03992254
2	2_219144089_G_A	219144089	0	126	A	G	0.425	0.1305619	0.06278732	0.03967235	0.03618239	0.03992254
2	2_219144149_G_A	219144149	0	126	A	G	0.425	0.1305619	0.06278732	0.03967235	0.03618239	0.03992254
2	2_219146607_T_C	219146607	0	126	C	T	0.425	0.1305619	0.06278732	0.03967235	0.03618239	0.03992254
2	2_219146803_G_A	219146803	0	126	A	G	0.512	-0.119567	0.06035379	0.04982924	0.04578173	0.04976206
2	2_219146868_T_C	219146868	0	126	C	T	0.425	0.1305619	0.06278732	0.03967235	0.03618239	0.03992254
2	2_219146882_G_C	219146882	0	126	C	G	0.425	0.1305619	0.06278732	0.03967235	0.03618239	0.03992254
2	2_219602754_C_T	219602754	0	126	T	C	0.016	0.536431	0.2516944	0.03507238	0.03185921	0.03545861
2	2_219694794_G_A	219694794	0	126	A	G	0.032	-0.3630305	0.181315	0.04748002	0.04355553	0.04748768
2	2_219846328_C_A	219846328	0	126	A	C	0.024	-0.4853064	0.2075699	0.02101307	0.01876991	0.0217491
2	2_219846749_G_A	219846749	0	126	A	G	0.02	-0.4793419	0.2264717	0.03632857	0.03303814	0.03667832
2	2_219847015_G_C	219847015	0	126	C	G	0.02	-0.4793419	0.2264717	0.03632857	0.03303814	0.03667832
2	2_220285182_C_A	220285182	0	126	A	C	0.06	0.3300482	0.125801	0.009812002	0.00854511	0.01064605
2	2_220342004_G_A	220342004	0	126	A	G	0.067	-0.3149043	0.1139834	0.006620082	0.005689457	0.00740247
2	2_220353161_G_C	220353161	0	126	C	G	0.067	-0.3542544	0.1212004	0.004134463	0.003497025	0.004817418
2	2_220354542_G_A	220354542	0	126	A	G	0.067	-0.3542544	0.1212004	0.004134463	0.003497025	0.004817418
2	2_220356632_C_T	220356632	0	126	T	C	0.067	-0.2922321	0.1216239	0.01777893	0.01579344	0.01856972
2	2_220361070_TC_T	220361070	0	126	T	TC	0.067	-0.2922321	0.1216239	0.01777893	0.01579344	0.01856972
2	2_220361590_T_TA	220361590	0	126	TA	T	0.063	-0.3412402	0.1250547	0.00729785	0.00629261	0.00809672
2	2_220404615_C_T	220404615	0	126	T	C	0.016	0.6188549	0.2562232	0.01720579	0.0152677	0.01800463
2	2_220432957_G_A	220432957	0	126	A	G	0.048	0.3101747	0.1503247	0.04119922	0.03762097	0.04140294
2	2_225365109_T_A	225365109	0	126	A	T	0.016	0.5377452	0.2516949	0.03463615	0.03145013	0.03503492
2	2_225659728_G_A	225659728	0	126	A	G	0.02	0.5403326	0.2254646	0.01806952	0.0160602	0.01885601
2	2_228110643_C_T	228110643	0	126	T	C	0.02	-0.5125871	0.2259327	0.02504026	0.02249679	0.02569083
2	2_228113106_G_T	228113106	0	126	T	G	0.02	-0.5125871	0.2259327	0.02504026	0.02249679	0.02569083
2	2_228115847_A_C	228115847	0	126	C	A	0.02	-0.5125871	0.2259327	0.02504026	0.02249679	0.02569083
2	2_228783479_C_A	228783479	0	126	A	C	0.306	-0.1341762	0.06664785	0.04629332	0.04243226	0.04633852
2	2_230701501_C_A	230701501	0	126	A	C	0.032	-0.3717235	0.1809693	0.04210527	0.03847542	0.04228115
2	2_231050715_A_G	231050715	0	126	G	A	0.873	-0.210164	0.0985576	0.03497844	0.03177111	0.03536738
2	2_231176163_C_A	231176163	0	126	A	C	0.012	0.6069357	0.2946041	0.0415083	0.03791238	0.04170254
2	2_231176196_G_A	231176196	0	126	A	G	0.087	-0.2953047	0.1152559	0.01161883	0.01017609	0.01245939
2	2_231222499_T_C	231222499	0	126	C	T	0.099	-0.2890609	0.1095739	0.00942495	0.008196953	0.0102558
2	2_231222655_G_T	231222655	0	126	T	G	0.099	-0.2890609	0.1095739	0.00942495	0.008196953	0.0102558
2	2_231222675_T_C	231222675	0	126	C	T	0.099	-0.2890609	0.1095739	0.00942495	0.008196953	0.0102558
2	2_231248261_C_T	231248261	0	126	T	C	0.147	-0.2369138	0.08792399	0.008042674	0.006957581	0.008855834
2	2_231682658_G_A	231682658	0	126	A	G	0.016	-0.498445	0.2523703	0.05052016	0.0464371	0.05043085
2	2_231774844_G_A	231774844	0	126	A	G	0.179	-0.2462106	0.07231814	0.0008974833	0.0007203701	0.001241585
2	2_231775094_C_A	231775094	0	126	A	C	0.095	-0.4188821	0.1098524	0.00021662	0.0001654949	0.0003699516
2	2_231775297_T_G	231775297	0	126	G	T	0.377	-0.1333733	0.06003076	0.02814441	0.02538281	0.02871952
2	2_231940295_CT_C	231940295	0	126	C	CT	0.119	-0.2320588	0.1033606	0.0265604	0.02390876	0.0271749
2	2_232091479_C_T	232091479	0	126	T	C	0.032	0.3990136	0.1919687	0.0397563	0.03626144	0.04000394
2	2_233127979_T_C	233127979	0	126	C	T	0.016	0.5366689	0.2516941	0.03499284	0.03178461	0.03538137
2	2_233243586_C_T	233243586	0	126	T	C	0.071	0.2588891	0.1184323	0.03072724	0.02779196	0.03123475
2	2_233243619_A_AAC	233243619	0	126	AAC	A	0.071	0.2588891	0.1184323	0.03072724	0.02779196	0.03123475
2	2_233243645_C_A	233243645	0	126	A	C	0.071	0.2588891	0.1184323	0.03072724	0.02779196	0.03123475
2	2_233243981_A_T	233243981	0	126	T	A	0.278	-0.1879428	0.06618569	0.005293198	0.004514811	0.006031509
2	2_233244703_T_C	233244703	0	126	C	T	0.071	0.2588891	0.1184323	0.03072724	0.02779196	0.03123475
2	2_233244843_G_A	233244843	0	126	A	G	0.071	0.2588891	0.1184323	0.03072724	0.02779196	0.03123475
2	2_233244930_G_C	233244930	0	126	C	G	0.298	0.1715227	0.0710788	0.01730342	0.01535722	0.01810093
2	2_233245026_G_A	233245026	0	126	A	G	0.071	0.2588891	0.1184323	0.03072724	0.02779196	0.03123475
2	2_233245045_C_T	233245045	0	126	T	C	0.067	0.2364135	0.1215334	0.05404467	0.04978449	0.05384187
2	2_233245210_C_T	233245210	0	126	T	C	0.278	0.2147264	0.08892368	0.01723147	0.01529125	0.01802996
2	2_233245460_C_T	233245460	0	126	T	C	0.02	-0.4761654	0.2331757	0.04329838	0.03960146	0.04343736
2	2_233245532_C_A	233245532	0	126	A	C	0.067	0.2683901	0.1292837	0.03999635	0.03648751	0.04023672
2	2_233271763_C_A	233271763	0	126	A	C	0.071	0.258998	0.1184338	0.03066053	0.02772966	0.03116984
2	2_233272146_G_C	233272146	0	126	C	G	0.071	0.258998	0.1184338	0.03066053	0.02772966	0.03116984
2	2_233272162_G_A	233272162	0	126	A	G	0.333	0.1383126	0.06752709	0.04268094	0.03901861	0.04283906
2	2_233272925_A_G	233272925	0	126	G	A	0.349	0.1438066	0.06444107	0.02746761	0.02475266	0.02805976
2	2_233273207_G_A	233273207	0	126	A	G	0.333	0.1718892	0.06670061	0.01115609	0.009757538	0.01199618
2	2_233273244_C_A	233273244	0	126	A	C	0.444	0.1527521	0.05998946	0.0121313	0.01064028	0.01297152
2	2_233273368_T_G	233273368	0	126	G	T	0.159	0.2587236	0.09089208	0.005187473	0.004421609	0.005921473
2	2_233273613_C_A	233273613	0	126	A	C	0.067	0.2683901	0.1292837	0.03999635	0.03648751	0.04023672
2	2_233274475_C_A	233274475	0	126	A	C	0.071	0.258998	0.1184338	0.03066053	0.02772966	0.03116984
2	2_233344991_T_G	233344991	0	126	G	T	0.437	-0.1274082	0.06332468	0.04642452	0.04255641	0.04646558
2	2_233345249_C_A	233345249	0	126	A	C	0.214	0.1636244	0.07763943	0.03712233	0.03378373	0.03744875
2	2_233346381_GC_G	233346381	0	126	G	GC	0.222	0.1823764	0.0813389	0.0267564	0.02409101	0.02736612
2	2_233347919_C_G	233347919	0	126	G	C	0.444	0.1384515	0.06358255	0.0313671	0.02838982	0.0318573
2	2_233406178_G_A	233406178	0	126	A	G	0.024	0.4042453	0.2090017	0.05540751	0.05108069	0.05516059
2	2_233408458_C_T	233408458	0	126	T	C	0.024	0.4042453	0.2090017	0.05540751	0.05108069	0.05516059
2	2_233413825_G_A	233413825	0	126	A	G	0.024	0.4042453	0.2090017	0.05540751	0.05108069	0.05516059
2	2_233415520_G_A	233415520	0	126	A	G	0.024	0.4042453	0.2090017	0.05540751	0.05108069	0.05516059
2	2_233712226_CACAGCA_CGCA	233712226	0	126	CGCA	CACAGCA	0.575	0.1420826	0.06329886	0.02659389	0.02393989	0.02720757
2	2_234181556_C_A	234181556	0	126	A	C	0.048	0.3101068	0.150324	0.04124182	0.03766113	0.04144423
2	2_234200977_TA_T	234200977	0	126	T	TA	0.048	0.3101068	0.150324	0.04124182	0.03766113	0.04144423
2	2_234227523_A_G	234227523	0	126	G	A	0.722	-0.1471628	0.07005306	0.03772318	0.03434847	0.03803181
2	2_234238254_T_G	234238254	0	126	G	T	0.718	-0.1511247	0.06855945	0.02938025	0.02653471	0.0299235
2	2_234526871_C_G	234526871	0	126	G	C	0.238	-0.1477274	0.07553751	0.05278839	0.04859055	0.05262616
2	2_234702459_T_C	234702459	0	126	C	T	0.567	-0.1464977	0.0606297	0.01716199	0.01522755	0.01796143
2	2_234702520_C_T	234702520	0	126	T	C	0.075	0.2492755	0.1235205	0.04577533	0.04194225	0.04583685
2	2_234703136_T_C	234703136	0	126	C	T	0.575	-0.1567283	0.06262294	0.01364665	0.01201649	0.01448111
2	2_234704318_A_G	234704318	0	126	G	A	0.575	-0.1784606	0.06343022	0.005714029	0.004886399	0.006468238
2	2_234708570_G_A	234708570	0	126	A	G	0.821	-0.1872857	0.08691856	0.03314835	0.03005614	0.03358931
2	2_234738472_G_A	234738472	0	126	A	G	0.567	-0.1471106	0.06171414	0.01867987	0.01662096	0.0194569
2	2_234740758_A_G	234740758	0	126	G	A	0.556	-0.1620788	0.06264143	0.01084278	0.009474464	0.01168211
2	2_234740797_C_CAAAA	234740797	0	126	CAAAA	C	0.556	-0.1620788	0.06264143	0.01084278	0.009474464	0.01168211
2	2_234740798_T_A	234740798	0	126	A	T	0.556	-0.1620788	0.06264143	0.01084278	0.009474464	0.01168211
2	2_234740985_G_A	234740985	0	126	A	G	0.476	-0.1457772	0.06293727	0.02221436	0.0198794	0.02292663
2	2_234740987_C_G	234740987	0	126	G	C	0.556	-0.1620788	0.06264143	0.01084278	0.009474464	0.01168211
2	2_234839404_C_T	234839404	0	126	T	C	0.111	0.1978649	0.1017343	0.05408557	0.04982338	0.05388144
2	2_234916771_AT_A	234916771	0	126	A	AT	0.294	-0.1939543	0.09372807	0.04062653	0.03708119	0.04084774
2	2_234926008_C_T	234926008	0	126	T	C	0.02	0.5778445	0.2274889	0.01233776	0.01082746	0.01317759
2	2_237105055_C_T	237105055	0	126	T	C	0.036	0.4456147	0.1696771	0.009739299	0.008479677	0.0105728
2	2_238243285_G_A	238243285	0	126	A	G	0.091	0.299944	0.1071845	0.005970981	0.005113738	0.006733973
2	2_238253149_G_A	238253149	0	126	A	G	0.091	0.299944	0.1071845	0.005970981	0.005113738	0.006733973
2	2_238253930_A_G	238253930	0	126	G	A	0.091	0.299944	0.1071845	0.005970981	0.005113738	0.006733973
[truncated: 8,001 more rows]
