# Supplementary material for: Genomic Markers Associated with Cytomegalovirus DNAemia in Kidney Transplant Recipients
Source: Viruses. 2023 Nov 8;15(11):2227. doi: 10.3390/v15112227 (PMC10674338; doi:10.3390/v15112227)
Supplement: Supplementary file 1 [file viruses-15-02227-s001.zip › S4_dnaemia.meta_assoc.txt]

MarkerName	Allele1	Allele2	Weight	Zscore	P-value	Direction
11_94533373_C_T			198.0	-2.61	0.009056	--
6_41903798_C_A			126.0	2.182	0.02909	?+
14_67671701_C_T			198.0	-2.403	0.01625	--
8_8655023_C_T			198.0	2.451	0.01424	++
3_142231062_TAA_TA			126.0	2.94	0.003282	?+
5_32071381_G_C			72.0	-2.591	0.009567	-?
17_1787020_T_C			72.0	2.355	0.01854	+?
12_111799681_T_C			72.0	-2.885	0.003919	-?
8_30670163_G_T			72.0	2.274	0.02296	+?
1_52937900_TA_TAA			72.0	2.299	0.02152	+?
4_6384349_TTCTCTCTCTCTCTCTCTCTCTCTC_TTCTCTCTCTCTC			72.0	2.188	0.0287	+?
4_74964830_C_T			198.0	-2.498	0.01248	--
16_88764205_C_T			72.0	2.247	0.02463	+?
5_140188354_C_G			198.0	-2.219	0.02652	--
7_101192542_G_A			198.0	2.354	0.01856	++
12_56411856_C_G			198.0	3.198	0.001384	++
11_60673868_T_C			198.0	2.749	0.005983	++
11_45925755_G_A			198.0	-2.343	0.01915	--
2_237105055_C_T			198.0	2.221	0.02636	++
7_18624867_T_A			126.0	-2.627	0.008607	?-
19_22940046_C_A			198.0	-2.247	0.02465	--
15_44581461_G_A			198.0	-2.936	0.003325	--
17_7193055_GA_G			198.0	2.5	0.01242	++
14_95089867_A_T			72.0	2.796	0.005178	+?
17_53498846_C_T			72.0	-2.824	0.004745	-?
7_75053572_G_A			198.0	2.64	0.008279	++
6_169065126_G_A			72.0	-2.381	0.01724	-?
5_33595996_C_T			198.0	2.229	0.0258	++
19_45862027_T_G			72.0	-2.436	0.01485	-?
8_74782624_TC_AC			72.0	-2.679	0.007379	-?
8_126010805_G_C			72.0	-2.915	0.003554	-?
1_89408887_C_T			72.0	2.279	0.02266	+?
11_18333436_A_T			198.0	-2.224	0.02612	--
7_131241029_GGGCGACGGCGAC_GGGCGAC			72.0	-2.244	0.02481	-?
2_240982257_A_G			198.0	2.612	0.008992	++
1_11737051_G_C			198.0	-2.427	0.01521	--
19_36038390_A_G			198.0	-2.528	0.01148	--
19_7755486_C_T			198.0	2.366	0.01798	++
7_64863392_C_T			198.0	-2.268	0.0233	--
2_179583398_T_C			198.0	-2.217	0.02663	--
3_128974022_CT_C			72.0	2.277	0.02281	+?
5_74675413_CT_C			72.0	-2.171	0.02991	-?
2_242289663_C_CATT			198.0	-2.703	0.006864	--
7_136921062_C_T			72.0	2.182	0.02909	+?
11_104869708_G_C			198.0	2.537	0.01117	++
6_33036290_G_A			72.0	2.313	0.02072	+?
12_98938907_GT_GTTTT			126.0	-2.917	0.003531	?-
11_60070253_G_A			198.0	-2.522	0.01168	--
5_37875682_C_G			198.0	2.212	0.02697	++
13_24895631_T_A			198.0	2.222	0.02627	++
1_230903234_A_G			198.0	2.361	0.0182	-+
22_40574170_T_A			198.0	-2.212	0.02699	--
1_27675858_GGCTC_G			198.0	-2.482	0.01307	--
19_14841913_A_C			198.0	-2.205	0.02747	--
15_102303750_A_T			72.0	2.263	0.02366	+?
16_50349326_T_C			72.0	2.283	0.02245	+?
7_140111509_G_C			72.0	-2.244	0.02485	-?
9_69777408_T_C			72.0	2.639	0.008325	+?
3_12851841_G_A			198.0	2.192	0.02838	++
14_94471213_G_A			198.0	2.202	0.02769	++
10_106037894_T_C			198.0	-3.428	0.000609	--
5_1332030_TCTC_T			198.0	2.57	0.01017	++
6_69772809_T_C			198.0	2.491	0.01274	++
2_15644107_C_A			72.0	3.004	0.002662	+?
3_45715769_T_C			198.0	-2.187	0.02875	--
3_164709837_C_T			72.0	2.68	0.007364	+?
12_48512521_A_C			72.0	2.953	0.003146	+?
2_170633001_C_T			198.0	2.456	0.01407	++
12_48391127_C_T			72.0	2.408	0.01604	+?
20_62319604_A_C			198.0	2.455	0.01407	++
6_32549310_T_G			198.0	-2.21	0.02711	--
11_129940456_C_T			198.0	-2.903	0.003698	--
14_94933709_C_T			198.0	2.34	0.01927	++
9_136645727_A_G			72.0	-2.324	0.0201	-?
4_189061169_C_T			198.0	-2.903	0.003701	--
19_57654217_T_G			72.0	-2.904	0.003689	-?
22_22724135_GT_G			72.0	2.388	0.01692	+?
1_76333172_T_C			198.0	-2.48	0.01313	--
1_158580921_GCACA_GCA			72.0	2.583	0.009789	+?
20_62319464_T_C			198.0	2.455	0.01407	++
10_13735887_C_A			198.0	-2.283	0.02242	--
22_28424932_G_T			198.0	-2.271	0.02312	--
17_7346302_T_C			72.0	2.206	0.02738	+?
14_99870536_A_T			72.0	2.235	0.02543	+?
3_8701430_T_C			72.0	-2.597	0.009416	-?
1_167059462_G_C			198.0	-2.547	0.01087	--
6_97063555_A_G			198.0	2.446	0.01444	++
9_95009786_A_G			72.0	2.205	0.02747	+?
2_217541437_G_A			198.0	3.455	0.0005505	++
6_31110969_C_T			198.0	2.355	0.0185	++
19_14030689_T_C			198.0	2.304	0.02121	++
2_231774844_G_A			198.0	-2.574	0.01005	+-
2_1683923_G_T			198.0	2.43	0.01511	++
17_71232687_T_C			198.0	2.495	0.0126	++
19_7672636_C_A			198.0	-2.234	0.02546	--
7_138601706_C_A			198.0	2.529	0.01145	++
2_239307245_A_G			72.0	2.506	0.0122	+?
22_20708994_C_T			72.0	2.358	0.0184	+?
4_166145153_G_A			72.0	-2.566	0.01029	-?
2_239133672_G_C			72.0	2.698	0.00697	+?
11_8797717_A_G			72.0	2.166	0.03034	+?
19_36015873_G_A			198.0	-2.597	0.009405	--
1_40559831_G_A			72.0	-2.355	0.01854	-?
2_175613021_G_A			72.0	-2.279	0.02269	-?
14_60592280_G_A			198.0	-2.256	0.02408	--
5_145539123_T_A			72.0	2.367	0.01796	+?
7_103207234_T_C			198.0	-2.618	0.008849	--
1_17312592_G_A			198.0	2.376	0.0175	++
11_67235106_G_A			72.0	2.722	0.006492	+?
2_11733134_C_G			198.0	2.953	0.003142	++
16_57786711_C_T			198.0	-2.399	0.01646	--
2_233708806_A_G			198.0	2.327	0.01998	++
15_75586760_A_G			126.0	2.403	0.01628	?+
1_153233701_A_C			198.0	3.062	0.002199	++
12_133253995_G_A			198.0	-2.194	0.02821	--
16_10855521_CT_C			72.0	-2.381	0.01727	-?
14_21895954_A_C			198.0	2.681	0.007332	++
3_195702704_T_C			72.0	-2.449	0.01433	-?
7_155595554_GCCCC_CCCCC			126.0	3.785	0.000154	?+
18_6589556_G_A			72.0	-2.568	0.01024	-?
19_19249379_A_G			72.0	2.425	0.01532	+?
2_179558366_T_C			198.0	-2.572	0.01011	--
19_4557056_A_C			198.0	-3.063	0.002194	--
16_57392853_G_T			198.0	2.516	0.01186	++
15_21369554_A_G			72.0	2.299	0.02148	+?
9_91686097_AC_A			72.0	2.278	0.02274	+?
9_133271489_T_C			72.0	-2.181	0.02915	-?
2_169988946_T_A			72.0	-2.495	0.0126	-?
1_156280671_A_T			198.0	-2.307	0.02106	--
5_176314060_C_G			198.0	-2.458	0.01397	--
16_18882659_GAA_GA			198.0	-2.418	0.01559	--
16_3458219_C_T			72.0	2.516	0.01187	+?
2_113514180_T_C			198.0	-2.196	0.02811	--
12_110874501_ATATAT_AATAT			126.0	-2.163	0.03053	?-
2_8910767_T_A			72.0	2.342	0.01917	+?
4_100268856_A_C			198.0	3.25	0.001153	++
6_33239905_A_G			198.0	-2.387	0.01699	--
9_69424030_T_C			198.0	2.629	0.008565	++
19_10120903_T_C			198.0	2.289	0.02208	++
5_115176589_A_G			72.0	2.423	0.01541	+?
8_71508553_T_C			72.0	2.618	0.008853	+?
3_195254670_CT_C			198.0	-2.562	0.0104	--
9_84248185_GTGT_G			72.0	2.506	0.01222	+?
14_93684814_T_C			198.0	2.234	0.02545	++
16_5050554_C_G			72.0	-2.265	0.02352	-?
11_62009611_C_T			72.0	-2.186	0.02884	-?
3_195392879_C_T			72.0	-2.342	0.01918	-?
16_2987002_C_T			72.0	2.513	0.01196	+?
12_56528385_AT_ATT			72.0	-2.534	0.01127	-?
22_24300683_G_A			198.0	-2.758	0.005811	+-
1_2337194_C_T			198.0	2.166	0.03033	++
6_8064677_G_A			198.0	-2.313	0.02074	--
16_15166891_T_C			198.0	-2.18	0.02926	--
6_52876377_G_A			72.0	2.348	0.01886	+?
3_195690244_C_G			72.0	2.344	0.01909	+?
7_933240_C_CGGT			72.0	-2.231	0.02565	-?
7_70229595_T_G			72.0	2.565	0.01033	+?
12_42737635_T_C			72.0	-2.332	0.01969	-?
1_762320_C_T			72.0	-2.367	0.01791	-?
22_24898310_C_T			198.0	2.632	0.008493	++
1_159002557_A_G			198.0	-2.467	0.01362	--
9_74481994_CA_C			198.0	2.512	0.01202	++
1_248525100_G_A			198.0	-2.183	0.02903	--
11_129306572_C_T			198.0	-2.905	0.003672	--
2_3260822_A_G			72.0	-2.393	0.01673	-?
11_62886319_G_C			198.0	-2.581	0.009843	--
5_21802485_C_A			72.0	2.294	0.02179	+?
2_44080242_A_G			72.0	-2.528	0.01149	-?
19_1268178_G_A			72.0	2.267	0.02337	+?
19_35760930_TG_T			198.0	-3.044	0.002338	--
X_302139_G_C			198.0	-3.75	0.0001766	--
1_233122319_G_A			198.0	2.333	0.01966	++
1_165513463_C_G			198.0	2.569	0.0102	++
12_111804088_T_C			72.0	2.279	0.02266	+?
13_21750662_G_GAGGTCTCTTTTGTGAAGCCTAGACCTCTTTAAAATTTTTTTTTTCTTTCC			126.0	-2.222	0.02626	?-
1_20411234_T_A			72.0	2.441	0.01465	+?
7_150720071_G_A			198.0	-2.584	0.009768	--
16_1657012_C_T			72.0	-2.276	0.02287	-?
8_62371254_T_G			72.0	2.227	0.02592	+?
4_4190526_C_T			126.0	2.496	0.01254	?+
21_14757043_T_C			72.0	2.185	0.02887	+?
14_102718052_G_A			198.0	-2.685	0.007254	--
19_36015491_G_T			72.0	-2.482	0.01306	-?
2_190593168_ATTTTT_A			198.0	-2.801	0.005098	--
8_74203722_G_A			198.0	2.165	0.0304	++
11_71628378_A_G			72.0	2.279	0.02266	+?
16_75258636_G_C			72.0	2.405	0.01619	+?
4_37435524_C_T			198.0	-2.249	0.02451	--
10_72541456_G_T			72.0	-2.236	0.02536	-?
20_17605111_T_G			72.0	2.261	0.02375	+?
2_202245955_A_G			198.0	3.086	0.002027	++
22_41967870_C_T			72.0	-2.884	0.003929	-?
6_167753519_C_T			72.0	2.242	0.02498	+?
2_128263337_T_A			72.0	-2.337	0.01942	-?
8_133144334_TA_T			72.0	-2.74	0.006153	-?
1_201042618_G_A			198.0	-2.196	0.02808	--
12_121450165_C_T			198.0	2.793	0.005225	++
21_43240636_C_T			72.0	-2.263	0.02361	-?
7_49814998_CCCCG_C			126.0	-2.184	0.02898	?-
12_498267_CGGGG_C			72.0	-2.254	0.02422	-?
16_2986894_G_T			72.0	2.299	0.02153	+?
11_62848664_A_C			198.0	2.339	0.01934	++
17_2995994_T_C			198.0	2.377	0.01744	++
13_108183365_CATAT_C			72.0	2.609	0.009088	+?
1_167849658_C_G			198.0	-2.613	0.008975	--
17_79422289_C_T			198.0	-2.403	0.01628	--
1_151554503_T_C			72.0	2.163	0.03052	+?
1_192129667_CTGAT_C			72.0	-2.777	0.005481	-?
2_202213061_C_G			198.0	-3.025	0.002487	--
1_206972072_C_T			72.0	-2.209	0.02721	-?
1_38185337_T_C			198.0	2.192	0.02838	++
8_71033736_G_T			72.0	2.227	0.02592	+?
11_2435956_C_T			198.0	-2.648	0.008097	--
21_41559648_C_A			72.0	-2.528	0.01148	-?
7_155174801_ATGTGAG_A			198.0	-2.174	0.02973	--
7_106710766_G_A			72.0	2.294	0.02179	+?
8_30416431_A_G			72.0	-2.734	0.00625	-?
1_231396485_CA_C			126.0	-2.399	0.01646	?-
3_38080952_T_G			198.0	-2.333	0.01963	--
16_57624549_G_A			198.0	3.398	0.0006787	++
1_111437421_C_A			72.0	3.144	0.001666	+?
2_237074827_C_T			72.0	-2.171	0.0299	-?
1_152187589_G_A			198.0	-2.333	0.01966	--
2_236617869_G_A			72.0	2.338	0.01937	+?
17_65740027_C_T			72.0	2.321	0.02031	+?
1_12855844_G_A			198.0	2.245	0.0248	++
16_51171493_CAG_C			198.0	2.283	0.02243	++
6_89907873_G_A			198.0	2.228	0.02585	++
10_126312289_G_A			72.0	2.27	0.0232	+?
6_108533548_AT_A			72.0	-2.21	0.02711	-?
1_153391786_T_C			198.0	-2.263	0.02361	--
15_35084215_C_G			72.0	-2.283	0.02242	-?
12_126135195_A_G			198.0	2.827	0.004698	-+
8_126443534_G_T			198.0	-2.701	0.006905	--
2_131407782_T_C			72.0	-2.162	0.03064	-?
2_96626292_C_T			198.0	2.714	0.006643	++
6_94120192_G_A			198.0	2.231	0.02568	++
9_36378901_CT_CTT			72.0	-3.455	0.0005502	-?
3_128627753_T_C			198.0	2.233	0.02554	++
8_7340204_A_G			198.0	2.695	0.007032	++
1_229631378_C_A			198.0	-2.259	0.02389	--
X_73068431_A_C			72.0	-2.249	0.0245	-?
12_15713057_A_G			72.0	2.574	0.01005	+?
3_195012941_AT_A			198.0	2.178	0.02942	++
9_43844193_G_A			72.0	2.631	0.00852	+?
3_131271181_G_A			72.0	2.352	0.01868	+?
7_29544468_A_G			198.0	2.754	0.005882	++
3_186570816_T_C			126.0	2.247	0.02466	?+
11_125498872_G_C			72.0	-2.17	0.02998	-?
1_230410342_G_A			72.0	-2.226	0.02601	-?
4_79297177_G_A			72.0	-2.651	0.008033	-?
7_35144518_T_C			72.0	-2.256	0.02409	-?
1_158990247_A_G			198.0	2.758	0.005818	++
2_136561735_G_A			198.0	3.301	0.0009622	++
5_137664241_A_G			198.0	-2.583	0.009785	--
17_40259613_G_C			126.0	-2.646	0.008146	?-
1_152280788_T_G			198.0	-2.362	0.0182	--
1_1354975_G_A			198.0	2.182	0.02912	++
2_54042132_CTTTTTTTTTT_TTTTTTTTTTT			71.0	2.431	0.01508	+?
11_67790278_C_T			198.0	-2.273	0.02304	--
9_124061902_C_T			72.0	2.694	0.007069	+?
10_97602059_A_AT			126.0	2.171	0.02992	?+
12_56478658_A_C			72.0	-2.32	0.02035	-?
10_25140411_G_C			198.0	2.396	0.01657	++
14_95581899_G_A			72.0	2.506	0.01222	+?
17_36059302_T_C			72.0	-2.171	0.02995	-?
14_22192106_A_G			198.0	-2.369	0.01784	--
11_113102349_C_G			126.0	-2.199	0.02788	?-
1_44679675_C_T			72.0	2.611	0.009035	+?
19_54782737_T_C			126.0	2.267	0.02336	?+
19_13341058_G_A			126.0	2.18	0.02926	?+
19_43371906_A_G			72.0	2.285	0.02228	+?
9_42410028_G_A			198.0	2.705	0.006828	++
14_106173524_A_G			72.0	2.257	0.02402	+?
20_62737092_C_A			72.0	-2.305	0.02119	-?
7_2394991_C_T			198.0	2.587	0.009668	++
8_12878807_T_G			198.0	2.514	0.01194	++
14_77796758_C_T			198.0	2.621	0.008778	++
11_67058114_G_A			72.0	-2.366	0.018	-?
3_97869444_A_G			72.0	2.394	0.01664	+?
2_233244930_G_C			198.0	2.341	0.01925	++
8_103225223_A_C			72.0	-2.647	0.008131	-?
19_34003712_C_T			198.0	2.187	0.02876	++
9_73164596_GA_G			198.0	2.968	0.002993	++
4_84223426_T_C			198.0	2.412	0.01586	++
6_89638988_TAA_TA			72.0	2.226	0.02605	+?
11_56015804_G_T			72.0	2.195	0.02817	+?
14_81360893_C_CA			72.0	2.532	0.01136	+?
19_57705281_C_T			72.0	2.227	0.02592	+?
X_73043659_TG_T			72.0	-2.249	0.0245	-?
21_38460247_G_A			72.0	-2.189	0.02861	-?
21_38092072_G_A			198.0	3.075	0.002105	++
1_42915527_C_A			198.0	-2.511	0.01205	--
2_20884586_G_C			198.0	2.862	0.004213	++
5_148578026_C_T			72.0	-2.321	0.02031	-?
3_195395347_G_A			72.0	-2.376	0.01749	-?
Y_13489360_T_A			71.0	2.341	0.01922	+?
1_62231924_T_TTGA			198.0	-2.305	0.02116	--
7_73152599_C_A			72.0	2.207	0.02731	+?
1_18554356_C_T			198.0	2.193	0.02829	++
17_40179589_T_C			198.0	2.188	0.0287	++
7_87011913_T_C			72.0	2.398	0.01648	+?
12_113444543_C_T			72.0	2.302	0.02133	+?
20_61525694_A_G			198.0	-2.565	0.01031	--
9_88842230_TTTTA_TTTTATTTA			72.0	-2.75	0.005954	-?
12_131286119_A_G			72.0	2.6	0.009331	+?
19_22574357_C_G			198.0	-2.531	0.01136	--
6_131936675_ATCAGC_AAGC			72.0	-2.22	0.02643	-?
20_25459764_T_G			198.0	-2.375	0.01753	--
X_100615025_G_T			198.0	2.243	0.02492	++
1_114423653_C_T			72.0	-2.754	0.005881	-?
2_113953657_A_C			198.0	-2.739	0.006162	--
X_69713176_GT_G			72.0	-2.563	0.01039	-?
6_32489671_A_G			198.0	2.719	0.006542	++
7_150706383_C_A			198.0	-3.422	0.000622	--
12_48499931_A_T			72.0	2.398	0.0165	+?
12_80613570_CT_C			198.0	-2.707	0.006788	--
22_19279194_G_T			198.0	-2.812	0.004916	--
1_3743132_T_C			72.0	-2.177	0.02947	-?
12_123200247_G_C			198.0	2.171	0.02993	++
7_66098043_CA_C			72.0	-2.223	0.02625	-?
5_90012614_A_T			198.0	2.246	0.02473	++
6_49494693_G_C			198.0	2.198	0.02797	++
X_130420006_T_C			72.0	2.561	0.01043	+?
19_8111599_CTCCTCCTCCTCCCCA_C			72.0	2.254	0.02417	+?
7_94035433_C_T			72.0	-2.862	0.004211	-?
15_59972368_G_T			72.0	2.186	0.0288	+?
10_27538204_T_C			72.0	-2.261	0.02376	-?
11_1020268_G_A			198.0	-2.277	0.02281	--
9_119094789_A_C			198.0	2.414	0.01576	++
19_51890765_G_A			198.0	2.512	0.01199	++
12_3736990_A_C			72.0	2.414	0.01576	+?
3_141163045_T_C			198.0	-2.229	0.02579	--
12_21196411_A_G			72.0	2.571	0.01013	+?
7_30694961_C_T			72.0	-2.223	0.02622	-?
5_176936590_T_C			198.0	-2.437	0.0148	--
17_58037413_T_C			198.0	-2.542	0.01103	--
14_55818517_T_A			198.0	2.193	0.02831	++
19_6710584_GGAGA_GGA			72.0	-2.656	0.007897	-?
10_54531534_G_A			72.0	2.213	0.02687	+?
12_121434833_G_A			198.0	2.566	0.01028	++
4_79462356_G_T			72.0	-2.311	0.02082	-?
9_37860258_G_C			198.0	2.197	0.02804	++
12_51736596_AT_ATT			72.0	2.257	0.02399	+?
2_130932671_TTA_T			72.0	2.294	0.02179	+?
18_44424100_G_A			72.0	2.431	0.01505	+?
7_151273594_CT_C			198.0	-2.221	0.02634	--
1_152284854_A_G			198.0	-2.376	0.01751	--
12_71526709_C_T			72.0	2.344	0.01906	+?
11_116641028_C_T			72.0	-2.944	0.003238	-?
19_1219274_G_A			198.0	-2.184	0.02893	--
2_131369168_G_A			126.0	-2.256	0.02407	?-
2_15744484_CT_C			72.0	-2.598	0.009383	-?
8_23174653_T_TG			198.0	2.303	0.02128	++
17_71233130_A_G			198.0	2.495	0.0126	++
1_220307676_A_G			198.0	2.647	0.008115	++
11_123814489_A_G			198.0	-2.258	0.02393	--
4_997488_G_T			198.0	2.368	0.01787	++
10_3160917_T_C			198.0	2.249	0.02451	++
11_2427400_C_T			198.0	-2.373	0.01763	--
5_1442987_G_A			198.0	-2.401	0.01636	--
2_131414878_A_C			198.0	2.802	0.005083	++
2_113956371_G_C			198.0	-2.739	0.006162	--
12_20864451_T_A			198.0	2.404	0.01621	++
11_723311_C_T			198.0	-3.197	0.001387	--
19_49845895_C_T			198.0	2.301	0.02137	++
6_32709586_G_A			72.0	-2.211	0.02706	-?
5_149200043_T_C			198.0	2.534	0.01127	++
10_29839798_A_G			198.0	-2.582	0.009811	--
6_132271761_G_C			72.0	2.272	0.02309	+?
1_3753063_G_T			72.0	2.289	0.02208	+?
4_100258007_T_C			198.0	3.616	0.000299	++
19_57650239_A_T			72.0	-2.384	0.01711	-?
2_89156948_C_G			198.0	3.278	0.001047	++
3_169981058_G_A			72.0	2.347	0.01892	+?
15_45404066_G_A			198.0	-2.874	0.004049	--
8_134262599_T_C			72.0	2.279	0.02265	+?
2_44080310_C_T			72.0	-2.176	0.02952	-?
X_27765399_AGAGGAGGAGGAGGAGGAG_AGAGGAG			72.0	-2.579	0.009918	-?
19_48183114_A_G			198.0	2.177	0.02948	++
1_109643255_G_T			72.0	-2.595	0.009457	-?
16_11940764_T_C			198.0	-2.404	0.01623	--
22_31346325_AC_AACC			72.0	2.212	0.02694	+?
9_136339181_C_T			198.0	-2.605	0.009186	--
14_105615648_C_T			198.0	2.549	0.01079	++
14_101439916_T_G			72.0	-2.225	0.0261	-?
6_33269350_CAA_CA			72.0	-2.437	0.01482	-?
11_3150169_G_T			72.0	-2.495	0.01259	-?
19_7703605_C_T			198.0	2.269	0.02328	++
12_105432019_ATCTC_ATC			72.0	-2.251	0.02437	-?
3_195710971_G_T			72.0	-2.376	0.01749	-?
5_147585531_A_C			72.0	2.248	0.02457	+?
9_36864066_G_A			72.0	2.24	0.02512	+?
19_21120153_A_G			72.0	2.42	0.01552	+?
22_29908025_G_A			72.0	2.357	0.0184	+?
20_61524384_CTT_C			126.0	2.411	0.01592	?+
19_1272040_T_C			198.0	3.232	0.001231	++
17_4801970_G_A			198.0	-2.205	0.02745	--
11_130715918_A_AT			72.0	2.509	0.0121	+?
6_32727097_C_A			72.0	-2.524	0.0116	-?
12_11421093_T_TGGG			198.0	-2.818	0.004829	--
20_47342814_G_A			198.0	2.634	0.008443	-+
22_37196680_C_T			72.0	2.382	0.01721	+?
12_56492739_CTT_C			126.0	-2.338	0.01936	?-
1_201752429_A_C			72.0	2.653	0.007978	+?
2_136614255_G_A			198.0	-3.564	0.0003648	--
7_74004955_T_C			72.0	-2.477	0.01325	-?
14_55847525_C_A			72.0	2.511	0.01204	+?
5_55412471_C_T			198.0	-2.43	0.0151	--
15_40032060_C_T			72.0	2.294	0.02179	+?
1_17657616_T_C			198.0	-2.266	0.02345	--
1_155029253_A_C			72.0	-2.319	0.02042	-?
11_67789138_C_T			198.0	-2.522	0.01166	--
6_20758943_G_T			198.0	2.41	0.01595	++
2_130949635_G_C			72.0	2.294	0.02179	+?
11_46939747_C_A			72.0	2.247	0.02463	+?
15_20773788_A_G			72.0	2.747	0.006012	+?
19_50475077_C_T			72.0	-2.406	0.01612	-?
7_75889151_G_GC			198.0	2.524	0.0116	++
2_71047009_CCA_C			72.0	2.218	0.02658	+?
11_45713130_CCTCTCTCTCTCTCT_CCTCTCTCTCT			72.0	-2.207	0.0273	-?
15_43132840_C_T			72.0	-2.281	0.02257	-?
12_50174313_A_T			72.0	2.282	0.02252	+?
10_20436838_G_C			198.0	2.636	0.008391	++
9_130587907_C_CG			198.0	2.543	0.011	++
2_96681081_C_T			72.0	2.322	0.02023	+?
10_46342667_CGCTCCTGCCATCCTGTCCCCA_C			198.0	2.921	0.00349	++
16_10637690_G_A			72.0	2.612	0.009006	+?
3_75680079_G_T			72.0	2.236	0.02533	+?
6_110752126_T_C			72.0	-3.123	0.001791	-?
19_41129842_C_T			198.0	-3.177	0.00149	--
17_10400522_C_T			198.0	2.256	0.02404	++
5_169031150_T_C			198.0	2.638	0.008343	++
19_43882832_A_C			72.0	-3.188	0.001433	-?
5_80502736_C_G			198.0	-2.446	0.01446	--
3_132196761_G_A			198.0	-2.447	0.0144	--
22_42273462_G_A			198.0	-2.196	0.02808	--
8_145161823_G_A			198.0	2.216	0.02667	++
1_202288462_C_A			72.0	2.598	0.009377	+?
4_2179074_A_G			72.0	2.754	0.005892	+?
2_233395974_GGGACCCTCTAGGACCGGTGCCCCAAGGTCACAGCT_G			72.0	-2.181	0.02919	-?
6_130530815_C_T			198.0	-2.435	0.01489	--
4_79440589_C_T			126.0	-2.485	0.01294	?-
21_19618329_C_G			72.0	2.294	0.02179	+?
5_171760569_A_G			72.0	-2.217	0.02665	-?
14_106994008_TGC_T			72.0	-2.603	0.009238	-?
9_113550168_T_C			198.0	2.185	0.0289	++
10_61965625_A_G			198.0	2.837	0.004549	++
1_67160981_C_T			198.0	-2.4	0.01639	--
2_238454152_ACC_A			198.0	-2.193	0.02829	--
19_10370252_G_C			126.0	-2.226	0.02601	?-
1_13474974_G_A			198.0	2.828	0.00468	++
11_55747079_G_A			72.0	2.665	0.007693	+?
1_16911937_C_G			72.0	2.531	0.01138	+?
2_132290464_G_A			198.0	-2.724	0.006456	--
12_51497573_T_C			198.0	2.266	0.02343	++
15_28386626_C_T			198.0	2.377	0.01743	++
5_69805381_C_T			72.0	2.673	0.007508	+?
2_233392020_AAGAG_AAG			72.0	2.733	0.006271	+?
22_18064010_CGT_C			72.0	-2.215	0.02673	-?
19_44564981_G_A			198.0	2.311	0.02083	++
4_437831_C_T			198.0	2.443	0.01457	++
14_94467633_G_A			72.0	2.279	0.02266	+?
16_4562351_T_C			72.0	2.161	0.03073	+?
4_129960107_T_C			72.0	2.262	0.02367	+?
4_88362904_C_T			72.0	-2.19	0.02852	-?
15_60715800_T_G			198.0	2.896	0.003776	++
5_41158967_A_G			72.0	-2.54	0.01108	-?
16_57071375_T_C			72.0	-2.202	0.02763	-?
17_3568012_A_G			198.0	-2.226	0.02602	--
19_36399346_C_T			72.0	2.229	0.02582	+?
X_13765123_G_A			198.0	2.332	0.01972	++
2_102645013_G_GT			72.0	2.198	0.02794	+?
19_36395727_C_T			72.0	2.229	0.02582	+?
1_144880832_T_C			198.0	2.746	0.006033	++
2_44079310_C_A			72.0	-2.308	0.02098	-?
6_167275486_T_G			72.0	-2.225	0.02606	-?
10_135001941_C_T			72.0	-2.538	0.01116	-?
1_236914738_ATTGT_A			198.0	-2.441	0.01465	--
12_10041450_G_A			198.0	2.387	0.01697	++
8_101629772_C_T			72.0	2.536	0.01122	+?
19_56443468_A_G			72.0	-2.249	0.0245	-?
19_35790826_T_C			126.0	2.174	0.0297	?+
22_29927241_G_GT			72.0	2.684	0.007281	+?
12_40876977_GAAC_G			72.0	-2.509	0.0121	-?
16_72011193_A_C			198.0	-2.465	0.01372	--
1_1421916_T_C			198.0	2.445	0.01447	++
3_97868529_G_A			72.0	2.394	0.01664	+?
9_69113031_G_A			72.0	2.243	0.02488	+?
10_97919839_A_T			198.0	2.594	0.009491	++
6_29364815_C_G			198.0	2.229	0.02581	++
1_173516871_G_C			198.0	2.161	0.0307	++
17_48440467_TA_TAA			72.0	-2.642	0.008243	-?
5_118280395_T_C			126.0	2.27	0.02323	?+
5_149755744_G_C			198.0	-2.93	0.003389	--
11_56230678_G_A			198.0	2.328	0.01994	++
19_55014088_C_T			198.0	2.26	0.0238	++
16_57849280_G_C			198.0	2.218	0.02652	++
12_13526328_G_T			198.0	2.493	0.01268	++
2_141812617_C_T			198.0	2.361	0.01823	++
20_61441035_G_A			198.0	-2.327	0.01997	--
20_1291018_G_A			198.0	2.617	0.008864	++
12_88178418_G_A			72.0	2.672	0.00753	+?
3_7621093_T_A			198.0	2.328	0.0199	-+
8_25247821_TAA_T			198.0	-2.41	0.01596	--
20_47244523_A_G			198.0	2.666	0.007682	++
X_114426385_G_A			198.0	-2.212	0.02698	--
3_124436308_C_T			72.0	2.357	0.0184	+?
2_110849222_G_A			198.0	2.391	0.0168	++
6_28198828_C_T			72.0	-2.18	0.02924	-?
19_45021252_G_A			198.0	-2.289	0.02209	--
2_20234523_C_T			72.0	-2.276	0.02284	-?
19_55668397_C_T			198.0	-2.359	0.01835	--
18_45394919_T_C			72.0	2.389	0.01689	+?
9_133271485_A_C			72.0	-2.667	0.007661	-?
1_67109410_T_TTGTG			198.0	-2.584	0.009772	--
14_105722913_G_A			198.0	-2.207	0.0273	--
17_73585996_T_C			126.0	2.536	0.01122	?+
14_37203697_G_A			198.0	-2.274	0.02299	--
4_74021289_AATC_A			198.0	-2.365	0.01804	--
2_120059988_T_C			198.0	-2.498	0.0125	--
11_67810341_A_G			198.0	-2.546	0.01089	--
19_107175_C_T			72.0	2.187	0.02872	+?
1_91782011_G_A			198.0	-2.998	0.00272	--
2_192818608_C_A			126.0	-2.627	0.00862	?-
13_51922947_T_C			72.0	2.24	0.02512	+?
14_88945407_C_G			198.0	2.176	0.02958	++
10_46970520_C_A			198.0	2.653	0.007972	++
19_46142637_C_G			198.0	-2.304	0.02125	--
20_4158400_G_C			72.0	-2.756	0.005843	-?
7_120454487_C_T			72.0	2.664	0.007728	+?
6_133852245_G_A			72.0	-2.28	0.02261	-?
17_7192091_C_T			198.0	2.407	0.0161	++
9_136906986_T_G			198.0	-2.853	0.004334	--
1_38483296_AT_A			198.0	-2.292	0.0219	--
13_36141009_G_A			198.0	-2.55	0.01078	--
15_20777759_C_T			72.0	2.52	0.01175	+?
21_14771327_TC_T			72.0	-2.238	0.02523	-?
10_135352514_A_G			198.0	2.299	0.02149	++
11_65767249_C_T			72.0	-2.177	0.02948	-?
19_24062767_A_G			72.0	-3.108	0.001881	-?
22_20104370_A_C			72.0	-2.668	0.007634	-?
9_5090641_G_A			198.0	2.764	0.005711	++
4_102946671_GT_G			198.0	3.0	0.002703	++
18_28908090_G_A			198.0	-3.541	0.0003981	--
11_798254_C_A			198.0	-2.395	0.0166	--
6_32552279_ACGC_A			72.0	-2.248	0.02457	-?
12_3724757_C_T			72.0	2.228	0.02586	+?
2_136633962_G_A			198.0	3.115	0.00184	++
11_67023069_C_G			72.0	2.38	0.01732	+?
16_10729569_C_G			72.0	-2.518	0.0118	-?
6_31322229_A_C			72.0	2.328	0.0199	+?
2_215901592_A_G			72.0	2.218	0.02654	+?
16_18549742_C_T			72.0	2.728	0.006367	+?
2_15613715_G_A			72.0	2.363	0.01811	+?
16_1910373_C_G			198.0	-2.723	0.006464	--
4_466346_C_CAT			198.0	2.557	0.01056	++
18_61575188_C_T			72.0	-2.267	0.02342	-?
12_104138918_C_T			198.0	2.362	0.01818	++
1_107600869_G_A			126.0	2.445	0.01447	?+
6_32552129_C_CATGTTTAA			72.0	2.408	0.01605	+?
2_32390834_A_C			72.0	2.214	0.02686	+?
9_131831440_G_A			198.0	2.226	0.02598	++
9_317195_G_A			198.0	-2.417	0.01565	+-
17_76521121_T_C			198.0	-2.415	0.01575	--
2_220285182_C_A			198.0	2.936	0.003321	++
16_57060967_G_A			198.0	-2.452	0.01421	--
13_20012206_G_C			198.0	2.202	0.02765	++
9_127228824_T_C			72.0	-2.954	0.003133	-?
18_14797914_A_G			198.0	3.624	0.0002904	++
22_42908095_T_C			72.0	-2.347	0.01894	-?
10_135113249_G_A			72.0	-2.348	0.01887	-?
2_132274370_C_T			72.0	-2.537	0.0112	-?
2_176805795_A_C			72.0	-2.607	0.009146	-?
11_85979678_C_T			72.0	2.843	0.004465	+?
15_74219582_G_A			198.0	2.598	0.009389	++
1_242042690_A_G			198.0	3.021	0.002517	++
17_73585273_TGGCTGCGGCGGCGGCTGC_T			126.0	2.741	0.006122	?+
17_66038979_CAA_C			198.0	-2.585	0.009737	--
3_44283525_A_G			198.0	-2.232	0.02565	--
17_28889884_C_G			72.0	2.498	0.01248	+?
21_19506694_T_G			72.0	3.559	0.0003723	+?
2_131414404_C_T			126.0	2.325	0.02006	?+
17_66526316_A_T			72.0	-2.596	0.009419	-?
13_114498034_G_A			72.0	2.275	0.02293	+?
6_109669587_G_T			198.0	2.298	0.02156	++
X_3190067_G_A			72.0	2.236	0.02532	+?
15_30900873_T_C			198.0	-2.307	0.02106	--
1_206317394_C_G			72.0	-2.439	0.01471	-?
9_134585181_C_T			72.0	2.683	0.00729	+?
11_60105366_T_C			198.0	-2.734	0.006253	--
19_17322746_CGAG_C			126.0	-2.471	0.01348	?-
14_99864970_C_T			72.0	2.235	0.02543	+?
6_29069016_G_A			198.0	2.324	0.02015	++
2_68389260_G_T			72.0	-2.507	0.01218	-?
2_44101649_G_GCC			72.0	-2.612	0.008994	-?
1_33476353_C_T			72.0	2.288	0.02214	+?
13_20000007_G_A			72.0	2.194	0.02822	+?
17_72839130_A_AGCTCCGGGG			198.0	2.169	0.03007	++
20_62322288_T_C			198.0	2.455	0.01407	++
9_101052858_T_C			198.0	2.251	0.02437	++
11_6417627_G_C			72.0	-2.274	0.02297	-?
3_112063850_C_A			198.0	2.172	0.02985	++
X_117733259_GA_GAA			126.0	-2.166	0.03032	?-
16_4722492_G_C			72.0	-2.17	0.03004	-?
10_97381077_CTTTT_C			126.0	2.171	0.02992	?+
3_37774360_G_A			72.0	-2.585	0.009743	-?
10_71870973_T_C			72.0	2.284	0.02238	+?
15_41803754_G_A			198.0	2.371	0.01773	++
4_76474866_T_C			72.0	2.315	0.02062	+?
5_180424089_TGA_T			72.0	2.62	0.008796	+?
12_105527517_G_T			72.0	2.992	0.002775	+?
15_82555146_CCTCTG_C			198.0	-2.512	0.012	--
16_68718750_A_G			198.0	2.161	0.03072	++
19_1271529_C_T			198.0	3.49	0.0004832	++
3_167068256_T_A			198.0	2.758	0.005815	++
6_28336394_CTT_C			72.0	-2.717	0.006587	-?
X_65253769_T_C			72.0	2.553	0.01067	+?
17_62892031_C_T			198.0	2.362	0.01818	++
22_46794475_T_C			198.0	-2.238	0.02522	--
17_73585356_G_A			126.0	2.741	0.006122	?+
2_113955074_G_A			198.0	-2.739	0.006162	--
19_19030120_G_C			72.0	2.749	0.005979	+?
7_23000076_A_AAGATCAACAT			72.0	-2.329	0.01985	-?
13_78165725_T_G			72.0	2.334	0.01962	+?
7_70254674_G_T			198.0	2.547	0.01087	++
1_878314_G_C			198.0	2.197	0.02799	++
5_6607125_GAAC_G			72.0	2.638	0.008348	+?
5_137500665_G_A			198.0	-2.9	0.003731	--
17_60651627_A_G			72.0	-2.634	0.008426	-?
8_39133481_A_T			72.0	-2.518	0.01179	-?
1_166908811_G_A			198.0	2.624	0.008679	++
12_52631510_ATGTGTG_ATG			72.0	-2.371	0.01774	-?
X_70354102_C_A			72.0	-2.588	0.009652	-?
7_45854553_T_C			72.0	2.343	0.01912	+?
7_12417362_T_C			198.0	-2.362	0.01818	--
11_77734294_A_T			72.0	2.6	0.009321	+?
8_86575124_G_C			72.0	2.333	0.01965	+?
4_42414945_G_A			126.0	-2.225	0.02608	?-
7_44073698_C_G			72.0	2.325	0.02007	+?
9_133352352_T_C			72.0	2.186	0.02884	+?
4_119552971_C_G			72.0	2.667	0.007653	+?
7_20431017_T_G			72.0	-2.224	0.02615	-?
6_82898746_C_CA			72.0	2.227	0.02592	+?
19_47287939_T_C			72.0	2.551	0.01074	+?
5_150496853_C_T			72.0	-3.075	0.002107	-?
9_36197382_A_G			72.0	-2.41	0.01596	-?
12_48131728_G_A			72.0	-2.405	0.01619	-?
19_54485291_C_G			126.0	2.366	0.01799	?+
10_99179206_C_T			72.0	2.328	0.01991	+?
7_134930169_A_AGAG			72.0	2.669	0.007614	+?
2_128369896_A_G			72.0	2.286	0.02224	+?
19_56175147_C_A			198.0	2.339	0.01933	++
2_143676146_T_A			198.0	-2.429	0.01515	--
2_238503473_C_T			72.0	2.197	0.02799	+?
8_25317987_C_T			72.0	-2.475	0.01333	-?
12_103248924_C_T			198.0	-2.389	0.01689	--
19_41111069_G_A			198.0	-2.649	0.008062	--
17_56344656_A_G			198.0	2.708	0.006775	++
14_20014585_C_T			198.0	2.368	0.01787	++
6_32820043_A_G			198.0	2.716	0.006607	++
1_9794305_C_T			72.0	-2.343	0.01913	-?
1_1110987_T_TC			198.0	-2.228	0.02588	--
11_2426100_G_A			72.0	-2.225	0.02611	-?
13_113724509_C_T			198.0	2.95	0.003181	++
17_79426416_A_G			198.0	-2.497	0.01254	--
1_152279841_G_C			198.0	-2.298	0.02154	--
7_98555932_G_GT			72.0	2.236	0.02534	+?
20_45315904_A_AT			198.0	2.992	0.002767	++
3_71247304_A_G			198.0	2.287	0.0222	++
5_137733891_A_G			198.0	-2.581	0.009845	--
19_35449409_G_A			198.0	-3.507	0.0004533	--
3_64526943_G_A			198.0	-2.193	0.02833	--
2_153378459_T_C			198.0	-2.169	0.03006	--
19_1116060_G_A			72.0	2.2	0.0278	+?
12_94729373_G_A			198.0	2.177	0.0295	++
17_8166647_G_A			198.0	-2.3	0.02146	--
6_38810043_G_A			72.0	-2.188	0.02866	-?
2_105665808_C_T			198.0	-2.315	0.02059	--
1_41284366_G_C			198.0	2.212	0.02695	++
3_183480195_T_C			72.0	-2.199	0.02789	-?
16_57790920_T_C			198.0	3.016	0.002559	++
16_30718873_C_T			198.0	2.744	0.006073	++
14_104145625_GT_G			198.0	2.968	0.002996	++
3_3143267_G_C			72.0	-2.615	0.008918	-?
2_198404929_C_G			198.0	-2.997	0.002724	--
12_120954490_C_T			198.0	2.605	0.009187	++
19_1924077_C_T			198.0	-2.509	0.01211	--
9_4646363_C_T			72.0	-2.793	0.005228	-?
5_140237158_G_A			198.0	-2.265	0.02353	--
16_30080780_C_T			198.0	2.517	0.01185	++
11_125443575_C_CTTT			72.0	-2.27	0.0232	-?
1_53746473_T_C			72.0	3.324	0.0008877	+?
16_31770696_G_GA			198.0	2.253	0.02425	++
4_54374598_A_AT			72.0	2.575	0.01004	+?
4_40825819_TA_T			198.0	2.855	0.00431	++
2_86564490_C_A			72.0	-2.35	0.01876	-?
1_91844815_T_C			198.0	-3.14	0.001687	--
20_31886815_C_T			72.0	2.549	0.01081	+?
19_49208865_G_A			126.0	-2.496	0.01258	?-
12_56493822_A_C			198.0	2.181	0.02915	++
9_16870472_A_G			72.0	-2.258	0.02394	-?
14_23854324_A_G			198.0	-2.214	0.02681	--
17_60368373_TA_T			72.0	-2.182	0.02908	-?
5_138266546_G_A			198.0	2.419	0.01558	++
X_45606280_GTC_GTCTCTCTCTCTC			70.0	-2.861	0.004228	-?
11_58318619_C_G			198.0	-2.281	0.02252	--
12_97957764_T_C			126.0	2.182	0.02909	?+
9_390512_C_T			198.0	-3.673	0.0002395	--
17_3567461_G_A			198.0	-2.226	0.02602	--
1_8415235_C_T			198.0	-2.324	0.02014	--
8_114111197_T_A			198.0	2.542	0.01103	++
8_105393687_G_A			72.0	2.221	0.02633	+?
20_37278612_T_A			72.0	2.185	0.0289	+?
7_100459583_A_C			72.0	2.163	0.03056	+?
12_56755058_A_G			198.0	2.763	0.005731	++
1_21755055_C_A			72.0	-2.594	0.009477	-?
17_38634763_C_T			198.0	2.437	0.01481	++
9_125239501_G_T			126.0	-2.337	0.01942	?-
13_53277989_A_G			72.0	2.262	0.02367	+?
2_202342737_A_G			198.0	3.324	0.0008861	++
1_1159197_G_C			72.0	-2.261	0.02378	-?
17_10444088_G_A			198.0	2.395	0.01661	++
X_66789065_T_G			72.0	-2.591	0.009567	-?
7_12428608_C_A			198.0	2.592	0.00954	++
4_88537432_TAGCAGTGACAGCAGTGACAGCAGCGACAGCAGTGACAGCAGCGACAGCAGTGACAGCAGCGACAGCAGTGACAGCAATGAAAGCAGCGACAGCAGTGACAGCAGCGATAGCAGTGACAGCAGCAAC_T			198.0	2.384	0.01711	++
1_249208772_C_T			198.0	-2.815	0.004882	--
1_149764332_G_C			72.0	-2.316	0.02056	-?
6_43266765_G_C			198.0	2.242	0.02495	++
8_82370535_A_T			72.0	2.285	0.02228	+?
2_179395958_T_C			198.0	-2.817	0.004845	--
7_123672456_CGCTGCT_CGCT			72.0	-2.745	0.006059	-?
15_27726080_A_G			72.0	2.73	0.006339	+?
10_87966028_T_C			72.0	-2.977	0.002915	-?
6_29141772_A_G			198.0	2.317	0.02051	++
6_31239378_T_G			198.0	2.183	0.02903	++
9_91690082_C_T			198.0	2.256	0.02404	++
5_127419937_GGCGGCGGCGGCGGCGGCA_G			198.0	2.206	0.02739	++
17_74684124_T_G			198.0	2.236	0.02538	++
13_42142260_C_CT			72.0	-2.45	0.01429	-?
12_110941725_A_T			198.0	-2.335	0.01954	--
2_79349372_C_G			72.0	-2.32	0.02032	-?
1_57258111_G_C			72.0	2.252	0.02434	+?
12_9007492_AT_A			72.0	2.404	0.01624	+?
21_43277279_C_CT			198.0	2.407	0.01607	++
19_1116117_C_T			198.0	2.467	0.01362	++
1_201840210_T_C			72.0	-2.356	0.01849	-?
7_128413997_CTT_CTTT			72.0	-2.18	0.02929	-?
22_36897261_C_G			198.0	2.287	0.02222	++
16_2138269_T_C			198.0	-2.57	0.01018	--
1_32669277_C_A			72.0	-2.296	0.02166	-?
1_67000103_A_G			198.0	2.417	0.01566	++
8_141994240_T_C			72.0	-2.253	0.02424	-?
8_103311016_T_G			72.0	-2.199	0.0279	-?
3_195395334_A_T			72.0	-2.376	0.01749	-?
1_197147471_A_C			72.0	2.182	0.02914	+?
10_71851734_G_A			198.0	2.698	0.006982	++
22_42309993_TG_T			72.0	2.189	0.02857	+?
1_1479186_C_A			198.0	2.378	0.0174	++
10_97373754_G_A			198.0	2.239	0.02515	++
15_69689440_C_T			72.0	-2.357	0.01841	-?
11_5020799_C_T			198.0	2.714	0.006655	++
1_233489705_TTG_T			198.0	2.178	0.02943	++
19_57665750_T_C			198.0	-2.49	0.01278	--
19_17311226_G_A			198.0	2.178	0.02944	++
20_3212223_A_T			198.0	-3.015	0.002571	--
19_10970558_A_G			198.0	-2.42	0.01552	--
19_6415711_G_A			126.0	2.335	0.01953	?+
7_154659567_T_G			72.0	2.852	0.004344	+?
5_172774424_T_C			72.0	2.397	0.01654	+?
1_154245512_A_G			72.0	-2.47	0.01351	-?
2_202337730_A_G			198.0	3.039	0.002371	++
15_90347783_C_T			198.0	2.651	0.008037	++
3_100567811_A_T			72.0	-2.179	0.02932	-?
3_101231863_GCTGCCGC_G			198.0	-2.382	0.0172	--
2_182543455_T_C			198.0	2.283	0.02243	++
5_137354851_CA_C			72.0	-2.438	0.01475	-?
12_6839453_G_A			72.0	2.179	0.02936	+?
X_100668296_C_T			198.0	-2.561	0.01045	--
10_13214160_T_C			72.0	2.448	0.01436	+?
4_74736034_C_G			72.0	-2.353	0.01861	-?
7_120605030_A_G			72.0	2.776	0.005497	+?
10_38536882_G_A			72.0	2.532	0.01135	+?
12_111947546_A_G			72.0	2.279	0.02266	+?
9_36085307_C_T			198.0	2.592	0.009531	++
4_86844948_A_G			198.0	-3.424	0.0006181	--
6_52962715_C_T			72.0	-2.294	0.02179	-?
17_62855003_TA_T			72.0	2.252	0.0243	+?
7_197267_G_A			126.0	2.524	0.01161	?+
15_30898836_A_T			72.0	-2.84	0.004509	-?
9_123210125_C_A			198.0	-2.564	0.01035	--
16_21732553_TACACACAC_TACAC			72.0	-2.413	0.01584	-?
18_50936780_G_A			198.0	-2.545	0.01094	--
8_141521765_G_A			126.0	2.224	0.02613	?+
9_130259618_A_C			198.0	-2.416	0.01571	--
6_56471995_C_T			198.0	-2.58	0.009886	--
1_6505848_G_C			72.0	-2.356	0.01846	-?
7_81591409_G_A			198.0	2.256	0.02407	++
19_2878180_C_T			198.0	2.335	0.01954	++
4_57891239_G_A			198.0	2.48	0.01312	++
X_106313508_G_A			72.0	2.226	0.02601	+?
14_105716574_C_T			198.0	-2.459	0.01392	--
9_123205981_C_T			198.0	-2.389	0.01689	--
1_152282917_G_T			198.0	-2.176	0.02954	--
X_2827794_TA_T			126.0	-2.538	0.01115	?-
7_140175007_A_ATGGCACGTGCCTGTAATCCCAGCTTC			72.0	-2.277	0.02281	-?
16_50759267_AC_A			72.0	2.674	0.007494	+?
1_21755756_G_C			72.0	-2.594	0.009477	-?
9_137642478_A_G			198.0	2.669	0.007602	++
5_167302880_CTT_CT			72.0	2.464	0.01374	+?
16_47732512_CTTTTTTT_CTTTTTTTT			72.0	-3.164	0.001559	-?
4_186324637_T_C			198.0	-2.168	0.03015	--
1_13183492_T_C			198.0	2.416	0.01571	++
15_65108652_T_C			72.0	2.297	0.0216	+?
19_49797887_TA_T			72.0	-2.597	0.009394	-?
22_22724394_T_C			72.0	2.878	0.003999	+?
17_43591984_C_CG			72.0	2.432	0.015	+?
3_172224726_G_C			72.0	2.843	0.004465	+?
14_81329347_C_T			72.0	-2.239	0.02518	-?
11_67413486_A_C			72.0	2.186	0.0288	+?
Y_13489384_G_A			72.0	2.447	0.0144	+?
5_150518359_G_A			198.0	-2.409	0.01598	--
16_68713823_C_A			198.0	2.161	0.03072	++
9_137271408_G_C			72.0	2.31	0.02089	+?
11_130715919_C_CAAGATCAAGATCAAG			72.0	2.509	0.0121	+?
9_15466905_A_G			72.0	2.381	0.01725	+?
2_234130_T_G			198.0	-2.224	0.02616	--
16_57116458_T_C			198.0	-2.823	0.004758	--
16_1843557_T_C			72.0	-2.866	0.004151	-?
3_142522753_A_T			198.0	2.373	0.01766	++
10_129224344_A_G			198.0	2.794	0.005201	++
17_45360680_C_T			198.0	2.219	0.02646	++
6_56482801_C_G			198.0	-3.566	0.000363	--
5_38823109_C_T			72.0	-2.281	0.02253	-?
12_1005162_T_C			198.0	2.503	0.01233	++
11_66055685_G_A			198.0	2.347	0.01894	++
9_79323348_G_A			198.0	2.558	0.01051	++
16_14649626_C_T			126.0	-2.161	0.03066	?-
2_27435374_G_A			198.0	2.72	0.006527	++
7_86781423_G_A			72.0	-2.642	0.008248	-?
4_16198378_A_G			72.0	-2.334	0.0196	-?
11_34673051_AG_A			198.0	2.523	0.01163	++
11_76922186_G_C			72.0	2.525	0.01156	+?
6_39159213_C_A			72.0	-2.443	0.01458	-?
2_27440013_CT_C			72.0	2.288	0.02216	+?
2_89161322_C_G			72.0	2.19	0.0285	+?
14_75558163_G_A			126.0	-2.734	0.006256	?-
21_43321946_G_A			72.0	-2.185	0.0289	-?
9_74360209_G_C			198.0	-2.876	0.004024	--
17_48069163_C_T			198.0	-2.304	0.0212	--
14_102466430_G_A			126.0	2.341	0.01923	?+
3_15132746_T_A			72.0	-2.409	0.01598	-?
8_143867841_C_G			198.0	2.573	0.01009	++
1_225580093_G_C			198.0	2.372	0.01771	++
12_121431225_G_A			72.0	2.832	0.004629	+?
6_56417545_T_C			198.0	2.701	0.006907	++
5_176686830_T_G			72.0	-2.173	0.0298	-?
2_20866888_CG_C			72.0	2.284	0.02234	+?
21_37833931_C_T			198.0	-2.926	0.003439	--
8_3807486_C_A			72.0	-2.358	0.01837	-?
15_22969232_G_A			198.0	2.563	0.01037	++
1_900505_G_C			198.0	-2.375	0.01757	--
19_48254707_T_C			198.0	-2.508	0.01215	--
15_40565055_G_A			198.0	2.186	0.02879	++
21_33765320_AGGAAGAGGCGGGGCTGGC_A			72.0	2.714	0.006653	+?
3_15807725_T_A			198.0	-2.38	0.0173	--
12_3951309_A_G			72.0	-2.174	0.0297	-?
1_87599697_G_A			72.0	2.75	0.005958	+?
5_179546529_C_A			72.0	2.279	0.02266	+?
2_171240249_C_T			198.0	2.206	0.02739	++
7_134928033_G_T			198.0	2.214	0.02685	++
9_137742018_A_ATATCACACCTCCCAGGAAGCACGG			72.0	2.317	0.02053	+?
4_119465612_T_A			72.0	2.331	0.01976	+?
1_37967707_ATTGACAGAGAAGATACATG_A			72.0	2.294	0.02178	+?
11_62259397_G_C			72.0	2.168	0.03019	+?
1_16973114_AGCCATGGTT_A			72.0	2.357	0.01841	+?
4_53814492_C_T			72.0	-2.231	0.0257	-?
17_80153421_G_A			72.0	2.446	0.01443	+?
20_25297640_A_G			126.0	2.182	0.02913	?+
5_11564999_C_T			198.0	2.547	0.01086	++
15_91017274_T_TTTC			198.0	-2.573	0.01009	--
11_1029135_C_T			198.0	-2.345	0.01903	--
1_24706410_T_C			72.0	2.206	0.02736	+?
2_15644111_C_T			72.0	2.403	0.01624	+?
14_105612885_G_A			198.0	2.598	0.009387	++
2_242622192_A_AG			72.0	-3.208	0.001337	-?
12_95390810_G_T			72.0	-2.243	0.0249	-?
2_74159734_T_C			72.0	2.174	0.02971	+?
9_112153740_C_T			198.0	2.392	0.01676	++
16_69200931_A_T			198.0	-2.751	0.005933	--
16_1842209_A_G			198.0	-2.367	0.01792	--
12_21065365_C_A			72.0	2.426	0.01526	+?
19_9362297_C_T			198.0	2.373	0.01763	++
1_26899687_C_A			198.0	2.39	0.01684	++
1_100503875_G_A			126.0	2.421	0.0155	?+
2_3391826_C_T			198.0	2.236	0.02538	-+
18_61256112_A_T			198.0	2.511	0.01205	++
4_25790077_G_A			72.0	-2.266	0.02344	-?
17_37319065_C_T			198.0	2.645	0.008162	++
4_74447865_TATATA_T			198.0	-2.426	0.01525	--
1_228112121_A_G			198.0	2.358	0.01837	++
20_40713532_G_A			198.0	2.718	0.006571	++
20_44002665_C_G			198.0	-2.291	0.02195	--
X_100645475_G_A			198.0	2.34	0.01931	++
3_171442635_C_T			198.0	-2.473	0.0134	--
4_16172181_C_T			72.0	-2.334	0.0196	-?
12_21007868_G_A			72.0	2.488	0.01285	+?
11_67050123_T_G			72.0	2.201	0.02776	+?
20_3204231_G_A			126.0	-2.441	0.01465	?-
12_40924446_T_C			72.0	2.53	0.0114	+?
3_15718652_T_A			72.0	-2.852	0.004346	-?
19_6214106_A_C			72.0	-2.226	0.026	-?
18_56204489_C_G			198.0	-2.173	0.02978	--
1_38186294_C_T			198.0	2.192	0.02838	++
15_30382356_A_C			198.0	-2.435	0.01489	--
19_49894152_C_T			198.0	2.246	0.02473	++
16_2339714_T_C			72.0	-2.257	0.02402	-?
8_23167300_G_A			198.0	2.681	0.00735	++
22_24040194_A_AGT			198.0	2.578	0.009934	++
16_4837362_T_C			72.0	-2.36	0.01826	-?
7_64864894_C_T			72.0	2.171	0.02996	+?
10_127431865_C_T			126.0	2.179	0.02932	?+
12_53516993_C_T			198.0	2.547	0.01086	++
17_7417551_T_C			198.0	-2.663	0.007738	--
8_145058037_A_G			198.0	-2.228	0.02588	--
10_48901439_G_A			72.0	2.235	0.02543	+?
19_43570851_T_G			72.0	-2.669	0.007606	-?
16_27692835_G_A			198.0	-2.985	0.002839	--
4_77201487_C_T			198.0	2.29	0.02202	++
20_62297400_T_C			198.0	2.305	0.02115	++
17_48596499_A_AG			126.0	2.608	0.0091	?+
1_151732700_A_G			198.0	-2.321	0.02027	--
19_41119273_G_C			198.0	-4.19	2.79e-05	--
5_478755_G_C			198.0	-2.255	0.02412	--
1_906272_A_C			198.0	2.562	0.0104	++
14_99865532_C_T			72.0	2.235	0.02543	+?
3_3080527_C_T			72.0	-2.755	0.005875	-?
22_21044498_G_C			72.0	2.394	0.01667	+?
8_145163647_T_C			198.0	2.216	0.02667	++
11_1030367_C_G			126.0	2.707	0.006789	?+
19_15541091_A_C			72.0	-2.408	0.01602	-?
1_149939610_G_A			72.0	-2.766	0.00568	-?
1_12907449_C_G			198.0	2.706	0.0068	++
12_11546990_C_G			72.0	2.304	0.02121	+?
1_18810486_A_C			72.0	2.356	0.01845	+?
2_170425526_C_A			72.0	2.377	0.01745	+?
11_60235683_G_T			198.0	-2.865	0.004167	--
11_125851272_C_A			198.0	2.324	0.02015	++
3_195016626_C_T			198.0	2.178	0.02942	++
1_3677818_G_A			72.0	2.447	0.01442	+?
2_238499863_A_AAATTCTTCAGGAGACTCT			198.0	-2.575	0.01001	--
7_12428803_G_A			198.0	2.298	0.02159	++
7_14384913_A_AT			198.0	-2.164	0.03045	--
17_65722690_G_A			72.0	2.321	0.02031	+?
5_176963333_G_C			198.0	-2.538	0.01114	--
4_70807771_C_T			198.0	-2.556	0.01059	--
5_176471284_T_C			72.0	2.689	0.007176	+?
19_43882895_A_C			72.0	-2.4	0.0164	-?
7_138760983_CT_C			72.0	2.56	0.01045	+?
12_6643927_T_G			198.0	-2.247	0.02464	--
16_70010516_ATGT_A			72.0	-2.38	0.01733	-?
10_133748121_A_G			198.0	-3.561	0.0003688	--
X_153070390_C_A			72.0	-2.463	0.01379	-?
4_466343_ATG_A			198.0	2.557	0.01056	++
21_35757787_C_T			198.0	-2.249	0.02454	--
15_45398965_G_T			198.0	-2.348	0.01887	--
6_32818236_G_A			198.0	2.716	0.006607	++
11_7650564_C_T			72.0	-2.281	0.02254	-?
2_242617005_G_A			72.0	2.257	0.02403	+?
5_140907265_C_A			126.0	-2.338	0.01936	?-
17_46115079_C_T			198.0	-2.269	0.02324	--
5_907505_G_A			72.0	-2.755	0.005878	-?
19_45211407_C_T			198.0	2.315	0.02062	++
13_114144842_T_C			72.0	2.19	0.0285	+?
8_62580882_G_C			198.0	-2.494	0.01263	--
1_206856203_C_T			72.0	2.824	0.004749	+?
10_123997287_C_T			72.0	-2.198	0.02798	-?
17_76521308_C_T			198.0	-2.797	0.005153	--
1_67242225_CAT_C			72.0	-2.685	0.007259	-?
8_15978641_C_A			72.0	-2.536	0.01121	-?
12_121439433_G_A			72.0	2.607	0.009123	+?
15_69684471_G_A			72.0	-2.357	0.01841	-?
1_36282399_CAAAAAAAAAAAAA_CAAAAAAAAAAAA			72.0	2.187	0.02873	+?
20_61443547_A_G			198.0	-2.712	0.006692	--
7_102574715_A_G			198.0	2.302	0.02133	++
5_175514291_A_G			72.0	-2.279	0.02264	-?
16_31483444_G_C			72.0	-2.722	0.006481	-?
2_3815532_AT_ATT			198.0	2.592	0.009554	++
19_17305440_T_C			198.0	-2.224	0.02618	--
19_19378195_GAA_AAA			72.0	-2.526	0.01153	-?
1_15905501_G_A			198.0	-2.446	0.01445	--
17_45888251_C_G			198.0	2.497	0.01251	++
8_82715211_GC_G			72.0	-2.199	0.02786	-?
1_174926860_CTT_CTTT			72.0	2.204	0.02749	+?
19_50100106_G_C			126.0	3.028	0.002465	?+
9_103065722_C_A			72.0	-2.208	0.02727	-?
15_79067099_G_C			198.0	2.211	0.02703	++
20_2736259_G_C			198.0	2.195	0.02814	++
17_80899229_C_T			198.0	2.402	0.01631	++
5_33460935_G_A			72.0	2.294	0.02179	+?
22_36537725_G_A			198.0	2.403	0.01627	++
9_102780721_T_C			72.0	-2.297	0.02164	-?
20_62737131_T_TGGGCGTGAC			72.0	-2.305	0.02119	-?
17_62232276_G_A			126.0	2.182	0.02914	?+
14_33014327_C_T			72.0	-2.504	0.01226	-?
1_6313938_C_T			198.0	3.414	0.0006393	++
19_35424815_T_C			72.0	-2.196	0.02809	-?
13_109562298_G_T			72.0	-2.186	0.02881	-?
17_3577146_C_T			198.0	2.732	0.006292	++
12_75692755_A_T			198.0	-2.372	0.01767	--
6_32557586_C_CT			198.0	2.443	0.01455	++
7_64643549_G_A			72.0	-2.789	0.005283	-?
1_36785855_C_T			72.0	2.571	0.01013	+?
2_7170517_G_T			72.0	2.194	0.02826	+?
11_5364541_CCAGCCCCAGGTCTGTGG_C			198.0	2.596	0.009425	++
8_2088797_C_T			126.0	2.636	0.008387	?+
11_67200819_C_T			198.0	-2.56	0.01046	--
2_233347919_C_G			198.0	2.586	0.009696	++
14_106209062_C_G			72.0	2.242	0.02498	+?
10_73121945_T_C			198.0	2.27	0.02321	++
6_66204504_A_G			198.0	-2.279	0.02269	--
X_23701662_G_A			72.0	3.099	0.001939	+?
12_53343069_G_T			198.0	2.324	0.02014	++
20_60485390_CGTT_C			72.0	-2.189	0.0286	-?
3_97868938_G_A			72.0	2.394	0.01664	+?
17_71238525_A_G			198.0	2.495	0.0126	++
1_178063897_A_G			72.0	-2.492	0.01272	-?
8_12286307_T_C			198.0	2.309	0.02095	++
10_27538735_G_A			72.0	-2.261	0.02376	-?
1_156875935_T_C			72.0	-2.579	0.009912	-?
3_48515079_C_T			72.0	2.186	0.02884	+?
4_7940857_A_G			198.0	-2.691	0.007118	--
16_5078220_C_T			198.0	-2.663	0.007744	--
7_91706406_C_T			72.0	-2.359	0.01835	-?
8_21984765_C_T			198.0	-2.51	0.01209	--
3_52512318_A_G			198.0	2.218	0.02657	++
6_34210470_A_AC			198.0	-2.975	0.002934	--
12_8666296_G_C			72.0	2.227	0.02592	+?
X_152610051_A_T			72.0	-3.007	0.002635	-?
1_153907306_T_TGC			72.0	2.658	0.007868	+?
4_55143577_G_A			198.0	2.532	0.01135	++
20_26094490_A_T			72.0	2.257	0.02402	+?
4_119552436_A_C			72.0	2.545	0.01093	+?
22_46403039_G_A			198.0	-2.793	0.005219	--
7_21658964_C_T			72.0	2.282	0.02247	+?
5_457176_T_A			198.0	-2.231	0.02569	--
X_27999101_A_T			126.0	2.288	0.02216	?+
16_2144299_T_G			72.0	-2.399	0.01644	-?
19_17014505_C_T			126.0	-2.223	0.02622	?-
14_55647575_CA_C			72.0	2.217	0.02665	+?
4_108603314_G_A			198.0	2.161	0.03071	++
1_151811226_G_A			72.0	2.601	0.009285	+?
13_33052294_C_T			72.0	2.388	0.01695	+?
14_101447517_A_G			72.0	-2.279	0.02269	-?
5_14751399_C_T			198.0	-2.565	0.0103	--
11_85431954_G_T			198.0	-2.18	0.02926	--
2_130951967_C_T			72.0	2.294	0.02179	+?
9_1055870_A_G			72.0	-2.485	0.01295	-?
2_179444137_A_G			198.0	-2.821	0.004783	--
13_37679729_C_T			126.0	2.182	0.0291	?+
8_77765398_A_G			198.0	2.236	0.02534	++
7_44178626_A_G			198.0	2.353	0.01862	++
20_34430474_AT_A			126.0	2.639	0.008326	?+
12_56398454_G_C			198.0	-3.28	0.001038	--
11_128333593_G_A			72.0	2.473	0.01342	+?
22_35679951_T_C			198.0	3.652	0.0002602	++
4_10099542_CA_C			126.0	3.063	0.00219	?+
10_18430160_C_G			72.0	2.486	0.01291	+?
19_54403925_T_C			198.0	-2.37	0.01778	--
19_14826849_T_C			198.0	-2.619	0.008818	--
9_35562348_C_T			198.0	2.16	0.03077	++
7_140110781_G_C			198.0	-2.718	0.006571	--
15_36946153_G_A			72.0	-2.306	0.02109	-?
11_64992930_C_T			198.0	-2.955	0.003126	--
20_25470460_T_A			126.0	-2.466	0.01365	?-
4_48147309_T_C			198.0	-3.063	0.002191	--
10_98901438_T_C			72.0	-2.779	0.005449	-?
11_76870450_C_G			72.0	-2.269	0.02327	-?
19_51208018_A_G			72.0	-2.702	0.006884	-?
2_39084292_A_G			72.0	2.32	0.02034	+?
4_152487669_T_C			72.0	2.509	0.0121	+?
17_15928584_T_G			72.0	2.383	0.01717	+?
2_230223477_CA_C			72.0	-2.676	0.007451	-?
11_85981314_C_CTTAT			72.0	2.464	0.01372	+?
9_113490776_C_T			72.0	2.212	0.02697	+?
7_100639456_C_T			198.0	2.234	0.02549	++
3_7620382_C_T			198.0	2.473	0.01339	-+
9_34727001_C_T			72.0	-2.574	0.01005	-?
16_21161572_T_A			72.0	2.358	0.01839	+?
12_351743_C_T			72.0	-2.191	0.02849	-?
3_42735274_A_G			198.0	-2.224	0.02618	--
2_132021475_G_A			198.0	-2.994	0.002753	--
19_5174030_A_G			72.0	2.422	0.01545	+?
11_499066_C_T			198.0	-2.877	0.004014	--
17_58156301_T_G			72.0	-2.365	0.01804	-?
11_111933088_A_G			198.0	-2.692	0.0071	--
3_9739693_C_T			72.0	2.225	0.0261	+?
2_240055873_A_G			72.0	2.198	0.02792	+?
2_160708923_GT_G			198.0	2.497	0.01253	++
19_49878115_G_A			198.0	2.303	0.02126	++
7_44839429_C_T			198.0	2.866	0.004151	++
15_90347920_G_A			198.0	2.651	0.008037	++
8_10388615_CTGTTT_C			72.0	2.18	0.02924	+?
X_152915235_T_C			72.0	-2.665	0.007706	-?
1_87530308_C_A			72.0	2.245	0.02478	+?
2_242648545_C_T			72.0	-3.192	0.001415	-?
1_21755906_G_A			72.0	-2.594	0.009477	-?
19_45754812_A_C			198.0	2.369	0.01784	++
9_20620596_C_T			198.0	2.214	0.02682	++
9_134953099_T_C			72.0	2.445	0.01447	+?
1_162773984_T_C			198.0	-2.254	0.02418	--
3_108156633_A_AAAAG			72.0	2.577	0.00996	+?
7_30085766_T_G			198.0	3.065	0.002176	++
8_95778045_ACT_A			72.0	2.191	0.02847	+?
12_110927882_A_G			198.0	-2.335	0.01954	--
1_152192555_T_C			198.0	-2.36	0.01826	--
22_22891081_G_T			198.0	2.4	0.01638	++
18_6870524_T_C			198.0	2.756	0.005846	++
3_52558133_T_C			198.0	2.176	0.02958	++
1_207679480_C_A			126.0	2.272	0.02307	?+
1_59004617_G_A			198.0	-2.405	0.01618	--
11_118068949_C_T			72.0	2.264	0.02359	+?
9_130216951_G_T			198.0	-2.333	0.01966	--
16_20361087_T_TTCTGCCAGA			198.0	-2.202	0.02765	--
11_32417669_A_T			72.0	2.257	0.02401	+?
4_15709093_A_T			126.0	2.982	0.002862	?+
7_42212210_C_T			72.0	-2.401	0.01635	-?
6_65300290_T_G			72.0	-2.517	0.01183	-?
12_45833451_G_T			126.0	2.446	0.01444	?+
4_186294284_T_C			198.0	-2.346	0.01895	--
7_27222409_G_A			198.0	-2.354	0.01856	--
15_56207983_C_T			198.0	2.195	0.02814	++
3_42229296_G_A			72.0	2.715	0.006637	+?
22_40271614_C_G			72.0	-2.566	0.0103	-?
2_97915835_C_T			198.0	2.315	0.02062	++
19_17641667_G_A			198.0	-3.123	0.00179	--
11_35492351_G_A			198.0	2.989	0.002795	++
7_38543371_C_T			198.0	3.123	0.001788	++
15_20462613_G_C			72.0	-2.42	0.0155	-?
19_11436339_C_A			72.0	3.014	0.002579	+?
X_53264307_C_G			72.0	2.357	0.01841	+?
14_35557331_C_T			72.0	2.357	0.01841	+?
19_54781364_C_T			72.0	-2.257	0.02403	-?
10_32742257_A_AT			126.0	-2.164	0.03047	?-
16_71008389_A_C			198.0	2.343	0.01912	++
16_89653534_GCCGCCCCCTCAGTCCGTGGCCCCGCCCCGCC_G			198.0	-2.319	0.02041	--
8_118185063_C_G			72.0	-2.184	0.02895	-?
10_46195776_A_G			72.0	-2.219	0.0265	-?
1_173839240_C_T			72.0	-2.398	0.0165	-?
7_150035391_G_A			72.0	2.677	0.007422	+?
6_36715921_C_T			72.0	-2.54	0.01107	-?
17_70643873_C_G			72.0	2.285	0.02228	+?
9_136319600_G_A			198.0	-2.605	0.009186	--
4_169279364_C_T			198.0	-3.764	0.0001674	--
17_10360854_C_T			198.0	2.256	0.02404	++
17_79426021_GC_G			198.0	-2.184	0.02896	--
22_20715828_C_G			72.0	-2.386	0.01702	-?
4_109735146_T_G			198.0	2.593	0.009526	++
10_73490310_G_A			198.0	2.209	0.02716	++
2_101889306_A_G			72.0	2.333	0.01964	+?
17_71241279_C_T			198.0	-2.648	0.008095	--
11_7687913_C_T			72.0	-2.251	0.0244	-?
18_34182800_A_G			198.0	-2.581	0.009843	--
12_71314102_C_T			198.0	-2.213	0.02689	--
7_75048750_G_A			198.0	2.849	0.004392	++
19_54742999_C_A			198.0	2.619	0.008824	++
11_8778352_A_G			72.0	-2.38	0.01731	-?
15_40510662_C_T			198.0	2.69	0.007146	++
10_15702969_AAC_A			72.0	2.551	0.01074	+?
22_40719314_G_GT			198.0	-2.624	0.008682	--
2_234708570_G_A			198.0	-2.163	0.03055	--
1_165721489_ATTTT_TTTTT			72.0	2.75	0.005955	+?
17_7576501_G_A			198.0	2.399	0.01642	++
1_12907848_G_C			198.0	2.69	0.00715	++
16_84351853_C_T			198.0	2.25	0.02447	++
10_75009107_T_A			72.0	-2.553	0.01067	-?
1_16916603_C_A			72.0	-2.515	0.01191	-?
17_74289519_C_T			198.0	-2.406	0.01611	--
1_39457016_C_T			198.0	2.177	0.02949	++
5_2747433_ATTT_ATT			72.0	-2.521	0.01169	-?
7_99811204_G_C			72.0	2.168	0.03016	+?
21_22757976_G_A			198.0	3.014	0.002579	++
1_236958478_T_A			72.0	2.429	0.01516	+?
8_130496232_C_T			72.0	-2.436	0.01486	-?
2_219694794_G_A			198.0	-2.901	0.00372	--
16_28550269_C_T			198.0	-2.361	0.01825	--
5_1232240_C_T			72.0	-2.387	0.01698	-?
22_22989281_T_C			198.0	-2.295	0.02171	--
9_4629041_GAA_G			126.0	-2.337	0.01946	?-
12_11420778_C_T			72.0	2.292	0.0219	+?
20_18131723_C_T			72.0	2.389	0.0169	+?
6_29408894_G_C			72.0	-2.403	0.01625	-?
1_155884143_T_C			72.0	-2.364	0.01807	-?
7_73122977_G_A			198.0	2.172	0.02983	++
4_87556253_G_A			72.0	2.183	0.02904	+?
10_99258025_C_A			126.0	-2.398	0.0165	?-
1_247582463_TATA_T			72.0	-2.187	0.02874	-?
14_38256769_A_G			198.0	2.785	0.005358	++
8_103311153_C_T			198.0	2.283	0.02246	++
19_35757427_G_A			198.0	-2.769	0.005618	--
3_142467310_C_T			198.0	2.373	0.01766	++
4_25379226_G_T			198.0	-2.43	0.01508	--
7_75128597_T_C			198.0	2.236	0.02533	++
9_94874666_A_T			126.0	2.171	0.02991	?+
18_21479181_CTT_CT			72.0	-3.798	0.0001458	-?
5_131796609_C_T			198.0	-2.426	0.01529	--
9_135546021_G_A			126.0	2.174	0.02972	?+
11_57479730_CCG_C			126.0	2.668	0.007639	?+
7_98504019_TTTTTGTTTTA_T			72.0	-2.282	0.02249	-?
18_53131179_C_CTG			71.0	-2.21	0.02713	-?
12_117187907_T_C			198.0	-2.412	0.01589	--
6_32819854_A_G			198.0	2.716	0.006607	++
17_71239214_GAA_G			198.0	2.939	0.003291	++
6_8027557_T_C			72.0	2.572	0.01011	+?
15_31334362_C_T			198.0	-2.489	0.0128	--
1_226053805_G_A			72.0	2.727	0.006389	+?
6_160241351_T_C			72.0	2.606	0.009153	+?
11_94279080_T_G			126.0	2.179	0.02934	?+
11_123777736_T_C			198.0	-2.229	0.0258	--
12_48512331_C_T			72.0	2.549	0.01081	+?
5_129244122_C_T			198.0	2.269	0.02328	++
11_72408840_AGGATGGCGG_A			72.0	2.356	0.0185	+?
16_74419227_T_C			126.0	2.181	0.0292	?+
5_67535789_C_T			72.0	-3.234	0.001222	-?
10_43976983_T_C			198.0	-2.949	0.003193	--
2_201736166_A_C			198.0	3.114	0.001845	++
6_32557605_AGTT_AT			72.0	3.004	0.002664	+?
1_17666139_G_A			198.0	3.298	0.0009753	++
17_60374173_CTT_CT			72.0	2.622	0.00874	+?
2_217363597_C_T			198.0	-2.501	0.01239	--
1_3698017_G_A			198.0	-2.577	0.009975	--
17_45892424_T_C			72.0	-2.278	0.02271	-?
19_17986763_C_T			72.0	-2.249	0.0245	-?
9_130221388_T_C			198.0	-2.379	0.01737	--
6_3076930_A_AT			72.0	-2.439	0.01474	-?
21_45064164_T_C			198.0	-2.629	0.008569	--
1_161293491_TA_T			72.0	2.285	0.02228	+?
1_71437471_T_TA			198.0	-2.196	0.0281	--
7_6080853_GAA_G			198.0	2.174	0.0297	++
2_219674163_C_T			72.0	2.269	0.02325	+?
1_91850826_C_CA			198.0	-2.407	0.01608	--
5_52781376_GTTT_GT			72.0	-2.307	0.02107	-?
9_74863449_AG_A			72.0	-2.605	0.009184	-?
4_57357739_T_TA			126.0	2.269	0.02329	?+
2_128401091_A_G			72.0	2.579	0.009901	+?
20_19261922_G_A			72.0	-2.264	0.0236	-?
17_79871024_TA_T			72.0	-2.45	0.01429	-?
9_130635526_A_G			72.0	2.294	0.02179	+?
19_45488434_A_G			198.0	2.445	0.0145	++
18_3452262_C_T			72.0	2.559	0.01051	+?
6_90583601_T_A			198.0	-2.354	0.01856	--
1_152281523_A_C			198.0	-2.348	0.01887	--
16_31405736_C_G			198.0	2.197	0.02801	++
1_26514111_CTT_CT			72.0	-2.606	0.009157	-?
9_67968855_A_G			198.0	-2.163	0.03051	--
4_186392301_C_A			71.0	-2.692	0.007102	-?
19_40096089_T_C			198.0	-2.169	0.03011	--
11_57995777_G_A			198.0	2.623	0.00872	++
5_156482101_A_T			72.0	2.609	0.009075	+?
20_61443660_G_A			198.0	-2.44	0.01467	--
2_153435288_G_A			72.0	-2.625	0.008675	-?
12_10279527_G_A			72.0	2.535	0.01123	+?
6_88366602_A_G			198.0	-2.439	0.01471	--
2_179455207_T_C			198.0	-2.7	0.00694	--
8_145170959_G_C			198.0	2.549	0.01081	++
22_50685051_C_T			126.0	2.415	0.01572	?+
6_160523709_C_T			198.0	-2.265	0.02352	--
20_44638750_C_G			126.0	-2.186	0.02882	?-
10_118969346_T_C			198.0	2.595	0.009452	++
15_94410296_A_G			198.0	2.309	0.02096	++
22_45205158_G_GT			126.0	4.186	2.837e-05	?+
7_45860535_C_T			72.0	2.39	0.01683	+?
13_95273447_G_A			198.0	-2.32	0.02032	--
7_129853461_G_C			72.0	-2.28	0.0226	-?
2_120125973_G_C			72.0	-2.295	0.02175	-?
17_80085916_C_T			72.0	2.556	0.01059	+?
15_74749154_CT_C			72.0	-3.068	0.002154	-?
6_52659097_C_T			198.0	-2.508	0.01216	--
1_11105542_C_T			198.0	2.891	0.003842	++
17_73568984_G_A			72.0	-3.365	0.0007642	-?
11_1651229_G_A			126.0	-2.225	0.02606	?-
16_4254523_C_T			198.0	-2.277	0.02281	+-
4_40438931_T_C			72.0	2.295	0.02171	+?
6_38520530_GA_G			72.0	-2.772	0.005565	-?
8_24250832_C_G			126.0	2.361	0.01821	?+
3_66419760_A_T			72.0	-2.188	0.02865	-?
19_19137051_CA_C			198.0	-2.567	0.01026	--
6_53379405_A_C			72.0	2.281	0.02256	+?
17_71239016_C_T			198.0	2.495	0.0126	++
6_44148153_T_A			126.0	2.364	0.01807	?+
7_104758250_T_C			198.0	-2.217	0.02666	--
10_14013769_G_T			126.0	2.273	0.023	?+
16_1733351_G_A			72.0	-2.252	0.02435	-?
1_40960619_G_A			198.0	2.408	0.01604	++
6_154489255_GA_G			198.0	2.321	0.02028	++
7_30113617_A_AG			126.0	2.399	0.01645	?+
15_100269635_G_C			198.0	2.436	0.01487	++
12_132402044_C_A			198.0	-2.177	0.02948	--
18_61078888_GT_GTT			72.0	-2.849	0.00439	-?
19_872089_A_G			198.0	2.331	0.01976	++
12_43964280_G_T			72.0	-2.587	0.009674	-?
22_46402715_G_T			198.0	-2.793	0.005219	--
1_169138307_C_A			72.0	-2.304	0.02124	-?
1_192548543_T_G			72.0	2.181	0.0292	+?
2_47238383_C_A			72.0	-2.219	0.02646	-?
19_1271274_C_T			198.0	3.095	0.001966	++
5_132149684_G_C			198.0	2.815	0.004882	++
1_152185882_G_A			196.0	2.515	0.01189	++
2_190640475_A_G			198.0	2.256	0.02408	++
9_139142710_G_A			72.0	-2.232	0.02562	-?
11_85374467_GA_G			72.0	2.329	0.01985	+?
7_8196567_AAAAAAAAAAAAAAAAAAGAAAG_AAAAG			198.0	2.42	0.01554	++
9_34728065_G_A			72.0	-2.83	0.004661	-?
1_2535561_T_C			126.0	-2.223	0.02623	?-
7_132938039_C_CCCTT			72.0	2.192	0.02839	+?
8_98817552_C_CTT			126.0	3.417	0.0006339	?+
2_202342402_G_T			198.0	2.56	0.01048	++
5_178416234_T_C			72.0	2.342	0.0192	+?
22_41565285_A_G			72.0	2.349	0.01882	+?
19_48643470_G_T			126.0	2.636	0.008386	?+
2_183827018_G_A			198.0	2.766	0.005677	++
3_195346643_C_T			72.0	-2.375	0.01753	-?
10_17199778_C_A			198.0	-2.298	0.02156	--
15_102294941_G_A			72.0	-2.652	0.008	-?
10_133795202_T_TTGGCCTCCCTC			198.0	-2.917	0.003531	--
10_5200075_C_T			72.0	2.358	0.01839	+?
10_128794827_C_T			72.0	2.298	0.02155	+?
18_14797913_C_T			198.0	3.624	0.0002904	++
19_6713262_G_A			198.0	2.473	0.01341	++
3_52513940_T_C			198.0	2.218	0.02657	++
2_238503463_A_G			72.0	2.197	0.02799	+?
16_84774120_T_C			72.0	3.195	0.001397	+?
2_236716006_T_A			198.0	-2.309	0.02095	--
17_15142945_C_T			72.0	2.301	0.02139	+?
19_44585159_T_A			198.0	2.993	0.002762	++
15_42729473_T_G			72.0	-2.167	0.03027	-?
1_152281228_C_G			198.0	-2.348	0.01887	--
17_78263404_A_G			126.0	-2.338	0.01938	?-
4_87808810_G_GCA			72.0	2.198	0.02798	+?
1_148014331_A_G			72.0	-2.346	0.01895	-?
2_178417142_C_T			198.0	2.831	0.004641	++
22_20640635_C_T			72.0	-2.379	0.01737	-?
9_139890129_A_G			72.0	2.515	0.01192	+?
19_39037276_G_A			72.0	2.357	0.0184	+?
9_74314368_TA_TAA			72.0	2.188	0.02869	+?
5_78181423_C_T			198.0	-2.286	0.02227	+-
12_95434452_C_T			72.0	-2.468	0.01359	-?
11_7713009_C_A			72.0	2.503	0.01232	+?
17_73586233_C_G			126.0	2.536	0.01122	?+
2_182350489_T_C			72.0	2.529	0.01143	+?
20_41306445_A_G			198.0	-2.724	0.006447	--
6_167752086_T_C			72.0	2.242	0.02498	+?
8_126085363_T_C			198.0	-2.789	0.005282	--
2_220309685_G_A			198.0	2.563	0.01037	++
1_27686314_T_C			198.0	-2.845	0.004444	--
15_44778962_T_G			198.0	2.407	0.01608	++
15_33795971_T_C			72.0	2.227	0.02592	+?
14_105858022_C_T			198.0	2.59	0.009598	++
2_234967569_C_T			198.0	2.207	0.02728	++
20_31608300_G_A			198.0	2.765	0.00569	++
4_190861938_C_CT			72.0	2.329	0.01987	+?
X_114424505_G_A			198.0	-2.212	0.02698	--
1_158969797_A_G			126.0	2.362	0.01818	?+
2_136527443_G_GTGAT			198.0	-3.259	0.001119	--
1_109173710_G_A			72.0	2.868	0.004134	+?
14_81574845_T_TTTTTTTCTTTTTAC			198.0	2.268	0.02334	++
16_12609706_C_G			72.0	-2.172	0.02982	-?
1_179319631_A_G			72.0	2.235	0.02543	+?
11_4791111_T_C			198.0	2.279	0.02265	++
6_31239430_C_T			198.0	2.348	0.01885	++
12_51402905_T_G			198.0	-2.517	0.01183	--
9_125760152_A_G			72.0	2.204	0.0275	+?
2_136633771_T_C			198.0	3.476	0.0005087	++
22_41460489_C_T			72.0	-2.352	0.01869	-?
9_132382702_T_C			126.0	2.422	0.01543	?+
10_13900729_G_C			72.0	-2.424	0.01534	-?
19_15121210_C_T			72.0	2.51	0.01208	+?
5_131928560_C_G			72.0	2.531	0.01138	+?
22_38481886_C_T			72.0	2.204	0.0275	+?
9_86588146_C_CT			198.0	2.244	0.02486	++
15_40556713_T_C			72.0	3.654	0.0002586	+?
2_231775094_C_A			198.0	-2.716	0.006612	+-
8_133900840_ATGTG_ATGTGTG			72.0	-2.891	0.003836	-?
11_69972023_G_C			72.0	-2.22	0.02644	-?
17_7145492_C_CA			198.0	-2.277	0.02279	--
3_178935943_C_T			198.0	-2.293	0.02184	--
5_175516384_C_T			72.0	-2.223	0.02624	-?
X_70888572_G_A			126.0	2.193	0.02832	?+
19_40009683_C_T			198.0	2.238	0.02522	++
11_1905653_G_C			72.0	-2.415	0.01573	-?
9_140108969_C_T			198.0	2.41	0.01594	++
11_6585032_G_A			198.0	-2.514	0.01194	--
17_7412212_A_G			198.0	-2.357	0.0184	--
2_61187478_CAAA_CAA			72.0	-2.507	0.01218	-?
6_46657057_A_G			198.0	2.326	0.02001	++
19_54664809_G_A			198.0	2.225	0.02607	++
1_89408629_A_G			72.0	2.279	0.02266	+?
3_97365038_G_A			198.0	-2.288	0.02211	--
11_6281400_T_C			72.0	-3.037	0.002391	-?
22_26291452_A_C			72.0	-2.58	0.009891	-?
16_1877494_T_C			198.0	2.388	0.01694	++
1_181695070_T_C			72.0	2.316	0.02055	+?
2_113590390_G_A			198.0	-2.241	0.02503	--
11_130066261_C_A			198.0	2.546	0.01088	++
19_53784977_T_C			72.0	-2.302	0.02133	-?
3_185766711_G_A			198.0	-3.47	0.0005198	--
11_837662_TG_T			198.0	-2.898	0.003759	--
19_36233139_G_GGA			72.0	-2.48	0.01314	-?
11_128932128_A_AG			198.0	2.437	0.01481	++
9_7046901_C_G			198.0	-3.792	0.0001495	--
20_50734114_C_T			72.0	2.484	0.01299	+?
19_36322456_G_A			198.0	2.411	0.0159	++
6_79664748_T_C			198.0	-2.282	0.02249	--
17_79249997_C_T			198.0	2.361	0.01823	++
16_83065965_T_A			72.0	-2.349	0.01882	-?
8_15978186_C_T			198.0	-2.339	0.01934	--
1_166831404_A_C			198.0	-3.295	0.0009846	--
1_27661231_C_T			198.0	-2.482	0.01307	--
1_111441829_C_T			198.0	2.491	0.01273	++
17_79279019_G_GC			198.0	2.197	0.02801	++
13_110847591_T_C			72.0	2.294	0.02179	+?
3_7620828_G_A			198.0	2.473	0.01339	-+
2_11728854_G_A			198.0	2.784	0.00537	++
22_22723864_G_A			72.0	2.638	0.008339	+?
4_79455714_C_G			198.0	-2.232	0.02563	+-
16_57494402_GA_G			72.0	-2.397	0.01654	-?
7_100818101_A_G			198.0	2.468	0.0136	++
1_35654765_G_A			126.0	2.852	0.004349	?+
8_12423373_T_C			72.0	-2.427	0.01524	-?
19_47285598_CTCCA_CATCCA			126.0	-2.229	0.02579	?-
5_156734665_ATG_GTG			72.0	-2.959	0.003087	-?
5_14487530_C_A			72.0	-2.488	0.01285	-?
14_58604850_A_C			198.0	-2.541	0.01105	--
17_40179568_T_A			126.0	2.843	0.004462	?+
19_14817548_T_A			198.0	-2.617	0.008874	--
9_117062322_G_A			198.0	2.289	0.02207	++
8_21974032_A_C			72.0	-2.389	0.01691	-?
8_82391133_G_A			72.0	2.285	0.02228	+?
19_17641340_CAAAAAAAAAAAAAAA_C			72.0	-2.52	0.01173	-?
22_31011557_T_C			198.0	2.416	0.0157	++
19_50475259_G_C			72.0	-2.406	0.01612	-?
20_2539387_G_A			198.0	2.371	0.01772	++
3_42299865_TG_T			72.0	2.2	0.02779	+?
2_204594512_T_C			198.0	-2.406	0.01613	--
17_17122262_C_T			198.0	2.408	0.01606	++
13_76370755_AT_A			198.0	-2.817	0.004843	--
16_1656765_A_G			72.0	-3.118	0.001821	-?
1_152283283_C_T			198.0	-2.176	0.02954	--
10_79577001_A_C			72.0	-2.229	0.02582	-?
1_152189055_G_C			198.0	2.684	0.007275	++
19_50476426_C_T			72.0	-2.358	0.01836	-?
8_145059425_T_C			198.0	-2.228	0.02588	--
1_248167096_C_T			72.0	-2.781	0.005414	-?
6_32551836_T_A			125.0	-2.189	0.02863	?-
5_1225613_G_A			198.0	-2.272	0.02307	--
2_128608270_G_A			72.0	-2.48	0.01314	-?
1_100366141_A_G			126.0	2.498	0.01249	?+
2_170096018_G_A			198.0	-2.228	0.02591	--
14_81361138_G_T			72.0	-2.239	0.02518	-?
3_58625813_G_A			198.0	2.251	0.02435	++
4_38798869_A_G			72.0	-2.232	0.02563	-?
18_74694720_G_C			72.0	3.027	0.002466	+?
11_9004376_CTT_CT			72.0	2.677	0.007418	+?
1_153617749_C_T			198.0	2.95	0.003174	++
7_151802505_C_T			198.0	2.837	0.004555	++
16_58540531_A_G			198.0	-2.732	0.0063	--
8_103316437_G_A			198.0	-3.126	0.001775	--
5_145478009_C_T			72.0	2.694	0.007065	+?
X_9713864_A_G			72.0	-2.234	0.02552	-?
9_130630589_G_T			72.0	2.294	0.02179	+?
13_103473497_T_G			198.0	-2.25	0.02446	--
12_111779931_G_C			72.0	2.279	0.02266	+?
22_43634750_T_C			198.0	2.222	0.02626	++
9_34729253_A_G			198.0	2.734	0.006251	++
12_105371678_T_C			72.0	-2.213	0.02689	-?
8_39140955_ATG_A			72.0	-2.178	0.02938	-?
1_32118159_AC_A			72.0	-2.841	0.004493	-?
2_241621908_G_A			198.0	-2.333	0.01963	--
2_202215409_C_CAAAACAAAACAAAACAA			198.0	3.782	0.0001555	++
1_35442633_C_A			198.0	2.193	0.02827	++
17_71257804_A_C			198.0	-2.994	0.002751	--
8_104343686_G_A			198.0	-2.22	0.02641	--
4_967339_C_G			198.0	-2.218	0.02659	--
17_80137173_C_T			72.0	-2.361	0.01823	-?
5_68692363_T_A			72.0	-2.352	0.01867	-?
7_30101683_C_G			198.0	2.944	0.003244	-+
8_22138819_TA_TAA			126.0	-2.355	0.01854	?-
16_30770950_T_C			198.0	2.744	0.006073	++
5_16762252_A_AAAAT			126.0	-2.194	0.02825	?-
11_6647951_G_T			72.0	2.905	0.003678	+?
2_131266746_C_T			198.0	-2.597	0.009397	--
11_77815059_A_G			198.0	-2.613	0.008977	--
7_22896363_G_C			72.0	3.187	0.001436	+?
1_36282427_G_A			72.0	2.492	0.01272	+?
1_152190452_T_C			198.0	2.936	0.003329	++
17_6337173_C_G			198.0	2.805	0.005028	++
5_169469088_G_C			198.0	2.706	0.00681	++
11_47736314_C_G			72.0	-2.303	0.02126	-?
11_94782539_G_A			72.0	-2.304	0.02121	-?
12_78542699_T_C			198.0	2.604	0.009206	++
10_129705623_A_G			126.0	2.878	0.003999	?+
7_1477154_G_GCGCGCGGGGGA			72.0	-2.231	0.02566	-?
4_100266583_A_C			72.0	2.82	0.004803	+?
9_79997124_T_C			198.0	2.505	0.01224	++
11_63058088_A_T			198.0	2.682	0.007313	++
11_32676638_T_TAC			72.0	-2.372	0.01769	-?
1_153631884_A_G			72.0	2.257	0.02402	+?
1_237817784_A_G			198.0	2.562	0.0104	++
9_127231763_G_A			72.0	2.357	0.0184	+?
4_962053_G_C			126.0	-2.365	0.01803	?-
X_152610294_A_G			72.0	-3.007	0.002635	-?
1_208219545_T_C			72.0	-2.348	0.0189	-?
22_19882510_G_A			72.0	-2.579	0.009909	-?
9_77286876_A_C			198.0	2.578	0.009945	++
11_870467_C_T			198.0	2.402	0.01632	++
11_18330385_G_GA			72.0	2.228	0.0259	+?
5_148562890_G_A			72.0	2.355	0.01852	+?
3_113594377_A_G			198.0	-3.113	0.001852	--
4_2341194_T_C			198.0	2.245	0.02478	++
8_24196898_C_T			72.0	2.248	0.02455	+?
17_20945830_G_A			72.0	-2.213	0.02689	-?
5_21585420_A_G			72.0	2.871	0.004094	+?
1_93646418_C_T			198.0	2.193	0.0283	++
1_20009471_G_A			72.0	-2.498	0.01248	-?
11_884193_C_T			198.0	2.358	0.01836	++
2_170030821_T_C			72.0	3.276	0.001053	+?
19_57666840_G_A			72.0	-2.94	0.003277	-?
1_22158743_C_CATGA			72.0	2.404	0.01622	+?
5_160049355_C_T			198.0	2.261	0.02377	++
14_50585012_A_T			198.0	-2.257	0.02399	--
8_95782690_C_T			72.0	2.191	0.02847	+?
5_133561339_A_G			72.0	-2.363	0.01811	-?
11_132179950_CAAA_CA			126.0	-2.455	0.01408	?-
20_279614_A_T			126.0	2.183	0.02902	?+
4_107279499_C_T			72.0	2.227	0.02592	+?
5_75964462_T_A			198.0	2.407	0.01608	++
2_63815206_A_G			72.0	-2.257	0.02402	-?
19_45381300_A_C			72.0	2.666	0.007667	+?
10_97453703_A_C			198.0	2.441	0.01465	++
17_7228479_C_T			198.0	-2.264	0.02358	--
2_101889938_CTTT_TTTT			72.0	-2.331	0.01977	-?
15_20875142_T_C			72.0	2.303	0.02127	+?
19_49416504_G_C			72.0	-2.249	0.0245	-?
18_21044607_G_A			198.0	-2.84	0.00451	--
18_28898294_A_G			198.0	-3.242	0.001187	--
2_231742864_G_A			198.0	-2.217	0.0266	--
1_204889575_TC_T			72.0	2.236	0.02533	+?
16_16263955_G_T			72.0	-2.302	0.02135	-?
1_67098664_G_A			72.0	-2.522	0.01168	-?
1_156737969_C_T			198.0	-2.216	0.02671	--
13_32866221_A_G			72.0	2.288	0.02214	+?
16_19648913_C_T			72.0	2.301	0.02139	+?
17_10438691_C_T			198.0	2.395	0.01661	++
9_1057351_A_C			72.0	-3.232	0.00123	-?
7_130148817_G_A			72.0	-2.292	0.02193	-?
19_10824431_C_T			72.0	-2.535	0.01124	-?
19_45296942_C_CCTGGACTCCTGGGTCTGAGGGAGGAAGGGCTGGGGT			198.0	2.513	0.01196	++
19_7763703_A_G			198.0	2.263	0.0236	++
15_42492180_A_AAAAC			72.0	2.204	0.0275	+?
16_1420487_A_G			72.0	-2.355	0.01852	-?
7_135390764_AGGGGGTCCTG_A			72.0	-2.467	0.01363	-?
5_169361595_A_G			72.0	-2.177	0.02947	-?
7_2987193_G_A			198.0	2.596	0.009437	++
1_161168004_C_T			198.0	2.842	0.004488	++
19_9024758_T_C			198.0	2.229	0.02579	++
9_70144427_A_G			72.0	-2.578	0.009932	-?
11_18301915_A_G			72.0	3.138	0.001701	+?
17_71203990_T_G			72.0	-2.422	0.01544	-?
1_206766825_CGA_AGA			72.0	2.341	0.01923	+?
2_9475337_A_G			198.0	-2.267	0.02341	--
11_35336535_C_T			198.0	2.416	0.0157	++
2_135911422_T_C			198.0	2.576	0.009986	++
19_22952111_A_G			198.0	-2.247	0.02465	--
16_29823202_A_G			72.0	2.522	0.01169	+?
17_7754295_TCCTCTG_T			198.0	2.841	0.004494	++
17_74275160_C_T			198.0	-2.231	0.02569	--
17_18005247_A_C			126.0	2.181	0.02916	?+
19_35530073_T_C			198.0	2.777	0.005492	++
5_4930181_C_T			72.0	2.458	0.01397	+?
1_27660731_G_C			198.0	-2.482	0.01307	--
17_4441101_G_A			198.0	2.187	0.02873	++
1_3394871_C_T			72.0	2.227	0.02592	+?
19_48229732_TTCC_T			72.0	2.293	0.02183	+?
8_3141551_G_C			72.0	-2.249	0.0245	-?
1_11106909_C_T			198.0	2.217	0.0266	++
7_146817924_G_T			72.0	2.571	0.01013	+?
8_65290552_T_G			126.0	2.621	0.008762	?+
5_1232775_T_A			72.0	-2.624	0.008678	-?
8_87616311_T_A			72.0	2.569	0.01021	+?
1_26508997_C_T			72.0	2.373	0.01767	+?
4_113568149_G_A			72.0	-2.62	0.008794	-?
1_5933530_A_G			72.0	-3.159	0.001586	-?
22_51135451_G_C			72.0	-2.292	0.02188	-?
2_113672665_A_G			72.0	2.474	0.01338	+?
19_41354442_C_G			72.0	-2.473	0.01341	-?
6_123586300_C_A			72.0	-2.306	0.02112	-?
5_140057657_C_T			198.0	-2.4	0.01638	--
12_120567406_C_A			72.0	-2.829	0.004675	-?
9_36198970_G_A			72.0	-2.41	0.01596	-?
4_126402921_T_G			198.0	2.195	0.02817	++
1_160920966_C_T			198.0	-2.627	0.008622	--
6_152536374_T_A			72.0	2.318	0.02046	+?
18_21957382_C_CAATT			126.0	-2.321	0.0203	?-
12_111951476_GA_AA			72.0	-2.398	0.01647	-?
3_126158244_T_C			72.0	2.16	0.03074	+?
11_72293165_A_C			72.0	2.279	0.02266	+?
8_133759051_G_A			72.0	-2.306	0.02113	-?
19_44172065_T_C			72.0	-2.679	0.007376	-?
10_134237425_A_G			72.0	2.652	0.008	+?
2_183848114_T_C			198.0	-2.778	0.005477	--
12_111758620_A_G			198.0	-2.402	0.01632	--
6_28872446_T_C			198.0	-2.402	0.01632	--
19_17015428_G_A			198.0	2.236	0.02537	++
5_78610460_A_C			198.0	-2.255	0.02414	--
22_17979626_C_T			198.0	2.643	0.008213	++
3_69036678_G_C			198.0	-2.266	0.02347	--
15_74364655_A_G			198.0	-2.514	0.01193	--
3_195489930_C_T			72.0	3.001	0.002691	+?
19_45754815_CGGCCG_C			126.0	2.422	0.01545	?+
2_190541861_G_T			198.0	-2.644	0.008204	--
22_28292667_G_A			198.0	-2.271	0.02312	--
1_237798342_G_A			198.0	2.953	0.00315	++
3_180397793_G_C			72.0	2.538	0.01114	+?
6_83841827_T_G			72.0	2.332	0.01971	+?
20_61460124_G_A			198.0	-2.764	0.005712	+-
19_7675877_T_C			198.0	-3.487	0.0004879	--
6_43738977_C_T			198.0	2.204	0.02751	++
1_153391729_G_A			198.0	-2.263	0.02361	--
X_23697485_G_A			72.0	3.099	0.001939	+?
7_90742168_GGA_GGAGAGA			72.0	-2.638	0.008338	-?
12_40876930_A_G			198.0	-2.237	0.02531	--
14_68193731_G_A			198.0	2.188	0.02868	++
18_77475187_T_TGGA			198.0	-2.397	0.01654	--
11_13030652_G_C			72.0	-2.177	0.02949	-?
1_109774621_C_A			72.0	-2.185	0.02888	-?
6_38875752_A_G			198.0	-2.306	0.0211	--
X_106219966_G_A			72.0	-2.234	0.02551	-?
8_82598311_C_A			72.0	-2.352	0.01868	-?
15_65107804_G_T			72.0	3.008	0.002634	+?
11_46924095_G_A			72.0	2.555	0.01061	+?
22_23161843_TCC_T			72.0	2.451	0.01423	+?
14_81574687_T_TTCTC			126.0	2.298	0.02155	?+
14_106539009_C_T			72.0	2.248	0.02459	+?
7_138602523_T_C			198.0	2.511	0.01206	++
16_22588087_G_C			72.0	2.508	0.01214	+?
17_36398164_ACC_CCC			72.0	-2.327	0.01997	-?
17_78191036_C_T			198.0	2.167	0.03023	++
20_3211719_T_G			198.0	2.406	0.01613	++
13_111102865_G_A			198.0	2.571	0.01014	++
11_61111346_C_G			198.0	2.806	0.005013	++
8_25317691_A_T			72.0	-2.538	0.01114	-?
18_12982759_T_A			72.0	2.302	0.02131	+?
6_46867717_C_T			198.0	2.197	0.02804	-+
22_36919375_G_C			198.0	3.492	0.0004798	++
3_195347059_C_T			72.0	-2.218	0.02655	-?
3_179691094_G_A			198.0	3.392	0.000695	++
17_13399497_C_T			72.0	-2.439	0.01471	-?
10_63196023_G_A			72.0	-2.962	0.003053	-?
4_54248418_A_G			198.0	2.195	0.02814	++
4_70276683_T_C			72.0	-2.774	0.005534	-?
4_156706506_T_G			198.0	2.352	0.01865	++
8_124031178_G_A			72.0	2.386	0.01702	+?
6_28227633_C_T			198.0	-2.4	0.0164	--
19_9084216_T_C			198.0	2.477	0.01325	++
1_211452728_G_A			198.0	2.343	0.01911	++
1_144874835_G_A			198.0	-2.369	0.01784	--
14_102025158_C_T			72.0	2.908	0.00364	+?
1_59042001_G_A			198.0	2.35	0.01875	++
10_97725902_C_G			198.0	2.946	0.003222	++
9_138927396_A_G			72.0	2.574	0.01006	+?
18_5890571_T_C			198.0	2.371	0.01773	++
12_96384122_T_C			198.0	2.477	0.01325	++
2_80646849_T_G			72.0	2.42	0.01551	+?
19_10689711_C_T			72.0	-2.22	0.0264	-?
6_32557602_C_T			72.0	-2.22	0.0264	-?
1_92108976_T_C			72.0	2.413	0.01582	+?
6_159046076_T_G			198.0	-2.3	0.02146	--
15_102295054_C_T			72.0	2.257	0.02402	+?
17_80085341_A_G			72.0	2.556	0.01059	+?
11_7961146_A_G			72.0	2.568	0.01023	+?
1_33138516_A_C			72.0	2.231	0.02566	+?
1_155934932_A_G			198.0	2.633	0.008474	++
11_25100071_C_T			198.0	2.4	0.01641	++
4_20544053_A_C			198.0	-2.955	0.003125	--
16_5128857_G_C			198.0	2.171	0.02996	++
4_57861358_C_T			198.0	2.552	0.01072	++
1_203453306_C_G			126.0	-2.784	0.005362	?-
3_53910120_AAG_A			72.0	2.174	0.02973	+?
17_4448290_G_C			72.0	2.199	0.02789	+?
2_29356669_A_G			198.0	-3.629	0.0002851	--
16_1997113_G_A			198.0	-2.508	0.01214	--
2_234703136_T_C			198.0	-2.414	0.0158	--
17_48432324_G_C			198.0	2.892	0.003832	++
10_129207564_C_T			198.0	2.781	0.005425	++
17_71197748_G_A			198.0	2.225	0.02606	++
8_133144346_A_G			72.0	-2.459	0.01395	-?
1_160920809_A_G			198.0	-2.733	0.006275	--
19_48284025_C_CG			198.0	2.289	0.02209	++
12_70330063_C_T			72.0	-2.249	0.0245	-?
14_74341124_G_A			72.0	-2.204	0.0275	-?
22_47311801_A_G			198.0	-2.168	0.03017	--
21_47407362_C_T			198.0	2.166	0.03034	++
6_101311921_G_A			72.0	-2.366	0.018	-?
15_22368957_C_T			198.0	-2.508	0.01213	--
2_70068014_G_T			126.0	-2.494	0.01264	?-
7_47546546_G_GA			72.0	-2.659	0.007843	-?
11_65107779_T_C			72.0	-2.263	0.02363	-?
1_152281304_A_C			198.0	-2.886	0.003904	--
8_11614313_A_G			72.0	-2.614	0.008951	-?
5_176936819_C_G			198.0	-2.437	0.0148	--
7_66136549_G_A			72.0	2.411	0.01591	+?
4_90170094_G_A			198.0	-2.568	0.01024	--
8_30416741_A_G			72.0	-2.293	0.02187	-?
15_31048241_A_G			72.0	-2.662	0.007769	-?
11_67264679_C_T			198.0	-3.416	0.0006345	--
7_75070642_C_T			198.0	2.429	0.01514	++
7_24903139_C_T			198.0	2.221	0.02637	++
19_44947050_T_C			198.0	2.413	0.01583	++
1_53738419_C_T			72.0	3.151	0.001627	+?
21_37664544_C_T			72.0	-3.446	0.0005695	-?
10_61871430_C_G			198.0	2.176	0.02954	++
12_10218309_A_C			72.0	2.298	0.02155	+?
10_50684228_A_G			198.0	2.326	0.02001	++
1_1392440_T_C			72.0	2.863	0.00419	+?
8_145060112_G_A			198.0	-2.228	0.02588	--
10_27539137_T_C			72.0	-2.261	0.02376	-?
13_19447663_T_C			72.0	2.183	0.02905	+?
5_63256995_G_A			198.0	-2.344	0.01907	--
22_46763123_C_T			72.0	-2.281	0.02255	-?
22_37196971_C_A			198.0	2.31	0.02087	++
5_150051779_G_C			72.0	-2.532	0.01135	-?
3_15455717_A_G			198.0	2.672	0.00753	++
9_34655629_C_T			198.0	2.276	0.02285	++
6_36978745_G_A			198.0	-2.591	0.00956	--
9_36058802_CT_CTT			126.0	2.702	0.006883	?+
1_89408588_T_C			72.0	2.279	0.02266	+?
X_2825754_T_A			72.0	-2.798	0.005147	-?
5_1036616_CAA_CA			72.0	2.664	0.007715	+?
16_89644178_C_A			72.0	2.204	0.0275	+?
20_61443636_G_A			198.0	-2.254	0.0242	+-
6_43193318_G_T			72.0	-2.376	0.01752	-?
9_390636_A_G			198.0	-3.689	0.0002253	--
3_16645871_G_C			72.0	-2.199	0.02785	-?
19_10217338_C_T			72.0	2.301	0.02139	+?
7_50683678_A_G			72.0	-2.975	0.002933	-?
10_27538071_T_C			72.0	-2.261	0.02376	-?
Y_13489396_C_T			72.0	2.593	0.00951	+?
18_29489487_T_C			72.0	-2.177	0.02945	-?
19_17301880_T_C			198.0	-2.327	0.01995	--
15_102294992_C_G			72.0	2.444	0.01452	+?
12_46758494_A_G			198.0	2.991	0.002777	++
5_42769647_T_C			198.0	2.982	0.002865	++
5_161529571_A_G			72.0	2.188	0.02866	+?
22_28394985_C_T			198.0	-2.271	0.02312	--
1_65886448_T_C			198.0	2.523	0.01162	++
7_120764573_C_A			198.0	-2.215	0.02679	--
15_30008977_T_G			198.0	2.969	0.002988	++
22_31018975_T_C			198.0	2.348	0.01887	++
2_15698614_T_C			72.0	-2.364	0.01807	-?
10_17196670_T_C			198.0	-2.298	0.02156	--
17_7193448_A_G			198.0	2.407	0.0161	++
7_154645576_C_T			198.0	-2.626	0.008628	--
11_7686493_G_C			72.0	2.543	0.011	+?
4_75025634_G_A			72.0	2.257	0.02402	+?
13_109496636_G_A			72.0	-2.424	0.01534	-?
7_23530067_G_A			126.0	-2.472	0.01343	?-
9_93629748_C_T			72.0	-2.278	0.02274	-?
6_33236514_CCT_C			72.0	-2.218	0.02652	-?
4_153303509_C_T			126.0	2.273	0.02304	?+
7_100465439_T_C			198.0	-2.173	0.02976	--
12_88453608_C_T			198.0	-2.353	0.0186	--
10_71685532_G_C			198.0	-2.393	0.01669	--
15_102302390_A_G			72.0	2.258	0.02392	+?
19_51430496_C_T			72.0	2.204	0.0275	+?
2_234740758_A_G			198.0	-3.045	0.002323	--
16_72056384_G_A			72.0	2.196	0.02806	+?
12_21602788_C_T			72.0	-2.522	0.01169	-?
4_4190595_G_C			126.0	-2.632	0.008491	?-
11_107328544_G_A			198.0	2.381	0.01726	++
18_6889973_A_G			198.0	2.603	0.009238	++
12_80648803_CT_C			198.0	2.346	0.01897	++
22_22707299_A_C			72.0	-2.699	0.006958	-?
22_21481528_G_A			72.0	-2.549	0.01081	-?
8_10383226_C_G			198.0	-2.304	0.02122	--
5_146258290_AGCT_AGCTGCTGCTGCTGCT			126.0	2.702	0.006894	?+
2_202342802_T_C			198.0	-2.959	0.003087	--
9_100105909_TA_T			198.0	2.217	0.02665	++
14_58697721_C_T			72.0	2.506	0.01222	+?
X_65247101_T_C			72.0	2.437	0.01481	+?
2_175992074_T_C			72.0	-2.225	0.02611	-?
16_57609000_C_G			198.0	3.099	0.00194	++
19_1986414_G_A			198.0	2.368	0.01787	-+
6_32820799_C_A			198.0	2.893	0.003813	++
2_174943876_C_T			198.0	2.337	0.01946	++
4_8235220_C_A			126.0	-2.168	0.03012	?-
12_42737665_G_A			72.0	-2.565	0.01032	-?
1_113240790_G_T			198.0	2.211	0.02704	-+
22_20101434_G_A			72.0	-2.162	0.03064	-?
3_150690439_T_A			198.0	-2.172	0.02987	--
19_11447932_A_C			72.0	2.527	0.0115	+?
2_113671198_T_C			72.0	2.474	0.01338	+?
19_14192438_C_CT			72.0	-2.246	0.02471	-?
11_108594237_G_A			198.0	-2.223	0.02621	--
22_42969924_A_C			198.0	-2.213	0.02688	--
4_7717012_G_A			198.0	-2.175	0.02964	--
13_110817641_A_G			72.0	2.555	0.01062	+?
13_110830787_C_T			72.0	2.525	0.01156	+?
15_59397443_G_A			72.0	2.204	0.0275	+?
7_73668049_TA_T			72.0	-2.183	0.02905	-?
19_44977071_C_T			72.0	2.466	0.01367	+?
2_139045866_C_T			72.0	-2.315	0.02059	-?
16_57470564_G_C			198.0	2.425	0.01531	++
6_44144092_C_T			198.0	-2.192	0.0284	--
19_14806017_G_C			198.0	-2.608	0.009097	--
2_179407763_CTT_C			198.0	-2.912	0.00359	--
6_29912342_G_A			198.0	2.348	0.01886	-+
1_32122424_TAA_TA			72.0	2.84	0.004505	+?
16_2837592_T_G			72.0	2.2	0.02778	+?
5_150646888_T_C			198.0	-2.446	0.01444	--
20_61432216_C_T			198.0	-2.642	0.008235	--
8_2057131_T_G			198.0	-2.579	0.009898	--
15_102416490_T_C			72.0	2.795	0.005185	+?
6_29912208_G_C			198.0	2.348	0.01886	-+
4_15724487_T_G			198.0	-2.442	0.0146	--
2_233712226_CACAGCA_CGCA			198.0	2.56	0.01047	++
6_34507004_C_T			198.0	-2.798	0.005148	--
3_49702344_T_G			72.0	2.182	0.02911	+?
21_33964722_CA_C			72.0	2.405	0.01617	+?
6_112671611_G_A			198.0	2.586	0.009701	++
2_96617237_TAACAGG_T			72.0	-2.331	0.01974	-?
11_20067064_C_T			198.0	-2.161	0.0307	--
1_248167072_T_G			72.0	-3.112	0.001859	-?
1_147400824_A_C			72.0	-2.631	0.008512	-?
17_48431021_G_A			198.0	-2.256	0.02408	--
1_167893778_G_GA			126.0	2.504	0.01227	?+
19_54783128_A_G			72.0	-2.691	0.007133	-?
1_119923531_A_C			72.0	-2.538	0.01113	-?
15_22741040_G_A			72.0	2.332	0.01971	+?
9_136131651_G_A			198.0	2.382	0.01722	++
15_48766250_G_C			72.0	-2.309	0.02093	-?
3_44488656_C_A			72.0	2.274	0.02299	+?
17_7751388_C_A			198.0	2.841	0.004494	++
13_92345579_C_T			198.0	-2.89	0.003856	--
22_18918825_T_C			72.0	2.431	0.01504	+?
16_72007399_C_T			198.0	-2.229	0.02579	--
12_133319967_T_A			72.0	-2.203	0.02759	-?
15_30899336_G_C			198.0	-2.215	0.02676	--
1_28832697_G_A			72.0	2.235	0.02541	+?
8_145748753_A_C			198.0	2.858	0.004263	++
14_20763446_T_C			198.0	-2.251	0.0244	--
20_4842776_C_T			198.0	2.185	0.02888	++
6_76660271_C_T			198.0	2.46	0.01388	++
1_220191555_C_T			126.0	2.314	0.02068	?+
6_34839097_A_G			72.0	-2.252	0.0243	-?
1_152277822_T_C			198.0	-2.19	0.02852	+-
11_12379949_C_T			198.0	-2.364	0.01808	--
19_1115934_G_T			72.0	-2.162	0.03064	-?
3_123634046_G_A			198.0	2.655	0.007935	++
19_57802089_C_T			72.0	-2.336	0.01949	-?
1_26529061_G_A			198.0	-2.535	0.01126	--
2_137917738_A_T			72.0	3.707	0.0002095	+?
4_3451109_G_A			198.0	2.433	0.01499	++
7_75368110_C_T			198.0	-2.197	0.02804	+-
22_16157883_T_C			72.0	2.5	0.01243	+?
19_35994376_GTT_G			198.0	-2.503	0.0123	--
7_66721208_C_T			72.0	2.241	0.02501	+?
5_150056307_C_A			72.0	-2.385	0.01707	-?
2_271797_G_A			198.0	2.362	0.01819	++
14_64691320_A_G			198.0	2.243	0.02488	++
6_32557346_C_A			72.0	2.423	0.0154	+?
8_37888017_C_G			198.0	2.994	0.002752	++
10_127843973_CT_C			72.0	-2.401	0.01636	-?
10_11805204_A_C			198.0	2.293	0.02185	++
14_61952133_A_G			72.0	2.627	0.008606	+?
17_76503560_C_A			198.0	-2.208	0.02724	--
9_73240026_T_C			72.0	-2.429	0.01513	-?
19_55286767_G_T			72.0	2.355	0.01852	+?
22_30772204_A_C			126.0	2.382	0.01723	?+
5_153789078_C_G			198.0	-2.532	0.01134	--
2_132266246_T_C			72.0	-2.537	0.01118	-?
1_144863401_T_C			198.0	2.253	0.02424	++
4_48148435_G_A			198.0	-2.991	0.002785	--
18_55317837_G_A			72.0	-2.548	0.01083	-?
17_5072333_T_G			198.0	2.179	0.02933	++
10_7811407_G_C			72.0	2.711	0.006716	+?
19_9021328_G_A			72.0	2.219	0.0265	+?
12_114358607_C_A			72.0	-2.328	0.01989	-?
1_13013363_T_C			72.0	2.253	0.02428	+?
2_107039737_G_A			198.0	2.428	0.0152	++
12_11904223_A_G			72.0	2.555	0.01061	+?
14_81304508_T_A			72.0	-2.239	0.02518	-?
11_67786398_T_C			198.0	-2.252	0.02431	--
8_95800323_ATT_A			72.0	2.359	0.01833	+?
10_20357183_A_G			198.0	-2.566	0.01029	--
9_5892525_C_T			198.0	2.261	0.02374	++
19_56702323_C_T			198.0	2.56	0.01048	++
1_6500671_G_C			198.0	-2.433	0.01497	--
10_15650186_C_G			72.0	-2.45	0.01429	-?
17_74540917_A_C			198.0	-2.496	0.01257	--
9_14770580_G_A			198.0	2.376	0.0175	++
12_15777273_C_T			126.0	-2.224	0.02615	?-
11_18735753_G_A			198.0	-2.172	0.02982	--
20_45891189_T_C			198.0	-2.224	0.02614	--
19_49657531_G_GGTGCCTGTGGGCCTGGTGTCCATACTCAGTGGAGACATCATCATCATCATCATCATCTTCTTCTTCTTCTTTGTGGCCTCGGTGCCTGTGGCTGGGGCTGTGATGGTGGTGTTCATCGGAGACATCCTCATCCTCTTCCTTTCTGTGACCTCC			72.0	2.684	0.007284	+?
2_211074909_T_C			198.0	-2.324	0.02014	--
6_169115701_G_GAT			72.0	2.387	0.01699	+?
19_45922323_G_T			198.0	-2.338	0.01938	--
22_16414550_A_T			72.0	-2.216	0.02668	-?
20_44803487_G_C			198.0	-2.161	0.03069	--
19_51190682_GAC_G			72.0	2.227	0.02592	+?
5_145500157_A_G			72.0	2.367	0.01796	+?
17_18682677_CTTT_CTTTT			72.0	-2.295	0.02173	-?
4_143350448_C_T			72.0	-2.427	0.01521	-?
17_10555049_TTTA_T			198.0	-2.706	0.00682	--
22_25573514_C_T			198.0	2.506	0.01221	++
16_81199520_T_C			198.0	2.681	0.007333	++
1_9658492_C_G			198.0	-2.893	0.00382	--
19_55492902_G_C			72.0	2.405	0.01616	+?
11_73007462_G_A			198.0	2.209	0.02718	++
2_113670475_A_G			72.0	2.474	0.01338	+?
9_130996575_T_C			72.0	2.2	0.0278	+?
17_73585072_C_G			126.0	2.741	0.006122	?+
12_102008103_TGA_AGA			72.0	-2.53	0.01141	-?
6_42932347_G_GT			72.0	2.306	0.02109	+?
10_49659842_C_T			72.0	-2.189	0.02863	-?
5_55252984_CAA_CAAA			126.0	-2.535	0.01124	?-
1_18691614_T_C			72.0	-2.5	0.01242	-?
16_89574945_G_A			126.0	-2.293	0.02182	?-
3_52868670_G_A			72.0	2.642	0.00823	+?
3_115535432_T_C			198.0	-2.441	0.01465	--
20_47956712_TAA_T			72.0	2.33	0.01978	+?
8_89046557_C_T			198.0	2.24	0.02509	++
7_30880413_G_A			198.0	2.334	0.01959	++
5_169021610_C_T			198.0	2.686	0.007231	++
19_10600442_G_C			198.0	2.473	0.01341	-+
7_128480791_C_G			198.0	2.609	0.009076	++
18_47623811_A_G			72.0	2.298	0.02154	+?
X_40460040_T_C			72.0	-2.533	0.01129	-?
4_109735133_T_C			198.0	2.593	0.009526	++
4_62775272_T_G			72.0	-2.547	0.01086	-?
6_41204094_C_G			72.0	-2.179	0.0293	-?
2_179358665_A_G			198.0	-2.278	0.0227	--
17_71223837_C_T			198.0	2.23	0.02577	++
2_179464527_T_C			198.0	-2.7	0.00694	--
10_72534212_C_T			72.0	-2.832	0.004633	-?
1_6269768_T_G			72.0	2.678	0.007397	+?
22_22973384_A_G			72.0	2.733	0.006278	+?
6_139165602_G_A			72.0	2.227	0.02592	+?
2_171260797_A_G			198.0	2.419	0.01558	++
7_44084117_C_G			72.0	2.177	0.02951	+?
16_69363805_C_T			72.0	2.242	0.02498	+?
11_372157_C_T			198.0	2.355	0.01852	++
1_3701580_G_C			198.0	-2.664	0.007726	--
1_67242087_G_A			198.0	-3.431	0.0006005	--
16_19501667_C_T			72.0	2.165	0.0304	+?
8_101719227_T_TGGCACCCTGAGCAGTCCA			198.0	-2.919	0.003512	--
13_33332227_G_T			72.0	-2.439	0.01472	-?
12_112147538_C_A			72.0	2.279	0.02266	+?
4_70512787_A_T			198.0	2.259	0.02386	++
15_27586134_G_A			72.0	2.178	0.02938	+?
17_73585678_T_C			126.0	2.536	0.01122	?+
2_131220742_C_G			72.0	-2.237	0.02531	-?
19_11461486_G_T			198.0	2.21	0.02712	++
8_134271521_G_C			198.0	2.721	0.006508	++
11_111724133_C_T			198.0	-2.38	0.01731	--
10_99504595_G_A			198.0	-2.368	0.01789	--
1_153631198_T_C			72.0	2.257	0.02402	+?
1_156096376_G_A			198.0	-2.826	0.004708	--
9_8484039_C_T			72.0	2.417	0.01565	+?
20_3063161_T_C			72.0	-2.437	0.01483	-?
7_35129818_T_A			72.0	-2.563	0.01038	-?
14_105609005_G_A			198.0	2.292	0.02193	++
X_106959887_T_G			126.0	2.585	0.009728	?+
12_49522745_A_G			72.0	2.301	0.02139	+?
14_19553963_G_A			198.0	-3.021	0.002523	--
20_44420637_G_A			198.0	2.196	0.02811	++
5_21817206_T_C			198.0	2.286	0.02225	++
19_57832089_G_T			72.0	2.239	0.02517	+?
15_29998002_T_C			198.0	2.969	0.002988	++
5_65350044_A_G			198.0	-2.586	0.009709	--
16_14966223_G_A			198.0	-3.736	0.0001872	--
3_52518499_CTG_C			72.0	2.236	0.02533	+?
18_29450527_G_A			198.0	-3.007	0.002638	--
16_4519548_A_G			72.0	2.911	0.003604	+?
4_39511359_T_C			198.0	2.377	0.01747	++
15_65235500_A_T			72.0	-2.543	0.011	-?
7_50673363_G_A			72.0	-2.605	0.009184	-?
3_195029500_T_C			198.0	2.178	0.02942	++
2_114256759_A_G			198.0	3.42	0.0006263	++
16_88870967_T_C			198.0	-2.487	0.01287	--
2_102505434_A_G			198.0	2.184	0.02895	++
11_134121261_G_C			72.0	-2.492	0.0127	-?
16_71318577_T_C			198.0	2.618	0.008832	++
21_46058034_G_A			198.0	2.464	0.01374	++
1_917492_C_T			198.0	-2.165	0.03042	--
19_11426797_T_G			72.0	-2.174	0.02971	-?
3_69246129_A_G			72.0	-2.216	0.02671	-?
11_74800138_G_A			198.0	2.437	0.01479	++
19_3150300_C_T			72.0	2.186	0.02885	+?
[truncated: 8,001 more rows]
