# Supplementary material for: Genomic Markers Associated with Cytomegalovirus DNAemia in Kidney Transplant Recipients
Source: Viruses. 2023 Nov 8;15(11):2227. doi: 10.3390/v15112227 (PMC10674338; doi:10.3390/v15112227)
Supplement: Supplementary file 1 [file viruses-15-02227-s001.zip › S5_cnv.results.tsv]

ENSEMBL	SYMBOL	GENENAME	GENETYPE	ENTREZID	start	end	CHROM	STRAND	gene_length	A_loss	B_loss	A_gain	B_gain	A	B	loss	gain	overall	p	fdr
ENSG00000134184	GSTM1	glutathione S-transferase mu 1	protein-coding	2944	110230442	110251307	1	+	20865	17	0	0	0	17	0	17	0	17	1.5258789062499993e-5	0.0020568847656249993
ENSG00000213366	GSTM2	glutathione S-transferase mu 2	protein-coding	2946	110210644	110252171	1	+	41527	17	0	0	0	17	0	17	0	17	1.5258789062499993e-5	0.0020568847656249993
ENSG00000187238	LCE3B	late cornified envelope 3B	protein-coding	353143	152586287	152586574	1	+	287	12	16	0	0	12	16	28	0	28	7.450580596923826e-9	2.5108456611633292e-6
ENSG00000244057	LCE3C	late cornified envelope 3C	protein-coding	353144	152573138	152573562	1	+	424	13	15	0	0	13	15	28	0	28	7.450580596923826e-9	2.5108456611633292e-6
ENSG00000255374	TAS2R43	taste 2 receptor member 43	protein-coding	259289	11243886	11244912	12	-	1026	5	13	0	0	5	13	18	0	18	7.629394531249994e-6	0.001714070638020832
ENSG00000113303	BTNL8	butyrophilin like 8	protein-coding	79908	180326077	180377906	5	+	51829	1	9	0	0	1	9	10	0	10	0.0019531250000000004	0.09402901785714289
ENSG00000168903	BTNL3	butyrophilin like 3	protein-coding	10917	180415845	180433727	5	+	17882	1	9	0	0	1	9	10	0	10	0.0019531250000000004	0.09402901785714289
ENSG00000185567	AHNAK2	AHNAK nucleoprotein 2	protein-coding	113146	105403590	105444694	14	-	41104	9	3	0	0	9	3	12	0	12	4.882812500000001e-4	0.02991832386363637
ENSG00000214776	NA	NA	NA	NA	NA	NA	NA	NA	NA	8	0	0	0	8	0	8	0	8	0.0078125	0.13501602564102563
ENSG00000266633	NA	NA	NA	NA	NA	NA	NA	NA	NA	8	0	4	0	12	0	8	4	12	0.3876953124999998	1
ENSG00000183038	NA	NA	NA	NA	NA	NA	NA	NA	NA	0	0	7	6	7	6	0	13	13	2.4414062500000005e-4	0.016455078125000005
ENSG00000184674	NA	NA	NA	NA	NA	NA	NA	NA	NA	7	0	0	0	7	0	7	0	7	0.015625000000000007	0.15262681159420297
ENSG00000204918	PRR20B	proline rich 20B	protein-coding	729233	57721622	57724643	13	+	3021	1	0	7	3	8	3	1	10	11	0.011718750000000002	0.15262681159420297
ENSG00000204919	PRR20A	proline rich 20A	protein-coding	122183	57715052	57718073	13	+	3021	1	0	7	3	8	3	1	10	11	0.011718750000000002	0.15262681159420297
ENSG00000215513	NA	NA	NA	NA	NA	NA	NA	NA	NA	0	0	7	6	7	6	0	13	13	2.4414062500000005e-4	0.016455078125000005
ENSG00000223443	USP17L2	ubiquitin specific peptidase 17 like family member 2	protein-coding	377630	11994677	11996586	8	-	1909	3	6	4	7	7	13	9	11	20	0.8238029479980473	1
ENSG00000224676	NA	NA	NA	NA	NA	NA	NA	NA	NA	7	0	0	0	7	0	7	0	7	0.015625000000000007	0.15262681159420297
ENSG00000227151	PRR20D	proline rich 20D	protein-coding	729246	57734766	57737787	13	+	3021	1	0	7	3	8	3	1	10	11	0.011718750000000002	0.15262681159420297
ENSG00000229665	PRR20C	proline rich 20C	protein-coding	729240	57728195	57731216	13	+	3021	1	0	7	3	8	3	1	10	11	0.011718750000000002	0.15262681159420297
ENSG00000229859	PGA3	pepsinogen A3	protein-coding	643834	60970852	60980570	11	+	9718	0	2	1	7	1	9	2	8	10	0.10937499999999994	0.6633858267716537
ENSG00000234278	PRR20E	proline rich 20E	protein-coding	729250	57741331	57744352	13	+	3021	1	0	7	1	8	1	1	8	9	0.039062499999999986	0.29582162921348304
ENSG00000252024	NA	NA	NA	NA	NA	NA	NA	NA	NA	0	0	7	6	7	6	0	13	13	2.4414062500000005e-4	0.016455078125000005
ENSG00000252571	NA	NA	NA	NA	NA	NA	NA	NA	NA	0	0	7	6	7	6	0	13	13	2.4414062500000005e-4	0.016455078125000005
ENSG00000271796	NA	NA	NA	NA	NA	NA	NA	NA	NA	0	0	7	6	7	6	0	13	13	2.4414062500000005e-4	0.016455078125000005
ENSG00000272955	NA	NA	NA	NA	NA	NA	NA	NA	NA	7	0	0	0	7	0	7	0	7	0.015625000000000007	0.15262681159420297
ENSG00000117616	RSRP1	arginine and serine rich protein 1	protein-coding	57035	25568728	25664704	1	-	95976	0	6	0	0	0	6	6	0	6	0.03125000000000001	0.24209770114942533
ENSG00000167633	KIR3DL1	killer cell immunoglobulin like receptor, three Ig domains and long cytoplasmic tail 1	protein-coding	3811	55235969	55378448	19	+	142479	6	1	0	0	6	1	7	0	7	0.015625000000000007	0.15262681159420297
ENSG00000172188	OR4C11	olfactory receptor family 4 subfamily C member 11	protein-coding	219429	55370830	55371874	11	-	1044	3	6	0	0	3	6	9	0	9	0.0039062500000000035	0.09751157407407415
ENSG00000174876	AMY1B	amylase alpha 1B	protein-coding	277	104230037	104239302	1	-	9265	1	1	6	3	7	4	2	9	11	0.06542968750000004	0.42815154733009736
ENSG00000174982	OR4S2	olfactory receptor family 4 subfamily S member 2	protein-coding	219431	55418380	55419315	11	+	935	3	6	0	0	3	6	9	0	9	0.0039062500000000035	0.09751157407407415
ENSG00000181927	OR4P4	olfactory receptor family 4 subfamily P member 4	protein-coding	81300	55405834	55406772	11	+	938	3	6	0	0	3	6	9	0	9	0.0039062500000000035	0.09751157407407415
ENSG00000187010	RHD	Rh blood group D antigen	protein-coding	6007	25598884	25656936	1	+	58052	0	6	0	1	0	7	6	1	7	0.12500000000000003	0.6633858267716537
ENSG00000187733	AMY1C	amylase alpha 1C	protein-coding	278	104293028	104301312	1	+	8284	0	1	6	3	6	4	1	9	10	0.021484375000000014	0.20686383928571442
ENSG00000187979	NA	NA	NA	NA	NA	NA	NA	NA	NA	0	0	6	2	6	2	0	8	8	0.0078125	0.13501602564102563
ENSG00000188424	NA	NA	NA	NA	NA	NA	NA	NA	NA	0	0	3	6	3	6	0	9	9	0.0039062500000000035	0.09751157407407415
ENSG00000196622	NA	NA	NA	NA	NA	NA	NA	NA	NA	0	0	5	6	5	6	0	11	11	9.765625e-4	0.054850260416666664
ENSG00000197888	UGT2B17	UDP glucuronosyltransferase family 2 member B17	protein-coding	7367	69402902	69434245	4	-	31343	6	4	2	0	8	4	10	2	12	0.038574218750000014	0.2954434481534092
ENSG00000237763	AMY1A	amylase alpha 1A	protein-coding	276	104197912	104207173	1	+	9261	1	1	6	3	7	4	2	9	11	0.06542968750000004	0.42815154733009736
ENSG00000250606	NA	NA	NA	NA	NA	NA	NA	NA	NA	6	0	0	0	6	0	6	0	6	0.03125000000000001	0.24209770114942533
ENSG00000257162	NA	NA	NA	NA	NA	NA	NA	NA	NA	0	0	6	3	6	3	0	9	9	0.0039062500000000035	0.09751157407407415
ENSG00000258027	NA	NA	NA	NA	NA	NA	NA	NA	NA	0	0	6	3	6	3	0	9	9	0.0039062500000000035	0.09751157407407415
ENSG00000258389	NA	NA	NA	NA	NA	NA	NA	NA	NA	0	0	6	0	6	0	0	6	6	0.03125000000000001	0.24209770114942533
ENSG00000258697	NA	NA	NA	NA	NA	NA	NA	NA	NA	0	0	6	0	6	0	0	6	6	0.03125000000000001	0.24209770114942533
ENSG00000258755	NA	NA	NA	NA	NA	NA	NA	NA	NA	0	0	6	0	6	0	0	6	6	0.03125000000000001	0.24209770114942533
ENSG00000258834	DUX4L4	double homeobox 4 like 4 (pseudogene)	pseudo	441056	191001979	191003777	4	+	1798	0	0	6	0	6	0	0	6	6	0.03125000000000001	0.24209770114942533
ENSG00000259034	NA	NA	NA	NA	NA	NA	NA	NA	NA	0	0	6	0	6	0	0	6	6	0.03125000000000001	0.24209770114942533
ENSG00000259063	NA	NA	NA	NA	NA	NA	NA	NA	NA	0	0	6	0	6	0	0	6	6	0.03125000000000001	0.24209770114942533
ENSG00000259128	NA	NA	NA	NA	NA	NA	NA	NA	NA	0	0	6	0	6	0	0	6	6	0.03125000000000001	0.24209770114942533
ENSG00000155249	OR4K1	olfactory receptor family 4 subfamily K member 1	protein-coding	79544	20403767	20404842	14	+	1075	0	0	5	3	5	3	0	8	8	0.0078125	0.13501602564102563
ENSG00000161103	LOC102725072	POM121 transmembrane nucleoporin pseudogene	pseudo	102725072	18834324	18839322	22	+	4998	0	0	5	2	5	2	0	7	7	0.015625000000000007	0.15262681159420297
ENSG00000165762	OR4K2	olfactory receptor family 4 subfamily K member 2	protein-coding	390431	20344391	20345468	14	+	1077	0	0	5	3	5	3	0	8	8	0.0078125	0.13501602564102563
ENSG00000176281	OR4K5	olfactory receptor family 4 subfamily K member 5	protein-coding	79317	20388741	20389818	14	+	1077	0	0	5	3	5	3	0	8	8	0.0078125	0.13501602564102563
ENSG00000176294	OR4N2	olfactory receptor family 4 subfamily N member 2	protein-coding	390429	20187174	20296531	14	+	109357	0	0	5	3	5	3	0	8	8	0.0078125	0.13501602564102563
ENSG00000176299	OR4M1	olfactory receptor family 4 subfamily M member 1	protein-coding	441670	20248401	20249516	14	+	1115	0	0	5	3	5	3	0	8	8	0.0078125	0.13501602564102563
ENSG00000182652	NA	NA	NA	NA	NA	NA	NA	NA	NA	0	0	5	3	5	3	0	8	8	0.0078125	0.13501602564102563
ENSG00000182824	FAM230E	family with sequence similarity 230 member E	ncRNA	642643	18721427	18745407	22	+	23980	0	0	5	2	5	2	0	7	7	0.015625000000000007	0.15262681159420297
ENSG00000182974	NA	NA	NA	NA	NA	NA	NA	NA	NA	0	0	5	3	5	3	0	8	8	0.0078125	0.13501602564102563
ENSG00000183706	OR4N4	olfactory receptor family 4 subfamily N member 4	protein-coding	283694	22382382	22383507	15	+	1125	0	0	5	4	5	4	0	9	9	0.0039062500000000035	0.09751157407407415
ENSG00000189013	KIR2DL4	killer cell immunoglobulin like receptor, two Ig domains and long cytoplasmic tail 4	protein-coding	3805	55236002	55325972	19	+	89970	5	1	0	0	5	1	6	0	6	0.03125000000000001	0.24209770114942533
ENSG00000197421	GGT3P	gamma-glutamyltransferase 3 pseudogene	pseudo	2679	18761338	18778736	22	-	17398	0	0	5	2	5	2	0	7	7	0.015625000000000007	0.15262681159420297
ENSG00000211940	NA	NA	NA	NA	NA	NA	NA	NA	NA	5	0	1	0	6	0	5	1	6	0.21875000000000008	0.8821989528795814
ENSG00000221641	MIR1268A	microRNA 1268a	ncRNA	100302233	22513229	22513280	15	-	51	0	0	5	4	5	4	0	9	9	0.0039062500000000035	0.09751157407407415
ENSG00000238492	NA	NA	NA	NA	NA	NA	NA	NA	NA	0	0	5	3	5	3	0	8	8	0.0078125	0.13501602564102563
ENSG00000238960	NA	NA	NA	NA	NA	NA	NA	NA	NA	0	0	5	3	5	3	0	8	8	0.0078125	0.13501602564102563
ENSG00000259176	NA	NA	NA	NA	NA	NA	NA	NA	NA	0	0	5	3	5	3	0	8	8	0.0078125	0.13501602564102563
ENSG00000259261	NA	NA	NA	NA	NA	NA	NA	NA	NA	0	0	5	4	5	4	0	9	9	0.0039062500000000035	0.09751157407407415
ENSG00000269182	NA	NA	NA	NA	NA	NA	NA	NA	NA	0	0	5	4	5	4	0	9	9	0.0039062500000000035	0.09751157407407415
ENSG00000270356	NA	NA	NA	NA	NA	NA	NA	NA	NA	0	0	5	4	5	4	0	9	9	0.0039062500000000035	0.09751157407407415
ENSG00000270505	NA	NA	NA	NA	NA	NA	NA	NA	NA	0	0	5	4	5	4	0	9	9	0.0039062500000000035	0.09751157407407415
ENSG00000271288	NA	NA	NA	NA	NA	NA	NA	NA	NA	0	0	5	4	5	4	0	9	9	0.0039062500000000035	0.09751157407407415
ENSG00000116785	CFHR3	complement factor H related 3	protein-coding	10878	196743925	196763203	1	+	19278	2	4	1	0	3	4	6	1	7	0.12500000000000003	0.6633858267716537
ENSG00000171847	FAM90A1	family with sequence similarity 90 member A1	protein-coding	55138	8373856	8380214	12	-	6358	0	0	4	0	4	0	0	4	4	0.125	0.6633858267716537
ENSG00000181009	OR52N5	olfactory receptor family 52 subfamily N member 5	protein-coding	390075	5798864	5799897	11	-	1033	4	2	0	0	4	2	6	0	6	0.03125000000000001	0.24209770114942533
ENSG00000187537	POTEG	POTE ankyrin domain family member G	protein-coding	404785	19983559	20020272	14	-	36713	0	0	4	3	4	3	0	7	7	0.015625000000000007	0.15262681159420297
ENSG00000198502	HLA-DRB5	major histocompatibility complex, class II, DR beta 5	protein-coding	3127	32485120	32498064	6	-	12944	0	4	0	0	0	4	4	0	4	0.125	0.6633858267716537
ENSG00000200790	RNU6-631P	RNA, U6 small nuclear 631, pseudogene	pseudo	106479845	22071734	22071840	15	-	106	0	0	4	3	4	3	0	7	7	0.015625000000000007	0.15262681159420297
ENSG00000205592	MUC19	mucin 19, oligomeric	protein-coding	283463	40787197	40964562	12	+	177365	4	0	0	0	4	0	4	0	4	0.125	0.6633858267716537
ENSG00000205718	MBD3L4	methyl-CpG binding domain protein 3 like 4	protein-coding	653656	7037759	7040190	19	-	2431	0	0	1	4	1	4	0	5	5	0.0625	0.41707920792079206
ENSG00000207289	RNU6-1235P	RNA, U6 small nuclear 1235, pseudogene	pseudo	106480701	21950659	21950765	15	+	106	0	0	4	3	4	3	0	7	7	0.015625000000000007	0.15262681159420297
ENSG00000211939	NA	NA	NA	NA	NA	NA	NA	NA	NA	4	0	1	0	5	0	4	1	5	0.37499999999999994	1
ENSG00000212516	RNU6-1268P	RNA, U6 small nuclear 1268, pseudogene	pseudo	106480654	20008753	20008859	14	-	106	0	0	4	3	4	3	0	7	7	0.015625000000000007	0.15262681159420297
ENSG00000212612	RNU6-1239P	RNA, U6 small nuclear 1239, pseudogene	pseudo	106481571	19564785	19564891	14	+	106	0	0	4	3	4	3	0	7	7	0.015625000000000007	0.15262681159420297
ENSG00000222036	POTEM	POTE ankyrin domain family member M	protein-coding	641455	19553365	19590078	14	+	36713	0	0	4	3	4	3	0	7	7	0.015625000000000007	0.15262681159420297
ENSG00000223569	USP17L15	ubiquitin specific peptidase 17 like family member 15	protein-coding	100288520	9236111	9237700	4	+	1589	0	4	2	0	2	4	4	2	6	0.6874999999999999	1
ENSG00000227140	USP17L5	ubiquitin specific peptidase 17 like family member 5	protein-coding	728386	9341129	9342721	4	+	1592	0	4	2	0	2	4	4	2	6	0.6874999999999999	1
ENSG00000227551	USP17L12	ubiquitin specific peptidase 17 like family member 12	protein-coding	100287205	9221878	9223470	4	+	1592	0	4	2	0	2	4	4	2	6	0.6874999999999999	1
ENSG00000228856	USP17L30	ubiquitin specific peptidase 17 like family member 30	protein-coding	728419	9364855	9366447	4	+	1592	0	4	2	0	2	4	4	2	6	0.6874999999999999	1
ENSG00000229314	ORM1	orosomucoid 1	protein-coding	5004	117085336	117088755	9	+	3419	0	0	3	4	3	4	0	7	7	0.015625000000000007	0.15262681159420297
ENSG00000229579	USP17L26	ubiquitin specific peptidase 17 like family member 26	protein-coding	728379	9336384	9337976	4	+	1592	0	4	2	0	2	4	4	2	6	0.6874999999999999	1
ENSG00000230031	POTEB2	POTE ankyrin domain family member B2	protein-coding	100287399	21040701	21071643	15	-	30942	0	0	4	3	4	3	0	7	7	0.015625000000000007	0.15262681159420297
ENSG00000230430	USP17L25	ubiquitin specific peptidase 17 like family member 25	protein-coding	728373	9331637	9333229	4	+	1592	0	4	2	0	2	4	4	2	6	0.6874999999999999	1
ENSG00000230522	MBD3L2	methyl-CpG binding domain protein 3 like 2	protein-coding	125997	7049332	7051746	19	+	2414	0	0	1	4	1	4	0	5	5	0.0625	0.41707920792079206
ENSG00000231051	USP17L28	ubiquitin specific peptidase 17 like family member 28	protein-coding	728400	9350619	9352211	4	+	1592	0	4	2	0	2	4	4	2	6	0.6874999999999999	1
ENSG00000231637	USP17L29	ubiquitin specific peptidase 17 like family member 29	protein-coding	728405	9355364	9356956	4	+	1592	0	4	2	0	2	4	4	2	6	0.6874999999999999	1
ENSG00000232264	USP17L24	ubiquitin specific peptidase 17 like family member 24	protein-coding	728369	9326891	9328483	4	+	1592	0	4	2	0	2	4	4	2	6	0.6874999999999999	1
ENSG00000233136	USP17L11	ubiquitin specific peptidase 17 like family member 11	protein-coding	100287178	9217131	9218723	4	+	1592	0	4	2	0	2	4	4	2	6	0.6874999999999999	1
ENSG00000233917	POTEB	POTE ankyrin domain family member B	protein-coding	100996331	22051853	22082822	15	-	30969	0	0	4	3	4	3	0	7	7	0.015625000000000007	0.15262681159420297
ENSG00000235780	USP17L27	ubiquitin specific peptidase 17 like family member 27	protein-coding	728393	9345874	9347466	4	+	1592	0	4	2	0	2	4	4	2	6	0.6874999999999999	1
ENSG00000237247	MBD3L5	methyl-CpG binding domain protein 3 like 5	protein-coding	284428	7030589	7033022	19	+	2433	0	0	1	4	1	4	0	5	5	0.0625	0.41707920792079206
ENSG00000238478	RNU6-498P	RNA, U6 small nuclear 498, pseudogene	pseudo	106481338	20944008	20944114	15	+	106	0	0	4	3	4	3	0	7	7	0.015625000000000007	0.15262681159420297
ENSG00000238489	RNU6-749P	RNA, U6 small nuclear 749, pseudogene	pseudo	106480606	21060580	21060686	15	-	106	0	0	4	3	4	3	0	7	7	0.015625000000000007	0.15262681159420297
ENSG00000238823	NA	NA	NA	NA	NA	NA	NA	NA	NA	1	0	4	0	5	0	1	4	5	0.37499999999999994	1
ENSG00000239083	NA	NA	NA	NA	NA	NA	NA	NA	NA	0	0	4	1	4	1	0	5	5	0.0625	0.41707920792079206
ENSG00000243772	KIR2DL3	killer cell immunoglobulin like receptor, two Ig domains and long cytoplasmic tail 3	protein-coding	3804	55249980	55295776	19	+	45796	4	0	1	1	5	1	4	2	6	0.6874999999999999	1
ENSG00000248920	USP17L19	ubiquitin specific peptidase 17 like family member 19	protein-coding	100287404	9255104	9256696	4	+	1592	0	4	2	0	2	4	4	2	6	0.6874999999999999	1
ENSG00000248933	USP17L22	ubiquitin specific peptidase 17 like family member 22	protein-coding	100287513	9269345	9270937	4	+	1592	0	4	2	0	2	4	4	2	6	0.6874999999999999	1
ENSG00000249104	USP17L17	ubiquitin specific peptidase 17 like family member 17	protein-coding	100287327	9245605	9247197	4	+	1592	0	4	2	0	2	4	4	2	6	0.6874999999999999	1
ENSG00000249811	USP17L21	ubiquitin specific peptidase 17 like family member 21	protein-coding	100287478	9264598	9266190	4	+	1592	0	4	2	0	2	4	4	2	6	0.6874999999999999	1
ENSG00000250745	USP17L20	ubiquitin specific peptidase 17 like family member 20	protein-coding	100287441	9259850	9261442	4	+	1592	0	4	2	0	2	4	4	2	6	0.6874999999999999	1
ENSG00000250844	USP17L18	ubiquitin specific peptidase 17 like family member 18	protein-coding	100287364	9250356	9251948	4	+	1592	0	4	2	0	2	4	4	2	6	0.6874999999999999	1
ENSG00000250913	NA	NA	NA	NA	NA	NA	NA	NA	NA	0	4	2	0	2	4	4	2	6	0.6874999999999999	1
ENSG00000255052	LOC112268389	uncharacterized LOC112268389	ncRNA	112268389	11973291	12008698	8	+	35407	2	1	4	3	6	4	3	7	10	0.3437500000000001	1
ENSG00000257749	NA	NA	NA	NA	NA	NA	NA	NA	NA	0	0	4	3	4	3	0	7	7	0.015625000000000007	0.15262681159420297
ENSG00000257853	NA	NA	NA	NA	NA	NA	NA	NA	NA	0	0	4	2	4	2	0	6	6	0.03125000000000001	0.24209770114942533
ENSG00000257990	NA	NA	NA	NA	NA	NA	NA	NA	NA	0	0	4	2	4	2	0	6	6	0.03125000000000001	0.24209770114942533
ENSG00000258590	NA	NA	NA	NA	NA	NA	NA	NA	NA	0	0	4	2	4	2	0	6	6	0.03125000000000001	0.24209770114942533
ENSG00000258855	OR11J2P	olfactory receptor family 11 subfamily J member 2 pseudogene	pseudo	81110	21166004	21166910	15	+	906	0	0	4	3	4	3	0	7	7	0.015625000000000007	0.15262681159420297
ENSG00000259156	CHEK2P2	checkpoint kinase 2 pseudogene 2	pseudo	646096	20488749	20496811	15	+	8062	0	0	4	1	4	1	0	5	5	0.0625	0.41707920792079206
ENSG00000264902	MIR5701-3	microRNA 5701-3	ncRNA	103504741	22156766	22156847	15	+	81	0	0	4	3	4	3	0	7	7	0.015625000000000007	0.15262681159420297
ENSG00000265002	NA	NA	NA	NA	NA	NA	NA	NA	NA	0	0	4	1	4	1	0	5	5	0.0625	0.41707920792079206
ENSG00000265322	MIR3118-2	microRNA 3118-2	ncRNA	100422949	21038124	21038198	15	+	74	0	0	4	3	4	3	0	7	7	0.015625000000000007	0.15262681159420297
ENSG00000265793	MIR3118-4	microRNA 3118-4	ncRNA	100422935	22049274	22049348	15	+	74	0	0	4	3	4	3	0	7	7	0.015625000000000007	0.15262681159420297
ENSG00000266026	NA	NA	NA	NA	NA	NA	NA	NA	NA	0	0	4	2	4	2	0	6	6	0.03125000000000001	0.24209770114942533
ENSG00000266545	MIR5701-1	microRNA 5701-1	ncRNA	100847060	21145581	21145662	15	+	81	0	0	4	3	4	3	0	7	7	0.015625000000000007	0.15262681159420297
ENSG00000268343	NA	NA	NA	NA	NA	NA	NA	NA	NA	0	0	4	3	4	3	0	7	7	0.015625000000000007	0.15262681159420297
ENSG00000268531	NA	NA	NA	NA	NA	NA	NA	NA	NA	0	0	4	3	4	3	0	7	7	0.015625000000000007	0.15262681159420297
ENSG00000270685	NA	NA	NA	NA	NA	NA	NA	NA	NA	0	0	4	2	4	2	0	6	6	0.03125000000000001	0.24209770114942533
ENSG00000080910	CFHR2	complement factor H related 2	protein-coding	3080	196788898	196928356	1	+	139458	2	3	0	0	2	3	5	0	5	0.0625	0.41707920792079206
ENSG00000105808	RASA4	RAS p21 protein activator 4	protein-coding	10156	102220093	102257204	7	-	37111	1	1	1	3	2	4	2	4	6	0.6874999999999999	1
ENSG00000117226	GBP3	guanylate binding protein 3	protein-coding	2635	89472349	89488565	1	-	16216	1	3	0	0	1	3	4	0	4	0.125	0.6633858267716537
ENSG00000133433	GSTT2B	glutathione S-transferase theta 2B	protein-coding	653689	24299601	24303373	22	-	3772	0	0	0	3	0	3	0	3	3	0.25000000000000006	0.8821989528795814
ENSG00000145736	GTF2H2	general transcription factor IIH subunit 2	protein-coding	2966	70330784	70363479	5	-	32695	0	0	0	3	0	3	0	3	3	0.25000000000000006	0.8821989528795814
ENSG00000146839	ZAN	zonadhesin	protein-coding	7455	100331644	100395418	7	+	63774	3	3	0	0	3	3	6	0	6	0.03125000000000001	0.24209770114942533
ENSG00000154874	CCDC144B	coiled-coil domain containing 144B (pseudogene)	pseudo	284047	18441117	18528921	17	-	87804	3	1	0	1	3	2	4	1	5	0.37499999999999994	1
ENSG00000168255	POLR2J3	RNA polymerase II subunit J3	protein-coding	548644	102178366	102213103	7	-	34737	1	1	1	3	2	4	2	4	6	0.6874999999999999	1
ENSG00000170667	RASA4B	RAS p21 protein activator 4B	protein-coding	100271927	102123590	102158228	7	-	34638	0	1	1	3	1	4	1	4	5	0.37499999999999994	1
ENSG00000171916	LGALS9C	galectin 9C	protein-coding	654346	18380051	18398259	17	+	18208	3	1	2	1	5	2	4	3	7	1	1
ENSG00000173678	SPDYE2B	speedy/RINGO cell cycle regulator family member E2B	protein-coding	100310812	102290772	102301847	7	+	11075	1	1	1	3	2	4	2	4	6	0.6874999999999999	1
ENSG00000174093	NA	NA	NA	NA	NA	NA	NA	NA	NA	0	0	0	3	0	3	0	3	3	0.25000000000000006	0.8821989528795814
ENSG00000182315	MBD3L3	methyl-CpG binding domain protein 3 like 3	protein-coding	653657	7056220	7058651	19	-	2431	0	0	0	3	0	3	0	3	3	0.25000000000000006	0.8821989528795814
ENSG00000188384	NA	NA	NA	NA	NA	NA	NA	NA	NA	0	0	3	0	3	0	0	3	3	0.25000000000000006	0.8821989528795814
ENSG00000189152	GRAPL	GRB2 related adaptor protein like	protein-coding	400581	19030782	19062489	17	+	31707	0	0	3	0	3	0	0	3	3	0.25000000000000006	0.8821989528795814
ENSG00000197262	NA	NA	NA	NA	NA	NA	NA	NA	NA	0	0	3	2	3	2	0	5	5	0.0625	0.41707920792079206
ENSG00000197665	NA	NA	NA	NA	NA	NA	NA	NA	NA	0	0	3	0	3	0	0	3	3	0.25000000000000006	0.8821989528795814
ENSG00000197681	NA	NA	NA	NA	NA	NA	NA	NA	NA	0	0	2	3	2	3	0	5	5	0.0625	0.41707920792079206
ENSG00000205020	NA	NA	NA	NA	NA	NA	NA	NA	NA	0	1	3	3	3	4	1	6	7	0.12500000000000003	0.6633858267716537
ENSG00000205021	NA	NA	NA	NA	NA	NA	NA	NA	NA	0	0	3	2	3	2	0	5	5	0.0625	0.41707920792079206
ENSG00000205238	SPDYE2	speedy/RINGO cell cycle regulator family member E2	protein-coding	441273	102191679	102202755	7	+	11076	1	1	1	3	2	4	2	4	6	0.6874999999999999	1
ENSG00000213077	NA	NA	NA	NA	NA	NA	NA	NA	NA	3	1	2	1	5	2	4	3	7	1	1
ENSG00000214844	NA	NA	NA	NA	NA	NA	NA	NA	NA	0	0	3	0	3	0	0	3	3	0.25000000000000006	0.8821989528795814
ENSG00000215354	FAM90A24P	family with sequence similarity 90, member A24	pseudo	441332	7876951	7888168	8	-	11217	0	0	3	0	3	0	0	3	3	0.25000000000000006	0.8821989528795814
ENSG00000221095	NA	NA	NA	NA	NA	NA	NA	NA	NA	0	0	3	0	3	0	0	3	3	0.25000000000000006	0.8821989528795814
ENSG00000224226	NA	NA	NA	NA	NA	NA	NA	NA	NA	0	0	3	2	3	2	0	5	5	0.0625	0.41707920792079206
ENSG00000228157	NA	NA	NA	NA	NA	NA	NA	NA	NA	1	0	3	0	4	0	1	3	4	0.6250000000000001	1
ENSG00000228278	ORM2	orosomucoid 2	protein-coding	5005	117092149	117095532	9	+	3383	0	0	1	3	1	3	0	4	4	0.125	0.6633858267716537
ENSG00000231396	USP17L10	ubiquitin specific peptidase 17 like family member 10	protein-coding	100287144	9212383	9213975	4	+	1592	0	3	1	0	1	3	3	1	4	0.6250000000000001	1
ENSG00000232216	IGHV3-43	immunoglobulin heavy variable 3-43	other	28426	106926188	106926724	14	-	536	0	0	3	0	3	0	0	3	3	0.25000000000000006	0.8821989528795814
ENSG00000232399	USP17L13	ubiquitin specific peptidase 17 like family member 13	protein-coding	100287238	9212383	9228214	4	+	15831	0	3	1	0	1	3	3	1	4	0.6250000000000001	1
ENSG00000233327	USP32P2	ubiquitin specific peptidase 32 pseudogene 2	pseudo	220594	18416599	18422988	17	-	6389	3	1	2	1	5	2	4	3	7	1	1
ENSG00000238392	NA	NA	NA	NA	NA	NA	NA	NA	NA	1	1	1	3	2	4	2	4	6	0.6874999999999999	1
ENSG00000238451	NA	NA	NA	NA	NA	NA	NA	NA	NA	0	0	0	3	0	3	0	3	3	0.25000000000000006	0.8821989528795814
ENSG00000238997	NA	NA	NA	NA	NA	NA	NA	NA	NA	1	1	1	3	2	4	2	4	6	0.6874999999999999	1
ENSG00000242019	KIR3DL3	killer cell immunoglobulin like receptor, three Ig domains and long cytoplasmic tail 3	protein-coding	115653	55235984	55248003	19	+	12019	3	0	0	0	3	0	3	0	3	0.25000000000000006	0.8821989528795814
ENSG00000244414	CFHR1	complement factor H related 1	protein-coding	3078	196788887	196801319	1	+	12432	2	3	1	0	3	3	5	1	6	0.21875000000000008	0.8821989528795814
ENSG00000247228	LOC400541	uncharacterized LOC400541	ncRNA	400541	70190243	70207351	16	-	17108	0	0	3	0	3	0	0	3	3	0.25000000000000006	0.8821989528795814
ENSG00000253294	NA	NA	NA	NA	NA	NA	NA	NA	NA	0	0	3	0	3	0	0	3	3	0.25000000000000006	0.8821989528795814
ENSG00000253467	NA	NA	NA	NA	NA	NA	NA	NA	NA	0	0	3	0	3	0	0	3	3	0.25000000000000006	0.8821989528795814
ENSG00000253588	NA	NA	NA	NA	NA	NA	NA	NA	NA	0	0	3	0	3	0	0	3	3	0.25000000000000006	0.8821989528795814
ENSG00000253597	NA	NA	NA	NA	NA	NA	NA	NA	NA	0	0	3	0	3	0	0	3	3	0.25000000000000006	0.8821989528795814
ENSG00000253705	NA	NA	NA	NA	NA	NA	NA	NA	NA	0	0	3	0	3	0	0	3	3	0.25000000000000006	0.8821989528795814
ENSG00000254228	IGHV3-42	immunoglobulin heavy variable 3-42 (pseudogene)	pseudo	28427	106919183	106919483	14	-	300	0	0	3	0	3	0	0	3	3	0.25000000000000006	0.8821989528795814
ENSG00000255769	NA	NA	NA	NA	NA	NA	NA	NA	NA	0	0	3	0	3	0	0	3	3	0.25000000000000006	0.8821989528795814
ENSG00000256515	NA	NA	NA	NA	NA	NA	NA	NA	NA	0	1	3	3	3	4	1	6	7	0.12500000000000003	0.6633858267716537
ENSG00000257335	MGAM	maltase-glucoamylase	protein-coding	8972	141607613	141806547	7	+	198934	3	0	0	0	3	0	3	0	3	0.25000000000000006	0.8821989528795814
ENSG00000262074	NA	NA	NA	NA	NA	NA	NA	NA	NA	0	0	3	0	3	0	0	3	3	0.25000000000000006	0.8821989528795814
ENSG00000262202	NA	NA	NA	NA	NA	NA	NA	NA	NA	0	0	3	0	3	0	0	3	3	0.25000000000000006	0.8821989528795814
ENSG00000262319	NA	NA	NA	NA	NA	NA	NA	NA	NA	0	0	3	0	3	0	0	3	3	0.25000000000000006	0.8821989528795814
ENSG00000263206	NA	NA	NA	NA	NA	NA	NA	NA	NA	0	0	3	0	3	0	0	3	3	0.25000000000000006	0.8821989528795814
ENSG00000263934	NA	NA	NA	NA	NA	NA	NA	NA	NA	0	0	3	0	3	0	0	3	3	0.25000000000000006	0.8821989528795814
ENSG00000264940	NA	NA	NA	NA	NA	NA	NA	NA	NA	0	0	3	0	3	0	0	3	3	0.25000000000000006	0.8821989528795814
ENSG00000265185	NA	NA	NA	NA	NA	NA	NA	NA	NA	0	0	3	0	3	0	0	3	3	0.25000000000000006	0.8821989528795814
ENSG00000266637	NA	NA	NA	NA	NA	NA	NA	NA	NA	1	1	2	3	3	4	2	5	7	0.4531250000000002	1
ENSG00000266664	NA	NA	NA	NA	NA	NA	NA	NA	NA	0	0	3	0	3	0	0	3	3	0.25000000000000006	0.8821989528795814
ENSG00000267118	NA	NA	NA	NA	NA	NA	NA	NA	NA	0	0	3	2	3	2	0	5	5	0.0625	0.41707920792079206
ENSG00000267368	UPK3BL1	uroplakin 3B like 1	protein-coding	100134938	102277472	102283238	7	-	5766	1	1	1	3	2	4	2	4	6	0.6874999999999999	1
ENSG00000267488	NA	NA	NA	NA	NA	NA	NA	NA	NA	0	1	3	2	3	3	1	5	6	0.21875000000000008	0.8821989528795814
ENSG00000270249	NA	NA	NA	NA	NA	NA	NA	NA	NA	1	1	1	3	2	4	2	4	6	0.6874999999999999	1
ENSG00000081842	PCDHA6	protocadherin alpha 6	protein-coding	56142	140207563	140391929	5	+	184366	1	2	0	0	1	2	3	0	3	0.25000000000000006	0.8821989528795814
ENSG00000090857	PDPR	pyruvate dehydrogenase phosphatase regulatory subunit	protein-coding	55066	70147529	70195203	16	+	47674	0	0	2	0	2	0	0	2	2	0.5	1
ENSG00000105501	SIGLEC5	sialic acid binding Ig like lectin 5	protein-coding	8778	52114781	52150151	19	-	35370	2	2	0	0	2	2	4	0	4	0.125	0.6633858267716537
ENSG00000120586	NA	NA	NA	NA	NA	NA	NA	NA	NA	2	0	0	0	2	0	2	0	2	0.5	1
ENSG00000132256	TRIM5	tripartite motif containing 5	protein-coding	85363	5684425	5959849	11	-	275424	2	2	0	0	2	2	4	0	4	0.125	0.6633858267716537
ENSG00000135226	UGT2B28	UDP glucuronosyltransferase family 2 member B28	protein-coding	54490	70146217	70160768	4	+	14551	2	2	0	0	2	2	4	0	4	0.125	0.6633858267716537
ENSG00000145113	MUC4	mucin 4, cell surface associated	protein-coding	4585	195473636	195539148	3	-	65512	2	0	0	0	2	0	2	0	2	0.5	1
ENSG00000163202	LCE3D	late cornified envelope 3D	protein-coding	84648	152551857	152552980	1	-	1123	0	2	0	0	0	2	2	0	2	0.5	1
ENSG00000164845	NA	NA	NA	NA	NA	NA	NA	NA	NA	0	0	2	2	2	2	0	4	4	0.125	0.6633858267716537
ENSG00000170255	MRGPRX1	MAS related GPR family member X1	protein-coding	259249	18955360	18956556	11	-	1196	2	0	0	0	2	0	2	0	2	0.5	1
ENSG00000170356	OR2A20P	olfactory receptor family 2 subfamily A member 20 pseudogene	pseudo	401428	143947764	143948696	7	-	932	0	0	2	2	2	2	0	4	4	0.125	0.6633858267716537
ENSG00000170848	PSG6	pregnancy specific beta-1-glycoprotein 6	protein-coding	5675	43406231	43423715	19	-	17484	1	2	0	0	1	2	3	0	3	0.25000000000000006	0.8821989528795814
ENSG00000183303	OR5P2	olfactory receptor family 5 subfamily P member 2	protein-coding	120065	7817452	7818520	11	-	1068	2	0	0	0	2	0	2	0	2	0.5	1
ENSG00000183632	TP53TG3	TP53 target 3	protein-coding	24150	32684852	32688053	16	-	3201	0	1	2	0	2	1	1	2	3	1	1
ENSG00000183668	PSG9	pregnancy specific beta-1-glycoprotein 9	protein-coding	5678	43715943	43773682	19	-	57739	2	0	0	0	2	0	2	0	2	0.5	1
ENSG00000183791	NA	NA	NA	NA	NA	NA	NA	NA	NA	1	0	0	2	1	2	1	2	3	1	1
ENSG00000186523	FAM86B1	family with sequence similarity 86 member B1	protein-coding	85002	12039960	12051642	8	-	11682	1	0	2	0	3	0	1	2	3	1	1
ENSG00000186831	NA	NA	NA	NA	NA	NA	NA	NA	NA	0	2	1	1	1	3	2	2	4	1	1
ENSG00000188403	IGHV1OR15-9	immunoglobulin heavy variable 1/OR15-9 (non-functional)	pseudo	390531	20169919	20170354	15	-	435	0	0	2	1	2	1	0	3	3	0.25000000000000006	0.8821989528795814
ENSG00000188818	ZDHHC11	zinc finger DHHC-type containing 11	protein-coding	79844	710471	851101	5	-	140630	1	2	0	0	1	2	3	0	3	0.25000000000000006	0.8821989528795814
ENSG00000189357	SPATA31D4	SPATA31 subfamily D member 4	protein-coding	389761	84543429	84549863	9	+	6434	1	2	0	0	1	2	3	0	3	0.25000000000000006	0.8821989528795814
ENSG00000198062	POTEH	POTE ankyrin domain family member H	protein-coding	23784	16256441	16287937	22	-	31496	0	0	2	1	2	1	0	3	3	0.25000000000000006	0.8821989528795814
ENSG00000201241	RNU6-978P	RNA, U6 small nuclear 978, pseudogene	pseudo	106479998	20088867	20088969	15	+	102	0	0	2	1	2	1	0	3	3	0.25000000000000006	0.8821989528795814
ENSG00000201792	NA	NA	NA	NA	NA	NA	NA	NA	NA	0	0	2	1	2	1	0	3	3	0.25000000000000006	0.8821989528795814
ENSG00000204752	NA	NA	NA	NA	NA	NA	NA	NA	NA	0	0	0	2	0	2	0	2	2	0.5	1
ENSG00000204961	PCDHA9	protocadherin alpha 9	protein-coding	9752	140227048	140391929	5	+	164881	1	2	0	0	1	2	3	0	3	0.25000000000000006	0.8821989528795814
ENSG00000204962	PCDHA8	protocadherin alpha 8	protein-coding	56140	140220907	140391929	5	+	171022	1	2	0	0	1	2	3	0	3	0.25000000000000006	0.8821989528795814
ENSG00000204963	PCDHA7	protocadherin alpha 7	protein-coding	56141	140213969	140391929	5	+	177960	1	2	0	0	1	2	3	0	3	0.25000000000000006	0.8821989528795814
ENSG00000204965	PCDHA5	protocadherin alpha 5	protein-coding	56143	140201222	140391929	5	+	190707	1	2	0	0	1	2	3	0	3	0.25000000000000006	0.8821989528795814
ENSG00000204967	PCDHA4	protocadherin alpha 4	protein-coding	56144	140186659	140391929	5	+	205270	1	2	0	0	1	2	3	0	3	0.25000000000000006	0.8821989528795814
ENSG00000204969	PCDHA2	protocadherin alpha 2	protein-coding	56146	140174444	140391929	5	+	217485	1	2	0	0	1	2	3	0	3	0.25000000000000006	0.8821989528795814
ENSG00000204970	PCDHA1	protocadherin alpha 1	protein-coding	56147	140165876	140391929	5	+	226053	1	2	0	0	1	2	3	0	3	0.25000000000000006	0.8821989528795814
ENSG00000205456	TP53TG3D	TP53 target 3D	protein-coding	729264	32264040	32267240	16	+	3200	0	1	2	0	2	1	1	2	3	1	1
ENSG00000205457	TP53TG3C	TP53 target 3C	protein-coding	653550	33204156	33264727	16	+	60571	0	0	2	0	2	0	0	2	2	0.5	1
ENSG00000205497	OR51A4	olfactory receptor family 51 subfamily A member 4	protein-coding	401666	4967355	4968356	11	-	1001	0	2	0	0	0	2	2	0	2	0.5	1
ENSG00000206077	ZDHHC11B	zinc finger DHHC-type containing 11B	protein-coding	653082	711923	767067	5	-	55144	1	0	2	1	3	1	1	3	4	0.6250000000000001	1
ENSG00000211959	IGHV4-39	immunoglobulin heavy variable 4-39	other	28394	106877619	106878126	14	-	507	0	0	2	0	2	0	0	2	2	0.5	1
ENSG00000212216	RNU6-816P	RNA, U6 small nuclear 816, pseudogene	pseudo	106480401	16276398	16276504	22	-	106	0	0	2	1	2	1	0	3	3	0.25000000000000006	0.8821989528795814
ENSG00000212807	OR2A42	olfactory receptor family 2 subfamily A member 42	protein-coding	402317	143929004	143929936	7	-	932	0	0	2	2	2	2	0	4	4	0.125	0.6633858267716537
ENSG00000213214	ARHGEF35	Rho guanine nucleotide exchange factor 35	protein-coding	445328	143883176	143991230	7	-	108054	0	0	1	2	1	2	0	3	3	0.25000000000000006	0.8821989528795814
ENSG00000214617	SLC6A10P	solute carrier family 6 member 10, pseudogene	pseudo	386757	32890027	32896822	16	-	6795	0	1	2	0	2	1	1	2	3	1	1
ENSG00000214856	NA	NA	NA	NA	NA	NA	NA	NA	NA	2	2	2	1	4	3	4	3	7	1	1
ENSG00000215343	ZNF705D	zinc finger protein 705D	protein-coding	728957	11961898	11973025	8	+	11127	0	1	2	0	2	1	1	2	3	1	1
ENSG00000221247	NA	NA	NA	NA	NA	NA	NA	NA	NA	0	0	2	0	2	0	0	2	2	0.5	1
ENSG00000221307	NA	NA	NA	NA	NA	NA	NA	NA	NA	0	0	1	2	1	2	0	3	3	0.25000000000000006	0.8821989528795814
ENSG00000221354	NA	NA	NA	NA	NA	NA	NA	NA	NA	0	0	1	2	1	2	0	3	3	0.25000000000000006	0.8821989528795814
ENSG00000221970	OR2A1	olfactory receptor family 2 subfamily A member 1	protein-coding	346528	144015218	144016150	7	+	932	0	0	2	2	2	2	0	4	4	0.125	0.6633858267716537
ENSG00000223931	NA	NA	NA	NA	NA	NA	NA	NA	NA	0	0	2	0	2	0	0	2	2	0.5	1
ENSG00000228049	POLR2J2	RNA polymerase II subunit J2	protein-coding	246721	102277474	102312076	7	-	34602	1	1	1	2	2	3	2	3	5	1	1
ENSG00000228960	NA	NA	NA	NA	NA	NA	NA	NA	NA	0	0	2	2	2	2	0	4	4	0.125	0.6633858267716537
ENSG00000229292	RFPL4AL1	ret finger protein like 4A like 1	protein-coding	729974	56280507	56284545	19	+	4038	0	0	0	2	0	2	0	2	2	0.5	1
ENSG00000230267	NA	NA	NA	NA	NA	NA	NA	NA	NA	0	1	2	0	2	1	1	2	3	1	1
ENSG00000230493	NA	NA	NA	NA	NA	NA	NA	NA	NA	0	0	2	0	2	0	0	2	2	0.5	1
ENSG00000231924	PSG1	pregnancy specific beta-1-glycoprotein 1	protein-coding	5669	43370616	43383871	19	-	13255	1	2	0	0	1	2	3	0	3	0.25000000000000006	0.8821989528795814
ENSG00000232775	BMS1P22	BMS1 pseudogene 22	pseudo	106480334	16171460	16172116	22	+	656	0	0	2	1	2	1	0	3	3	0.25000000000000006	0.8821989528795814
ENSG00000232948	DEFB130A	defensin beta 130A	protein-coding	245940	12168471	12175825	8	-	7354	0	0	2	0	2	0	0	2	2	0.5	1
ENSG00000233050	DEFB130B	defensin beta 130B	protein-coding	100133267	11921898	11929256	8	-	7358	0	0	2	0	2	0	0	2	2	0.5	1
ENSG00000233732	NA	NA	NA	NA	NA	NA	NA	NA	NA	0	1	2	0	2	1	1	2	3	1	1
ENSG00000233999	NA	NA	NA	NA	NA	NA	NA	NA	NA	0	0	2	0	2	0	0	2	2	0.5	1
ENSG00000234298	NA	NA	NA	NA	NA	NA	NA	NA	NA	1	0	0	2	1	2	1	2	3	1	1
ENSG00000234972	NA	NA	NA	NA	NA	NA	NA	NA	NA	0	0	2	1	2	1	0	3	3	0.25000000000000006	0.8821989528795814
ENSG00000235370	NA	NA	NA	NA	NA	NA	NA	NA	NA	0	0	2	0	2	0	0	2	2	0.5	1
ENSG00000236666	NA	NA	NA	NA	NA	NA	NA	NA	NA	0	0	2	1	2	1	0	3	3	0.25000000000000006	0.8821989528795814
ENSG00000238740	NA	NA	NA	NA	NA	NA	NA	NA	NA	0	0	0	2	0	2	0	2	2	0.5	1
ENSG00000240279	NA	NA	NA	NA	NA	NA	NA	NA	NA	0	2	0	1	0	3	2	1	3	1	1
ENSG00000243130	PSG11	pregnancy specific beta-1-glycoprotein 11	protein-coding	5680	43511808	43530664	19	-	18856	1	2	0	0	1	2	3	0	3	0.25000000000000006	0.8821989528795814
ENSG00000243137	PSG4	pregnancy specific beta-1-glycoprotein 4	protein-coding	5672	43696854	43709926	19	-	13072	2	1	1	0	3	1	3	1	4	0.6250000000000001	1
ENSG00000243896	OR2A7	olfactory receptor family 2 subfamily A member 7	protein-coding	401427	143955700	143956815	7	-	1115	0	0	2	2	2	2	0	4	4	0.125	0.6633858267716537
ENSG00000244198	NA	NA	NA	NA	NA	NA	NA	NA	NA	0	0	2	2	2	2	0	4	4	0.125	0.6633858267716537
ENSG00000244479	NA	NA	NA	NA	NA	NA	NA	NA	NA	0	0	2	2	2	2	0	4	4	0.125	0.6633858267716537
ENSG00000244693	CTAGE8	CTAGE family member 8	protein-coding	100142659	143963794	143966381	7	-	2587	0	0	2	2	2	2	0	4	4	0.125	0.6633858267716537
ENSG00000248257	NA	NA	NA	NA	NA	NA	NA	NA	NA	1	2	1	1	2	3	3	2	5	1	1
ENSG00000250120	PCDHA10	protocadherin alpha 10	protein-coding	56139	140235595	140391929	5	+	156334	1	2	0	0	1	2	3	0	3	0.25000000000000006	0.8821989528795814
ENSG00000252029	RNA5SP253	RNA, 5S ribosomal pseudogene 253	pseudo	106480760	11944905	11944954	8	-	49	0	1	2	0	2	1	1	2	3	1	1
ENSG00000252535	RNA5SP254	RNA, 5S ribosomal pseudogene 254	pseudo	106481793	12191153	12191202	8	-	49	0	0	2	0	2	0	0	2	2	0.5	1
ENSG00000253989	IGHVIII-38-1	immunoglobulin heavy variable (III)-38-1 (pseudogene)	pseudo	28346	106873942	106873995	14	-	53	0	0	2	0	2	0	0	2	2	0.5	1
ENSG00000254415	SIGLEC14	sialic acid binding Ig like lectin 14	protein-coding	100049587	52145806	52150054	19	-	4248	2	2	0	0	2	2	4	0	4	0.125	0.6633858267716537
ENSG00000255408	PCDHA3	protocadherin alpha 3	protein-coding	56145	140180783	140391929	5	+	211146	1	2	0	0	1	2	3	0	3	0.25000000000000006	0.8821989528795814
ENSG00000255495	NA	NA	NA	NA	NA	NA	NA	NA	NA	1	0	2	0	3	0	1	2	3	1	1
ENSG00000259303	IGHV2OR16-5	immunoglobulin heavy variable 2/OR16-5 (non-functional)	pseudo	100129631	32859034	32859477	16	+	443	0	1	2	0	2	1	1	2	3	1	1
ENSG00000259337	NA	NA	NA	NA	NA	NA	NA	NA	NA	0	0	2	1	2	1	0	3	3	0.25000000000000006	0.8821989528795814
ENSG00000259490	NA	NA	NA	NA	NA	NA	NA	NA	NA	0	0	2	1	2	1	0	3	3	0.25000000000000006	0.8821989528795814
ENSG00000259538	UBE2Q2P11	ubiquitin conjugating enzyme E2 Q2 pseudogene 11	pseudo	100421767	84967471	84976535	15	-	9064	0	0	2	0	2	0	0	2	2	0.5	1
ENSG00000259680	IGHV3OR16-17	immunoglobulin heavy variable 3/OR16-17 (non-functional)	other	390714	33647044	33647696	16	-	652	0	0	2	0	2	0	0	2	2	0.5	1
ENSG00000259852	NA	NA	NA	NA	NA	NA	NA	NA	NA	0	1	2	0	2	1	1	2	3	1	1
ENSG00000259966	NA	NA	NA	NA	NA	NA	NA	NA	NA	0	1	2	0	2	1	1	2	3	1	1
ENSG00000259997	NA	NA	NA	NA	NA	NA	NA	NA	NA	0	1	2	0	2	1	1	2	3	1	1
ENSG00000260048	NA	NA	NA	NA	NA	NA	NA	NA	NA	0	0	2	0	2	0	0	2	2	0.5	1
ENSG00000260419	NA	NA	NA	NA	NA	NA	NA	NA	NA	0	1	2	0	2	1	1	2	3	1	1
ENSG00000260518	NA	NA	NA	NA	NA	NA	NA	NA	NA	0	0	2	0	2	0	0	2	2	0.5	1
ENSG00000260575	NA	NA	NA	NA	NA	NA	NA	NA	NA	0	1	2	0	2	1	1	2	3	1	1
ENSG00000260644	HERC2P5	hect domain and RLD 2 pseudogene 5	pseudo	388254	32753674	32786689	16	+	33015	0	1	2	0	2	1	1	2	3	1	1
ENSG00000260781	ARHGAP23P1	Rho GTPase activating protein 23 pseudogene 1	pseudo	102577425	33709886	33739491	16	-	29605	0	0	2	0	2	0	0	2	2	0.5	1
ENSG00000260974	NA	NA	NA	NA	NA	NA	NA	NA	NA	0	1	2	0	2	1	1	2	3	1	1
ENSG00000261405	NA	NA	NA	NA	NA	NA	NA	NA	NA	0	0	2	0	2	0	0	2	2	0.5	1
ENSG00000261509	TP53TG3B	TP53 target 3B	protein-coding	729355	33261515	33264716	16	+	3201	0	0	2	0	2	0	0	2	2	0.5	1
ENSG00000261599	NA	NA	NA	NA	NA	NA	NA	NA	NA	0	1	2	0	2	1	1	2	3	1	1
ENSG00000261704	NA	NA	NA	NA	NA	NA	NA	NA	NA	0	0	2	0	2	0	0	2	2	0.5	1
ENSG00000261834	NA	NA	NA	NA	NA	NA	NA	NA	NA	0	1	2	0	2	1	1	2	3	1	1
ENSG00000264793	MIR4771-1	microRNA 4771-1	ncRNA	100616370	87421909	87421982	2	+	73	0	0	2	0	2	0	0	2	2	0.5	1
ENSG00000265507	MIR4435-1	microRNA 4435-1	ncRNA	100616499	87929274	87929353	2	+	79	0	0	2	0	2	0	0	2	2	0.5	1
ENSG00000266396	MIR4273	microRNA 4273	ncRNA	100422955	75787431	75787514	3	+	83	0	0	2	1	2	1	0	3	3	0.25000000000000006	0.8821989528795814
ENSG00000266996	NA	NA	NA	NA	NA	NA	NA	NA	NA	1	0	0	2	1	2	1	2	3	1	1
ENSG00000268500	NA	NA	NA	NA	NA	NA	NA	NA	NA	2	2	0	0	2	2	4	0	4	0.125	0.6633858267716537
ENSG00000268758	ADGRE4P	adhesion G protein-coupled receptor E4, pseudogene	pseudo	326342	6954683	6988871	19	-	34188	0	0	0	2	0	2	0	2	2	0.5	1
ENSG00000268845	NA	NA	NA	NA	NA	NA	NA	NA	NA	0	0	0	2	0	2	0	2	2	0.5	1
ENSG00000270318	NA	NA	NA	NA	NA	NA	NA	NA	NA	0	0	2	0	2	0	0	2	2	0.5	1
ENSG00000270467	NA	NA	NA	NA	NA	NA	NA	NA	NA	0	0	2	0	2	0	0	2	2	0.5	1
ENSG00000270472	IGHV3OR16-9	immunoglobulin heavy variable 3/OR16-9 (non-functional)	pseudo	28307	32077386	32077679	16	+	293	0	0	2	0	2	0	0	2	2	0.5	1
ENSG00000270864	NA	NA	NA	NA	NA	NA	NA	NA	NA	0	1	2	0	2	1	1	2	3	1	1
ENSG00000271127	NA	NA	NA	NA	NA	NA	NA	NA	NA	0	0	2	1	2	1	0	3	3	0.25000000000000006	0.8821989528795814
ENSG00000271130	IGHV3OR16-8	immunoglobulin heavy variable 3/OR16-8 (non-functional)	other	388255	33020496	33020941	16	+	445	0	1	2	0	2	1	1	2	3	1	1
ENSG00000271178	NA	NA	NA	NA	NA	NA	NA	NA	NA	0	0	2	0	2	0	0	2	2	0.5	1
ENSG00000271620	NA	NA	NA	NA	NA	NA	NA	NA	NA	0	0	2	0	2	0	0	2	2	0.5	1
ENSG00000272872	NA	NA	NA	NA	NA	NA	NA	NA	NA	0	0	2	1	2	1	0	3	3	0.25000000000000006	0.8821989528795814
ENSG00000272887	NA	NA	NA	NA	NA	NA	NA	NA	NA	0	0	2	0	2	0	0	2	2	0.5	1
ENSG00000273343	NA	NA	NA	NA	NA	NA	NA	NA	NA	0	0	2	0	2	0	0	2	2	0.5	1
ENSG00000273445	NA	NA	NA	NA	NA	NA	NA	NA	NA	0	0	2	0	2	0	0	2	2	0.5	1
ENSG00000005075	POLR2J	RNA polymerase II subunit J	protein-coding	5439	102113565	102119354	7	-	5789	0	0	1	0	1	0	0	1	1	1	1
ENSG00000029153	ARNTL2	aryl hydrocarbon receptor nuclear translocator like 2	protein-coding	56938	27485787	27576241	12	+	90454	0	0	0	1	0	1	0	1	1	1	1
ENSG00000059804	SLC2A3	solute carrier family 2 member 3	protein-coding	6515	8071826	8088871	12	-	17045	0	0	0	1	0	1	0	1	1	1	1
ENSG00000068793	NA	NA	NA	NA	NA	NA	NA	NA	NA	0	0	1	0	1	0	0	1	1	1	1
ENSG00000095564	BTAF1	B-TFIID TATA-box binding protein associated factor 1	protein-coding	9044	93683526	93790082	10	+	106556	0	0	1	0	1	0	0	1	1	1	1
ENSG00000099974	DDTL	D-dopachrome tautomerase like	protein-coding	100037417	24309089	24314721	22	+	5632	0	0	0	1	0	1	0	1	1	1	1
ENSG00000100033	PRODH	proline dehydrogenase 1	protein-coding	5625	18900294	18924066	22	-	23772	0	1	0	0	0	1	1	0	1	1	1
ENSG00000100197	CYP2D6	cytochrome P450 family 2 subfamily D member 6	protein-coding	1565	42522501	42526908	22	-	4407	0	0	0	1	0	1	0	1	1	1	1
ENSG00000103154	NECAB2	N-terminal EF-hand calcium binding protein 2	protein-coding	54550	84002237	84036381	16	+	34144	0	1	0	0	0	1	1	0	1	1	1
ENSG00000112096	SOD2	superoxide dismutase 2	protein-coding	6648	160090089	160183561	6	-	93472	1	0	0	0	1	0	1	0	1	1	1
ENSG00000112964	GHR	growth hormone receptor	protein-coding	2690	42423879	42721979	5	+	298100	0	1	0	0	0	1	1	0	1	1	1
ENSG00000113212	PCDHB7	protocadherin beta 7	protein-coding	56129	140552243	140555957	5	+	3714	0	0	1	0	1	0	0	1	1	1	1
ENSG00000113384	GOLPH3	golgi phosphoprotein 3	protein-coding	64083	32124810	32174456	5	-	49646	0	0	1	0	1	0	0	1	1	1	1
ENSG00000116721	PRAMEF1	PRAME family member 1	protein-coding	65121	12851546	12856777	1	+	5231	0	1	0	0	0	1	1	0	1	1	1
ENSG00000120322	PCDHB8	protocadherin beta 8	protein-coding	56128	140557371	140560081	5	+	2710	0	0	1	0	1	0	0	1	1	1	1
ENSG00000120952	PRAMEF2	PRAME family member 2	protein-coding	65122	12916941	12921764	1	+	4823	0	1	0	0	0	1	1	0	1	1	1
ENSG00000124467	PSG8	pregnancy specific beta-1-glycoprotein 8	protein-coding	440533	43256838	43359843	19	-	103005	0	0	1	0	1	0	0	1	1	1	1
ENSG00000124789	NUP153	nucleoporin 153	protein-coding	9972	17615269	17706656	6	-	91387	0	0	0	1	0	1	0	1	1	1	1
ENSG00000125337	KIF25	kinesin family member 25	protein-coding	3834	168399772	168445769	6	+	45997	0	0	0	1	0	1	0	1	1	1	1
ENSG00000125498	KIR2DL1	killer cell immunoglobulin like receptor, two Ig domains and long cytoplasmic tail 1	protein-coding	3802	55281263	55295774	19	+	14511	1	0	1	1	2	1	1	2	3	1	1
ENSG00000128383	APOBEC3A	apolipoprotein B mRNA editing enzyme catalytic subunit 3A	protein-coding	200315	39348756	39359188	22	+	10432	0	1	0	0	0	1	1	0	1	1	1
ENSG00000130538	OR11H1	olfactory receptor family 11 subfamily H member 1	protein-coding	81061	16448824	16449805	22	-	981	0	0	0	1	0	1	0	1	1	1	1
ENSG00000130649	CYP2E1	cytochrome P450 family 2 subfamily E member 1	protein-coding	1571	135333910	135352626	10	+	18716	0	1	0	0	0	1	1	0	1	1	1
ENSG00000131864	USP29	ubiquitin specific peptidase 29	protein-coding	57663	57630506	57643294	19	+	12788	0	1	0	0	0	1	1	0	1	1	1
ENSG00000133640	LRRIQ1	leucine rich repeats and IQ motif containing 1	protein-coding	84125	85430129	85638883	12	+	208754	0	1	0	0	0	1	1	0	1	1	1
ENSG00000134545	KLRC1	killer cell lectin like receptor C1	protein-coding	3821	10594863	10607284	12	-	12421	1	0	0	0	1	0	1	0	1	1	1
ENSG00000137414	FAM8A1	family with sequence similarity 8 member A1	protein-coding	51439	17600586	17611950	6	+	11364	0	0	0	1	0	1	0	1	1	1	1
ENSG00000140157	NIPA2	NIPA magnesium transporter 2	protein-coding	81614	23004684	23034427	15	-	29743	0	0	1	0	1	0	0	1	1	1	1
ENSG00000140181	NA	NA	NA	NA	NA	NA	NA	NA	NA	0	0	1	0	1	0	0	1	1	1	1
ENSG00000140839	CLEC18B	C-type lectin domain family 18 member B	protein-coding	497190	74442529	74455290	16	-	12761	0	0	1	0	1	0	0	1	1	1	1
ENSG00000140961	OSGIN1	oxidative stress induced growth inhibitor 1	protein-coding	29948	83981887	83999937	16	+	18050	0	1	0	0	0	1	1	0	1	1	1
ENSG00000141946	ZIM3	zinc finger imprinted 3	protein-coding	114026	57645464	57656570	19	-	11106	0	1	0	0	0	1	1	0	1	1	1
ENSG00000145002	FAM86B2	family with sequence similarity 86 member B2	protein-coding	653333	12282913	12293915	8	-	11002	0	0	1	0	1	0	0	1	1	1	1
ENSG00000146707	POMZP3	POM121 and ZP3 fusion	protein-coding	22932	76239303	76256558	7	-	17255	0	0	1	0	1	0	0	1	1	1	1
ENSG00000148513	ANKRD30A	ankyrin repeat domain 30A	protein-coding	91074	37414785	37673039	10	+	258254	0	0	1	0	1	0	0	1	1	1	1
ENSG00000150165	NA	NA	NA	NA	NA	NA	NA	NA	NA	0	0	1	0	1	0	0	1	1	1	1
ENSG00000150244	TRIM48	tripartite motif containing 48	protein-coding	79097	55029658	55038595	11	+	8937	0	1	0	0	0	1	1	0	1	1	1
ENSG00000151876	FBXO4	F-box protein 4	protein-coding	26272	41925356	41941845	5	+	16489	0	1	0	0	0	1	1	0	1	1	1
ENSG00000151883	PARP8	poly(ADP-ribose) polymerase family member 8	protein-coding	79668	49961733	50142356	5	+	180623	1	0	0	0	1	0	1	0	1	1	1
ENSG00000153575	NA	NA	NA	NA	NA	NA	NA	NA	NA	0	0	1	0	1	0	0	1	1	1	1
ENSG00000153666	NA	NA	NA	NA	NA	NA	NA	NA	NA	0	0	1	0	1	0	0	1	1	1	1
ENSG00000157335	CLEC18C	C-type lectin domain family 18 member C	protein-coding	283971	70207225	70220798	16	+	13573	0	0	1	0	1	0	0	1	1	1	1
ENSG00000159763	PIP	prolactin induced protein	protein-coding	5304	142829170	142836839	7	+	7669	1	0	0	0	1	0	1	0	1	1	1
ENSG00000161583	NA	NA	NA	NA	NA	NA	NA	NA	NA	0	0	0	1	0	1	0	1	1	1	1
ENSG00000162747	FCGR3B	Fc fragment of IgG receptor IIIb	protein-coding	2215	161592986	161601753	1	-	8767	0	0	1	0	1	0	0	1	1	1	1
ENSG00000164816	DEFA5	defensin alpha 5	protein-coding	1670	6912831	6914256	8	-	1425	0	0	1	0	1	0	0	1	1	1	1
ENSG00000164871	SPAG11B	sperm associated antigen 11B	protein-coding	10407	7300206	7321196	8	-	20990	0	0	1	0	1	0	0	1	1	1	1
ENSG00000165390	NA	NA	NA	NA	NA	NA	NA	NA	NA	0	0	1	0	1	0	0	1	1	1	1
ENSG00000165874	SHLD2P1	shieldin complex subunit 2 pseudogene 1	pseudo	414241	46897592	46939143	10	+	41551	0	0	1	0	1	0	0	1	1	1	1
ENSG00000165935	SMCO2	single-pass membrane protein with coiled-coil domains 2	protein-coding	341346	27619743	27655118	12	+	35375	0	0	0	1	0	1	0	1	1	1	1
ENSG00000166007	NA	NA	NA	NA	NA	NA	NA	NA	NA	0	1	0	0	0	1	1	0	1	1	1
ENSG00000167346	MMP26	matrix metallopeptidase 26	protein-coding	56547	4788500	5013659	11	+	225159	1	0	0	0	1	0	1	0	1	1	1
ENSG00000168477	TNXB	tenascin XB	protein-coding	7148	32008931	32083111	6	-	74180	0	0	0	1	0	1	0	1	1	1	1
ENSG00000170113	NIPA1	NIPA magnesium transporter 1	protein-coding	123606	23043277	23100005	15	-	56728	0	0	1	0	1	0	0	1	1	1	1
ENSG00000170835	CEL	carboxyl ester lipase	protein-coding	1056	135937365	135947248	9	+	9883	0	0	0	1	0	1	0	1	1	1	1
ENSG00000170866	NA	NA	NA	NA	NA	NA	NA	NA	NA	1	0	0	0	1	0	1	0	1	1	1
ENSG00000171711	DEFB4A	defensin beta 4A	protein-coding	1673	7752151	7754233	8	+	2082	0	0	1	0	1	0	0	1	1	1	1
ENSG00000173110	HSPA6	heat shock protein family A (Hsp70) member 6	protein-coding	3310	161494036	161496681	1	+	2645	0	0	0	1	0	1	0	1	1	1	1
ENSG00000174721	FGFBP3	fibroblast growth factor binding protein 3	protein-coding	143282	93666346	93669240	10	-	2894	0	0	1	0	1	0	0	1	1	1	1
ENSG00000175676	GOLGA8DP	golgin A8 family member D, pseudogene	pseudo	100132979	23435158	23445459	15	+	10301	0	0	1	0	1	0	0	1	1	1	1
ENSG00000176654	NA	NA	NA	NA	NA	NA	NA	NA	NA	0	0	0	1	0	1	0	1	1	1	1
ENSG00000176782	DEFB104A	defensin beta 104A	protein-coding	140596	7693993	7698764	8	+	4771	0	0	1	0	1	0	0	1	1	1	1
ENSG00000176797	DEFB103B	defensin beta 103B	protein-coding	55894	7738726	7740186	8	+	1460	0	0	1	0	1	0	0	1	1	1	1
ENSG00000177023	DEFB104B	defensin beta 104B	protein-coding	503618	7327830	7332604	8	-	4774	0	0	1	0	1	0	0	1	1	1	1
ENSG00000177243	DEFB103B	defensin beta 103B	protein-coding	55894	7286410	7287870	8	-	1460	0	0	1	0	1	0	0	1	1	1	1
ENSG00000177257	DEFB4A	defensin beta 4A	protein-coding	1673	7272382	7274385	8	-	2003	0	0	1	0	1	0	0	1	1	1	1
ENSG00000178287	SPAG11A	sperm associated antigen 11A	protein-coding	653423	7705398	7726389	8	+	20991	0	0	1	0	1	0	0	1	1	1	1
ENSG00000179172	HNRNPCL1	heterogeneous nuclear ribonucleoprotein C like 1	protein-coding	343069	12907261	12908578	1	-	1317	0	1	0	0	0	1	1	0	1	1	1
ENSG00000179750	APOBEC3B	apolipoprotein B mRNA editing enzyme catalytic subunit 3B	protein-coding	9582	39378352	39388809	22	+	10457	1	1	0	0	1	1	2	0	2	0.5	1
ENSG00000180229	HERC2P3	hect domain and RLD 2 pseudogene 3	pseudo	283755	20636346	20710715	15	-	74369	0	0	1	1	1	1	0	2	2	0.5	1
ENSG00000181935	NA	NA	NA	NA	NA	NA	NA	NA	NA	0	1	0	0	0	1	1	0	1	1	1
ENSG00000181939	OR4C15	olfactory receptor family 4 subfamily C member 15	protein-coding	81309	55321783	55322895	11	+	1112	0	1	0	0	0	1	1	0	1	1	1
ENSG00000181958	OR4A15	olfactory receptor family 4 subfamily A member 15	protein-coding	81328	55135360	55136394	11	+	1034	0	1	0	0	0	1	1	0	1	1	1
ENSG00000181961	OR4A16	olfactory receptor family 4 subfamily A member 16	protein-coding	81327	55110627	55111707	11	+	1080	0	1	0	0	0	1	1	0	1	1	1
ENSG00000182077	PTCHD3	patched domain containing 3	protein-coding	374308	27687116	27703297	10	-	16181	1	0	0	0	1	0	1	0	1	1	1
ENSG00000182170	MRGPRG	MAS related GPR family member G	protein-coding	386746	3239174	3240043	11	-	869	1	0	0	0	1	0	1	0	1	1	1
ENSG00000183130	NA	NA	NA	NA	NA	NA	NA	NA	NA	1	0	0	0	1	0	1	0	1	1	1
ENSG00000183269	OR52E8	olfactory receptor family 52 subfamily E member 8	protein-coding	390079	5877904	5878964	11	-	1060	1	1	0	0	1	1	2	0	2	0.5	1
ENSG00000183474	GTF2H2C	GTF2H2 family member C	protein-coding	728340	68856035	68889594	5	+	33559	0	0	0	1	0	1	0	1	1	1	1
ENSG00000183628	DGCR6	DiGeorge syndrome critical region gene 6	protein-coding	8214	18893541	18899601	22	+	6060	0	1	0	0	0	1	1	0	1	1	1
ENSG00000184022	OR2T10	olfactory receptor family 2 subfamily T member 10	protein-coding	127069	248756052	248757100	1	-	1048	1	0	0	0	1	0	1	0	1	1	1
ENSG00000184040	NA	NA	NA	NA	NA	NA	NA	NA	NA	1	0	0	0	1	0	1	0	1	1	1
ENSG00000184500	PROS1	protein S	protein-coding	5627	93591881	93692910	3	-	101029	0	0	0	1	0	1	0	1	1	1	1
ENSG00000184908	CLCNKB	chloride voltage-gated channel Kb	protein-coding	1188	16370272	16383803	1	+	13531	0	0	0	1	0	1	0	1	1	1	1
ENSG00000185097	NA	NA	NA	NA	NA	NA	NA	NA	NA	1	0	0	0	1	0	1	0	1	1	1
ENSG00000185182	GOLGA8EP	golgin A8 family member E, pseudogene	pseudo	390535	22705316	22715604	15	-	10288	0	0	1	1	1	1	0	2	2	0.5	1
ENSG00000185829	ARL17A	ADP ribosylation factor like GTPase 17A	protein-coding	51326	44594068	44657088	17	-	63020	0	0	0	1	0	1	0	1	1	1	1
ENSG00000186092	OR4F5	olfactory receptor family 4 subfamily F member 5	protein-coding	79501	69091	70008	1	+	917	0	0	1	0	1	0	0	1	1	1	1
ENSG00000186281	GPAT2	glycerol-3-phosphate acyltransferase 2, mitochondrial	protein-coding	150763	96687694	96701722	2	-	14028	1	0	0	0	1	0	1	0	1	1	1
ENSG00000186562	DEFB105A	defensin beta 105A	protein-coding	245908	7679488	7681411	8	-	1923	0	0	1	0	1	0	0	1	1	1	1
ENSG00000186572	DEFB107A	defensin beta 107A	protein-coding	245910	7669242	7673238	8	-	3996	0	0	1	0	1	0	0	1	1	1	1
ENSG00000186579	DEFB106A	defensin beta 106A	protein-coding	245909	7682694	7686575	8	+	3881	0	0	1	0	1	0	0	1	1	1	1
ENSG00000186599	DEFB105A	defensin beta 105A	protein-coding	245908	7345191	7347115	8	+	1924	0	0	1	0	1	0	0	1	1	1	1
ENSG00000186807	NA	NA	NA	NA	NA	NA	NA	NA	NA	0	0	1	0	1	0	0	1	1	1	1
ENSG00000187082	DEFB106B	defensin beta 106B	protein-coding	503841	7340026	7343922	8	-	3896	0	0	1	0	1	0	0	1	1	1	1
ENSG00000187272	KRTAP9-8	keratin associated protein 9-8	protein-coding	83901	39394297	39395256	17	+	959	1	0	0	0	1	0	1	0	1	1	1
ENSG00000187545	PRAMEF10	PRAME family member 10	protein-coding	343071	12952727	12958101	1	-	5374	0	1	0	0	0	1	1	0	1	1	1
ENSG00000187667	NA	NA	NA	NA	NA	NA	NA	NA	NA	0	0	1	0	1	0	0	1	1	1	1
ENSG00000188624	IGFL3	IGF like family member 3	protein-coding	388555	46623328	46627931	19	-	4603	0	1	0	0	0	1	1	0	1	1	1
ENSG00000189306	RRP7A	ribosomal RNA processing 7 homolog A	protein-coding	27341	42905974	42915808	22	-	9834	0	0	1	0	1	0	0	1	1	1	1
ENSG00000196409	NA	NA	NA	NA	NA	NA	NA	NA	NA	0	0	1	0	1	0	0	1	1	1	1
ENSG00000196436	NPIPB15	nuclear pore complex interacting protein family member B15	protein-coding	440348	74411776	74425978	16	+	14202	0	0	1	0	1	0	0	1	1	1	1
ENSG00000196800	SPINK14	serine peptidase inhibitor Kazal type 14 (putative)	protein-coding	408187	147549296	147554961	5	+	5665	0	1	0	0	0	1	1	0	1	1	1
ENSG00000197414	NA	NA	NA	NA	NA	NA	NA	NA	NA	0	0	1	1	1	1	0	2	2	0.5	1
ENSG00000197910	NA	NA	NA	NA	NA	NA	NA	NA	NA	0	0	1	0	1	0	0	1	1	1	1
ENSG00000198129	DEFB107A	defensin beta 107A	protein-coding	245910	7353368	7366833	8	+	13465	0	0	1	0	1	0	0	1	1	1	1
ENSG00000198250	NA	NA	NA	NA	NA	NA	NA	NA	NA	0	0	1	0	1	0	0	1	1	1	1
ENSG00000198346	ZNF813	zinc finger protein 813	protein-coding	126017	53970989	54006950	19	+	35961	0	0	1	0	1	0	0	1	1	1	1
ENSG00000198445	CCT8L2	chaperonin containing TCP1 subunit 8 like 2	protein-coding	150160	17071667	17073700	22	-	2033	0	0	1	0	1	0	0	1	1	1	1
ENSG00000198865	CCDC152	coiled-coil domain containing 152	protein-coding	100129792	42756903	42802462	5	+	45559	0	1	0	0	0	1	1	0	1	1	1
ENSG00000199480	NA	NA	NA	NA	NA	NA	NA	NA	NA	0	0	1	0	1	0	0	1	1	1	1
ENSG00000200366	RNU6-511P	RNA, U6 small nuclear 511, pseudogene	pseudo	106479793	93695873	93695979	3	+	106	0	0	0	1	0	1	0	1	1	1	1
ENSG00000200779	RNU6-105P	RNA, U6 small nuclear 105, pseudogene	pseudo	106481210	71606885	71606988	2	-	103	0	1	0	0	0	1	1	0	1	1	1
ENSG00000201415	RNA5SP204	RNA, 5S ribosomal pseudogene 204	pseudo	100873465	17722017	17722134	6	-	117	0	0	0	1	0	1	0	1	1	1	1
ENSG00000202167	RNU1-114P	RNA, U1 small nuclear 114, pseudogene	pseudo	106481626	149146714	149146879	1	-	165	0	0	1	0	1	0	0	1	1	1	1
ENSG00000203817	NA	NA	NA	NA	NA	NA	NA	NA	NA	0	0	1	0	1	0	0	1	1	1	1
ENSG00000203818	NA	NA	NA	NA	NA	NA	NA	NA	NA	0	0	1	0	1	0	0	1	1	1	1
ENSG00000204174	NPY4R	neuropeptide Y receptor Y4	protein-coding	5540	47083534	47088320	10	+	4786	0	0	1	0	1	0	0	1	1	1	1
ENSG00000204175	GPRIN2	G protein regulated inducer of neurite outgrowth 2	protein-coding	9721	46994087	47005643	10	+	11556	0	0	1	0	1	0	0	1	1	1	1
ENSG00000204176	SYT15	synaptotagmin 15	protein-coding	83849	46955444	46971400	10	-	15956	0	0	1	0	1	0	0	1	1	1	1
ENSG00000204177	BMS1P1	BMS1 pseudogene 1	pseudo	399761	46749775	46761198	10	-	11423	0	0	1	0	1	0	0	1	1	1	1
ENSG00000204338	CYP21A1P	cytochrome P450 family 21 subfamily A member 1, pseudogene	pseudo	1590	31973466	31976176	6	+	2710	0	0	0	1	0	1	0	1	1	1	1
ENSG00000204449	TRIM49C	tripartite motif containing 49C	protein-coding	642612	89764274	89806558	11	+	42284	1	0	0	0	1	0	1	0	1	1	1
ENSG00000204472	AIF1	allograft inflammatory factor 1	protein-coding	199	31582961	31584798	6	+	1837	0	1	0	0	0	1	1	0	1	1	1
ENSG00000204508	NA	NA	NA	NA	NA	NA	NA	NA	NA	0	1	0	0	0	1	1	0	1	1	1
ENSG00000204510	PRAMEF7	PRAME family member 7	protein-coding	441871	12976450	12980569	1	+	4119	0	1	0	0	0	1	1	0	1	1	1
ENSG00000204513	NA	NA	NA	NA	NA	NA	NA	NA	NA	0	1	0	0	0	1	1	0	1	1	1
ENSG00000204873	KRTAP9-3	keratin associated protein 9-3	protein-coding	83900	39388715	39389705	17	+	990	1	0	0	0	1	0	1	0	1	1	1
ENSG00000204941	PSG5	pregnancy specific beta-1-glycoprotein 5	protein-coding	5673	43670408	43690688	19	-	20280	1	1	0	0	1	1	2	0	2	0.5	1
ENSG00000205485	LOC100133091	uncharacterized LOC100133091	ncRNA	100133091	76178935	76180837	7	+	1902	0	0	1	0	1	0	0	1	1	1	1
ENSG00000205496	OR51A2	olfactory receptor family 51 subfamily A member 2	protein-coding	401667	4976002	4976943	11	-	941	1	0	0	0	1	0	1	0	1	1	1
ENSG00000205765	C5orf51	chromosome 5 open reading frame 51	protein-coding	285636	41904451	41921738	5	+	17287	0	1	0	0	0	1	1	0	1	1	1
ENSG00000205809	KLRC2	killer cell lectin like receptor C2	protein-coding	3822	10583198	10594899	12	-	11701	1	0	0	0	1	0	1	0	1	1	1
ENSG00000205918	PDPK2P	3-phosphoinositide dependent protein kinase 2, pseudogene	pseudo	653650	2666454	2692433	16	-	25979	0	0	0	1	0	1	0	1	1	1	1
ENSG00000206047	DEFA1	defensin alpha 1	protein-coding	1667	6835171	6837602	8	-	2431	0	0	1	0	1	0	0	1	1	1	1
ENSG00000206127	GOLGA8O	golgin A8 family member O	protein-coding	728047	32737307	32747835	15	-	10528	0	0	0	1	0	1	0	1	1	1	1
ENSG00000206737	RNVU1-18	RNA, variant U1 small nuclear 18	snRNA	26863	149224058	149224221	1	-	163	0	0	1	0	1	0	0	1	1	1	1
ENSG00000206881	RNU6-190P	RNA, U6 small nuclear 190, pseudogene	pseudo	106481236	17619764	17619865	6	+	101	0	0	0	1	0	1	0	1	1	1	1
ENSG00000206987	NA	NA	NA	NA	NA	NA	NA	NA	NA	0	0	0	1	0	1	0	1	1	1	1
ENSG00000206991	RNU6-610P	RNA, U6 small nuclear 610, pseudogene	pseudo	106479835	43929830	43929936	15	-	106	1	0	0	0	1	0	1	0	1	1	1
ENSG00000207005	RNU1-2	RNA, U1 small nuclear 2	snRNA	26870	17222475	17222638	1	+	163	0	0	1	0	1	0	0	1	1	1	1
ENSG00000207097	RNU6-614P	RNA, U6 small nuclear 614, pseudogene	pseudo	106481375	14419904	14420010	21	+	106	0	0	1	0	1	0	0	1	1	1	1
ENSG00000207135	RNU6-452P	RNA, U6 small nuclear 452, pseudogene	pseudo	106481322	27624430	27624536	10	-	106	1	0	0	0	1	0	1	0	1	1	1
ENSG00000207257	RNU6-18P	RNA, U6 small nuclear 18, pseudogene	pseudo	106478916	32576353	32576459	15	+	106	0	1	0	1	0	2	1	1	2	1	1
ENSG00000207349	RNVU1-17	RNA, variant U1 small nuclear 17	snRNA	101954269	149194106	149194269	1	-	163	0	0	1	0	1	0	0	1	1	1	1
ENSG00000207434	RNU6-1072P	RNA, U6 small nuclear 1072, pseudogene	pseudo	106480037	12982374	12982480	1	+	106	0	1	0	0	0	1	1	0	1	1	1
ENSG00000211455	STK38L	serine/threonine kinase 38 like	protein-coding	23012	27396901	27478892	12	+	81991	0	0	0	1	0	1	0	1	1	1	1
ENSG00000211941	IGHV3-11	immunoglobulin heavy variable 3-11	other	28450	106573233	106573800	14	-	567	0	0	1	0	1	0	0	1	1	1	1
ENSG00000211942	IGHV3-13	immunoglobulin heavy variable 3-13	other	28449	106586137	106586667	14	-	530	0	0	1	0	1	0	0	1	1	1	1
ENSG00000211943	IGHV3-15	immunoglobulin heavy variable 3-15	other	28448	106610313	106610852	14	-	539	0	0	1	0	1	0	0	1	1	1	1
ENSG00000211944	IGHV3-16	immunoglobulin heavy variable 3-16 (non-functional)	other	28447	106621894	106622419	14	-	525	0	0	1	0	1	0	0	1	1	1	1
ENSG00000211945	IGHV1-18	immunoglobulin heavy variable 1-18	other	28468	106641563	106642056	14	-	493	0	0	1	0	1	0	0	1	1	1	1
ENSG00000211946	IGHV3-20	immunoglobulin heavy variable 3-20	other	28445	106667581	106668095	14	-	514	0	0	1	0	1	0	0	1	1	1	1
ENSG00000211947	IGHV3-21	immunoglobulin heavy variable 3-21	other	28444	106691673	106692203	14	-	530	0	0	1	0	1	0	0	1	1	1	1
ENSG00000211949	IGHV3-23	immunoglobulin heavy variable 3-23	other	28442	106725201	106725733	14	-	532	0	0	1	0	1	0	0	1	1	1	1
ENSG00000211950	IGHV1-24	immunoglobulin heavy variable 1-24	other	28467	106733144	106733639	14	-	495	0	0	1	0	1	0	0	1	1	1	1
ENSG00000211951	IGHV2-26	immunoglobulin heavy variable 2-26	other	28455	106757650	106758116	14	-	466	0	0	1	0	1	0	0	1	1	1	1
ENSG00000211952	IGHV4-28	immunoglobulin heavy variable 4-28	other	28400	106780513	106781017	14	-	504	0	0	1	0	1	0	0	1	1	1	1
ENSG00000211953	NA	NA	NA	NA	NA	NA	NA	NA	NA	0	0	1	0	1	0	0	1	1	1	1
ENSG00000211958	IGHV3-38	immunoglobulin heavy variable 3-38 (non-functional)	other	28429	106866406	106866934	14	-	528	0	0	1	0	1	0	0	1	1	1	1
ENSG00000211961	IGHV1-45	immunoglobulin heavy variable 1-45	other	28466	106962931	106963424	14	-	493	0	0	1	0	1	0	0	1	1	1	1
ENSG00000211962	IGHV1-46	immunoglobulin heavy variable 1-46	other	28465	106967049	106967788	14	-	739	0	0	1	0	1	0	0	1	1	1	1
ENSG00000211964	IGHV3-48	immunoglobulin heavy variable 3-48	other	28424	106993814	106994346	14	-	532	0	0	1	0	1	0	0	1	1	1	1
ENSG00000211965	IGHV3-49	immunoglobulin heavy variable 3-49	other	28423	107012938	107013477	14	-	539	0	0	1	0	1	0	0	1	1	1	1
ENSG00000211966	IGHV5-51	immunoglobulin heavy variable 5-51	other	28388	107034729	107035221	14	-	492	0	0	1	0	1	0	0	1	1	1	1
ENSG00000211967	IGHV3-53	immunoglobulin heavy variable 3-53	other	28420	107048672	107049341	14	-	669	0	0	1	0	1	0	0	1	1	1	1
ENSG00000211968	IGHV1-58	immunoglobulin heavy variable 1-58	other	28464	107078373	107078869	14	-	496	0	0	1	0	1	0	0	1	1	1	1
ENSG00000211970	IGHV4-61	immunoglobulin heavy variable 4-61	other	28391	107095126	107095662	14	-	536	0	0	1	0	1	0	0	1	1	1	1
ENSG00000211972	IGHV3-66	immunoglobulin heavy variable 3-66	other	28412	107131033	107131560	14	-	527	0	0	1	0	1	0	0	1	1	1	1
ENSG00000211973	IGHV1-69	immunoglobulin heavy variable 1-69	other	28461	107169931	107170428	14	-	497	0	0	1	0	1	0	0	1	1	1	1
ENSG00000212044	NA	NA	NA	NA	NA	NA	NA	NA	NA	0	0	1	0	1	0	0	1	1	1	1
ENSG00000212952	NA	NA	NA	NA	NA	NA	NA	NA	NA	0	0	1	0	1	0	0	1	1	1	1
ENSG00000214401	KANSL1-AS1	KANSL1 antisense RNA 1	ncRNA	644246	44270942	44274089	17	+	3147	0	0	1	0	1	0	0	1	1	1	1
ENSG00000215033	NA	NA	NA	NA	NA	NA	NA	NA	NA	0	0	1	0	1	0	0	1	1	1	1
ENSG00000215154	LOC652276	potassium channel tetramerization domain containing 5 pseudogene	pseudo	652276	2653475	2664072	16	+	10597	0	0	0	1	0	1	0	1	1	1	1
ENSG00000215356	ZNF705B	zinc finger protein 705B	protein-coding	100132396	7783859	7812271	8	+	28412	0	0	1	0	1	0	0	1	1	1	1
ENSG00000215405	NA	NA	NA	NA	NA	NA	NA	NA	NA	0	0	1	1	1	1	0	2	2	0.5	1
ENSG00000215977	NA	NA	NA	NA	NA	NA	NA	NA	NA	0	0	1	0	1	0	0	1	1	1	1
ENSG00000216194	NA	NA	NA	NA	NA	NA	NA	NA	NA	0	0	1	0	1	0	0	1	1	1	1
ENSG00000216206	NA	NA	NA	NA	NA	NA	NA	NA	NA	0	0	1	0	1	0	0	1	1	1	1
ENSG00000218823	PAPOLB	poly(A) polymerase beta	protein-coding	56903	4897364	4901625	7	-	4261	0	1	0	0	0	1	1	0	1	1	1
ENSG00000221000	NA	NA	NA	NA	NA	NA	NA	NA	NA	0	0	1	1	1	1	0	2	2	0.5	1
ENSG00000221027	NA	NA	NA	NA	NA	NA	NA	NA	NA	0	0	1	0	1	0	0	1	1	1	1
ENSG00000221084	NA	NA	NA	NA	NA	NA	NA	NA	NA	0	0	1	0	1	0	0	1	1	1	1
ENSG00000221093	NA	NA	NA	NA	NA	NA	NA	NA	NA	0	0	1	0	1	0	0	1	1	1	1
ENSG00000221104	NA	NA	NA	NA	NA	NA	NA	NA	NA	0	0	1	1	1	1	0	2	2	0.5	1
ENSG00000221180	NA	NA	NA	NA	NA	NA	NA	NA	NA	0	0	1	0	1	0	0	1	1	1	1
ENSG00000221249	NA	NA	NA	NA	NA	NA	NA	NA	NA	0	0	1	0	1	0	0	1	1	1	1
ENSG00000221305	MIR548I3	microRNA 548i-3	ncRNA	100302186	7946463	7946611	8	-	148	0	0	1	0	1	0	0	1	1	1	1
ENSG00000221318	NA	NA	NA	NA	NA	NA	NA	NA	NA	0	0	0	1	0	1	0	1	1	1	1
ENSG00000221405	NA	NA	NA	NA	NA	NA	NA	NA	NA	0	0	0	1	0	1	0	1	1	1	1
ENSG00000221407	NA	NA	NA	NA	NA	NA	NA	NA	NA	0	0	1	0	1	0	0	1	1	1	1
ENSG00000221444	NA	NA	NA	NA	NA	NA	NA	NA	NA	0	1	0	1	0	2	1	1	2	1	1
ENSG00000221567	NA	NA	NA	NA	NA	NA	NA	NA	NA	0	0	1	0	1	0	0	1	1	1	1
ENSG00000221714	NA	NA	NA	NA	NA	NA	NA	NA	NA	0	0	1	0	1	0	0	1	1	1	1
ENSG00000222398	RNU6-554P	RNA, U6 small nuclear 554, pseudogene	pseudo	106479812	43894741	43894846	15	+	105	0	0	0	1	0	1	0	1	1	1	1
ENSG00000222578	RNA5SP345	RNA, 5S ribosomal pseudogene 345	pseudo	100873607	95573181	95573288	11	-	107	0	0	0	1	0	1	0	1	1	1	1
ENSG00000222854	RNA5SP59	RNA, 5S ribosomal pseudogene 59	pseudo	106480357	148913273	148913382	1	-	109	0	0	1	0	1	0	0	1	1	1	1
ENSG00000223648	IGHV3-64	immunoglobulin heavy variable 3-64	other	28414	107113741	107114274	14	-	533	0	0	1	0	1	0	0	1	1	1	1
ENSG00000224373	IGHV4-59	immunoglobulin heavy variable 4-59	other	28392	107081806	107083830	14	-	2024	0	0	1	0	1	0	0	1	1	1	1
ENSG00000224389	C4B	complement C4B (Chido blood group)	protein-coding	721	31982539	32003195	6	+	20656	0	0	0	1	0	1	0	1	1	1	1
ENSG00000224515	NA	NA	NA	NA	NA	NA	NA	NA	NA	0	1	0	0	0	1	1	0	1	1	1
ENSG00000225932	CTAGE4	CTAGE family member 4	protein-coding	100128553	143880559	143883146	7	+	2587	0	0	1	1	1	1	0	2	2	0.5	1
ENSG00000226232	NPIPB14P	nuclear pore complex interacting protein family member B14, pseudogene	pseudo	109729168	70010291	70030091	16	-	19800	0	0	1	0	1	0	0	1	1	1	1
ENSG00000226711	FAM66C	family with sequence similarity 66 member C	ncRNA	440078	8332805	8368747	12	+	35942	0	0	1	0	1	0	0	1	1	1	1
ENSG00000228549	LOC112267871	uncharacterized LOC112267871	ncRNA	112267871	17200203	17200346	1	+	143	0	0	1	0	1	0	0	1	1	1	1
ENSG00000228598	MACC1-AS1	MACC1 antisense RNA 1	ncRNA	100874041	20181539	20193154	7	+	11615	0	1	0	0	0	1	1	0	1	1	1
ENSG00000228695	CES1P1	carboxylesterase 1 pseudogene 1	pseudo	51716	55794460	55828070	16	+	33610	1	0	0	0	1	0	1	0	1	1	1
ENSG00000229092	NA	NA	NA	NA	NA	NA	NA	NA	NA	0	0	1	0	1	0	0	1	1	1	1
ENSG00000229183	PGA4	pepsinogen A4	protein-coding	643847	60989688	61018929	11	+	29241	0	0	1	0	1	0	0	1	1	1	1
ENSG00000229776	C2-AS1	C2 antisense RNA 1	ncRNA	102060414	32000490	32004035	6	-	3545	0	0	0	1	0	1	0	1	1	1	1
ENSG00000230186	NA	NA	NA	NA	NA	NA	NA	NA	NA	0	0	1	0	1	0	0	1	1	1	1
ENSG00000231187	LOC102724593	uncharacterized LOC102724593	ncRNA	102724593	46951472	46966835	10	+	15363	0	0	1	0	1	0	0	1	1	1	1
ENSG00000231475	IGHV4-30-2	immunoglobulin heavy variable 4-30-2	other	28398	106805209	106805716	14	-	507	0	0	1	0	1	0	0	1	1	1	1
ENSG00000231852	CYP21A2	cytochrome P450 family 21 subfamily A member 2	protein-coding	1589	32006042	32009447	6	+	3405	0	0	0	1	0	1	0	1	1	1	1
ENSG00000232300	NA	NA	NA	NA	NA	NA	NA	NA	NA	0	0	0	1	0	1	0	1	1	1	1
ENSG00000232653	GOLGA8N	golgin A8 family member N	protein-coding	643699	32885657	32896179	15	+	10522	0	0	0	1	0	1	0	1	1	1	1
ENSG00000233408	NA	NA	NA	NA	NA	NA	NA	NA	NA	0	0	1	1	1	1	0	2	2	0.5	1
ENSG00000233627	NA	NA	NA	NA	NA	NA	NA	NA	NA	0	0	0	1	0	1	0	1	1	1	1
ENSG00000233812	NA	NA	NA	NA	NA	NA	NA	NA	NA	0	0	0	1	0	1	0	1	1	1	1
ENSG00000234734	NA	NA	NA	NA	NA	NA	NA	NA	NA	0	1	0	0	0	1	1	0	1	1	1
ENSG00000235249	NA	NA	NA	NA	NA	NA	NA	NA	NA	1	0	0	0	1	0	1	0	1	1	1
ENSG00000236301	MRGPRG-AS1	MRGPRG antisense RNA 1	ncRNA	283303	3239562	3244361	11	+	4799	1	0	0	0	1	0	1	0	1	1	1
ENSG00000236398	TAS2R39	taste 2 receptor member 39	protein-coding	259285	142880512	142881528	7	+	1016	1	0	0	0	1	0	1	0	1	1	1
ENSG00000237517	NA	NA	NA	NA	NA	NA	NA	NA	NA	0	1	0	0	0	1	1	0	1	1	1
ENSG00000237683	NA	NA	NA	NA	NA	NA	NA	NA	NA	0	0	1	0	1	0	0	1	1	1	1
ENSG00000238083	LRRC37A2	leucine rich repeat containing 37 member A2	protein-coding	474170	44588877	44633016	17	+	44139	0	0	0	1	0	1	0	1	1	1	1
ENSG00000238347	NA	NA	NA	NA	NA	NA	NA	NA	NA	0	0	1	0	1	0	0	1	1	1	1
ENSG00000238405	RNA5SP311	RNA, 5S ribosomal pseudogene 311	pseudo	106480358	46742028	46742143	10	+	115	0	0	1	0	1	0	0	1	1	1	1
ENSG00000238460	NA	NA	NA	NA	NA	NA	NA	NA	NA	0	0	1	0	1	0	0	1	1	1	1
ENSG00000238529	RNU6-599P	RNA, U6 small nuclear 599, pseudogene	pseudo	106481370	44107813	44107919	9	-	106	0	0	1	0	1	0	0	1	1	1	1
ENSG00000238603	NA	NA	NA	NA	NA	NA	NA	NA	NA	0	0	1	0	1	0	0	1	1	1	1
ENSG00000239118	MIR1972-2	microRNA 1972-2	ncRNA	100422922	70064249	70064325	16	+	76	0	0	1	0	1	0	0	1	1	1	1
ENSG00000239124	NA	NA	NA	NA	NA	NA	NA	NA	NA	0	0	1	0	1	0	0	1	1	1	1
ENSG00000239334	NA	NA	NA	NA	NA	NA	NA	NA	NA	1	0	0	0	1	0	1	0	1	1	1
ENSG00000239435	NA	NA	NA	NA	NA	NA	NA	NA	NA	0	0	1	0	1	0	0	1	1	1	1
ENSG00000239492	NA	NA	NA	NA	NA	NA	NA	NA	NA	0	0	1	0	1	0	0	1	1	1	1
ENSG00000239839	DEFA3	defensin alpha 3	protein-coding	1668	6873391	6875823	8	-	2432	0	0	1	0	1	0	0	1	1	1	1
ENSG00000240038	AMY2B	amylase alpha 2B	protein-coding	280	104097322	104122151	1	+	24829	0	0	1	1	1	1	0	2	2	0.5	1
ENSG00000240247	DEFA1B	defensin alpha 1B	protein-coding	728358	6854288	6875778	8	-	21490	0	0	1	0	1	0	0	1	1	1	1
ENSG00000240929	NA	NA	NA	NA	NA	NA	NA	NA	NA	0	0	1	0	1	0	0	1	1	1	1
ENSG00000241717	VWFP1	von Willebrand factor pseudogene 1	pseudo	7451	17170993	17185367	22	-	14374	0	0	1	0	1	0	0	1	1	1	1
ENSG00000242221	PSG2	pregnancy specific beta-1-glycoprotein 2	protein-coding	5670	43568363	43586820	19	-	18457	1	1	0	0	1	1	2	0	2	0.5	1
ENSG00000242384	NA	NA	NA	NA	NA	NA	NA	NA	NA	0	0	0	1	0	1	0	1	1	1	1
ENSG00000243073	PRAMEF4	PRAME family member 4	protein-coding	400735	12939045	12946025	1	-	6980	0	1	0	0	0	1	1	0	1	1	1
ENSG00000243480	AMY2A	amylase alpha 2A	protein-coding	279	104159999	104168402	1	+	8403	0	1	1	1	1	2	1	2	3	1	1
ENSG00000243536	NA	NA	NA	NA	NA	NA	NA	NA	NA	0	0	1	0	1	0	0	1	1	1	1
ENSG00000244050	DEFB109F	defensin beta 109F (pseudogene)	pseudo	110806268	8352195	8359306	12	-	7111	0	0	1	0	1	0	0	1	1	1	1
ENSG00000244280	ECEL1P2	endothelin converting enzyme like 1 pseudogene 2	pseudo	347694	233251411	233252167	2	-	756	1	0	0	0	1	0	1	0	1	1	1
ENSG00000244682	NA	NA	NA	NA	NA	NA	NA	NA	NA	0	1	1	0	1	1	1	1	2	1	1
ENSG00000244731	C4A	complement C4A (Rodgers blood group)	protein-coding	720	31949801	31970458	6	+	20657	0	0	0	1	0	1	0	1	1	1	1
ENSG00000245311	ARNTL2-AS1	ARNTL2 antisense RNA 1	ncRNA	101928646	27542722	27599558	12	-	56836	0	0	0	1	0	1	0	1	1	1	1
ENSG00000248477	NAIPP3	NAIP pseudogene 3	pseudo	643784	68914140	68919273	5	+	5133	0	0	0	1	0	1	0	1	1	1	1
ENSG00000249263	PARP4P3	poly(ADP-ribose) polymerase family member 4 pseudogene 3	pseudo	107133524	17134782	17140518	22	-	5736	0	0	1	0	1	0	0	1	1	1	1
ENSG00000249310	APOBEC3B-AS1	APOBEC3B antisense RNA 1	ncRNA	100874530	39387564	39394214	22	-	6650	0	1	0	0	0	1	1	0	1	1	1
ENSG00000249437	NAIP	NLR family apoptosis inhibitory protein	protein-coding	4671	70264310	70320941	5	-	56631	0	0	0	1	0	1	0	1	1	1	1
ENSG00000249931	GOLGA8K	golgin A8 family member K	protein-coding	653125	32684983	32695396	15	-	10413	0	0	0	1	0	1	0	1	1	1	1
ENSG00000250687	NA	NA	NA	NA	NA	NA	NA	NA	NA	0	0	1	0	1	0	0	1	1	1	1
ENSG00000250722	SELENOP	selenoprotein P	protein-coding	6414	42799982	42887494	5	-	87512	0	1	0	0	0	1	1	0	1	1	1
ENSG00000250764	NA	NA	NA	NA	NA	NA	NA	NA	NA	0	0	1	0	1	0	0	1	1	1	1
ENSG00000251727	RNU6-488P	RNA, U6 small nuclear 488, pseudogene	pseudo	106479782	93562608	93562706	3	+	98	0	0	0	1	0	1	0	1	1	1	1
ENSG00000252105	RNU1-143P	RNA, U1 small nuclear 143, pseudogene	pseudo	106481634	149286177	149286322	1	-	145	0	0	1	0	1	0	0	1	1	1	1
ENSG00000252135	RNU1-155P	RNA, U1 small nuclear 155 pseudogene	pseudo	115409986	143670468	143670602	1	-	134	0	0	1	0	1	0	0	1	1	1	1
ENSG00000252683	NA	NA	NA	NA	NA	NA	NA	NA	NA	0	1	0	0	0	1	1	0	1	1	1
ENSG00000252698	NA	NA	NA	NA	NA	NA	NA	NA	NA	0	0	1	0	1	0	0	1	1	1	1
ENSG00000252826	RNVU1-23	RNA, variant U1 small nuclear 23	pseudo	106481620	149215166	149215300	1	-	134	0	0	1	0	1	0	0	1	1	1	1
ENSG00000252993	NA	NA	NA	NA	NA	NA	NA	NA	NA	0	0	1	0	1	0	0	1	1	1	1
ENSG00000253131	IGHV7-56	immunoglobulin heavy variable 7-56 (pseudogene)	pseudo	28380	107065772	107066206	14	-	434	0	0	1	0	1	0	0	1	1	1	1
ENSG00000253132	IGHV3-62	immunoglobulin heavy variable 3-62 (pseudogene)	pseudo	28416	107099145	107099588	14	-	443	0	0	1	0	1	0	0	1	1	1	1
ENSG00000253149	IGHVII-28-1	immunoglobulin heavy variable (II)-28-1 (pseudogene)	pseudo	28372	106810597	106810633	14	-	36	0	0	1	0	1	0	0	1	1	1	1
ENSG00000253169	IGHVII-65-1	immunoglobulin heavy variable (II)-65-1 (pseudogene)	pseudo	28359	107127813	107128060	14	-	247	0	0	1	0	1	0	0	1	1	1	1
ENSG00000253193	NA	NA	NA	NA	NA	NA	NA	NA	NA	0	0	1	0	1	0	0	1	1	1	1
ENSG00000253209	IGHV3-65	immunoglobulin heavy variable 3-65 (pseudogene)	pseudo	28413	107122108	107122548	14	-	440	0	0	1	0	1	0	0	1	1	1	1
ENSG00000253241	IGHV3-50	immunoglobulin heavy variable 3-50 (pseudogene)	pseudo	28422	107022105	107022543	14	-	438	0	0	1	0	1	0	0	1	1	1	1
ENSG00000253274	IGHV1-67	immunoglobulin heavy variable 1-67 (pseudogene)	pseudo	28463	107136620	107137059	14	-	439	0	0	1	0	1	0	0	1	1	1	1
ENSG00000253345	IGHVII-22-1	immunoglobulin heavy variable (II)-22-1 (pseudogene)	pseudo	28374	106719955	106720219	14	-	264	0	0	1	0	1	0	0	1	1	1	1
ENSG00000253367	IGHVIII-25-1	immunoglobulin heavy variable (III)-25-1 (pseudogene)	pseudo	28348	106750162	106750402	14	-	240	0	0	1	0	1	0	0	1	1	1	1
ENSG00000253386	IGHVII-49-1	immunoglobulin heavy variable (II)-49-1 (pseudogene)	pseudo	28364	107020363	107020586	14	-	223	0	0	1	0	1	0	0	1	1	1	1
ENSG00000253412	IGHVIII-13-1	immunoglobulin heavy variable (III)-13-1 (pseudogene)	pseudo	28351	106598995	106599285	14	-	290	0	0	1	0	1	0	0	1	1	1	1
ENSG00000253441	IGHV3-25	immunoglobulin heavy variable 3-25 (pseudogene)	pseudo	28441	106745623	106746073	14	-	450	0	0	1	0	1	0	0	1	1	1	1
ENSG00000253458	IGHVII-15-1	immunoglobulin heavy variable (II)-15-1 (pseudogene)	pseudo	28376	106620270	106620489	14	-	219	0	0	1	0	1	0	0	1	1	1	1
ENSG00000253462	IGHVIII-26-1	immunoglobulin heavy variable (III)-26-1 (pseudogene)	pseudo	28347	106765678	106765927	14	-	249	0	0	1	0	1	0	0	1	1	1	1
ENSG00000253464	NA	NA	NA	NA	NA	NA	NA	NA	NA	0	0	1	0	1	0	0	1	1	1	1
ENSG00000253465	NA	NA	NA	NA	NA	NA	NA	NA	NA	0	0	1	0	1	0	0	1	1	1	1
ENSG00000253482	IGHVII-26-2	immunoglobulin heavy variable (II)-26-2 (pseudogene)	pseudo	28373	106770914	106771238	14	-	324	0	0	1	0	1	0	0	1	1	1	1
ENSG00000253491	IGHVII-30-1	immunoglobulin heavy variable (II)-30-1 (pseudogene)	pseudo	28371	106798646	106798877	14	-	231	0	0	1	0	1	0	0	1	1	1	1
ENSG00000253545	IGHV3-52	immunoglobulin heavy variable 3-52 (pseudogene)	pseudo	28421	107042360	107042810	14	-	450	0	0	1	0	1	0	0	1	1	1	1
ENSG00000253587	IGHV3-30-2	immunoglobulin heavy variable 3-30-2 (pseudogene)	pseudo	28438	106800319	106800757	14	-	438	0	0	1	0	1	0	0	1	1	1	1
ENSG00000253635	IGHVIII-67-3	immunoglobulin heavy variable (III)-67-3 (pseudogene)	pseudo	28341	107148674	107148905	14	-	231	0	0	1	0	1	0	0	1	1	1	1
ENSG00000253689	NA	NA	NA	NA	NA	NA	NA	NA	NA	0	0	1	0	1	0	0	1	1	1	1
ENSG00000253703	IGHV1-68	immunoglobulin heavy variable 1-68 (pseudogene)	pseudo	28462	107159869	107160163	14	-	294	0	0	1	0	1	0	0	1	1	1	1
ENSG00000253709	IGHV1-14	immunoglobulin heavy variable 1-14 (pseudogene)	pseudo	28470	106602580	106602820	14	-	240	0	0	1	0	1	0	0	1	1	1	1
ENSG00000253714	IGHVII-53-1	immunoglobulin heavy variable (II)-53-1 (pseudogene)	pseudo	28362	107055682	107055936	14	-	254	0	0	1	0	1	0	0	1	1	1	1
ENSG00000253742	IGHV3-60	immunoglobulin heavy variable 3-60 (pseudogene)	pseudo	28417	107087202	107087658	14	-	456	0	0	1	0	1	0	0	1	1	1	1
ENSG00000253747	IGHVII-62-1	immunoglobulin heavy variable (II)-62-1 (pseudogene)	pseudo	28360	107106555	107106789	14	-	234	0	0	1	0	1	0	0	1	1	1	1
ENSG00000253759	IGHV3-57	immunoglobulin heavy variable 3-57 (pseudogene)	pseudo	28418	107074907	107075186	14	-	279	0	0	1	0	1	0	0	1	1	1	1
ENSG00000253808	NA	NA	NA	NA	NA	NA	NA	NA	NA	0	0	1	0	1	0	0	1	1	1	1
ENSG00000253820	NA	NA	NA	NA	NA	NA	NA	NA	NA	0	0	1	0	1	0	0	1	1	1	1
ENSG00000253862	IGHVIII-47-1	immunoglobulin heavy variable (III)-47-1 (pseudogene)	pseudo	28344	106987143	106987473	14	-	330	0	0	1	0	1	0	0	1	1	1	1
ENSG00000253883	IGHV3-19	immunoglobulin heavy variable 3-19 (pseudogene)	pseudo	28446	106653371	106653661	14	-	290	0	0	1	0	1	0	0	1	1	1	1
ENSG00000253895	IGHVII-44-2	immunoglobulin heavy variable (II)-44-2 (pseudogene)	pseudo	28366	106950148	106950397	14	-	249	0	0	1	0	1	0	0	1	1	1	1
ENSG00000253936	IGHV3-63	immunoglobulin heavy variable 3-63 (pseudogene)	pseudo	28415	107108252	107108696	14	-	444	0	0	1	0	1	0	0	1	1	1	1
ENSG00000253941	IGHVII-51-2	immunoglobulin heavy variable (II)-51-2 (pseudogene)	pseudo	28363	107040702	107040960	14	-	258	0	0	1	0	1	0	0	1	1	1	1
ENSG00000253957	IGHV3-22	immunoglobulin heavy variable 3-22 (pseudogene)	pseudo	28443	106714360	106714821	14	-	461	0	0	1	0	1	0	0	1	1	1	1
ENSG00000253996	NA	NA	NA	NA	NA	NA	NA	NA	NA	0	0	1	0	1	0	0	1	1	1	1
ENSG00000254036	IGHVIII-67-2	immunoglobulin heavy variable (III)-67-2 (pseudogene)	pseudo	28342	107143130	107143217	14	-	87	0	0	1	0	1	0	0	1	1	1	1
ENSG00000254045	NA	NA	NA	NA	NA	NA	NA	NA	NA	0	0	1	0	1	0	0	1	1	1	1
ENSG00000254046	IGHV1-17	immunoglobulin heavy variable 1-17 (pseudogene)	pseudo	28469	106631031	106631449	14	-	418	0	0	1	0	1	0	0	1	1	1	1
ENSG00000254052	IGHVIII-67-4	immunoglobulin heavy variable (III)-67-4 (pseudogene)	pseudo	28340	107151119	107151414	14	-	295	0	0	1	0	1	0	0	1	1	1	1
ENSG00000254117	NA	NA	NA	NA	NA	NA	NA	NA	NA	0	0	1	0	1	0	0	1	1	1	1
ENSG00000254167	IGHV8-51-1	immunoglobulin heavy variable IGHV8-51-1 (non-functional)	pseudo	28343	107039493	107039794	14	-	301	0	0	1	0	1	0	0	1	1	1	1
ENSG00000254174	IGHV1-12	immunoglobulin heavy variable 1-12 (pseudogene)	pseudo	28471	106579014	106579303	14	-	289	0	0	1	0	1	0	0	1	1	1	1
ENSG00000254210	NA	NA	NA	NA	NA	NA	NA	NA	NA	0	0	1	0	1	0	0	1	1	1	1
ENSG00000254214	NA	NA	NA	NA	NA	NA	NA	NA	NA	0	0	1	0	1	0	0	1	1	1	1
ENSG00000254215	NA	NA	NA	NA	NA	NA	NA	NA	NA	0	0	1	0	1	0	0	1	1	1	1
ENSG00000254289	IGHV3-29	immunoglobulin heavy variable 3-29 (pseudogene)	pseudo	28440	106812091	106812517	14	-	426	0	0	1	0	1	0	0	1	1	1	1
ENSG00000254326	IGHV7-27	immunoglobulin heavy variable 7-27 (pseudogene)	pseudo	28383	106774086	106774499	14	-	413	0	0	1	0	1	0	0	1	1	1	1
ENSG00000254329	IGHVII-60-1	immunoglobulin heavy variable (II)-60-1 (pseudogene)	pseudo	28361	107093723	107093978	14	-	255	0	0	1	0	1	0	0	1	1	1	1
ENSG00000254395	IGHV4-55	immunoglobulin heavy variable 4-55 (pseudogene)	pseudo	28393	107062111	107062561	14	-	450	0	0	1	0	1	0	0	1	1	1	1
ENSG00000254951	LOC283299	uncharacterized LOC283299	ncRNA	283299	7775940	7927502	11	-	151562	1	0	0	0	1	0	1	0	1	1	1
ENSG00000255185	PDXDC2P	pyridoxal dependent decarboxylase domain containing 2, pseudogene	pseudo	109731405	70044654	70099679	16	-	55025	0	0	1	0	1	0	0	1	1	1	1
ENSG00000255251	PRR23D1	proline rich 23 domain containing 1	protein-coding	100131608	7397150	7399972	8	+	2822	0	0	1	0	1	0	0	1	1	1	1
ENSG00000255378	PRR23D2	proline rich 23 domain containing 2	protein-coding	100133251	7636113	7638935	8	-	2822	0	0	1	0	1	0	0	1	1	1	1
ENSG00000255583	NA	NA	NA	NA	NA	NA	NA	NA	NA	0	0	1	0	1	0	0	1	1	1	1
ENSG00000255641	NA	NA	NA	NA	NA	NA	NA	NA	NA	1	0	0	0	1	0	1	0	1	1	1
ENSG00000256713	PGA5	pepsinogen A5	protein-coding	5222	61008514	61018920	11	+	10406	0	0	1	0	1	0	0	1	1	1	1
ENSG00000257115	OR11H12	olfactory receptor family 11 subfamily H member 12	protein-coding	440153	19377522	19378606	14	+	1084	0	0	1	0	1	0	0	1	1	1	1
ENSG00000258873	DUXA	double homeobox A	protein-coding	503835	57665389	57678811	19	-	13422	0	1	0	0	0	1	1	0	1	1	1
ENSG00000259145	NA	NA	NA	NA	NA	NA	NA	NA	NA	0	0	1	0	1	0	0	1	1	1	1
ENSG00000259184	NA	NA	NA	NA	NA	NA	NA	NA	NA	0	0	1	1	1	1	0	2	2	0.5	1
ENSG00000259271	ANKRD62P1	ankyrin repeat domain 62 pseudogene 1	pseudo	107080639	17151980	17160383	22	-	8403	0	0	1	0	1	0	0	1	1	1	1
ENSG00000259344	NA	NA	NA	NA	NA	NA	NA	NA	NA	0	0	1	0	1	0	0	1	1	1	1
ENSG00000259400	NA	NA	NA	NA	NA	NA	NA	NA	NA	0	0	1	1	1	1	0	2	2	0.5	1
ENSG00000259425	NA	NA	NA	NA	NA	NA	NA	NA	NA	0	0	1	0	1	0	0	1	1	1	1
ENSG00000259455	NA	NA	NA	NA	NA	NA	NA	NA	NA	0	0	1	0	1	0	0	1	1	1	1
ENSG00000259480	NA	NA	NA	NA	NA	NA	NA	NA	NA	0	0	1	0	1	0	0	1	1	1	1
ENSG00000260436	NA	NA	NA	NA	NA	NA	NA	NA	NA	0	0	0	1	0	1	0	1	1	1	1
ENSG00000260628	NA	NA	NA	NA	NA	NA	NA	NA	NA	0	0	1	0	1	0	0	1	1	1	1
ENSG00000260932	NA	NA	NA	NA	NA	NA	NA	NA	NA	0	1	0	0	0	1	1	0	1	1	1
ENSG00000261093	NA	NA	NA	NA	NA	NA	NA	NA	NA	0	0	0	1	0	1	0	1	1	1	1
ENSG00000261140	NA	NA	NA	NA	NA	NA	NA	NA	NA	0	0	0	1	0	1	0	1	1	1	1
ENSG00000261170	LOC107984827	uncharacterized LOC107984827	ncRNA	107984827	74456018	74469152	16	+	13134	0	0	1	0	1	0	0	1	1	1	1
ENSG00000261272	MUC22	mucin 22	protein-coding	100507679	30978251	31003179	6	+	24928	0	1	0	0	0	1	1	0	1	1	1
ENSG00000261279	ULK4P1	ULK4 pseudogene 1	pseudo	89838	32702759	32720517	15	-	17758	0	0	0	1	0	1	0	1	1	1	1
ENSG00000261575	NA	NA	NA	NA	NA	NA	NA	NA	NA	0	0	1	0	1	0	0	1	1	1	1
ENSG00000263811	MIR3675	microRNA 3675	ncRNA	100500876	17185444	17185516	1	-	72	0	0	1	0	1	0	0	1	1	1	1
ENSG00000263930	NA	NA	NA	NA	NA	NA	NA	NA	NA	0	0	1	1	1	1	0	2	2	0.5	1
ENSG00000264022	NA	NA	NA	NA	NA	NA	NA	NA	NA	0	0	1	0	1	0	0	1	1	1	1
ENSG00000264076	NA	NA	NA	NA	NA	NA	NA	NA	NA	0	0	1	0	1	0	0	1	1	1	1
ENSG00000264257	KIR3DP1	killer cell immunoglobulin like receptor, three Ig domains pseudogene 1	pseudo	548594	55297807	55301770	19	+	3963	1	0	1	1	2	1	1	2	3	1	1
ENSG00000265106	NA	NA	NA	NA	NA	NA	NA	NA	NA	0	0	1	0	1	0	0	1	1	1	1
ENSG00000265166	NA	NA	NA	NA	NA	NA	NA	NA	NA	0	0	1	0	1	0	0	1	1	1	1
ENSG00000265826	NA	NA	NA	NA	NA	NA	NA	NA	NA	1	0	1	0	2	0	1	1	2	1	1
ENSG00000266218	NA	NA	NA	NA	NA	NA	NA	NA	NA	0	0	0	1	0	1	0	1	1	1	1
ENSG00000266547	NA	NA	NA	NA	NA	NA	NA	NA	NA	0	1	0	0	0	1	1	0	1	1	1
ENSG00000266811	NA	NA	NA	NA	NA	NA	NA	NA	NA	0	0	1	0	1	0	0	1	1	1	1
ENSG00000268640	NA	NA	NA	NA	NA	NA	NA	NA	NA	0	0	1	0	1	0	0	1	1	1	1
ENSG00000268708	NA	NA	NA	NA	NA	NA	NA	NA	NA	0	0	1	0	1	0	0	1	1	1	1
ENSG00000268759	NA	NA	NA	NA	NA	NA	NA	NA	NA	0	0	0	1	0	1	0	1	1	1	1
ENSG00000268923	NA	NA	NA	NA	NA	NA	NA	NA	NA	0	0	0	1	0	1	0	1	1	1	1
ENSG00000268925	NA	NA	NA	NA	NA	NA	NA	NA	NA	0	1	0	0	0	1	1	0	1	1	1
ENSG00000268936	NA	NA	NA	NA	NA	NA	NA	NA	NA	0	0	0	1	0	1	0	1	1	1	1
ENSG00000269937	NA	NA	NA	NA	NA	NA	NA	NA	NA	0	0	0	1	0	1	0	1	1	1	1
ENSG00000271745	NA	NA	NA	NA	NA	NA	NA	NA	NA	0	0	1	0	1	0	0	1	1	1	1
ENSG00000272234	NA	NA	NA	NA	NA	NA	NA	NA	NA	0	1	0	0	0	1	1	0	1	1	1
ENSG00000272269	NUP153-AS1	NUP153 antisense RNA 1	ncRNA	105374952	17706488	17707575	6	+	1087	0	0	0	1	0	1	0	1	1	1	1
ENSG00000272302	NA	NA	NA	NA	NA	NA	NA	NA	NA	0	0	1	0	1	0	0	1	1	1	1
ENSG00000272817	NA	NA	NA	NA	NA	NA	NA	NA	NA	0	0	1	0	1	0	0	1	1	1	1
ENSG00000273164	NA	NA	NA	NA	NA	NA	NA	NA	NA	0	1	0	0	0	1	1	0	1	1	1
