# Supplementary material for: Genomic Markers Associated with Cytomegalovirus DNAemia in Kidney Transplant Recipients
Source: Viruses. 2023 Nov 8;15(11):2227. doi: 10.3390/v15112227 (PMC10674338; doi:10.3390/v15112227)
Supplement: Supplementary file 1 [file viruses-15-02227-s001.zip › S6_peak_viral_load.cohortA.assoc.txt]

chr	rs	ps	n_mis	n_obs	allele1	allele0	af	beta	se	p_wald	p_lrt	p_score
1	1_13254_G_A	13254	0	36	A	G	0.014	436664.2	61020.15	4.012093e-08	4.481637e-09	4.648295e-05
1	1_13281_C_G	13281	0	36	G	C	0.028	208227.3	61337.8	0.001848587	0.0008758902	0.004150253
1	1_17036_T_C	17036	0	36	C	T	0.014	436664.2	61020.15	4.012093e-08	4.481637e-09	4.648295e-05
1	1_664652_G_A	664652	0	36	A	G	0.014	436664.2	61020.15	4.012093e-08	4.481637e-09	4.648295e-05
1	1_902108_C_T	902108	0	36	T	C	0.014	321853.0	80387.58	0.0003465485	0.0001315578	0.001525498
1	1_1139880_T_G	1139880	0	36	G	T	0.028	221561.8	58687.92	0.0006555987	0.0002708846	0.002193379
1	1_1147413_G_T	1147413	0	36	T	G	0.014	321853.0	80387.58	0.0003465485	0.0001315578	0.001525498
1	1_1163884_C_T	1163884	0	36	T	C	0.014	436664.2	61020.15	4.012093e-08	4.481637e-09	4.648295e-05
1	1_1179840_T_C	1179840	0	36	C	T	0.014	321853.0	80387.58	0.0003465485	0.0001315578	0.001525498
1	1_1226422_C_T	1226422	0	36	T	C	0.014	321853.0	80387.58	0.0003465485	0.0001315578	0.001525498
1	1_1250438_G_A	1250438	0	36	A	G	0.014	321853.0	80387.58	0.0003465485	0.0001315578	0.001525498
1	1_1273613_CT_C	1273613	0	36	C	CT	0.014	436664.2	61020.15	4.012093e-08	4.481637e-09	4.648295e-05
1	1_1273621_CG_C	1273621	0	36	C	CG	0.014	436664.2	61020.15	4.012093e-08	4.481637e-09	4.648295e-05
1	1_1273625_CTGAAG_C	1273625	0	36	C	CTGAAG	0.014	436664.2	61020.15	4.012093e-08	4.481637e-09	4.648295e-05
1	1_1323881_C_T	1323881	0	36	T	C	0.014	321853.0	80387.58	0.0003465485	0.0001315578	0.001525498
1	1_1403735_C_CCTCCCTCAG	1403735	0	36	CCTCCCTCAG	C	0.028	221553.1	58681.38	0.0006551038	0.000270653	0.002192408
1	1_1423189_G_T	1423189	0	36	T	G	0.014	321853.0	80387.58	0.0003465485	0.0001315578	0.001525498
1	1_1447877_CGCGG_C	1447877	0	36	C	CGCGG	0.014	321853.0	80387.58	0.0003465485	0.0001315578	0.001525498
1	1_1551111_C_G	1551111	0	36	G	C	0.014	321853.0	80387.58	0.0003465485	0.0001315578	0.001525498
1	1_1580662_C_G	1580662	0	36	G	C	0.014	321853.0	80387.58	0.0003465485	0.0001315578	0.001525498
1	1_1718642_C_A	1718642	0	36	A	C	0.028	208174.9	61332.04	0.001851238	0.0008773119	0.004154094
1	1_1846582_A_G	1846582	0	36	G	A	0.917	-131525.3	36295.14	0.0009946324	0.0004342889	0.002813847
1	1_1886457_AGGAAGTGCGGCTCACACC_AGGAAGTGCGGCTCACACCGGAAGTGCGGCTCACACC	1886457	0	36	AGGAAGTGCGGCTCACACCGGAAGTGCGGCTCACACC	AGGAAGTGCGGCTCACACC	0.083	97056.53	28020.18	0.001535669	0.0007100803	0.00368597
1	1_1982013_C_T	1982013	0	36	T	C	0.014	436664.2	61020.15	4.012093e-08	4.481637e-09	4.648295e-05
1	1_2234681_G_A	2234681	0	36	A	G	0.014	436664.2	61020.15	4.012093e-08	4.481637e-09	4.648295e-05
1	1_2310470_A_T	2310470	0	36	T	A	0.069	163716.4	36152.67	7.778747e-05	2.418462e-05	0.0007036397
1	1_2337194_C_T	2337194	0	36	T	C	0.069	162993.2	37593.7	0.0001352307	4.52767e-05	0.0009259247
1	1_2399131_G_A	2399131	0	36	A	G	0.014	321853.0	80387.58	0.0003465485	0.0001315578	0.001525498
1	1_2435363_A_C	2435363	0	36	C	A	0.014	321853.0	80387.58	0.0003465485	0.0001315578	0.001525498
1	1_2494330_G_A	2494330	0	36	A	G	0.111	117679.3	33997.38	0.001545583	0.0007152702	0.003701047
1	1_2519073_T_C	2519073	0	36	C	T	0.028	208167.9	61239.19	0.001826468	0.0008640413	0.004118161
1	1_2560939_C_G	2560939	0	36	G	C	0.014	321853.0	80387.58	0.0003465485	0.0001315578	0.001525498
1	1_2700191_C_T	2700191	0	36	T	C	0.028	208167.9	61239.19	0.001826468	0.0008640413	0.004118161
1	1_3327904_G_A	3327904	0	36	A	G	0.014	436664.2	61020.15	4.012093e-08	4.481637e-09	4.648295e-05
1	1_3334598_C_T	3334598	0	36	T	C	0.014	436664.2	61020.15	4.012093e-08	4.481637e-09	4.648295e-05
1	1_3382782_G_A	3382782	0	36	A	G	0.014	321853.0	80387.58	0.0003465485	0.0001315578	0.001525498
1	1_3409099_C_T	3409099	0	36	T	C	0.014	321853.0	80387.58	0.0003465485	0.0001315578	0.001525498
1	1_3417998_C_A	3417998	0	36	A	C	0.014	321853.0	80387.58	0.0003465485	0.0001315578	0.001525498
1	1_3624384_G_A	3624384	0	36	A	G	0.014	321853.0	80387.58	0.0003465485	0.0001315578	0.001525498
1	1_3638593_G_A	3638593	0	36	A	G	0.028	221559.7	58704.62	0.0006576145	0.0002718282	0.002197331
1	1_3649488_G_A	3649488	0	36	A	G	0.014	436664.2	61020.15	4.012093e-08	4.481637e-09	4.648295e-05
1	1_3703710_G_A	3703710	0	36	A	G	0.014	436664.2	61020.15	4.012093e-08	4.481637e-09	4.648295e-05
1	1_3756378_C_T	3756378	0	36	T	C	0.014	321853.0	80387.58	0.0003465485	0.0001315578	0.001525498
1	1_4847595_G_A	4847595	0	36	A	G	0.014	436664.2	61020.15	4.012093e-08	4.481637e-09	4.648295e-05
1	1_5934500_T_C	5934500	0	36	C	T	0.208	91226.68	27507.42	0.002277797	0.001109267	0.004755076
1	1_6185608_G_A	6185608	0	36	A	G	0.014	436664.2	61020.15	4.012093e-08	4.481637e-09	4.648295e-05
1	1_6270856_C_T	6270856	0	36	T	C	0.014	436664.2	61020.15	4.012093e-08	4.481637e-09	4.648295e-05
1	1_6305146_T_C	6305146	0	36	C	T	0.014	436664.2	61020.15	4.012093e-08	4.481637e-09	4.648295e-05
1	1_6309718_CG_C	6309718	0	36	C	CG	0.028	160926.5	40193.79	0.0003465485	0.0001315578	0.001525498
1	1_6410031_C_T	6410031	0	36	T	C	0.014	321853.0	80387.58	0.0003465485	0.0001315578	0.001525498
1	1_6478878_GT_G	6478878	0	36	G	GT	0.028	160926.5	40193.79	0.0003465485	0.0001315578	0.001525498
1	1_6525347_A_C	6525347	0	36	C	A	0.056	198183.5	37029.57	7.133547e-06	1.607918e-06	0.0002471772
1	1_6525351_T_C	6525351	0	36	C	T	0.014	321853.0	80387.58	0.0003465485	0.0001315578	0.001525498
1	1_6593171_G_A	6593171	0	36	A	G	0.014	436664.2	61020.15	4.012093e-08	4.481637e-09	4.648295e-05
1	1_6593172_A_T	6593172	0	36	T	A	0.014	436664.2	61020.15	4.012093e-08	4.481637e-09	4.648295e-05
1	1_6593179_G_A	6593179	0	36	A	G	0.014	436664.2	61020.15	4.012093e-08	4.481637e-09	4.648295e-05
1	1_6614665_G_T	6614665	0	36	T	G	0.028	208170.9	61319.67	0.001848169	0.0008756665	0.004149649
1	1_8415682_C_T	8415682	0	36	T	C	0.028	221575.6	58618.45	0.0006471075	0.0002669143	0.002176689
1	1_8674788_A_C	8674788	0	36	C	A	0.014	321853.0	80387.58	0.0003465485	0.0001315578	0.001525498
1	1_8716117_C_T	8716117	0	36	T	C	0.014	321853.0	80387.58	0.0003465485	0.0001315578	0.001525498
1	1_8923042_A_G	8923042	0	36	G	A	0.014	321853.0	80387.58	0.0003465485	0.0001315578	0.001525498
1	1_8935072_G_A	8935072	0	36	A	G	0.014	321853.0	80387.58	0.0003465485	0.0001315578	0.001525498
1	1_9064838_G_A	9064838	0	36	A	G	0.014	321853.0	80387.58	0.0003465485	0.0001315578	0.001525498
1	1_9783148_A_G	9783148	0	36	G	A	0.014	321853.0	80387.58	0.0003465485	0.0001315578	0.001525498
1	1_10057241_G_C	10057241	0	36	C	G	0.028	208157.4	61270.85	0.001835922	0.0008691033	0.00413189
1	1_10068428_G_A	10068428	0	36	A	G	0.014	436664.2	61020.15	4.012093e-08	4.481637e-09	4.648295e-05
1	1_10357201_C_T	10357201	0	36	T	C	0.014	321853.0	80387.58	0.0003465485	0.0001315578	0.001525498
1	1_10364260_A_G	10364260	0	36	G	A	0.028	221575.6	58618.45	0.0006471075	0.0002669143	0.002176689
1	1_10460716_AT_A	10460716	0	36	A	AT	0.014	321853.0	80387.58	0.0003465485	0.0001315578	0.001525498
1	1_10659338_C_G	10659338	0	36	G	C	0.028	223410.5	59629.74	0.0007095927	0.0002962867	0.002297936
1	1_10703203_G_GC	10703203	0	36	GC	G	0.125	118821.8	26541.91	9.025669e-05	2.86263e-05	0.0007565489
1	1_10708142_A_G	10708142	0	36	G	A	0.292	78655.75	23918.72	0.002453129	0.001206329	0.004993692
1	1_10709267_C_T	10709267	0	36	T	C	0.125	118821.8	26541.91	9.025669e-05	2.86263e-05	0.0007565489
1	1_10709309_C_G	10709309	0	36	G	C	0.264	87675.72	24561.61	0.001152977	0.00051335	0.003080714
1	1_10709441_C_T	10709441	0	36	T	C	0.264	87675.72	24561.61	0.001152977	0.00051335	0.003080714
1	1_10710849_G_GC	10710849	0	36	GC	G	0.292	78655.75	23918.72	0.002453129	0.001206329	0.004993692
1	1_10718731_CCTCTG_C	10718731	0	36	C	CCTCTG	0.167	85136.72	24307.16	0.001383193	0.0006308233	0.003450562
1	1_10725498_G_A	10725498	0	36	A	G	0.181	93401.88	24939.84	0.0007126225	0.0002977199	0.002303727
1	1_10753818_T_C	10753818	0	36	C	T	0.028	218158.8	59752.88	0.0009231345	0.0003991138	0.002689258
1	1_11119722_G_A	11119722	0	36	A	G	0.014	321853.0	80387.58	0.0003465485	0.0001315578	0.001525498
1	1_11167158_C_T	11167158	0	36	T	C	0.014	436664.2	61020.15	4.012093e-08	4.481637e-09	4.648295e-05
1	1_11317235_G_C	11317235	0	36	C	G	0.014	436664.2	61020.15	4.012093e-08	4.481637e-09	4.648295e-05
1	1_11732213_G_A	11732213	0	36	A	G	0.014	436664.2	61020.15	4.012093e-08	4.481637e-09	4.648295e-05
1	1_11782697_G_A	11782697	0	36	A	G	0.014	436664.2	61020.15	4.012093e-08	4.481637e-09	4.648295e-05
1	1_11849367_C_T	11849367	0	36	T	C	0.014	321853.0	80387.58	0.0003465485	0.0001315578	0.001525498
1	1_12030946_T_G	12030946	0	36	G	T	0.014	436664.2	61020.15	4.012093e-08	4.481637e-09	4.648295e-05
1	1_12171987_T_G	12171987	0	36	G	T	0.014	321853.0	80387.58	0.0003465485	0.0001315578	0.001525498
1	1_12261972_A_G	12261972	0	36	G	A	0.028	218158.8	59752.88	0.0009231345	0.0003991138	0.002689258
1	1_12418700_T_C	12418700	0	36	C	T	0.986	-436664.2	61020.15	4.012093e-08	4.481637e-09	4.648295e-05
1	1_12885318_C_T	12885318	0	36	T	C	0.014	321853.0	80387.58	0.0003465485	0.0001315578	0.001525498
1	1_12898756_C_T	12898756	0	36	T	C	0.028	221560.9	58687.06	0.0006555255	0.0002708503	0.002193236
1	1_12921600_C_T	12921600	0	36	T	C	0.014	321853.0	80387.58	0.0003465485	0.0001315578	0.001525498
1	1_12942119_C_T	12942119	0	36	T	C	0.25	74677.69	20681.51	0.001030406	0.000452015	0.002875172
1	1_12942399_A_G	12942399	0	36	G	A	0.222	99004.76	22002.4	8.449271e-05	2.656217e-05	0.0007325049
1	1_12953147_A_G	12953147	0	36	G	A	0.014	321853.0	80387.58	0.0003465485	0.0001315578	0.001525498
1	1_12980232_G_A	12980232	0	36	A	G	0.014	436664.2	61020.15	4.012093e-08	4.481637e-09	4.648295e-05
1	1_12998566_C_T	12998566	0	36	T	C	0.014	436664.2	61020.15	4.012093e-08	4.481637e-09	4.648295e-05
1	1_13123665_T_G	13123665	0	36	G	T	0.028	400526.3	10158.92	1.061351e-28	2.042744e-32	1.294467e-06
1	1_13219066_T_C	13219066	0	36	C	T	0.028	400526.3	10158.92	1.061351e-28	2.042744e-32	1.294467e-06
1	1_13219067_G_A	13219067	0	36	A	G	0.014	321853.0	80387.58	0.0003465485	0.0001315578	0.001525498
1	1_13219734_A_C	13219734	0	36	C	A	0.028	218158.8	59752.88	0.0009231345	0.0003991138	0.002689258
1	1_13634777_G_A	13634777	0	36	A	G	0.028	221561.8	58687.92	0.0006555987	0.0002708846	0.002193379
1	1_13910429_C_G	13910429	0	36	G	C	0.014	436664.2	61020.15	4.012093e-08	4.481637e-09	4.648295e-05
1	1_13910681_G_C	13910681	0	36	C	G	0.028	208163.7	61322.74	0.001849597	0.0008764316	0.004151716
1	1_14107195_G_T	14107195	0	36	T	G	0.028	221575.6	58618.45	0.0006471075	0.0002669143	0.002176689
1	1_15623113_A_G	15623113	0	36	G	A	0.014	436664.2	61020.15	4.012093e-08	4.481637e-09	4.648295e-05
1	1_15693861_G_A	15693861	0	36	A	G	0.028	231936.7	59560.94	0.0004711466	0.0001863175	0.001812379
1	1_15707775_A_G	15707775	0	36	G	A	0.028	231936.7	59560.94	0.0004711466	0.0001863175	0.001812379
1	1_15766734_A_C	15766734	0	36	C	A	0.472	-208165.6	61339.7	0.001854095	0.0008788437	0.004158229
1	1_15832494_G_A	15832494	0	36	A	G	0.014	321853.0	80387.58	0.0003465485	0.0001315578	0.001525498
1	1_15983010_C_T	15983010	0	36	T	C	0.014	321853.0	80387.58	0.0003465485	0.0001315578	0.001525498
1	1_16263753_C_T	16263753	0	36	T	C	0.014	436664.2	61020.15	4.012093e-08	4.481637e-09	4.648295e-05
1	1_16350315_C_A	16350315	0	36	A	C	0.014	436664.2	61020.15	4.012093e-08	4.481637e-09	4.648295e-05
1	1_16383897_C_T	16383897	0	36	T	C	0.014	436664.2	61020.15	4.012093e-08	4.481637e-09	4.648295e-05
1	1_16900912_G_A	16900912	0	36	A	G	0.028	231936.7	59560.94	0.0004711466	0.0001863175	0.001812379
1	1_16901539_G_T	16901539	0	36	T	G	0.028	221560.9	58683.75	0.000655138	0.000270669	0.002192476
1	1_16974224_C_G	16974224	0	36	G	C	0.083	136857.9	38356.34	0.001157878	0.0005158212	0.003088797
1	1_16974677_C_T	16974677	0	36	T	C	0.014	321853.0	80387.58	0.0003465485	0.0001315578	0.001525498
1	1_17085991_G_GC	17085991	0	36	GC	G	0.014	321853.0	80387.58	0.0003465485	0.0001315578	0.001525498
1	1_17263305_G_T	17263305	0	36	T	G	0.014	436664.2	61020.15	4.012093e-08	4.481637e-09	4.648295e-05
1	1_17275337_C_T	17275337	0	36	T	C	0.014	436664.2	61020.15	4.012093e-08	4.481637e-09	4.648295e-05
1	1_17371221_C_T	17371221	0	36	T	C	0.028	208174.8	61334.78	0.001851996	0.0008777182	0.004155191
1	1_17594456_C_T	17594456	0	36	T	C	0.014	436664.2	61020.15	4.012093e-08	4.481637e-09	4.648295e-05
1	1_17907108_T_G	17907108	0	36	G	T	0.014	436664.2	61020.15	4.012093e-08	4.481637e-09	4.648295e-05
1	1_17907468_G_A	17907468	0	36	A	G	0.028	223410.5	59629.74	0.0007095927	0.0002962867	0.002297936
1	1_18691614_T_C	18691614	0	36	C	T	0.069	156207.3	37475.76	0.0002178202	7.772566e-05	0.001186137
1	1_18691665_G_T	18691665	0	36	T	G	0.069	156207.3	37475.76	0.0002178202	7.772566e-05	0.001186137
1	1_18703544_G_A	18703544	0	36	A	G	0.069	156207.3	37475.76	0.0002178202	7.772566e-05	0.001186137
1	1_19246320_G_A	19246320	0	36	A	G	0.083	131741.3	38882.7	0.001881479	0.0008935448	0.004197793
1	1_19247509_G_A	19247509	0	36	A	G	0.083	131741.3	38882.7	0.001881479	0.0008935448	0.004197793
1	1_19581170_A_G	19581170	0	36	G	A	0.014	436664.2	61020.15	4.012093e-08	4.481637e-09	4.648295e-05
1	1_19585059_G_A	19585059	0	36	A	G	0.028	221561.8	58687.92	0.0006555987	0.0002708846	0.002193379
1	1_19654019_A_ATCCC	19654019	0	36	ATCCC	A	0.014	321853.0	80387.58	0.0003465485	0.0001315578	0.001525498
1	1_19654031_CT_C	19654031	0	36	C	CT	0.014	321853.0	80387.58	0.0003465485	0.0001315578	0.001525498
1	1_19746151_G_A	19746151	0	36	A	G	0.028	221575.6	58618.45	0.0006471075	0.0002669143	0.002176689
1	1_19811938_C_T	19811938	0	36	T	C	0.028	208186.3	61328.14	0.001849249	0.0008762456	0.004151214
1	1_19981523_C_T	19981523	0	36	T	C	0.014	436664.2	61020.15	4.012093e-08	4.481637e-09	4.648295e-05
1	1_20417038_C_T	20417038	0	36	T	C	0.014	436664.2	61020.15	4.012093e-08	4.481637e-09	4.648295e-05
1	1_20442878_C_T	20442878	0	36	T	C	0.014	436664.2	61020.15	4.012093e-08	4.481637e-09	4.648295e-05
1	1_20981908_G_A	20981908	0	36	A	G	0.014	321853.0	80387.58	0.0003465485	0.0001315578	0.001525498
1	1_21804620_C_T	21804620	0	36	T	C	0.014	436664.2	61020.15	4.012093e-08	4.481637e-09	4.648295e-05
1	1_21944439_C_T	21944439	0	36	T	C	0.014	436664.2	61020.15	4.012093e-08	4.481637e-09	4.648295e-05
1	1_21991760_C_T	21991760	0	36	T	C	0.014	436664.2	61020.15	4.012093e-08	4.481637e-09	4.648295e-05
1	1_22163253_G_A	22163253	0	36	A	G	0.014	436664.2	61020.15	4.012093e-08	4.481637e-09	4.648295e-05
1	1_22179156_C_A	22179156	0	36	A	C	0.014	436664.2	61020.15	4.012093e-08	4.481637e-09	4.648295e-05
1	1_22205673_G_A	22205673	0	36	A	G	0.014	436664.2	61020.15	4.012093e-08	4.481637e-09	4.648295e-05
1	1_22206977_C_T	22206977	0	36	T	C	0.014	436664.2	61020.15	4.012093e-08	4.481637e-09	4.648295e-05
1	1_22453619_C_T	22453619	0	36	T	C	0.069	122789.2	32356.81	0.000620963	0.0002547331	0.002124849
1	1_22852542_G_A	22852542	0	36	A	G	0.014	436664.2	61020.15	4.012093e-08	4.481637e-09	4.648295e-05
1	1_23209062_G_A	23209062	0	36	A	G	0.014	436664.2	61020.15	4.012093e-08	4.481637e-09	4.648295e-05
1	1_23520259_C_A	23520259	0	36	A	C	0.014	436664.2	61020.15	4.012093e-08	4.481637e-09	4.648295e-05
1	1_24663654_C_T	24663654	0	36	T	C	0.014	321853.0	80387.58	0.0003465485	0.0001315578	0.001525498
1	1_24857690_G_T	24857690	0	36	T	G	0.014	321853.0	80387.58	0.0003465485	0.0001315578	0.001525498
1	1_24981585_G_A	24981585	0	36	A	G	0.028	208179.4	61352.55	0.001856499	0.0008801335	0.00416171
1	1_26135696_G_A	26135696	0	36	A	G	0.028	208167.9	61239.19	0.001826468	0.0008640413	0.004118161
1	1_26392824_C_A	26392824	0	36	A	C	0.042	266532.0	34794.55	9.911143e-09	9.155907e-10	3.287662e-05
1	1_26504184_G_A	26504184	0	36	A	G	0.014	436664.2	61020.15	4.012093e-08	4.481637e-09	4.648295e-05
1	1_26520292_G_T	26520292	0	36	T	G	0.056	200309.8	40340.76	2.197071e-05	5.763451e-06	0.0003939248
1	1_26527884_G_A	26527884	0	36	A	G	0.056	200309.8	40340.76	2.197071e-05	5.763451e-06	0.0003939248
1	1_26566187_G_A	26566187	0	36	A	G	0.056	200309.8	40340.76	2.197071e-05	5.763451e-06	0.0003939248
1	1_26570805_G_T	26570805	0	36	T	G	0.014	321853.0	80387.58	0.0003465485	0.0001315578	0.001525498
1	1_26654937_G_C	26654937	0	36	C	G	0.861	-97954.58	27951.43	0.001376026	0.0006271249	0.003439324
1	1_26655304_C_G	26655304	0	36	G	C	0.014	436664.2	61020.15	4.012093e-08	4.481637e-09	4.648295e-05
1	1_26662774_C_T	26662774	0	36	T	C	0.847	-94200.6	27864.29	0.001919483	0.0009139929	0.004252451
1	1_26670752_C_T	26670752	0	36	T	C	0.111	130106.0	36644.02	0.001214396	0.0005444135	0.003181296
1	1_26671084_G_T	26671084	0	36	T	G	0.111	130106.0	36644.02	0.001214396	0.0005444135	0.003181296
1	1_26671248_A_G	26671248	0	36	G	A	0.111	130106.0	36644.02	0.001214396	0.0005444135	0.003181296
1	1_26673076_G_A	26673076	0	36	A	G	0.111	130106.0	36644.02	0.001214396	0.0005444135	0.003181296
1	1_26673108_C_T	26673108	0	36	T	C	0.111	130106.0	36644.02	0.001214396	0.0005444135	0.003181296
1	1_26691286_CCCACCGAGCGCTGGGGTGCCCCAG_C	26691286	0	36	C	CCCACCGAGCGCTGGGGTGCCCCAG	0.125	121651.4	35179.69	0.001559889	0.0007227674	0.003722759
1	1_26694059_G_C	26694059	0	36	C	G	0.111	114121.2	34010.0	0.002052893	0.0009861876	0.004442166
1	1_26699051_C_A	26699051	0	36	A	C	0.111	116762.2	33042.3	0.001271143	0.0005732979	0.003272936
1	1_26795299_T_C	26795299	0	36	C	T	0.042	267594.3	35617.99	1.486806e-08	1.451311e-09	3.621423e-05
1	1_27093098_A_G	27093098	0	36	G	A	0.014	321853.0	80387.58	0.0003465485	0.0001315578	0.001525498
1	1_27426796_T_C	27426796	0	36	C	T	0.972	-208179.4	61352.55	0.001856499	0.0008801335	0.00416171
1	1_27427041_T_C	27427041	0	36	C	T	0.972	-208179.4	61352.55	0.001856499	0.0008801335	0.00416171
1	1_28099724_G_T	28099724	0	36	T	G	0.014	321853.0	80387.58	0.0003465485	0.0001315578	0.001525498
1	1_28115993_G_C	28115993	0	36	C	G	0.028	208170.9	61319.67	0.001848169	0.0008756665	0.004149649
1	1_28477192_T_C	28477192	0	36	C	T	0.014	436664.2	61020.15	4.012093e-08	4.481637e-09	4.648295e-05
1	1_28586376_C_G	28586376	0	36	G	C	0.028	208170.9	61319.67	0.001848169	0.0008756665	0.004149649
1	1_28817368_C_A	28817368	0	36	A	C	0.014	321853.0	80387.58	0.0003465485	0.0001315578	0.001525498
1	1_29016714_T_TG	29016714	0	36	TG	T	0.014	436664.2	61020.15	4.012093e-08	4.481637e-09	4.648295e-05
1	1_29016715_GTTT_GT	29016715	0	36	GT	GTTT	0.014	321853.0	80387.58	0.0003465485	0.0001315578	0.001525498
1	1_29016718_T_G	29016718	0	36	G	T	0.014	321853.0	80387.58	0.0003465485	0.0001315578	0.001525498
1	1_29447425_G_A	29447425	0	36	A	G	0.014	321853.0	80387.58	0.0003465485	0.0001315578	0.001525498
1	1_29474934_G_C	29474934	0	36	C	G	0.014	321853.0	80387.58	0.0003465485	0.0001315578	0.001525498
1	1_29485782_A_C	29485782	0	36	C	A	0.014	321853.0	80387.58	0.0003465485	0.0001315578	0.001525498
1	1_29586595_C_T	29586595	0	36	T	C	0.014	436664.2	61020.15	4.012093e-08	4.481637e-09	4.648295e-05
1	1_29842282_TCTC_T	29842282	0	36	T	TCTC	0.028	208165.6	61339.7	0.001854095	0.0008788437	0.004158229
1	1_29842741_C_T	29842741	0	36	T	C	0.014	321853.0	80387.58	0.0003465485	0.0001315578	0.001525498
1	1_29843404_TTCC_T	29843404	0	36	T	TTCC	0.014	321853.0	80387.58	0.0003465485	0.0001315578	0.001525498
1	1_29845148_CTCT_C	29845148	0	36	C	CTCT	0.014	436664.2	61020.15	4.012093e-08	4.481637e-09	4.648295e-05
1	1_31230264_C_T	31230264	0	36	T	C	0.014	321853.0	80387.58	0.0003465485	0.0001315578	0.001525498
1	1_31406286_TACACACACACAC_TACACACACACACAC	31406286	0	36	TACACACACACACAC	TACACACACACAC	0.028	221560.9	58683.75	0.000655138	0.000270669	0.002192476
1	1_31440921_G_A	31440921	0	36	A	G	0.778	-83926.36	25747.93	0.00264792	0.001315224	0.005253972
1	1_31732618_AT_A	31732618	0	36	A	AT	0.028	221562.2	58701.93	0.0006572218	0.0002716443	0.002196562
1	1_31838573_C_A	31838573	0	36	A	C	0.028	231936.7	59560.94	0.0004711466	0.0001863175	0.001812379
1	1_31842320_T_C	31842320	0	36	C	T	0.056	209360.9	36683.56	2.537702e-06	4.974279e-07	0.0001671402
1	1_32052529_C_A	32052529	0	36	A	C	0.014	436664.2	61020.15	4.012093e-08	4.481637e-09	4.648295e-05
1	1_32158838_T_C	32158838	0	36	C	T	0.014	436664.2	61020.15	4.012093e-08	4.481637e-09	4.648295e-05
1	1_32158841_A_C	32158841	0	36	C	A	0.014	436664.2	61020.15	4.012093e-08	4.481637e-09	4.648295e-05
1	1_32158845_A_C	32158845	0	36	C	A	0.014	436664.2	61020.15	4.012093e-08	4.481637e-09	4.648295e-05
1	1_32230700_A_G	32230700	0	36	G	A	0.028	208174.9	61332.04	0.001851238	0.0008773119	0.004154094
1	1_32280783_A_T	32280783	0	36	T	A	0.014	436664.2	61020.15	4.012093e-08	4.481637e-09	4.648295e-05
1	1_32538655_G_A	32538655	0	36	A	G	0.014	436664.2	61020.15	4.012093e-08	4.481637e-09	4.648295e-05
1	1_32538782_G_A	32538782	0	36	A	G	0.083	159408.3	24589.94	2.703955e-07	3.913265e-08	7.952282e-05
1	1_32660265_GC_G	32660265	0	36	G	GC	0.014	436664.2	61020.15	4.012093e-08	4.481637e-09	4.648295e-05
1	1_32782428_T_C	32782428	0	36	C	T	0.014	436664.2	61020.15	4.012093e-08	4.481637e-09	4.648295e-05
1	1_33231458_G_A	33231458	0	36	A	G	0.014	436664.2	61020.15	4.012093e-08	4.481637e-09	4.648295e-05
1	1_33235789_C_T	33235789	0	36	T	C	0.028	208167.9	61239.19	0.001826468	0.0008640413	0.004118161
1	1_33361266_C_T	33361266	0	36	T	C	0.014	436664.2	61020.15	4.012093e-08	4.481637e-09	4.648295e-05
1	1_33557705_G_A	33557705	0	36	A	G	0.014	321853.0	80387.58	0.0003465485	0.0001315578	0.001525498
1	1_33585537_G_A	33585537	0	36	A	G	0.014	436664.2	61020.15	4.012093e-08	4.481637e-09	4.648295e-05
1	1_33954805_C_T	33954805	0	36	T	C	0.042	266929.6	37199.75	3.798805e-08	4.212022e-09	4.582594e-05
1	1_34068136_G_A	34068136	0	36	A	G	0.014	436664.2	61020.15	4.012093e-08	4.481637e-09	4.648295e-05
1	1_34190096_C_T	34190096	0	36	T	C	0.014	321853.0	80387.58	0.0003465485	0.0001315578	0.001525498
1	1_35451102_G_C	35451102	0	36	C	G	0.014	321853.0	80387.58	0.0003465485	0.0001315578	0.001525498
1	1_35477368_C_A	35477368	0	36	A	C	0.014	436664.2	61020.15	4.012093e-08	4.481637e-09	4.648295e-05
1	1_36181813_G_C	36181813	0	36	C	G	0.014	436664.2	61020.15	4.012093e-08	4.481637e-09	4.648295e-05
1	1_36235455_C_T	36235455	0	36	T	C	0.028	208170.5	61305.18	0.001844241	0.000873561	0.004143957
1	1_36367224_T_C	36367224	0	36	C	T	0.014	321853.0	80387.58	0.0003465485	0.0001315578	0.001525498
1	1_36432506_A_G	36432506	0	36	G	A	0.028	208170.5	61305.18	0.001844241	0.000873561	0.004143957
1	1_36552840_G_A	36552840	0	36	A	G	0.014	436664.2	61020.15	4.012093e-08	4.481637e-09	4.648295e-05
1	1_36747997_ATT_AT	36747997	0	36	AT	ATT	0.139	96290.06	27570.33	0.001421148	0.0006504504	0.003509804
1	1_36884528_AAG_A	36884528	0	36	A	AAG	0.028	208186.3	61328.14	0.001849249	0.0008762456	0.004151214
1	1_37319610_A_G	37319610	0	36	G	A	0.014	321853.0	80387.58	0.0003465485	0.0001315578	0.001525498
1	1_37335237_C_T	37335237	0	36	T	C	0.014	321853.0	80387.58	0.0003465485	0.0001315578	0.001525498
1	1_37941374_G_A	37941374	0	36	A	G	0.014	436664.2	61020.15	4.012093e-08	4.481637e-09	4.648295e-05
1	1_37947458_C_T	37947458	0	36	T	C	0.014	321853.0	80387.58	0.0003465485	0.0001315578	0.001525498
1	1_38033291_C_T	38033291	0	36	T	C	0.014	436664.2	61020.15	4.012093e-08	4.481637e-09	4.648295e-05
1	1_38155687_GT_GTT	38155687	0	36	GTT	GT	0.028	208167.9	61239.19	0.001826468	0.0008640413	0.004118161
1	1_38187158_C_G	38187158	0	36	G	C	0.028	208171.0	61320.19	0.001848308	0.0008757407	0.004149849
1	1_38304444_G_A	38304444	0	36	A	G	0.014	436664.2	61020.15	4.012093e-08	4.481637e-09	4.648295e-05
1	1_38304458_G_T	38304458	0	36	T	G	0.014	436664.2	61020.15	4.012093e-08	4.481637e-09	4.648295e-05
1	1_38304469_CTTTTT_TTTTTT	38304469	0	36	TTTTTT	CTTTTT	0.083	139609.7	38277.81	0.0009326541	0.0004037771	0.00270601
1	1_38397496_C_T	38397496	0	36	T	C	0.028	208165.6	61339.7	0.001854095	0.0008788437	0.004158229
1	1_39484714_T_G	39484714	0	36	G	T	0.014	321853.0	80387.58	0.0003465485	0.0001315578	0.001525498
1	1_39494666_CT_C	39494666	0	36	C	CT	0.028	247985.9	56789.25	0.0001237164	4.093123e-05	0.0008851058
1	1_39500160_C_T	39500160	0	36	T	C	0.014	436664.2	61020.15	4.012093e-08	4.481637e-09	4.648295e-05
1	1_39763362_C_G	39763362	0	36	G	C	0.014	436664.2	61020.15	4.012093e-08	4.481637e-09	4.648295e-05
1	1_39796945_A_G	39796945	0	36	G	A	0.014	436664.2	61020.15	4.012093e-08	4.481637e-09	4.648295e-05
1	1_39852860_C_T	39852860	0	36	T	C	0.014	321853.0	80387.58	0.0003465485	0.0001315578	0.001525498
1	1_40097141_T_C	40097141	0	36	C	T	0.014	321853.0	80387.58	0.0003465485	0.0001315578	0.001525498
1	1_40228655_CT_C	40228655	0	36	C	CT	0.014	321853.0	80387.58	0.0003465485	0.0001315578	0.001525498
1	1_40228662_G_A	40228662	0	36	A	G	0.014	321853.0	80387.58	0.0003465485	0.0001315578	0.001525498
1	1_40228663_C_T	40228663	0	36	T	C	0.014	321853.0	80387.58	0.0003465485	0.0001315578	0.001525498
1	1_40422703_C_A	40422703	0	36	A	C	0.014	436664.2	61020.15	4.012093e-08	4.481637e-09	4.648295e-05
1	1_40661474_T_C	40661474	0	36	C	T	0.014	436664.2	61020.15	4.012093e-08	4.481637e-09	4.648295e-05
1	1_40768238_G_A	40768238	0	36	A	G	0.014	321853.0	80387.58	0.0003465485	0.0001315578	0.001525498
1	1_40768483_TGGAGGGAG_TGGAGGGAGGGAG	40768483	0	36	TGGAGGGAGGGAG	TGGAGGGAG	0.014	321853.0	80387.58	0.0003465485	0.0001315578	0.001525498
1	1_40770456_A_T	40770456	0	36	T	A	0.014	321853.0	80387.58	0.0003465485	0.0001315578	0.001525498
1	1_40773175_G_C	40773175	0	36	C	G	0.014	321853.0	80387.58	0.0003465485	0.0001315578	0.001525498
1	1_40874411_G_A	40874411	0	36	A	G	0.014	436664.2	61020.15	4.012093e-08	4.481637e-09	4.648295e-05
1	1_40882753_A_G	40882753	0	36	G	A	0.042	174564.6	52887.15	0.00237489	0.001162901	0.00488775
1	1_40923133_C_T	40923133	0	36	T	C	0.014	321853.0	80387.58	0.0003465485	0.0001315578	0.001525498
1	1_41218957_A_T	41218957	0	36	T	A	0.014	436664.2	61020.15	4.012093e-08	4.481637e-09	4.648295e-05
1	1_41284100_A_C	41284100	0	36	C	A	0.014	436664.2	61020.15	4.012093e-08	4.481637e-09	4.648295e-05
1	1_41485902_C_G	41485902	0	36	G	C	0.264	79993.24	21483.6	0.0007564506	0.0003185397	0.002386637
1	1_42902142_T_C	42902142	0	36	C	T	0.028	208173.6	61339.8	0.001853476	0.0008785118	0.004157334
1	1_43217242_A_AT	43217242	0	36	AT	A	0.028	160926.5	40193.79	0.0003465485	0.0001315578	0.001525498
1	1_43773039_G_A	43773039	0	36	A	G	0.014	436664.2	61020.15	4.012093e-08	4.481637e-09	4.648295e-05
1	1_43890864_C_T	43890864	0	36	T	C	0.014	321853.0	80387.58	0.0003465485	0.0001315578	0.001525498
1	1_43895300_C_T	43895300	0	36	T	C	0.028	221561.8	58687.92	0.0006555987	0.0002708846	0.002193379
1	1_43905286_C_T	43905286	0	36	T	C	0.028	221553.1	58681.38	0.0006551038	0.000270653	0.002192408
1	1_44063417_A_C	44063417	0	36	C	A	0.028	208186.3	61328.14	0.001849249	0.0008762456	0.004151214
1	1_44084903_T_G	44084903	0	36	G	T	0.014	436664.2	61020.15	4.012093e-08	4.481637e-09	4.648295e-05
1	1_44084907_T_G	44084907	0	36	G	T	0.028	208157.4	61270.85	0.001835922	0.0008691033	0.00413189
1	1_44451122_G_T	44451122	0	36	T	G	0.014	436664.2	61020.15	4.012093e-08	4.481637e-09	4.648295e-05
1	1_44458368_A_G	44458368	0	36	G	A	0.014	321853.0	80387.58	0.0003465485	0.0001315578	0.001525498
1	1_44686594_G_T	44686594	0	36	T	G	0.014	321853.0	80387.58	0.0003465485	0.0001315578	0.001525498
1	1_45220566_C_A	45220566	0	36	A	C	0.014	436664.2	61020.15	4.012093e-08	4.481637e-09	4.648295e-05
1	1_45224901_G_A	45224901	0	36	A	G	0.014	321853.0	80387.58	0.0003465485	0.0001315578	0.001525498
1	1_45225220_C_T	45225220	0	36	T	C	0.014	321853.0	80387.58	0.0003465485	0.0001315578	0.001525498
1	1_45243858_A_C	45243858	0	36	C	A	0.014	436664.2	61020.15	4.012093e-08	4.481637e-09	4.648295e-05
1	1_45243957_A_G	45243957	0	36	G	A	0.014	321853.0	80387.58	0.0003465485	0.0001315578	0.001525498
1	1_45267258_G_A	45267258	0	36	A	G	0.014	321853.0	80387.58	0.0003465485	0.0001315578	0.001525498
1	1_45267698_G_C	45267698	0	36	C	G	0.014	321853.0	80387.58	0.0003465485	0.0001315578	0.001525498
1	1_45481173_G_A	45481173	0	36	A	G	0.014	321853.0	80387.58	0.0003465485	0.0001315578	0.001525498
1	1_45962900_AAAG_A	45962900	0	36	A	AAAG	0.014	436664.2	61020.15	4.012093e-08	4.481637e-09	4.648295e-05
1	1_45965212_G_A	45965212	0	36	A	G	0.014	436664.2	61020.15	4.012093e-08	4.481637e-09	4.648295e-05
1	1_46032311_A_G	46032311	0	36	G	A	0.014	321853.0	80387.58	0.0003465485	0.0001315578	0.001525498
1	1_46347889_T_G	46347889	0	36	G	T	0.028	208174.9	61332.04	0.001851238	0.0008773119	0.004154094
1	1_46501184_G_A	46501184	0	36	A	G	0.014	436664.2	61020.15	4.012093e-08	4.481637e-09	4.648295e-05
1	1_46810815_A_G	46810815	0	36	G	A	0.014	436664.2	61020.15	4.012093e-08	4.481637e-09	4.648295e-05
1	1_47099433_T_TC	47099433	0	36	TC	T	0.028	208174.9	61332.04	0.001851238	0.0008773119	0.004154094
1	1_47548189_A_G	47548189	0	36	G	A	0.014	436664.2	61020.15	4.012093e-08	4.481637e-09	4.648295e-05
1	1_47882165_GGGC_G	47882165	0	36	G	GGGC	0.028	208173.6	61339.8	0.001853476	0.0008785118	0.004157334
1	1_48688376_A_G	48688376	0	36	G	A	0.083	129669.7	38527.29	0.001998123	0.0009564726	0.004364676
1	1_48708250_C_T	48708250	0	36	T	C	0.083	129669.7	38527.29	0.001998123	0.0009564726	0.004364676
1	1_48708278_G_A	48708278	0	36	A	G	0.083	129669.7	38527.29	0.001998123	0.0009564726	0.004364676
1	1_48821318_C_CA	48821318	0	36	CA	C	0.069	156742.6	38835.43	0.0003164398	0.0001186825	0.001450981
1	1_48866555_A_G	48866555	0	36	G	A	0.069	156742.6	38835.43	0.0003164398	0.0001186825	0.001450981
1	1_49000699_C_T	49000699	0	36	T	C	0.014	321853.0	80387.58	0.0003465485	0.0001315578	0.001525498
1	1_51868160_C_G	51868160	0	36	G	C	0.014	321853.0	80387.58	0.0003465485	0.0001315578	0.001525498
1	1_52205806_T_G	52205806	0	36	G	T	0.014	436664.2	61020.15	4.012093e-08	4.481637e-09	4.648295e-05
1	1_52211190_C_G	52211190	0	36	G	C	0.028	208174.8	61334.78	0.001851996	0.0008777182	0.004155191
1	1_52211387_G_A	52211387	0	36	A	G	0.014	436664.2	61020.15	4.012093e-08	4.481637e-09	4.648295e-05
1	1_52218226_A_G	52218226	0	36	G	A	0.028	208174.8	61334.78	0.001851996	0.0008777182	0.004155191
1	1_52231560_C_T	52231560	0	36	T	C	0.028	208174.8	61334.78	0.001851996	0.0008777182	0.004155191
1	1_52249762_A_G	52249762	0	36	G	A	0.028	208174.8	61334.78	0.001851996	0.0008777182	0.004155191
1	1_52859499_T_C	52859499	0	36	C	T	0.028	208170.9	61319.67	0.001848169	0.0008756665	0.004149649
1	1_53535493_C_G	53535493	0	36	G	C	0.028	208170.9	61319.67	0.001848169	0.0008756665	0.004149649
1	1_53676535_G_A	53676535	0	36	A	G	0.014	321853.0	80387.58	0.0003465485	0.0001315578	0.001525498
1	1_53699093_C_T	53699093	0	36	T	C	0.014	436664.2	61020.15	4.012093e-08	4.481637e-09	4.648295e-05
1	1_54477765_A_G	54477765	0	36	G	A	0.014	436664.2	61020.15	4.012093e-08	4.481637e-09	4.648295e-05
1	1_54483792_G_T	54483792	0	36	T	G	0.056	147293.3	31375.18	4.817579e-05	1.404527e-05	0.0005605553
1	1_54683925_G_A	54683925	0	36	A	G	0.181	79602.46	24125.09	0.002381996	0.001166838	0.004897407
1	1_54692859_G_GGC	54692859	0	36	GGC	G	0.153	88861.13	24756.29	0.001092395	0.0004829216	0.002979969
1	1_54870330_A_T	54870330	0	36	T	A	0.014	436664.2	61020.15	4.012093e-08	4.481637e-09	4.648295e-05
1	1_55136341_C_A	55136341	0	36	A	C	0.014	321853.0	80387.58	0.0003465485	0.0001315578	0.001525498
1	1_55136349_CA_C	55136349	0	36	C	CA	0.028	208180.3	61358.86	0.001858164	0.0008810268	0.004164119
1	1_55138914_G_T	55138914	0	36	T	G	0.014	436664.2	61020.15	4.012093e-08	4.481637e-09	4.648295e-05
1	1_55271730_C_T	55271730	0	36	T	C	0.028	223410.5	59629.74	0.0007095927	0.0002962867	0.002297936
1	1_55277346_C_G	55277346	0	36	G	C	0.028	208171.0	61320.19	0.001848308	0.0008757407	0.004149849
1	1_55277446_G_GCCCCC	55277446	0	36	GCCCCC	G	0.014	321853.0	80387.58	0.0003465485	0.0001315578	0.001525498
1	1_55280791_G_A	55280791	0	36	A	G	0.028	208171.0	61320.19	0.001848308	0.0008757407	0.004149849
1	1_55352391_G_C	55352391	0	36	C	G	0.014	321853.0	80387.58	0.0003465485	0.0001315578	0.001525498
1	1_56197779_C_G	56197779	0	36	G	C	0.014	321853.0	80387.58	0.0003465485	0.0001315578	0.001525498
1	1_57258598_C_T	57258598	0	36	T	C	0.028	208170.9	61319.67	0.001848169	0.0008756665	0.004149649
1	1_57320487_C_G	57320487	0	36	G	C	0.028	208171.6	61328.22	0.001850456	0.0008768922	0.004152961
1	1_57333311_C_A	57333311	0	36	A	C	0.028	208171.6	61328.22	0.001850456	0.0008768922	0.004152961
1	1_57347244_C_G	57347244	0	36	G	C	0.028	208171.6	61328.22	0.001850456	0.0008768922	0.004152961
1	1_57399250_C_T	57399250	0	36	T	C	0.014	436664.2	61020.15	4.012093e-08	4.481637e-09	4.648295e-05
1	1_58971748_T_A	58971748	0	36	A	T	0.014	436664.2	61020.15	4.012093e-08	4.481637e-09	4.648295e-05
1	1_58999978_A_G	58999978	0	36	G	A	0.014	436664.2	61020.15	4.012093e-08	4.481637e-09	4.648295e-05
1	1_60373654_T_C	60373654	0	36	C	T	0.014	321853.0	80387.58	0.0003465485	0.0001315578	0.001525498
1	1_60375389_G_T	60375389	0	36	T	G	0.014	436664.2	61020.15	4.012093e-08	4.481637e-09	4.648295e-05
1	1_60505783_G_C	60505783	0	36	C	G	0.181	90243.94	20853.39	0.0001384004	4.648178e-05	0.0009369118
1	1_60505965_T_G	60505965	0	36	G	T	0.208	72953.35	20443.06	0.001156155	0.0005149524	0.003085957
1	1_60506744_G_A	60506744	0	36	A	G	0.181	90243.94	20853.39	0.0001384004	4.648178e-05	0.0009369118
1	1_61872231_CAG_C	61872231	0	36	C	CAG	0.014	436664.2	61020.15	4.012093e-08	4.481637e-09	4.648295e-05
1	1_62175038_C_T	62175038	0	36	T	C	0.014	321853.0	80387.58	0.0003465485	0.0001315578	0.001525498
1	1_62231956_C_A	62231956	0	36	A	C	0.014	321853.0	80387.58	0.0003465485	0.0001315578	0.001525498
1	1_63153964_G_C	63153964	0	36	C	G	0.014	436664.2	61020.15	4.012093e-08	4.481637e-09	4.648295e-05
1	1_63300877_T_A	63300877	0	36	A	T	0.069	156721.5	37389.8	0.0002038638	7.210526e-05	0.001145299
1	1_64011657_A_G	64011657	0	36	G	A	0.014	321853.0	80387.58	0.0003465485	0.0001315578	0.001525498
1	1_64936679_C_G	64936679	0	36	G	C	0.014	321853.0	80387.58	0.0003465485	0.0001315578	0.001525498
1	1_65301669_C_A	65301669	0	36	A	C	0.347	92486.05	25898.9	0.001148535	0.0005111119	0.003073381
1	1_65306842_T_G	65306842	0	36	G	T	0.014	321853.0	80387.58	0.0003465485	0.0001315578	0.001525498
1	1_65310489_T_C	65310489	0	36	C	T	0.194	119942.8	36120.1	0.002252365	0.001095266	0.004720094
1	1_65311116_G_C	65311116	0	36	C	G	0.194	119942.8	36120.1	0.002252365	0.001095266	0.004720094
1	1_65311117_C_T	65311117	0	36	T	C	0.181	149219.1	38304.18	0.0004691423	0.0001854198	0.00180799
1	1_66058439_G_A	66058439	0	36	A	G	0.014	321853.0	80387.58	0.0003465485	0.0001315578	0.001525498
1	1_67313091_T_TC	67313091	0	36	TC	T	0.014	436664.2	61020.15	4.012093e-08	4.481637e-09	4.648295e-05
1	1_67327789_GT_G	67327789	0	36	G	GT	0.014	436664.2	61020.15	4.012093e-08	4.481637e-09	4.648295e-05
1	1_67487399_CAGACACAG_CACACAG	67487399	0	36	CACACAG	CAGACACAG	0.028	208157.4	61270.85	0.001835922	0.0008691033	0.00413189
1	1_67519482_C_A	67519482	0	36	A	C	0.014	321853.0	80387.58	0.0003465485	0.0001315578	0.001525498
1	1_67635297_T_G	67635297	0	36	G	T	0.014	321853.0	80387.58	0.0003465485	0.0001315578	0.001525498
1	1_68952780_T_C	68952780	0	36	C	T	0.014	436664.2	61020.15	4.012093e-08	4.481637e-09	4.648295e-05
1	1_70034432_T_G	70034432	0	36	G	T	0.014	321853.0	80387.58	0.0003465485	0.0001315578	0.001525498
1	1_70034440_C_G	70034440	0	36	G	C	0.014	321853.0	80387.58	0.0003465485	0.0001315578	0.001525498
1	1_70304018_A_C	70304018	0	36	C	A	0.014	436664.2	61020.15	4.012093e-08	4.481637e-09	4.648295e-05
1	1_70460347_T_A	70460347	0	36	A	T	0.014	321853.0	80387.58	0.0003465485	0.0001315578	0.001525498
1	1_70505191_G_A	70505191	0	36	A	G	0.014	321853.0	80387.58	0.0003465485	0.0001315578	0.001525498
1	1_71418661_TG_T	71418661	0	36	T	TG	0.014	321853.0	80387.58	0.0003465485	0.0001315578	0.001525498
1	1_71512178_G_T	71512178	0	36	T	G	0.014	321853.0	80387.58	0.0003465485	0.0001315578	0.001525498
1	1_72747962_T_G	72747962	0	36	G	T	0.014	436664.2	61020.15	4.012093e-08	4.481637e-09	4.648295e-05
1	1_74492720_G_A	74492720	0	36	A	G	0.014	321853.0	80387.58	0.0003465485	0.0001315578	0.001525498
1	1_75175714_A_G	75175714	0	36	G	A	0.042	212555.7	52494.49	0.0003050339	0.0001138464	0.001422091
1	1_75175797_G_A	75175797	0	36	A	G	0.042	212555.7	52494.49	0.0003050339	0.0001138464	0.001422091
1	1_75176017_T_C	75176017	0	36	C	T	0.042	212555.7	52494.49	0.0003050339	0.0001138464	0.001422091
1	1_75217990_A_T	75217990	0	36	T	A	0.042	212555.7	52494.49	0.0003050339	0.0001138464	0.001422091
1	1_75622887_G_C	75622887	0	36	C	G	0.014	436664.2	61020.15	4.012093e-08	4.481637e-09	4.648295e-05
1	1_76262523_G_A	76262523	0	36	A	G	0.083	133047.4	37344.47	0.001174883	0.0005244051	0.003116762
1	1_77588131_T_C	77588131	0	36	C	T	0.194	90810.41	25033.45	0.0009843684	0.0004292182	0.002796131
1	1_77672452_T_C	77672452	0	36	C	T	0.014	436664.2	61020.15	4.012093e-08	4.481637e-09	4.648295e-05
1	1_77779605_T_C	77779605	0	36	C	T	0.014	321853.0	80387.58	0.0003465485	0.0001315578	0.001525498
1	1_79094593_A_G	79094593	0	36	G	A	0.986	-436664.2	61020.15	4.012093e-08	4.481637e-09	4.648295e-05
1	1_79115967_G_GT	79115967	0	36	GT	G	0.014	436664.2	61020.15	4.012093e-08	4.481637e-09	4.648295e-05
1	1_79115968_G_GTCCATGGATTCC	79115968	0	36	GTCCATGGATTCC	G	0.014	436664.2	61020.15	4.012093e-08	4.481637e-09	4.648295e-05
1	1_82436294_C_G	82436294	0	36	G	C	0.014	436664.2	61020.15	4.012093e-08	4.481637e-09	4.648295e-05
1	1_84403547_C_T	84403547	0	36	T	C	0.014	436664.2	61020.15	4.012093e-08	4.481637e-09	4.648295e-05
1	1_85036500_A_G	85036500	0	36	G	A	0.014	321853.0	80387.58	0.0003465485	0.0001315578	0.001525498
1	1_85121097_A_G	85121097	0	36	G	A	0.014	321853.0	80387.58	0.0003465485	0.0001315578	0.001525498
1	1_85666579_G_A	85666579	0	36	A	G	0.014	436664.2	61020.15	4.012093e-08	4.481637e-09	4.648295e-05
1	1_86822433_T_G	86822433	0	36	G	T	0.014	436664.2	61020.15	4.012093e-08	4.481637e-09	4.648295e-05
1	1_86904954_T_G	86904954	0	36	G	T	0.014	436664.2	61020.15	4.012093e-08	4.481637e-09	4.648295e-05
1	1_86907262_G_A	86907262	0	36	A	G	0.028	229399.0	59570.43	0.0005314595	0.000213559	0.00194166
1	1_87100146_A_T	87100146	0	36	T	A	0.028	208167.9	61239.19	0.001826468	0.0008640413	0.004118161
1	1_87189923_T_C	87189923	0	36	C	T	0.028	208167.9	61239.19	0.001826468	0.0008640413	0.004118161
1	1_87369131_C_A	87369131	0	36	A	C	0.028	221560.8	58687.11	0.0006555339	0.0002708543	0.002193252
1	1_87797957_G_C	87797957	0	36	C	G	0.028	208174.0	61337.64	0.001852848	0.0008781754	0.004156425
1	1_89525214_CTTTTCT_TTTTTCT	89525214	0	36	TTTTTCT	CTTTTCT	0.028	208170.5	61305.18	0.001844241	0.000873561	0.004143957
1	1_89728437_G_A	89728437	0	36	A	G	0.014	321853.0	80387.58	0.0003465485	0.0001315578	0.001525498
1	1_89848275_CTGTTCA_C	89848275	0	36	C	CTGTTCA	0.014	436664.2	61020.15	4.012093e-08	4.481637e-09	4.648295e-05
1	1_92457746_T_G	92457746	0	36	G	T	0.014	436664.2	61020.15	4.012093e-08	4.481637e-09	4.648295e-05
1	1_92528502_T_C	92528502	0	36	C	T	0.014	436664.2	61020.15	4.012093e-08	4.481637e-09	4.648295e-05
1	1_92573404_T_A	92573404	0	36	A	T	0.014	436664.2	61020.15	4.012093e-08	4.481637e-09	4.648295e-05
1	1_92649312_G_GTT	92649312	0	36	GTT	G	0.014	321853.0	80387.58	0.0003465485	0.0001315578	0.001525498
1	1_93129067_T_A	93129067	0	36	A	T	0.014	321853.0	80387.58	0.0003465485	0.0001315578	0.001525498
1	1_93301670_G_T	93301670	0	36	T	G	0.014	436664.2	61020.15	4.012093e-08	4.481637e-09	4.648295e-05
1	1_93306300_C_T	93306300	0	36	T	C	0.014	321853.0	80387.58	0.0003465485	0.0001315578	0.001525498
1	1_94337515_T_C	94337515	0	36	C	T	0.028	225828.7	59591.41	0.0006300296	0.0002589499	0.002142905
1	1_94344607_G_C	94344607	0	36	C	G	0.028	225828.7	59591.41	0.0006300296	0.0002589499	0.002142905
1	1_94370216_A_G	94370216	0	36	G	A	0.028	225828.7	59591.41	0.0006300296	0.0002589499	0.002142905
1	1_96912659_A_G	96912659	0	36	G	A	0.167	111114.3	19786.56	3.31175e-06	6.72953e-07	0.0001842781
1	1_97187243_G_C	97187243	0	36	C	G	0.014	436664.2	61020.15	4.012093e-08	4.481637e-09	4.648295e-05
1	1_97189091_G_A	97189091	0	36	A	G	0.667	-70190.95	21126.81	0.002242241	0.001089699	0.004706142
1	1_97278804_G_A	97278804	0	36	A	G	0.667	-70190.95	21126.81	0.002242241	0.001089699	0.004706142
1	1_100571499_CTG_C	100571499	0	36	C	CTG	0.014	321853.0	80387.58	0.0003465485	0.0001315578	0.001525498
1	1_100576113_CA_C	100576113	0	36	C	CA	0.014	321853.0	80387.58	0.0003465485	0.0001315578	0.001525498
1	1_101438051_A_G	101438051	0	36	G	A	0.069	156577.8	38790.37	0.0003160498	0.0001185167	0.001449999
1	1_103379977_G_A	103379977	0	36	A	G	0.014	436664.2	61020.15	4.012093e-08	4.481637e-09	4.648295e-05
1	1_104163350_T_A	104163350	0	36	A	T	0.014	436664.2	61020.15	4.012093e-08	4.481637e-09	4.648295e-05
1	1_108003101_G_A	108003101	0	36	A	G	0.014	436664.2	61020.15	4.012093e-08	4.481637e-09	4.648295e-05
1	1_108507209_G_A	108507209	0	36	A	G	0.028	208227.3	61337.8	0.001848587	0.0008758902	0.004150253
1	1_108735266_C_A	108735266	0	36	A	C	0.014	321853.0	80387.58	0.0003465485	0.0001315578	0.001525498
1	1_109170836_G_A	109170836	0	36	A	G	0.014	321853.0	80387.58	0.0003465485	0.0001315578	0.001525498
1	1_109482222_C_T	109482222	0	36	T	C	0.028	221561.8	58687.92	0.0006555987	0.0002708846	0.002193379
1	1_109535450_C_T	109535450	0	36	T	C	0.069	162781.2	36288.63	8.795928e-05	2.78014e-05	0.0007470456
1	1_109656106_T_G	109656106	0	36	G	T	0.042	266570.2	34800.7	9.918088e-09	9.163194e-10	3.288202e-05
1	1_109756771_G_A	109756771	0	36	A	G	0.014	436664.2	61020.15	4.012093e-08	4.481637e-09	4.648295e-05
1	1_109801345_C_T	109801345	0	36	T	C	0.014	321853.0	80387.58	0.0003465485	0.0001315578	0.001525498
1	1_109856877_C_G	109856877	0	36	G	C	0.014	436664.2	61020.15	4.012093e-08	4.481637e-09	4.648295e-05
1	1_109912051_A_G	109912051	0	36	G	A	0.069	160488.8	40765.87	0.0004180998	0.0001627348	0.001693936
1	1_110009802_G_A	110009802	0	36	A	G	0.069	160488.8	40765.87	0.0004180998	0.0001627348	0.001693936
1	1_110148694_G_A	110148694	0	36	A	G	0.014	321853.0	80387.58	0.0003465485	0.0001315578	0.001525498
1	1_110162995_A_G	110162995	0	36	G	A	0.014	321853.0	80387.58	0.0003465485	0.0001315578	0.001525498
1	1_110210818_C_T	110210818	0	36	T	C	0.319	74311.04	22542.59	0.002401636	0.001177727	0.004924061
1	1_110882536_A_G	110882536	0	36	G	A	0.014	436664.2	61020.15	4.012093e-08	4.481637e-09	4.648295e-05
1	1_111060669_T_C	111060669	0	36	C	T	0.639	-78346.13	20560.66	0.0005946074	0.0002425219	0.002071866
1	1_111061062_T_C	111061062	0	36	C	T	0.639	-78346.13	20560.66	0.0005946074	0.0002425219	0.002071866
1	1_111717484_T_C	111717484	0	36	C	T	0.014	321853.0	80387.58	0.0003465485	0.0001315578	0.001525498
1	1_111854207_T_C	111854207	0	36	C	T	0.722	-90982.8	23922.62	0.0006067296	0.0002481297	0.002096328
1	1_111857107_A_G	111857107	0	36	G	A	0.097	124428.4	37869.63	0.002471074	0.001216315	0.005017873
1	1_111857120_C_A	111857120	0	36	A	C	0.097	124428.4	37869.63	0.002471074	0.001216315	0.005017873
1	1_111857208_G_A	111857208	0	36	A	G	0.097	124428.4	37869.63	0.002471074	0.001216315	0.005017873
1	1_111861475_A_G	111861475	0	36	G	A	0.097	124428.4	37869.63	0.002471074	0.001216315	0.005017873
1	1_111862074_C_T	111862074	0	36	T	C	0.097	124428.4	37869.63	0.002471074	0.001216315	0.005017873
1	1_111863306_C_T	111863306	0	36	T	C	0.111	118870.6	36160.68	0.002460747	0.001210567	0.005003962
1	1_111893794_T_TTG	111893794	0	36	TTG	T	0.014	436664.2	61020.15	4.012093e-08	4.481637e-09	4.648295e-05
1	1_112020229_A_C	112020229	0	36	C	A	0.014	321853.0	80387.58	0.0003465485	0.0001315578	0.001525498
1	1_112020237_G_C	112020237	0	36	C	G	0.014	321853.0	80387.58	0.0003465485	0.0001315578	0.001525498
1	1_112020241_AC_A	112020241	0	36	A	AC	0.014	321853.0	80387.58	0.0003465485	0.0001315578	0.001525498
1	1_112020246_T_C	112020246	0	36	C	T	0.014	321853.0	80387.58	0.0003465485	0.0001315578	0.001525498
1	1_112020249_T_C	112020249	0	36	C	T	0.014	321853.0	80387.58	0.0003465485	0.0001315578	0.001525498
1	1_112998505_A_G	112998505	0	36	G	A	0.014	436664.2	61020.15	4.012093e-08	4.481637e-09	4.648295e-05
1	1_113162494_G_A	113162494	0	36	A	G	0.014	436664.2	61020.15	4.012093e-08	4.481637e-09	4.648295e-05
1	1_113245535_T_C	113245535	0	36	C	T	0.014	436664.2	61020.15	4.012093e-08	4.481637e-09	4.648295e-05
1	1_114092131_C_T	114092131	0	36	T	C	0.014	321853.0	80387.58	0.0003465485	0.0001315578	0.001525498
1	1_115399779_G_A	115399779	0	36	A	G	0.056	197150.2	38337.08	1.312755e-05	3.212801e-06	0.0003164915
1	1_115399781_G_A	115399781	0	36	A	G	0.083	129448.3	38454.65	0.001994918	0.0009547373	0.004360126
1	1_115399788_GA_AA	115399788	0	36	AA	GA	0.069	156539.8	38779.14	0.0003158798	0.0001184445	0.001449571
1	1_115416989_G_A	115416989	0	36	A	G	0.069	127350.7	31596.8	0.0003214496	0.000120814	0.001463551
1	1_116940499_C_T	116940499	0	36	T	C	0.014	321853.0	80387.58	0.0003465485	0.0001315578	0.001525498
1	1_117214342_G_T	117214342	0	36	T	G	0.014	436664.2	61020.15	4.012093e-08	4.481637e-09	4.648295e-05
1	1_117554046_A_G	117554046	0	36	G	A	0.028	221562.4	58684.8	0.0006552156	0.0002707054	0.002192628
1	1_117655093_G_A	117655093	0	36	A	G	0.083	127927.4	37416.57	0.001732308	0.0008138116	0.003980378
1	1_117658290_C_T	117658290	0	36	T	C	0.014	436664.2	61020.15	4.012093e-08	4.481637e-09	4.648295e-05
1	1_117696106_A_T	117696106	0	36	T	A	0.014	321853.0	80387.58	0.0003465485	0.0001315578	0.001525498
1	1_117753543_G_A	117753543	0	36	A	G	0.042	267233.3	37225.58	3.765168e-08	4.169688e-09	4.572012e-05
1	1_118320792_G_A	118320792	0	36	A	G	0.042	168213.1	51670.41	0.002676259	0.001331155	0.005291449
1	1_118501407_G_T	118501407	0	36	T	G	0.056	197381.4	38391.2	1.317448e-05	3.225838e-06	0.0003169615
1	1_118524040_T_G	118524040	0	36	G	T	0.014	321853.0	80387.58	0.0003465485	0.0001315578	0.001525498
1	1_118535192_G_A	118535192	0	36	A	G	0.014	321853.0	80387.58	0.0003465485	0.0001315578	0.001525498
1	1_118535211_T_C	118535211	0	36	C	T	0.028	208170.5	61305.18	0.001844241	0.000873561	0.004143957
1	1_120267287_T_A	120267287	0	36	A	T	0.028	208171.0	61320.19	0.001848308	0.0008757407	0.004149849
1	1_120269549_G_A	120269549	0	36	A	G	0.028	208171.0	61320.19	0.001848308	0.0008757407	0.004149849
1	1_120341256_G_A	120341256	0	36	A	G	0.014	321853.0	80387.58	0.0003465485	0.0001315578	0.001525498
1	1_120345596_G_A	120345596	0	36	A	G	0.014	436664.2	61020.15	4.012093e-08	4.481637e-09	4.648295e-05
1	1_120384066_C_T	120384066	0	36	T	C	0.014	436664.2	61020.15	4.012093e-08	4.481637e-09	4.648295e-05
1	1_120466131_A_G	120466131	0	36	G	A	0.014	436664.2	61020.15	4.012093e-08	4.481637e-09	4.648295e-05
1	1_142826292_A_C	142826292	0	36	C	A	0.014	436664.2	61020.15	4.012093e-08	4.481637e-09	4.648295e-05
1	1_144164906_C_A	144164906	0	36	A	C	0.014	436664.2	61020.15	4.012093e-08	4.481637e-09	4.648295e-05
1	1_144164971_C_CTG	144164971	0	36	CTG	C	0.028	218332.1	30510.07	4.012093e-08	4.481637e-09	4.648295e-05
1	1_144814555_A_C	144814555	0	36	C	A	0.014	321853.0	80387.58	0.0003465485	0.0001315578	0.001525498
1	1_144859816_TGGA_T	144859816	0	36	T	TGGA	0.014	321853.0	80387.58	0.0003465485	0.0001315578	0.001525498
1	1_144863408_A_C	144863408	0	36	C	A	0.014	321853.0	80387.58	0.0003465485	0.0001315578	0.001525498
1	1_144863592_T_G	144863592	0	36	G	T	0.028	223410.5	59629.74	0.0007095927	0.0002962867	0.002297936
1	1_144952082_T_A	144952082	0	36	A	T	0.014	321853.0	80387.58	0.0003465485	0.0001315578	0.001525498
1	1_145039493_G_T	145039493	0	36	T	G	0.014	436664.2	61020.15	4.012093e-08	4.481637e-09	4.648295e-05
1	1_145075040_C_A	145075040	0	36	A	C	0.014	321853.0	80387.58	0.0003465485	0.0001315578	0.001525498
1	1_145209053_C_T	145209053	0	36	T	C	0.014	436664.2	61020.15	4.012093e-08	4.481637e-09	4.648295e-05
1	1_145209538_G_A	145209538	0	36	A	G	0.014	436664.2	61020.15	4.012093e-08	4.481637e-09	4.648295e-05
1	1_145281952_T_C	145281952	0	36	C	T	0.014	436664.2	61020.15	4.012093e-08	4.481637e-09	4.648295e-05
1	1_145295543_G_T	145295543	0	36	T	G	0.014	436664.2	61020.15	4.012093e-08	4.481637e-09	4.648295e-05
1	1_145296403_C_T	145296403	0	36	T	C	0.028	208180.3	61358.86	0.001858164	0.0008810268	0.004164119
1	1_145298281_T_C	145298281	0	36	C	T	0.028	208227.3	61337.8	0.001848587	0.0008758902	0.004150253
1	1_145299908_C_T	145299908	0	36	T	C	0.014	436664.2	61020.15	4.012093e-08	4.481637e-09	4.648295e-05
1	1_145301716_T_A	145301716	0	36	A	T	0.014	436664.2	61020.15	4.012093e-08	4.481637e-09	4.648295e-05
1	1_145361688_C_T	145361688	0	36	T	C	0.028	223410.5	59629.74	0.0007095927	0.0002962867	0.002297936
1	1_145365431_G_A	145365431	0	36	A	G	0.014	321853.0	80387.58	0.0003465485	0.0001315578	0.001525498
1	1_145366501_C_A	145366501	0	36	A	C	0.014	436664.2	61020.15	4.012093e-08	4.481637e-09	4.648295e-05
1	1_145367561_G_A	145367561	0	36	A	G	0.028	208180.3	61358.86	0.001858164	0.0008810268	0.004164119
1	1_145555699_G_A	145555699	0	36	A	G	0.028	208186.3	61328.14	0.001849249	0.0008762456	0.004151214
1	1_146055552_C_A	146055552	0	36	A	C	0.014	436664.2	61020.15	4.012093e-08	4.481637e-09	4.648295e-05
1	1_146218842_T_A	146218842	0	36	A	T	0.139	77084.61	23590.46	0.002592059	0.001283886	0.005179817
1	1_146399387_T_C	146399387	0	36	C	T	0.028	218158.8	59752.88	0.0009231345	0.0003991138	0.002689258
1	1_146399424_G_A	146399424	0	36	A	G	0.028	218158.8	59752.88	0.0009231345	0.0003991138	0.002689258
1	1_146420088_A_G	146420088	0	36	G	A	0.028	160926.5	40193.79	0.0003465485	0.0001315578	0.001525498
1	1_146673178_A_G	146673178	0	36	G	A	0.986	-436664.2	61020.15	4.012093e-08	4.481637e-09	4.648295e-05
1	1_146687250_A_T	146687250	0	36	T	A	0.986	-436664.2	61020.15	4.012093e-08	4.481637e-09	4.648295e-05
1	1_146724093_A_G	146724093	0	36	G	A	0.986	-436664.2	61020.15	4.012093e-08	4.481637e-09	4.648295e-05
1	1_146728162_T_TA	146728162	0	36	TA	T	0.986	-436664.2	61020.15	4.012093e-08	4.481637e-09	4.648295e-05
1	1_146751782_A_C	146751782	0	36	C	A	0.986	-436664.2	61020.15	4.012093e-08	4.481637e-09	4.648295e-05
1	1_146766069_C_CAT	146766069	0	36	CAT	C	0.986	-436664.2	61020.15	4.012093e-08	4.481637e-09	4.648295e-05
1	1_146767149_G_T	146767149	0	36	T	G	0.986	-436664.2	61020.15	4.012093e-08	4.481637e-09	4.648295e-05
1	1_148004525_C_T	148004525	0	36	T	C	0.111	115602.9	33944.47	0.001795479	0.000847472	0.004073026
1	1_148741574_C_T	148741574	0	36	T	C	0.014	321853.0	80387.58	0.0003465485	0.0001315578	0.001525498
1	1_148873415_AC_A	148873415	0	36	A	AC	0.014	321853.0	80387.58	0.0003465485	0.0001315578	0.001525498
1	1_149290991_A_G	149290991	0	36	G	A	0.014	321853.0	80387.58	0.0003465485	0.0001315578	0.001525498
1	1_149291003_C_T	149291003	0	36	T	C	0.083	131493.1	36324.44	0.001005041	0.0004394379	0.002831757
1	1_149764332_G_C	149764332	0	36	C	G	0.014	436664.2	61020.15	4.012093e-08	4.481637e-09	4.648295e-05
1	1_149764681_G_C	149764681	0	36	C	G	0.014	436664.2	61020.15	4.012093e-08	4.481637e-09	4.648295e-05
1	1_149785255_G_A	149785255	0	36	A	G	0.014	321853.0	80387.58	0.0003465485	0.0001315578	0.001525498
1	1_149822077_G_A	149822077	0	36	A	G	0.014	321853.0	80387.58	0.0003465485	0.0001315578	0.001525498
1	1_149876644_G_A	149876644	0	36	A	G	0.014	436664.2	61020.15	4.012093e-08	4.481637e-09	4.648295e-05
1	1_150259350_A_C	150259350	0	36	C	A	0.014	436664.2	61020.15	4.012093e-08	4.481637e-09	4.648295e-05
1	1_150281111_CA_C	150281111	0	36	C	CA	0.028	208165.6	61339.7	0.001854095	0.0008788437	0.004158229
1	1_150459987_C_T	150459987	0	36	T	C	0.014	321853.0	80387.58	0.0003465485	0.0001315578	0.001525498
1	1_150524619_T_C	150524619	0	36	C	T	0.014	321853.0	80387.58	0.0003465485	0.0001315578	0.001525498
1	1_150526631_G_C	150526631	0	36	C	G	0.028	208227.3	61337.8	0.001848587	0.0008758902	0.004150253
1	1_150599064_G_A	150599064	0	36	A	G	0.028	208227.3	61337.8	0.001848587	0.0008758902	0.004150253
1	1_150776797_T_C	150776797	0	36	C	T	0.014	436664.2	61020.15	4.012093e-08	4.481637e-09	4.648295e-05
1	1_150815054_GA_G	150815054	0	36	G	GA	0.083	129389.3	38436.68	0.00199471	0.0009546247	0.00435983
1	1_150849098_C_T	150849098	0	36	T	C	0.014	321853.0	80387.58	0.0003465485	0.0001315578	0.001525498
1	1_150932973_C_A	150932973	0	36	A	C	0.028	208170.5	61305.18	0.001844241	0.000873561	0.004143957
1	1_151083621_G_A	151083621	0	36	A	G	0.014	321853.0	80387.58	0.0003465485	0.0001315578	0.001525498
1	1_151083657_CT_C	151083657	0	36	C	CT	0.014	321853.0	80387.58	0.0003465485	0.0001315578	0.001525498
1	1_151105616_G_A	151105616	0	36	A	G	0.014	321853.0	80387.58	0.0003465485	0.0001315578	0.001525498
1	1_151112730_A_G	151112730	0	36	G	A	0.028	221562.4	58684.8	0.0006552156	0.0002707054	0.002192628
1	1_151142530_C_T	151142530	0	36	T	C	0.014	321853.0	80387.58	0.0003465485	0.0001315578	0.001525498
1	1_151341570_C_T	151341570	0	36	T	C	0.014	321853.0	80387.58	0.0003465485	0.0001315578	0.001525498
1	1_151380500_AAAAAAAAG_A	151380500	0	36	A	AAAAAAAAG	0.014	321853.0	80387.58	0.0003465485	0.0001315578	0.001525498
1	1_151546931_A_G	151546931	0	36	G	A	0.889	-112905.2	33887.63	0.002186985	0.00105937	0.004629708
1	1_151634638_C_T	151634638	0	36	T	C	0.014	321853.0	80387.58	0.0003465485	0.0001315578	0.001525498
1	1_151682503_G_A	151682503	0	36	A	G	0.069	132153.6	32150.84	0.000256553	9.3568e-05	0.001294587
1	1_151739333_C_T	151739333	0	36	T	C	0.014	436664.2	61020.15	4.012093e-08	4.481637e-09	4.648295e-05
1	1_151779889_G_A	151779889	0	36	A	G	0.014	321853.0	80387.58	0.0003465485	0.0001315578	0.001525498
1	1_152060564_G_C	152060564	0	36	C	G	0.014	321853.0	80387.58	0.0003465485	0.0001315578	0.001525498
1	1_152081247_C_T	152081247	0	36	T	C	0.014	436664.2	61020.15	4.012093e-08	4.481637e-09	4.648295e-05
1	1_152084027_TCTC_T	152084027	0	36	T	TCTC	0.014	436664.2	61020.15	4.012093e-08	4.481637e-09	4.648295e-05
1	1_152188062_T_C	152188062	0	36	C	T	0.028	221559.7	58704.62	0.0006576145	0.0002718282	0.002197331
1	1_152278809_G_A	152278809	0	36	A	G	0.028	229399.0	59570.43	0.0005314595	0.000213559	0.00194166
1	1_152279642_G_C	152279642	0	36	C	G	0.028	208170.9	61319.67	0.001848169	0.0008756665	0.004149649
1	1_152284948_G_A	152284948	0	36	A	G	0.014	321853.0	80387.58	0.0003465485	0.0001315578	0.001525498
1	1_152286127_C_T	152286127	0	36	T	C	0.014	321853.0	80387.58	0.0003465485	0.0001315578	0.001525498
1	1_152286834_G_T	152286834	0	36	T	G	0.014	321853.0	80387.58	0.0003465485	0.0001315578	0.001525498
1	1_152488146_G_A	152488146	0	36	A	G	0.028	208174.9	61332.04	0.001851238	0.0008773119	0.004154094
1	1_152692512_G_A	152692512	0	36	A	G	0.111	123023.9	33638.83	0.0009076237	0.0003915291	0.002661851
1	1_152732174_T_C	152732174	0	36	C	T	0.125	138406.8	33566.38	0.0002473265	8.97634e-05	0.001269346
1	1_152749008_C_CCAGCTCTGGGGGCTGCTG	152749008	0	36	CCAGCTCTGGGGGCTGCTG	C	0.097	117607.3	35097.06	0.00207823	0.0009999691	0.004477835
1	1_152777574_G_A	152777574	0	36	A	G	0.139	111355.1	33013.72	0.001959361	0.0009355067	0.004309506
1	1_152777908_C_T	152777908	0	36	T	C	0.139	111355.1	33013.72	0.001959361	0.0009355067	0.004309506
1	1_153276391_T_C	153276391	0	36	C	T	0.014	436664.2	61020.15	4.012093e-08	4.481637e-09	4.648295e-05
1	1_153609027_T_C	153609027	0	36	C	T	0.014	321853.0	80387.58	0.0003465485	0.0001315578	0.001525498
1	1_153662584_GTCTCTCTCTCTC_GTCTCTC	153662584	0	36	GTCTCTC	GTCTCTCTCTCTC	0.056	112914.3	29795.7	0.0006300296	0.0002589499	0.002142905
1	1_153934699_C_T	153934699	0	36	T	C	0.014	321853.0	80387.58	0.0003465485	0.0001315578	0.001525498
1	1_154101673_G_C	154101673	0	36	C	G	0.014	436664.2	61020.15	4.012093e-08	4.481637e-09	4.648295e-05
1	1_154164063_A_G	154164063	0	36	G	A	0.028	208165.6	61339.7	0.001854095	0.0008788437	0.004158229
1	1_154199618_C_G	154199618	0	36	G	C	0.014	436664.2	61020.15	4.012093e-08	4.481637e-09	4.648295e-05
1	1_154224242_G_C	154224242	0	36	C	G	0.014	321853.0	80387.58	0.0003465485	0.0001315578	0.001525498
1	1_154242881_A_C	154242881	0	36	C	A	0.028	221553.1	58681.38	0.0006551038	0.000270653	0.002192408
1	1_154242887_A_C	154242887	0	36	C	A	0.028	221553.1	58681.38	0.0006551038	0.000270653	0.002192408
1	1_154303228_G_A	154303228	0	36	A	G	0.028	244155.6	56852.03	0.0001520563	5.17149e-05	0.0009831386
1	1_154832322_A_C	154832322	0	36	C	A	0.972	-221339.5	59665.9	0.0007857847	0.0003325639	0.002441285
1	1_154920765_G_A	154920765	0	36	A	G	0.014	436664.2	61020.15	4.012093e-08	4.481637e-09	4.648295e-05
1	1_154924015_C_T	154924015	0	36	T	C	0.028	221339.5	59665.9	0.0007857847	0.0003325639	0.002441285
1	1_154924401_G_C	154924401	0	36	C	G	0.014	321853.0	80387.58	0.0003465485	0.0001315578	0.001525498
1	1_154925989_T_C	154925989	0	36	C	T	0.028	221339.5	59665.9	0.0007857847	0.0003325639	0.002441285
1	1_154938757_C_T	154938757	0	36	T	C	0.014	436664.2	61020.15	4.012093e-08	4.481637e-09	4.648295e-05
1	1_154988870_C_T	154988870	0	36	T	C	0.014	436664.2	61020.15	4.012093e-08	4.481637e-09	4.648295e-05
1	1_155257963_C_T	155257963	0	36	T	C	0.014	436664.2	61020.15	4.012093e-08	4.481637e-09	4.648295e-05
1	1_155294665_C_G	155294665	0	36	G	C	0.014	321853.0	80387.58	0.0003465485	0.0001315578	0.001525498
1	1_155695904_CTT_CT	155695904	0	36	CT	CTT	0.097	146367.2	35360.43	0.0002364283	8.529369e-05	0.001239072
1	1_155916973_G_A	155916973	0	36	A	G	0.014	436664.2	61020.15	4.012093e-08	4.481637e-09	4.648295e-05
1	1_156035717_A_G	156035717	0	36	G	A	0.014	321853.0	80387.58	0.0003465485	0.0001315578	0.001525498
1	1_156051820_GGA_G	156051820	0	36	G	GGA	0.083	133674.6	40532.6	0.002392233	0.001172512	0.004911306
1	1_156124380_C_T	156124380	0	36	T	C	0.014	321853.0	80387.58	0.0003465485	0.0001315578	0.001525498
1	1_156314440_T_G	156314440	0	36	G	T	0.028	221560.2	58697.0	0.0006567075	0.0002714036	0.002195554
1	1_156316741_T_C	156316741	0	36	C	T	0.014	321853.0	80387.58	0.0003465485	0.0001315578	0.001525498
1	1_156526430_G_A	156526430	0	36	A	G	0.028	208180.3	61358.86	0.001858164	0.0008810268	0.004164119
1	1_156539320_C_CT	156539320	0	36	CT	C	0.056	104081.8	30661.37	0.001849597	0.0008764316	0.004151716
1	1_156542210_A_G	156542210	0	36	G	A	0.014	436664.2	61020.15	4.012093e-08	4.481637e-09	4.648295e-05
1	1_156617003_A_G	156617003	0	36	G	A	0.028	208174.9	61332.04	0.001851238	0.0008773119	0.004154094
1	1_156819278_C_T	156819278	0	36	T	C	0.014	321853.0	80387.58	0.0003465485	0.0001315578	0.001525498
1	1_156879929_G_A	156879929	0	36	A	G	0.014	321853.0	80387.58	0.0003465485	0.0001315578	0.001525498
1	1_157094381_T_C	157094381	0	36	C	T	0.028	208171.6	61328.22	0.001850456	0.0008768922	0.004152961
1	1_157488435_G_A	157488435	0	36	A	G	0.014	436664.2	61020.15	4.012093e-08	4.481637e-09	4.648295e-05
1	1_157489488_T_C	157489488	0	36	C	T	0.042	183672.6	53280.65	0.001605624	0.0007467951	0.003791809
1	1_157490910_G_A	157490910	0	36	A	G	0.014	436664.2	61020.15	4.012093e-08	4.481637e-09	4.648295e-05
1	1_157548223_T_G	157548223	0	36	G	T	0.014	436664.2	61020.15	4.012093e-08	4.481637e-09	4.648295e-05
1	1_157557945_G_A	157557945	0	36	A	G	0.028	225828.7	59591.41	0.0006300296	0.0002589499	0.002142905
1	1_158151218_A_G	158151218	0	36	G	A	0.139	113928.2	24831.48	6.552092e-05	1.990728e-05	0.0006479065
1	1_158153907_A_G	158153907	0	36	G	A	0.014	321853.0	80387.58	0.0003465485	0.0001315578	0.001525498
1	1_158153943_C_T	158153943	0	36	T	C	0.028	221561.8	58687.92	0.0006555987	0.0002708846	0.002193379
1	1_158224595_G_C	158224595	0	36	C	G	0.028	221561.8	58687.92	0.0006555987	0.0002708846	0.002193379
1	1_158226667_C_T	158226667	0	36	T	C	0.028	221561.8	58687.92	0.0006555987	0.0002708846	0.002193379
1	1_158533111_A_T	158533111	0	36	T	A	0.014	321853.0	80387.58	0.0003465485	0.0001315578	0.001525498
1	1_158596102_A_G	158596102	0	36	G	A	0.014	321853.0	80387.58	0.0003465485	0.0001315578	0.001525498
1	1_158637862_G_A	158637862	0	36	A	G	0.014	321853.0	80387.58	0.0003465485	0.0001315578	0.001525498
1	1_158639742_C_T	158639742	0	36	T	C	0.028	221559.7	58704.62	0.0006576145	0.0002718282	0.002197331
1	1_159275706_G_A	159275706	0	36	A	G	0.028	208171.0	61320.19	0.001848308	0.0008757407	0.004149849
1	1_160106857_G_A	160106857	0	36	A	G	0.028	208170.9	61319.67	0.001848169	0.0008756665	0.004149649
1	1_160253540_T_C	160253540	0	36	C	T	0.014	436664.2	61020.15	4.012093e-08	4.481637e-09	4.648295e-05
1	1_160262330_T_G	160262330	0	36	G	T	0.014	436664.2	61020.15	4.012093e-08	4.481637e-09	4.648295e-05
1	1_160395209_T_G	160395209	0	36	G	T	0.014	321853.0	80387.58	0.0003465485	0.0001315578	0.001525498
1	1_160787782_C_A	160787782	0	36	A	C	0.014	436664.2	61020.15	4.012093e-08	4.481637e-09	4.648295e-05
1	1_160806090_T_A	160806090	0	36	A	T	0.014	436664.2	61020.15	4.012093e-08	4.481637e-09	4.648295e-05
1	1_160852125_C_T	160852125	0	36	T	C	0.028	247985.9	56789.25	0.0001237164	4.093123e-05	0.0008851058
1	1_160853379_A_T	160853379	0	36	T	A	0.028	247985.9	56789.25	0.0001237164	4.093123e-05	0.0008851058
1	1_160854815_C_G	160854815	0	36	G	C	0.014	436664.2	61020.15	4.012093e-08	4.481637e-09	4.648295e-05
1	1_161017445_A_C	161017445	0	36	C	A	0.014	436664.2	61020.15	4.012093e-08	4.481637e-09	4.648295e-05
1	1_161023979_T_C	161023979	0	36	C	T	0.014	436664.2	61020.15	4.012093e-08	4.481637e-09	4.648295e-05
1	1_161102278_C_CGCCCG	161102278	0	36	CGCCCG	C	0.014	436664.2	61020.15	4.012093e-08	4.481637e-09	4.648295e-05
1	1_161183962_A_G	161183962	0	36	G	A	0.014	436664.2	61020.15	4.012093e-08	4.481637e-09	4.648295e-05
1	1_161276804_CAAAAA_CAA	161276804	0	36	CAA	CAAAAA	0.014	436664.2	61020.15	4.012093e-08	4.481637e-09	4.648295e-05
1	1_161332111_G_T	161332111	0	36	T	G	0.431	-162949.5	37582.53	0.0001351826	4.525842e-05	0.000925757
1	1_161336289_A_G	161336289	0	36	G	A	0.028	400526.3	10158.92	1.061351e-28	2.042744e-32	1.294467e-06
1	1_161989811_C_T	161989811	0	36	T	C	0.028	208167.9	61239.19	0.001826468	0.0008640413	0.004118161
1	1_164815937_T_C	164815937	0	36	C	T	0.014	436664.2	61020.15	4.012093e-08	4.481637e-09	4.648295e-05
1	1_165218792_G_A	165218792	0	36	A	G	0.167	95499.52	25549.77	0.0007271365	0.0003045963	0.002331357
1	1_165533005_C_A	165533005	0	36	A	C	0.347	77484.58	22146.51	0.001397522	0.0006382249	0.00347298
1	1_165533188_A_C	165533188	0	36	C	A	0.347	77484.58	22146.51	0.001397522	0.0006382249	0.00347298
1	1_165619424_G_T	165619424	0	36	T	G	0.833	-99026.56	25899.76	0.0005735794	0.00023283	0.002029039
1	1_166590254_A_G	166590254	0	36	G	A	0.069	162724.3	36915.28	0.0001099269	3.579814e-05	0.0008341224
1	1_166829522_C_T	166829522	0	36	T	C	0.014	321853.0	80387.58	0.0003465485	0.0001315578	0.001525498
1	1_166958538_A_T	166958538	0	36	T	A	0.014	321853.0	80387.58	0.0003465485	0.0001315578	0.001525498
1	1_166958550_C_T	166958550	0	36	T	C	0.014	321853.0	80387.58	0.0003465485	0.0001315578	0.001525498
1	1_167487586_C_G	167487586	0	36	G	C	0.153	100436.6	22848.3	0.0001138521	3.7251e-05	0.0008488895
1	1_167734793_C_T	167734793	0	36	T	C	0.111	114919.8	22822.38	1.792838e-05	4.575995e-06	0.0003609018
1	1_167815574_C_G	167815574	0	36	G	C	0.014	321853.0	80387.58	0.0003465485	0.0001315578	0.001525498
1	1_168054180_G_A	168054180	0	36	A	G	0.014	436664.2	61020.15	4.012093e-08	4.481637e-09	4.648295e-05
1	1_168278187_A_G	168278187	0	36	G	A	0.014	436664.2	61020.15	4.012093e-08	4.481637e-09	4.648295e-05
1	1_168510366_G_A	168510366	0	36	A	G	0.014	436664.2	61020.15	4.012093e-08	4.481637e-09	4.648295e-05
1	1_168510395_G_A	168510395	0	36	A	G	0.014	436664.2	61020.15	4.012093e-08	4.481637e-09	4.648295e-05
1	1_168511392_C_T	168511392	0	36	T	C	0.028	231936.7	59560.94	0.0004711466	0.0001863175	0.001812379
1	1_168513084_G_T	168513084	0	36	T	G	0.014	436664.2	61020.15	4.012093e-08	4.481637e-09	4.648295e-05
1	1_169204219_G_A	169204219	0	36	A	G	0.153	112474.7	27602.11	0.0002836656	0.0001048514	0.001366886
1	1_169256677_T_C	169256677	0	36	C	T	0.014	321853.0	80387.58	0.0003465485	0.0001315578	0.001525498
1	1_169349914_G_T	169349914	0	36	T	G	0.167	100168.9	26895.71	0.0007545963	0.0003176555	0.002383161
1	1_169510475_G_T	169510475	0	36	T	G	0.208	104345.7	22976.72	7.49541e-05	2.318803e-05	0.0006911242
1	1_169698657_A_G	169698657	0	36	G	A	0.014	436664.2	61020.15	4.012093e-08	4.481637e-09	4.648295e-05
1	1_170633463_C_G	170633463	0	36	G	C	0.014	436664.2	61020.15	4.012093e-08	4.481637e-09	4.648295e-05
1	1_170940873_T_C	170940873	0	36	C	T	0.014	321853.0	80387.58	0.0003465485	0.0001315578	0.001525498
1	1_171123432_A_C	171123432	0	36	C	A	0.014	321853.0	80387.58	0.0003465485	0.0001315578	0.001525498
1	1_171176877_G_A	171176877	0	36	A	G	0.014	321853.0	80387.58	0.0003465485	0.0001315578	0.001525498
1	1_171496875_A_G	171496875	0	36	G	A	0.139	95006.63	24457.12	0.0004837851	0.0001919897	0.001839912
1	1_171510055_A_G	171510055	0	36	G	A	0.014	321853.0	80387.58	0.0003465485	0.0001315578	0.001525498
1	1_171675563_A_C	171675563	0	36	C	A	0.014	436664.2	61020.15	4.012093e-08	4.481637e-09	4.648295e-05
1	1_172525158_G_A	172525158	0	36	A	G	0.014	321853.0	80387.58	0.0003465485	0.0001315578	0.001525498
1	1_172560354_A_G	172560354	0	36	G	A	0.014	436664.2	61020.15	4.012093e-08	4.481637e-09	4.648295e-05
1	1_173819446_G_A	173819446	0	36	A	G	0.014	436664.2	61020.15	4.012093e-08	4.481637e-09	4.648295e-05
1	1_173835078_C_T	173835078	0	36	T	C	0.028	221575.6	58618.45	0.0006471075	0.0002669143	0.002176689
1	1_174983841_A_G	174983841	0	36	G	A	0.028	221575.6	58618.45	0.0006471075	0.0002669143	0.002176689
1	1_175046886_G_A	175046886	0	36	A	G	0.028	221575.6	58618.45	0.0006471075	0.0002669143	0.002176689
1	1_175092637_C_T	175092637	0	36	T	C	0.014	321853.0	80387.58	0.0003465485	0.0001315578	0.001525498
1	1_175097638_C_G	175097638	0	36	G	C	0.014	321853.0	80387.58	0.0003465485	0.0001315578	0.001525498
1	1_175914422_C_T	175914422	0	36	T	C	0.014	321853.0	80387.58	0.0003465485	0.0001315578	0.001525498
1	1_176105708_G_A	176105708	0	36	A	G	0.083	131333.6	39054.0	0.002013027	0.0009645484	0.004385816
1	1_176137968_G_T	176137968	0	36	T	G	0.028	221560.9	58683.75	0.000655138	0.000270669	0.002192476
1	1_176845609_CATAG_C	176845609	0	36	C	CATAG	0.014	436664.2	61020.15	4.012093e-08	4.481637e-09	4.648295e-05
1	1_178515190_C_A	178515190	0	36	A	C	0.014	321853.0	80387.58	0.0003465485	0.0001315578	0.001525498
1	1_178834603_T_C	178834603	0	36	C	T	0.014	321853.0	80387.58	0.0003465485	0.0001315578	0.001525498
1	1_179503909_A_G	179503909	0	36	G	A	0.014	321853.0	80387.58	0.0003465485	0.0001315578	0.001525498
1	1_180283709_G_GT	180283709	0	36	GT	G	0.014	436664.2	61020.15	4.012093e-08	4.481637e-09	4.648295e-05
1	1_180885754_C_T	180885754	0	36	T	C	0.014	321853.0	80387.58	0.0003465485	0.0001315578	0.001525498
1	1_180910137_T_TC	180910137	0	36	TC	T	0.083	109362.4	30821.82	0.001222099	0.0005483244	0.003193807
1	1_181694986_ACG_A	181694986	0	36	A	ACG	0.014	436664.2	61020.15	4.012093e-08	4.481637e-09	4.648295e-05
1	1_181694990_TATAGC_T	181694990	0	36	T	TATAGC	0.014	436664.2	61020.15	4.012093e-08	4.481637e-09	4.648295e-05
1	1_181732031_G_A	181732031	0	36	A	G	0.014	436664.2	61020.15	4.012093e-08	4.481637e-09	4.648295e-05
1	1_181740419_TCTC_T	181740419	0	36	T	TCTC	0.014	436664.2	61020.15	4.012093e-08	4.481637e-09	4.648295e-05
1	1_181740576_T_A	181740576	0	36	A	T	0.014	436664.2	61020.15	4.012093e-08	4.481637e-09	4.648295e-05
1	1_181762956_C_G	181762956	0	36	G	C	0.028	208171.6	61328.22	0.001850456	0.0008768922	0.004152961
1	1_182354673_G_C	182354673	0	36	C	G	0.014	321853.0	80387.58	0.0003465485	0.0001315578	0.001525498
1	1_182429962_G_A	182429962	0	36	A	G	0.014	436664.2	61020.15	4.012093e-08	4.481637e-09	4.648295e-05
1	1_182635818_C_T	182635818	0	36	T	C	0.014	321853.0	80387.58	0.0003465485	0.0001315578	0.001525498
1	1_182922000_TCCG_T	182922000	0	36	T	TCCG	0.014	436664.2	61020.15	4.012093e-08	4.481637e-09	4.648295e-05
1	1_183100326_G_A	183100326	0	36	A	G	0.042	267062.0	37215.36	3.792997e-08	4.20471e-09	4.580772e-05
1	1_183100327_G_A	183100327	0	36	A	G	0.042	267062.0	37215.36	3.792997e-08	4.20471e-09	4.580772e-05
1	1_183100328_T_A	183100328	0	36	A	T	0.056	197292.3	38370.15	1.315535e-05	3.220522e-06	0.00031677
1	1_183529339_G_A	183529339	0	36	A	G	0.028	221575.6	58618.45	0.0006471075	0.0002669143	0.002176689
1	1_183533001_T_G	183533001	0	36	G	T	0.014	436664.2	61020.15	4.012093e-08	4.481637e-09	4.648295e-05
1	1_183602076_T_A	183602076	0	36	A	T	0.014	321853.0	80387.58	0.0003465485	0.0001315578	0.001525498
1	1_183871646_T_C	183871646	0	36	C	T	0.028	221575.6	58618.45	0.0006471075	0.0002669143	0.002176689
1	1_183920191_T_G	183920191	0	36	G	T	0.028	208174.8	61334.78	0.001851996	0.0008777182	0.004155191
1	1_183938341_C_A	183938341	0	36	A	C	0.028	221339.5	59665.9	0.0007857847	0.0003325639	0.002441285
1	1_184679716_C_A	184679716	0	36	A	C	0.014	321853.0	80387.58	0.0003465485	0.0001315578	0.001525498
1	1_184777082_A_G	184777082	0	36	G	A	0.014	321853.0	80387.58	0.0003465485	0.0001315578	0.001525498
1	1_184777177_C_A	184777177	0	36	A	C	0.056	200452.9	40366.82	2.194895e-05	5.756974e-06	0.0003937552
1	1_185278199_C_T	185278199	0	36	T	C	0.014	321853.0	80387.58	0.0003465485	0.0001315578	0.001525498
1	1_186277681_A_G	186277681	0	36	G	A	0.014	436664.2	61020.15	4.012093e-08	4.481637e-09	4.648295e-05
1	1_186304127_A_G	186304127	0	36	G	A	0.014	321853.0	80387.58	0.0003465485	0.0001315578	0.001525498
1	1_193045734_C_A	193045734	0	36	A	C	0.014	436664.2	61020.15	4.012093e-08	4.481637e-09	4.648295e-05
1	1_193074611_C_T	193074611	0	36	T	C	0.014	436664.2	61020.15	4.012093e-08	4.481637e-09	4.648295e-05
1	1_196303287_AAT_A	196303287	0	36	A	AAT	0.014	321853.0	80387.58	0.0003465485	0.0001315578	0.001525498
1	1_196757255_T_C	196757255	0	36	C	T	0.014	436664.2	61020.15	4.012093e-08	4.481637e-09	4.648295e-05
1	1_196797186_T_C	196797186	0	36	C	T	0.014	436664.2	61020.15	4.012093e-08	4.481637e-09	4.648295e-05
1	1_196874192_A_G	196874192	0	36	G	A	0.028	208174.8	61334.78	0.001851996	0.0008777182	0.004155191
1	1_196920053_A_G	196920053	0	36	G	A	0.028	221562.2	58701.93	0.0006572218	0.0002716443	0.002196562
1	1_196951925_A_G	196951925	0	36	G	A	0.028	208174.8	61334.78	0.001851996	0.0008777182	0.004155191
1	1_197029598_C_G	197029598	0	36	G	C	0.014	436664.2	61020.15	4.012093e-08	4.481637e-09	4.648295e-05
1	1_197641401_G_C	197641401	0	36	C	G	0.014	436664.2	61020.15	4.012093e-08	4.481637e-09	4.648295e-05
1	1_198222215_C_G	198222215	0	36	G	C	0.028	208227.3	61337.8	0.001848587	0.0008758902	0.004150253
1	1_198721651_A_T	198721651	0	36	T	A	0.028	208174.0	61337.64	0.001852848	0.0008781754	0.004156425
1	1_201044592_T_C	201044592	0	36	C	T	0.014	436664.2	61020.15	4.012093e-08	4.481637e-09	4.648295e-05
1	1_201047111_A_G	201047111	0	36	G	A	0.333	86484.63	22940.07	0.000665153	0.0002753601	0.002212076
1	1_201052310_A_T	201052310	0	36	T	A	0.333	86484.63	22940.07	0.000665153	0.0002753601	0.002212076
1	1_201052312_A_C	201052312	0	36	C	A	0.333	86484.63	22940.07	0.000665153	0.0002753601	0.002212076
1	1_201052474_T_C	201052474	0	36	C	T	0.333	86484.63	22940.07	0.000665153	0.0002753601	0.002212076
1	1_201052562_G_T	201052562	0	36	T	G	0.319	96893.56	23526.72	0.0002507979	9.119267e-05	0.001278883
1	1_201054863_G_A	201054863	0	36	A	G	0.014	436664.2	61020.15	4.012093e-08	4.481637e-09	4.648295e-05
1	1_201179103_T_C	201179103	0	36	C	T	0.014	321853.0	80387.58	0.0003465485	0.0001315578	0.001525498
1	1_201184294_C_T	201184294	0	36	T	C	0.014	321853.0	80387.58	0.0003465485	0.0001315578	0.001525498
1	1_201351337_C_T	201351337	0	36	T	C	0.083	127917.5	37420.73	0.001735319	0.0008154121	0.003984813
1	1_201351644_TGAAATGACTCCTCCTCTCCC_T	201351644	0	36	T	TGAAATGACTCCTCCTCTCCC	0.042	267111.9	37222.51	3.793397e-08	4.205213e-09	4.580897e-05
1	1_201353825_C_T	201353825	0	36	T	C	0.069	156709.3	38828.4	0.0003165544	0.0001187312	0.001451269
1	1_201465555_G_A	201465555	0	36	A	G	0.014	436664.2	61020.15	4.012093e-08	4.481637e-09	4.648295e-05
1	1_201867456_C_T	201867456	0	36	T	C	0.014	436664.2	61020.15	4.012093e-08	4.481637e-09	4.648295e-05
1	1_202097524_ACTG_A	202097524	0	36	A	ACTG	0.028	225828.7	59591.41	0.0006300296	0.0002589499	0.002142905
1	1_202155334_CCCCCTTGCCCCCTTG_CCCCCCTTG	202155334	0	36	CCCCCCTTG	CCCCCTTGCCCCCTTG	0.014	436664.2	61020.15	4.012093e-08	4.481637e-09	4.648295e-05
1	1_202155349_G_C	202155349	0	36	C	G	0.014	436664.2	61020.15	4.012093e-08	4.481637e-09	4.648295e-05
1	1_202155357_G_C	202155357	0	36	C	G	0.028	244155.6	56852.03	0.0001520563	5.17149e-05	0.0009831386
1	1_202155363_TTG_T	202155363	0	36	T	TTG	0.014	436664.2	61020.15	4.012093e-08	4.481637e-09	4.648295e-05
1	1_202155370_CTTCCCA_C	202155370	0	36	C	CTTCCCA	0.014	436664.2	61020.15	4.012093e-08	4.481637e-09	4.648295e-05
1	1_202183327_C_T	202183327	0	36	T	C	0.028	208171.6	61328.22	0.001850456	0.0008768922	0.004152961
1	1_202302065_AAAAC_A	202302065	0	36	A	AAAAC	0.014	321853.0	80387.58	0.0003465485	0.0001315578	0.001525498
1	1_202302073_A_T	202302073	0	36	T	A	0.014	321853.0	80387.58	0.0003465485	0.0001315578	0.001525498
1	1_202399727_G_C	202399727	0	36	C	G	0.014	436664.2	61020.15	4.012093e-08	4.481637e-09	4.648295e-05
1	1_202933556_A_T	202933556	0	36	T	A	0.014	436664.2	61020.15	4.012093e-08	4.481637e-09	4.648295e-05
1	1_202934777_TGAGTCAGAG_T	202934777	0	36	T	TGAGTCAGAG	0.014	436664.2	61020.15	4.012093e-08	4.481637e-09	4.648295e-05
1	1_203017889_T_G	203017889	0	36	G	T	0.028	231936.7	59560.94	0.0004711466	0.0001863175	0.001812379
1	1_203020813_C_T	203020813	0	36	T	C	0.014	321853.0	80387.58	0.0003465485	0.0001315578	0.001525498
1	1_203097229_G_A	203097229	0	36	A	G	0.014	321853.0	80387.58	0.0003465485	0.0001315578	0.001525498
1	1_203148918_A_G	203148918	0	36	G	A	0.014	436664.2	61020.15	4.012093e-08	4.481637e-09	4.648295e-05
1	1_203154465_C_T	203154465	0	36	T	C	0.014	321853.0	80387.58	0.0003465485	0.0001315578	0.001525498
1	1_203673055_G_T	203673055	0	36	T	G	0.028	208174.8	61334.78	0.001851996	0.0008777182	0.004155191
1	1_203819098_G_A	203819098	0	36	A	G	0.014	436664.2	61020.15	4.012093e-08	4.481637e-09	4.648295e-05
1	1_204095266_C_T	204095266	0	36	T	C	0.014	436664.2	61020.15	4.012093e-08	4.481637e-09	4.648295e-05
1	1_204125093_C_T	204125093	0	36	T	C	0.014	436664.2	61020.15	4.012093e-08	4.481637e-09	4.648295e-05
1	1_204218563_G_A	204218563	0	36	A	G	0.014	436664.2	61020.15	4.012093e-08	4.481637e-09	4.648295e-05
1	1_204435989_G_A	204435989	0	36	A	G	0.014	436664.2	61020.15	4.012093e-08	4.481637e-09	4.648295e-05
1	1_204915347_G_A	204915347	0	36	A	G	0.014	321853.0	80387.58	0.0003465485	0.0001315578	0.001525498
1	1_204926683_C_T	204926683	0	36	T	C	0.028	208170.9	61319.67	0.001848169	0.0008756665	0.004149649
1	1_204944532_C_G	204944532	0	36	G	C	0.014	321853.0	80387.58	0.0003465485	0.0001315578	0.001525498
1	1_205039019_G_A	205039019	0	36	A	G	0.014	436664.2	61020.15	4.012093e-08	4.481637e-09	4.648295e-05
1	1_206649492_A_G	206649492	0	36	G	A	0.014	436664.2	61020.15	4.012093e-08	4.481637e-09	4.648295e-05
1	1_206652404_G_A	206652404	0	36	A	G	0.014	321853.0	80387.58	0.0003465485	0.0001315578	0.001525498
1	1_206664858_T_C	206664858	0	36	C	T	0.014	321853.0	80387.58	0.0003465485	0.0001315578	0.001525498
1	1_206711674_C_CG	206711674	0	36	CG	C	0.014	436664.2	61020.15	4.012093e-08	4.481637e-09	4.648295e-05
1	1_206731119_C_T	206731119	0	36	T	C	0.014	436664.2	61020.15	4.012093e-08	4.481637e-09	4.648295e-05
1	1_206766823_CGCGA_C	206766823	0	36	C	CGCGA	0.028	221560.2	58697.0	0.0006567075	0.0002714036	0.002195554
1	1_206904464_C_T	206904464	0	36	T	C	0.264	73158.98	19838.0	0.0008344296	0.0003559716	0.002530529
1	1_207087007_G_C	207087007	0	36	C	G	0.014	436664.2	61020.15	4.012093e-08	4.481637e-09	4.648295e-05
1	1_207091138_ATT_AT	207091138	0	36	AT	ATT	0.194	85914.87	25977.23	0.002333612	0.001140064	0.004831512
1	1_207140901_G_T	207140901	0	36	T	G	0.014	436664.2	61020.15	4.012093e-08	4.481637e-09	4.648295e-05
1	1_207782608_G_A	207782608	0	36	A	G	0.014	436664.2	61020.15	4.012093e-08	4.481637e-09	4.648295e-05
1	1_207793289_A_C	207793289	0	36	C	A	0.014	436664.2	61020.15	4.012093e-08	4.481637e-09	4.648295e-05
1	1_207818729_G_C	207818729	0	36	C	G	0.014	436664.2	61020.15	4.012093e-08	4.481637e-09	4.648295e-05
1	1_207930564_C_CT	207930564	0	36	CT	C	0.028	221339.5	59665.9	0.0007857847	0.0003325639	0.002441285
1	1_208084424_A_G	208084424	0	36	G	A	0.014	436664.2	61020.15	4.012093e-08	4.481637e-09	4.648295e-05
1	1_208084599_T_C	208084599	0	36	C	T	0.014	321853.0	80387.58	0.0003465485	0.0001315578	0.001525498
1	1_209951400_C_G	209951400	0	36	G	C	0.056	209374.0	36684.45	2.536068e-06	4.970643e-07	0.0001671011
1	1_210414879_CT_C	210414879	0	36	C	CT	0.028	208170.5	61305.18	0.001844241	0.000873561	0.004143957
1	1_210414906_A_T	210414906	0	36	T	A	0.028	247985.9	56789.25	0.0001237164	4.093123e-05	0.0008851058
1	1_211444788_AT_A	211444788	0	36	A	AT	0.028	221562.2	58701.93	0.0006572218	0.0002716443	0.002196562
1	1_211843609_C_A	211843609	0	36	A	C	0.083	129794.2	38566.29	0.001999062	0.0009569812	0.004366009
1	1_211847579_G_T	211847579	0	36	T	G	0.083	129794.2	38566.29	0.001999062	0.0009569812	0.004366009
1	1_211847586_A_T	211847586	0	36	T	A	0.083	129794.2	38566.29	0.001999062	0.0009569812	0.004366009
1	1_212799882_A_T	212799882	0	36	T	A	0.014	321853.0	80387.58	0.0003465485	0.0001315578	0.001525498
1	1_212870229_A_C	212870229	0	36	C	A	0.014	321853.0	80387.58	0.0003465485	0.0001315578	0.001525498
1	1_213161831_A_G	213161831	0	36	G	A	0.028	208186.3	61328.14	0.001849249	0.0008762456	0.004151214
1	1_213161834_T_C	213161834	0	36	C	T	0.028	208186.3	61328.14	0.001849249	0.0008762456	0.004151214
1	1_214588223_A_G	214588223	0	36	G	A	0.014	321853.0	80387.58	0.0003465485	0.0001315578	0.001525498
1	1_215901790_G_A	215901790	0	36	A	G	0.014	436664.2	61020.15	4.012093e-08	4.481637e-09	4.648295e-05
1	1_215916752_G_GTATATATA	215916752	0	36	GTATATATA	G	0.014	436664.2	61020.15	4.012093e-08	4.481637e-09	4.648295e-05
1	1_216219841_G_T	216219841	0	36	T	G	0.014	321853.0	80387.58	0.0003465485	0.0001315578	0.001525498
1	1_216373471_G_GA	216373471	0	36	GA	G	0.014	321853.0	80387.58	0.0003465485	0.0001315578	0.001525498
1	1_216465427_A_C	216465427	0	36	C	A	0.014	436664.2	61020.15	4.012093e-08	4.481637e-09	4.648295e-05
1	1_217804767_A_G	217804767	0	36	G	A	0.014	436664.2	61020.15	4.012093e-08	4.481637e-09	4.648295e-05
1	1_222647006_C_G	222647006	0	36	G	C	0.014	321853.0	80387.58	0.0003465485	0.0001315578	0.001525498
1	1_222823669_A_G	222823669	0	36	G	A	0.014	321853.0	80387.58	0.0003465485	0.0001315578	0.001525498
1	1_223116579_G_A	223116579	0	36	A	G	0.014	321853.0	80387.58	0.0003465485	0.0001315578	0.001525498
1	1_223932769_T_G	223932769	0	36	G	T	0.014	321853.0	80387.58	0.0003465485	0.0001315578	0.001525498
1	1_223954028_C_A	223954028	0	36	A	C	0.028	208174.8	61334.78	0.001851996	0.0008777182	0.004155191
1	1_224001963_G_A	224001963	0	36	A	G	0.014	321853.0	80387.58	0.0003465485	0.0001315578	0.001525498
1	1_224418939_T_C	224418939	0	36	C	T	0.028	208170.5	61305.18	0.001844241	0.000873561	0.004143957
1	1_224492783_T_A	224492783	0	36	A	T	0.028	208170.5	61305.18	0.001844241	0.000873561	0.004143957
1	1_224548330_T_A	224548330	0	36	A	T	0.014	321853.0	80387.58	0.0003465485	0.0001315578	0.001525498
1	1_224585772_A_T	224585772	0	36	T	A	0.028	208170.5	61305.18	0.001844241	0.000873561	0.004143957
1	1_224621318_T_C	224621318	0	36	C	T	0.014	436664.2	61020.15	4.012093e-08	4.481637e-09	4.648295e-05
1	1_224927023_G_T	224927023	0	36	T	G	0.028	208170.9	61319.67	0.001848169	0.0008756665	0.004149649
1	1_224927024_C_T	224927024	0	36	T	C	0.028	208170.9	61319.67	0.001848169	0.0008756665	0.004149649
1	1_224927025_A_T	224927025	0	36	T	A	0.028	208170.9	61319.67	0.001848169	0.0008756665	0.004149649
1	1_225152222_C_T	225152222	0	36	T	C	0.014	321853.0	80387.58	0.0003465485	0.0001315578	0.001525498
1	1_225306982_C_T	225306982	0	36	T	C	0.028	208170.5	61305.18	0.001844241	0.000873561	0.004143957
1	1_226065398_G_C	226065398	0	36	C	G	0.028	208170.5	61305.18	0.001844241	0.000873561	0.004143957
1	1_226259181_G_A	226259181	0	36	A	G	0.028	208163.7	61322.74	0.001849597	0.0008764316	0.004151716
1	1_226567241_C_T	226567241	0	36	T	C	0.014	321853.0	80387.58	0.0003465485	0.0001315578	0.001525498
1	1_226825294_G_A	226825294	0	36	A	G	0.028	208170.5	61305.18	0.001844241	0.000873561	0.004143957
1	1_227218986_T_C	227218986	0	36	C	T	0.028	223410.5	59629.74	0.0007095927	0.0002962867	0.002297936
1	1_228111814_A_C	228111814	0	36	C	A	0.028	221562.4	58684.8	0.0006552156	0.0002707054	0.002192628
1	1_228401070_T_TC	228401070	0	36	TC	T	0.014	436664.2	61020.15	4.012093e-08	4.481637e-09	4.648295e-05
1	1_228522357_G_A	228522357	0	36	A	G	0.014	321853.0	80387.58	0.0003465485	0.0001315578	0.001525498
1	1_228540625_T_A	228540625	0	36	A	T	0.014	321853.0	80387.58	0.0003465485	0.0001315578	0.001525498
1	1_228602486_T_C	228602486	0	36	C	T	0.014	321853.0	80387.58	0.0003465485	0.0001315578	0.001525498
1	1_228612822_G_A	228612822	0	36	A	G	0.014	436664.2	61020.15	4.012093e-08	4.481637e-09	4.648295e-05
1	1_228675539_C_T	228675539	0	36	T	C	0.014	321853.0	80387.58	0.0003465485	0.0001315578	0.001525498
1	1_228675639_G_C	228675639	0	36	C	G	0.014	321853.0	80387.58	0.0003465485	0.0001315578	0.001525498
1	1_228675644_G_C	228675644	0	36	C	G	0.014	321853.0	80387.58	0.0003465485	0.0001315578	0.001525498
1	1_228675646_T_G	228675646	0	36	G	T	0.014	321853.0	80387.58	0.0003465485	0.0001315578	0.001525498
1	1_228698299_G_A	228698299	0	36	A	G	0.014	436664.2	61020.15	4.012093e-08	4.481637e-09	4.648295e-05
1	1_230410150_C_T	230410150	0	36	T	C	0.014	436664.2	61020.15	4.012093e-08	4.481637e-09	4.648295e-05
1	1_230498196_C_T	230498196	0	36	T	C	0.014	321853.0	80387.58	0.0003465485	0.0001315578	0.001525498
1	1_230822903_C_T	230822903	0	36	T	C	0.097	130706.1	34884.06	0.0007091198	0.0002960631	0.002297032
1	1_230841687_T_C	230841687	0	36	C	T	0.917	-142448.7	35475.29	0.0003353627	0.0001267564	0.001498096
1	1_230907799_C_T	230907799	0	36	T	C	0.014	321853.0	80387.58	0.0003465485	0.0001315578	0.001525498
1	1_231079429_C_T	231079429	0	36	T	C	0.014	436664.2	61020.15	4.012093e-08	4.481637e-09	4.648295e-05
1	1_231335983_C_T	231335983	0	36	T	C	0.028	244155.6	56852.03	0.0001520563	5.17149e-05	0.0009831386
1	1_232596728_G_A	232596728	0	36	A	G	0.014	436664.2	61020.15	4.012093e-08	4.481637e-09	4.648295e-05
1	1_233112093_G_A	233112093	0	36	A	G	0.014	321853.0	80387.58	0.0003465485	0.0001315578	0.001525498
1	1_233112095_A_G	233112095	0	36	G	A	0.069	156602.1	38797.44	0.0003161471	0.0001185581	0.001450244
1	1_233190309_T_C	233190309	0	36	C	T	0.014	321853.0	80387.58	0.0003465485	0.0001315578	0.001525498
1	1_233296153_G_A	233296153	0	36	A	G	0.014	436664.2	61020.15	4.012093e-08	4.481637e-09	4.648295e-05
1	1_233362941_C_T	233362941	0	36	T	C	0.014	321853.0	80387.58	0.0003465485	0.0001315578	0.001525498
1	1_233463785_G_C	233463785	0	36	C	G	0.028	221562.4	58684.8	0.0006552156	0.0002707054	0.002192628
1	1_234566267_A_G	234566267	0	36	G	A	0.028	221561.8	58687.92	0.0006555987	0.0002708846	0.002193379
1	1_235345357_G_A	235345357	0	36	A	G	0.028	208186.3	61328.14	0.001849249	0.0008762456	0.004151214
1	1_235506133_C_CT	235506133	0	36	CT	C	0.014	321853.0	80387.58	0.0003465485	0.0001315578	0.001525498
1	1_235564698_C_G	235564698	0	36	G	C	0.014	321853.0	80387.58	0.0003465485	0.0001315578	0.001525498
1	1_235715532_G_A	235715532	0	36	A	G	0.028	208174.8	61334.78	0.001851996	0.0008777182	0.004155191
1	1_235907214_A_G	235907214	0	36	G	A	0.014	321853.0	80387.58	0.0003465485	0.0001315578	0.001525498
1	1_236176845_C_T	236176845	0	36	T	C	0.014	436664.2	61020.15	4.012093e-08	4.481637e-09	4.648295e-05
1	1_236187618_C_T	236187618	0	36	T	C	0.014	436664.2	61020.15	4.012093e-08	4.481637e-09	4.648295e-05
1	1_236196017_A_T	236196017	0	36	T	A	0.014	436664.2	61020.15	4.012093e-08	4.481637e-09	4.648295e-05
1	1_236978983_C_T	236978983	0	36	T	C	0.014	436664.2	61020.15	4.012093e-08	4.481637e-09	4.648295e-05
1	1_237693682_C_G	237693682	0	36	G	C	0.014	321853.0	80387.58	0.0003465485	0.0001315578	0.001525498
1	1_237969452_G_A	237969452	0	36	A	G	0.014	436664.2	61020.15	4.012093e-08	4.481637e-09	4.648295e-05
1	1_238053138_A_C	238053138	0	36	C	A	0.028	400526.3	10158.92	1.061351e-28	2.042744e-32	1.294467e-06
1	1_240370934_G_C	240370934	0	36	C	G	0.014	436664.2	61020.15	4.012093e-08	4.481637e-09	4.648295e-05
1	1_240370941_TCCTCCGCCCCCTCTACCCGGAGCGGCAATACCC_CCCTCCGCCCCCTCTACCCGGAGCGGCAATACCC	240370941	0	36	CCCTCCGCCCCCTCTACCCGGAGCGGCAATACCC	TCCTCCGCCCCCTCTACCCGGAGCGGCAATACCC	0.014	436664.2	61020.15	4.012093e-08	4.481637e-09	4.648295e-05
1	1_240370952_C_T	240370952	0	36	T	C	0.014	436664.2	61020.15	4.012093e-08	4.481637e-09	4.648295e-05
1	1_240370956_A_T	240370956	0	36	T	A	0.014	436664.2	61020.15	4.012093e-08	4.481637e-09	4.648295e-05
1	1_240370962_A_G	240370962	0	36	G	A	0.014	436664.2	61020.15	4.012093e-08	4.481637e-09	4.648295e-05
1	1_240370964_C_CA	240370964	0	36	CA	C	0.014	436664.2	61020.15	4.012093e-08	4.481637e-09	4.648295e-05
1	1_240370967_CA_C	240370967	0	36	C	CA	0.014	436664.2	61020.15	4.012093e-08	4.481637e-09	4.648295e-05
1	1_240370976_C_T	240370976	0	36	T	C	0.014	436664.2	61020.15	4.012093e-08	4.481637e-09	4.648295e-05
1	1_240370980_G_T	240370980	0	36	T	G	0.014	436664.2	61020.15	4.012093e-08	4.481637e-09	4.648295e-05
1	1_240370998_A_AGGAATACCTCCTCCACCCCCTCTACCCGGAGCG	240370998	0	36	AGGAATACCTCCTCCACCCCCTCTACCCGGAGCG	A	0.014	436664.2	61020.15	4.012093e-08	4.481637e-09	4.648295e-05
1	1_241875241_C_T	241875241	0	36	T	C	0.056	144197.2	33503.57	0.0001480507	5.017317e-05	0.0009697577
1	1_241886790_T_C	241886790	0	36	C	T	0.056	144197.2	33503.57	0.0001480507	5.017317e-05	0.0009697577
1	1_241943271_C_G	241943271	0	36	G	C	0.028	208179.4	61352.55	0.001856499	0.0008801335	0.00416171
1	1_241951107_A_C	241951107	0	36	C	A	0.028	208179.4	61352.55	0.001856499	0.0008801335	0.00416171
1	1_242121882_T_C	242121882	0	36	C	T	0.014	436664.2	61020.15	4.012093e-08	4.481637e-09	4.648295e-05
1	1_243354253_C_A	243354253	0	36	A	C	0.028	223410.5	59629.74	0.0007095927	0.0002962867	0.002297936
1	1_243388643_A_G	243388643	0	36	G	A	0.028	223410.5	59629.74	0.0007095927	0.0002962867	0.002297936
1	1_245133579_G_C	245133579	0	36	C	G	0.028	208173.6	61339.8	0.001853476	0.0008785118	0.004157334
1	1_245133584_G_C	245133584	0	36	C	G	0.028	208173.6	61339.8	0.001853476	0.0008785118	0.004157334
1	1_245285240_G_A	245285240	0	36	A	G	0.014	436664.2	61020.15	4.012093e-08	4.481637e-09	4.648295e-05
1	1_246797425_A_G	246797425	0	36	G	A	0.014	321853.0	80387.58	0.0003465485	0.0001315578	0.001525498
1	1_246797713_T_TG	246797713	0	36	TG	T	0.014	321853.0	80387.58	0.0003465485	0.0001315578	0.001525498
1	1_246805265_A_G	246805265	0	36	G	A	0.014	321853.0	80387.58	0.0003465485	0.0001315578	0.001525498
1	1_247025087_T_C	247025087	0	36	C	T	0.014	436664.2	61020.15	4.012093e-08	4.481637e-09	4.648295e-05
1	1_247287050_G_A	247287050	0	36	A	G	0.014	436664.2	61020.15	4.012093e-08	4.481637e-09	4.648295e-05
1	1_247694688_A_G	247694688	0	36	G	A	0.028	208157.4	61270.85	0.001835922	0.0008691033	0.00413189
1	1_248201970_G_A	248201970	0	36	A	G	0.014	436664.2	61020.15	4.012093e-08	4.481637e-09	4.648295e-05
1	1_248224746_G_T	248224746	0	36	T	G	0.028	208174.9	61332.04	0.001851238	0.0008773119	0.004154094
1	1_248247206_G_C	248247206	0	36	C	G	0.014	436664.2	61020.15	4.012093e-08	4.481637e-09	4.648295e-05
1	1_248263471_G_A	248263471	0	36	A	G	0.014	436664.2	61020.15	4.012093e-08	4.481637e-09	4.648295e-05
1	1_248263584_G_C	248263584	0	36	C	G	0.014	436664.2	61020.15	4.012093e-08	4.481637e-09	4.648295e-05
1	1_248436809_G_A	248436809	0	36	A	G	0.458	-173740.2	52854.11	0.002461548	0.001211013	0.005005042
1	1_248436811_G_C	248436811	0	36	C	G	0.458	-173740.2	52854.11	0.002461548	0.001211013	0.005005042
1	1_248437032_C_G	248437032	0	36	G	C	0.014	321853.0	80387.58	0.0003465485	0.0001315578	0.001525498
1	1_248814126_G_A	248814126	0	36	A	G	0.458	-114215.7	31500.37	0.0009889835	0.0004314974	0.002804104
1	1_249141454_C_T	249141454	0	36	T	C	0.069	137353.1	31049.61	0.0001051135	3.402598e-05	0.0008157134
1	1_249208048_C_T	249208048	0	36	T	C	0.014	321853.0	80387.58	0.0003465485	0.0001315578	0.001525498
2	2_905736_A_T	905736	0	36	T	A	0.014	436664.2	61020.15	4.012093e-08	4.481637e-09	4.648295e-05
2	2_905889_C_G	905889	0	36	G	C	0.056	144146.3	33494.55	0.0001482038	5.023197e-05	0.0009702715
2	2_905931_G_C	905931	0	36	C	G	0.028	208163.7	61322.74	0.001849597	0.0008764316	0.004151716
2	2_905945_T_G	905945	0	36	G	T	0.014	436664.2	61020.15	4.012093e-08	4.481637e-09	4.648295e-05
2	2_1093824_C_T	1093824	0	36	T	C	0.014	321853.0	80387.58	0.0003465485	0.0001315578	0.001525498
2	2_1546300_C_T	1546300	0	36	T	C	0.014	436664.2	61020.15	4.012093e-08	4.481637e-09	4.648295e-05
2	2_1842892_G_A	1842892	0	36	A	G	0.014	436664.2	61020.15	4.012093e-08	4.481637e-09	4.648295e-05
2	2_1844671_TC_T	1844671	0	36	T	TC	0.028	247985.9	56789.25	0.0001237164	4.093123e-05	0.0008851058
2	2_1926617_G_A	1926617	0	36	A	G	0.014	436664.2	61020.15	4.012093e-08	4.481637e-09	4.648295e-05
2	2_3261195_G_C	3261195	0	36	C	G	0.014	321853.0	80387.58	0.0003465485	0.0001315578	0.001525498
2	2_3392499_C_G	3392499	0	36	G	C	0.014	436664.2	61020.15	4.012093e-08	4.481637e-09	4.648295e-05
2	2_3691531_C_T	3691531	0	36	T	C	0.014	321853.0	80387.58	0.0003465485	0.0001315578	0.001525498
2	2_3817255_T_C	3817255	0	36	C	T	0.014	321853.0	80387.58	0.0003465485	0.0001315578	0.001525498
2	2_5833884_C_CCAGCAGCAGCGG	5833884	0	36	CCAGCAGCAGCGG	C	0.014	321853.0	80387.58	0.0003465485	0.0001315578	0.001525498
2	2_7030221_G_T	7030221	0	36	T	G	0.014	321853.0	80387.58	0.0003465485	0.0001315578	0.001525498
2	2_7130552_CACACACACACACACAG_C	7130552	0	36	C	CACACACACACACACAG	0.028	208170.9	61319.67	0.001848169	0.0008756665	0.004149649
2	2_7170430_GTGTGTGTA_G	7170430	0	36	G	GTGTGTGTA	0.014	321853.0	80387.58	0.0003465485	0.0001315578	0.001525498
2	2_7170432_GTGTGTA_G	7170432	0	36	G	GTGTGTA	0.014	321853.0	80387.58	0.0003465485	0.0001315578	0.001525498
2	2_8872132_AT_A	8872132	0	36	A	AT	0.014	321853.0	80387.58	0.0003465485	0.0001315578	0.001525498
2	2_8910736_GTT_GT	8910736	0	36	GT	GTT	0.208	84994.9	25347.86	0.002065958	0.0009932917	0.004460574
2	2_8938357_T_C	8938357	0	36	C	T	0.014	321853.0	80387.58	0.0003465485	0.0001315578	0.001525498
2	2_9008502_T_C	9008502	0	36	C	T	0.014	436664.2	61020.15	4.012093e-08	4.481637e-09	4.648295e-05
2	2_9114601_T_G	9114601	0	36	G	T	0.028	208163.7	61322.74	0.001849597	0.0008764316	0.004151716
2	2_9143763_G_C	9143763	0	36	C	G	0.014	436664.2	61020.15	4.012093e-08	4.481637e-09	4.648295e-05
2	2_9525609_G_A	9525609	0	36	A	G	0.014	436664.2	61020.15	4.012093e-08	4.481637e-09	4.648295e-05
2	2_9615344_C_G	9615344	0	36	G	C	0.014	321853.0	80387.58	0.0003465485	0.0001315578	0.001525498
2	2_9992283_C_A	9992283	0	36	A	C	0.014	321853.0	80387.58	0.0003465485	0.0001315578	0.001525498
2	2_10747407_A_C	10747407	0	36	C	A	0.028	208186.3	61328.14	0.001849249	0.0008762456	0.004151214
2	2_11586556_G_A	11586556	0	36	A	G	0.014	436664.2	61020.15	4.012093e-08	4.481637e-09	4.648295e-05
2	2_11755256_C_G	11755256	0	36	G	C	0.014	321853.0	80387.58	0.0003465485	0.0001315578	0.001525498
2	2_11772939_C_T	11772939	0	36	T	C	0.014	436664.2	61020.15	4.012093e-08	4.481637e-09	4.648295e-05
2	2_11778678_C_T	11778678	0	36	T	C	0.014	321853.0	80387.58	0.0003465485	0.0001315578	0.001525498
2	2_11780469_C_T	11780469	0	36	T	C	0.014	436664.2	61020.15	4.012093e-08	4.481637e-09	4.648295e-05
2	2_11945084_A_G	11945084	0	36	G	A	0.014	436664.2	61020.15	4.012093e-08	4.481637e-09	4.648295e-05
2	2_15372537_T_G	15372537	0	36	G	T	0.014	436664.2	61020.15	4.012093e-08	4.481637e-09	4.648295e-05
2	2_16080570_C_T	16080570	0	36	T	C	0.014	321853.0	80387.58	0.0003465485	0.0001315578	0.001525498
2	2_17959414_TATATATAC_T	17959414	0	36	T	TATATATAC	0.014	321853.0	80387.58	0.0003465485	0.0001315578	0.001525498
2	2_18758142_G_A	18758142	0	36	A	G	0.014	436664.2	61020.15	4.012093e-08	4.481637e-09	4.648295e-05
2	2_20320478_AAG_A	20320478	0	36	A	AAG	0.028	231936.7	59560.94	0.0004711466	0.0001863175	0.001812379
2	2_20320492_G_A	20320492	0	36	A	G	0.014	436664.2	61020.15	4.012093e-08	4.481637e-09	4.648295e-05
2	2_20870531_G_A	20870531	0	36	A	G	0.014	436664.2	61020.15	4.012093e-08	4.481637e-09	4.648295e-05
2	2_20870532_C_A	20870532	0	36	A	C	0.014	436664.2	61020.15	4.012093e-08	4.481637e-09	4.648295e-05
2	2_21225119_C_T	21225119	0	36	T	C	0.014	436664.2	61020.15	4.012093e-08	4.481637e-09	4.648295e-05
2	2_23980698_T_C	23980698	0	36	C	T	0.028	229399.0	59570.43	0.0005314595	0.000213559	0.00194166
2	2_24253662_A_G	24253662	0	36	G	A	0.014	321853.0	80387.58	0.0003465485	0.0001315578	0.001525498
2	2_24345213_C_A	24345213	0	36	A	C	0.014	436664.2	61020.15	4.012093e-08	4.481637e-09	4.648295e-05
2	2_24398454_T_A	24398454	0	36	A	T	0.028	229399.0	59570.43	0.0005314595	0.000213559	0.00194166
2	2_24398455_G_A	24398455	0	36	A	G	0.028	229399.0	59570.43	0.0005314595	0.000213559	0.00194166
2	2_25095370_C_T	25095370	0	36	T	C	0.014	321853.0	80387.58	0.0003465485	0.0001315578	0.001525498
2	2_25141982_C_G	25141982	0	36	G	C	0.014	321853.0	80387.58	0.0003465485	0.0001315578	0.001525498
2	2_25353483_T_G	25353483	0	36	G	T	0.028	223410.5	59629.74	0.0007095927	0.0002962867	0.002297936
2	2_25359545_C_G	25359545	0	36	G	C	0.014	436664.2	61020.15	4.012093e-08	4.481637e-09	4.648295e-05
2	2_25375238_C_T	25375238	0	36	T	C	0.014	436664.2	61020.15	4.012093e-08	4.481637e-09	4.648295e-05
2	2_25376564_CGT_C	25376564	0	36	C	CGT	0.014	436664.2	61020.15	4.012093e-08	4.481637e-09	4.648295e-05
2	2_25384169_G_A	25384169	0	36	A	G	0.014	436664.2	61020.15	4.012093e-08	4.481637e-09	4.648295e-05
2	2_25384472_G_A	25384472	0	36	A	G	0.014	436664.2	61020.15	4.012093e-08	4.481637e-09	4.648295e-05
2	2_25656889_GT_G	25656889	0	36	G	GT	0.014	321853.0	80387.58	0.0003465485	0.0001315578	0.001525498
2	2_25965095_G_T	25965095	0	36	T	G	0.014	321853.0	80387.58	0.0003465485	0.0001315578	0.001525498
2	2_26438188_C_G	26438188	0	36	G	C	0.014	321853.0	80387.58	0.0003465485	0.0001315578	0.001525498
2	2_26500101_CTT_C	26500101	0	36	C	CTT	0.014	436664.2	61020.15	4.012093e-08	4.481637e-09	4.648295e-05
2	2_26534454_G_A	26534454	0	36	A	G	0.028	223410.5	59629.74	0.0007095927	0.0002962867	0.002297936
2	2_26676467_G_A	26676467	0	36	A	G	0.014	321853.0	80387.58	0.0003465485	0.0001315578	0.001525498
2	2_26688572_G_A	26688572	0	36	A	G	0.014	436664.2	61020.15	4.012093e-08	4.481637e-09	4.648295e-05
2	2_26695192_C_T	26695192	0	36	T	C	0.014	436664.2	61020.15	4.012093e-08	4.481637e-09	4.648295e-05
2	2_26712405_G_C	26712405	0	36	C	G	0.014	436664.2	61020.15	4.012093e-08	4.481637e-09	4.648295e-05
2	2_27306455_C_T	27306455	0	36	T	C	0.014	321853.0	80387.58	0.0003465485	0.0001315578	0.001525498
2	2_27429808_G_A	27429808	0	36	A	G	0.014	321853.0	80387.58	0.0003465485	0.0001315578	0.001525498
2	2_27439872_A_G	27439872	0	36	G	A	0.014	436664.2	61020.15	4.012093e-08	4.481637e-09	4.648295e-05
2	2_27448425_G_C	27448425	0	36	C	G	0.014	321853.0	80387.58	0.0003465485	0.0001315578	0.001525498
2	2_27448426_A_C	27448426	0	36	C	A	0.014	321853.0	80387.58	0.0003465485	0.0001315578	0.001525498
2	2_27448430_T_C	27448430	0	36	C	T	0.014	321853.0	80387.58	0.0003465485	0.0001315578	0.001525498
2	2_27499675_G_A	27499675	0	36	A	G	0.014	321853.0	80387.58	0.0003465485	0.0001315578	0.001525498
2	2_27596232_T_C	27596232	0	36	C	T	0.014	321853.0	80387.58	0.0003465485	0.0001315578	0.001525498
2	2_27600814_G_A	27600814	0	36	A	G	0.014	321853.0	80387.58	0.0003465485	0.0001315578	0.001525498
2	2_27708053_G_T	27708053	0	36	T	G	0.014	436664.2	61020.15	4.012093e-08	4.481637e-09	4.648295e-05
2	2_27717575_A_C	27717575	0	36	C	A	0.014	436664.2	61020.15	4.012093e-08	4.481637e-09	4.648295e-05
2	2_27730169_C_CA	27730169	0	36	CA	C	0.014	321853.0	80387.58	0.0003465485	0.0001315578	0.001525498
2	2_27804357_GGTCCCTCTCAGAGAAGACATCACA_G	27804357	0	36	G	GGTCCCTCTCAGAGAAGACATCACA	0.014	321853.0	80387.58	0.0003465485	0.0001315578	0.001525498
2	2_27851282_C_G	27851282	0	36	G	C	0.014	321853.0	80387.58	0.0003465485	0.0001315578	0.001525498
2	2_27852389_C_T	27852389	0	36	T	C	0.014	321853.0	80387.58	0.0003465485	0.0001315578	0.001525498
2	2_27853687_C_G	27853687	0	36	G	C	0.014	321853.0	80387.58	0.0003465485	0.0001315578	0.001525498
2	2_27853982_C_G	27853982	0	36	G	C	0.014	321853.0	80387.58	0.0003465485	0.0001315578	0.001525498
2	2_27870853_T_C	27870853	0	36	C	T	0.014	321853.0	80387.58	0.0003465485	0.0001315578	0.001525498
2	2_28268742_C_T	28268742	0	36	T	C	0.014	436664.2	61020.15	4.012093e-08	4.481637e-09	4.648295e-05
2	2_28765918_G_T	28765918	0	36	T	G	0.014	436664.2	61020.15	4.012093e-08	4.481637e-09	4.648295e-05
2	2_28802473_C_G	28802473	0	36	G	C	0.028	221339.5	59665.9	0.0007857847	0.0003325639	0.002441285
2	2_28805465_G_A	28805465	0	36	A	G	0.014	436664.2	61020.15	4.012093e-08	4.481637e-09	4.648295e-05
2	2_28814349_T_C	28814349	0	36	C	T	0.014	436664.2	61020.15	4.012093e-08	4.481637e-09	4.648295e-05
2	2_28814460_T_A	28814460	0	36	A	T	0.014	436664.2	61020.15	4.012093e-08	4.481637e-09	4.648295e-05
2	2_29149282_C_CT	29149282	0	36	CT	C	0.014	321853.0	80387.58	0.0003465485	0.0001315578	0.001525498
2	2_29149970_G_C	29149970	0	36	C	G	0.014	321853.0	80387.58	0.0003465485	0.0001315578	0.001525498
2	2_29152588_G_A	29152588	0	36	A	G	0.014	321853.0	80387.58	0.0003465485	0.0001315578	0.001525498
2	2_29225463_C_T	29225463	0	36	T	C	0.014	321853.0	80387.58	0.0003465485	0.0001315578	0.001525498
2	2_29226245_G_A	29226245	0	36	A	G	0.028	223410.5	59629.74	0.0007095927	0.0002962867	0.002297936
2	2_29226389_A_G	29226389	0	36	G	A	0.014	436664.2	61020.15	4.012093e-08	4.481637e-09	4.648295e-05
2	2_29226417_C_T	29226417	0	36	T	C	0.014	436664.2	61020.15	4.012093e-08	4.481637e-09	4.648295e-05
2	2_29354079_T_C	29354079	0	36	C	T	0.014	436664.2	61020.15	4.012093e-08	4.481637e-09	4.648295e-05
2	2_29436976_C_T	29436976	0	36	T	C	0.014	321853.0	80387.58	0.0003465485	0.0001315578	0.001525498
2	2_29519623_G_C	29519623	0	36	C	G	0.014	321853.0	80387.58	0.0003465485	0.0001315578	0.001525498
2	2_29543826_C_T	29543826	0	36	T	C	0.014	436664.2	61020.15	4.012093e-08	4.481637e-09	4.648295e-05
2	2_30961328_T_C	30961328	0	36	C	T	0.014	436664.2	61020.15	4.012093e-08	4.481637e-09	4.648295e-05
2	2_30968161_C_T	30968161	0	36	T	C	0.014	436664.2	61020.15	4.012093e-08	4.481637e-09	4.648295e-05
2	2_31403862_C_G	31403862	0	36	G	C	0.014	321853.0	80387.58	0.0003465485	0.0001315578	0.001525498
2	2_31412642_T_C	31412642	0	36	C	T	0.014	436664.2	61020.15	4.012093e-08	4.481637e-09	4.648295e-05
2	2_32422934_C_G	32422934	0	36	G	C	0.014	436664.2	61020.15	4.012093e-08	4.481637e-09	4.648295e-05
2	2_32463355_G_A	32463355	0	36	A	G	0.014	321853.0	80387.58	0.0003465485	0.0001315578	0.001525498
2	2_32754651_A_C	32754651	0	36	C	A	0.014	321853.0	80387.58	0.0003465485	0.0001315578	0.001525498
2	2_32860251_CTAG_C	32860251	0	36	C	CTAG	0.014	436664.2	61020.15	4.012093e-08	4.481637e-09	4.648295e-05
2	2_32860257_T_C	32860257	0	36	C	T	0.014	436664.2	61020.15	4.012093e-08	4.481637e-09	4.648295e-05
2	2_33586486_C_T	33586486	0	36	T	C	0.028	208174.8	61334.78	0.001851996	0.0008777182	0.004155191
2	2_36781326_C_T	36781326	0	36	T	C	0.014	436664.2	61020.15	4.012093e-08	4.481637e-09	4.648295e-05
2	2_36785459_T_C	36785459	0	36	C	T	0.042	184892.5	53332.0	0.001523248	0.0007035839	0.003667042
2	2_37002043_A_G	37002043	0	36	G	A	0.014	436664.2	61020.15	4.012093e-08	4.481637e-09	4.648295e-05
2	2_37010557_G_T	37010557	0	36	T	G	0.014	321853.0	80387.58	0.0003465485	0.0001315578	0.001525498
2	2_37229453_G_A	37229453	0	36	A	G	0.014	436664.2	61020.15	4.012093e-08	4.481637e-09	4.648295e-05
2	2_37283844_G_A	37283844	0	36	A	G	0.028	208173.6	61339.8	0.001853476	0.0008785118	0.004157334
2	2_37299499_T_A	37299499	0	36	A	T	0.028	208173.6	61339.8	0.001853476	0.0008785118	0.004157334
2	2_37306340_T_C	37306340	0	36	C	T	0.028	208173.6	61339.8	0.001853476	0.0008785118	0.004157334
2	2_37315648_G_T	37315648	0	36	T	G	0.014	321853.0	80387.58	0.0003465485	0.0001315578	0.001525498
2	2_37317063_T_A	37317063	0	36	A	T	0.028	208173.6	61339.8	0.001853476	0.0008785118	0.004157334
2	2_37317162_G_A	37317162	0	36	A	G	0.028	208173.6	61339.8	0.001853476	0.0008785118	0.004157334
2	2_37319156_A_C	37319156	0	36	C	A	0.028	208173.6	61339.8	0.001853476	0.0008785118	0.004157334
2	2_37319495_TTATA_T	37319495	0	36	T	TTATA	0.028	208173.6	61339.8	0.001853476	0.0008785118	0.004157334
2	2_37321568_G_T	37321568	0	36	T	G	0.028	208173.6	61339.8	0.001853476	0.0008785118	0.004157334
2	2_37366688_T_C	37366688	0	36	C	T	0.028	208171.6	61328.22	0.001850456	0.0008768922	0.004152961
2	2_37368567_C_A	37368567	0	36	A	C	0.028	208171.6	61328.22	0.001850456	0.0008768922	0.004152961
2	2_37373897_G_C	37373897	0	36	C	G	0.028	208171.6	61328.22	0.001850456	0.0008768922	0.004152961
2	2_37374772_C_T	37374772	0	36	T	C	0.028	208171.6	61328.22	0.001850456	0.0008768922	0.004152961
2	2_37402225_C_T	37402225	0	36	T	C	0.028	208171.6	61328.22	0.001850456	0.0008768922	0.004152961
2	2_37402232_G_C	37402232	0	36	C	G	0.028	208171.6	61328.22	0.001850456	0.0008768922	0.004152961
2	2_37402356_C_G	37402356	0	36	G	C	0.028	208171.6	61328.22	0.001850456	0.0008768922	0.004152961
2	2_37410554_G_A	37410554	0	36	A	G	0.028	208171.6	61328.22	0.001850456	0.0008768922	0.004152961
2	2_37410693_G_A	37410693	0	36	A	G	0.028	208171.6	61328.22	0.001850456	0.0008768922	0.004152961
2	2_37414548_T_C	37414548	0	36	C	T	0.028	208171.6	61328.22	0.001850456	0.0008768922	0.004152961
2	2_37414586_A_T	37414586	0	36	T	A	0.028	208171.6	61328.22	0.001850456	0.0008768922	0.004152961
2	2_37415603_C_T	37415603	0	36	T	C	0.028	208171.6	61328.22	0.001850456	0.0008768922	0.004152961
2	2_37439334_C_G	37439334	0	36	G	C	0.028	208171.6	61328.22	0.001850456	0.0008768922	0.004152961
2	2_37458811_CA_C	37458811	0	36	C	CA	0.028	208171.6	61328.22	0.001850456	0.0008768922	0.004152961
2	2_37458813_G_C	37458813	0	36	C	G	0.028	208171.6	61328.22	0.001850456	0.0008768922	0.004152961
2	2_37465055_T_G	37465055	0	36	G	T	0.028	208171.6	61328.22	0.001850456	0.0008768922	0.004152961
2	2_37474341_C_T	37474341	0	36	T	C	0.014	436664.2	61020.15	4.012093e-08	4.481637e-09	4.648295e-05
2	2_37487570_AAC_A	37487570	0	36	A	AAC	0.014	436664.2	61020.15	4.012093e-08	4.481637e-09	4.648295e-05
2	2_37501547_A_G	37501547	0	36	G	A	0.014	436664.2	61020.15	4.012093e-08	4.481637e-09	4.648295e-05
2	2_37543593_A_G	37543593	0	36	G	A	0.014	436664.2	61020.15	4.012093e-08	4.481637e-09	4.648295e-05
2	2_37594316_A_G	37594316	0	36	G	A	0.014	436664.2	61020.15	4.012093e-08	4.481637e-09	4.648295e-05
2	2_37594594_G_A	37594594	0	36	A	G	0.014	436664.2	61020.15	4.012093e-08	4.481637e-09	4.648295e-05
2	2_38545794_G_C	38545794	0	36	C	G	0.014	436664.2	61020.15	4.012093e-08	4.481637e-09	4.648295e-05
2	2_38830131_G_A	38830131	0	36	A	G	0.028	225828.7	59591.41	0.0006300296	0.0002589499	0.002142905
2	2_39664010_C_T	39664010	0	36	T	C	0.056	144637.2	32305.12	9.013723e-05	2.858334e-05	0.0007560573
2	2_42483813_G_T	42483813	0	36	T	G	0.014	436664.2	61020.15	4.012093e-08	4.481637e-09	4.648295e-05
2	2_42579820_G_T	42579820	0	36	T	G	0.014	436664.2	61020.15	4.012093e-08	4.481637e-09	4.648295e-05
2	2_42990937_G_A	42990937	0	36	A	G	0.014	436664.2	61020.15	4.012093e-08	4.481637e-09	4.648295e-05
2	2_43871779_A_T	43871779	0	36	T	A	0.028	244155.6	56852.03	0.0001520563	5.17149e-05	0.0009831386
2	2_44036892_G_C	44036892	0	36	C	G	0.014	436664.2	61020.15	4.012093e-08	4.481637e-09	4.648295e-05
2	2_44079434_A_G	44079434	0	36	G	A	0.014	436664.2	61020.15	4.012093e-08	4.481637e-09	4.648295e-05
2	2_44144982_G_C	44144982	0	36	C	G	0.014	321853.0	80387.58	0.0003465485	0.0001315578	0.001525498
2	2_44172636_T_C	44172636	0	36	C	T	0.028	208174.9	61332.04	0.001851238	0.0008773119	0.004154094
2	2_44174968_T_A	44174968	0	36	A	T	0.028	208174.9	61332.04	0.001851238	0.0008773119	0.004154094
2	2_44186257_GGAT_G	44186257	0	36	G	GGAT	0.014	436664.2	61020.15	4.012093e-08	4.481637e-09	4.648295e-05
2	2_44223246_C_T	44223246	0	36	T	C	0.014	436664.2	61020.15	4.012093e-08	4.481637e-09	4.648295e-05
2	2_44539773_T_C	44539773	0	36	C	T	0.014	436664.2	61020.15	4.012093e-08	4.481637e-09	4.648295e-05
2	2_44548839_G_A	44548839	0	36	A	G	0.014	321853.0	80387.58	0.0003465485	0.0001315578	0.001525498
2	2_44549869_C_A	44549869	0	36	A	C	0.014	436664.2	61020.15	4.012093e-08	4.481637e-09	4.648295e-05
2	2_44559583_G_A	44559583	0	36	A	G	0.014	321853.0	80387.58	0.0003465485	0.0001315578	0.001525498
2	2_45169612_G_A	45169612	0	36	A	G	0.014	321853.0	80387.58	0.0003465485	0.0001315578	0.001525498
2	2_45233542_C_T	45233542	0	36	T	C	0.014	321853.0	80387.58	0.0003465485	0.0001315578	0.001525498
2	2_45806934_A_G	45806934	0	36	G	A	0.014	436664.2	61020.15	4.012093e-08	4.481637e-09	4.648295e-05
2	2_46228514_A_C	46228514	0	36	C	A	0.014	321853.0	80387.58	0.0003465485	0.0001315578	0.001525498
2	2_46228703_G_C	46228703	0	36	C	G	0.014	321853.0	80387.58	0.0003465485	0.0001315578	0.001525498
2	2_46372407_G_A	46372407	0	36	A	G	0.014	436664.2	61020.15	4.012093e-08	4.481637e-09	4.648295e-05
2	2_46583283_T_C	46583283	0	36	C	T	0.014	321853.0	80387.58	0.0003465485	0.0001315578	0.001525498
2	2_46583284_T_C	46583284	0	36	C	T	0.014	321853.0	80387.58	0.0003465485	0.0001315578	0.001525498
2	2_46583285_T_C	46583285	0	36	C	T	0.014	321853.0	80387.58	0.0003465485	0.0001315578	0.001525498
2	2_47083046_T_A	47083046	0	36	A	T	0.014	321853.0	80387.58	0.0003465485	0.0001315578	0.001525498
2	2_47144394_C_G	47144394	0	36	G	C	0.028	208173.6	61339.8	0.001853476	0.0008785118	0.004157334
2	2_47378702_C_T	47378702	0	36	T	C	0.014	321853.0	80387.58	0.0003465485	0.0001315578	0.001525498
2	2_47607186_T_C	47607186	0	36	C	T	0.014	436664.2	61020.15	4.012093e-08	4.481637e-09	4.648295e-05
2	2_47656871_T_C	47656871	0	36	C	T	0.014	436664.2	61020.15	4.012093e-08	4.481637e-09	4.648295e-05
2	2_49003538_G_A	49003538	0	36	A	G	0.014	321853.0	80387.58	0.0003465485	0.0001315578	0.001525498
2	2_53978003_T_C	53978003	0	36	C	T	0.014	321853.0	80387.58	0.0003465485	0.0001315578	0.001525498
2	2_54042122_AT_A	54042122	0	36	A	AT	0.014	436664.2	61020.15	4.012093e-08	4.481637e-09	4.648295e-05
2	2_54587378_C_G	54587378	0	36	G	C	0.083	154316.6	38255.26	0.0003184125	0.0001195213	0.001455939
2	2_55047673_G_A	55047673	0	36	A	G	0.014	436664.2	61020.15	4.012093e-08	4.481637e-09	4.648295e-05
2	2_55433306_G_T	55433306	0	36	T	G	0.014	321853.0	80387.58	0.0003465485	0.0001315578	0.001525498
2	2_55544736_T_C	55544736	0	36	C	T	0.014	321853.0	80387.58	0.0003465485	0.0001315578	0.001525498
2	2_55894243_G_A	55894243	0	36	A	G	0.028	208157.4	61270.85	0.001835922	0.0008691033	0.00413189
2	2_58425892_C_T	58425892	0	36	T	C	0.014	436664.2	61020.15	4.012093e-08	4.481637e-09	4.648295e-05
2	2_61336523_T_C	61336523	0	36	C	T	0.083	129631.8	38510.95	0.001995755	0.0009551902	0.004361313
2	2_62104461_T_A	62104461	0	36	A	T	0.014	321853.0	80387.58	0.0003465485	0.0001315578	0.001525498
2	2_63175759_A_G	63175759	0	36	G	A	0.014	321853.0	80387.58	0.0003465485	0.0001315578	0.001525498
2	2_63272663_A_C	63272663	0	36	C	A	0.014	436664.2	61020.15	4.012093e-08	4.481637e-09	4.648295e-05
2	2_64082654_GTTTT_G	64082654	0	36	G	GTTTT	0.097	101322.0	30864.17	0.002489894	0.001226799	0.005043189
2	2_64202180_A_AT	64202180	0	36	AT	A	0.028	208157.4	61270.85	0.001835922	0.0008691033	0.00413189
2	2_64796676_C_G	64796676	0	36	G	C	0.014	436664.2	61020.15	4.012093e-08	4.481637e-09	4.648295e-05
2	2_64806563_C_T	64806563	0	36	T	C	0.014	321853.0	80387.58	0.0003465485	0.0001315578	0.001525498
2	2_65593439_A_AAACAACAACAAC	65593439	0	36	AAACAACAACAAC	A	0.181	91727.36	26344.89	0.001462961	0.0006721515	0.003574561
2	2_66795964_C_T	66795964	0	36	T	C	0.014	436664.2	61020.15	4.012093e-08	4.481637e-09	4.648295e-05
2	2_68269974_G_T	68269974	0	36	T	G	0.014	436664.2	61020.15	4.012093e-08	4.481637e-09	4.648295e-05
2	2_68272922_C_T	68272922	0	36	T	C	0.014	321853.0	80387.58	0.0003465485	0.0001315578	0.001525498
2	2_68364611_T_A	68364611	0	36	A	T	0.014	436664.2	61020.15	4.012093e-08	4.481637e-09	4.648295e-05
2	2_68740430_G_T	68740430	0	36	T	G	0.014	436664.2	61020.15	4.012093e-08	4.481637e-09	4.648295e-05
2	2_68882661_A_G	68882661	0	36	G	A	0.028	221560.8	58687.11	0.0006555339	0.0002708543	0.002193252
2	2_69172588_A_G	69172588	0	36	G	A	0.014	321853.0	80387.58	0.0003465485	0.0001315578	0.001525498
2	2_69626359_AG_A	69626359	0	36	A	AG	0.014	436664.2	61020.15	4.012093e-08	4.481637e-09	4.648295e-05
2	2_70223879_C_T	70223879	0	36	T	C	0.014	321853.0	80387.58	0.0003465485	0.0001315578	0.001525498
2	2_70678100_A_T	70678100	0	36	T	A	0.028	221562.4	58684.8	0.0006552156	0.0002707054	0.002192628
2	2_70683714_T_C	70683714	0	36	C	T	0.028	221562.4	58684.8	0.0006552156	0.0002707054	0.002192628
2	2_70890806_C_T	70890806	0	36	T	C	0.014	321853.0	80387.58	0.0003465485	0.0001315578	0.001525498
2	2_70922885_C_G	70922885	0	36	G	C	0.014	436664.2	61020.15	4.012093e-08	4.481637e-09	4.648295e-05
2	2_71043457_C_A	71043457	0	36	A	C	0.014	436664.2	61020.15	4.012093e-08	4.481637e-09	4.648295e-05
2	2_71627208_T_C	71627208	0	36	C	T	0.014	436664.2	61020.15	4.012093e-08	4.481637e-09	4.648295e-05
2	2_71660488_G_A	71660488	0	36	A	G	0.014	321853.0	80387.58	0.0003465485	0.0001315578	0.001525498
2	2_71661946_A_T	71661946	0	36	T	A	0.014	321853.0	80387.58	0.0003465485	0.0001315578	0.001525498
2	2_71762413_G_A	71762413	0	36	A	G	0.028	221575.6	58618.45	0.0006471075	0.0002669143	0.002176689
2	2_71776366_A_G	71776366	0	36	G	A	0.014	321853.0	80387.58	0.0003465485	0.0001315578	0.001525498
2	2_71817452_G_T	71817452	0	36	T	G	0.014	321853.0	80387.58	0.0003465485	0.0001315578	0.001525498
2	2_73151231_C_T	73151231	0	36	T	C	0.972	-221560.9	58683.75	0.000655138	0.000270669	0.002192476
2	2_73268663_A_G	73268663	0	36	G	A	0.014	321853.0	80387.58	0.0003465485	0.0001315578	0.001525498
2	2_73460517_T_G	73460517	0	36	G	T	0.014	321853.0	80387.58	0.0003465485	0.0001315578	0.001525498
2	2_73676961_C_G	73676961	0	36	G	C	0.014	436664.2	61020.15	4.012093e-08	4.481637e-09	4.648295e-05
2	2_73679956_C_T	73679956	0	36	T	C	0.014	436664.2	61020.15	4.012093e-08	4.481637e-09	4.648295e-05
2	2_73900090_G_T	73900090	0	36	T	G	0.014	321853.0	80387.58	0.0003465485	0.0001315578	0.001525498
2	2_74135628_G_A	74135628	0	36	A	G	0.014	436664.2	61020.15	4.012093e-08	4.481637e-09	4.648295e-05
2	2_74274329_C_T	74274329	0	36	T	C	0.028	208170.5	61305.18	0.001844241	0.000873561	0.004143957
2	2_74643215_C_T	74643215	0	36	T	C	0.014	436664.2	61020.15	4.012093e-08	4.481637e-09	4.648295e-05
2	2_74752226_C_T	74752226	0	36	T	C	0.014	321853.0	80387.58	0.0003465485	0.0001315578	0.001525498
2	2_74890176_C_T	74890176	0	36	T	C	0.014	436664.2	61020.15	4.012093e-08	4.481637e-09	4.648295e-05
2	2_75109285_C_T	75109285	0	36	T	C	0.014	321853.0	80387.58	0.0003465485	0.0001315578	0.001525498
2	2_75882177_TAA_T	75882177	0	36	T	TAA	0.014	321853.0	80387.58	0.0003465485	0.0001315578	0.001525498
2	2_77748603_T_C	77748603	0	36	C	T	0.014	436664.2	61020.15	4.012093e-08	4.481637e-09	4.648295e-05
2	2_79348196_G_T	79348196	0	36	T	G	0.236	79539.49	20892.87	0.0006003618	0.000245182	0.002083498
2	2_80874623_A_T	80874623	0	36	T	A	0.014	321853.0	80387.58	0.0003465485	0.0001315578	0.001525498
2	2_84851978_T_A	84851978	0	36	A	T	0.014	321853.0	80387.58	0.0003465485	0.0001315578	0.001525498
2	2_85510530_G_A	85510530	0	36	A	G	0.014	436664.2	61020.15	4.012093e-08	4.481637e-09	4.648295e-05
2	2_85531116_C_T	85531116	0	36	T	C	0.028	400526.3	10158.92	1.061351e-28	2.042744e-32	1.294467e-06
2	2_85554906_T_TG	85554906	0	36	TG	T	0.028	208174.0	61337.64	0.001852848	0.0008781754	0.004156425
2	2_85626333_G_A	85626333	0	36	A	G	0.014	436664.2	61020.15	4.012093e-08	4.481637e-09	4.648295e-05
2	2_86364582_T_C	86364582	0	36	C	T	0.014	436664.2	61020.15	4.012093e-08	4.481637e-09	4.648295e-05
2	2_86682409_TC_T	86682409	0	36	T	TC	0.014	321853.0	80387.58	0.0003465485	0.0001315578	0.001525498
2	2_87017519_T_C	87017519	0	36	C	T	0.014	321853.0	80387.58	0.0003465485	0.0001315578	0.001525498
2	2_87018022_C_G	87018022	0	36	G	C	0.014	436664.2	61020.15	4.012093e-08	4.481637e-09	4.648295e-05
2	2_87204970_G_T	87204970	0	36	T	G	0.014	321853.0	80387.58	0.0003465485	0.0001315578	0.001525498
2	2_87391687_A_G	87391687	0	36	G	A	0.014	321853.0	80387.58	0.0003465485	0.0001315578	0.001525498
2	2_87620353_G_A	87620353	0	36	A	G	0.542	116996.5	32022.5	0.0009166897	0.0003959603	0.002677888
2	2_88019400_G_C	88019400	0	36	C	G	0.014	321853.0	80387.58	0.0003465485	0.0001315578	0.001525498
2	2_88285288_G_A	88285288	0	36	A	G	0.014	321853.0	80387.58	0.0003465485	0.0001315578	0.001525498
2	2_89111857_C_T	89111857	0	36	T	C	0.028	208163.7	61322.74	0.001849597	0.0008764316	0.004151716
2	2_89161072_T_C	89161072	0	36	C	T	0.028	221560.9	58683.75	0.000655138	0.000270669	0.002192476
2	2_89568139_A_C	89568139	0	36	C	A	0.014	436664.2	61020.15	4.012093e-08	4.481637e-09	4.648295e-05
2	2_91962963_A_G	91962963	0	36	G	A	0.014	321853.0	80387.58	0.0003465485	0.0001315578	0.001525498
2	2_91962971_T_C	91962971	0	36	C	T	0.014	321853.0	80387.58	0.0003465485	0.0001315578	0.001525498
2	2_92075610_G_C	92075610	0	36	C	G	0.028	208186.3	61328.14	0.001849249	0.0008762456	0.004151214
2	2_95537886_G_A	95537886	0	36	A	G	0.014	436664.2	61020.15	4.012093e-08	4.481637e-09	4.648295e-05
2	2_95542242_T_C	95542242	0	36	C	T	0.014	436664.2	61020.15	4.012093e-08	4.481637e-09	4.648295e-05
2	2_95783370_T_C	95783370	0	36	C	T	0.014	436664.2	61020.15	4.012093e-08	4.481637e-09	4.648295e-05
2	2_96561406_A_G	96561406	0	36	G	A	0.028	223410.5	59629.74	0.0007095927	0.0002962867	0.002297936
2	2_96568915_T_C	96568915	0	36	C	T	0.014	321853.0	80387.58	0.0003465485	0.0001315578	0.001525498
2	2_96601414_T_C	96601414	0	36	C	T	0.028	221560.8	58687.11	0.0006555339	0.0002708543	0.002193252
2	2_97164978_C_T	97164978	0	36	T	C	0.014	436664.2	61020.15	4.012093e-08	4.481637e-09	4.648295e-05
2	2_97353489_G_A	97353489	0	36	A	G	0.014	436664.2	61020.15	4.012093e-08	4.481637e-09	4.648295e-05
2	2_97465375_G_A	97465375	0	36	A	G	0.014	321853.0	80387.58	0.0003465485	0.0001315578	0.001525498
2	2_97482487_C_T	97482487	0	36	T	C	0.014	436664.2	61020.15	4.012093e-08	4.481637e-09	4.648295e-05
2	2_97531315_C_T	97531315	0	36	T	C	0.014	436664.2	61020.15	4.012093e-08	4.481637e-09	4.648295e-05
2	2_97757290_C_T	97757290	0	36	T	C	0.014	321853.0	80387.58	0.0003465485	0.0001315578	0.001525498
2	2_97757296_C_T	97757296	0	36	T	C	0.014	321853.0	80387.58	0.0003465485	0.0001315578	0.001525498
2	2_98123468_T_G	98123468	0	36	G	T	0.028	208179.4	61352.55	0.001856499	0.0008801335	0.00416171
2	2_98166093_G_A	98166093	0	36	A	G	0.014	436664.2	61020.15	4.012093e-08	4.481637e-09	4.648295e-05
2	2_98175197_T_TC	98175197	0	36	TC	T	0.014	321853.0	80387.58	0.0003465485	0.0001315578	0.001525498
2	2_98175199_G_A	98175199	0	36	A	G	0.014	321853.0	80387.58	0.0003465485	0.0001315578	0.001525498
2	2_98263710_G_A	98263710	0	36	A	G	0.014	321853.0	80387.58	0.0003465485	0.0001315578	0.001525498
2	2_98373908_G_C	98373908	0	36	C	G	0.014	321853.0	80387.58	0.0003465485	0.0001315578	0.001525498
2	2_98376209_C_T	98376209	0	36	T	C	0.014	321853.0	80387.58	0.0003465485	0.0001315578	0.001525498
2	2_98524931_T_C	98524931	0	36	C	T	0.014	321853.0	80387.58	0.0003465485	0.0001315578	0.001525498
2	2_98810904_A_G	98810904	0	36	G	A	0.014	436664.2	61020.15	4.012093e-08	4.481637e-09	4.648295e-05
2	2_98833445_A_ACC	98833445	0	36	ACC	A	0.069	156786.9	38836.65	0.0003155394	0.0001182999	0.001448714
2	2_99234590_T_TA	99234590	0	36	TA	T	0.014	436664.2	61020.15	4.012093e-08	4.481637e-09	4.648295e-05
2	2_99439603_G_A	99439603	0	36	A	G	0.014	321853.0	80387.58	0.0003465485	0.0001315578	0.001525498
2	2_99443371_G_T	99443371	0	36	T	G	0.014	321853.0	80387.58	0.0003465485	0.0001315578	0.001525498
2	2_99485741_C_T	99485741	0	36	T	C	0.014	436664.2	61020.15	4.012093e-08	4.481637e-09	4.648295e-05
2	2_99771609_G_C	99771609	0	36	C	G	0.014	436664.2	61020.15	4.012093e-08	4.481637e-09	4.648295e-05
2	2_99779639_C_A	99779639	0	36	A	C	0.014	321853.0	80387.58	0.0003465485	0.0001315578	0.001525498
2	2_99858764_G_A	99858764	0	36	A	G	0.028	208186.3	61328.14	0.001849249	0.0008762456	0.004151214
2	2_100013179_A_T	100013179	0	36	T	A	0.014	436664.2	61020.15	4.012093e-08	4.481637e-09	4.648295e-05
2	2_100185487_A_G	100185487	0	36	G	A	0.014	321853.0	80387.58	0.0003465485	0.0001315578	0.001525498
2	2_100188910_G_C	100188910	0	36	C	G	0.014	321853.0	80387.58	0.0003465485	0.0001315578	0.001525498
2	2_101179322_A_G	101179322	0	36	G	A	0.014	436664.2	61020.15	4.012093e-08	4.481637e-09	4.648295e-05
2	2_101648715_A_G	101648715	0	36	G	A	0.014	321853.0	80387.58	0.0003465485	0.0001315578	0.001525498
2	2_102509363_A_T	102509363	0	36	T	A	0.028	208170.9	61319.67	0.001848169	0.0008756665	0.004149649
2	2_102957646_A_T	102957646	0	36	T	A	0.083	128367.5	37174.84	0.001580727	0.0007337036	0.003754286
2	2_103320930_C_T	103320930	0	36	T	C	0.028	221562.4	58684.8	0.0006552156	0.0002707054	0.002192628
2	2_103334983_G_C	103334983	0	36	C	G	0.028	221339.5	59665.9	0.0007857847	0.0003325639	0.002441285
2	2_103335178_C_T	103335178	0	36	T	C	0.028	221339.5	59665.9	0.0007857847	0.0003325639	0.002441285
2	2_103414475_T_C	103414475	0	36	C	T	0.028	221339.5	59665.9	0.0007857847	0.0003325639	0.002441285
2	2_105705628_A_G	105705628	0	36	G	A	0.014	436664.2	61020.15	4.012093e-08	4.481637e-09	4.648295e-05
2	2_105713689_G_A	105713689	0	36	A	G	0.014	321853.0	80387.58	0.0003465485	0.0001315578	0.001525498
2	2_106015412_G_C	106015412	0	36	C	G	0.014	321853.0	80387.58	0.0003465485	0.0001315578	0.001525498
2	2_106690557_G_A	106690557	0	36	A	G	0.014	321853.0	80387.58	0.0003465485	0.0001315578	0.001525498
2	2_106721401_G_A	106721401	0	36	A	G	0.014	321853.0	80387.58	0.0003465485	0.0001315578	0.001525498
2	2_106987354_T_C	106987354	0	36	C	T	0.014	436664.2	61020.15	4.012093e-08	4.481637e-09	4.648295e-05
2	2_106987501_C_T	106987501	0	36	T	C	0.014	436664.2	61020.15	4.012093e-08	4.481637e-09	4.648295e-05
2	2_106998695_T_A	106998695	0	36	A	T	0.028	208170.9	61319.67	0.001848169	0.0008756665	0.004149649
2	2_107044645_T_C	107044645	0	36	C	T	0.014	436664.2	61020.15	4.012093e-08	4.481637e-09	4.648295e-05
2	2_108869047_C_T	108869047	0	36	T	C	0.014	321853.0	80387.58	0.0003465485	0.0001315578	0.001525498
2	2_108872071_A_G	108872071	0	36	G	A	0.014	321853.0	80387.58	0.0003465485	0.0001315578	0.001525498
2	2_109089383_CAATT_C	109089383	0	36	C	CAATT	0.014	436664.2	61020.15	4.012093e-08	4.481637e-09	4.648295e-05
2	2_109103009_G_A	109103009	0	36	A	G	0.014	321853.0	80387.58	0.0003465485	0.0001315578	0.001525498
2	2_109104350_A_T	109104350	0	36	T	A	0.014	436664.2	61020.15	4.012093e-08	4.481637e-09	4.648295e-05
2	2_109116016_A_G	109116016	0	36	G	A	0.028	221575.6	58618.45	0.0006471075	0.0002669143	0.002176689
2	2_109522838_T_A	109522838	0	36	A	T	0.014	436664.2	61020.15	4.012093e-08	4.481637e-09	4.648295e-05
2	2_109547251_G_C	109547251	0	36	C	G	0.014	321853.0	80387.58	0.0003465485	0.0001315578	0.001525498
2	2_109745207_C_T	109745207	0	36	T	C	0.014	436664.2	61020.15	4.012093e-08	4.481637e-09	4.648295e-05
2	2_109745738_G_T	109745738	0	36	T	G	0.014	321853.0	80387.58	0.0003465485	0.0001315578	0.001525498
2	2_109746039_G_A	109746039	0	36	A	G	0.292	66629.79	20385.28	0.002585859	0.001280413	0.005171563
2	2_110066065_G_A	110066065	0	36	A	G	0.014	436664.2	61020.15	4.012093e-08	4.481637e-09	4.648295e-05
2	2_110920729_C_T	110920729	0	36	T	C	0.014	321853.0	80387.58	0.0003465485	0.0001315578	0.001525498
2	2_111881361_C_T	111881361	0	36	T	C	0.014	321853.0	80387.58	0.0003465485	0.0001315578	0.001525498
2	2_111887817_G_A	111887817	0	36	A	G	0.014	436664.2	61020.15	4.012093e-08	4.481637e-09	4.648295e-05
2	2_112656372_A_T	112656372	0	36	T	A	0.069	122825.7	32366.95	0.0006210678	0.0002547818	0.002125058
2	2_112686842_G_C	112686842	0	36	C	G	0.014	436664.2	61020.15	4.012093e-08	4.481637e-09	4.648295e-05
2	2_112754229_T_C	112754229	0	36	C	T	0.042	173531.1	32890.6	8.901252e-06	2.067229e-06	0.0002699865
2	2_112754471_C_T	112754471	0	36	T	C	0.028	218332.1	30510.07	4.012093e-08	4.481637e-09	4.648295e-05
2	2_112761369_G_A	112761369	0	36	A	G	0.042	173531.1	32890.6	8.901252e-06	2.067229e-06	0.0002699865
2	2_112779732_G_T	112779732	0	36	T	G	0.028	208174.0	61337.64	0.001852848	0.0008781754	0.004156425
2	2_112782371_G_A	112782371	0	36	A	G	0.028	208174.0	61337.64	0.001852848	0.0008781754	0.004156425
2	2_112813190_G_C	112813190	0	36	C	G	0.014	436664.2	61020.15	4.012093e-08	4.481637e-09	4.648295e-05
2	2_113033471_G_A	113033471	0	36	A	G	0.014	436664.2	61020.15	4.012093e-08	4.481637e-09	4.648295e-05
2	2_113074983_T_C	113074983	0	36	C	T	0.014	436664.2	61020.15	4.012093e-08	4.481637e-09	4.648295e-05
2	2_113180299_G_A	113180299	0	36	A	G	0.014	436664.2	61020.15	4.012093e-08	4.481637e-09	4.648295e-05
2	2_113514026_T_C	113514026	0	36	C	T	0.014	436664.2	61020.15	4.012093e-08	4.481637e-09	4.648295e-05
2	2_113958973_G_A	113958973	0	36	A	G	0.014	436664.2	61020.15	4.012093e-08	4.481637e-09	4.648295e-05
2	2_114201218_A_C	114201218	0	36	C	A	0.042	180391.1	53133.12	0.001847027	0.0008750538	0.004147993
2	2_114204924_T_C	114204924	0	36	C	T	0.014	436664.2	61020.15	4.012093e-08	4.481637e-09	4.648295e-05
2	2_114204962_G_A	114204962	0	36	A	G	0.014	436664.2	61020.15	4.012093e-08	4.481637e-09	4.648295e-05
2	2_114251463_A_G	114251463	0	36	G	A	0.014	321853.0	80387.58	0.0003465485	0.0001315578	0.001525498
2	2_114256978_A_C	114256978	0	36	C	A	0.167	77188.21	23059.51	0.002098073	0.001010778	0.004505693
2	2_114257354_A_G	114257354	0	36	G	A	0.056	197446.3	38405.17	1.318138e-05	3.227754e-06	0.0003170304
2	2_114340631_A_G	114340631	0	36	G	A	0.014	436664.2	61020.15	4.012093e-08	4.481637e-09	4.648295e-05
2	2_114340786_T_C	114340786	0	36	C	T	0.472	-225828.7	59591.41	0.0006300296	0.0002589499	0.002142905
2	2_114353399_T_G	114353399	0	36	G	T	0.486	-436664.2	61020.15	4.012093e-08	4.481637e-09	4.648295e-05
2	2_114476839_A_C	114476839	0	36	C	A	0.014	436664.2	61020.15	4.012093e-08	4.481637e-09	4.648295e-05
2	2_116283581_C_T	116283581	0	36	T	C	0.014	436664.2	61020.15	4.012093e-08	4.481637e-09	4.648295e-05
2	2_116283665_G_A	116283665	0	36	A	G	0.014	436664.2	61020.15	4.012093e-08	4.481637e-09	4.648295e-05
2	2_118850613_GAGGAGAGTTCTGTAGCTACTGAACCTTGCCAAAAGCAACCAGATGATGATGATGATGATGATGATGA_G	118850613	0	36	G	GAGGAGAGTTCTGTAGCTACTGAACCTTGCCAAAAGCAACCAGATGATGATGATGATGATGATGATGA	0.014	321853.0	80387.58	0.0003465485	0.0001315578	0.001525498
2	2_119700090_A_G	119700090	0	36	G	A	0.014	321853.0	80387.58	0.0003465485	0.0001315578	0.001525498
2	2_119726678_G_A	119726678	0	36	A	G	0.028	208167.9	61239.19	0.001826468	0.0008640413	0.004118161
2	2_119729014_T_C	119729014	0	36	C	T	0.014	321853.0	80387.58	0.0003465485	0.0001315578	0.001525498
2	2_122000114_G_A	122000114	0	36	A	G	0.028	244155.6	56852.03	0.0001520563	5.17149e-05	0.0009831386
2	2_122005699_G_A	122005699	0	36	A	G	0.028	244155.6	56852.03	0.0001520563	5.17149e-05	0.0009831386
2	2_122340075_GAGAA_G	122340075	0	36	G	GAGAA	0.014	321853.0	80387.58	0.0003465485	0.0001315578	0.001525498
2	2_122340211_A_AAGGGAGAGAG	122340211	0	36	AAGGGAGAGAG	A	0.014	321853.0	80387.58	0.0003465485	0.0001315578	0.001525498
2	2_125204576_A_T	125204576	0	36	T	A	0.014	436664.2	61020.15	4.012093e-08	4.481637e-09	4.648295e-05
2	2_125547807_A_C	125547807	0	36	C	A	0.014	436664.2	61020.15	4.012093e-08	4.481637e-09	4.648295e-05
2	2_127657277_C_T	127657277	0	36	T	C	0.014	436664.2	61020.15	4.012093e-08	4.481637e-09	4.648295e-05
2	2_128046489_A_G	128046489	0	36	G	A	0.014	436664.2	61020.15	4.012093e-08	4.481637e-09	4.648295e-05
2	2_128350578_T_TG	128350578	0	36	TG	T	0.972	-208170.5	61305.18	0.001844241	0.000873561	0.004143957
2	2_128389159_T_C	128389159	0	36	C	T	0.014	321853.0	80387.58	0.0003465485	0.0001315578	0.001525498
2	2_128415213_G_A	128415213	0	36	A	G	0.014	436664.2	61020.15	4.012093e-08	4.481637e-09	4.648295e-05
2	2_128459359_T_A	128459359	0	36	A	T	0.014	321853.0	80387.58	0.0003465485	0.0001315578	0.001525498
2	2_128744480_T_C	128744480	0	36	C	T	0.014	436664.2	61020.15	4.012093e-08	4.481637e-09	4.648295e-05
2	2_128747490_C_T	128747490	0	36	T	C	0.014	436664.2	61020.15	4.012093e-08	4.481637e-09	4.648295e-05
2	2_128860850_G_A	128860850	0	36	A	G	0.014	321853.0	80387.58	0.0003465485	0.0001315578	0.001525498
2	2_130899791_C_T	130899791	0	36	T	C	0.014	321853.0	80387.58	0.0003465485	0.0001315578	0.001525498
2	2_130900639_T_C	130900639	0	36	C	T	0.014	321853.0	80387.58	0.0003465485	0.0001315578	0.001525498
2	2_130952613_C_G	130952613	0	36	G	C	0.014	321853.0	80387.58	0.0003465485	0.0001315578	0.001525498
2	2_131220830_C_T	131220830	0	36	T	C	0.069	95978.93	29103.35	0.002392791	0.001172821	0.004912063
2	2_131221622_C_T	131221622	0	36	T	C	0.028	221562.2	58701.93	0.0006572218	0.0002716443	0.002196562
2	2_131256624_A_G	131256624	0	36	G	A	0.014	436664.2	61020.15	4.012093e-08	4.481637e-09	4.648295e-05
2	2_131266584_A_G	131266584	0	36	G	A	0.028	221562.2	58701.93	0.0006572218	0.0002716443	0.002196562
2	2_131266613_AGCACCACTTGCCCATCTTGCTCCTGAGTGTCTTCATAGTGGAGTCGTCCTGGTCTCCAGAAGTGCCCACGTTGCTCTTGCCGCTCCCCCTGCAGCAGGGGAAGCAGTGGCG_GGCACCACTTGCCCATCTTGCTCCTGAGTGTCTTCATAGTGGAGTCGTCCTGGTCTCCAGAAGTGCCCACGTTGCTCTTGCCGCTCCCCCTGCAGCAGGGGAAGCAGTGGCG	131266613	0	36	GGCACCACTTGCCCATCTTGCTCCTGAGTGTCTTCATAGTGGAGTCGTCCTGGTCTCCAGAAGTGCCCACGTTGCTCTTGCCGCTCCCCCTGCAGCAGGGGAAGCAGTGGCG	AGCACCACTTGCCCATCTTGCTCCTGAGTGTCTTCATAGTGGAGTCGTCCTGGTCTCCAGAAGTGCCCACGTTGCTCTTGCCGCTCCCCCTGCAGCAGGGGAAGCAGTGGCG	0.014	436664.2	61020.15	4.012093e-08	4.481637e-09	4.648295e-05
2	2_131671572_G_T	131671572	0	36	T	G	0.014	436664.2	61020.15	4.012093e-08	4.481637e-09	4.648295e-05
2	2_131829388_C_A	131829388	0	36	A	C	0.014	321853.0	80387.58	0.0003465485	0.0001315578	0.001525498
2	2_131976529_G_T	131976529	0	36	T	G	0.014	321853.0	80387.58	0.0003465485	0.0001315578	0.001525498
2	2_131984410_A_G	131984410	0	36	G	A	0.028	208174.8	61334.78	0.001851996	0.0008777182	0.004155191
2	2_132111129_G_C	132111129	0	36	C	G	0.014	436664.2	61020.15	4.012093e-08	4.481637e-09	4.648295e-05
2	2_132200136_C_A	132200136	0	36	A	C	0.139	89912.33	24931.62	0.001043104	0.0004583269	0.002896788
2	2_132200256_T_C	132200256	0	36	C	T	0.139	89912.33	24931.62	0.001043104	0.0004583269	0.002896788
2	2_132200307_G_A	132200307	0	36	A	G	0.139	89912.33	24931.62	0.001043104	0.0004583269	0.002896788
2	2_132200345_C_T	132200345	0	36	T	C	0.111	106380.0	26360.79	0.0003169149	0.0001188844	0.001452176
2	2_132200529_A_G	132200529	0	36	G	A	0.139	89912.33	24931.62	0.001043104	0.0004583269	0.002896788
2	2_132200935_C_T	132200935	0	36	T	C	0.139	89912.33	24931.62	0.001043104	0.0004583269	0.002896788
2	2_132200984_G_A	132200984	0	36	A	G	0.139	89912.33	24931.62	0.001043104	0.0004583269	0.002896788
2	2_132200995_C_T	132200995	0	36	T	C	0.139	89912.33	24931.62	0.001043104	0.0004583269	0.002896788
2	2_132201288_A_G	132201288	0	36	G	A	0.139	89912.33	24931.62	0.001043104	0.0004583269	0.002896788
2	2_132201468_G_A	132201468	0	36	A	G	0.111	106380.0	26360.79	0.0003169149	0.0001188844	0.001452176
2	2_132201582_A_G	132201582	0	36	G	A	0.139	89912.33	24931.62	0.001043104	0.0004583269	0.002896788
2	2_132201718_T_C	132201718	0	36	C	T	0.139	89912.33	24931.62	0.001043104	0.0004583269	0.002896788
2	2_132201736_C_G	132201736	0	36	G	C	0.139	89912.33	24931.62	0.001043104	0.0004583269	0.002896788
2	2_132201862_C_G	132201862	0	36	G	C	0.139	89912.33	24931.62	0.001043104	0.0004583269	0.002896788
2	2_132201889_C_A	132201889	0	36	A	C	0.139	89912.33	24931.62	0.001043104	0.0004583269	0.002896788
2	2_132201930_T_C	132201930	0	36	C	T	0.139	89912.33	24931.62	0.001043104	0.0004583269	0.002896788
2	2_132202050_T_C	132202050	0	36	C	T	0.139	89912.33	24931.62	0.001043104	0.0004583269	0.002896788
2	2_132288315_G_A	132288315	0	36	A	G	0.014	321853.0	80387.58	0.0003465485	0.0001315578	0.001525498
2	2_133175524_G_A	133175524	0	36	A	G	0.083	128809.6	37054.99	0.001485304	0.0006837812	0.003608955
2	2_133541624_C_T	133541624	0	36	T	C	0.014	436664.2	61020.15	4.012093e-08	4.481637e-09	4.648295e-05
2	2_135703664_C_T	135703664	0	36	T	C	0.056	200410.0	40355.82	2.193049e-05	5.75148e-06	0.0003936114
2	2_135710149_C_T	135710149	0	36	T	C	0.014	321853.0	80387.58	0.0003465485	0.0001315578	0.001525498
2	2_136480013_T_C	136480013	0	36	C	T	0.014	321853.0	80387.58	0.0003465485	0.0001315578	0.001525498
2	2_136552371_A_G	136552371	0	36	G	A	0.097	110137.3	30667.01	0.001086584	0.0004800145	0.002970221
2	2_137988955_C_T	137988955	0	36	T	C	0.014	436664.2	61020.15	4.012093e-08	4.481637e-09	4.648295e-05
2	2_139045457_A_AAAAAAAAG	139045457	0	36	AAAAAAAAG	A	0.014	436664.2	61020.15	4.012093e-08	4.481637e-09	4.648295e-05
2	2_140990917_T_G	140990917	0	36	G	T	0.028	208186.3	61328.14	0.001849249	0.0008762456	0.004151214
2	2_141093457_C_T	141093457	0	36	T	C	0.028	231936.7	59560.94	0.0004711466	0.0001863175	0.001812379
2	2_141528358_G_A	141528358	0	36	A	G	0.083	128226.3	37221.36	0.001615602	0.000752049	0.003806802
2	2_141533646_A_T	141533646	0	36	T	A	0.083	128226.3	37221.36	0.001615602	0.000752049	0.003806802
2	2_141709295_C_T	141709295	0	36	T	C	0.014	436664.2	61020.15	4.012093e-08	4.481637e-09	4.648295e-05
2	2_143676125_T_C	143676125	0	36	C	T	0.014	436664.2	61020.15	4.012093e-08	4.481637e-09	4.648295e-05
2	2_145255384_CTGTCATTCTCAACATATATATATATATGTCATTCTCAACATATATATATATA_C	145255384	0	36	C	CTGTCATTCTCAACATATATATATATATGTCATTCTCAACATATATATATATA	0.028	244155.6	56852.03	0.0001520563	5.17149e-05	0.0009831386
2	2_148675976_T_C	148675976	0	36	C	T	0.014	436664.2	61020.15	4.012093e-08	4.481637e-09	4.648295e-05
2	2_149240672_A_T	149240672	0	36	T	A	0.028	221562.4	58684.8	0.0006552156	0.0002707054	0.002192628
2	2_149633155_A_C	149633155	0	36	C	A	0.042	168183.8	51670.53	0.00268032	0.00133344	0.005296811
2	2_149799027_A_G	149799027	0	36	G	A	0.014	436664.2	61020.15	4.012093e-08	4.481637e-09	4.648295e-05
2	2_149864403_T_C	149864403	0	36	C	T	0.014	436664.2	61020.15	4.012093e-08	4.481637e-09	4.648295e-05
2	2_149864414_T_C	149864414	0	36	C	T	0.014	436664.2	61020.15	4.012093e-08	4.481637e-09	4.648295e-05
2	2_152235888_G_A	152235888	0	36	A	G	0.014	321853.0	80387.58	0.0003465485	0.0001315578	0.001525498
2	2_152322115_C_T	152322115	0	36	T	C	0.014	321853.0	80387.58	0.0003465485	0.0001315578	0.001525498
2	2_152476341_T_G	152476341	0	36	G	T	0.014	321853.0	80387.58	0.0003465485	0.0001315578	0.001525498
2	2_152496038_G_A	152496038	0	36	A	G	0.264	96681.69	20218.82	3.743351e-05	1.054963e-05	0.000499179
2	2_152496526_A_G	152496526	0	36	G	A	0.333	98562.98	21447.9	6.413737e-05	1.943118e-05	0.0006413465
2	2_152511778_A_C	152511778	0	36	C	A	0.292	88308.4	20510.77	0.0001474061	4.992555e-05	0.0009675907
2	2_152520027_A_G	152520027	0	36	G	A	0.292	88308.4	20510.77	0.0001474061	4.992555e-05	0.0009675907
2	2_152521096_C_T	152521096	0	36	T	C	0.306	82707.78	20440.88	0.0003075466	0.0001149098	0.001428489
2	2_152522556_T_C	152522556	0	36	C	T	0.181	80222.18	23836.78	0.001999076	0.0009569889	0.004366029
2	2_152525471_A_G	152525471	0	36	G	A	0.181	80222.18	23836.78	0.001999076	0.0009569889	0.004366029
2	2_152527572_C_T	152527572	0	36	T	C	0.681	-94446.44	21194.12	9.573057e-05	3.060294e-05	0.0007787902
2	2_152527608_C_T	152527608	0	36	T	C	0.181	80222.18	23836.78	0.001999076	0.0009569889	0.004366029
2	2_152531077_A_G	152531077	0	36	G	A	0.861	-89833.04	24598.98	0.0009209006	0.0003980204	0.00268532
2	2_152531781_C_A	152531781	0	36	A	C	0.139	89833.04	24598.98	0.0009209006	0.0003980204	0.00268532
2	2_152536498_T_A	152536498	0	36	A	T	0.736	-87119.69	21097.51	0.0002431565	8.804997e-05	0.001257822
2	2_152551210_G_A	152551210	0	36	A	G	0.306	83939.25	20971.93	0.0003478249	0.000132107	0.001528605
2	2_152552062_A_C	152552062	0	36	C	A	0.653	-80866.74	21650.83	0.0007326614	0.0003072187	0.002341829
2	2_152566433_A_G	152566433	0	36	G	A	0.694	-83939.25	20971.93	0.0003478249	0.000132107	0.001528605
2	2_152573902_A_AGGC	152573902	0	36	AGGC	A	0.681	-80138.67	20795.69	0.0005274343	0.0002117276	0.001933191
2	2_152573981_A_G	152573981	0	36	G	A	0.681	-80138.67	20795.69	0.0005274343	0.0002117276	0.001933191
2	2_152584153_A_C	152584153	0	36	C	A	0.875	-93415.5	24542.58	0.0006016163	0.0002457624	0.002086029
2	2_152827881_G_T	152827881	0	36	T	G	0.028	208171.6	61328.22	0.001850456	0.0008768922	0.004152961
2	2_155303092_C_T	155303092	0	36	T	C	0.014	436664.2	61020.15	4.012093e-08	4.481637e-09	4.648295e-05
2	2_157426820_A_C	157426820	0	36	C	A	0.014	436664.2	61020.15	4.012093e-08	4.481637e-09	4.648295e-05
2	2_158152856_A_T	158152856	0	36	T	A	0.014	321853.0	80387.58	0.0003465485	0.0001315578	0.001525498
2	2_158156095_A_C	158156095	0	36	C	A	0.014	436664.2	61020.15	4.012093e-08	4.481637e-09	4.648295e-05
2	2_158283943_GA_G	158283943	0	36	G	GA	0.028	208174.8	61334.78	0.001851996	0.0008777182	0.004155191
2	2_158971618_C_G	158971618	0	36	G	C	0.028	400526.3	10158.92	1.061351e-28	2.042744e-32	1.294467e-06
2	2_159434025_T_C	159434025	0	36	C	T	0.014	321853.0	80387.58	0.0003465485	0.0001315578	0.001525498
2	2_159499113_A_G	159499113	0	36	G	A	0.028	208167.9	61239.19	0.001826468	0.0008640413	0.004118161
2	2_160043591_G_A	160043591	0	36	A	G	0.014	321853.0	80387.58	0.0003465485	0.0001315578	0.001525498
2	2_160182374_T_C	160182374	0	36	C	T	0.014	321853.0	80387.58	0.0003465485	0.0001315578	0.001525498
2	2_160231357_G_A	160231357	0	36	A	G	0.028	229399.0	59570.43	0.0005314595	0.000213559	0.00194166
2	2_160634289_G_A	160634289	0	36	A	G	0.014	436664.2	61020.15	4.012093e-08	4.481637e-09	4.648295e-05
2	2_160664905_T_C	160664905	0	36	C	T	0.014	436664.2	61020.15	4.012093e-08	4.481637e-09	4.648295e-05
2	2_160698709_T_C	160698709	0	36	C	T	0.042	174564.6	52887.15	0.00237489	0.001162901	0.00488775
2	2_160710934_G_A	160710934	0	36	A	G	0.014	436664.2	61020.15	4.012093e-08	4.481637e-09	4.648295e-05
2	2_160734766_CA_C	160734766	0	36	C	CA	0.014	321853.0	80387.58	0.0003465485	0.0001315578	0.001525498
2	2_160755272_T_C	160755272	0	36	C	T	0.014	436664.2	61020.15	4.012093e-08	4.481637e-09	4.648295e-05
2	2_160876771_T_C	160876771	0	36	C	T	0.014	436664.2	61020.15	4.012093e-08	4.481637e-09	4.648295e-05
2	2_160879360_C_T	160879360	0	36	T	C	0.014	436664.2	61020.15	4.012093e-08	4.481637e-09	4.648295e-05
2	2_160918875_CCAG_C	160918875	0	36	C	CCAG	0.014	321853.0	80387.58	0.0003465485	0.0001315578	0.001525498
2	2_162565325_T_G	162565325	0	36	G	T	0.028	221339.5	59665.9	0.0007857847	0.0003325639	0.002441285
2	2_162757321_G_A	162757321	0	36	A	G	0.014	436664.2	61020.15	4.012093e-08	4.481637e-09	4.648295e-05
2	2_163054299_A_C	163054299	0	36	C	A	0.014	436664.2	61020.15	4.012093e-08	4.481637e-09	4.648295e-05
2	2_164466032_T_C	164466032	0	36	C	T	0.014	321853.0	80387.58	0.0003465485	0.0001315578	0.001525498
2	2_166200978_TA_T	166200978	0	36	T	TA	0.014	321853.0	80387.58	0.0003465485	0.0001315578	0.001525498
2	2_166237768_G_A	166237768	0	36	A	G	0.014	436664.2	61020.15	4.012093e-08	4.481637e-09	4.648295e-05
2	2_166756333_G_A	166756333	0	36	A	G	0.014	436664.2	61020.15	4.012093e-08	4.481637e-09	4.648295e-05
2	2_166898758_G_A	166898758	0	36	A	G	0.014	321853.0	80387.58	0.0003465485	0.0001315578	0.001525498
2	2_167094721_A_G	167094721	0	36	G	A	0.014	436664.2	61020.15	4.012093e-08	4.481637e-09	4.648295e-05
2	2_167144871_G_A	167144871	0	36	A	G	0.028	221575.6	58618.45	0.0006471075	0.0002669143	0.002176689
2	2_167262238_C_T	167262238	0	36	T	C	0.028	221560.2	58697.0	0.0006567075	0.0002714036	0.002195554
2	2_168067447_C_T	168067447	0	36	T	C	0.069	162917.3	37575.36	0.000135194	4.526278e-05	0.0009257969
2	2_169712130_T_A	169712130	0	36	A	T	0.014	321853.0	80387.58	0.0003465485	0.0001315578	0.001525498
2	2_169712132_G_A	169712132	0	36	A	G	0.014	321853.0	80387.58	0.0003465485	0.0001315578	0.001525498
2	2_169830193_C_T	169830193	0	36	T	C	0.014	436664.2	61020.15	4.012093e-08	4.481637e-09	4.648295e-05
2	2_169938208_G_A	169938208	0	36	A	G	0.028	221575.6	58618.45	0.0006471075	0.0002669143	0.002176689
2	2_170048482_C_T	170048482	0	36	T	C	0.014	436664.2	61020.15	4.012093e-08	4.481637e-09	4.648295e-05
2	2_170070172_C_T	170070172	0	36	T	C	0.014	321853.0	80387.58	0.0003465485	0.0001315578	0.001525498
2	2_170094432_C_T	170094432	0	36	T	C	0.014	436664.2	61020.15	4.012093e-08	4.481637e-09	4.648295e-05
2	2_170149034_G_GAT	170149034	0	36	GAT	G	0.056	200512.2	40378.26	2.194514e-05	5.755842e-06	0.0003937256
2	2_170557667_A_C	170557667	0	36	C	A	0.014	436664.2	61020.15	4.012093e-08	4.481637e-09	4.648295e-05
2	2_170632890_A_C	170632890	0	36	C	A	0.042	135561.8	37117.39	0.0009200349	0.0003975968	0.002683793
2	2_170912150_G_A	170912150	0	36	A	G	0.014	321853.0	80387.58	0.0003465485	0.0001315578	0.001525498
2	2_171092439_C_G	171092439	0	36	G	C	0.014	321853.0	80387.58	0.0003465485	0.0001315578	0.001525498
2	2_171092784_C_A	171092784	0	36	A	C	0.028	221560.2	58697.0	0.0006567075	0.0002714036	0.002195554
2	2_171092786_A_G	171092786	0	36	G	A	0.014	436664.2	61020.15	4.012093e-08	4.481637e-09	4.648295e-05
2	2_171243489_A_G	171243489	0	36	G	A	0.028	221553.1	58681.38	0.0006551038	0.000270653	0.002192408
2	2_171675269_G_C	171675269	0	36	C	G	0.014	321853.0	80387.58	0.0003465485	0.0001315578	0.001525498
2	2_171884790_A_T	171884790	0	36	T	A	0.014	321853.0	80387.58	0.0003465485	0.0001315578	0.001525498
2	2_171916424_C_T	171916424	0	36	T	C	0.014	321853.0	80387.58	0.0003465485	0.0001315578	0.001525498
2	2_171923642_T_G	171923642	0	36	G	T	0.014	436664.2	61020.15	4.012093e-08	4.481637e-09	4.648295e-05
2	2_172563645_C_T	172563645	0	36	T	C	0.014	321853.0	80387.58	0.0003465485	0.0001315578	0.001525498
2	2_173330117_C_T	173330117	0	36	T	C	0.028	208179.4	61352.55	0.001856499	0.0008801335	0.00416171
2	2_173332040_C_A	173332040	0	36	A	C	0.028	208179.4	61352.55	0.001856499	0.0008801335	0.00416171
2	2_173354358_A_G	173354358	0	36	G	A	0.014	321853.0	80387.58	0.0003465485	0.0001315578	0.001525498
2	2_173366829_G_A	173366829	0	36	A	G	0.014	436664.2	61020.15	4.012093e-08	4.481637e-09	4.648295e-05
2	2_174086201_CGAT_C	174086201	0	36	C	CGAT	0.014	436664.2	61020.15	4.012093e-08	4.481637e-09	4.648295e-05
2	2_174828517_GC_G	174828517	0	36	G	GC	0.014	436664.2	61020.15	4.012093e-08	4.481637e-09	4.648295e-05
2	2_175202037_C_T	175202037	0	36	T	C	0.014	321853.0	80387.58	0.0003465485	0.0001315578	0.001525498
2	2_175318387_C_CAA	175318387	0	36	CAA	C	0.028	218332.1	30510.07	4.012093e-08	4.481637e-09	4.648295e-05
2	2_176805795_A_C	176805795	0	36	C	A	0.014	321853.0	80387.58	0.0003465485	0.0001315578	0.001525498
2	2_176964947_G_A	176964947	0	36	A	G	0.014	321853.0	80387.58	0.0003465485	0.0001315578	0.001525498
2	2_176993583_C_G	176993583	0	36	G	C	0.028	221560.8	58687.11	0.0006555339	0.0002708543	0.002193252
2	2_177053426_A_C	177053426	0	36	C	A	0.028	221560.8	58687.11	0.0006555339	0.0002708543	0.002193252
2	2_177495135_A_C	177495135	0	36	C	A	0.014	436664.2	61020.15	4.012093e-08	4.481637e-09	4.648295e-05
2	2_177495233_G_A	177495233	0	36	A	G	0.014	436664.2	61020.15	4.012093e-08	4.481637e-09	4.648295e-05
2	2_178178448_T_A	178178448	0	36	A	T	0.028	221562.2	58701.93	0.0006572218	0.0002716443	0.002196562
2	2_178528764_A_AT	178528764	0	36	AT	A	0.014	436664.2	61020.15	4.012093e-08	4.481637e-09	4.648295e-05
2	2_178681447_C_A	178681447	0	36	A	C	0.347	78416.17	22733.76	0.00159675	0.0007421261	0.003778454
2	2_178681534_C_T	178681534	0	36	T	C	0.347	78416.17	22733.76	0.00159675	0.0007421261	0.003778454
2	2_178682558_A_ATATAAAC	178682558	0	36	ATATAAAC	A	0.347	78416.17	22733.76	0.00159675	0.0007421261	0.003778454
2	2_178682603_T_C	178682603	0	36	C	T	0.347	78416.17	22733.76	0.00159675	0.0007421261	0.003778454
2	2_178682655_A_G	178682655	0	36	G	A	0.347	78416.17	22733.76	0.00159675	0.0007421261	0.003778454
2	2_178684799_T_C	178684799	0	36	C	T	0.347	78416.17	22733.76	0.00159675	0.0007421261	0.003778454
2	2_178684820_G_A	178684820	0	36	A	G	0.347	78416.17	22733.76	0.00159675	0.0007421261	0.003778454
2	2_178684878_A_AAG	178684878	0	36	AAG	A	0.222	95485.52	21027.34	7.502889e-05	2.321427e-05	0.0006914571
2	2_178684879_T_G	178684879	0	36	G	T	0.222	95485.52	21027.34	7.502889e-05	2.321427e-05	0.0006914571
2	2_178684921_G_A	178684921	0	36	A	G	0.222	95485.52	21027.34	7.502889e-05	2.321427e-05	0.0006914571
2	2_178764364_A_AATATAT	178764364	0	36	AATATAT	A	0.167	95345.59	25661.51	0.0007732016	0.0003265395	0.002417923
2	2_179247468_C_T	179247468	0	36	T	C	0.028	208173.6	61339.8	0.001853476	0.0008785118	0.004157334
2	2_179363934_C_T	179363934	0	36	T	C	0.014	436664.2	61020.15	4.012093e-08	4.481637e-09	4.648295e-05
2	2_179395554_G_A	179395554	0	36	A	G	0.014	436664.2	61020.15	4.012093e-08	4.481637e-09	4.648295e-05
2	2_179395555_C_A	179395555	0	36	A	C	0.014	436664.2	61020.15	4.012093e-08	4.481637e-09	4.648295e-05
2	2_179395573_C_T	179395573	0	36	T	C	0.014	436664.2	61020.15	4.012093e-08	4.481637e-09	4.648295e-05
2	2_179400130_G_A	179400130	0	36	A	G	0.014	321853.0	80387.58	0.0003465485	0.0001315578	0.001525498
2	2_179403394_C_T	179403394	0	36	T	C	0.014	321853.0	80387.58	0.0003465485	0.0001315578	0.001525498
2	2_179476242_C_T	179476242	0	36	T	C	0.014	436664.2	61020.15	4.012093e-08	4.481637e-09	4.648295e-05
2	2_179517277_A_T	179517277	0	36	T	A	0.014	321853.0	80387.58	0.0003465485	0.0001315578	0.001525498
2	2_179578703_C_T	179578703	0	36	T	C	0.014	321853.0	80387.58	0.0003465485	0.0001315578	0.001525498
2	2_179590012_C_T	179590012	0	36	T	C	0.028	208179.4	61352.55	0.001856499	0.0008801335	0.00416171
2	2_179591710_A_G	179591710	0	36	G	A	0.014	321853.0	80387.58	0.0003465485	0.0001315578	0.001525498
2	2_179621184_G_A	179621184	0	36	A	G	0.014	436664.2	61020.15	4.012093e-08	4.481637e-09	4.648295e-05
2	2_179621503_C_T	179621503	0	36	T	C	0.014	436664.2	61020.15	4.012093e-08	4.481637e-09	4.648295e-05
2	2_179654032_T_G	179654032	0	36	G	T	0.014	436664.2	61020.15	4.012093e-08	4.481637e-09	4.648295e-05
2	2_179718301_T_A	179718301	0	36	A	T	0.028	208179.4	61352.55	0.001856499	0.0008801335	0.00416171
2	2_182170189_G_A	182170189	0	36	A	G	0.014	436664.2	61020.15	4.012093e-08	4.481637e-09	4.648295e-05
2	2_182404044_G_A	182404044	0	36	A	G	0.014	321853.0	80387.58	0.0003465485	0.0001315578	0.001525498
2	2_183995119_T_A	183995119	0	36	A	T	0.014	321853.0	80387.58	0.0003465485	0.0001315578	0.001525498
2	2_183995133_TTG_T	183995133	0	36	T	TTG	0.014	321853.0	80387.58	0.0003465485	0.0001315578	0.001525498
2	2_186659402_C_T	186659402	0	36	T	C	0.014	436664.2	61020.15	4.012093e-08	4.481637e-09	4.648295e-05
2	2_186666026_T_A	186666026	0	36	A	T	0.014	436664.2	61020.15	4.012093e-08	4.481637e-09	4.648295e-05
2	2_187511466_A_G	187511466	0	36	G	A	0.014	436664.2	61020.15	4.012093e-08	4.481637e-09	4.648295e-05
2	2_187605000_G_A	187605000	0	36	A	G	0.014	436664.2	61020.15	4.012093e-08	4.481637e-09	4.648295e-05
2	2_188250444_CTA_C	188250444	0	36	C	CTA	0.014	436664.2	61020.15	4.012093e-08	4.481637e-09	4.648295e-05
2	2_189348274_T_C	189348274	0	36	C	T	0.014	436664.2	61020.15	4.012093e-08	4.481637e-09	4.648295e-05
2	2_189853180_A_G	189853180	0	36	G	A	0.014	436664.2	61020.15	4.012093e-08	4.481637e-09	4.648295e-05
2	2_189859080_C_T	189859080	0	36	T	C	0.014	436664.2	61020.15	4.012093e-08	4.481637e-09	4.648295e-05
2	2_189861006_ATATG_A	189861006	0	36	A	ATATG	0.028	247985.9	56789.25	0.0001237164	4.093123e-05	0.0008851058
2	2_189861018_ATATC_A	189861018	0	36	A	ATATC	0.028	247985.9	56789.25	0.0001237164	4.093123e-05	0.0008851058
2	2_189862308_T_A	189862308	0	36	A	T	0.014	436664.2	61020.15	4.012093e-08	4.481637e-09	4.648295e-05
2	2_189870199_T_G	189870199	0	36	G	T	0.014	436664.2	61020.15	4.012093e-08	4.481637e-09	4.648295e-05
2	2_189872891_G_C	189872891	0	36	C	G	0.042	212555.7	52494.49	0.0003050339	0.0001138464	0.001422091
2	2_189898904_A_G	189898904	0	36	G	A	0.014	321853.0	80387.58	0.0003465485	0.0001315578	0.001525498
2	2_190560817_T_C	190560817	0	36	C	T	0.014	436664.2	61020.15	4.012093e-08	4.481637e-09	4.648295e-05
2	2_190593168_ATTTTT_A	190593168	0	36	A	ATTTTT	0.194	85280.62	26167.84	0.002651781	0.001317394	0.005259084
2	2_190642946_C_T	190642946	0	36	T	C	0.181	86009.81	25977.43	0.002311255	0.001127716	0.00480095
2	2_190660683_G_A	190660683	0	36	A	G	0.014	436664.2	61020.15	4.012093e-08	4.481637e-09	4.648295e-05
2	2_190660727_T_G	190660727	0	36	G	T	0.014	436664.2	61020.15	4.012093e-08	4.481637e-09	4.648295e-05
2	2_190670808_CAT_C	190670808	0	36	C	CAT	0.167	89404.41	25939.67	0.001608386	0.0007482492	0.003795962
2	2_190671255_C_T	190671255	0	36	T	C	0.014	436664.2	61020.15	4.012093e-08	4.481637e-09	4.648295e-05
2	2_190682632_G_C	190682632	0	36	C	G	0.167	89404.41	25939.67	0.001608386	0.0007482492	0.003795962
2	2_190719073_G_A	190719073	0	36	A	G	0.014	321853.0	80387.58	0.0003465485	0.0001315578	0.001525498
2	2_190720748_AT_A	190720748	0	36	A	AT	0.042	212555.7	52494.49	0.0003050339	0.0001138464	0.001422091
2	2_191399273_G_A	191399273	0	36	A	G	0.028	221560.9	58687.06	0.0006555255	0.0002708503	0.002193236
2	2_191775083_CT_C	191775083	0	36	C	CT	0.069	160476.2	40761.68	0.0004179881	0.0001626856	0.001693682
2	2_191864302_A_G	191864302	0	36	G	A	0.014	436664.2	61020.15	4.012093e-08	4.481637e-09	4.648295e-05
2	2_192141769_G_A	192141769	0	36	A	G	0.014	321853.0	80387.58	0.0003465485	0.0001315578	0.001525498
2	2_192229060_A_G	192229060	0	36	G	A	0.014	436664.2	61020.15	4.012093e-08	4.481637e-09	4.648295e-05
2	2_196863799_G_A	196863799	0	36	A	G	0.056	144175.9	33504.25	0.0001483567	5.029073e-05	0.0009707848
2	2_197172742_C_T	197172742	0	36	T	C	0.014	321853.0	80387.58	0.0003465485	0.0001315578	0.001525498
2	2_198051896_T_C	198051896	0	36	C	T	0.014	436664.2	61020.15	4.012093e-08	4.481637e-09	4.648295e-05
2	2_198353159_G_A	198353159	0	36	A	G	0.014	321853.0	80387.58	0.0003465485	0.0001315578	0.001525498
2	2_200323507_T_C	200323507	0	36	C	T	0.028	221560.2	58697.0	0.0006567075	0.0002714036	0.002195554
2	2_201994890_G_T	201994890	0	36	T	G	0.014	321853.0	80387.58	0.0003465485	0.0001315578	0.001525498
2	2_201994899_T_G	201994899	0	36	G	T	0.014	321853.0	80387.58	0.0003465485	0.0001315578	0.001525498
2	2_202073764_C_CTTT	202073764	0	36	CTTT	C	0.014	436664.2	61020.15	4.012093e-08	4.481637e-09	4.648295e-05
2	2_202211458_ATCT_A	202211458	0	36	A	ATCT	0.028	208170.5	61305.18	0.001844241	0.000873561	0.004143957
2	2_202252478_A_G	202252478	0	36	G	A	0.028	208170.5	61305.18	0.001844241	0.000873561	0.004143957
2	2_202352480_G_A	202352480	0	36	A	G	0.028	221562.2	58701.93	0.0006572218	0.0002716443	0.002196562
2	2_202358234_T_A	202358234	0	36	A	T	0.014	436664.2	61020.15	4.012093e-08	4.481637e-09	4.648295e-05
2	2_202491995_G_A	202491995	0	36	A	G	0.292	65516.86	20056.26	0.002598663	0.001287587	0.005188604
2	2_202540016_G_T	202540016	0	36	T	G	0.014	321853.0	80387.58	0.0003465485	0.0001315578	0.001525498
2	2_202550420_T_C	202550420	0	36	C	T	0.014	436664.2	61020.15	4.012093e-08	4.481637e-09	4.648295e-05
2	2_202580514_C_T	202580514	0	36	T	C	0.028	208186.3	61328.14	0.001849249	0.0008762456	0.004151214
2	2_202593085_T_C	202593085	0	36	C	T	0.014	436664.2	61020.15	4.012093e-08	4.481637e-09	4.648295e-05
2	2_202725405_G_A	202725405	0	36	A	G	0.014	436664.2	61020.15	4.012093e-08	4.481637e-09	4.648295e-05
2	2_203143096_G_C	203143096	0	36	C	G	0.028	221575.6	58618.45	0.0006471075	0.0002669143	0.002176689
2	2_203384792_A_T	203384792	0	36	T	A	0.028	229399.0	59570.43	0.0005314595	0.000213559	0.00194166
2	2_203500079_AGCG_A	203500079	0	36	A	AGCG	0.014	321853.0	80387.58	0.0003465485	0.0001315578	0.001525498
2	2_204137295_G_A	204137295	0	36	A	G	0.014	436664.2	61020.15	4.012093e-08	4.481637e-09	4.648295e-05
2	2_204137296_AGTT_A	204137296	0	36	A	AGTT	0.014	436664.2	61020.15	4.012093e-08	4.481637e-09	4.648295e-05
2	2_204193210_TGAG_T	204193210	0	36	T	TGAG	0.028	208227.3	61337.8	0.001848587	0.0008758902	0.004150253
2	2_205986289_C_G	205986289	0	36	G	C	0.014	321853.0	80387.58	0.0003465485	0.0001315578	0.001525498
2	2_205989263_A_G	205989263	0	36	G	A	0.014	321853.0	80387.58	0.0003465485	0.0001315578	0.001525498
2	2_206592549_G_GA	206592549	0	36	GA	G	0.014	321853.0	80387.58	0.0003465485	0.0001315578	0.001525498
2	2_206592573_G_A	206592573	0	36	A	G	0.042	170535.4	51664.54	0.002374128	0.001162479	0.004886713
2	2_206608039_T_C	206608039	0	36	C	T	0.986	-321853.0	80387.58	0.0003465485	0.0001315578	0.001525498
2	2_206610334_A_T	206610334	0	36	T	A	0.014	321853.0	80387.58	0.0003465485	0.0001315578	0.001525498
2	2_206610677_C_T	206610677	0	36	T	C	0.014	321853.0	80387.58	0.0003465485	0.0001315578	0.001525498
2	2_206631601_TG_T	206631601	0	36	T	TG	0.028	208186.3	61328.14	0.001849249	0.0008762456	0.004151214
2	2_207274847_G_C	207274847	0	36	C	G	0.028	221575.6	58618.45	0.0006471075	0.0002669143	0.002176689
2	2_207564546_C_A	207564546	0	36	A	C	0.028	208165.6	61339.7	0.001854095	0.0008788437	0.004158229
2	2_207911028_AAGAAGAAGAAGAAGAAGAAGAAGAAGAAGGAGAAGGAGAAGGAGAAGG_AAGAAGG	207911028	0	36	AAGAAGG	AAGAAGAAGAAGAAGAAGAAGAAGAAGAAGGAGAAGGAGAAGGAGAAGG	0.014	436664.2	61020.15	4.012093e-08	4.481637e-09	4.648295e-05
2	2_207911114_GGAGGAGAAA_G	207911114	0	36	G	GGAGGAGAAA	0.028	229399.0	59570.43	0.0005314595	0.000213559	0.00194166
2	2_207911120_GAAAAA_G	207911120	0	36	G	GAAAAA	0.014	436664.2	61020.15	4.012093e-08	4.481637e-09	4.648295e-05
2	2_207911127_A_AGG	207911127	0	36	AGG	A	0.014	436664.2	61020.15	4.012093e-08	4.481637e-09	4.648295e-05
2	2_207911130_A_G	207911130	0	36	G	A	0.014	436664.2	61020.15	4.012093e-08	4.481637e-09	4.648295e-05
2	2_208447714_T_G	208447714	0	36	G	T	0.014	436664.2	61020.15	4.012093e-08	4.481637e-09	4.648295e-05
2	2_208865736_T_A	208865736	0	36	A	T	0.014	321853.0	80387.58	0.0003465485	0.0001315578	0.001525498
2	2_209047810_A_G	209047810	0	36	G	A	0.014	436664.2	61020.15	4.012093e-08	4.481637e-09	4.648295e-05
2	2_209108497_A_G	209108497	0	36	G	A	0.014	436664.2	61020.15	4.012093e-08	4.481637e-09	4.648295e-05
2	2_210777179_C_T	210777179	0	36	T	C	0.014	436664.2	61020.15	4.012093e-08	4.481637e-09	4.648295e-05
2	2_210786939_T_C	210786939	0	36	C	T	0.014	321853.0	80387.58	0.0003465485	0.0001315578	0.001525498
2	2_210819095_A_G	210819095	0	36	G	A	0.083	129737.6	38538.29	0.001993851	0.0009541597	0.00435861
2	2_210905194_T_C	210905194	0	36	C	T	0.056	200464.3	40371.11	2.196469e-05	5.76166e-06	0.0003938779
2	2_211070613_A_G	211070613	0	36	G	A	0.028	221561.8	58687.92	0.0006555987	0.0002708846	0.002193379
2	2_211503856_A_G	211503856	0	36	G	A	0.042	266594.9	34804.46	9.921335e-09	9.166602e-10	3.288455e-05
2	2_211504033_A_C	211504033	0	36	C	A	0.014	436664.2	61020.15	4.012093e-08	4.481637e-09	4.648295e-05
2	2_211521422_T_C	211521422	0	36	C	T	0.042	266594.9	34804.46	9.921335e-09	9.166602e-10	3.288455e-05
2	2_211528001_T_C	211528001	0	36	C	T	0.083	127911.4	37439.08	0.001743888	0.0008199701	0.003997427
2	2_215809637_ATATT_A	215809637	0	36	A	ATATT	0.014	321853.0	80387.58	0.0003465485	0.0001315578	0.001525498
2	2_216269036_G_T	216269036	0	36	T	G	0.028	208171.6	61328.22	0.001850456	0.0008768922	0.004152961
2	2_216299608_T_C	216299608	0	36	C	T	0.014	321853.0	80387.58	0.0003465485	0.0001315578	0.001525498
2	2_216990772_A_G	216990772	0	36	G	A	0.014	321853.0	80387.58	0.0003465485	0.0001315578	0.001525498
2	2_217002951_T_C	217002951	0	36	C	T	0.014	321853.0	80387.58	0.0003465485	0.0001315578	0.001525498
2	2_218669288_G_A	218669288	0	36	A	G	0.014	436664.2	61020.15	4.012093e-08	4.481637e-09	4.648295e-05
2	2_218762662_GTCC_G	218762662	0	36	G	GTCC	0.028	208180.3	61358.86	0.001858164	0.0008810268	0.004164119
2	2_218770988_T_TC	218770988	0	36	TC	T	0.014	436664.2	61020.15	4.012093e-08	4.481637e-09	4.648295e-05
2	2_219000460_C_T	219000460	0	36	T	C	0.014	436664.2	61020.15	4.012093e-08	4.481637e-09	4.648295e-05
2	2_219209248_G_A	219209248	0	36	A	G	0.014	321853.0	80387.58	0.0003465485	0.0001315578	0.001525498
2	2_219507166_G_A	219507166	0	36	A	G	0.014	436664.2	61020.15	4.012093e-08	4.481637e-09	4.648295e-05
2	2_219509078_T_C	219509078	0	36	C	T	0.014	321853.0	80387.58	0.0003465485	0.0001315578	0.001525498
2	2_219540242_TC_T	219540242	0	36	T	TC	0.014	321853.0	80387.58	0.0003465485	0.0001315578	0.001525498
2	2_219678877_C_T	219678877	0	36	T	C	0.014	436664.2	61020.15	4.012093e-08	4.481637e-09	4.648295e-05
2	2_220041654_C_G	220041654	0	36	G	C	0.014	436664.2	61020.15	4.012093e-08	4.481637e-09	4.648295e-05
2	2_220081416_G_A	220081416	0	36	A	G	0.014	436664.2	61020.15	4.012093e-08	4.481637e-09	4.648295e-05
2	2_220087088_T_G	220087088	0	36	G	T	0.014	436664.2	61020.15	4.012093e-08	4.481637e-09	4.648295e-05
2	2_220155459_C_A	220155459	0	36	A	C	0.014	436664.2	61020.15	4.012093e-08	4.481637e-09	4.648295e-05
2	2_220246193_A_C	220246193	0	36	C	A	0.014	321853.0	80387.58	0.0003465485	0.0001315578	0.001525498
2	2_220246334_T_C	220246334	0	36	C	T	0.014	321853.0	80387.58	0.0003465485	0.0001315578	0.001525498
2	2_220246455_C_T	220246455	0	36	T	C	0.014	321853.0	80387.58	0.0003465485	0.0001315578	0.001525498
2	2_220246692_G_C	220246692	0	36	C	G	0.014	321853.0	80387.58	0.0003465485	0.0001315578	0.001525498
2	2_220246709_G_T	220246709	0	36	T	G	0.014	321853.0	80387.58	0.0003465485	0.0001315578	0.001525498
2	2_220285182_C_A	220285182	0	36	A	C	0.028	221562.4	58684.8	0.0006552156	0.0002707054	0.002192628
2	2_220290525_G_A	220290525	0	36	A	G	0.014	321853.0	80387.58	0.0003465485	0.0001315578	0.001525498
2	2_220347746_G_A	220347746	0	36	A	G	0.014	321853.0	80387.58	0.0003465485	0.0001315578	0.001525498
2	2_220397313_GTGTC_G	220397313	0	36	G	GTGTC	0.014	321853.0	80387.58	0.0003465485	0.0001315578	0.001525498
2	2_220397319_G_A	220397319	0	36	A	G	0.014	321853.0	80387.58	0.0003465485	0.0001315578	0.001525498
2	2_220397322_C_CAA	220397322	0	36	CAA	C	0.014	321853.0	80387.58	0.0003465485	0.0001315578	0.001525498
2	2_220397323_C_CA	220397323	0	36	CA	C	0.014	321853.0	80387.58	0.0003465485	0.0001315578	0.001525498
2	2_220397324_C_T	220397324	0	36	T	C	0.014	321853.0	80387.58	0.0003465485	0.0001315578	0.001525498
2	2_220471000_T_C	220471000	0	36	C	T	0.014	436664.2	61020.15	4.012093e-08	4.481637e-09	4.648295e-05
2	2_220480925_G_A	220480925	0	36	A	G	0.014	436664.2	61020.15	4.012093e-08	4.481637e-09	4.648295e-05
2	2_223339437_A_C	223339437	0	36	C	A	0.014	436664.2	61020.15	4.012093e-08	4.481637e-09	4.648295e-05
2	2_223916682_G_A	223916682	0	36	A	G	0.014	436664.2	61020.15	4.012093e-08	4.481637e-09	4.648295e-05
2	2_223917271_C_T	223917271	0	36	T	C	0.014	436664.2	61020.15	4.012093e-08	4.481637e-09	4.648295e-05
2	2_223918019_G_A	223918019	0	36	A	G	0.014	436664.2	61020.15	4.012093e-08	4.481637e-09	4.648295e-05
2	2_225362653_TTG_T	225362653	0	36	T	TTG	0.028	244155.6	56852.03	0.0001520563	5.17149e-05	0.0009831386
2	2_225422623_C_A	225422623	0	36	A	C	0.014	436664.2	61020.15	4.012093e-08	4.481637e-09	4.648295e-05
2	2_225422624_C_A	225422624	0	36	A	C	0.014	436664.2	61020.15	4.012093e-08	4.481637e-09	4.648295e-05
2	2_225422626_ATGGTTG_A	225422626	0	36	A	ATGGTTG	0.014	436664.2	61020.15	4.012093e-08	4.481637e-09	4.648295e-05
2	2_225434527_G_T	225434527	0	36	T	G	0.014	321853.0	80387.58	0.0003465485	0.0001315578	0.001525498
2	2_227660544_C_T	227660544	0	36	T	C	0.097	117730.1	35044.19	0.002031352	0.0009744887	0.004411754
2	2_227661003_C_G	227661003	0	36	G	C	0.028	208227.3	61337.8	0.001848587	0.0008758902	0.004150253
2	2_227662753_C_T	227662753	0	36	T	C	0.097	117730.1	35044.19	0.002031352	0.0009744887	0.004411754
2	2_227887311_A_C	227887311	0	36	C	A	0.014	321853.0	80387.58	0.0003465485	0.0001315578	0.001525498
2	2_227924831_A_C	227924831	0	36	C	A	0.028	221561.8	58687.92	0.0006555987	0.0002708846	0.002193379
2	2_227968553_A_C	227968553	0	36	C	A	0.694	-73466.49	22325.61	0.002438742	0.00119833	0.004974273
2	2_227974113_A_G	227974113	0	36	G	A	0.736	-85944.24	24109.38	0.001168329	0.0005210949	0.003105998
2	2_228147093_A_G	228147093	0	36	G	A	0.014	321853.0	80387.58	0.0003465485	0.0001315578	0.001525498
2	2_228157954_G_A	228157954	0	36	A	G	0.014	436664.2	61020.15	4.012093e-08	4.481637e-09	4.648295e-05
2	2_228228462_T_G	228228462	0	36	G	T	0.014	436664.2	61020.15	4.012093e-08	4.481637e-09	4.648295e-05
2	2_228477775_G_A	228477775	0	36	A	G	0.014	321853.0	80387.58	0.0003465485	0.0001315578	0.001525498
2	2_228493338_C_T	228493338	0	36	T	C	0.028	208227.3	61337.8	0.001848587	0.0008758902	0.004150253
2	2_228493339_A_G	228493339	0	36	G	A	0.028	208227.3	61337.8	0.001848587	0.0008758902	0.004150253
2	2_230655770_CTT_C	230655770	0	36	C	CTT	0.028	208157.4	61270.85	0.001835922	0.0008691033	0.00413189
2	2_231265019_C_T	231265019	0	36	T	C	0.014	321853.0	80387.58	0.0003465485	0.0001315578	0.001525498
2	2_231333557_G_A	231333557	0	36	A	G	0.014	321853.0	80387.58	0.0003465485	0.0001315578	0.001525498
2	2_231333558_T_A	231333558	0	36	A	T	0.014	321853.0	80387.58	0.0003465485	0.0001315578	0.001525498
2	2_231333559_C_A	231333559	0	36	A	C	0.014	321853.0	80387.58	0.0003465485	0.0001315578	0.001525498
2	2_231403881_G_A	231403881	0	36	A	G	0.028	208167.9	61239.19	0.001826468	0.0008640413	0.004118161
2	2_232392834_A_C	232392834	0	36	C	A	0.014	321853.0	80387.58	0.0003465485	0.0001315578	0.001525498
2	2_233103209_C_T	233103209	0	36	T	C	0.014	321853.0	80387.58	0.0003465485	0.0001315578	0.001525498
2	2_233194446_C_T	233194446	0	36	T	C	0.014	321853.0	80387.58	0.0003465485	0.0001315578	0.001525498
2	2_233386150_GC_G	233386150	0	36	G	GC	0.014	321853.0	80387.58	0.0003465485	0.0001315578	0.001525498
2	2_233386152_C_A	233386152	0	36	A	C	0.014	321853.0	80387.58	0.0003465485	0.0001315578	0.001525498
2	2_233390807_C_T	233390807	0	36	T	C	0.014	321853.0	80387.58	0.0003465485	0.0001315578	0.001525498
2	2_233404310_C_G	233404310	0	36	G	C	0.014	321853.0	80387.58	0.0003465485	0.0001315578	0.001525498
2	2_233406178_G_A	233406178	0	36	A	G	0.014	321853.0	80387.58	0.0003465485	0.0001315578	0.001525498
2	2_233408458_C_T	233408458	0	36	T	C	0.014	321853.0	80387.58	0.0003465485	0.0001315578	0.001525498
2	2_233410503_T_C	233410503	0	36	C	T	0.014	321853.0	80387.58	0.0003465485	0.0001315578	0.001525498
2	2_233415520_G_A	233415520	0	36	A	G	0.014	321853.0	80387.58	0.0003465485	0.0001315578	0.001525498
2	2_233445561_T_G	233445561	0	36	G	T	0.028	221562.4	58684.8	0.0006552156	0.0002707054	0.002192628
2	2_233735162_C_T	233735162	0	36	T	C	0.014	321853.0	80387.58	0.0003465485	0.0001315578	0.001525498
2	2_234079577_G_C	234079577	0	36	C	G	0.014	436664.2	61020.15	4.012093e-08	4.481637e-09	4.648295e-05
2	2_234079612_G_A	234079612	0	36	A	G	0.014	436664.2	61020.15	4.012093e-08	4.481637e-09	4.648295e-05
2	2_234254810_T_TAATAAAATAA	234254810	0	36	TAATAAAATAA	T	0.181	77941.72	20121.99	0.0004990751	0.000198878	0.001872897
2	2_234365761_T_C	234365761	0	36	C	T	0.014	321853.0	80387.58	0.0003465485	0.0001315578	0.001525498
2	2_234368468_C_T	234368468	0	36	T	C	0.014	436664.2	61020.15	4.012093e-08	4.481637e-09	4.648295e-05
2	2_234377244_C_T	234377244	0	36	T	C	0.014	436664.2	61020.15	4.012093e-08	4.481637e-09	4.648295e-05
2	2_234463157_G_C	234463157	0	36	C	G	0.014	321853.0	80387.58	0.0003465485	0.0001315578	0.001525498
2	2_234873228_G_A	234873228	0	36	A	G	0.014	321853.0	80387.58	0.0003465485	0.0001315578	0.001525498
2	2_238244552_A_C	238244552	0	36	C	A	0.014	436664.2	61020.15	4.012093e-08	4.481637e-09	4.648295e-05
2	2_238270545_T_C	238270545	0	36	C	T	0.056	200465.7	40371.4	2.196465e-05	5.761646e-06	0.0003938776
2	2_238428455_C_A	238428455	0	36	A	C	0.042	169864.5	51663.87	0.00245691	0.001208432	0.00499879
2	2_238443140_G_A	238443140	0	36	A	G	0.014	321853.0	80387.58	0.0003465485	0.0001315578	0.001525498
2	2_238457822_G_A	238457822	0	36	A	G	0.014	321853.0	80387.58	0.0003465485	0.0001315578	0.001525498
2	2_238483117_C_T	238483117	0	36	T	C	0.014	321853.0	80387.58	0.0003465485	0.0001315578	0.001525498
2	2_238785796_G_A	238785796	0	36	A	G	0.014	321853.0	80387.58	0.0003465485	0.0001315578	0.001525498
2	2_238976522_G_A	238976522	0	36	A	G	0.028	221560.9	58687.06	0.0006555255	0.0002708503	0.002193236
2	2_239039183_G_A	239039183	0	36	A	G	0.153	100177.3	26821.03	0.0007326864	0.0003072306	0.002341876
2	2_239039779_G_A	239039779	0	36	A	G	0.111	114533.7	27960.77	0.0002670565	9.792135e-05	0.001322916
2	2_239040218_G_A	239040218	0	36	A	G	0.153	99044.96	26818.31	0.0008222122	0.0003500754	0.00250827
2	2_239040343_G_A	239040343	0	36	A	G	0.111	114533.7	27960.77	0.0002670565	9.792135e-05	0.001322916
2	2_239050142_G_A	239050142	0	36	A	G	0.097	128347.1	28257.83	7.481657e-05	2.313979e-05	0.0006905116
2	2_239057718_C_T	239057718	0	36	T	C	0.014	436664.2	61020.15	4.012093e-08	4.481637e-09	4.648295e-05
2	2_239168448_G_A	239168448	0	36	A	G	0.014	321853.0	80387.58	0.0003465485	0.0001315578	0.001525498
2	2_239177686_C_T	239177686	0	36	T	C	0.028	208165.6	61339.7	0.001854095	0.0008788437	0.004158229
2	2_240900795_C_T	240900795	0	36	T	C	0.111	95388.91	25686.59	0.0007773486	0.0003285236	0.002425636
2	2_240912983_G_T	240912983	0	36	T	G	0.139	84244.22	24554.91	0.001678084	0.0007850455	0.003900133
2	2_240984766_C_T	240984766	0	36	T	C	0.014	436664.2	61020.15	4.012093e-08	4.481637e-09	4.648295e-05
2	2_241403896_A_T	241403896	0	36	T	A	0.014	321853.0	80387.58	0.0003465485	0.0001315578	0.001525498
2	2_241451471_G_A	241451471	0	36	A	G	0.014	436664.2	61020.15	4.012093e-08	4.481637e-09	4.648295e-05
2	2_241536147_G_A	241536147	0	36	A	G	0.014	436664.2	61020.15	4.012093e-08	4.481637e-09	4.648295e-05
2	2_241616119_T_C	241616119	0	36	C	T	0.056	200495.4	40372.45	2.192604e-05	5.750156e-06	0.0003935767
2	2_241905379_C_G	241905379	0	36	G	C	0.014	436664.2	61020.15	4.012093e-08	4.481637e-09	4.648295e-05
2	2_242036871_A_G	242036871	0	36	G	A	0.014	321853.0	80387.58	0.0003465485	0.0001315578	0.001525498
2	2_242046189_A_G	242046189	0	36	G	A	0.014	436664.2	61020.15	4.012093e-08	4.481637e-09	4.648295e-05
2	2_242135499_C_A	242135499	0	36	A	C	0.014	321853.0	80387.58	0.0003465485	0.0001315578	0.001525498
2	2_242149775_G_A	242149775	0	36	A	G	0.014	321853.0	80387.58	0.0003465485	0.0001315578	0.001525498
2	2_242157353_CG_C	242157353	0	36	C	CG	0.139	77933.18	18772.02	0.0002283551	8.200018e-05	0.001216306
2	2_242576453_CG_C	242576453	0	36	C	CG	0.014	436664.2	61020.15	4.012093e-08	4.481637e-09	4.648295e-05
2	2_242576909_C_G	242576909	0	36	G	C	0.014	321853.0	80387.58	0.0003465485	0.0001315578	0.001525498
2	2_242593862_C_T	242593862	0	36	T	C	0.111	112443.1	33880.47	0.002263461	0.001101372	0.004735369
2	2_242755374_C_G	242755374	0	36	G	C	0.014	321853.0	80387.58	0.0003465485	0.0001315578	0.001525498
2	2_242946043_C_T	242946043	0	36	T	C	0.014	321853.0	80387.58	0.0003465485	0.0001315578	0.001525498
2	2_242946063_C_CGG	242946063	0	36	CGG	C	0.014	321853.0	80387.58	0.0003465485	0.0001315578	0.001525498
2	2_242946065_G_A	242946065	0	36	A	G	0.014	321853.0	80387.58	0.0003465485	0.0001315578	0.001525498
3	3_430968_C_T	430968	0	36	T	C	0.014	436664.2	61020.15	4.012093e-08	4.481637e-09	4.648295e-05
3	3_431187_C_T	431187	0	36	T	C	0.014	436664.2	61020.15	4.012093e-08	4.481637e-09	4.648295e-05
3	3_1445211_GA_GAA	1445211	0	36	GAA	GA	0.014	321853.0	80387.58	0.0003465485	0.0001315578	0.001525498
3	3_2671278_T_C	2671278	0	36	C	T	0.014	321853.0	80387.58	0.0003465485	0.0001315578	0.001525498
3	3_3117929_C_T	3117929	0	36	T	C	0.014	436664.2	61020.15	4.012093e-08	4.481637e-09	4.648295e-05
3	3_3137313_T_A	3137313	0	36	A	T	0.167	102583.8	26611.73	0.0005256521	0.0002109174	0.001929435
3	3_4693967_G_A	4693967	0	36	A	G	0.014	436664.2	61020.15	4.012093e-08	4.481637e-09	4.648295e-05
3	3_4699780_T_C	4699780	0	36	C	T	0.014	321853.0	80387.58	0.0003465485	0.0001315578	0.001525498
3	3_4768756_A_G	4768756	0	36	G	A	0.028	400526.3	10158.92	1.061351e-28	2.042744e-32	1.294467e-06
3	3_4817057_T_C	4817057	0	36	C	T	0.958	-267594.3	35617.99	1.486806e-08	1.451311e-09	3.621423e-05
3	3_4887686_A_T	4887686	0	36	T	A	0.014	436664.2	61020.15	4.012093e-08	4.481637e-09	4.648295e-05
3	3_8496659_T_C	8496659	0	36	C	T	0.028	221560.2	58697.0	0.0006567075	0.0002714036	0.002195554
3	3_9099863_G_A	9099863	0	36	A	G	0.014	436664.2	61020.15	4.012093e-08	4.481637e-09	4.648295e-05
3	3_9101818_G_T	9101818	0	36	T	G	0.028	231936.7	59560.94	0.0004711466	0.0001863175	0.001812379
3	3_9412826_G_A	9412826	0	36	A	G	0.014	436664.2	61020.15	4.012093e-08	4.481637e-09	4.648295e-05
3	3_9432191_GA_G	9432191	0	36	G	GA	0.014	321853.0	80387.58	0.0003465485	0.0001315578	0.001525498
3	3_9432252_T_C	9432252	0	36	C	T	0.014	436664.2	61020.15	4.012093e-08	4.481637e-09	4.648295e-05
3	3_9908712_G_C	9908712	0	36	C	G	0.014	321853.0	80387.58	0.0003465485	0.0001315578	0.001525498
3	3_9908721_C_A	9908721	0	36	A	C	0.014	321853.0	80387.58	0.0003465485	0.0001315578	0.001525498
3	3_9952347_C_A	9952347	0	36	A	C	0.014	436664.2	61020.15	4.012093e-08	4.481637e-09	4.648295e-05
3	3_9971966_C_T	9971966	0	36	T	C	0.014	436664.2	61020.15	4.012093e-08	4.481637e-09	4.648295e-05
3	3_9988175_C_T	9988175	0	36	T	C	0.014	321853.0	80387.58	0.0003465485	0.0001315578	0.001525498
3	3_9991388_G_C	9991388	0	36	C	G	0.986	-321853.0	80387.58	0.0003465485	0.0001315578	0.001525498
3	3_9991425_G_A	9991425	0	36	A	G	0.014	321853.0	80387.58	0.0003465485	0.0001315578	0.001525498
3	3_10119928_A_G	10119928	0	36	G	A	0.014	321853.0	80387.58	0.0003465485	0.0001315578	0.001525498
3	3_10157232_A_G	10157232	0	36	G	A	0.014	321853.0	80387.58	0.0003465485	0.0001315578	0.001525498
3	3_10370872_C_A	10370872	0	36	A	C	0.028	221553.1	58681.38	0.0006551038	0.000270653	0.002192408
3	3_10370887_T_G	10370887	0	36	G	T	0.028	208171.6	61328.22	0.001850456	0.0008768922	0.004152961
3	3_10861384_T_C	10861384	0	36	C	T	0.014	436664.2	61020.15	4.012093e-08	4.481637e-09	4.648295e-05
3	3_11643465_T_C	11643465	0	36	C	T	0.986	-321853.0	80387.58	0.0003465485	0.0001315578	0.001525498
3	3_12779409_A_G	12779409	0	36	G	A	0.833	-113915.4	21262.47	7.019235e-06	1.578704e-06	0.0002456059
3	3_12790332_C_G	12790332	0	36	G	C	0.014	321853.0	80387.58	0.0003465485	0.0001315578	0.001525498
3	3_13384824_T_G	13384824	0	36	G	T	0.014	436664.2	61020.15	4.012093e-08	4.481637e-09	4.648295e-05
3	3_13384827_A_G	13384827	0	36	G	A	0.014	436664.2	61020.15	4.012093e-08	4.481637e-09	4.648295e-05
3	3_13384832_T_G	13384832	0	36	G	T	0.014	436664.2	61020.15	4.012093e-08	4.481637e-09	4.648295e-05
3	3_13384836_T_G	13384836	0	36	G	T	0.014	436664.2	61020.15	4.012093e-08	4.481637e-09	4.648295e-05
3	3_13432844_G_A	13432844	0	36	A	G	0.014	436664.2	61020.15	4.012093e-08	4.481637e-09	4.648295e-05
3	3_13543274_C_T	13543274	0	36	T	C	0.014	436664.2	61020.15	4.012093e-08	4.481637e-09	4.648295e-05
3	3_13544593_C_T	13544593	0	36	T	C	0.014	436664.2	61020.15	4.012093e-08	4.481637e-09	4.648295e-05
3	3_13545697_C_T	13545697	0	36	T	C	0.014	436664.2	61020.15	4.012093e-08	4.481637e-09	4.648295e-05
3	3_13661104_A_C	13661104	0	36	C	A	0.069	179783.7	36616.19	2.581269e-05	6.919812e-06	0.0004226912
3	3_13670561_G_A	13670561	0	36	A	G	0.014	321853.0	80387.58	0.0003465485	0.0001315578	0.001525498
3	3_13672102_C_G	13672102	0	36	G	C	0.028	221553.1	58681.38	0.0006551038	0.000270653	0.002192408
3	3_13672400_A_G	13672400	0	36	G	A	0.028	221553.1	58681.38	0.0006551038	0.000270653	0.002192408
3	3_14526612_ATT_A	14526612	0	36	A	ATT	0.083	132986.3	37327.51	0.00117494	0.0005244341	0.003116856
3	3_14548899_C_A	14548899	0	36	A	C	0.014	321853.0	80387.58	0.0003465485	0.0001315578	0.001525498
3	3_14548946_G_A	14548946	0	36	A	G	0.014	321853.0	80387.58	0.0003465485	0.0001315578	0.001525498
3	3_14563323_G_A	14563323	0	36	A	G	0.014	321853.0	80387.58	0.0003465485	0.0001315578	0.001525498
3	3_14563326_C_A	14563326	0	36	A	C	0.014	321853.0	80387.58	0.0003465485	0.0001315578	0.001525498
3	3_14567272_T_C	14567272	0	36	C	T	0.014	321853.0	80387.58	0.0003465485	0.0001315578	0.001525498
3	3_14567382_C_T	14567382	0	36	T	C	0.014	321853.0	80387.58	0.0003465485	0.0001315578	0.001525498
3	3_14706570_G_A	14706570	0	36	A	G	0.014	436664.2	61020.15	4.012093e-08	4.481637e-09	4.648295e-05
3	3_14958562_C_G	14958562	0	36	G	C	0.014	321853.0	80387.58	0.0003465485	0.0001315578	0.001525498
3	3_15080602_TG_T	15080602	0	36	T	TG	0.028	208186.3	61328.14	0.001849249	0.0008762456	0.004151214
3	3_15283143_T_C	15283143	0	36	C	T	0.014	321853.0	80387.58	0.0003465485	0.0001315578	0.001525498
3	3_15292369_A_G	15292369	0	36	G	A	0.014	436664.2	61020.15	4.012093e-08	4.481637e-09	4.648295e-05
3	3_15292828_C_T	15292828	0	36	T	C	0.028	208170.9	61319.67	0.001848169	0.0008756665	0.004149649
3	3_15563178_C_T	15563178	0	36	T	C	0.139	103812.8	29299.53	0.001238994	0.000556913	0.003221167
3	3_15632995_AG_A	15632995	0	36	A	AG	0.014	436664.2	61020.15	4.012093e-08	4.481637e-09	4.648295e-05
3	3_15643175_G_A	15643175	0	36	A	G	0.125	137857.4	22910.72	1.032856e-06	1.792584e-07	0.0001220541
3	3_15686776_T_C	15686776	0	36	C	T	0.083	162880.1	34873.27	5.16286e-05	1.519251e-05	0.0005789344
3	3_16399111_C_CG	16399111	0	36	CG	C	0.028	218332.1	30510.07	4.012093e-08	4.481637e-09	4.648295e-05
3	3_16630243_T_C	16630243	0	36	C	T	0.028	208170.9	61319.67	0.001848169	0.0008756665	0.004149649
3	3_18459303_G_A	18459303	0	36	A	G	0.028	221553.1	58681.38	0.0006551038	0.000270653	0.002192408
3	3_19575232_C_T	19575232	0	36	T	C	0.028	208157.4	61270.85	0.001835922	0.0008691033	0.00413189
3	3_19977620_C_T	19977620	0	36	T	C	0.014	321853.0	80387.58	0.0003465485	0.0001315578	0.001525498
3	3_21448175_TAAAAA_T	21448175	0	36	T	TAAAAA	0.014	436664.2	61020.15	4.012093e-08	4.481637e-09	4.648295e-05
3	3_21448204_C_A	21448204	0	36	A	C	0.014	436664.2	61020.15	4.012093e-08	4.481637e-09	4.648295e-05
3	3_21448211_C_A	21448211	0	36	A	C	0.014	436664.2	61020.15	4.012093e-08	4.481637e-09	4.648295e-05
3	3_24234625_A_G	24234625	0	36	G	A	0.014	321853.0	80387.58	0.0003465485	0.0001315578	0.001525498
3	3_25470411_G_GA	25470411	0	36	GA	G	0.014	321853.0	80387.58	0.0003465485	0.0001315578	0.001525498
3	3_27329263_T_A	27329263	0	36	A	T	0.014	436664.2	61020.15	4.012093e-08	4.481637e-09	4.648295e-05
3	3_27338698_T_C	27338698	0	36	C	T	0.014	436664.2	61020.15	4.012093e-08	4.481637e-09	4.648295e-05
3	3_27431760_T_G	27431760	0	36	G	T	0.014	436664.2	61020.15	4.012093e-08	4.481637e-09	4.648295e-05
3	3_27431770_T_G	27431770	0	36	G	T	0.028	208165.6	61339.7	0.001854095	0.0008788437	0.004158229
3	3_27763405_CGCG_C	27763405	0	36	C	CGCG	0.028	221553.1	58681.38	0.0006551038	0.000270653	0.002192408
3	3_28562520_G_A	28562520	0	36	A	G	0.014	436664.2	61020.15	4.012093e-08	4.481637e-09	4.648295e-05
3	3_29922461_C_T	29922461	0	36	T	C	0.028	218332.1	30510.07	4.012093e-08	4.481637e-09	4.648295e-05
3	3_30686232_T_C	30686232	0	36	C	T	0.014	436664.2	61020.15	4.012093e-08	4.481637e-09	4.648295e-05
3	3_30898537_G_A	30898537	0	36	A	G	0.014	436664.2	61020.15	4.012093e-08	4.481637e-09	4.648295e-05
3	3_33432163_A_G	33432163	0	36	G	A	0.014	436664.2	61020.15	4.012093e-08	4.481637e-09	4.648295e-05
3	3_36779707_G_A	36779707	0	36	A	G	0.347	78146.7	22910.17	0.001769879	0.000833812	0.004035586
3	3_36870973_T_C	36870973	0	36	C	T	0.014	321853.0	80387.58	0.0003465485	0.0001315578	0.001525498
3	3_36898991_T_C	36898991	0	36	C	T	0.056	145561.3	32609.78	9.369796e-05	2.986714e-05	0.0007705953
3	3_37522828_G_A	37522828	0	36	A	G	0.181	100779.6	26582.97	0.0006273909	0.0002577218	0.002137659
3	3_37782969_C_T	37782969	0	36	T	C	0.014	321853.0	80387.58	0.0003465485	0.0001315578	0.001525498
3	3_38103776_G_A	38103776	0	36	A	G	0.014	321853.0	80387.58	0.0003465485	0.0001315578	0.001525498
3	3_38349245_G_A	38349245	0	36	A	G	0.014	436664.2	61020.15	4.012093e-08	4.481637e-09	4.648295e-05
3	3_38357776_C_T	38357776	0	36	T	C	0.014	436664.2	61020.15	4.012093e-08	4.481637e-09	4.648295e-05
3	3_38627174_C_A	38627174	0	36	A	C	0.014	436664.2	61020.15	4.012093e-08	4.481637e-09	4.648295e-05
3	3_38768212_G_A	38768212	0	36	A	G	0.014	321853.0	80387.58	0.0003465485	0.0001315578	0.001525498
3	3_39167072_G_A	39167072	0	36	A	G	0.014	436664.2	61020.15	4.012093e-08	4.481637e-09	4.648295e-05
3	3_39178437_G_T	39178437	0	36	T	G	0.028	208180.3	61358.86	0.001858164	0.0008810268	0.004164119
3	3_39179859_T_C	39179859	0	36	C	T	0.042	168183.8	51670.53	0.00268032	0.00133344	0.005296811
3	3_39225585_C_T	39225585	0	36	T	C	0.028	221561.8	58687.92	0.0006555987	0.0002708846	0.002193379
3	3_39229011_C_T	39229011	0	36	T	C	0.028	221561.8	58687.92	0.0006555987	0.0002708846	0.002193379
3	3_39230439_G_A	39230439	0	36	A	G	0.028	208180.3	61358.86	0.001858164	0.0008810268	0.004164119
3	3_40223616_C_G	40223616	0	36	G	C	0.014	321853.0	80387.58	0.0003465485	0.0001315578	0.001525498
3	3_40231688_G_A	40231688	0	36	A	G	0.014	436664.2	61020.15	4.012093e-08	4.481637e-09	4.648295e-05
3	3_41977548_G_A	41977548	0	36	A	G	0.014	321853.0	80387.58	0.0003465485	0.0001315578	0.001525498
3	3_42229398_A_T	42229398	0	36	T	A	0.028	208227.3	61337.8	0.001848587	0.0008758902	0.004150253
3	3_42229521_T_C	42229521	0	36	C	T	0.028	208227.3	61337.8	0.001848587	0.0008758902	0.004150253
3	3_42229527_G_T	42229527	0	36	T	G	0.028	208227.3	61337.8	0.001848587	0.0008758902	0.004150253
3	3_42230655_T_A	42230655	0	36	A	T	0.028	208227.3	61337.8	0.001848587	0.0008758902	0.004150253
3	3_42577207_A_G	42577207	0	36	G	A	0.708	-72730.14	21545.16	0.001945225	0.0009278739	0.004289316
3	3_42734597_C_G	42734597	0	36	G	C	0.014	436664.2	61020.15	4.012093e-08	4.481637e-09	4.648295e-05
3	3_42906509_C_G	42906509	0	36	G	C	0.014	436664.2	61020.15	4.012093e-08	4.481637e-09	4.648295e-05
3	3_44846493_G_A	44846493	0	36	A	G	0.014	321853.0	80387.58	0.0003465485	0.0001315578	0.001525498
3	3_45780326_T_G	45780326	0	36	G	T	0.014	321853.0	80387.58	0.0003465485	0.0001315578	0.001525498
3	3_45954758_G_T	45954758	0	36	T	G	0.014	321853.0	80387.58	0.0003465485	0.0001315578	0.001525498
3	3_46016895_C_T	46016895	0	36	T	C	0.014	436664.2	61020.15	4.012093e-08	4.481637e-09	4.648295e-05
3	3_46016925_G_A	46016925	0	36	A	G	0.014	436664.2	61020.15	4.012093e-08	4.481637e-09	4.648295e-05
3	3_46245566_T_G	46245566	0	36	G	T	0.014	321853.0	80387.58	0.0003465485	0.0001315578	0.001525498
3	3_46306765_C_T	46306765	0	36	T	C	0.014	436664.2	61020.15	4.012093e-08	4.481637e-09	4.648295e-05
3	3_46307313_A_G	46307313	0	36	G	A	0.014	436664.2	61020.15	4.012093e-08	4.481637e-09	4.648295e-05
3	3_46485144_C_T	46485144	0	36	T	C	0.014	436664.2	61020.15	4.012093e-08	4.481637e-09	4.648295e-05
3	3_46491584_A_G	46491584	0	36	G	A	0.014	436664.2	61020.15	4.012093e-08	4.481637e-09	4.648295e-05
3	3_46509869_C_A	46509869	0	36	A	C	0.014	436664.2	61020.15	4.012093e-08	4.481637e-09	4.648295e-05
3	3_46539807_G_A	46539807	0	36	A	G	0.014	436664.2	61020.15	4.012093e-08	4.481637e-09	4.648295e-05
3	3_46718298_A_C	46718298	0	36	C	A	0.028	225828.7	59591.41	0.0006300296	0.0002589499	0.002142905
3	3_46925004_CCGG_C	46925004	0	36	C	CCGG	0.028	221560.9	58687.06	0.0006555255	0.0002708503	0.002193236
3	3_47385129_C_T	47385129	0	36	T	C	0.014	321853.0	80387.58	0.0003465485	0.0001315578	0.001525498
3	3_47449516_G_T	47449516	0	36	T	G	0.014	436664.2	61020.15	4.012093e-08	4.481637e-09	4.648295e-05
3	3_47460626_AGT_A	47460626	0	36	A	AGT	0.028	247985.9	56789.25	0.0001237164	4.093123e-05	0.0008851058
3	3_47460630_A_C	47460630	0	36	C	A	0.028	247985.9	56789.25	0.0001237164	4.093123e-05	0.0008851058
3	3_47823347_C_T	47823347	0	36	T	C	0.014	436664.2	61020.15	4.012093e-08	4.481637e-09	4.648295e-05
3	3_47888819_C_T	47888819	0	36	T	C	0.014	436664.2	61020.15	4.012093e-08	4.481637e-09	4.648295e-05
3	3_48506220_C_G	48506220	0	36	G	C	0.014	436664.2	61020.15	4.012093e-08	4.481637e-09	4.648295e-05
3	3_48507182_A_G	48507182	0	36	G	A	0.014	321853.0	80387.58	0.0003465485	0.0001315578	0.001525498
3	3_48600230_C_T	48600230	0	36	T	C	0.014	436664.2	61020.15	4.012093e-08	4.481637e-09	4.648295e-05
3	3_48610900_A_T	48610900	0	36	T	A	0.014	321853.0	80387.58	0.0003465485	0.0001315578	0.001525498
3	3_48625914_C_T	48625914	0	36	T	C	0.014	436664.2	61020.15	4.012093e-08	4.481637e-09	4.648295e-05
3	3_49011025_AG_A	49011025	0	36	A	AG	0.028	400526.3	10158.92	1.061351e-28	2.042744e-32	1.294467e-06
3	3_49011026_G_A	49011026	0	36	A	G	0.444	-198791.8	36940.15	6.547825e-06	1.458918e-06	0.0002389804
3	3_49689588_C_T	49689588	0	36	T	C	0.014	436664.2	61020.15	4.012093e-08	4.481637e-09	4.648295e-05
3	3_50095151_G_T	50095151	0	36	T	G	0.028	208186.3	61328.14	0.001849249	0.0008762456	0.004151214
3	3_50212512_G_T	50212512	0	36	T	G	0.333	85476.26	25817.76	0.002312416	0.001128357	0.00480254
3	3_50222926_T_A	50222926	0	36	A	T	0.667	-85476.26	25817.76	0.002312416	0.001128357	0.00480254
3	3_50224225_A_G	50224225	0	36	G	A	0.667	-85476.26	25817.76	0.002312416	0.001128357	0.00480254
3	3_50295098_C_T	50295098	0	36	T	C	0.014	321853.0	80387.58	0.0003465485	0.0001315578	0.001525498
3	3_50402659_CTGA_C	50402659	0	36	C	CTGA	0.028	221561.8	58687.92	0.0006555987	0.0002708846	0.002193379
3	3_50418352_C_T	50418352	0	36	T	C	0.014	321853.0	80387.58	0.0003465485	0.0001315578	0.001525498
3	3_51350112_T_A	51350112	0	36	A	T	0.014	321853.0	80387.58	0.0003465485	0.0001315578	0.001525498
3	3_51668102_C_T	51668102	0	36	T	C	0.014	321853.0	80387.58	0.0003465485	0.0001315578	0.001525498
3	3_52391530_G_A	52391530	0	36	A	G	0.014	436664.2	61020.15	4.012093e-08	4.481637e-09	4.648295e-05
3	3_52426600_G_A	52426600	0	36	A	G	0.014	436664.2	61020.15	4.012093e-08	4.481637e-09	4.648295e-05
3	3_52437356_A_C	52437356	0	36	C	A	0.014	436664.2	61020.15	4.012093e-08	4.481637e-09	4.648295e-05
3	3_52507794_G_A	52507794	0	36	A	G	0.014	436664.2	61020.15	4.012093e-08	4.481637e-09	4.648295e-05
3	3_52526534_C_T	52526534	0	36	T	C	0.014	321853.0	80387.58	0.0003465485	0.0001315578	0.001525498
3	3_52552935_CTGCGCGCCATT_C	52552935	0	36	C	CTGCGCGCCATT	0.014	321853.0	80387.58	0.0003465485	0.0001315578	0.001525498
3	3_52889351_G_C	52889351	0	36	C	G	0.042	267176.0	37231.14	3.792763e-08	4.204415e-09	4.580698e-05
3	3_53218708_G_A	53218708	0	36	A	G	0.014	436664.2	61020.15	4.012093e-08	4.481637e-09	4.648295e-05
3	3_53219611_C_T	53219611	0	36	T	C	0.014	436664.2	61020.15	4.012093e-08	4.481637e-09	4.648295e-05
3	3_53744462_A_G	53744462	0	36	G	A	0.014	321853.0	80387.58	0.0003465485	0.0001315578	0.001525498
3	3_53852317_G_T	53852317	0	36	T	G	0.014	321853.0	80387.58	0.0003465485	0.0001315578	0.001525498
3	3_53853041_C_G	53853041	0	36	G	C	0.014	321853.0	80387.58	0.0003465485	0.0001315578	0.001525498
3	3_53855738_G_C	53855738	0	36	C	G	0.028	208157.4	61270.85	0.001835922	0.0008691033	0.00413189
3	3_54914923_G_A	54914923	0	36	A	G	0.014	436664.2	61020.15	4.012093e-08	4.481637e-09	4.648295e-05
3	3_54933872_A_G	54933872	0	36	G	A	0.014	321853.0	80387.58	0.0003465485	0.0001315578	0.001525498
3	3_55754151_T_C	55754151	0	36	C	T	0.014	321853.0	80387.58	0.0003465485	0.0001315578	0.001525498
3	3_55754153_TTCTTCC_T	55754153	0	36	T	TTCTTCC	0.028	160926.5	40193.79	0.0003465485	0.0001315578	0.001525498
3	3_56707461_CAAAAAA_CAAA	56707461	0	36	CAAA	CAAAAAA	0.028	218158.8	59752.88	0.0009231345	0.0003991138	0.002689258
3	3_56716752_G_A	56716752	0	36	A	G	0.014	436664.2	61020.15	4.012093e-08	4.481637e-09	4.648295e-05
3	3_57176502_C_T	57176502	0	36	T	C	0.014	321853.0	80387.58	0.0003465485	0.0001315578	0.001525498
3	3_57294224_A_G	57294224	0	36	G	A	0.014	436664.2	61020.15	4.012093e-08	4.481637e-09	4.648295e-05
3	3_57394375_A_G	57394375	0	36	G	A	0.028	208174.9	61332.04	0.001851238	0.0008773119	0.004154094
3	3_58131608_T_C	58131608	0	36	C	T	0.014	436664.2	61020.15	4.012093e-08	4.481637e-09	4.648295e-05
3	3_58196318_C_T	58196318	0	36	T	C	0.014	321853.0	80387.58	0.0003465485	0.0001315578	0.001525498
3	3_58196583_G_A	58196583	0	36	A	G	0.014	321853.0	80387.58	0.0003465485	0.0001315578	0.001525498
3	3_58552541_G_A	58552541	0	36	A	G	0.014	321853.0	80387.58	0.0003465485	0.0001315578	0.001525498
3	3_59999616_G_T	59999616	0	36	T	G	0.014	321853.0	80387.58	0.0003465485	0.0001315578	0.001525498
3	3_61911495_G_A	61911495	0	36	A	G	0.069	130032.7	31109.79	0.0002107829	7.488546e-05	0.001165674
3	3_62258871_G_A	62258871	0	36	A	G	0.167	109529.9	20734.11	8.732122e-06	2.022707e-06	0.000267912
3	3_62318916_A_AT	62318916	0	36	AT	A	0.014	321853.0	80387.58	0.0003465485	0.0001315578	0.001525498
3	3_62358566_C_A	62358566	0	36	A	C	0.014	436664.2	61020.15	4.012093e-08	4.481637e-09	4.648295e-05
3	3_62455435_G_C	62455435	0	36	C	G	0.014	436664.2	61020.15	4.012093e-08	4.481637e-09	4.648295e-05
3	3_62459813_G_GA	62459813	0	36	GA	G	0.014	321853.0	80387.58	0.0003465485	0.0001315578	0.001525498
3	3_62578336_C_T	62578336	0	36	T	C	0.014	436664.2	61020.15	4.012093e-08	4.481637e-09	4.648295e-05
3	3_63983382_A_AT	63983382	0	36	AT	A	0.014	436664.2	61020.15	4.012093e-08	4.481637e-09	4.648295e-05
3	3_64507913_T_C	64507913	0	36	C	T	0.014	321853.0	80387.58	0.0003465485	0.0001315578	0.001525498
3	3_64601144_G_A	64601144	0	36	A	G	0.014	321853.0	80387.58	0.0003465485	0.0001315578	0.001525498
3	3_64617037_G_C	64617037	0	36	C	G	0.042	175938.4	31560.74	3.73185e-06	7.706625e-07	0.0001926615
3	3_65439022_T_A	65439022	0	36	A	T	0.014	321853.0	80387.58	0.0003465485	0.0001315578	0.001525498
3	3_66271323_C_G	66271323	0	36	G	C	0.028	221575.6	58618.45	0.0006471075	0.0002669143	0.002176689
3	3_66354915_G_A	66354915	0	36	A	G	0.028	221575.6	58618.45	0.0006471075	0.0002669143	0.002176689
3	3_66354979_C_A	66354979	0	36	A	C	0.028	221575.6	58618.45	0.0006471075	0.0002669143	0.002176689
3	3_66406438_AT_A	66406438	0	36	A	AT	0.028	221575.6	58618.45	0.0006471075	0.0002669143	0.002176689
3	3_66406571_T_A	66406571	0	36	A	T	0.028	221575.6	58618.45	0.0006471075	0.0002669143	0.002176689
3	3_66419760_A_T	66419760	0	36	T	A	0.028	221561.8	58687.92	0.0006555987	0.0002708846	0.002193379
3	3_66420093_G_A	66420093	0	36	A	G	0.028	221575.6	58618.45	0.0006471075	0.0002669143	0.002176689
3	3_66432847_A_C	66432847	0	36	C	A	0.028	221575.6	58618.45	0.0006471075	0.0002669143	0.002176689
3	3_66432969_C_G	66432969	0	36	G	C	0.028	221575.6	58618.45	0.0006471075	0.0002669143	0.002176689
3	3_66433735_G_A	66433735	0	36	A	G	0.028	221575.6	58618.45	0.0006471075	0.0002669143	0.002176689
3	3_66465259_T_C	66465259	0	36	C	T	0.639	-66703.84	19887.04	0.002060473	0.0009903085	0.00445285
3	3_67048773_T_G	67048773	0	36	G	T	0.014	321853.0	80387.58	0.0003465485	0.0001315578	0.001525498
3	3_67459357_A_G	67459357	0	36	G	A	0.014	436664.2	61020.15	4.012093e-08	4.481637e-09	4.648295e-05
3	3_69074878_A_G	69074878	0	36	G	A	0.083	129587.7	38500.88	0.001997167	0.0009559551	0.004363319
3	3_69299185_C_A	69299185	0	36	A	C	0.028	208174.9	61332.04	0.001851238	0.0008773119	0.004154094
3	3_71007347_CAA_C	71007347	0	36	C	CAA	0.028	221575.6	58618.45	0.0006471075	0.0002669143	0.002176689
3	3_71103122_T_C	71103122	0	36	C	T	0.014	321853.0	80387.58	0.0003465485	0.0001315578	0.001525498
3	3_73440285_T_C	73440285	0	36	C	T	0.014	321853.0	80387.58	0.0003465485	0.0001315578	0.001525498
3	3_74334560_C_T	74334560	0	36	T	C	0.028	208227.3	61337.8	0.001848587	0.0008758902	0.004150253
3	3_77613454_G_A	77613454	0	36	A	G	0.014	321853.0	80387.58	0.0003465485	0.0001315578	0.001525498
3	3_78735014_G_A	78735014	0	36	A	G	0.014	436664.2	61020.15	4.012093e-08	4.481637e-09	4.648295e-05
3	3_85775566_A_G	85775566	0	36	G	A	0.014	321853.0	80387.58	0.0003465485	0.0001315578	0.001525498
3	3_97516927_A_G	97516927	0	36	G	A	0.014	436664.2	61020.15	4.012093e-08	4.481637e-09	4.648295e-05
3	3_97677897_T_G	97677897	0	36	G	T	0.014	436664.2	61020.15	4.012093e-08	4.481637e-09	4.648295e-05
3	3_97868524_A_T	97868524	0	36	T	A	0.014	321853.0	80387.58	0.0003465485	0.0001315578	0.001525498
3	3_97926706_G_C	97926706	0	36	C	G	0.028	225828.7	59591.41	0.0006300296	0.0002589499	0.002142905
3	3_97926707_G_A	97926707	0	36	A	G	0.014	436664.2	61020.15	4.012093e-08	4.481637e-09	4.648295e-05
3	3_98001858_A_G	98001858	0	36	G	A	0.014	321853.0	80387.58	0.0003465485	0.0001315578	0.001525498
3	3_98073093_C_G	98073093	0	36	G	C	0.014	436664.2	61020.15	4.012093e-08	4.481637e-09	4.648295e-05
3	3_98110009_C_T	98110009	0	36	T	C	0.014	436664.2	61020.15	4.012093e-08	4.481637e-09	4.648295e-05
3	3_98241847_G_C	98241847	0	36	C	G	0.069	127263.2	31555.15	0.000319154	0.0001198367	0.0014578
3	3_100593659_T_C	100593659	0	36	C	T	0.014	321853.0	80387.58	0.0003465485	0.0001315578	0.001525498
3	3_101022876_T_C	101022876	0	36	C	T	0.111	112946.6	33743.47	0.002098831	0.001011191	0.004506755
3	3_101085208_A_G	101085208	0	36	G	A	0.069	179770.0	36611.39	2.579238e-05	6.913635e-06	0.0004225447
3	3_101177901_GA_G	101177901	0	36	G	GA	0.083	143642.7	36717.93	0.000448108	0.0001760297	0.001761533
3	3_108158440_G_T	108158440	0	36	T	G	0.014	436664.2	61020.15	4.012093e-08	4.481637e-09	4.648295e-05
3	3_109049384_T_C	109049384	0	36	C	T	0.153	87040.06	26611.83	0.002570861	0.001272017	0.005151576
3	3_110401160_C_G	110401160	0	36	G	C	0.014	436664.2	61020.15	4.012093e-08	4.481637e-09	4.648295e-05
3	3_110796191_T_TAAAAAAAAAAA	110796191	0	36	TAAAAAAAAAAA	T	0.028	218332.1	30510.07	4.012093e-08	4.481637e-09	4.648295e-05
3	3_111342815_C_T	111342815	0	36	T	C	0.014	436664.2	61020.15	4.012093e-08	4.481637e-09	4.648295e-05
3	3_111775885_C_T	111775885	0	36	T	C	0.014	321853.0	80387.58	0.0003465485	0.0001315578	0.001525498
3	3_111873802_T_C	111873802	0	36	C	T	0.014	321853.0	80387.58	0.0003465485	0.0001315578	0.001525498
3	3_112066325_T_A	112066325	0	36	A	T	0.014	436664.2	61020.15	4.012093e-08	4.481637e-09	4.648295e-05
3	3_112185290_T_C	112185290	0	36	C	T	0.014	436664.2	61020.15	4.012093e-08	4.481637e-09	4.648295e-05
3	3_112188742_C_T	112188742	0	36	T	C	0.014	321853.0	80387.58	0.0003465485	0.0001315578	0.001525498
3	3_112727085_C_T	112727085	0	36	T	C	0.014	436664.2	61020.15	4.012093e-08	4.481637e-09	4.648295e-05
3	3_112993367_G_A	112993367	0	36	A	G	0.194	94333.25	24932.6	0.0006407446	0.0002639437	0.002164136
3	3_113004155_G_A	113004155	0	36	A	G	0.181	101494.1	24636.97	0.0002499906	9.086005e-05	0.001276669
3	3_113027214_A_C	113027214	0	36	C	A	0.778	-82567.14	23546.17	0.001368045	0.0006230099	0.003426793
3	3_113045561_A_G	113045561	0	36	G	A	0.153	105031.0	24830.19	0.0001827813	6.371277e-05	0.001081511
3	3_113046640_A_G	113046640	0	36	G	A	0.125	122619.2	25714.31	3.889764e-05	1.101894e-05	0.0005079776
3	3_113207968_CT_C	113207968	0	36	C	CT	0.014	436664.2	61020.15	4.012093e-08	4.481637e-09	4.648295e-05
3	3_113442784_C_CA	113442784	0	36	CA	C	0.014	436664.2	61020.15	4.012093e-08	4.481637e-09	4.648295e-05
3	3_113443021_T_A	113443021	0	36	A	T	0.014	321853.0	80387.58	0.0003465485	0.0001315578	0.001525498
3	3_114014301_T_C	114014301	0	36	C	T	0.028	208173.6	61339.8	0.001853476	0.0008785118	0.004157334
3	3_118269415_T_A	118269415	0	36	A	T	0.028	208179.4	61352.55	0.001856499	0.0008801335	0.00416171
3	3_118867192_TTTAA_T	118867192	0	36	T	TTTAA	0.028	208174.8	61334.78	0.001851996	0.0008777182	0.004155191
3	3_119084126_C_A	119084126	0	36	A	C	0.028	221560.9	58687.06	0.0006555255	0.0002708503	0.002193236
3	3_119109769_C_T	119109769	0	36	T	C	0.014	436664.2	61020.15	4.012093e-08	4.481637e-09	4.648295e-05
3	3_119210426_G_A	119210426	0	36	A	G	0.014	436664.2	61020.15	4.012093e-08	4.481637e-09	4.648295e-05
3	3_119236173_T_C	119236173	0	36	C	T	0.014	321853.0	80387.58	0.0003465485	0.0001315578	0.001525498
3	3_119336839_C_T	119336839	0	36	T	C	0.014	321853.0	80387.58	0.0003465485	0.0001315578	0.001525498
3	3_119338287_C_T	119338287	0	36	T	C	0.083	109629.1	31479.28	0.001459842	0.00067053	0.003569749
3	3_119338863_CA_C	119338863	0	36	C	CA	0.028	221562.2	58701.93	0.0006572218	0.0002716443	0.002196562
3	3_119339063_TCC_T	119339063	0	36	T	TCC	0.014	321853.0	80387.58	0.0003465485	0.0001315578	0.001525498
3	3_119339138_C_A	119339138	0	36	A	C	0.083	109629.1	31479.28	0.001459842	0.00067053	0.003569749
3	3_119905791_T_G	119905791	0	36	G	T	0.056	144661.5	32317.82	9.039839e-05	2.867727e-05	0.0007571317
3	3_121304757_G_T	121304757	0	36	T	G	0.014	436664.2	61020.15	4.012093e-08	4.481637e-09	4.648295e-05
3	3_121409654_G_A	121409654	0	36	A	G	0.014	436664.2	61020.15	4.012093e-08	4.481637e-09	4.648295e-05
3	3_121515953_G_T	121515953	0	36	T	G	0.014	321853.0	80387.58	0.0003465485	0.0001315578	0.001525498
3	3_121605160_A_C	121605160	0	36	C	A	0.014	321853.0	80387.58	0.0003465485	0.0001315578	0.001525498
3	3_121631887_C_T	121631887	0	36	T	C	0.014	321853.0	80387.58	0.0003465485	0.0001315578	0.001525498
3	3_122439463_A_G	122439463	0	36	G	A	0.014	321853.0	80387.58	0.0003465485	0.0001315578	0.001525498
3	3_122605914_G_A	122605914	0	36	A	G	0.014	321853.0	80387.58	0.0003465485	0.0001315578	0.001525498
3	3_122630291_G_A	122630291	0	36	A	G	0.014	321853.0	80387.58	0.0003465485	0.0001315578	0.001525498
3	3_123456102_T_G	123456102	0	36	G	T	0.014	321853.0	80387.58	0.0003465485	0.0001315578	0.001525498
3	3_123663898_A_C	123663898	0	36	C	A	0.014	436664.2	61020.15	4.012093e-08	4.481637e-09	4.648295e-05
3	3_124450183_G_A	124450183	0	36	A	G	0.014	436664.2	61020.15	4.012093e-08	4.481637e-09	4.648295e-05
3	3_124485259_G_A	124485259	0	36	A	G	0.014	436664.2	61020.15	4.012093e-08	4.481637e-09	4.648295e-05
3	3_124560505_C_A	124560505	0	36	A	C	0.028	208170.5	61305.18	0.001844241	0.000873561	0.004143957
3	3_124629143_G_T	124629143	0	36	T	G	0.014	436664.2	61020.15	4.012093e-08	4.481637e-09	4.648295e-05
3	3_124810325_C_T	124810325	0	36	T	C	0.014	436664.2	61020.15	4.012093e-08	4.481637e-09	4.648295e-05
3	3_125199103_A_G	125199103	0	36	G	A	0.028	208180.3	61358.86	0.001858164	0.0008810268	0.004164119
3	3_125878248_C_T	125878248	0	36	T	C	0.014	436664.2	61020.15	4.012093e-08	4.481637e-09	4.648295e-05
3	3_126154464_G_A	126154464	0	36	A	G	0.014	436664.2	61020.15	4.012093e-08	4.481637e-09	4.648295e-05
3	3_126218903_C_T	126218903	0	36	T	C	0.014	321853.0	80387.58	0.0003465485	0.0001315578	0.001525498
3	3_126363125_T_C	126363125	0	36	C	T	0.014	321853.0	80387.58	0.0003465485	0.0001315578	0.001525498
3	3_126365123_TAAAC_T	126365123	0	36	T	TAAAC	0.014	321853.0	80387.58	0.0003465485	0.0001315578	0.001525498
3	3_127439768_C_T	127439768	0	36	T	C	0.014	436664.2	61020.15	4.012093e-08	4.481637e-09	4.648295e-05
3	3_128344508_AAG_A	128344508	0	36	A	AAG	0.014	321853.0	80387.58	0.0003465485	0.0001315578	0.001525498
3	3_128627259_T_C	128627259	0	36	C	T	0.083	133548.9	40496.56	0.0023933	0.001173104	0.004912754
3	3_128631671_C_T	128631671	0	36	T	C	0.014	436664.2	61020.15	4.012093e-08	4.481637e-09	4.648295e-05
3	3_128853062_C_T	128853062	0	36	T	C	0.014	321853.0	80387.58	0.0003465485	0.0001315578	0.001525498
3	3_128992863_G_A	128992863	0	36	A	G	0.028	208157.4	61270.85	0.001835922	0.0008691033	0.00413189
3	3_129121514_C_T	129121514	0	36	T	C	0.014	436664.2	61020.15	4.012093e-08	4.481637e-09	4.648295e-05
3	3_129152144_T_C	129152144	0	36	C	T	0.681	-93371.98	27245.01	0.001694968	0.0007939899	0.003925193
3	3_130095761_T_C	130095761	0	36	C	T	0.014	321853.0	80387.58	0.0003465485	0.0001315578	0.001525498
3	3_130120457_C_T	130120457	0	36	T	C	0.014	436664.2	61020.15	4.012093e-08	4.481637e-09	4.648295e-05
3	3_130279249_A_T	130279249	0	36	T	A	0.014	321853.0	80387.58	0.0003465485	0.0001315578	0.001525498
3	3_130285880_C_T	130285880	0	36	T	C	0.014	436664.2	61020.15	4.012093e-08	4.481637e-09	4.648295e-05
3	3_130649190_TTTA_T	130649190	0	36	T	TTTA	0.014	436664.2	61020.15	4.012093e-08	4.481637e-09	4.648295e-05
3	3_130672769_G_A	130672769	0	36	A	G	0.014	436664.2	61020.15	4.012093e-08	4.481637e-09	4.648295e-05
3	3_130733251_A_C	130733251	0	36	C	A	0.014	436664.2	61020.15	4.012093e-08	4.481637e-09	4.648295e-05
3	3_130962144_T_C	130962144	0	36	C	T	0.028	229399.0	59570.43	0.0005314595	0.000213559	0.00194166
3	3_130992385_T_C	130992385	0	36	C	T	0.083	141702.8	35439.58	0.00035178	0.0001338105	0.001538205
3	3_131254230_T_A	131254230	0	36	A	T	0.014	436664.2	61020.15	4.012093e-08	4.481637e-09	4.648295e-05
3	3_131274305_G_T	131274305	0	36	T	G	0.014	436664.2	61020.15	4.012093e-08	4.481637e-09	4.648295e-05
3	3_132153243_C_A	132153243	0	36	A	C	0.056	202184.2	38572.87	9.838671e-06	2.31602e-06	0.0002811348
3	3_132175778_C_T	132175778	0	36	T	C	0.014	321853.0	80387.58	0.0003465485	0.0001315578	0.001525498
3	3_132175779_C_A	132175779	0	36	A	C	0.014	321853.0	80387.58	0.0003465485	0.0001315578	0.001525498
3	3_132211285_C_T	132211285	0	36	T	C	0.028	208173.6	61339.8	0.001853476	0.0008785118	0.004157334
3	3_132218075_C_T	132218075	0	36	T	C	0.014	321853.0	80387.58	0.0003465485	0.0001315578	0.001525498
3	3_132224127_C_T	132224127	0	36	T	C	0.014	321853.0	80387.58	0.0003465485	0.0001315578	0.001525498
3	3_132319604_A_C	132319604	0	36	C	A	0.014	321853.0	80387.58	0.0003465485	0.0001315578	0.001525498
3	3_132436893_C_T	132436893	0	36	T	C	0.014	321853.0	80387.58	0.0003465485	0.0001315578	0.001525498
3	3_133342192_C_T	133342192	0	36	T	C	0.028	221562.2	58701.93	0.0006572218	0.0002716443	0.002196562
3	3_133475812_G_A	133475812	0	36	A	G	0.097	110224.3	30697.89	0.001088892	0.0004811689	0.002974094
3	3_133558472_A_G	133558472	0	36	G	A	0.014	321853.0	80387.58	0.0003465485	0.0001315578	0.001525498
3	3_133560580_G_A	133560580	0	36	A	G	0.028	221562.2	58701.93	0.0006572218	0.0002716443	0.002196562
3	3_133878367_C_T	133878367	0	36	T	C	0.014	436664.2	61020.15	4.012093e-08	4.481637e-09	4.648295e-05
3	3_133896935_A_G	133896935	0	36	G	A	0.014	436664.2	61020.15	4.012093e-08	4.481637e-09	4.648295e-05
3	3_134250895_A_G	134250895	0	36	G	A	0.014	436664.2	61020.15	4.012093e-08	4.481637e-09	4.648295e-05
3	3_134270649_G_GTA	134270649	0	36	GTA	G	0.014	436664.2	61020.15	4.012093e-08	4.481637e-09	4.648295e-05
3	3_134327755_G_T	134327755	0	36	T	G	0.014	436664.2	61020.15	4.012093e-08	4.481637e-09	4.648295e-05
3	3_135721036_C_T	135721036	0	36	T	C	0.014	436664.2	61020.15	4.012093e-08	4.481637e-09	4.648295e-05
3	3_137805896_C_G	137805896	0	36	G	C	0.014	436664.2	61020.15	4.012093e-08	4.481637e-09	4.648295e-05
3	3_137850269_TA_T	137850269	0	36	T	TA	0.014	436664.2	61020.15	4.012093e-08	4.481637e-09	4.648295e-05
3	3_138091857_C_T	138091857	0	36	T	C	0.014	321853.0	80387.58	0.0003465485	0.0001315578	0.001525498
3	3_139346684_C_G	139346684	0	36	G	C	0.222	78273.57	20664.79	0.0006332549	0.0002604519	0.002149308
3	3_141299334_A_G	141299334	0	36	G	A	0.014	321853.0	80387.58	0.0003465485	0.0001315578	0.001525498
3	3_141622630_G_GT	141622630	0	36	GT	G	0.014	321853.0	80387.58	0.0003465485	0.0001315578	0.001525498
3	3_141635432_A_G	141635432	0	36	G	A	0.014	436664.2	61020.15	4.012093e-08	4.481637e-09	4.648295e-05
3	3_141892066_C_CA	141892066	0	36	CA	C	0.028	229399.0	59570.43	0.0005314595	0.000213559	0.00194166
3	3_141896553_C_T	141896553	0	36	T	C	0.028	229399.0	59570.43	0.0005314595	0.000213559	0.00194166
3	3_142030710_G_A	142030710	0	36	A	G	0.028	229399.0	59570.43	0.0005314595	0.000213559	0.00194166
3	3_142234404_T_C	142234404	0	36	C	T	0.014	436664.2	61020.15	4.012093e-08	4.481637e-09	4.648295e-05
3	3_142257306_T_C	142257306	0	36	C	T	0.014	436664.2	61020.15	4.012093e-08	4.481637e-09	4.648295e-05
3	3_142259898_C_G	142259898	0	36	G	C	0.014	321853.0	80387.58	0.0003465485	0.0001315578	0.001525498
3	3_142277365_AAAATAAATAAAT_AAAAT	142277365	0	36	AAAAT	AAAATAAATAAAT	0.028	218158.8	59752.88	0.0009231345	0.0003991138	0.002689258
3	3_142297554_CTGCG_C	142297554	0	36	C	CTGCG	0.014	436664.2	61020.15	4.012093e-08	4.481637e-09	4.648295e-05
3	3_142297559_AGGCACTAGTCAACCACGCCAACGCGGGTTCCCG_A	142297559	0	36	A	AGGCACTAGTCAACCACGCCAACGCGGGTTCCCG	0.014	436664.2	61020.15	4.012093e-08	4.481637e-09	4.648295e-05
3	3_142394953_A_G	142394953	0	36	G	A	0.014	436664.2	61020.15	4.012093e-08	4.481637e-09	4.648295e-05
3	3_142402915_C_T	142402915	0	36	T	C	0.014	436664.2	61020.15	4.012093e-08	4.481637e-09	4.648295e-05
3	3_142739630_A_G	142739630	0	36	G	A	0.028	208171.0	61320.19	0.001848308	0.0008757407	0.004149849
3	3_142753863_T_G	142753863	0	36	G	T	0.083	131997.0	38812.2	0.001818389	0.0008597179	0.004106414
3	3_143530497_A_G	143530497	0	36	G	A	0.319	68228.68	20376.45	0.002092163	0.001007557	0.004497403
3	3_145804771_T_G	145804771	0	36	G	T	0.014	321853.0	80387.58	0.0003465485	0.0001315578	0.001525498
3	3_148750169_G_GA	148750169	0	36	GA	G	0.014	436664.2	61020.15	4.012093e-08	4.481637e-09	4.648295e-05
3	3_148766666_T_C	148766666	0	36	C	T	0.069	127347.0	31596.4	0.0003215105	0.0001208399	0.001463703
3	3_148901395_TA_T	148901395	0	36	T	TA	0.014	436664.2	61020.15	4.012093e-08	4.481637e-09	4.648295e-05
3	3_148925418_G_A	148925418	0	36	A	G	0.014	321853.0	80387.58	0.0003465485	0.0001315578	0.001525498
3	3_149469333_AT_A	149469333	0	36	A	AT	0.014	321853.0	80387.58	0.0003465485	0.0001315578	0.001525498
3	3_149679014_T_G	149679014	0	36	G	T	0.028	208163.7	61322.74	0.001849597	0.0008764316	0.004151716
3	3_150420057_CTTT_CTTTT	150420057	1	35	CTTTT	CTTT	0.029	218165.0	30531.9	4.132911e-08	4.635233e-09	4.684489e-05
3	3_151054437_C_T	151054437	0	36	T	C	0.028	208179.4	61352.55	0.001856499	0.0008801335	0.00416171
3	3_151150728_AC_A	151150728	0	36	A	AC	0.028	208173.6	61339.8	0.001853476	0.0008785118	0.004157334
3	3_153202484_C_T	153202484	0	36	T	C	0.014	436664.2	61020.15	4.012093e-08	4.481637e-09	4.648295e-05
3	3_154807720_G_A	154807720	0	36	A	G	0.028	208173.6	61339.8	0.001853476	0.0008785118	0.004157334
3	3_154898415_G_T	154898415	0	36	T	G	0.028	221559.7	58704.62	0.0006576145	0.0002718282	0.002197331
3	3_156177517_G_A	156177517	0	36	A	G	0.014	321853.0	80387.58	0.0003465485	0.0001315578	0.001525498
3	3_156192624_C_T	156192624	0	36	T	C	0.014	321853.0	80387.58	0.0003465485	0.0001315578	0.001525498
3	3_158450171_A_T	158450171	0	36	T	A	0.014	436664.2	61020.15	4.012093e-08	4.481637e-09	4.648295e-05
3	3_158983289_C_T	158983289	0	36	T	C	0.014	436664.2	61020.15	4.012093e-08	4.481637e-09	4.648295e-05
3	3_167402236_T_C	167402236	0	36	C	T	0.014	436664.2	61020.15	4.012093e-08	4.481637e-09	4.648295e-05
3	3_168819788_A_G	168819788	0	36	G	A	0.944	-199678.4	38928.95	1.364325e-05	3.356404e-06	0.0003216111
3	3_168840571_A_T	168840571	0	36	T	A	0.944	-197372.8	38389.36	1.317366e-05	3.22561e-06	0.0003169533
3	3_169550822_G_A	169550822	0	36	A	G	0.014	436664.2	61020.15	4.012093e-08	4.481637e-09	4.648295e-05
3	3_169642771_A_T	169642771	0	36	T	A	0.014	321853.0	80387.58	0.0003465485	0.0001315578	0.001525498
3	3_169642783_A_T	169642783	0	36	T	A	0.042	274986.7	34398.04	3.987005e-09	3.254539e-10	2.673876e-05
3	3_169835268_A_G	169835268	0	36	G	A	0.014	436664.2	61020.15	4.012093e-08	4.481637e-09	4.648295e-05
3	3_170150150_C_T	170150150	0	36	T	C	0.014	436664.2	61020.15	4.012093e-08	4.481637e-09	4.648295e-05
3	3_170784224_G_T	170784224	0	36	T	G	0.014	436664.2	61020.15	4.012093e-08	4.481637e-09	4.648295e-05
3	3_171362785_C_T	171362785	0	36	T	C	0.014	436664.2	61020.15	4.012093e-08	4.481637e-09	4.648295e-05
3	3_171426538_T_C	171426538	0	36	C	T	0.014	321853.0	80387.58	0.0003465485	0.0001315578	0.001525498
3	3_172025228_C_T	172025228	0	36	T	C	0.028	208186.3	61328.14	0.001849249	0.0008762456	0.004151214
3	3_172028460_A_T	172028460	0	36	T	A	0.139	108778.6	26102.02	0.0002183046	7.79216e-05	0.001187536
3	3_172028521_C_A	172028521	0	36	A	C	0.139	108778.6	26102.02	0.0002183046	7.79216e-05	0.001187536
3	3_172046675_T_C	172046675	0	36	C	T	0.014	321853.0	80387.58	0.0003465485	0.0001315578	0.001525498
3	3_177159963_A_C	177159963	0	36	C	A	0.403	-117467.0	35268.15	0.002193211	0.001062783	0.004638345
3	3_178919397_AT_A	178919397	0	36	A	AT	0.028	221560.8	58687.11	0.0006555339	0.0002708543	0.002193252
3	3_179527485_A_AT	179527485	0	36	AT	A	0.028	208227.3	61337.8	0.001848587	0.0008758902	0.004150253
3	3_182665193_T_C	182665193	0	36	C	T	0.014	436664.2	61020.15	4.012093e-08	4.481637e-09	4.648295e-05
3	3_183815218_A_G	183815218	0	36	G	A	0.014	321853.0	80387.58	0.0003465485	0.0001315578	0.001525498
3	3_183822504_CAAAAA_C	183822504	0	36	C	CAAAAA	0.014	436664.2	61020.15	4.012093e-08	4.481637e-09	4.648295e-05
3	3_183823375_C_G	183823375	0	36	G	C	0.014	436664.2	61020.15	4.012093e-08	4.481637e-09	4.648295e-05
3	3_183911280_G_A	183911280	0	36	A	G	0.014	436664.2	61020.15	4.012093e-08	4.481637e-09	4.648295e-05
3	3_184007330_G_A	184007330	0	36	A	G	0.014	321853.0	80387.58	0.0003465485	0.0001315578	0.001525498
3	3_184026376_G_A	184026376	0	36	A	G	0.014	436664.2	61020.15	4.012093e-08	4.481637e-09	4.648295e-05
3	3_184071136_G_A	184071136	0	36	A	G	0.014	436664.2	61020.15	4.012093e-08	4.481637e-09	4.648295e-05
3	3_184095976_C_T	184095976	0	36	T	C	0.014	436664.2	61020.15	4.012093e-08	4.481637e-09	4.648295e-05
3	3_184096161_G_T	184096161	0	36	T	G	0.014	436664.2	61020.15	4.012093e-08	4.481637e-09	4.648295e-05
3	3_184099271_C_CT	184099271	0	36	CT	C	0.014	436664.2	61020.15	4.012093e-08	4.481637e-09	4.648295e-05
3	3_184101429_C_T	184101429	0	36	T	C	0.014	436664.2	61020.15	4.012093e-08	4.481637e-09	4.648295e-05
3	3_184104738_G_A	184104738	0	36	A	G	0.014	436664.2	61020.15	4.012093e-08	4.481637e-09	4.648295e-05
3	3_184428903_T_G	184428903	0	36	G	T	0.75	-78580.65	23788.63	0.002358671	0.001153922	0.004865682
3	3_184429133_A_ATCC	184429133	0	36	ATCC	A	0.764	-82308.35	25096.51	0.002510804	0.001238458	0.005071261
3	3_184557636_T_C	184557636	0	36	C	T	0.028	208163.7	61322.74	0.001849597	0.0008764316	0.004151716
3	3_184642601_G_T	184642601	0	36	T	G	0.042	169997.5	51663.85	0.002440218	0.00119915	0.004976266
3	3_184711911_T_A	184711911	0	36	A	T	0.028	208163.7	61322.74	0.001849597	0.0008764316	0.004151716
3	3_185212898_G_A	185212898	0	36	A	G	0.014	321853.0	80387.58	0.0003465485	0.0001315578	0.001525498
3	3_186015199_C_T	186015199	0	36	T	C	0.014	321853.0	80387.58	0.0003465485	0.0001315578	0.001525498
3	3_186038065_G_A	186038065	0	36	A	G	0.014	436664.2	61020.15	4.012093e-08	4.481637e-09	4.648295e-05
3	3_186337825_C_A	186337825	0	36	A	C	0.014	321853.0	80387.58	0.0003465485	0.0001315578	0.001525498
3	3_186370454_C_T	186370454	0	36	T	C	0.014	436664.2	61020.15	4.012093e-08	4.481637e-09	4.648295e-05
3	3_186393095_T_A	186393095	0	36	A	T	0.542	-95786.17	28876.83	0.002274045	0.0011072	0.004749921
3	3_186440147_A_C	186440147	0	36	C	A	0.014	321853.0	80387.58	0.0003465485	0.0001315578	0.001525498
3	3_186947281_C_T	186947281	0	36	T	C	0.014	321853.0	80387.58	0.0003465485	0.0001315578	0.001525498
3	3_187088923_G_A	187088923	0	36	A	G	0.028	208171.0	61320.19	0.001848308	0.0008757407	0.004149849
3	3_187388089_G_A	187388089	0	36	A	G	0.014	436664.2	61020.15	4.012093e-08	4.481637e-09	4.648295e-05
3	3_187446035_A_G	187446035	0	36	G	A	0.014	321853.0	80387.58	0.0003465485	0.0001315578	0.001525498
3	3_187446728_T_G	187446728	0	36	G	T	0.014	321853.0	80387.58	0.0003465485	0.0001315578	0.001525498
3	3_188478225_C_T	188478225	0	36	T	C	0.042	212555.7	52494.49	0.0003050339	0.0001138464	0.001422091
3	3_188478229_C_T	188478229	0	36	T	C	0.014	436664.2	61020.15	4.012093e-08	4.481637e-09	4.648295e-05
3	3_188956787_A_G	188956787	0	36	G	A	0.097	143309.9	33462.95	0.0001573216	5.374976e-05	0.001000517
3	3_188956914_C_G	188956914	0	36	G	C	0.181	87197.85	23193.24	0.0006845668	0.0002844801	0.002249803
3	3_190575590_A_G	190575590	0	36	G	A	0.014	321853.0	80387.58	0.0003465485	0.0001315578	0.001525498
3	3_190986318_C_T	190986318	0	36	T	C	0.014	321853.0	80387.58	0.0003465485	0.0001315578	0.001525498
[truncated: 8,001 more rows]
