# Supplementary material for: Genomic Markers Associated with Cytomegalovirus DNAemia in Kidney Transplant Recipients
Source: Viruses. 2023 Nov 8;15(11):2227. doi: 10.3390/v15112227 (PMC10674338; doi:10.3390/v15112227)
Supplement: Supplementary file 1 [file viruses-15-02227-s001.zip › S7_peak_viral_load.cohortB.assoc.txt]

chr	rs	ps	n_mis	n_obs	allele1	allele0	af	beta	se	p_wald	p_lrt	p_score
1	1_876499_A_G	876499	0	59	G	A	0.949	-4.381393	1.479106	0.004533881	0.002877764	0.005820998
1	1_879676_G_A	879676	0	59	A	G	0.941	-4.382454	1.370757	0.002321663	0.001383348	0.003400552
1	1_879687_T_C	879687	0	59	C	T	0.941	-4.382454	1.370757	0.002321663	0.001383348	0.003400552
1	1_880238_A_G	880238	0	59	G	A	0.949	-4.381393	1.479106	0.004533881	0.002877764	0.005820998
1	1_887560_A_C	887560	0	59	C	A	0.932	-2.438774	1.211669	0.04913959	0.03883522	0.04738742
1	1_887801_A_G	887801	0	59	G	A	0.949	-4.381393	1.479106	0.004533881	0.002877764	0.005820998
1	1_888639_T_C	888639	0	59	C	T	0.949	-4.381393	1.479106	0.004533881	0.002877764	0.005820998
1	1_888659_T_C	888659	0	59	C	T	0.949	-4.381393	1.479106	0.004533881	0.002877764	0.005820998
1	1_889158_G_C	889158	0	59	C	G	0.949	-4.381393	1.479106	0.004533881	0.002877764	0.005820998
1	1_889159_A_C	889159	0	59	C	A	0.949	-4.381393	1.479106	0.004533881	0.002877764	0.005820998
1	1_889238_G_A	889238	0	59	A	G	0.051	4.381393	1.479106	0.004533881	0.002877764	0.005820998
1	1_892569_C_T	892569	0	59	T	C	0.017	7.135831	2.484651	0.005817607	0.003780028	0.007150959
1	1_898323_T_C	898323	0	59	C	T	0.949	-3.02509	1.549649	0.05611805	0.04487729	0.05373028
1	1_898467_C_T	898467	0	59	T	C	0.051	4.381393	1.479106	0.004533881	0.002877764	0.005820998
1	1_900286_A_G	900286	0	59	G	A	0.949	-4.381393	1.479106	0.004533881	0.002877764	0.005820998
1	1_909309_T_C	909309	0	59	C	T	0.178	-2.230017	0.9993673	0.02982522	0.02253602	0.02979769
1	1_914839_C_T	914839	0	59	T	C	0.093	3.575111	1.161753	0.00327744	0.002017608	0.004473472
1	1_1026707_C_A	1026707	0	59	A	C	0.61	-1.495602	0.7078883	0.0392596	0.03040973	0.03840358
1	1_1026801_T_A	1026801	0	59	A	T	0.61	-1.463242	0.7095674	0.04401777	0.03444697	0.0427318
1	1_1115548_G_A	1115548	0	59	A	G	0.025	6.674418	2.067937	0.002124246	0.001255093	0.003171368
1	1_1223465_GC_G	1223465	0	59	G	GC	0.093	-2.475258	1.215026	0.046543	0.03660531	0.04502741
1	1_1226889_G_A	1226889	0	59	A	G	0.034	-4.002156	1.900706	0.03990348	0.03095367	0.03898958
1	1_1229173_G_GC	1229173	0	59	GC	G	0.017	-5.952283	2.628305	0.02756888	0.02068298	0.02773096
1	1_1229177_A_T	1229177	0	59	T	A	0.017	-5.952283	2.628305	0.02756888	0.02068298	0.02773096
1	1_1229182_C_T	1229182	0	59	T	C	0.017	-5.952283	2.628305	0.02756888	0.02068298	0.02773096
1	1_1229184_A_G	1229184	0	59	G	A	0.017	-5.952283	2.628305	0.02756888	0.02068298	0.02773096
1	1_1229185_G_A	1229185	0	59	A	G	0.017	-5.952283	2.628305	0.02756888	0.02068298	0.02773096
1	1_1235200_C_T	1235200	0	59	T	C	0.017	6.1317	2.562035	0.02020346	0.01473359	0.02094147
1	1_1247578_T_TGGG	1247578	0	59	TGGG	T	0.068	3.686281	1.332204	0.007730236	0.005158079	0.009075878
1	1_1254436_A_G	1254436	0	59	G	A	0.958	2.797238	1.435426	0.05653289	0.04523858	0.05410743
1	1_1268462_G_A	1268462	0	59	A	G	0.025	4.193436	2.142175	0.05545809	0.04430298	0.05313031
1	1_1268847_T_G	1268847	0	59	G	T	0.983	5.999928	2.628018	0.02638815	0.01971856	0.02664749
1	1_1269554_T_C	1269554	0	59	C	T	0.983	5.999928	2.628018	0.02638815	0.01971856	0.02664749
1	1_1276973_G_GACAC	1276973	0	59	GACAC	G	0.983	5.999928	2.628018	0.02638815	0.01971856	0.02664749
1	1_1290606_C_G	1290606	0	59	G	C	0.042	4.012673	1.645855	0.01808812	0.01305789	0.01897345
1	1_1296691_C_G	1296691	0	59	G	C	0.983	5.999928	2.628018	0.02638815	0.01971856	0.02664749
1	1_1355796_C_T	1355796	0	59	T	C	0.017	-5.999928	2.628018	0.02638815	0.01971856	0.02664749
1	1_1356020_A_AACCCCGCCCTGCCCC	1356020	0	59	AACCCCGCCCTGCCCC	A	0.017	-5.999928	2.628018	0.02638815	0.01971856	0.02664749
1	1_1361641_C_T	1361641	0	59	T	C	0.229	-2.230193	0.8218219	0.008910827	0.006025123	0.0102403
1	1_1374834_A_G	1374834	0	59	G	A	0.246	-2.214297	0.7850919	0.006694517	0.004407359	0.008040425
1	1_1375185_G_C	1375185	0	59	C	G	0.169	-1.880748	0.931073	0.04835864	0.03816345	0.04667765
1	1_1386016_A_G	1386016	0	59	G	A	0.186	-1.751206	0.8637209	0.04755715	0.037475	0.0459492
1	1_1387726_A_G	1387726	0	59	G	A	0.186	-1.751206	0.8637209	0.04755715	0.037475	0.0459492
1	1_1387764_G_A	1387764	0	59	A	G	0.186	-1.751206	0.8637209	0.04755715	0.037475	0.0459492
1	1_1389695_C_T	1389695	0	59	T	C	0.229	-1.952353	0.7798442	0.01535197	0.01091675	0.01640959
1	1_1390875_C_T	1390875	0	59	T	C	0.203	-1.906657	0.8383216	0.02694064	0.02016937	0.02715466
1	1_1391304_T_C	1391304	0	59	C	T	0.203	-1.906657	0.8383216	0.02694064	0.02016937	0.02715466
1	1_1391534_G_A	1391534	0	59	A	G	0.203	-1.906657	0.8383216	0.02694064	0.02016937	0.02715466
1	1_1391562_G_A	1391562	0	59	A	G	0.203	-1.729406	0.8078205	0.03681949	0.0283555	0.0361817
1	1_1391597_T_C	1391597	0	59	C	T	0.076	-2.475109	1.154733	0.0365988	0.02817028	0.03598064
1	1_1392451_C_T	1392451	0	59	T	C	0.203	-1.906657	0.8383216	0.02694064	0.02016937	0.02715466
1	1_1407372_T_C	1407372	0	59	C	T	0.263	-1.689941	0.8338958	0.04765781	0.03756141	0.04604069
1	1_1414146_G_A	1414146	0	59	A	G	0.017	-5.331133	2.67068	0.05096826	0.04041178	0.04904938
1	1_1417696_C_G	1417696	0	59	G	C	0.695	-1.572969	0.7506439	0.04083064	0.03173827	0.03983319
1	1_1421916_T_C	1421916	0	59	C	T	0.161	-2.121207	1.034149	0.04511575	0.03538414	0.04373002
1	1_1534710_G_C	1534710	0	59	C	G	0.051	4.166509	1.495542	0.007347718	0.004879668	0.008695144
1	1_1558792_T_C	1558792	0	59	C	T	0.932	-3.803458	1.399389	0.008811604	0.005951825	0.010143
1	1_1571640_G_T	1571640	0	59	T	G	0.398	-1.448559	0.7100063	0.04623297	0.03633976	0.0447456
1	1_1577180_C_T	1577180	0	59	T	C	0.331	-2.862062	0.8936742	0.002284963	0.001359425	0.003358184
1	1_1599974_A_C	1599974	0	59	C	A	0.339	-2.102415	1.004207	0.04100557	0.03188648	0.03999234
1	1_1635749_C_A	1635749	0	59	A	C	0.542	-1.619704	0.7119302	0.0268948	0.02013193	0.02711259
1	1_1636274_C_T	1636274	0	59	T	C	0.525	-1.658356	0.6804264	0.01812486	0.01308685	0.01900772
1	1_1636400_G_A	1636400	0	59	A	G	0.059	3.420308	1.444273	0.02148496	0.01575654	0.02212896
1	1_1663831_C_T	1663831	0	59	T	C	0.568	-1.481205	0.6389143	0.02424809	0.01798042	0.02467955
1	1_1663851_G_C	1663851	0	59	C	G	0.322	1.548152	0.7508551	0.04404823	0.03447294	0.0427595
1	1_1663861_G_A	1663861	0	59	A	G	0.322	1.548152	0.7508551	0.04404823	0.03447294	0.0427595
1	1_1666303_T_C	1666303	0	59	C	T	0.381	-2.373567	1.210921	0.05514861	0.04403387	0.05284898
1	1_1666342_A_G	1666342	0	59	G	A	0.508	-1.245058	0.5973067	0.04186315	0.03261384	0.04077244
1	1_1669734_G_T	1669734	0	59	T	G	0.559	-1.551035	0.6491473	0.02040042	0.01489044	0.0211242
1	1_1669748_A_G	1669748	0	59	G	A	0.322	1.548152	0.7508551	0.04404823	0.03447294	0.0427595
1	1_1696879_C_T	1696879	0	59	T	C	0.017	7.478508	2.49627	0.004126288	0.002595939	0.00538983
1	1_1960674_C_T	1960674	0	59	T	C	0.127	2.566848	1.0918	0.02240233	0.0164922	0.02297715
1	1_1961408_C_T	1961408	0	59	T	C	0.127	2.566848	1.0918	0.02240233	0.0164922	0.02297715
1	1_2235672_C_T	2235672	0	59	T	C	0.144	-2.100598	0.9544095	0.03203555	0.02436333	0.0318183
1	1_2323041_T_C	2323041	0	59	C	T	0.305	1.508532	0.6595142	0.02611993	0.01950001	0.02640115
1	1_2487766_T_C	2487766	0	59	C	T	0.5	1.633267	0.7360774	0.03071814	0.02327282	0.0306144
1	1_2490942_C_A	2490942	0	59	A	C	0.475	1.597137	0.7159583	0.02987162	0.02257426	0.02984015
1	1_2491205_C_T	2491205	0	59	T	C	0.5	1.633267	0.7360774	0.03071814	0.02327282	0.0306144
1	1_2494785_G_A	2494785	0	59	A	G	0.508	1.495908	0.7568815	0.05322553	0.04236457	0.05110095
1	1_3319601_ACCCTCCTCTGAGTCTTCCTCCCCTTCCCGTG_A	3319601	0	59	A	ACCCTCCTCTGAGTCTTCCTCCCCTTCCCGTG	0.305	-1.293366	0.6010313	0.03589319	0.02757876	0.03533768
1	1_3329209_C_T	3329209	0	59	T	C	0.017	5.412961	2.585154	0.0409816	0.03186616	0.03997053
1	1_3544187_C_T	3544187	0	59	T	C	0.017	-5.878076	2.567052	0.0259656	0.01937435	0.02625937
1	1_3607520_G_A	3607520	0	59	A	G	0.314	1.864744	0.844981	0.03159636	0.02399934	0.03141709
1	1_3686415_C_T	3686415	0	59	T	C	0.051	4.046282	1.340397	0.003869569	0.002419744	0.005115543
1	1_6154417_C_T	6154417	0	59	T	C	0.22	1.41003	0.7267005	0.0575701	0.04614289	0.05505047
1	1_6155332_T_C	6155332	0	59	C	T	0.678	1.76828	0.6444543	0.008225153	0.005520174	0.009565862
1	1_6158562_A_G	6158562	0	59	G	A	0.585	1.308096	0.6086199	0.0361111	0.02776133	0.03553626
1	1_6162054_T_C	6162054	0	59	C	T	0.644	1.546014	0.623829	0.01635955	0.01170152	0.01735649
1	1_6170659_A_T	6170659	0	59	T	A	0.034	3.74449	1.858355	0.04890028	0.03862926	0.04716992
1	1_6505671_G_A	6505671	0	59	A	G	0.034	3.783876	1.882304	0.04941219	0.03906991	0.04763517
1	1_6545390_A_T	6545390	0	59	T	A	0.076	2.50923	1.16924	0.03638174	0.02798822	0.03578288
1	1_6694513_G_T	6694513	0	59	T	G	0.314	-2.296893	0.8322608	0.007881361	0.005268427	0.0092258
1	1_6694514_A_T	6694514	0	59	T	A	0.314	-2.296893	0.8322608	0.007881361	0.005268427	0.0092258
1	1_6705874_G_C	6705874	0	59	C	G	0.322	-2.143812	0.8467664	0.01429164	0.01009592	0.01540907
1	1_7700674_C_T	7700674	0	59	T	C	0.042	4.241994	1.655725	0.01322999	0.009279577	0.01440254
1	1_7887262_G_A	7887262	0	59	A	G	0.017	5.0824	2.613999	0.05707625	0.04571214	0.05460144
1	1_8022832_C_A	8022832	0	59	A	C	0.017	5.0824	2.613999	0.05707625	0.04571214	0.05460144
1	1_8029494_T_G	8029494	0	59	G	T	0.119	-2.043231	1.03265	0.05296791	0.04214134	0.0508668
1	1_8029509_G_A	8029509	0	59	A	G	0.11	-2.652176	1.047031	0.01424515	0.01006005	0.01536509
1	1_8029510_G_A	8029510	0	59	A	G	0.119	-2.534298	0.9751958	0.01203731	0.008369566	0.01326519
1	1_8385485_GA_CA	8385485	0	59	CA	GA	0.034	4.071278	2.02755	0.04965924	0.03928272	0.0478597
1	1_8684402_C_T	8684402	0	59	T	C	0.025	3.219652	1.647062	0.05579346	0.04459475	0.05343519
1	1_9325001_C_T	9325001	0	59	T	C	0.034	3.934787	1.849563	0.03796887	0.02932168	0.03722854
1	1_9671966_C_G	9671966	0	59	G	C	0.017	5.18611	2.624383	0.05325862	0.04239325	0.05113103
1	1_9671975_A_T	9671975	0	59	T	A	0.025	4.694462	2.232834	0.04018983	0.03119582	0.03925015
1	1_9770690_CAG_CAGAG	9770690	0	59	CAGAG	CAG	0.254	-2.689218	0.9336674	0.005686612	0.003687034	0.007016903
1	1_10190575_G_C	10190575	0	59	C	G	0.042	-4.051211	1.689198	0.01995603	0.01453674	0.0207118
1	1_10239647_A_G	10239647	0	59	G	A	0.042	-4.051211	1.689198	0.01995603	0.01453674	0.0207118
1	1_10339129_G_A	10339129	0	59	A	G	0.034	-3.908616	1.865711	0.04087869	0.03177897	0.0398769
1	1_10342522_G_A	10342522	0	59	A	G	0.034	-3.908616	1.865711	0.04087869	0.03177897	0.0398769
1	1_10357206_AT_A	10357206	0	59	A	AT	0.364	3.324578	1.007757	0.001721753	0.0009971804	0.002693064
1	1_10397567_A_G	10397567	0	59	G	A	0.034	-3.908616	1.865711	0.04087869	0.03177897	0.0398769
1	1_10399811_TA_T	10399811	0	59	T	TA	0.034	-3.908616	1.865711	0.04087869	0.03177897	0.0398769
1	1_10423319_T_C	10423319	0	59	C	T	0.034	-3.908616	1.865711	0.04087869	0.03177897	0.0398769
1	1_10431329_C_T	10431329	0	59	T	C	0.034	-3.908616	1.865711	0.04087869	0.03177897	0.0398769
1	1_10459136_C_T	10459136	0	59	T	C	0.025	5.675732	2.105603	0.009349677	0.006350198	0.01066954
1	1_10473200_G_A	10473200	0	59	A	G	0.034	-3.908616	1.865711	0.04087869	0.03177897	0.0398769
1	1_10479791_G_A	10479791	0	59	A	G	0.034	-3.908616	1.865711	0.04087869	0.03177897	0.0398769
1	1_10713765_T_C	10713765	0	59	C	T	0.483	-1.554016	0.718616	0.03502615	0.0268533	0.03454733
1	1_11133956_A_G	11133956	0	59	G	A	0.076	2.600526	1.316362	0.05332681	0.04245236	0.05119301
1	1_11710561_T_G	11710561	0	59	G	T	0.195	-1.789325	0.8502983	0.04001838	0.03105082	0.03909413
1	1_11735262_C_T	11735262	0	59	T	C	0.136	2.373725	0.989148	0.01988431	0.01447972	0.0206452
1	1_11735841_C_A	11735841	0	59	A	C	0.136	2.373725	0.989148	0.01988431	0.01447972	0.0206452
1	1_11737051_G_C	11737051	0	59	C	G	0.424	1.849325	0.7153966	0.01247081	0.00869942	0.01367946
1	1_11740358_A_G	11740358	0	59	G	A	0.331	1.96735	0.7252406	0.008935222	0.006043156	0.01026421
1	1_11845169_T_G	11845169	0	59	G	T	0.585	-1.33328	0.6592428	0.04809548	0.03793729	0.04643847
1	1_11848139_G_A	11848139	0	59	A	G	0.212	1.596067	0.76989	0.04294779	0.03353564	0.04175888
1	1_11851003_G_C	11851003	0	59	C	G	0.314	1.606474	0.6587088	0.01805331	0.01303046	0.01894097
1	1_11852300_C_T	11852300	0	59	T	C	0.314	1.606474	0.6587088	0.01805331	0.01303046	0.01894097
1	1_11854476_T_G	11854476	0	59	G	T	0.322	1.601791	0.6364525	0.01484668	0.01052493	0.01593335
1	1_11854671_C_A	11854671	0	59	A	C	0.288	1.619816	0.6777341	0.02036521	0.01486239	0.02109153
1	1_11879685_C_T	11879685	0	59	T	C	0.449	1.465783	0.6286608	0.02348293	0.01736221	0.02397445
1	1_11897592_A_G	11897592	0	59	G	A	0.449	1.465783	0.6286608	0.02348293	0.01736221	0.02397445
1	1_12368705_GT_G	12368705	0	59	G	GT	0.186	-1.884367	0.9698266	0.05723786	0.04585306	0.05474838
1	1_12469957_A_T	12469957	0	59	T	A	0.034	5.905652	1.745987	0.001342918	0.000759583	0.002225334
1	1_12638689_T_C	12638689	0	59	C	T	0.025	-4.245974	2.150541	0.05346275	0.04257021	0.05131656
1	1_12639289_C_T	12639289	0	59	T	C	0.034	-3.768616	1.868641	0.04870369	0.03846014	0.04699125
1	1_12639309_G_C	12639309	0	59	C	G	0.025	-4.245974	2.150541	0.05346275	0.04257021	0.05131656
1	1_12640461_C_G	12640461	0	59	G	C	0.034	-3.768616	1.868641	0.04870369	0.03846014	0.04699125
1	1_12953195_C_T	12953195	0	59	T	C	0.034	3.670318	1.878406	0.05589433	0.04468253	0.05352689
1	1_13001418_C_A	13001418	0	59	A	C	0.398	-1.268779	0.6414827	0.05305407	0.04221599	0.05094511
1	1_14099529_TA_T	14099529	0	59	T	TA	0.042	3.732555	1.674437	0.02998629	0.02266878	0.02994506
1	1_14149601_C_T	14149601	0	59	T	C	0.822	-1.973241	0.9042154	0.03345927	0.02554628	0.03311811
1	1_14149622_T_C	14149622	0	59	C	T	0.822	-1.973241	0.9042154	0.03345927	0.02554628	0.03311811
1	1_15390178_C_T	15390178	0	59	T	C	0.22	-1.929966	0.8260238	0.02320853	0.01714094	0.02372138
1	1_15420616_G_C	15420616	0	59	C	G	0.136	-2.275062	1.074036	0.03877313	0.02999928	0.03796077
1	1_15707984_G_A	15707984	0	59	A	G	0.254	1.809141	0.7959465	0.02703262	0.0202445	0.02723905
1	1_15723843_G_A	15723843	0	59	A	G	0.466	-1.523383	0.7048762	0.03513192	0.02694171	0.03464375
1	1_15754484_T_C	15754484	0	59	C	T	0.856	-2.530406	0.9492345	0.01011213	0.006918273	0.01141129
1	1_15772057_G_T	15772057	0	59	T	G	0.322	-1.528169	0.703566	0.03426312	0.02621616	0.03385149
1	1_15813969_A_C	15813969	0	59	C	A	0.619	-1.352967	0.6506974	0.04235701	0.03303331	0.04122161
1	1_16011005_GGGC_GGGCGGC	16011005	0	59	GGGCGGC	GGGC	0.644	-1.510515	0.7224612	0.04126778	0.03210873	0.04023088
1	1_16096893_C_T	16096893	0	59	T	C	0.186	2.282991	0.8839659	0.01254698	0.008757487	0.01375214
1	1_16134129_C_T	16134129	0	59	T	C	0.025	9.103516	3.54391	0.01300277	0.009105609	0.01418643
1	1_16386065_T_A	16386065	0	59	A	T	0.119	-2.183886	1.11467	0.0552581	0.04412907	0.05294851
1	1_16464673_G_A	16464673	0	59	A	G	0.415	-1.692754	0.6928203	0.01785425	0.01287366	0.01875518
1	1_16474839_AC_A	16474839	0	59	A	AC	0.39	-1.923454	0.6906799	0.007369151	0.004895234	0.008716527
1	1_16475123_C_T	16475123	0	59	T	C	0.339	-2.190507	0.7050063	0.003010632	0.001838548	0.004179135
1	1_16475126_C_T	16475126	0	59	T	C	0.339	-2.190507	0.7050063	0.003010632	0.001838548	0.004179135
1	1_16534388_A_C	16534388	0	59	C	A	0.017	6.295492	2.541448	0.01640632	0.01173806	0.01740036
1	1_16543562_G_T	16543562	0	59	T	G	0.017	5.042413	2.599924	0.05767869	0.04623764	0.05514921
1	1_16558975_C_T	16558975	0	59	T	C	0.034	-3.733596	1.887187	0.05299533	0.04216509	0.05089172
1	1_16899599_C_T	16899599	0	59	T	C	0.042	3.951153	1.721489	0.0256334	0.01910407	0.02595409
1	1_17256313_G_A	17256313	0	59	A	G	0.347	2.01017	1.034252	0.05716305	0.04578783	0.05468037
1	1_17266536_G_C	17266536	0	59	C	G	0.28	2.11466	0.9434104	0.02912487	0.02195948	0.02915668
1	1_17273396_A_G	17273396	0	59	G	A	0.237	1.994617	0.9429587	0.03903586	0.03022089	0.03819993
1	1_17418883_A_G	17418883	0	59	G	A	0.949	2.663874	1.322326	0.04894485	0.03866761	0.04721043
1	1_17431300_C_T	17431300	0	59	T	C	0.017	5.314155	2.687449	0.05311064	0.042265	0.05099652
1	1_17431618_A_G	17431618	0	59	G	A	0.763	1.816617	0.6773553	0.009691087	0.006604066	0.01100228
1	1_17550121_G_A	17550121	0	59	A	G	0.178	1.890605	0.9113353	0.04280937	0.03341789	0.041633
1	1_17603436_A_G	17603436	0	59	G	A	0.034	-3.829018	1.884194	0.04706669	0.0370542	0.04550342
1	1_17714864_T_C	17714864	0	59	C	T	0.169	-2.697726	0.881313	0.003433065	0.002122688	0.00464362
1	1_17929972_G_T	17929972	0	59	T	G	0.169	-2.574338	0.9213838	0.007190371	0.004765528	0.008537979
1	1_17929980_C_G	17929980	0	59	G	C	0.5	1.941005	0.6788682	0.00602468	0.003927424	0.007362206
1	1_17929990_A_C	17929990	0	59	C	A	0.178	-2.466362	0.9284474	0.01036136	0.007104832	0.01165274
1	1_17948305_G_GGGCCACAGCAGGTACT	17948305	0	59	GGGCCACAGCAGGTACT	G	0.178	-2.73023	0.8784526	0.003002666	0.001833225	0.004170293
1	1_17965194_G_A	17965194	0	59	A	G	0.11	2.578949	0.9503972	0.008914822	0.006028076	0.01024421
1	1_17990886_CAGG_C	17990886	0	59	C	CAGG	0.017	7.537209	2.459149	0.003394899	0.002096876	0.004601991
1	1_18023877_G_A	18023877	0	59	A	G	0.127	1.955271	0.9870764	0.05270857	0.0419167	0.05063108
1	1_19186129_G_C	19186129	0	59	C	G	0.788	-1.841146	0.763149	0.01926675	0.01398951	0.0200713
1	1_20411332_C_T	20411332	0	59	T	C	0.364	-1.288928	0.6411797	0.04941143	0.03906926	0.04763448
1	1_20474907_T_C	20474907	0	59	C	T	0.076	3.493205	1.291115	0.009105066	0.006168828	0.0104305
1	1_20640906_C_T	20640906	0	59	T	C	0.017	-5.044569	2.574483	0.05523076	0.04410529	0.05292366
1	1_20676597_G_A	20676597	0	59	A	G	0.059	-3.167311	1.504551	0.03994532	0.03098904	0.03902765
1	1_20677490_C_A	20677490	0	59	A	C	0.059	-3.167311	1.504551	0.03994532	0.03098904	0.03902765
1	1_20960503_C_G	20960503	0	59	G	C	0.051	3.203864	1.626166	0.05395293	0.04299538	0.05176211
1	1_20971980_C_CA	20971980	0	59	CA	C	0.415	-2.108117	0.87535	0.01946997	0.01415067	0.02026025
1	1_21040088_C_T	21040088	0	59	T	C	0.034	4.640192	1.828507	0.0140776	0.009930877	0.01520654
1	1_21050270_C_T	21050270	0	59	T	C	0.025	4.385713	2.152068	0.04647048	0.03654318	0.04496149
1	1_21054639_C_A	21054639	0	59	A	C	0.025	-5.992775	2.063086	0.005316285	0.003425221	0.006636039
1	1_21071967_C_T	21071967	0	59	T	C	0.025	4.385713	2.152068	0.04647048	0.03654318	0.04496149
1	1_21181595_A_G	21181595	0	59	G	A	0.076	3.506058	1.254001	0.007153504	0.004738818	0.008501106
1	1_21267993_G_C	21267993	0	59	C	G	0.034	4.036089	1.877016	0.03602913	0.02769264	0.03546156
1	1_21880515_T_C	21880515	0	59	C	T	0.025	-4.5875	2.12786	0.03556292	0.02730223	0.03503666
1	1_21880519_A_C	21880519	0	59	C	A	0.025	-4.5875	2.12786	0.03556292	0.02730223	0.03503666
1	1_21935358_C_T	21935358	0	59	T	C	0.017	-5.841837	2.567728	0.02689414	0.02013139	0.02711198
1	1_22013771_G_A	22013771	0	59	A	G	0.449	1.571212	0.6383759	0.01707121	0.01225845	0.01802327
1	1_22033152_G_A	22033152	0	59	A	G	0.11	-2.008617	1.027967	0.05589211	0.0446806	0.05352487
1	1_22063149_G_A	22063149	0	59	A	G	0.619	1.944635	0.6187957	0.002718452	0.001644164	0.003852538
1	1_22141030_C_T	22141030	0	59	T	C	0.059	-3.133675	1.543824	0.04731475	0.03726698	0.04572888
1	1_22190541_C_G	22190541	0	59	G	C	0.017	-5.325851	2.653134	0.04972474	0.03933916	0.04791923
1	1_22207381_C_T	22207381	0	59	T	C	0.017	-5.325851	2.653134	0.04972474	0.03933916	0.04791923
1	1_22307478_G_A	22307478	0	59	A	G	0.017	5.342311	2.651255	0.04889332	0.03862328	0.0471636
1	1_22310847_G_C	22310847	0	59	C	G	0.059	3.009061	1.444715	0.04201931	0.03274643	0.04091447
1	1_22928305_G_T	22928305	0	59	T	G	0.017	-5.331133	2.67068	0.05096826	0.04041178	0.04904938
1	1_22973699_C_G	22973699	0	59	G	C	0.051	-3.499044	1.59952	0.03305034	0.02520604	0.03274489
1	1_23520797_T_C	23520797	0	59	C	T	0.068	-2.90539	1.372597	0.03890825	0.03011324	0.03808378
1	1_24684728_G_A	24684728	0	59	A	G	0.093	-2.788492	1.18441	0.02222296	0.01634815	0.02281143
1	1_24690676_G_A	24690676	0	59	A	G	0.068	3.15334	1.362104	0.02443963	0.01813545	0.02485592
1	1_24979358_C_G	24979358	0	59	G	C	0.034	-4.701288	1.831667	0.01307318	0.009159487	0.01425342
1	1_25255850_C_G	25255850	0	59	G	C	0.042	3.886426	1.664936	0.02333097	0.01723965	0.02383432
1	1_26138136_C_A	26138136	0	59	A	C	0.72	1.429941	0.7197217	0.05202855	0.04132815	0.05001303
1	1_26138262_T_C	26138262	0	59	C	T	0.729	1.429191	0.7192587	0.05200158	0.04130481	0.04998851
1	1_26139137_C_T	26139137	0	59	T	C	0.712	1.430665	0.7201791	0.0520578	0.04135345	0.05003961
1	1_26140573_C_A	26140573	0	59	A	C	0.712	1.430665	0.7201791	0.0520578	0.04135345	0.05003961
1	1_26152758_A_G	26152758	0	59	G	A	0.746	1.552949	0.7357123	0.03943474	0.03055761	0.03856299
1	1_26158337_C_T	26158337	0	59	T	C	0.746	1.552949	0.7357123	0.03943474	0.03055761	0.03856299
1	1_26227971_A_G	26227971	0	59	G	A	0.025	4.790593	2.099539	0.02647179	0.01978675	0.02672429
1	1_26607437_GAC_G	26607437	0	59	G	GAC	0.017	6.325709	2.549831	0.01625437	0.01161939	0.0172578
1	1_26607439_C_CGGGGG	26607439	0	59	CGGGGG	C	0.017	6.325709	2.549831	0.01625437	0.01161939	0.0172578
1	1_26650661_A_G	26650661	0	59	G	A	0.076	-2.845884	1.293342	0.03207517	0.02439619	0.03185449
1	1_26663063_C_T	26663063	0	59	T	C	0.051	2.861839	1.319113	0.03446333	0.02638322	0.0340341
1	1_26671144_T_C	26671144	0	59	C	T	0.051	2.861839	1.319113	0.03446333	0.02638322	0.0340341
1	1_26801229_C_A	26801229	0	59	A	C	0.28	1.795925	0.8302759	0.03498299	0.02681723	0.03450798
1	1_26869610_G_A	26869610	0	59	A	G	0.72	1.704863	0.7903788	0.03547295	0.02722695	0.03495465
1	1_26883511_A_C	26883511	0	59	C	A	0.229	-1.638175	0.843615	0.05737948	0.04597659	0.05487715
1	1_27210667_C_T	27210667	0	59	T	C	0.017	-5.874691	2.61302	0.02866509	0.02158164	0.02873563
1	1_27721073_C_T	27721073	0	59	T	C	0.025	-4.691505	2.130055	0.03191701	0.02426504	0.03171002
1	1_27874243_T_G	27874243	0	59	G	T	0.017	-5.874691	2.61302	0.02866509	0.02158164	0.02873563
1	1_29345009_C_CTT	29345009	0	59	CTT	C	0.864	-1.827093	0.9200192	0.0521276	0.04141383	0.05010305
1	1_29475341_C_T	29475341	0	59	T	C	0.746	2.321351	0.862211	0.009429281	0.006409316	0.01074721
1	1_29475394_C_G	29475394	0	59	G	C	0.746	2.321351	0.862211	0.009429281	0.006409316	0.01074721
1	1_29486011_C_T	29486011	0	59	T	C	0.025	4.330029	2.113073	0.04531791	0.03555691	0.0439138
1	1_29547495_C_T	29547495	0	59	T	C	0.025	4.330029	2.113073	0.04531791	0.03555691	0.0439138
1	1_29641846_C_T	29641846	0	59	T	C	0.161	-2.379125	0.9873299	0.01940561	0.01409962	0.02020042
1	1_29641865_G_A	29641865	0	59	A	G	0.161	-2.379125	0.9873299	0.01940561	0.01409962	0.02020042
1	1_29642681_G_A	29642681	0	59	A	G	0.161	-2.379125	0.9873299	0.01940561	0.01409962	0.02020042
1	1_29644328_C_T	29644328	0	59	T	C	0.161	-2.379125	0.9873299	0.01940561	0.01409962	0.02020042
1	1_31186387_C_T	31186387	0	59	T	C	0.119	2.36078	1.113407	0.03858915	0.02984416	0.03779328
1	1_31196255_G_A	31196255	0	59	A	G	0.364	-1.288602	0.6212464	0.04284049	0.03344436	0.0416613
1	1_31741992_A_T	31741992	0	59	T	A	0.017	-5.874691	2.61302	0.02866509	0.02158164	0.02873563
1	1_31744168_G_A	31744168	0	59	A	G	0.661	1.616867	0.7059464	0.0259322	0.01934715	0.02622868
1	1_31883295_T_C	31883295	0	59	C	T	0.415	-1.335364	0.6455335	0.04338365	0.03390664	0.04215522
1	1_31886101_G_C	31886101	0	59	C	G	0.102	-2.278455	1.053826	0.03506124	0.02688263	0.03457932
1	1_31886833_T_C	31886833	0	59	C	T	0.407	-1.586151	0.6266013	0.01430645	0.01010735	0.01542308
1	1_31896608_C_T	31896608	0	59	T	C	0.025	-5.072208	2.080959	0.01811556	0.01307952	0.01899904
1	1_31897643_G_A	31897643	0	59	A	G	0.102	-2.278455	1.053826	0.03506124	0.02688263	0.03457932
1	1_31898132_T_C	31898132	0	59	C	T	0.576	1.397382	0.6479378	0.03550234	0.02725154	0.03498144
1	1_31898162_C_T	31898162	0	59	T	C	0.576	1.397382	0.6479378	0.03550234	0.02725154	0.03498144
1	1_31898234_T_C	31898234	0	59	C	T	0.585	1.387821	0.6742396	0.04439555	0.03476919	0.04307527
1	1_31898279_A_C	31898279	0	59	C	A	0.576	1.397382	0.6479378	0.03550234	0.02725154	0.03498144
1	1_32128283_C_G	32128283	0	59	G	C	0.441	1.515177	0.7263206	0.04170785	0.03248203	0.04063118
1	1_32134502_A_C	32134502	0	59	C	A	0.025	-4.558425	2.148734	0.03849016	0.02976073	0.03770316
1	1_32150411_C_G	32150411	0	59	G	C	0.042	-3.751056	1.852197	0.04780287	0.03768596	0.04617253
1	1_32832292_A_G	32832292	0	59	G	A	0.042	4.999578	1.808441	0.00778167	0.005195613	0.009126934
1	1_33135035_A_AT	33135035	0	59	AT	A	0.017	-5.730764	2.596084	0.03155072	0.02396154	0.03137539
1	1_33476403_G_A	33476403	0	59	A	G	0.017	-5.841837	2.567728	0.02689414	0.02013139	0.02711198
1	1_33778063_G_A	33778063	0	59	A	G	0.059	-3.160134	1.436679	0.03213508	0.02444589	0.03190922
1	1_33987025_A_C	33987025	0	59	C	A	0.085	-2.609516	1.254731	0.04231081	0.03299405	0.04117959
1	1_34383662_T_C	34383662	0	59	C	T	0.153	2.318875	1.022037	0.02729564	0.02045946	0.02748036
1	1_35250720_C_T	35250720	0	59	T	C	0.042	3.90906	1.368187	0.0060588	0.003951757	0.007396938
1	1_35453651_A_C	35453651	0	59	C	A	0.017	5.855472	2.567479	0.02654174	0.0198438	0.02678851
1	1_35486072_TA_TAA	35486072	0	59	TAA	TA	0.076	3.961581	1.267154	0.002848587	0.001730512	0.003998594
1	1_36927733_G_A	36927733	0	59	A	G	0.932	-4.086852	1.303881	0.002783708	0.001687416	0.003925901
1	1_37324683_A_C	37324683	0	59	C	A	0.28	-2.127364	0.7995534	0.01024664	0.007018907	0.01154166
1	1_37325477_A_C	37325477	0	59	C	A	0.297	-1.790759	0.74143	0.01913809	0.01388756	0.01995162
1	1_38164670_C_T	38164670	0	59	T	C	0.025	-3.331671	1.634223	0.04638962	0.03647391	0.04488799
1	1_38332080_A_T	38332080	0	59	T	A	0.051	-3.327571	1.583453	0.04028137	0.03127326	0.03933344
1	1_39305403_C_T	39305403	0	59	T	C	0.254	1.660354	0.8245673	0.04904554	0.03875426	0.04730194
1	1_39330399_G_A	39330399	0	59	A	G	0.254	1.660354	0.8245673	0.04904554	0.03875426	0.04730194
1	1_39340862_A_G	39340862	0	59	G	A	0.254	1.660354	0.8245673	0.04904554	0.03875426	0.04730194
1	1_39361569_G_A	39361569	0	59	A	G	0.254	1.660354	0.8245673	0.04904554	0.03875426	0.04730194
1	1_39494687_G_A	39494687	0	59	A	G	0.839	2.347545	0.8886379	0.01076703	0.007409362	0.01204477
1	1_39800558_C_A	39800558	0	59	A	C	0.025	-4.77957	2.093443	0.02638484	0.01971586	0.02664445
1	1_39976997_C_T	39976997	0	59	T	C	0.017	6.295492	2.541448	0.01640632	0.01173806	0.01740036
1	1_39988145_T_C	39988145	0	59	C	T	0.093	-2.610433	1.204356	0.03462521	0.02651835	0.03418173
1	1_39991474_A_C	39991474	0	59	C	A	0.212	1.964674	0.8316753	0.02179525	0.01600506	0.02241602
1	1_39991475_G_A	39991475	0	59	A	G	0.212	1.964674	0.8316753	0.02179525	0.01600506	0.02241602
1	1_40027464_G_A	40027464	0	59	A	G	0.102	-2.530871	1.148369	0.03181606	0.02418137	0.03161781
1	1_40149870_C_G	40149870	0	59	G	C	0.831	1.68178	0.8679086	0.05789178	0.04642363	0.05534297
1	1_40229393_G_A	40229393	0	59	A	G	0.186	-1.849594	0.9028117	0.04536435	0.03559661	0.04395601
1	1_40236981_G_A	40236981	0	59	A	G	0.068	-3.277136	1.34284	0.01798031	0.01297294	0.01887285
1	1_40240691_C_T	40240691	0	59	T	C	0.068	-3.277136	1.34284	0.01798031	0.01297294	0.01887285
1	1_40253810_GC_G	40253810	0	59	G	GC	0.051	-3.864447	1.527402	0.01435298	0.01014326	0.01546707
1	1_40253812_G_A	40253812	0	59	A	G	0.051	-3.864447	1.527402	0.01435298	0.01014326	0.01546707
1	1_40363054_G_C	40363054	0	59	C	G	0.873	-2.051649	0.9104249	0.02830984	0.02129007	0.02841017
1	1_40434207_T_C	40434207	0	59	C	T	0.034	-4.147421	1.836933	0.02802344	0.02105524	0.0281477
1	1_40705726_A_T	40705726	0	59	T	A	0.229	1.50352	0.7728031	0.05692323	0.04557874	0.05446232
1	1_41282919_C_T	41282919	0	59	T	C	0.153	-2.308271	0.7890291	0.005020921	0.003217609	0.006330121
1	1_41282921_C_T	41282921	0	59	T	C	0.153	-2.308271	0.7890291	0.005020921	0.003217609	0.006330121
1	1_41284119_C_G	41284119	0	59	G	C	0.153	-2.308271	0.7890291	0.005020921	0.003217609	0.006330121
1	1_41285553_T_C	41285553	0	59	C	T	0.059	-3.762951	1.196864	0.002707536	0.001636938	0.003840241
1	1_41288105_G_C	41288105	0	59	C	G	0.119	1.983522	0.9608093	0.04379426	0.03425644	0.04252857
1	1_41466803_G_A	41466803	0	59	A	G	0.483	1.370726	0.6971821	0.05443752	0.04341603	0.05220259
1	1_41494222_G_T	41494222	0	59	T	G	0.551	1.442768	0.6993517	0.04393412	0.03437565	0.04265574
1	1_41950312_T_C	41950312	0	59	C	T	0.941	2.799614	1.3192	0.03842351	0.02970456	0.03764248
1	1_43263489_T_C	43263489	0	59	C	T	0.034	3.838655	1.847692	0.04252131	0.03317294	0.04137103
1	1_43282743_G_C	43282743	0	59	C	G	0.017	-5.845378	2.637383	0.03090053	0.02342355	0.03078114
1	1_43282744_A_C	43282744	0	59	C	A	0.017	-5.845378	2.637383	0.03090053	0.02342355	0.03078114
1	1_43282749_G_C	43282749	0	59	C	G	0.017	-5.845378	2.637383	0.03090053	0.02342355	0.03078114
1	1_43777852_C_T	43777852	0	59	T	C	0.907	2.781093	1.113053	0.01554295	0.01106515	0.01658935
1	1_43825583_T_TTGAG	43825583	0	59	TTGAG	T	0.017	-6.290435	2.525101	0.01583771	0.01129452	0.01686652
1	1_43855490_C_T	43855490	0	59	T	C	0.042	3.906677	1.65012	0.02152041	0.01578491	0.02216177
1	1_44078384_T_C	44078384	0	59	C	T	0.678	1.529115	0.740087	0.0436273	0.03411417	0.04237677
1	1_44079411_T_C	44079411	0	59	C	T	0.686	1.596684	0.7662956	0.04194018	0.03267923	0.04084249
1	1_44083110_C_T	44083110	0	59	T	C	0.763	1.780213	0.8307161	0.03663758	0.02820282	0.03601597
1	1_44083507_T_C	44083507	0	59	C	T	0.763	1.780213	0.8307161	0.03663758	0.02820282	0.03601597
1	1_44083519_G_A	44083519	0	59	A	G	0.763	1.780213	0.8307161	0.03663758	0.02820282	0.03601597
1	1_44084739_C_T	44084739	0	59	T	C	0.763	1.780213	0.8307161	0.03663758	0.02820282	0.03601597
1	1_44086831_C_T	44086831	0	59	T	C	0.712	1.853692	0.7591888	0.0179257	0.01292993	0.01882188
1	1_44451114_GA_G	44451114	0	59	G	GA	0.305	-2.019754	0.9739896	0.04289161	0.03348785	0.04170779
1	1_44451115_A_AGG	44451115	0	59	AGG	A	0.195	1.864672	0.8722438	0.03707742	0.02857209	0.03641666
1	1_45292173_G_A	45292173	0	59	A	G	0.017	6.325709	2.549831	0.01625437	0.01161939	0.0172578
1	1_45340342_A_C	45340342	0	59	C	A	0.025	4.457763	2.143391	0.04230793	0.03299159	0.04117697
1	1_46083706_C_G	46083706	0	59	G	C	0.229	-1.830469	0.9436395	0.057635	0.04619952	0.05510949
1	1_46086329_C_T	46086329	0	59	T	C	0.229	-1.965732	0.9695073	0.04755247	0.03747098	0.04594494
1	1_46269713_C_CG	46269713	0	59	CG	C	0.025	4.20359	2.115988	0.0520527	0.04134904	0.05003498
1	1_46495434_G_A	46495434	0	59	A	G	0.492	-1.470147	0.6830425	0.03585683	0.0275483	0.03530454
1	1_46597496_CT_C	46597496	0	59	C	CT	0.119	-2.478577	1.083644	0.02612476	0.01950394	0.02640558
1	1_46743923_G_A	46743923	0	59	A	G	0.017	-5.268731	2.661998	0.05289715	0.04208004	0.05080248
1	1_47685569_G_A	47685569	0	59	A	G	0.042	3.367085	1.677351	0.04972456	0.039339	0.04791907
1	1_48821318_C_CA	48821318	0	59	CA	C	0.144	2.120506	0.9614509	0.03169403	0.02408025	0.03150632
1	1_49283803_G_A	49283803	0	59	A	G	0.017	-5.32579	2.734	0.05662269	0.04531681	0.05418907
1	1_50572096_C_A	50572096	0	59	A	C	0.229	1.569878	0.8070826	0.05697431	0.04562327	0.05450876
1	1_50884781_G_A	50884781	0	59	A	G	0.017	5.853011	2.704316	0.03487996	0.02673113	0.03441403
1	1_51032698_AT_A	51032698	0	59	A	AT	0.025	5.297183	2.128831	0.01595195	0.01138352	0.01697386
1	1_52399021_A_G	52399021	0	59	G	A	0.059	-2.499632	1.266834	0.05360788	0.04269605	0.05144847
1	1_54284760_GA_G	54284760	0	59	G	GA	0.017	-5.730764	2.596084	0.03155072	0.02396154	0.03137539
1	1_54476147_G_A	54476147	0	59	A	G	0.076	3.664006	1.124902	0.00194768	0.001141327	0.002963537
1	1_54502266_G_GTC	54502266	0	59	GTC	G	0.034	3.604339	1.48943	0.01891851	0.0137137	0.01974728
1	1_54502268_A_AAGGGTT	54502268	0	59	AAGGGTT	A	0.034	3.604339	1.48943	0.01891851	0.0137137	0.01974728
1	1_54507506_C_A	54507506	0	59	A	C	0.068	2.773182	1.367251	0.04747524	0.03740469	0.04587475
1	1_55014013_C_T	55014013	0	59	T	C	0.025	4.771137	2.186201	0.03345006	0.02553861	0.0331097
1	1_55085499_T_C	55085499	0	59	C	T	0.5	1.40062	0.7214998	0.05745265	0.04604041	0.05494368
1	1_55182300_T_A	55182300	0	59	A	T	0.576	1.452655	0.6522308	0.03012273	0.0227813	0.03006988
1	1_55247097_G_A	55247097	0	59	A	G	0.229	-1.690639	0.8443238	0.05027867	0.03981667	0.04842265
1	1_62253483_G_A	62253483	0	59	A	G	0.11	2.276503	1.020694	0.02990112	0.02259857	0.02986714
1	1_62380298_G_A	62380298	0	59	A	G	0.72	1.89706	0.7952854	0.02059958	0.01504919	0.02130888
1	1_62456048_G_A	62456048	0	59	A	G	0.305	1.650493	0.7705262	0.03671786	0.02827019	0.03608911
1	1_62703977_G_A	62703977	0	59	A	G	0.017	5.776353	2.571729	0.02881062	0.02170118	0.02886892
1	1_63920515_C_G	63920515	0	59	G	C	0.178	1.74191	0.8640196	0.04878076	0.03852644	0.0470613
1	1_64097432_C_T	64097432	0	59	T	C	0.254	-1.641456	0.7497666	0.03291758	0.02509567	0.03262371
1	1_65016349_A_T	65016349	0	59	T	A	0.932	-3.389621	1.225523	0.007755075	0.005176202	0.009100538
1	1_65614034_T_C	65614034	0	59	C	T	0.068	-3.251488	1.471256	0.03136346	0.02380649	0.03120427
1	1_65614260_C_T	65614260	0	59	T	C	0.068	-3.251488	1.471256	0.03136346	0.02380649	0.03120427
1	1_65684425_C_T	65684425	0	59	T	C	0.288	-1.567163	0.6951007	0.02823768	0.02123089	0.02834405
1	1_65867519_G_A	65867519	0	59	A	G	0.051	-3.096116	1.555234	0.05157662	0.04093737	0.04960229
1	1_66713196_C_G	66713196	0	59	G	C	0.025	4.404166	2.14403	0.04481478	0.03512705	0.04345641
1	1_66732445_ATTC_A	66732445	0	59	A	ATTC	0.025	4.404166	2.14403	0.04481478	0.03512705	0.04345641
1	1_67288045_C_T	67288045	0	59	T	C	0.5	1.413042	0.7091844	0.05138252	0.04076962	0.04942588
1	1_67292473_A_AT	67292473	0	59	AT	A	0.5	-1.413042	0.7091844	0.05138252	0.04076962	0.04942588
1	1_67292478_T_A	67292478	0	59	A	T	0.5	-1.413042	0.7091844	0.05138252	0.04076962	0.04942588
1	1_67519435_C_A	67519435	0	59	A	C	0.093	2.229662	1.128386	0.05327613	0.04240842	0.05114694
1	1_67561056_C_T	67561056	0	59	T	C	0.085	2.232984	1.114206	0.0500856	0.03965019	0.04824719
1	1_67591611_GAAA_G	67591611	0	59	G	GAAA	0.059	-2.984208	1.455533	0.04520765	0.03546267	0.04381357
1	1_67685443_G_A	67685443	0	59	A	G	0.424	1.680465	0.7950464	0.03917892	0.03034162	0.03833015
1	1_68512441_A_G	68512441	0	59	G	A	0.042	-4.183418	1.893742	0.03143205	0.02386327	0.03126695
1	1_68512899_C_A	68512899	0	59	A	C	0.034	-4.187204	1.892669	0.03119363	0.02366595	0.03104906
1	1_70225832_G_A	70225832	0	59	A	G	0.22	1.594553	0.7940596	0.04964563	0.03927099	0.04784733
1	1_70300399_AT_A	70300399	0	59	A	AT	0.025	6.175714	2.041109	0.003794522	0.002368439	0.005034926
1	1_70446182_G_A	70446182	0	59	A	G	0.051	4.183637	1.681849	0.01598345	0.01140806	0.01700345
1	1_70460238_C_T	70460238	0	59	T	C	0.051	4.183637	1.681849	0.01598345	0.01140806	0.01700345
1	1_70486660_A_G	70486660	0	59	G	A	0.051	4.183637	1.681849	0.01598345	0.01140806	0.01700345
1	1_70904523_T_TTGTG	70904523	0	59	TTGTG	T	0.415	-1.789595	0.863047	0.04290258	0.03349718	0.04171777
1	1_71419499_C_T	71419499	0	59	T	C	0.831	-2.004569	0.9125721	0.03236054	0.02463296	0.03211512
1	1_72242039_G_A	72242039	0	59	A	G	0.839	1.908216	0.9404869	0.04740393	0.0373435	0.04580993
1	1_74610233_TAAA_TAA	74610233	0	59	TAA	TAAA	0.195	1.76362	0.9076835	0.05723827	0.04585342	0.05474875
1	1_74716515_CT_C	74716515	0	59	C	CT	0.127	-2.412693	0.968251	0.01581206	0.01127454	0.01684241
1	1_75006027_A_G	75006027	0	59	G	A	0.542	-1.389239	0.6901716	0.04912337	0.03882125	0.04737268
1	1_76252011_G_A	76252011	0	59	A	G	0.542	1.508771	0.7295178	0.04342712	0.03394366	0.04219474
1	1_76255613_A_G	76255613	0	59	G	A	0.195	2.067218	0.8594249	0.01961273	0.01426397	0.02039293
1	1_76269372_T_C	76269372	0	59	C	T	0.5	1.455851	0.7071301	0.0443491	0.03472956	0.04303304
1	1_76269460_G_A	76269460	0	59	A	G	0.195	2.067218	0.8594249	0.01961273	0.01426397	0.02039293
1	1_76349534_C_G	76349534	0	59	G	C	0.186	1.896094	0.8584448	0.03145565	0.02388281	0.03128851
1	1_78001764_CT_C	78001764	0	59	C	CT	0.229	-2.582388	0.9386538	0.008066016	0.00540352	0.009408619
1	1_78105067_CA_C	78105067	0	59	C	CA	0.127	-2.64686	1.069621	0.01651161	0.01182034	0.01749909
1	1_78179032_AT_A	78179032	0	59	A	AT	0.347	1.328714	0.6767264	0.05475283	0.04368991	0.05248921
1	1_78183491_G_A	78183491	0	59	A	G	0.017	6.542166	2.550682	0.01313367	0.009205794	0.01431095
1	1_78184325_A_G	78184325	0	59	G	A	0.254	-1.599275	0.7890478	0.04762814	0.03753594	0.04601372
1	1_78401682_G_C	78401682	0	59	C	G	0.051	3.116617	1.543215	0.04840342	0.03820195	0.04671835
1	1_84372060_G_A	84372060	0	59	A	G	0.017	8.024695	3.59936	0.02996244	0.02264912	0.02992324
1	1_84944940_G_A	84944940	0	59	A	G	0.025	9.103516	3.54391	0.01300277	0.009105609	0.01418643
1	1_84956161_CT_CTT	84956161	0	59	CTT	CT	0.161	2.480328	1.060805	0.02311296	0.01706393	0.02363321
1	1_85279902_T_C	85279902	0	59	C	T	0.017	5.644819	2.551712	0.03120517	0.0236755	0.0310596
1	1_85594466_G_A	85594466	0	59	A	G	0.093	2.427844	1.224589	0.05251187	0.04174639	0.0504523
1	1_87538744_G_A	87538744	0	59	A	G	0.017	-5.952283	2.628305	0.02756888	0.02068298	0.02773096
1	1_87633929_A_G	87633929	0	59	G	A	0.093	2.520987	1.270631	0.05234366	0.0416008	0.05029942
1	1_89525966_T_C	89525966	0	59	C	T	0.017	5.644819	2.551712	0.03120517	0.0236755	0.0310596
1	1_90475877_G_A	90475877	0	59	A	G	0.017	-5.344454	2.563081	0.04179574	0.03255662	0.04071112
1	1_90486412_T_G	90486412	0	59	G	T	0.576	1.412677	0.6607541	0.03706135	0.0285586	0.03640202
1	1_90493026_G_A	90493026	0	59	A	G	0.576	1.412677	0.6607541	0.03706135	0.0285586	0.03640202
1	1_92163646_G_A	92163646	0	59	A	G	0.025	4.274307	2.149356	0.05181799	0.04114604	0.04982166
1	1_93646418_C_T	93646418	0	59	T	C	0.322	-1.392323	0.7090134	0.0547166	0.04365843	0.05245627
1	1_94487404_C_T	94487404	0	59	T	C	0.025	-4.141333	2.119496	0.05589798	0.04468571	0.05353021
1	1_94528359_C_T	94528359	0	59	T	C	0.017	6.135926	2.555267	0.01981012	0.01442075	0.0205763
1	1_94544276_G_A	94544276	0	59	A	G	0.534	1.459144	0.6913734	0.03946262	0.03058116	0.03858837
1	1_94544326_GT_G	94544326	0	59	G	GT	0.534	1.459144	0.6913734	0.03946262	0.03058116	0.03858837
1	1_94930345_G_A	94930345	0	59	A	G	0.475	1.583073	0.7638313	0.04300266	0.03358233	0.04180877
1	1_95332864_C_T	95332864	0	59	T	C	0.331	2.024232	0.7644859	0.01059697	0.007281569	0.01188057
1	1_95360319_G_A	95360319	0	59	A	G	0.017	5.963674	2.562693	0.02373885	0.01756879	0.02421038
1	1_95363663_A_C	95363663	0	59	C	A	0.017	-5.902772	2.628429	0.02883484	0.02172108	0.0288911
1	1_95392360_C_T	95392360	0	59	T	C	0.025	4.362688	2.152784	0.04766078	0.03756395	0.04604338
1	1_95530591_A_T	95530591	0	59	T	A	0.085	3.192427	1.262063	0.01437294	0.01015867	0.01548594
1	1_95712050_TGAGACTCA_T	95712050	0	59	T	TGAGACTCA	0.059	3.111274	1.451496	0.03659485	0.02816697	0.03597704
1	1_100818464_T_C	100818464	0	59	C	T	0.966	-5.326117	1.783361	0.004235417	0.002671152	0.005505768
1	1_100819273_T_C	100819273	0	59	C	T	0.119	2.129325	0.9611706	0.03097381	0.02348414	0.03084814
1	1_100970346_T_C	100970346	0	59	C	T	0.517	-1.747206	0.6942978	0.01485572	0.01053193	0.01594188
1	1_101194965_G_GT	101194965	0	59	GT	G	0.568	-1.842872	0.8875536	0.0426355	0.03327003	0.04147489
1	1_101203827_G_A	101203827	0	59	A	G	0.975	-5.232554	2.65263	0.05367151	0.04275124	0.05150632
1	1_103468855_TAA_TA	103468855	0	59	TA	TAA	0.203	-2.185035	0.9796004	0.0298879	0.02258768	0.02985505
1	1_107600869_G_A	107600869	0	59	A	G	0.076	-3.34633	1.280901	0.01161754	0.008051187	0.01286301
1	1_107961196_G_A	107961196	0	59	A	G	0.076	-2.583006	1.184678	0.03360915	0.02567108	0.03325488
1	1_109260357_G_A	109260357	0	59	A	G	0.593	1.316318	0.6568866	0.05011098	0.03967207	0.04827025
1	1_109265029_G_T	109265029	0	59	T	G	0.568	1.598789	0.6386022	0.01534964	0.01091495	0.0164074
1	1_109301059_TAGTC_T	109301059	0	59	T	TAGTC	0.042	2.923028	1.39513	0.04086099	0.03176398	0.0398608
1	1_109482304_G_A	109482304	0	59	A	G	0.051	-3.518906	1.310078	0.009587042	0.006526611	0.01090098
1	1_109484154_G_A	109484154	0	59	A	G	0.017	5.566413	2.596349	0.03655753	0.02813566	0.03594304
1	1_109727653_CT_C	109727653	0	59	C	CT	0.119	-2.103513	1.078999	0.05643638	0.0451545	0.05401969
1	1_109734157_T_C	109734157	0	59	C	T	0.78	1.818311	0.7960093	0.02631128	0.01965591	0.0265769
1	1_109734541_C_T	109734541	0	59	T	C	0.873	2.02367	1.042846	0.05754422	0.0461203	0.05502694
1	1_109735298_T_C	109735298	0	59	C	T	0.771	1.788246	0.7816356	0.0260895	0.01947522	0.02637319
1	1_109735416_A_C	109735416	0	59	C	A	0.771	1.788246	0.7816356	0.0260895	0.01947522	0.02637319
1	1_109735504_T_C	109735504	0	59	C	T	0.771	1.788246	0.7816356	0.0260895	0.01947522	0.02637319
1	1_109737063_C_T	109737063	0	59	T	C	0.771	1.788246	0.7816356	0.0260895	0.01947522	0.02637319
1	1_109737090_G_A	109737090	0	59	A	G	0.763	1.786231	0.7815462	0.02623437	0.01959323	0.02650626
1	1_109737132_T_C	109737132	0	59	C	T	0.771	1.788246	0.7816356	0.0260895	0.01947522	0.02637319
1	1_109737172_C_T	109737172	0	59	T	C	0.771	1.788246	0.7816356	0.0260895	0.01947522	0.02637319
1	1_109742452_C_T	109742452	0	59	T	C	0.822	1.991128	0.9646886	0.04383527	0.03429139	0.04256586
1	1_109742485_G_A	109742485	0	59	A	G	0.822	1.991128	0.9646886	0.04383527	0.03429139	0.04256586
1	1_109813485_C_T	109813485	0	59	T	C	0.034	-4.008354	1.901677	0.03970586	0.03078664	0.03880973
1	1_110230767_G_A	110230767	0	59	A	G	0.856	-1.570496	0.6962029	0.02815625	0.02116411	0.02826942
1	1_110581780_T_G	110581780	0	59	G	T	0.127	1.996323	1.005383	0.05216138	0.04144306	0.05013375
1	1_110741081_C_G	110741081	0	59	G	C	0.042	-3.749357	1.6781	0.02962506	0.02237112	0.02961454
1	1_110883569_A_T	110883569	0	59	T	A	0.195	-1.811802	0.8394291	0.03536237	0.02713444	0.03485385
1	1_110924353_G_A	110924353	0	59	A	G	0.195	-1.811802	0.8394291	0.03536237	0.02713444	0.03485385
1	1_110950439_C_T	110950439	0	59	T	C	0.432	1.707897	0.6766301	0.01457169	0.0103122	0.01567376
1	1_111777512_G_A	111777512	0	59	A	G	0.017	5.379311	2.586676	0.04232214	0.03300367	0.04118989
1	1_111862136_C_G	111862136	0	59	G	C	0.025	-4.865484	2.120164	0.02565387	0.01912072	0.02597291
1	1_112028515_T_C	112028515	0	59	C	T	0.068	2.694763	1.187903	0.02731971	0.02047915	0.02750244
1	1_112029160_T_A	112029160	0	59	A	T	0.025	-5.233794	2.194177	0.02060326	0.01505213	0.0213123
1	1_112031654_AACACAC_A	112031654	0	59	A	AACACAC	0.059	2.908171	1.496961	0.05727217	0.04588299	0.05477958
1	1_112032205_C_T	112032205	0	59	T	C	0.136	3.364212	1.083114	0.00301942	0.001844424	0.004188887
1	1_112033285_G_C	112033285	0	59	C	G	0.059	2.908171	1.496961	0.05727217	0.04588299	0.05477958
1	1_112106444_G_A	112106444	0	59	A	G	0.89	2.316953	0.867749	0.009997686	0.006832748	0.01130026
1	1_112281899_G_T	112281899	0	59	T	G	0.042	3.661239	1.67875	0.03356339	0.02563297	0.03321312
1	1_112298875_G_C	112298875	0	59	C	G	0.042	3.661239	1.67875	0.03356339	0.02563297	0.03321312
1	1_112303237_T_A	112303237	0	59	A	T	0.042	3.661239	1.67875	0.03356339	0.02563297	0.03321312
1	1_112303791_A_T	112303791	0	59	T	A	0.042	3.661239	1.67875	0.03356339	0.02563297	0.03321312
1	1_112305437_T_TTTAAGGGGAGG	112305437	0	59	TTTAAGGGGAGG	T	0.042	3.661239	1.67875	0.03356339	0.02563297	0.03321312
1	1_113231998_C_CT	113231998	0	59	CT	C	0.051	3.463909	1.544016	0.02899208	0.0218503	0.02903509
1	1_113245326_A_G	113245326	0	59	G	A	0.025	-5.386654	2.095895	0.01295884	0.009072006	0.01414461
1	1_113657018_AT_A	113657018	0	59	A	AT	0.203	2.40279	0.9449991	0.01390145	0.009795229	0.01503973
1	1_113658848_A_C	113658848	0	59	C	A	0.017	5.70531	2.548781	0.02933588	0.02213306	0.02934986
1	1_114189067_G_T	114189067	0	59	T	G	0.102	-2.571301	1.050805	0.01769044	0.01274476	0.01860221
1	1_114255828_T_C	114255828	0	59	C	T	0.093	-2.495132	1.094244	0.02656696	0.01986438	0.02681167
1	1_114372332_TAA_T	114372332	0	59	T	TAA	0.042	3.98803	1.670844	0.02052635	0.01499081	0.02124099
1	1_114372524_A_G	114372524	0	59	G	A	0.025	5.938276	2.132599	0.00737598	0.004900194	0.008723339
1	1_114394689_C_T	114394689	0	59	T	C	0.025	5.938276	2.132599	0.00737598	0.004900194	0.008723339
1	1_115604730_A_C	115604730	0	59	C	A	0.034	-3.887757	1.85955	0.04127643	0.03211607	0.04023875
1	1_116206407_C_T	116206407	0	59	T	C	0.025	5.219368	2.208739	0.02175576	0.01597341	0.02237949
1	1_116206951_C_G	116206951	0	59	G	C	0.144	2.991916	0.9680598	0.003155555	0.001935633	0.004339441
1	1_116310967_T_C	116310967	0	59	C	T	0.28	1.450184	0.7111198	0.04632679	0.03642011	0.04483089
1	1_116930181_A_T	116930181	0	59	T	A	0.017	8.024695	3.59936	0.02996244	0.02264912	0.02992324
1	1_116931225_G_A	116931225	0	59	A	G	0.025	8.05953	3.599789	0.02930528	0.02210788	0.02932184
1	1_116931507_C_T	116931507	0	59	T	C	0.025	8.05953	3.599789	0.02930528	0.02210788	0.02932184
1	1_116931628_C_A	116931628	0	59	A	C	0.025	8.05953	3.599789	0.02930528	0.02210788	0.02932184
1	1_116943451_G_GTTC	116943451	0	59	GTTC	G	0.025	8.05953	3.599789	0.02930528	0.02210788	0.02932184
1	1_117554104_C_T	117554104	0	59	T	C	0.025	-5.112794	2.12742	0.01971288	0.0143435	0.02048598
1	1_117656088_A_G	117656088	0	59	G	A	0.356	1.652135	0.7559864	0.03321645	0.02534421	0.03289651
1	1_117660754_C_T	117660754	0	59	T	C	0.331	1.779563	0.7515527	0.02150265	0.0157707	0.02214534
1	1_117753543_G_A	117753543	0	59	A	G	0.017	-5.213045	2.616142	0.05136479	0.0407543	0.04940976
1	1_118065654_G_A	118065654	0	59	A	G	0.025	-4.21428	2.126318	0.05258289	0.04180787	0.05051685
1	1_118598288_GATTAA_G	118598288	0	59	G	GATTAA	0.025	-4.255444	2.17706	0.05580689	0.04460644	0.0534474
1	1_143768151_ATTTCTTTCTTTC_ATTTCTTTC	143768151	0	59	ATTTCTTTC	ATTTCTTTCTTTC	0.144	2.512471	1.046436	0.01982513	0.01443268	0.02059025
1	1_144013853_T_C	144013853	0	59	C	T	0.492	8.110088	3.686659	0.03211732	0.02443115	0.03189299
1	1_144815953_A_G	144815953	0	59	G	A	0.381	-1.615865	0.6917738	0.02324364	0.01716924	0.02375376
1	1_144815968_G_A	144815968	0	59	A	G	0.398	-1.460572	0.7276514	0.04974008	0.03935238	0.04793317
1	1_144816724_G_A	144816724	0	59	A	G	0.229	2.825843	0.9343793	0.003809167	0.002378444	0.005050674
1	1_144828857_C_G	144828857	0	59	G	C	0.288	-2.079532	0.9686174	0.03630882	0.02792707	0.03571643
1	1_144852379_G_T	144852379	0	59	T	G	0.11	3.220871	1.156575	0.007369862	0.00489575	0.008717237
1	1_144852566_G_A	144852566	0	59	A	G	0.415	3.241822	1.25921	0.0128136	0.008960989	0.01400631
1	1_144859889_G_T	144859889	0	59	T	G	0.017	6.258524	2.526432	0.01640259	0.01173514	0.01739686
1	1_144863438_G_T	144863438	0	59	T	G	0.025	4.240621	2.143416	0.0529897	0.04216021	0.0508866
1	1_144879054_T_C	144879054	0	59	C	T	0.025	4.657269	2.187407	0.03782033	0.02919667	0.03709327
1	1_144906508_C_T	144906508	0	59	T	C	0.195	2.407427	0.82888	0.005321114	0.003428624	0.006641024
1	1_144952255_G_C	144952255	0	59	C	G	0.127	2.59514	1.078152	0.01953183	0.01419975	0.02031774
1	1_145298168_G_A	145298168	0	59	A	G	0.034	4.201617	1.833417	0.02584966	0.01927999	0.02615284
1	1_145302745_A_T	145302745	0	59	T	A	0.059	-3.658801	1.409495	0.01212881	0.008439101	0.01335272
1	1_145311775_T_C	145311775	0	59	C	T	0.017	5.910275	2.598386	0.02692646	0.02015779	0.02714165
1	1_145311931_C_T	145311931	0	59	T	C	0.059	3.476743	1.437892	0.01901229	0.01378793	0.01983457
1	1_145352611_C_G	145352611	0	59	G	C	0.034	4.918674	1.839584	0.009900406	0.006760119	0.0112058
1	1_145532994_GT_G	145532994	0	59	G	GT	0.415	1.712474	0.6769297	0.01436435	0.01015203	0.01547782
1	1_145533001_T_C	145533001	0	59	C	T	0.415	1.712474	0.6769297	0.01436435	0.01015203	0.01547782
1	1_145533175_T_C	145533175	0	59	C	T	0.415	1.712474	0.6769297	0.01436435	0.01015203	0.01547782
1	1_145559010_CGT_C	145559010	0	59	C	CGT	0.068	-3.29085	1.424104	0.02468961	0.01833794	0.02508604
1	1_145561116_G_A	145561116	0	59	A	G	0.178	1.479948	0.7412655	0.05092965	0.04037844	0.04901429
1	1_146395465_T_A	146395465	0	59	A	T	0.144	2.28819	1.039815	0.03206285	0.02438597	0.03184324
1	1_146454939_G_C	146454939	0	59	C	G	0.017	5.776353	2.571729	0.02881062	0.02170118	0.02886892
1	1_146684131_G_A	146684131	0	59	A	G	0.042	-3.683689	1.864094	0.0532583	0.04239297	0.05113073
1	1_146714427_G_C	146714427	0	59	C	G	0.085	2.771414	1.264202	0.03269332	0.0249093	0.03241897
1	1_146724408_G_A	146724408	0	59	A	G	0.085	2.771414	1.264202	0.03269332	0.0249093	0.03241897
1	1_146727593_G_A	146727593	0	59	A	G	0.051	-3.683368	1.865963	0.05350924	0.04261052	0.05135882
1	1_146757923_G_A	146757923	0	59	A	G	0.085	2.771414	1.264202	0.03269332	0.0249093	0.03241897
1	1_146759320_C_G	146759320	0	59	G	C	0.085	2.771414	1.264202	0.03269332	0.0249093	0.03241897
1	1_148017578_C_T	148017578	0	59	T	C	0.161	2.224723	1.084086	0.04501462	0.03529774	0.04363809
1	1_148023040_G_C	148023040	0	59	C	G	0.161	2.224723	1.084086	0.04501462	0.03529774	0.04363809
1	1_148252752_C_T	148252752	0	59	T	C	0.034	4.267381	1.843106	0.02442372	0.01812257	0.02484128
1	1_148644408_A_G	148644408	0	59	G	A	0.542	1.104947	0.494778	0.02969985	0.02243272	0.02968297
1	1_149878407_G_A	149878407	0	59	A	G	0.017	-5.992668	2.539223	0.02191615	0.01610198	0.02252782
1	1_150960350_A_C	150960350	0	59	C	A	0.339	-1.742026	0.7122009	0.01773489	0.01277973	0.01864373
1	1_151110832_G_A	151110832	0	59	A	G	0.042	3.106546	1.390868	0.02967792	0.02241466	0.02966291
1	1_151134579_T_TA	151134579	0	59	TA	T	0.271	-1.52847	0.7742006	0.05347668	0.04258229	0.05132922
1	1_151209297_CT_C	151209297	0	59	C	CT	0.085	3.144692	1.079932	0.005212125	0.003351882	0.006528385
1	1_151317183_A_C	151317183	0	59	C	A	0.059	3.652935	1.492234	0.01764724	0.01271078	0.01856185
1	1_151342812_C_T	151342812	0	59	T	C	0.017	6.213127	2.598965	0.02033677	0.01483974	0.02106515
1	1_151379818_T_C	151379818	0	59	C	T	0.017	6.213127	2.598965	0.02033677	0.01483974	0.02106515
1	1_151506526_G_A	151506526	0	59	A	G	0.042	3.56375	1.685785	0.03914938	0.03031669	0.03830326
1	1_151508061_A_C	151508061	0	59	C	A	0.475	1.386139	0.6752515	0.04495331	0.03524536	0.04358235
1	1_151681567_G_A	151681567	0	59	A	G	0.11	2.534582	1.114424	0.02694271	0.02017106	0.02715655
1	1_151732700_A_G	151732700	0	59	G	A	0.415	1.321559	0.6716189	0.05424475	0.04324866	0.05202737
1	1_151733335_T_G	151733335	0	59	G	T	0.415	1.321559	0.6716189	0.05424475	0.04324866	0.05202737
1	1_151735576_T_C	151735576	0	59	C	T	0.11	2.437194	1.029464	0.0215242	0.01578795	0.02216527
1	1_151789607_TGC_T	151789607	0	59	T	TGC	0.017	9.070443	3.544164	0.01332362	0.009351341	0.01449152
1	1_151789609_C_T	151789609	0	59	T	C	0.983	-9.070443	3.544164	0.01332362	0.009351341	0.01449152
1	1_151810663_A_C	151810663	0	59	C	A	0.085	-2.576055	1.272594	0.04790246	0.03777148	0.04626304
1	1_151810694_AGCC_A	151810694	0	59	A	AGCC	0.017	-6.699674	2.516406	0.01020092	0.00698469	0.01149737
1	1_152185792_G_A	152185792	0	59	A	G	0.763	-1.707177	0.8551983	0.05096104	0.04040555	0.04904282
1	1_152187310_C_CATGT	152187310	0	59	CATGT	C	0.119	-2.572216	1.087051	0.0215876	0.01583871	0.02222394
1	1_152187588_C_T	152187588	0	59	T	C	0.314	-2.631326	0.93831	0.006992662	0.004622436	0.008340017
1	1_152188176_G_A	152188176	0	59	A	G	0.39	-2.807683	1.14451	0.01741955	0.01253183	0.01834908
1	1_152190330_C_T	152190330	0	59	T	C	0.059	-3.708162	1.405346	0.010855	0.007475542	0.01212963
1	1_152286040_C_T	152286040	0	59	T	C	0.017	9.070443	3.544164	0.01332362	0.009351341	0.01449152
1	1_152286388_G_A	152286388	0	59	A	G	0.017	9.070443	3.544164	0.01332362	0.009351341	0.01449152
1	1_152382148_C_T	152382148	0	59	T	C	0.017	9.070443	3.544164	0.01332362	0.009351341	0.01449152
1	1_152384630_G_A	152384630	0	59	A	G	0.017	9.070443	3.544164	0.01332362	0.009351341	0.01449152
1	1_152483959_G_A	152483959	0	59	A	G	0.017	5.776353	2.571729	0.02881062	0.02170118	0.02886892
1	1_152636671_C_T	152636671	0	59	T	C	0.017	9.070443	3.544164	0.01332362	0.009351341	0.01449152
1	1_152637043_C_CAGA	152637043	0	59	CAGA	C	0.017	9.070443	3.544164	0.01332362	0.009351341	0.01449152
1	1_152648707_C_A	152648707	0	59	A	C	0.017	9.070443	3.544164	0.01332362	0.009351341	0.01449152
1	1_152648950_T_C	152648950	0	59	C	T	0.017	9.070443	3.544164	0.01332362	0.009351341	0.01449152
1	1_152671436_G_A	152671436	0	59	A	G	0.017	9.070443	3.544164	0.01332362	0.009351341	0.01449152
1	1_152816340_A_G	152816340	0	59	G	A	0.017	9.070443	3.544164	0.01332362	0.009351341	0.01449152
1	1_152856995_C_G	152856995	0	59	G	C	0.017	9.070443	3.544164	0.01332362	0.009351341	0.01449152
1	1_152857102_G_A	152857102	0	59	A	G	0.017	9.070443	3.544164	0.01332362	0.009351341	0.01449152
1	1_153122528_G_A	153122528	0	59	A	G	0.017	9.070443	3.544164	0.01332362	0.009351341	0.01449152
1	1_153317723_T_C	153317723	0	59	C	T	0.025	5.325122	2.1175	0.01491955	0.01058137	0.0160021
1	1_153743234_T_C	153743234	0	59	C	T	0.517	-1.264402	0.627169	0.04878162	0.03852718	0.04706208
1	1_153744496_CGGT_CGGTGGT	153744496	0	59	CGGTGGT	CGGT	0.025	5.89905	2.080847	0.006436228	0.004221745	0.007779782
1	1_153750738_G_C	153750738	0	59	C	G	0.034	5.46281	1.815522	0.00397749	0.002493686	0.005231124
1	1_153751799_CTG_C	153751799	0	59	C	CTG	0.025	4.698063	2.133665	0.03196567	0.02430539	0.03175447
1	1_153907305_G_GC	153907305	0	59	GC	G	0.034	5.322554	1.779934	0.004191167	0.002640632	0.005458803
1	1_153907306_TTGC_TGCTGC	153907306	0	59	TGCTGC	TTGC	0.034	5.322554	1.779934	0.004191167	0.002640632	0.005458803
1	1_154031217_A_G	154031217	0	59	G	A	0.068	5.105795	1.341646	0.0003628521	0.0001810424	0.0008523124
1	1_154185122_G_C	154185122	0	59	C	G	0.017	9.070443	3.544164	0.01332362	0.009351341	0.01449152
1	1_154186475_TG_T	154186475	0	59	T	TG	0.017	9.070443	3.544164	0.01332362	0.009351341	0.01449152
1	1_154580458_C_A	154580458	0	59	A	C	0.153	1.891993	0.8343492	0.02737675	0.02052579	0.02755476
1	1_154842199_GGCT_GGCTGCTGCTGCTGCT	154842199	0	59	GGCTGCTGCTGCTGCT	GGCT	0.314	-1.930777	0.8995421	0.0363513	0.02796269	0.03575514
1	1_154938214_C_G	154938214	0	59	G	C	0.068	2.923145	1.419667	0.04432735	0.03471101	0.04301327
1	1_154987526_C_T	154987526	0	59	T	C	0.424	-1.526112	0.7687223	0.05220447	0.04148034	0.05017291
1	1_155003989_A_C	155003989	0	59	C	A	0.025	-4.699491	2.0972	0.02917066	0.02199714	0.0291986
1	1_155003994_CA_C	155003994	0	59	C	CA	0.017	5.379311	2.586676	0.04232214	0.03300367	0.04118989
1	1_155003999_CA_C	155003999	0	59	C	CA	0.017	5.379311	2.586676	0.04232214	0.03300367	0.04118989
1	1_155028522_G_A	155028522	0	59	A	G	0.551	1.880004	0.6417193	0.004963147	0.003177129	0.006270043
1	1_155030557_A_C	155030557	0	59	C	A	0.551	1.880004	0.6417193	0.004963147	0.003177129	0.006270043
1	1_155058663_G_A	155058663	0	59	A	G	0.169	-1.74877	0.8688415	0.04913737	0.0388333	0.0473854
1	1_155058816_T_C	155058816	0	59	C	T	0.076	4.249429	1.393957	0.003557649	0.002207132	0.004779082
1	1_155058820_T_TGCTGCC	155058820	0	59	TGCTGCC	T	0.076	4.249429	1.393957	0.003557649	0.002207132	0.004779082
1	1_155059035_T_TG	155059035	0	59	TG	T	0.068	4.242861	1.393906	0.003604283	0.002238812	0.004829624
1	1_155160941_C_T	155160941	0	59	T	C	0.042	3.495696	1.676829	0.04183928	0.03259358	0.04075073
1	1_155167786_A_G	155167786	0	59	G	A	0.11	2.40318	1.137793	0.03931547	0.03045689	0.03845443
1	1_155764808_C_G	155764808	0	59	G	C	0.051	-3.19871	1.542738	0.04291994	0.03351195	0.04173355
1	1_156038058_C_A	156038058	0	59	A	C	0.025	5.545714	2.058768	0.009394962	0.006383823	0.01071373
1	1_156498673_T_A	156498673	0	59	A	T	0.322	1.675357	0.6870964	0.01807609	0.01304841	0.01896223
1	1_156499969_T_C	156499969	0	59	C	T	0.322	1.675357	0.6870964	0.01807609	0.01304841	0.01896223
1	1_156500128_T_C	156500128	0	59	C	T	0.212	1.715746	0.7609968	0.02823635	0.02122979	0.02834283
1	1_156505061_C_T	156505061	0	59	T	C	0.212	1.715746	0.7609968	0.02823635	0.02122979	0.02834283
1	1_156518379_G_A	156518379	0	59	A	G	0.28	1.531187	0.7363692	0.04234585	0.03302382	0.04121146
1	1_156640658_G_C	156640658	0	59	C	G	0.017	5.288123	2.612949	0.04794924	0.03781166	0.04630556
1	1_156786574_T_A	156786574	0	59	A	T	0.025	4.790593	2.099539	0.02647179	0.01978675	0.02672429
1	1_156786575_C_A	156786575	0	59	A	C	0.025	4.790593	2.099539	0.02647179	0.01978675	0.02672429
1	1_156894356_T_TGCC	156894356	0	59	TGCC	T	0.025	4.297201	2.12829	0.04845443	0.0382458	0.04676471
1	1_156894363_A_C	156894363	0	59	C	A	0.212	2.209749	0.9403418	0.02246128	0.01653957	0.02303161
1	1_156894367_G_C	156894367	0	59	C	G	0.22	2.371722	0.9301306	0.01364697	0.009599523	0.01479848
1	1_156917281_G_A	156917281	0	59	A	G	0.017	5.781143	2.573248	0.02877419	0.02167125	0.02883555
1	1_157485561_G_A	157485561	0	59	A	G	0.636	2.062654	0.6782521	0.003632276	0.002257847	0.004859921
1	1_157550066_T_C	157550066	0	59	C	T	0.407	1.690804	0.6846713	0.01672251	0.0119853	0.01769675
1	1_157557701_G_A	157557701	0	59	A	G	0.441	1.483642	0.6789407	0.03322981	0.02535532	0.0329087
1	1_157567808_C_T	157567808	0	59	T	C	0.017	5.776353	2.571729	0.02881062	0.02170118	0.02886892
1	1_157670290_C_G	157670290	0	59	G	C	0.432	-1.327672	0.6189914	0.03647715	0.02806824	0.03586981
1	1_158298679_TA_TAA	158298679	0	59	TAA	TA	0.102	-2.431492	1.20172	0.04799927	0.03785464	0.04635104
1	1_158324138_T_C	158324138	0	59	C	T	0.017	5.288123	2.612949	0.04794924	0.03781166	0.04630556
1	1_158587400_T_G	158587400	0	59	G	T	0.051	-3.720514	1.655647	0.02873788	0.02164143	0.0288023
1	1_158587772_C_T	158587772	0	59	T	C	0.042	-3.729074	1.655971	0.02841809	0.02137888	0.02850935
1	1_158592781_G_A	158592781	0	59	A	G	0.042	-3.729074	1.655971	0.02841809	0.02137888	0.02850935
1	1_158592847_G_A	158592847	0	59	A	G	0.042	-3.729074	1.655971	0.02841809	0.02137888	0.02850935
1	1_158592901_C_G	158592901	0	59	G	C	0.042	-3.729074	1.655971	0.02841809	0.02137888	0.02850935
1	1_158604391_T_C	158604391	0	59	C	T	0.042	-3.729074	1.655971	0.02841809	0.02137888	0.02850935
1	1_158615217_T_C	158615217	0	59	C	T	0.042	-3.729074	1.655971	0.02841809	0.02137888	0.02850935
1	1_158637865_GAAAA_GAA	158637865	0	59	GAA	GAAAA	0.076	4.478944	1.366636	0.001835393	0.001069476	0.002829795
1	1_158644105_T_A	158644105	0	59	A	T	0.398	-1.30923	0.6697867	0.05580418	0.04460408	0.05344494
1	1_158647522_A_G	158647522	0	59	G	A	0.585	1.304847	0.6692489	0.05641015	0.04513166	0.05399584
1	1_158647669_T_C	158647669	0	59	C	T	0.585	1.304847	0.6692489	0.05641015	0.04513166	0.05399584
1	1_158654852_A_G	158654852	0	59	G	A	0.585	1.304847	0.6692489	0.05641015	0.04513166	0.05399584
1	1_158687163_G_A	158687163	0	59	A	G	0.381	1.88408	0.6939871	0.00888384	0.006005181	0.01021384
1	1_158687224_G_A	158687224	0	59	A	G	0.364	1.880514	0.6938596	0.008993691	0.006086394	0.01032149
1	1_158725080_C_T	158725080	0	59	T	C	0.127	1.94458	0.8797726	0.03134051	0.0237875	0.0311833
1	1_158736215_G_A	158736215	0	59	A	G	0.941	3.335914	1.554597	0.03639824	0.02800205	0.03579791
1	1_158815342_TTTTAAG_T	158815342	0	59	T	TTTTAAG	0.102	3.026007	1.187015	0.01366866	0.009616193	0.01481905
1	1_159283494_T_C	159283494	0	59	C	T	0.068	2.807224	1.40932	0.05144904	0.0408271	0.04948633
1	1_159778699_G_A	159778699	0	59	A	G	0.475	-1.486638	0.7144736	0.04221511	0.03291273	0.04109255
1	1_159825061_G_C	159825061	0	59	C	G	0.415	-1.542796	0.6829183	0.02793538	0.02098309	0.02806699
1	1_159846372_G_A	159846372	0	59	A	G	0.017	5.855472	2.567479	0.02654174	0.0198438	0.02678851
1	1_159850401_C_G	159850401	0	59	G	C	0.11	-2.654841	1.148362	0.02462861	0.01828851	0.02502989
1	1_159858289_G_GACACAAGAA	159858289	0	59	GACACAAGAA	G	0.025	4.299911	2.139971	0.04951113	0.03915513	0.04772509
1	1_159897327_C_T	159897327	0	59	T	C	0.153	1.819286	0.8924759	0.04641218	0.03649324	0.0449085
1	1_159897681_TAAA_T	159897681	0	59	T	TAAA	0.127	2.87952	1.037989	0.007584844	0.005052104	0.008931382
1	1_159904202_G_A	159904202	0	59	A	G	0.11	2.09025	1.0325	0.04788101	0.03775306	0.04624355
1	1_160281645_A_T	160281645	0	59	T	A	0.025	-4.275386	2.162049	0.05310232	0.04225779	0.05098896
1	1_160616768_G_A	160616768	0	59	A	G	0.042	-3.832716	1.676375	0.02618406	0.01955225	0.02646005
1	1_161161284_G_C	161161284	0	59	C	G	0.11	-2.11618	1.060805	0.0511131	0.04053686	0.04918102
1	1_161172233_C_A	161172233	0	59	A	C	0.102	-2.119423	1.060934	0.05079748	0.04026434	0.04889417
1	1_161284224_A_AGT	161284224	0	59	AGT	A	0.042	-3.58936	1.669265	0.03602959	0.02769303	0.03546199
1	1_161293485_T_TTA	161293485	0	59	TTA	T	0.042	-3.58936	1.669265	0.03602959	0.02769303	0.03546199
1	1_161293508_C_T	161293508	0	59	T	C	0.042	-3.58936	1.669265	0.03602959	0.02769303	0.03546199
1	1_161310519_C_T	161310519	0	59	T	C	0.042	-3.58936	1.669265	0.03602959	0.02769303	0.03546199
1	1_161332346_C_G	161332346	0	59	G	C	0.042	-3.58936	1.669265	0.03602959	0.02769303	0.03546199
1	1_161334735_G_A	161334735	0	59	A	G	0.042	-3.58936	1.669265	0.03602959	0.02769303	0.03546199
1	1_161335281_T_A	161335281	0	59	A	T	0.042	-3.58936	1.669265	0.03602959	0.02769303	0.03546199
1	1_161335955_A_C	161335955	0	59	C	A	0.042	-3.58936	1.669265	0.03602959	0.02769303	0.03546199
1	1_161337604_G_A	161337604	0	59	A	G	0.042	-3.58936	1.669265	0.03602959	0.02769303	0.03546199
1	1_161512731_G_A	161512731	0	59	A	G	0.119	-2.220524	1.014683	0.03298648	0.02515294	0.0326866
1	1_161518757_T_C	161518757	0	59	C	T	0.119	-2.220524	1.014683	0.03298648	0.02515294	0.0326866
1	1_161519440_C_T	161519440	0	59	T	C	0.051	3.779082	1.543358	0.01761884	0.01268845	0.01853532
1	1_161561151_G_A	161561151	0	59	A	G	0.042	3.66371	1.732119	0.03904601	0.03022946	0.03820917
1	1_161641384_G_A	161641384	0	59	A	G	0.153	2.252106	0.8811024	0.01343493	0.009436714	0.01459724
1	1_161643065_G_C	161643065	0	59	C	G	0.042	-3.441927	1.677518	0.04505166	0.03532938	0.04367176
1	1_161680258_G_A	161680258	0	59	A	G	0.661	-1.737765	0.7716424	0.02840873	0.02137121	0.02850078
1	1_161683136_G_A	161683136	0	59	A	G	0.568	-1.970149	0.6977694	0.006639119	0.004367492	0.007984611
1	1_161695639_G_T	161695639	0	59	T	G	0.864	-2.19339	0.9625194	0.02665786	0.01993853	0.02689511
1	1_161822959_C_T	161822959	0	59	T	C	0.915	-2.237289	1.136674	0.0541792	0.04319175	0.05196778
1	1_161953400_G_A	161953400	0	59	A	G	0.034	5.787106	2.567154	0.02825741	0.02124707	0.02836213
1	1_161953930_A_G	161953930	0	59	G	A	0.017	8.024695	3.59936	0.02996244	0.02264912	0.02992324
1	1_162326851_C_T	162326851	0	59	T	C	0.017	5.314155	2.687449	0.05311064	0.042265	0.05099652
1	1_162470961_A_AT	162470961	0	59	AT	A	0.432	1.894869	0.895424	0.03895633	0.0301538	0.03812754
1	1_162740121_G_A	162740121	0	59	A	G	0.034	4.16399	1.873668	0.03046719	0.02306555	0.03038493
1	1_162822771_A_C	162822771	0	59	C	A	0.907	3.119799	1.168775	0.01001828	0.006848133	0.01132025
1	1_162824553_G_A	162824553	0	59	A	G	0.195	2.63051	0.9378156	0.006981192	0.004614146	0.008328516
1	1_162825457_C_A	162825457	0	59	A	C	0.195	2.63051	0.9378156	0.006981192	0.004614146	0.008328516
1	1_165623451_C_T	165623451	0	59	T	C	0.144	2.105828	1.032706	0.04634334	0.03643428	0.04484593
1	1_166039898_C_G	166039898	0	59	G	C	0.153	2.538505	0.9261142	0.008287053	0.005565605	0.009626951
1	1_166818566_A_G	166818566	0	59	G	A	0.22	-1.728949	0.8306963	0.04215989	0.03286582	0.04104233
1	1_167024945_TC_T	167024945	0	59	T	TC	0.017	5.963674	2.562693	0.02373885	0.01756879	0.02421038
1	1_167893778_G_GA	167893778	0	59	GA	G	0.068	3.549284	1.333124	0.0102014	0.006985044	0.01149783
1	1_168262526_TG_T	168262526	0	59	T	TG	0.144	2.182953	1.042292	0.04093403	0.03182586	0.03992725
1	1_168511205_C_G	168511205	0	59	G	C	0.017	-4.055044	1.843329	0.03211732	0.02443115	0.03189299
1	1_168513067_C_A	168513067	0	59	A	C	0.212	-1.74597	0.8330118	0.04078631	0.03170072	0.03979286
1	1_168513214_C_T	168513214	0	59	T	C	0.127	-2.378442	0.9866102	0.01935465	0.0140592	0.02015304
1	1_168513228_G_A	168513228	0	59	A	G	0.203	-1.698379	0.8505537	0.05089861	0.04035165	0.04898608
1	1_168549362_G_A	168549362	0	59	A	G	0.017	-4.055044	1.843329	0.03211732	0.02443115	0.03189299
1	1_169510524_A_G	169510524	0	59	G	A	0.288	1.419217	0.6998708	0.04752404	0.03744658	0.04591911
1	1_169515874_T_A	169515874	0	59	A	T	0.186	1.92521	0.7935994	0.0186406	0.01349393	0.0194885
1	1_169519304_A_G	169519304	0	59	G	A	0.017	-5.992668	2.539223	0.02191615	0.01610198	0.02252782
1	1_170135669_C_T	170135669	0	59	T	C	0.254	1.702473	0.8005148	0.03802895	0.02937226	0.03728324
1	1_170135760_T_C	170135760	0	59	C	T	0.254	1.702473	0.8005148	0.03802895	0.02937226	0.03728324
1	1_171080080_G_A	171080080	0	59	A	G	0.161	-1.998017	0.9513497	0.04039797	0.03137193	0.03943954
1	1_171311003_A_C	171311003	0	59	C	A	0.5	1.539939	0.689429	0.02966998	0.02240812	0.02965564
1	1_172577864_CTT_C	172577864	0	59	C	CTT	0.068	2.748144	1.410275	0.0565401	0.04524486	0.05411398
1	1_173157764_G_A	173157764	0	59	A	G	0.178	-1.913235	0.7751121	0.01677199	0.01202403	0.01774312
1	1_175335336_C_A	175335336	0	59	A	C	0.017	6.325446	2.54629	0.01611826	0.01151318	0.01713004
1	1_176671918_A_T	176671918	0	59	T	A	0.093	2.370416	1.204574	0.05423008	0.04323592	0.05201403
1	1_176671946_A_T	176671946	0	59	T	A	0.085	2.920389	1.254895	0.02373393	0.01756481	0.02420584
1	1_176679384_G_T	176679384	0	59	T	G	0.085	2.920389	1.254895	0.02373393	0.01756481	0.02420584
1	1_177930096_T_C	177930096	0	59	C	T	0.203	2.227664	0.9618567	0.02438352	0.01809003	0.02480427
1	1_177930894_C_T	177930894	0	59	T	C	0.754	1.739464	0.7173164	0.01868505	0.01352906	0.0195299
1	1_178062359_G_A	178062359	0	59	A	G	0.178	-1.875936	0.9211402	0.04661245	0.03666481	0.04509054
1	1_178490387_A_G	178490387	0	59	G	A	0.017	-5.331133	2.67068	0.05096826	0.04041178	0.04904938
1	1_178854162_C_T	178854162	0	59	T	C	0.61	1.460682	0.7126884	0.04527986	0.03552439	0.04387921
1	1_178858891_A_G	178858891	0	59	G	A	0.034	3.726393	1.889612	0.053736	0.04280718	0.05156493
1	1_179052006_G_T	179052006	0	59	T	G	0.39	-1.663653	0.6705033	0.01623945	0.01160774	0.0172438
1	1_179084080_T_G	179084080	0	59	G	T	0.059	2.962503	1.505293	0.05420505	0.04321419	0.05199127
1	1_179089292_G_A	179089292	0	59	A	G	0.025	-4.651257	2.12566	0.03300511	0.02516844	0.03270361
1	1_179198305_G_C	179198305	0	59	C	G	0.186	1.965648	0.9661195	0.04681586	0.03683914	0.04527543
1	1_179198307_CA_C	179198307	0	59	C	CA	0.017	-5.878063	2.65171	0.03087507	0.02340251	0.03075787
1	1_179198322_G_C	179198322	0	59	C	G	0.076	2.623675	1.348768	0.05696041	0.04561115	0.05449613
1	1_179198323_A_C	179198323	0	59	C	A	0.076	2.623675	1.348768	0.05696041	0.04561115	0.05449613
1	1_179198333_CGG_C	179198333	0	59	C	CGG	0.042	-3.350699	1.709725	0.05519003	0.04406988	0.05288664
1	1_179452275_G_A	179452275	0	59	A	G	0.136	2.071422	0.9235811	0.02903493	0.02188553	0.02907433
1	1_179520254_C_G	179520254	0	59	G	C	0.61	-1.628253	0.6884144	0.02164093	0.01588142	0.02227328
1	1_179520506_G_A	179520506	0	59	A	G	0.61	-1.628253	0.6884144	0.02164093	0.01588142	0.02227328
1	1_179609589_G_T	179609589	0	59	T	G	0.203	1.70195	0.7537359	0.0280086	0.02104308	0.0281341
1	1_180217656_G_A	180217656	0	59	A	G	0.093	-2.501285	1.198195	0.04157185	0.03236662	0.04050747
1	1_180235728_C_T	180235728	0	59	T	C	0.017	5.776353	2.571729	0.02881062	0.02170118	0.02886892
1	1_180897569_C_T	180897569	0	59	T	C	0.458	1.335589	0.6740313	0.05263666	0.04185443	0.05056572
1	1_181702616_G_A	181702616	0	59	A	G	0.017	5.288123	2.612949	0.04794924	0.03781166	0.04630556
1	1_181731673_C_A	181731673	0	59	A	C	0.017	7.537209	2.459149	0.003394899	0.002096876	0.004601991
1	1_182825772_T_A	182825772	0	59	A	T	0.017	-5.874691	2.61302	0.02866509	0.02158164	0.02873563
1	1_183176970_GT_GTT	183176970	0	59	GTT	GT	0.237	2.386508	0.8688258	0.008160048	0.005472424	0.009501566
1	1_185278318_GAATTAT_G	185278318	0	59	G	GAATTAT	0.017	7.310418	2.488465	0.004853126	0.003100164	0.006155407
1	1_186368092_A_C	186368092	0	59	C	A	0.025	5.246791	2.072503	0.01429682	0.01009992	0.01541397
1	1_186645851_AAAAT_A	186645851	0	59	A	AAAAT	0.042	3.37314	1.681452	0.049867	0.03946175	0.04804852
1	1_193028934_G_A	193028934	0	59	A	G	0.017	5.18611	2.624383	0.05325862	0.04239325	0.05113103
1	1_193051685_G_A	193051685	0	59	A	G	0.72	-1.409262	0.7271953	0.05786638	0.04640147	0.05531988
1	1_193074371_A_G	193074371	0	59	G	A	0.754	-1.683736	0.7114851	0.0215731	0.0158271	0.02221052
1	1_193074651_T_A	193074651	0	59	A	T	0.754	-1.683736	0.7114851	0.0215731	0.0158271	0.02221052
1	1_196800889_C_T	196800889	0	59	T	C	0.017	-6.290435	2.525101	0.01583771	0.01129452	0.01686652
1	1_196874192_A_G	196874192	0	59	G	A	0.017	-5.213045	2.616142	0.05136479	0.0407543	0.04940976
1	1_196882038_A_T	196882038	0	59	T	A	0.017	-6.290435	2.525101	0.01583771	0.01129452	0.01686652
1	1_197009631_CA_C	197009631	0	59	C	CA	0.042	3.653298	1.718351	0.03808767	0.02942169	0.03733671
1	1_200080464_CAA_CA	200080464	0	59	CA	CAA	0.068	-2.812439	1.388863	0.04782394	0.03770405	0.04619168
1	1_200567596_T_G	200567596	0	59	G	T	0.339	1.536589	0.7229884	0.03815023	0.02947437	0.03739367
1	1_200842341_T_C	200842341	0	59	C	T	0.025	4.244367	2.118016	0.05010413	0.03966616	0.04826403
1	1_201434740_G_A	201434740	0	59	A	G	0.568	-1.831797	0.6223487	0.004777758	0.003047533	0.006076702
1	1_201453829_G_A	201453829	0	59	A	G	0.017	5.482209	2.583859	0.0384667	0.02974096	0.0376818
1	1_201754411_T_TC	201754411	0	59	TC	T	0.229	2.109282	0.9335258	0.0279118	0.02096377	0.02804537
1	1_201816639_ATCTTTT_A	201816639	0	59	A	ATCTTTT	0.322	-1.770484	0.8273596	0.03689641	0.02842008	0.03625178
1	1_201826340_C_T	201826340	0	59	T	C	0.322	-1.770484	0.8273596	0.03689641	0.02842008	0.03625178
1	1_201860626_A_G	201860626	0	59	G	A	0.678	1.770484	0.8273596	0.03689641	0.02842008	0.03625178
1	1_201869257_G_A	201869257	0	59	A	G	0.322	-1.770484	0.8273596	0.03689641	0.02842008	0.03625178
1	1_202092046_C_T	202092046	0	59	T	C	0.839	-2.5127	0.9597672	0.01145162	0.007925635	0.01270376
1	1_202092360_G_A	202092360	0	59	A	G	0.89	-2.176984	1.063999	0.04563503	0.03582806	0.04420208
1	1_202092415_A_G	202092415	0	59	G	A	0.89	-2.176984	1.063999	0.04563503	0.03582806	0.04420208
1	1_202092580_T_C	202092580	0	59	C	T	0.89	-2.176984	1.063999	0.04563503	0.03582806	0.04420208
1	1_202096815_G_A	202096815	0	59	A	G	0.797	-1.983291	0.9149372	0.03461016	0.02650579	0.034168
1	1_202304868_T_C	202304868	0	59	C	T	0.483	1.299023	0.6629991	0.05524706	0.04411946	0.05293847
1	1_202569555_C_T	202569555	0	59	T	C	0.017	-8.092446	3.690059	0.03263131	0.02485779	0.03236236
1	1_202705455_G_C	202705455	0	59	C	G	0.805	-1.97332	0.8870975	0.03031759	0.02294206	0.03024811
1	1_202917600_C_T	202917600	0	59	T	C	0.017	6.408172	2.548234	0.01492202	0.01058328	0.01600442
1	1_202990110_CTTTT_CTTTTT	202990110	0	59	CTTTTT	CTTTT	0.042	-3.964042	1.682233	0.02211034	0.01625775	0.02270734
1	1_203004367_C_T	203004367	0	59	T	C	0.195	-1.636248	0.799047	0.04546119	0.0356794	0.04404404
1	1_203025209_G_C	203025209	0	59	C	G	0.237	1.987391	0.8898028	0.02967873	0.02241533	0.02966365
1	1_203028371_G_T	203028371	0	59	T	G	0.178	-3.368992	0.9234266	0.000595391	0.0003115532	0.001214976
1	1_203032922_C_T	203032922	0	59	T	C	0.398	2.064079	0.7609508	0.008939619	0.006046406	0.01026851
1	1_204110547_C_T	204110547	0	59	T	C	0.034	4.049754	1.842387	0.03224849	0.02453997	0.03201279
1	1_204110660_C_T	204110660	0	59	T	C	0.144	2.419712	1.085123	0.02993298	0.02262484	0.02989629
1	1_204234196_GGT_GGTGT	204234196	0	59	GGTGT	GGT	0.305	1.899709	0.8558446	0.03065983	0.02322465	0.03056109
1	1_204394888_CA_C	204394888	0	59	C	CA	0.068	3.167473	1.347399	0.02241428	0.0165018	0.02298818
1	1_204396728_A_C	204396728	0	59	C	A	0.068	3.167473	1.347399	0.02241428	0.0165018	0.02298818
1	1_204396745_GA_G	204396745	0	59	G	GA	0.068	3.167473	1.347399	0.02241428	0.0165018	0.02298818
1	1_204396830_G_A	204396830	0	59	A	G	0.068	3.167473	1.347399	0.02241428	0.0165018	0.02298818
1	1_204399061_A_G	204399061	0	59	G	A	0.068	3.167473	1.347399	0.02241428	0.0165018	0.02298818
1	1_204399064_G_A	204399064	0	59	A	G	0.068	3.167473	1.347399	0.02241428	0.0165018	0.02298818
1	1_204889909_G_A	204889909	0	59	A	G	0.076	2.739794	1.326023	0.04362289	0.03411042	0.04237276
1	1_205814695_A_G	205814695	0	59	G	A	0.102	-2.601702	1.1464	0.02725803	0.02042872	0.02744586
1	1_205817018_T_C	205817018	0	59	C	T	0.102	-2.601702	1.1464	0.02725803	0.02042872	0.02744586
1	1_205819039_C_T	205819039	0	59	T	C	0.102	-2.601702	1.1464	0.02725803	0.02042872	0.02744586
1	1_205819104_G_A	205819104	0	59	A	G	0.102	-2.601702	1.1464	0.02725803	0.02042872	0.02744586
1	1_205896293_T_G	205896293	0	59	G	T	0.11	2.264881	1.100353	0.04439824	0.03477149	0.04307772
1	1_206224635_G_C	206224635	0	59	C	G	0.068	2.985693	1.402107	0.03779386	0.0291744	0.03706916
1	1_206224830_G_C	206224830	0	59	C	G	0.017	-5.048938	2.601462	0.05750913	0.04608969	0.05499503
1	1_206516335_C_T	206516335	0	59	T	C	0.017	8.074087	2.468553	0.001871286	0.0010924	0.002872687
1	1_206516394_TG_T	206516394	0	59	T	TG	0.017	-5.048938	2.601462	0.05750913	0.04608969	0.05499503
1	1_206566903_G_A	206566903	0	59	A	G	0.161	-1.994416	1.015186	0.05461732	0.04357219	0.05236603
1	1_206589233_TC_T	206589233	0	59	T	TC	0.017	-5.048938	2.601462	0.05750913	0.04608969	0.05499503
1	1_206652404_G_A	206652404	0	59	A	G	0.034	4.326072	1.852361	0.02326565	0.01718699	0.02377407
1	1_206666529_C_A	206666529	0	59	A	C	0.025	4.416853	2.123649	0.04230128	0.03298595	0.04117092
1	1_207074905_T_C	207074905	0	59	C	T	0.415	-1.718153	0.6717571	0.01337699	0.009392264	0.01454221
1	1_207087435_C_T	207087435	0	59	T	C	0.415	-1.822055	0.6721548	0.008980736	0.006076812	0.0103088
1	1_207109116_C_T	207109116	0	59	T	C	0.407	-1.901614	0.6550288	0.005340703	0.003442433	0.006661241
1	1_207109167_G_A	207109167	0	59	A	G	0.407	-1.901614	0.6550288	0.005340703	0.003442433	0.006661241
1	1_207110936_T_C	207110936	0	59	C	T	0.39	-1.321777	0.6788737	0.05674188	0.04542067	0.05429743
1	1_207139046_A_G	207139046	0	59	G	A	0.136	-2.650042	0.942644	0.006862328	0.004528309	0.008209212
1	1_207140440_C_T	207140440	0	59	T	C	0.136	-2.650042	0.942644	0.006862328	0.004528309	0.008209212
1	1_207143422_A_G	207143422	0	59	G	A	0.39	-1.321777	0.6788737	0.05674188	0.04542067	0.05429743
1	1_207228204_T_G	207228204	0	59	G	T	0.034	4.489164	1.822752	0.01700365	0.01220549	0.01796004
1	1_207532861_CTTTTTTT_CTTTTTTTT	207532861	0	59	CTTTTTTTT	CTTTTTTT	0.331	2.17759	0.9346012	0.02357563	0.01743701	0.02405992
1	1_207760772_A_G	207760772	0	59	G	A	0.017	-5.048368	2.599012	0.05730923	0.04591532	0.05481328
1	1_207782707_A_G	207782707	0	59	G	A	0.059	-3.429426	1.446866	0.02137722	0.01567032	0.02202925
1	1_207959070_T_C	207959070	0	59	C	T	0.203	-1.625878	0.8003075	0.04713086	0.03710923	0.04556174
1	1_208062471_A_C	208062471	0	59	C	A	0.356	-1.671363	0.6414089	0.01182117	0.00820551	0.01305825
1	1_209782343_A_G	209782343	0	59	G	A	0.407	1.800922	0.7327083	0.01721536	0.01237152	0.01815814
1	1_209936074_C_CTTAGTAACTAGCTGTTACTAAGAGAAAGGAAGCTTTCCTT	209936074	0	59	CTTAGTAACTAGCTGTTACTAAGAGAAAGGAAGCTTTCCTT	C	0.025	3.26139	1.636483	0.05133308	0.04072689	0.04938094
1	1_209962944_A_G	209962944	0	59	G	A	0.017	5.192006	2.570964	0.04841233	0.03820961	0.04672645
1	1_210407337_T_A	210407337	0	59	A	T	0.034	4.235842	1.900429	0.03000411	0.02268348	0.02996137
1	1_210414879_CT_C	210414879	0	59	C	CT	0.153	-2.024133	1.01581	0.05136663	0.04075589	0.04941144
1	1_210857483_GGA_G	210857483	0	59	G	GGA	0.127	3.484548	1.052433	0.001661858	0.0009592543	0.002620395
1	1_211836789_T_C	211836789	0	59	C	T	0.212	1.816636	0.8507645	0.03728966	0.02875042	0.03660998
1	1_211840498_T_C	211840498	0	59	C	T	0.186	2.288665	0.9142787	0.01536243	0.01092488	0.01641944
1	1_212529959_T_C	212529959	0	59	C	T	0.025	-4.731874	2.097212	0.02812515	0.02113862	0.02824092
1	1_212560327_A_G	212560327	0	59	G	A	0.983	-6.325709	2.549831	0.01625437	0.01161939	0.0172578
1	1_212870292_C_T	212870292	0	59	T	C	0.102	3.326156	1.04322	0.002381475	0.001422412	0.003469385
1	1_212873074_C_T	212873074	0	59	T	C	0.093	3.434304	1.221855	0.006872666	0.004535769	0.008219596
1	1_212873096_T_C	212873096	0	59	C	T	0.093	3.434304	1.221855	0.006872666	0.004535769	0.008219596
1	1_212965095_G_A	212965095	0	59	A	G	0.144	2.216423	1.070582	0.04322052	0.03376775	0.04200688
1	1_213031464_C_G	213031464	0	59	G	C	0.051	3.298627	1.547833	0.0376477	0.02905144	0.03693606
1	1_213134651_C_T	213134651	0	59	T	C	0.068	3.004562	1.35691	0.03105214	0.02354891	0.03091973
1	1_213139741_TG_T	213139741	0	59	T	TG	0.076	3.121455	1.275404	0.01767101	0.01272948	0.01858406
1	1_213140387_C_T	213140387	0	59	T	C	0.076	3.121455	1.275404	0.01767101	0.01272948	0.01858406
1	1_213161834_T_C	213161834	0	59	C	T	0.042	4.092019	1.658809	0.01683472	0.01207314	0.01780187
1	1_214818223_T_A	214818223	0	59	A	T	0.068	2.857042	1.45256	0.05434181	0.04333292	0.05211559
1	1_215345300_CAT_C	215345300	0	59	C	CAT	0.034	4.052991	1.890959	0.03660679	0.028177	0.03598793
1	1_215807744_A_G	215807744	0	59	G	A	0.025	4.460692	2.14386	0.04222108	0.03291781	0.04109799
1	1_215916734_G_A	215916734	0	59	A	G	0.025	4.45544	2.16518	0.04445339	0.03481855	0.04312785
1	1_216051287_A_G	216051287	0	59	G	A	0.254	2.92515	0.8541617	0.001182918	0.0006610356	0.002021003
1	1_216172380_A_G	216172380	0	59	G	A	0.542	1.556587	0.6861376	0.02731203	0.02047287	0.02749539
1	1_216371793_A_G	216371793	0	59	G	A	0.017	5.032953	2.585781	0.05681792	0.04548695	0.05436657
1	1_216538391_C_T	216538391	0	59	T	C	0.059	3.403997	1.437631	0.02150616	0.01577351	0.02214858
1	1_216880662_G_A	216880662	0	59	A	G	0.127	-2.234441	0.8451849	0.01071108	0.0073673	0.01199077
1	1_217688272_G_T	217688272	0	59	T	G	0.076	2.822505	1.296477	0.03386643	0.02588541	0.03348962
1	1_217804325_G_A	217804325	0	59	A	G	0.627	-1.483769	0.747011	0.05208818	0.04137973	0.05006722
1	1_220100497_CA_C	220100497	0	59	C	CA	0.042	3.507133	1.396871	0.01507553	0.01070224	0.01614916
1	1_220154768_C_T	220154768	0	59	T	C	0.322	1.594116	0.6488264	0.01725736	0.01240448	0.01819743
1	1_220321023_A_G	220321023	0	59	G	A	0.169	2.442352	0.8387009	0.005210261	0.00335057	0.006526456
1	1_220368733_C_A	220368733	0	59	A	C	0.017	-5.992668	2.539223	0.02191615	0.01610198	0.02252782
1	1_220375728_A_G	220375728	0	59	G	A	0.042	3.913535	1.726981	0.02747549	0.02060656	0.02764532
1	1_220789362_TAA_AAA	220789362	0	59	AAA	TAA	0.814	1.774084	0.7808455	0.02709317	0.02029397	0.02729462
1	1_221876029_G_A	221876029	0	59	A	G	0.102	2.085233	1.06859	0.05620645	0.04495426	0.05381065
1	1_222823742_T_TG	222823742	0	59	TG	T	0.025	-4.41911	2.125377	0.04236131	0.03303696	0.04122552
1	1_223284444_T_A	223284444	0	59	A	T	0.017	6.418539	2.623318	0.01770178	0.01275368	0.0186128
1	1_225156457_G_A	225156457	0	59	A	G	0.068	-2.114935	1.087484	0.05701496	0.0456587	0.05454572
1	1_225268106_C_A	225268106	0	59	A	C	0.017	5.944095	2.566012	0.02435605	0.01806779	0.02477897
1	1_225311160_G_C	225311160	0	59	C	G	0.076	-2.256244	1.044059	0.03514609	0.02695355	0.03465667
1	1_225346975_C_G	225346975	0	59	G	C	0.102	-1.992033	0.996908	0.05073997	0.04021469	0.0488419
1	1_225373072_C_T	225373072	0	59	T	C	0.102	-1.992033	0.996908	0.05073997	0.04021469	0.0488419
1	1_225418903_G_A	225418903	0	59	A	G	0.017	5.944095	2.566012	0.02435605	0.01806779	0.02477897
1	1_225463772_A_G	225463772	0	59	G	A	0.102	-1.992033	0.996908	0.05073997	0.04021469	0.0488419
1	1_225506262_G_A	225506262	0	59	A	G	0.144	-2.02308	0.8951815	0.02787955	0.02093735	0.02801581
1	1_225512402_GT_G	225512402	0	59	G	GT	0.144	-2.02308	0.8951815	0.02787955	0.02093735	0.02801581
1	1_225552650_C_T	225552650	0	59	T	C	0.347	-1.499201	0.7218427	0.04258197	0.03322452	0.0414262
1	1_225567813_C_T	225567813	0	59	T	C	0.127	-2.189261	0.8712132	0.01499255	0.01063792	0.01607093
1	1_225579918_A_T	225579918	0	59	T	A	0.136	-2.341311	0.8534021	0.008232582	0.005525624	0.009573196
1	1_225609763_G_A	225609763	0	59	A	G	0.127	-2.189261	0.8712132	0.01499255	0.01063792	0.01607093
1	1_226034920_A_G	226034920	0	59	G	A	0.017	7.310418	2.488465	0.004853126	0.003100164	0.006155407
1	1_226259212_CAA_C	226259212	0	59	C	CAA	0.017	-5.331133	2.67068	0.05096826	0.04041178	0.04904938
1	1_226924642_C_T	226924642	0	59	T	C	0.22	-1.60601	0.7996862	0.04962396	0.03925233	0.04782764
1	1_227221123_G_A	227221123	0	59	A	G	0.127	2.83786	1.263484	0.02881321	0.0217033	0.02887129
1	1_227239562_G_C	227239562	0	59	C	G	0.127	2.83786	1.263484	0.02881321	0.0217033	0.02887129
1	1_227239702_G_A	227239702	0	59	A	G	0.042	-3.52743	1.671895	0.03952208	0.03063137	0.03864248
1	1_227841981_A_G	227841981	0	59	G	A	0.068	2.463488	1.205383	0.04587015	0.0360292	0.0444158
1	1_228284991_C_T	228284991	0	59	T	C	0.076	-2.899463	1.363812	0.03809191	0.02942527	0.03734057
1	1_228327999_C_T	228327999	0	59	T	C	0.059	-3.379883	1.483079	0.02664753	0.0199301	0.02688563
1	1_228333652_G_A	228333652	0	59	A	G	0.076	-3.57798	1.394963	0.01313166	0.009204261	0.01430905
1	1_228335959_C_T	228335959	0	59	T	C	0.059	-3.379883	1.483079	0.02664753	0.0199301	0.02688563
1	1_228346425_G_C	228346425	0	59	C	G	0.059	-3.379883	1.483079	0.02664753	0.0199301	0.02688563
1	1_228399799_C_T	228399799	0	59	T	C	0.059	-3.379883	1.483079	0.02664753	0.0199301	0.02688563
1	1_228456147_T_C	228456147	0	59	C	T	0.712	-1.429448	0.732191	0.05609668	0.04485868	0.05371085
1	1_229600336_A_C	229600336	0	59	C	A	0.136	1.794989	0.9068945	0.05289363	0.04207699	0.05079929
1	1_230384970_G_A	230384970	0	59	A	G	0.136	2.064766	0.9783787	0.03947206	0.03058912	0.03859695
1	1_230410162_C_T	230410162	0	59	T	C	0.178	1.874525	0.8178588	0.02583079	0.01926463	0.0261355
1	1_230883466_C_T	230883466	0	59	T	C	0.475	1.422377	0.6509594	0.03324395	0.02536709	0.03292161
1	1_232172374_G_A	232172374	0	59	A	G	0.212	-2.400937	0.9488434	0.01434186	0.01013468	0.01545656
1	1_234744586_T_G	234744586	0	59	G	T	0.025	5.505911	2.076485	0.01049452	0.007204673	0.01178156
1	1_235345346_C_T	235345346	0	59	T	C	0.068	-3.252555	1.427856	0.02671332	0.01998379	0.02694602
1	1_235357314_AT_A	235357314	0	59	A	AT	0.305	1.425288	0.7122577	0.05041991	0.03993851	0.04855102
1	1_235357543_A_G	235357543	0	59	G	A	0.297	1.603545	0.7051564	0.02696286	0.02018752	0.02717505
1	1_235383188_A_G	235383188	0	59	G	A	0.483	1.483174	0.7081484	0.04092822	0.03182093	0.03992196
1	1_235394541_A_C	235394541	0	59	C	A	0.466	1.402416	0.6943189	0.04837312	0.0381759	0.04669082
1	1_235506853_G_A	235506853	0	59	A	G	0.305	1.926491	0.849582	0.02738016	0.02052859	0.02755789
1	1_235594182_A_G	235594182	0	59	G	A	0.669	-1.981665	0.6697203	0.004575077	0.002906383	0.005864305
1	1_235600590_G_A	235600590	0	59	A	G	0.034	-3.402256	1.480602	0.02546856	0.01897008	0.02580256
1	1_235600741_A_G	235600741	0	59	G	A	0.034	-3.402256	1.480602	0.02546856	0.01897008	0.02580256
1	1_235600813_A_C	235600813	0	59	C	A	0.034	-3.402256	1.480602	0.02546856	0.01897008	0.02580256
1	1_235613727_A_G	235613727	0	59	G	A	0.034	-3.402256	1.480602	0.02546856	0.01897008	0.02580256
1	1_235993709_G_A	235993709	0	59	A	G	0.025	4.190144	2.142636	0.05569448	0.04450862	0.05334521
1	1_236175339_T_C	236175339	0	59	C	T	0.483	2.057841	0.6722796	0.003433462	0.002122957	0.004644053
1	1_236718524_G_C	236718524	0	59	C	G	0.661	-1.529832	0.687932	0.03036429	0.02298061	0.03029082
1	1_236719259_G_A	236719259	0	59	A	G	0.661	-1.529832	0.687932	0.03036429	0.02298061	0.03029082
1	1_236749649_T_C	236749649	0	59	C	T	0.669	-1.63157	0.6792169	0.01976881	0.01438793	0.02053794
1	1_237048500_A_G	237048500	0	59	G	A	0.186	1.598324	0.8239445	0.05762908	0.04619435	0.0551041
1	1_237540615_A_C	237540615	0	59	C	A	0.246	1.92812	0.7878504	0.01767573	0.01273319	0.01858847
1	1_237617757_C_T	237617757	0	59	T	C	0.568	-1.685228	0.6235443	0.009175425	0.006220952	0.01049932
1	1_237620049_T_C	237620049	0	59	C	T	0.5	-1.613871	0.6407986	0.01477983	0.01047318	0.01587027
1	1_237730059_C_T	237730059	0	59	T	C	0.025	-5.642903	2.085923	0.00911327	0.006174904	0.01043853
1	1_237732693_G_A	237732693	0	59	A	G	0.017	5.342311	2.651255	0.04889332	0.03862328	0.0471636
1	1_237863790_GT_G	237863790	0	59	G	GT	0.068	3.446245	1.336827	0.01270083	0.008874864	0.01389885
1	1_238053511_G_A	238053511	0	59	A	G	0.025	5.254764	2.110949	0.01591252	0.01135279	0.01693682
1	1_240370934_G_C	240370934	0	59	C	G	0.017	5.267511	2.582264	0.04626653	0.0363685	0.04477611
1	1_240370941_TCCTCCGCCCCCTCTACCCGGAGCGGCAATACCC_CCCTCCGCCCCCTCTACCCGGAGCGGCAATACCC	240370941	0	59	CCCTCCGCCCCCTCTACCCGGAGCGGCAATACCC	TCCTCCGCCCCCTCTACCCGGAGCGGCAATACCC	0.025	4.83328	2.105341	0.02560097	0.0190777	0.02592428
1	1_240370952_C_T	240370952	0	59	T	C	0.025	4.83328	2.105341	0.02560097	0.0190777	0.02592428
1	1_240370956_A_T	240370956	0	59	T	A	0.025	4.83328	2.105341	0.02560097	0.0190777	0.02592428
1	1_240370962_A_G	240370962	0	59	G	A	0.025	4.83328	2.105341	0.02560097	0.0190777	0.02592428
1	1_240370964_C_CA	240370964	0	59	CA	C	0.025	4.83328	2.105341	0.02560097	0.0190777	0.02592428
1	1_241663902_T_TGA	241663902	0	59	TGA	T	0.161	2.238051	1.020414	0.03261319	0.02484274	0.03234582
1	1_241886645_G_C	241886645	0	59	C	G	0.025	4.532929	2.14433	0.03915711	0.03032322	0.0383103
1	1_241943271_C_G	241943271	0	59	G	C	0.042	-3.838322	1.733865	0.03109079	0.02358088	0.03095507
1	1_242035263_A_G	242035263	0	59	G	A	0.017	-7.815658	2.574815	0.003691372	0.002298076	0.00492378
1	1_243354809_A_G	243354809	0	59	G	A	0.017	6.213127	2.598965	0.02033677	0.01483974	0.02106515
1	1_243507680_C_CA	243507680	0	59	CA	C	0.288	1.407901	0.6787022	0.0428231	0.03342957	0.04164549
1	1_244587195_A_G	244587195	0	59	G	A	0.017	7.046246	2.514194	0.007025571	0.004646228	0.008373007
1	1_244653781_AT_A	244653781	0	59	A	AT	0.102	-3.443695	0.9897542	0.001002049	0.0005511571	0.001783718
1	1_244803205_CTTT_C	244803205	0	59	C	CTTT	0.119	3.278595	1.109919	0.004639734	0.002951349	0.005932182
1	1_245850506_G_C	245850506	0	59	C	G	0.025	4.40339	2.220522	0.0524584	0.04170011	0.05040371
1	1_246021851_G_A	246021851	0	59	A	G	0.042	-3.920147	1.656053	0.02153874	0.01579959	0.02217873
1	1_246027029_A_T	246027029	0	59	T	A	0.771	-1.974419	0.9449216	0.0413879	0.03221059	0.04034014
1	1_246490452_G_A	246490452	0	59	A	G	0.653	1.632434	0.7475091	0.03333805	0.02544539	0.03300749
1	1_246823662_C_T	246823662	0	59	T	C	0.017	-5.902772	2.628429	0.02883484	0.02172108	0.0288911
1	1_247021138_A_T	247021138	0	59	T	A	0.068	-3.24374	1.213999	0.009948633	0.006796117	0.01125264
1	1_247302002_T_C	247302002	0	59	C	T	0.017	7.478508	2.49627	0.004126288	0.002595939	0.00538983
1	1_247769217_T_G	247769217	0	59	G	T	0.102	2.283579	1.052465	0.0344454	0.02636825	0.03401774
1	1_247886949_T_C	247886949	0	59	C	T	0.085	2.721412	1.098056	0.01635437	0.01169748	0.01735163
1	1_248436912_T_C	248436912	0	59	C	T	0.119	2.193935	1.107585	0.05271352	0.04192099	0.05063558
1	1_248652058_G_A	248652058	0	59	A	G	0.136	-3.31707	1.025839	0.002087619	0.001231418	0.00312849
1	1_248652061_C_T	248652061	0	59	T	C	0.136	-3.31707	1.025839	0.002087619	0.001231418	0.00312849
1	1_248652071_G_C	248652071	0	59	C	G	0.102	-2.333723	1.18661	0.05436404	0.04335222	0.05213579
2	2_242732_T_TAAC	242732	0	59	TAAC	T	0.703	1.467226	0.6741031	0.03390562	0.02591807	0.03352537
2	2_672740_C_A	672740	0	59	A	C	0.017	5.18611	2.624383	0.05325862	0.04239325	0.05113103
2	2_677295_C_T	677295	0	59	T	C	0.093	-2.756919	0.991176	0.007436983	0.004944522	0.00878416
2	2_3358295_T_C	3358295	0	59	C	T	0.093	3.544435	1.140497	0.003004384	0.001834373	0.004172201
2	2_3464135_A_T	3464135	0	59	T	A	0.017	5.853011	2.704316	0.03487996	0.02673113	0.03441403
2	2_3482598_A_T	3482598	0	59	T	A	0.025	-5.030276	2.092144	0.01966045	0.01430186	0.02043727
2	2_3504819_A_G	3504819	0	59	G	A	0.364	1.383638	0.6938971	0.05121104	0.04062146	0.04927003
2	2_3599700_G_T	3599700	0	59	T	G	0.678	1.604935	0.7493531	0.0367408	0.02828945	0.03611001
2	2_3721729_A_G	3721729	0	59	G	A	0.525	1.848929	0.6894855	0.009699239	0.006610138	0.01101021
2	2_3726163_T_C	3726163	0	59	C	T	0.508	1.753299	0.6955517	0.01469757	0.01040953	0.01579262
2	2_3749084_T_C	3749084	0	59	C	T	0.347	2.189886	0.717032	0.003501282	0.002168891	0.004717874
2	2_3749151_GGAA_G	3749151	0	59	G	GGAA	0.407	1.867454	0.6722596	0.007508983	0.004996884	0.008855884
2	2_3749267_G_A	3749267	0	59	A	G	0.347	2.189886	0.717032	0.003501282	0.002168891	0.004717874
2	2_3756073_G_A	3756073	0	59	A	G	0.381	1.968043	0.6848064	0.005787364	0.003758541	0.007120039
2	2_3800383_C_T	3800383	0	59	T	C	0.517	-1.283627	0.6473042	0.05245937	0.04170094	0.05040459
2	2_3800496_C_T	3800496	0	59	T	C	0.517	-1.283627	0.6473042	0.05245937	0.04170094	0.05040459
2	2_8872150_TAAG_T	8872150	0	59	T	TAAG	0.017	5.944095	2.566012	0.02435605	0.01806779	0.02477897
2	2_9607831_C_A	9607831	0	59	A	C	0.025	5.418281	2.110092	0.01303562	0.009130745	0.01421769
2	2_9630541_G_A	9630541	0	59	A	G	0.034	-5.595336	1.768581	0.002557561	0.001537945	0.00367054
2	2_10101128_A_G	10101128	0	59	G	A	0.017	5.160647	2.628268	0.05474412	0.04368234	0.05248129
2	2_10104504_C_T	10104504	0	59	T	C	0.017	5.160647	2.628268	0.05474412	0.04368234	0.05248129
2	2_10220006_C_T	10220006	0	59	T	C	0.042	-4.274568	1.742476	0.01742025	0.01253238	0.01834973
2	2_10220091_G_A	10220091	0	59	A	G	0.051	-3.842757	1.570969	0.01772912	0.01277519	0.01863834
2	2_10220218_C_G	10220218	0	59	G	C	0.025	-6.031611	2.074146	0.005269079	0.003391967	0.00658728
2	2_10223894_T_G	10223894	0	59	G	T	0.068	3.29241	1.385256	0.02103976	0.01540053	0.02171679
2	2_10267211_T_C	10267211	0	59	C	T	0.068	-3.248691	1.348623	0.01944201	0.01412849	0.02023426
2	2_10350599_G_C	10350599	0	59	C	G	0.068	3.096273	1.384444	0.02947276	0.02224571	0.02947514
2	2_10595578_T_C	10595578	0	59	C	T	0.203	1.691219	0.7972499	0.03850169	0.02977045	0.03771367
2	2_11273458_A_AC	11273458	0	59	AC	A	0.051	3.255569	1.377209	0.02171145	0.01593791	0.02233851
2	2_11273757_C_T	11273757	0	59	T	C	0.051	3.255569	1.377209	0.02171145	0.01593791	0.02233851
2	2_11284025_C_T	11284025	0	59	T	C	0.051	3.255569	1.377209	0.02171145	0.01593791	0.02233851
2	2_11312018_C_T	11312018	0	59	T	C	0.025	5.633203	2.632108	0.03687384	0.02840113	0.03623121
2	2_11357151_C_G	11357151	0	59	G	C	0.144	-2.242908	1.060671	0.03909483	0.03027065	0.0382536
2	2_11696806_C_T	11696806	0	59	T	C	0.025	-5.514779	2.089641	0.0108411	0.007465082	0.01211622
2	2_11725241_G_A	11725241	0	59	A	G	0.339	-1.93668	0.7860065	0.01695696	0.0121689	0.01791633
2	2_11733134_C_G	11733134	0	59	G	C	0.025	-5.514779	2.089641	0.0108411	0.007465082	0.01211622
2	2_11905876_C_T	11905876	0	59	T	C	0.314	1.339442	0.6511324	0.0445204	0.03487573	0.04318878
2	2_11907842_C_T	11907842	0	59	T	C	0.178	-1.90498	0.818366	0.02370024	0.01753761	0.02417479
2	2_11911761_C_T	11911761	0	59	T	C	0.136	-2.502461	0.8935961	0.007066415	0.004675772	0.008413929
2	2_14774094_C_T	14774094	0	59	T	C	0.034	-3.678206	1.870357	0.05438005	0.04336612	0.05215034
2	2_15468025_T_C	15468025	0	59	C	T	0.178	-2.019617	0.9269094	0.03372421	0.02576691	0.03335986
2	2_15770293_C_T	15770293	0	59	T	C	0.059	-3.700276	1.42351	0.01201728	0.00835435	0.01324602
2	2_16734284_T_C	16734284	0	59	C	T	0.229	-2.607966	0.8463726	0.00324027	0.001992578	0.004432672
2	2_16743453_A_C	16743453	0	59	C	A	0.458	-1.371251	0.6194776	0.03110364	0.02359151	0.03096681
2	2_16746897_C_G	16746897	0	59	G	C	0.297	-1.653658	0.730832	0.02769884	0.02078935	0.02785013
2	2_18736613_A_G	18736613	0	59	G	A	0.017	5.910275	2.598386	0.02692646	0.02015779	0.02714165
2	2_18765169_C_T	18765169	0	59	T	C	0.042	-3.641512	1.69467	0.03615084	0.02779464	0.03557248
2	2_20133221_C_T	20133221	0	59	T	C	0.093	2.810667	1.206845	0.02363432	0.01748439	0.02411403
2	2_20212468_G_T	20212468	0	59	T	G	0.068	3.023675	1.36117	0.03053833	0.02312429	0.03044998
2	2_20405078_G_A	20405078	0	59	A	G	0.017	-7.020135	2.510345	0.007142251	0.004730668	0.008489848
2	2_20423047_G_GA	20423047	0	59	GA	G	0.059	-3.496646	1.427124	0.01755204	0.01263594	0.01847291
2	2_20699801_C_G	20699801	0	59	G	C	0.051	3.182068	1.582154	0.04930443	0.03897712	0.04753723
2	2_21225354_T_C	21225354	0	59	C	T	0.042	3.917699	1.668636	0.02257608	0.01663184	0.02313763
2	2_23866082_C_T	23866082	0	59	T	C	0.068	-3.207348	1.36983	0.02293082	0.01691724	0.02346513
2	2_23866090_C_CGCA	23866090	0	59	CGCA	C	0.093	-2.080076	1.028595	0.04811601	0.03795494	0.04645714
2	2_24239900_CTGAAGTG_C	24239900	0	59	C	CTGAAGTG	0.068	-3.59374	1.432437	0.01514727	0.01075788	0.01621677
2	2_24244603_G_A	24244603	0	59	A	G	0.076	-3.413482	1.380525	0.01659376	0.01188457	0.01757611
2	2_24256071_T_C	24256071	0	59	C	T	0.136	-2.254871	1.062738	0.03846294	0.02973779	0.03767838
2	2_24307260_A_ACAGGG	24307260	0	59	ACAGGG	A	0.254	-1.690206	0.7518398	0.02867493	0.02158972	0.02874464
2	2_24881666_C_A	24881666	0	59	A	C	0.034	-4.583899	1.873944	0.01772833	0.01277457	0.0186376
2	2_24929851_A_T	24929851	0	59	T	A	0.059	-4.04907	1.522849	0.01029536	0.007055385	0.01158885
2	2_24949602_A_C	24949602	0	59	C	A	0.034	-4.583899	1.873944	0.01772833	0.01277457	0.0186376
2	2_24985719_T_G	24985719	0	59	G	T	0.059	-4.04907	1.522849	0.01029536	0.007055385	0.01158885
2	2_25057298_C_G	25057298	0	59	G	C	0.246	2.041269	0.7841054	0.01189657	0.008262707	0.01313046
2	2_25551450_G_C	25551450	0	59	C	G	0.102	2.779992	1.160096	0.02005234	0.01461333	0.02080121
2	2_25551459_G_C	25551459	0	59	C	G	0.076	2.546247	1.309804	0.05711458	0.04574556	0.0546363
2	2_25642294_T_C	25642294	0	59	C	T	0.11	-3.841657	1.060413	0.0006446832	0.0003399311	0.001287411
2	2_26461733_C_G	26461733	0	59	G	C	0.195	1.800275	0.8973806	0.04986067	0.0394563	0.04804277
2	2_26500101_CTTT_CTT	26500101	0	59	CTT	CTTT	0.136	-2.87075	1.016624	0.006633516	0.004363461	0.007978962
2	2_26695500_A_C	26695500	0	59	C	A	0.025	4.315502	2.158802	0.05064898	0.04013617	0.04875921
2	2_26724725_T_G	26724725	0	59	G	T	0.525	1.584425	0.6702581	0.02171076	0.01593736	0.02233787
2	2_26818021_C_T	26818021	0	59	T	C	0.839	2.290303	0.943204	0.0185349	0.01341041	0.01939002
2	2_27167617_G_A	27167617	0	59	A	G	0.051	3.406156	1.558077	0.03316049	0.02529765	0.03284543
2	2_27359887_C_T	27359887	0	59	T	C	0.508	-1.822389	0.6311015	0.005572912	0.003606477	0.00690027
2	2_27361418_G_T	27361418	0	59	T	G	0.051	3.260384	1.291535	0.01456046	0.01030352	0.01566315
2	2_27597338_C_A	27597338	0	59	A	C	0.051	3.735997	1.522513	0.01739083	0.01250927	0.01832223
2	2_27609212_T_C	27609212	0	59	C	T	0.051	3.735997	1.522513	0.01739083	0.01250927	0.01832223
2	2_27712408_C_T	27712408	0	59	T	C	0.051	3.735997	1.522513	0.01739083	0.01250927	0.01832223
2	2_27720385_C_T	27720385	0	59	T	C	0.051	3.735997	1.522513	0.01739083	0.01250927	0.01832223
2	2_27730817_G_A	27730817	0	59	A	G	0.042	4.813906	1.606998	0.004129572	0.0025982	0.005393325
2	2_28805410_C_A	28805410	0	59	A	C	0.271	-1.997425	0.6681573	0.004201243	0.002647579	0.005469502
2	2_28812285_T_C	28812285	0	59	C	T	0.28	-1.876757	0.6783306	0.00773695	0.005162977	0.009082545
2	2_28812982_C_T	28812982	0	59	T	C	0.297	-1.99101	0.6723534	0.004545703	0.002885974	0.005833431
2	2_28814033_A_G	28814033	0	59	G	A	0.161	-1.997941	1.016523	0.05451227	0.04348095	0.05227054
2	2_28814548_A_T	28814548	0	59	T	A	0.153	-1.999794	1.016382	0.05426363	0.04326505	0.05204453
2	2_29152376_A_T	29152376	0	59	T	A	0.119	2.231774	1.096468	0.04672839	0.03676417	0.04519592
2	2_29256374_C_T	29256374	0	59	T	C	0.085	2.774645	1.262643	0.03229455	0.02457819	0.03205485
2	2_29268295_A_C	29268295	0	59	C	A	0.119	-2.327675	1.089868	0.03725192	0.0287187	0.0365756
2	2_29432776_T_C	29432776	0	59	C	T	0.034	-3.921951	1.845875	0.03820421	0.02951983	0.03744282
2	2_29754721_T_C	29754721	0	59	C	T	0.246	1.659347	0.7496051	0.03109869	0.02358742	0.03096229
2	2_31621598_T_C	31621598	0	59	C	T	0.119	-2.173838	1.010124	0.03588159	0.02756905	0.03532711
2	2_32248479_C_CCATT	32248479	0	59	CCATT	C	0.127	-2.116925	0.9814647	0.03548251	0.02723495	0.03496337
2	2_32372399_ATG_A	32372399	0	59	A	ATG	0.017	-6.724528	2.616643	0.01296516	0.00907684	0.01415063
2	2_32396320_T_C	32396320	0	59	C	T	0.017	5.963674	2.562693	0.02373885	0.01756879	0.02421038
2	2_32582241_T_C	32582241	0	59	C	T	0.034	3.77132	1.866146	0.04825863	0.03807749	0.04658676
2	2_32656153_C_T	32656153	0	59	T	C	0.034	3.77132	1.866146	0.04825863	0.03807749	0.04658676
2	2_32656210_C_T	32656210	0	59	T	C	0.034	3.77132	1.866146	0.04825863	0.03807749	0.04658676
2	2_32689842_C_T	32689842	0	59	T	C	0.034	3.77132	1.866146	0.04825863	0.03807749	0.04658676
2	2_32702561_G_A	32702561	0	59	A	G	0.034	3.77132	1.866146	0.04825863	0.03807749	0.04658676
2	2_32725224_TG_T	32725224	0	59	T	TG	0.034	3.77132	1.866146	0.04825863	0.03807749	0.04658676
2	2_32725226_G_T	32725226	0	59	T	G	0.017	-5.878076	2.567052	0.0259656	0.01937435	0.02625937
2	2_32735633_C_G	32735633	0	59	G	C	0.017	-5.878076	2.567052	0.0259656	0.01937435	0.02625937
2	2_32743503_G_A	32743503	0	59	A	G	0.017	-5.878076	2.567052	0.0259656	0.01937435	0.02625937
2	2_32773118_C_CT	32773118	0	59	CT	C	0.017	-5.878076	2.567052	0.0259656	0.01937435	0.02625937
2	2_32774554_T_G	32774554	0	59	G	T	0.017	-5.878076	2.567052	0.0259656	0.01937435	0.02625937
2	2_37000881_T_A	37000881	0	59	A	T	0.093	3.046154	1.219612	0.01558118	0.01109488	0.01662531
2	2_37230734_C_T	37230734	0	59	T	C	0.169	2.200536	0.8537498	0.01271501	0.008885696	0.01391237
2	2_37267709_G_GTACTGAATTGAGTA	37267709	0	59	GTACTGAATTGAGTA	G	0.017	6.430579	2.564772	0.015207	0.01080422	0.01627306
2	2_37280571_T_A	37280571	0	59	A	T	0.153	1.769598	0.8871424	0.05113151	0.04055277	0.04919775
2	2_37438274_T_C	37438274	0	59	C	T	0.102	-2.277116	1.078534	0.03939019	0.03051999	0.03852244
2	2_37458811_CA_C	37458811	0	59	C	CA	0.017	5.855472	2.567479	0.02654174	0.0198438	0.02678851
2	2_37458813_G_C	37458813	0	59	C	G	0.017	5.855472	2.567479	0.02654174	0.0198438	0.02678851
2	2_37481335_AT_A	37481335	0	59	A	AT	0.017	5.910275	2.598386	0.02692646	0.02015779	0.02714165
2	2_37516543_G_A	37516543	0	59	A	G	0.017	-5.344454	2.563081	0.04179574	0.03255662	0.04071112
2	2_38178362_T_C	38178362	0	59	C	T	0.22	-2.145061	0.7783575	0.007964901	0.005329509	0.009308558
2	2_38178406_A_G	38178406	0	59	G	A	0.483	1.521512	0.6829537	0.03007809	0.02274448	0.03002904
2	2_38179414_CTG_C	38179414	0	59	C	CTG	0.475	1.283569	0.6613705	0.05751365	0.04609364	0.05499915
2	2_38202502_A_G	38202502	0	59	G	A	0.212	-2.249985	0.8307495	0.009037688	0.006118947	0.01036457
2	2_38244417_G_T	38244417	0	59	T	G	0.042	-3.433515	1.667868	0.04436814	0.03474581	0.04305035
2	2_38298139_T_C	38298139	0	59	C	T	0.161	-1.951661	0.9423793	0.04315289	0.03371018	0.04194539
2	2_39008949_G_A	39008949	0	59	A	G	0.034	4.562445	1.816562	0.01504214	0.01067636	0.01611769
2	2_39563988_T_C	39563988	0	59	C	T	0.017	5.944095	2.566012	0.02435605	0.01806779	0.02477897
2	2_39996787_A_G	39996787	0	59	G	A	0.025	-5.054644	2.116535	0.02045928	0.01493735	0.02117879
2	2_42280335_A_C	42280335	0	59	C	A	0.068	3.278597	1.382785	0.02133729	0.01563838	0.02199229
2	2_42396722_A_G	42396722	0	59	G	A	0.627	-2.22523	0.8158269	0.008589095	0.00578773	0.009924441
2	2_42488198_A_G	42488198	0	59	G	A	0.398	1.612778	0.7928369	0.04685699	0.0368744	0.04531281
2	2_44079606_G_A	44079606	0	59	A	G	0.068	-3.045624	1.353323	0.02851352	0.0214572	0.02859678
2	2_44079671_C_T	44079671	0	59	T	C	0.068	-3.045624	1.353323	0.02851352	0.0214572	0.02859678
2	2_44100871_G_A	44100871	0	59	A	G	0.093	-3.110825	1.264121	0.01708841	0.01227194	0.01803937
2	2_44101538_C_T	44101538	0	59	T	C	0.525	1.478539	0.6749203	0.03281067	0.02500681	0.03252611
2	2_45236286_T_C	45236286	0	59	C	T	0.059	-3.072959	1.51548	0.04753606	0.03745689	0.04593003
2	2_46808243_GGA_G	46808243	0	59	G	GGA	0.415	-1.643468	0.7628382	0.03568688	0.027406	0.03514965
2	2_46839477_T_C	46839477	0	59	C	T	0.407	-1.437929	0.7399732	0.05721015	0.0458289	0.05472319
2	2_47045267_G_A	47045267	0	59	A	G	0.602	-1.51641	0.75965	0.05096554	0.04040943	0.0490469
2	2_47045309_C_T	47045309	0	59	T	C	0.432	-2.020417	0.6579398	0.003338816	0.002058995	0.004540704
2	2_47045321_A_G	47045321	0	59	G	A	0.331	-1.333237	0.6675435	0.05084975	0.04030946	0.04894167
2	2_47317357_C_A	47317357	0	59	A	C	0.017	5.781143	2.573248	0.02877419	0.02167125	0.02883555
2	2_47641559_TAAAAA_TAAA	47641559	0	59	TAAA	TAAAAA	0.153	-1.790697	0.8405076	0.03770224	0.02909732	0.03698573
2	2_48010488_G_A	48010488	0	59	A	G	0.195	-1.745073	0.8425164	0.0431267	0.03368789	0.04192157
2	2_48025694_C_T	48025694	0	59	T	C	0.059	3.027533	1.437212	0.03982036	0.0308834	0.03891393
2	2_48040253_A_G	48040253	0	59	G	A	0.017	6.430579	2.564772	0.015207	0.01080422	0.01627306
2	2_48688258_ATT_ATTT	48688258	0	59	ATTT	ATT	0.059	3.028982	1.455114	0.0421327	0.03284273	0.0410176
2	2_48822381_G_A	48822381	0	59	A	G	0.619	-1.77145	0.6910481	0.01318239	0.009243106	0.01435728
2	2_48925746_C_T	48925746	0	59	T	C	0.822	-3.109436	0.7838054	0.0002160043	0.0001025137	0.0005943423
2	2_48948802_T_C	48948802	0	59	C	T	0.127	-2.317632	0.9966072	0.02383016	0.01764254	0.02429453
2	2_48948856_A_G	48948856	0	59	G	A	0.127	-2.317632	0.9966072	0.02383016	0.01764254	0.02429453
2	2_49381585_C_T	49381585	0	59	T	C	0.195	1.902844	0.8410627	0.02771705	0.02080427	0.02786683
2	2_50574038_C_A	50574038	0	59	A	C	0.102	2.089124	1.016466	0.04470173	0.03503052	0.04335363
2	2_54562012_C_A	54562012	0	59	A	C	0.347	1.426809	0.7192819	0.05238789	0.04163908	0.05033963
2	2_54587659_G_C	54587659	0	59	C	G	0.237	-1.70534	0.8455999	0.04870873	0.03846448	0.04699584
2	2_55555593_T_C	55555593	0	59	C	T	0.017	-8.092446	3.690059	0.03263131	0.02485779	0.03236236
2	2_55559874_T_TA	55559874	0	59	TA	T	0.017	5.781143	2.573248	0.02877419	0.02167125	0.02883555
2	2_55573533_C_T	55573533	0	59	T	C	0.025	-5.930161	2.637496	0.02865374	0.02157232	0.02872523
2	2_55576585_A_C	55576585	0	59	C	A	0.017	-5.902772	2.628429	0.02883484	0.02172108	0.0288911
2	2_55760940_G_T	55760940	0	59	T	G	0.831	2.072852	0.8588269	0.01921824	0.01395107	0.02002618
2	2_55762957_C_T	55762957	0	59	T	C	0.508	1.621835	0.7001711	0.02436374	0.01807401	0.02478605
2	2_55844445_T_C	55844445	0	59	C	T	0.5	1.297969	0.6655668	0.05635495	0.04508358	0.05394566
2	2_55863360_TA_TAA	55863360	0	59	TAA	TA	0.475	1.77447	0.7601389	0.02332403	0.01723405	0.02382791
2	2_55894247_T_C	55894247	0	59	C	T	0.483	1.480986	0.659056	0.02874023	0.02164335	0.02880445
2	2_55900283_A_G	55900283	0	59	G	A	0.475	1.594374	0.6447187	0.01657801	0.01187225	0.01756134
2	2_55912120_T_C	55912120	0	59	C	T	0.483	1.480986	0.659056	0.02874023	0.02164335	0.02880445
2	2_56216052_G_A	56216052	0	59	A	G	0.924	3.467216	1.271153	0.00858823	0.005787092	0.00992359
2	2_56420006_A_T	56420006	0	59	T	A	0.059	3.297029	1.443813	0.02635692	0.0196931	0.0266188
2	2_56420296_C_T	56420296	0	59	T	C	0.059	3.297029	1.443813	0.02635692	0.0196931	0.0266188
2	2_61108926_C_G	61108926	0	59	G	C	0.025	4.354511	2.11805	0.04463934	0.03497726	0.04329691
2	2_62066927_A_G	62066927	0	59	G	A	0.975	5.153676	2.078119	0.01628963	0.01164691	0.01729089
2	2_62081012_A_C	62081012	0	59	C	A	0.975	5.153676	2.078119	0.01628963	0.01164691	0.01729089
2	2_62081217_A_G	62081217	0	59	G	A	0.975	5.153676	2.078119	0.01628963	0.01164691	0.01729089
2	2_62107376_T_TC	62107376	0	59	TC	T	0.975	5.153676	2.078119	0.01628963	0.01164691	0.01729089
2	2_63169975_G_A	63169975	0	59	A	G	0.051	-3.529168	1.520482	0.02408671	0.01784989	0.02453091
2	2_63486429_C_T	63486429	0	59	T	C	0.466	-1.946675	0.6947161	0.007034504	0.004652688	0.008381959
2	2_64069277_GA_G	64069277	0	59	G	GA	0.203	-2.054307	0.9579518	0.03651215	0.02809759	0.0359017
2	2_64114553_G_A	64114553	0	59	A	G	0.017	-5.878063	2.65171	0.03087507	0.02340251	0.03075787
2	2_64139831_TA_TAA	64139831	0	59	TAA	TA	0.034	4.587167	1.899609	0.01916086	0.0139056	0.0199728
2	2_64144020_A_T	64144020	0	59	T	A	0.017	-5.878063	2.65171	0.03087507	0.02340251	0.03075787
2	2_64144021_A_C	64144021	0	59	C	A	0.017	-5.878063	2.65171	0.03087507	0.02340251	0.03075787
2	2_64778662_T_C	64778662	0	59	C	T	0.025	5.540723	2.104066	0.01100504	0.007588526	0.01227423
2	2_68364478_T_C	68364478	0	59	C	T	0.237	-2.019357	0.8150448	0.01638677	0.01172278	0.01738202
2	2_68385097_A_G	68385097	0	59	G	A	0.602	-1.691039	0.7107434	0.02091131	0.01529793	0.02159779
2	2_68392160_C_CATT	68392160	0	59	CATT	C	0.246	-1.782709	0.8239673	0.03494083	0.02678199	0.03446953
2	2_68444168_A_G	68444168	0	59	G	A	0.195	-1.848791	0.802419	0.02509645	0.01866789	0.02546037
2	2_69420446_G_C	69420446	0	59	C	G	0.034	5.002517	1.802591	0.007563549	0.005036598	0.008910196
2	2_69556982_T_C	69556982	0	59	C	T	0.017	-5.325851	2.653134	0.04972474	0.03933916	0.04791923
2	2_70098858_AT_A	70098858	0	59	A	AT	0.017	-5.730764	2.596084	0.03155072	0.02396154	0.03137539
2	2_70187727_A_C	70187727	0	59	C	A	0.102	-3.015868	1.070011	0.006728893	0.004432113	0.008075035
2	2_70191360_C_T	70191360	0	59	T	C	0.042	-6.279961	1.871542	0.001455532	0.0008296222	0.002366518
2	2_70392379_G_A	70392379	0	59	A	G	0.042	-5.913972	1.892603	0.002861543	0.001739129	0.004013081
2	2_70392820_G_C	70392820	0	59	C	G	0.042	-5.865506	1.718337	0.001223205	0.0006857363	0.002072901
2	2_70406718_C_A	70406718	0	59	A	C	0.025	-4.554735	2.220499	0.04510969	0.03537896	0.04372451
2	2_70524396_C_T	70524396	0	59	T	C	0.169	-2.277595	0.9801573	0.02393505	0.01772729	0.02439118
2	2_70524577_G_A	70524577	0	59	A	G	0.254	-1.724169	0.7687185	0.02902822	0.02188001	0.02906819
2	2_70524606_G_A	70524606	0	59	A	G	0.085	-2.836258	1.346519	0.0398357	0.03089637	0.03892789
2	2_71192257_C_A	71192257	0	59	A	C	0.025	4.893257	2.118447	0.02474847	0.01838565	0.02514021
2	2_71211883_G_T	71211883	0	59	T	G	0.034	3.581636	1.468347	0.018035	0.01301603	0.01892389
2	2_71211989_A_G	71211989	0	59	G	A	0.653	1.766853	0.8515843	0.04278628	0.03339825	0.041612
2	2_71212336_T_C	71212336	0	59	C	T	0.017	6.325709	2.549831	0.01625437	0.01161939	0.0172578
2	2_71215869_T_TGA	71215869	0	59	TGA	T	0.034	3.581636	1.468347	0.018035	0.01301603	0.01892389
2	2_71220805_C_G	71220805	0	59	G	C	0.034	3.581636	1.468347	0.018035	0.01301603	0.01892389
2	2_71297982_C_T	71297982	0	59	T	C	0.288	-1.48619	0.643598	0.02478674	0.01841667	0.02517543
2	2_71351487_G_A	71351487	0	59	A	G	0.364	1.496199	0.6514387	0.02553743	0.01902605	0.02586587
2	2_71747235_A_G	71747235	0	59	G	A	0.78	-2.221267	0.8056339	0.007937574	0.005309521	0.009281495
2	2_71747851_T_C	71747851	0	59	C	T	0.78	-2.221267	0.8056339	0.007937574	0.005309521	0.009281495
2	2_71755380_A_G	71755380	0	59	G	A	0.788	-1.812473	0.8267927	0.03269728	0.02491259	0.03242259
2	2_71762232_C_T	71762232	0	59	T	C	0.636	-1.703259	0.776896	0.03268077	0.02489887	0.03240751
2	2_71780895_T_C	71780895	0	59	C	T	0.017	6.325709	2.549831	0.01625437	0.01161939	0.0172578
2	2_74184420_C_T	74184420	0	59	T	C	0.017	7.135831	2.484651	0.005817607	0.003780028	0.007150959
2	2_74649922_A_C	74649922	0	59	C	A	0.076	2.974338	1.374509	0.03491179	0.02675772	0.03444305
2	2_74720002_C_G	74720002	0	59	G	C	0.983	-6.1317	2.562035	0.02020346	0.01473359	0.02094147
2	2_74725144_T_C	74725144	0	59	C	T	0.949	-3.460694	1.580059	0.03284552	0.02503577	0.03255793
2	2_74745790_T_G	74745790	0	59	G	T	0.076	2.589507	1.232361	0.04030037	0.03128934	0.03935072
2	2_74763247_C_T	74763247	0	59	T	C	0.017	5.032953	2.585781	0.05681792	0.04548695	0.05436657
2	2_74787210_T_C	74787210	0	59	C	T	0.017	6.1317	2.562035	0.02020346	0.01473359	0.02094147
2	2_76975788_A_C	76975788	0	59	C	A	0.11	-2.953194	1.111445	0.01034404	0.007091856	0.01163598
2	2_79386560_G_A	79386560	0	59	A	G	0.017	6.159651	2.653619	0.02407852	0.01784327	0.02452337
2	2_84668155_T_C	84668155	0	59	C	T	0.059	2.919403	1.438854	0.04740272	0.03734246	0.04580884
2	2_84676914_C_T	84676914	0	59	T	C	0.025	-4.278726	2.188914	0.05580062	0.04460098	0.0534417
2	2_84752630_A_C	84752630	0	59	C	A	0.025	-4.278726	2.188914	0.05580062	0.04460098	0.0534417
2	2_84755956_T_A	84755956	0	59	A	T	0.025	-4.278726	2.188914	0.05580062	0.04460098	0.0534417
2	2_84804548_A_G	84804548	0	59	G	A	0.025	-4.278726	2.188914	0.05580062	0.04460098	0.0534417
2	2_84806861_A_G	84806861	0	59	G	A	0.025	-4.278726	2.188914	0.05580062	0.04460098	0.0534417
2	2_84912420_CT_CTT	84912420	0	59	CTT	CT	0.042	3.716084	1.678428	0.0310697	0.02356343	0.03093578
2	2_84924985_G_A	84924985	0	59	A	G	0.025	-4.278726	2.188914	0.05580062	0.04460098	0.0534417
2	2_85133216_G_A	85133216	0	59	A	G	0.051	3.91563	1.511123	0.01227415	0.008549648	0.01349165
2	2_85554433_C_T	85554433	0	59	T	C	0.042	3.634513	1.7686	0.04472762	0.03505263	0.04337717
2	2_85579054_AAAG_A	85579054	0	59	A	AAAG	0.034	-3.821787	1.890934	0.04823746	0.0380593	0.04656751
2	2_85662636_C_T	85662636	0	59	T	C	0.093	-2.560878	1.230203	0.04212696	0.03283786	0.04101238
2	2_85921992_T_C	85921992	0	59	C	T	0.576	-1.692395	0.7123392	0.02108743	0.01543862	0.02176094
2	2_85924729_C_T	85924729	0	59	T	C	0.415	-1.619603	0.7262364	0.02991642	0.02261118	0.02988114
2	2_85925667_G_A	85925667	0	59	A	G	0.415	-1.619603	0.7262364	0.02991642	0.02261118	0.02988114
2	2_85925680_T_G	85925680	0	59	G	T	0.424	-1.619178	0.7264209	0.02999755	0.02267807	0.02995536
2	2_85925756_C_G	85925756	0	59	G	C	0.424	-1.619178	0.7264209	0.02999755	0.02267807	0.02995536
2	2_86737408_T_A	86737408	0	59	A	T	0.017	-6.19592	2.694671	0.02538099	0.01889893	0.02572204
2	2_86737412_T_A	86737412	0	59	A	T	0.017	-6.19592	2.694671	0.02538099	0.01889893	0.02572204
2	2_86947783_C_T	86947783	0	59	T	C	0.797	-2.244144	0.7450229	0.003941473	0.002468988	0.005192595
2	2_86998659_CTT_C	86998659	0	59	C	CTT	0.127	-2.992037	1.070373	0.007164641	0.004746886	0.008512248
2	2_87015633_T_TGA	87015633	0	59	TGA	T	0.788	-2.67855	0.7159322	0.0004447994	0.0002263218	0.0009848456
2	2_87049397_A_T	87049397	0	59	T	A	0.017	7.478508	2.49627	0.004126288	0.002595939	0.00538983
2	2_88410102_C_G	88410102	0	59	G	C	0.678	-1.461941	0.7128422	0.04514601	0.03541	0.04375753
2	2_88474753_T_C	88474753	0	59	C	T	0.017	-5.874691	2.61302	0.02866509	0.02158164	0.02873563
2	2_88482258_G_A	88482258	0	59	A	G	0.161	2.044762	0.9248713	0.03130096	0.02375476	0.03114715
2	2_96521336_T_C	96521336	0	59	C	T	0.373	2.763808	1.087454	0.01394041	0.009825213	0.01507663
2	2_97007780_C_G	97007780	0	59	G	C	0.017	-5.570462	2.579335	0.03525833	0.02704741	0.03475901
2	2_97267293_T_C	97267293	0	59	C	T	0.263	-1.530833	0.7313768	0.04105415	0.03192764	0.04003653
2	2_97313450_C_G	97313450	0	59	G	C	0.254	-1.560278	0.7617573	0.04540924	0.03563498	0.04399682
2	2_97368670_G_A	97368670	0	59	A	G	0.042	2.942542	1.408431	0.0414134	0.03223222	0.04036334
2	2_97915941_A_C	97915941	0	59	C	A	0.076	3.690814	1.283669	0.005766172	0.003743491	0.007098362
2	2_98123468_T_G	98123468	0	59	G	T	0.034	4.332237	1.846303	0.02265329	0.01669392	0.02320893
2	2_98129761_T_C	98129761	0	59	C	T	0.034	4.691122	1.826138	0.01299949	0.009103104	0.01418331
2	2_98129879_A_T	98129879	0	59	T	A	0.059	3.291287	1.436795	0.02590981	0.01932893	0.0262081
2	2_98341120_A_G	98341120	0	59	G	A	0.034	4.691122	1.826138	0.01299949	0.009103104	0.01418331
2	2_98872570_CT_C	98872570	0	59	C	CT	0.11	-3.228431	1.108977	0.005223027	0.003359552	0.006539664
2	2_99272057_T_C	99272057	0	59	C	T	0.415	-1.29708	0.6545129	0.0526073	0.04182901	0.05053904
2	2_100288931_G_A	100288931	0	59	A	G	0.424	-1.386338	0.701169	0.05313589	0.04228689	0.05101948
2	2_100938205_G_A	100938205	0	59	A	G	0.093	2.422011	1.073472	0.02812694	0.02114009	0.02824257
2	2_101010082_G_C	101010082	0	59	C	G	0.466	-1.539025	0.6870341	0.02922164	0.02203907	0.02924528
2	2_101581294_CT_C	101581294	0	59	C	CT	0.076	-2.66621	1.307667	0.04636713	0.03645465	0.04486755
2	2_101609827_C_T	101609827	0	59	T	C	0.373	1.514603	0.6859684	0.0315129	0.02393021	0.03134082
2	2_101644855_G_A	101644855	0	59	A	G	0.347	1.427779	0.7295345	0.05551235	0.04435018	0.05317964
2	2_102003633_G_T	102003633	0	59	T	G	0.085	-2.96174	1.112973	0.01023548	0.007010555	0.01153085
2	2_102018908_A_G	102018908	0	59	G	A	0.585	2.121364	0.6079768	0.0009723666	0.0005332957	0.001744031
2	2_102781649_C_G	102781649	0	59	G	C	0.085	-2.536407	1.270643	0.05096946	0.04041282	0.04905048
2	2_103095531_T_C	103095531	0	59	C	T	0.059	2.809853	1.238687	0.02732571	0.02048405	0.02750794
2	2_107040572_T_C	107040572	0	59	C	T	0.042	-2.665111	1.230937	0.03481672	0.0266783	0.03435637
2	2_107049392_T_A	107049392	0	59	A	T	0.331	2.199136	0.9960912	0.03152848	0.02394312	0.03135507
2	2_107074172_A_G	107074172	0	59	G	A	0.271	2.674208	0.9194751	0.005263121	0.003387771	0.006581122
2	2_108471148_T_C	108471148	0	59	C	T	0.017	5.032953	2.585781	0.05681792	0.04548695	0.05436657
2	2_108477849_G_C	108477849	0	59	C	G	0.017	-5.874691	2.61302	0.02866509	0.02158164	0.02873563
2	2_108479165_G_C	108479165	0	59	C	G	0.136	2.522436	0.9452791	0.01004019	0.006864501	0.01134151
2	2_108479487_A_T	108479487	0	59	T	A	0.686	1.338061	0.661681	0.04811962	0.03795804	0.04646041
2	2_108486470_C_T	108486470	0	59	T	C	0.347	2.558508	0.7070109	0.0006527922	0.0003446198	0.001299212
2	2_108487097_G_A	108487097	0	59	A	G	0.695	1.357589	0.6883477	0.05371228	0.04278661	0.05154337
2	2_108872012_C_T	108872012	0	59	T	C	0.025	5.200475	2.076501	0.01531611	0.01088891	0.01637582
2	2_109380406_A_C	109380406	0	59	C	A	0.017	7.135831	2.484651	0.005817607	0.003780028	0.007150959
2	2_110036063_G_A	110036063	0	59	A	G	0.017	-5.874691	2.61302	0.02866509	0.02158164	0.02873563
2	2_110332142_C_T	110332142	0	59	T	C	0.042	3.719992	1.859449	0.05047506	0.03998609	0.04860114
2	2_110919321_C_T	110919321	0	59	T	C	0.347	-1.711728	0.7912889	0.03496927	0.02680576	0.03449546
2	2_110922064_CA_C	110922064	0	59	C	CA	0.068	2.977366	1.355458	0.0323635	0.02463542	0.03211782
2	2_110922703_C_T	110922703	0	59	T	C	0.347	-1.711728	0.7912889	0.03496927	0.02680576	0.03449546
2	2_111921649_C_T	111921649	1	58	T	C	0.026	-4.562549	2.134914	0.03713498	0.02862045	0.03646909
2	2_112526866_G_A	112526866	0	59	A	G	0.203	-1.6334	0.7970058	0.04529173	0.03553453	0.04389
2	2_112552427_C_T	112552427	0	59	T	C	0.195	-1.680525	0.845529	0.05194348	0.04125456	0.04993571
2	2_112560090_G_A	112560090	0	59	A	G	0.203	-1.6279	0.7959589	0.04572019	0.03590091	0.04427949
2	2_112578794_T_C	112578794	0	59	C	T	0.203	-1.673896	0.7986514	0.04079279	0.03170621	0.03979876
2	2_112582766_CTT_C	112582766	0	59	C	CTT	0.229	-1.608418	0.7902952	0.04675023	0.03678288	0.04521577
2	2_112583476_C_T	112583476	0	59	T	C	0.203	-1.673896	0.7986514	0.04079279	0.03170621	0.03979876
2	2_112589080_G_A	112589080	0	59	A	G	0.195	-1.721468	0.8465071	0.04691674	0.03692562	0.04536712
2	2_112604685_T_C	112604685	0	59	C	T	0.203	-1.673896	0.7986514	0.04079279	0.03170621	0.03979876
2	2_112619981_G_A	112619981	0	59	A	G	0.068	3.162515	1.341283	0.02203454	0.01619693	0.02263727
2	2_112621199_T_C	112621199	0	59	C	T	0.203	-1.673896	0.7986514	0.04079279	0.03170621	0.03979876
2	2_112776913_T_TC	112776913	0	59	TC	T	0.195	-1.931688	0.8923005	0.03483819	0.02669623	0.03437594
2	2_112843565_AT_A	112843565	0	59	A	AT	0.025	5.053967	2.08911	0.01895352	0.01374142	0.01977987
2	2_112939548_T_C	112939548	0	59	C	T	0.085	5.071794	1.087074	2.068566e-05	7.816264e-06	0.0001322861
2	2_112940578_C_T	112940578	0	59	T	C	0.085	5.071794	1.087074	2.068566e-05	7.816264e-06	0.0001322861
2	2_112995893_C_T	112995893	0	59	T	C	0.017	6.514181	2.536791	0.01303264	0.009128464	0.01421485
2	2_113190893_GGGCCGGGTCGAGGCCGCCGCCGCCC_G	113190893	0	59	G	GGGCCGGGTCGAGGCCGCCGCCGCCC	0.051	4.548629	1.489294	0.003500078	0.002168075	0.004716565
2	2_113520129_G_A	113520129	0	59	A	G	0.076	3.57077	1.289719	0.00769741	0.005134136	0.009043277
2	2_113590467_C_T	113590467	0	59	T	C	0.364	1.741189	0.7551462	0.02499166	0.01858286	0.02536398
2	2_113763676_C_T	113763676	0	59	T	C	0.017	5.0824	2.613999	0.05707625	0.04571214	0.05460144
2	2_113953657_A_C	113953657	0	59	C	A	0.449	-1.486343	0.6574432	0.0278249	0.02089258	0.0279657
2	2_113953952_T_C	113953952	0	59	C	T	0.449	-1.486343	0.6574432	0.0278249	0.02089258	0.0279657
2	2_113955074_G_A	113955074	0	59	A	G	0.449	-1.486343	0.6574432	0.0278249	0.02089258	0.0279657
2	2_113956371_G_C	113956371	0	59	C	G	0.449	-1.486343	0.6574432	0.0278249	0.02089258	0.0279657
2	2_113956821_C_G	113956821	0	59	G	C	0.449	-1.486343	0.6574432	0.0278249	0.02089258	0.0279657
2	2_114257555_T_C	114257555	0	59	C	T	0.034	2.819752	1.318561	0.03701624	0.02852071	0.03636093
2	2_114480812_A_AAAC	114480812	0	59	AAAC	A	0.627	1.820619	0.6202024	0.004882819	0.00312092	0.006186376
2	2_114493509_CT_C	114493509	0	59	C	CT	0.127	3.45795	1.035849	0.001532242	0.0008776279	0.002461588
2	2_114513901_C_T	114513901	0	59	T	C	0.144	3.090478	1.011009	0.003474304	0.002150609	0.004688532
2	2_114691822_G_T	114691822	0	59	T	G	0.051	3.139377	1.538486	0.04619617	0.03630825	0.04471215
2	2_115219661_A_G	115219661	0	59	G	A	0.042	-3.639118	1.856582	0.05515059	0.04403559	0.05285078
2	2_115219702_T_G	115219702	0	59	G	T	0.042	-3.639118	1.856582	0.05515059	0.04403559	0.05285078
2	2_116593695_GATAT_G	116593695	0	59	G	GATAT	0.076	-2.715817	1.33258	0.04645926	0.03653357	0.0449513
2	2_120005840_TCC_TCCC	120005840	0	59	TCCC	TCC	0.093	2.831897	1.18301	0.02017801	0.01471333	0.02091785
2	2_120069281_TA_T	120069281	0	59	T	TA	0.22	-2.759217	0.9246733	0.004265999	0.002692261	0.00553819
2	2_120078689_T_C	120078689	0	59	C	T	0.195	2.021792	0.9155333	0.03148753	0.02390921	0.03131764
2	2_120439282_C_T	120439282	0	59	T	C	0.025	-5.982815	2.076669	0.005675814	0.003679377	0.007005838
2	2_120980428_G_C	120980428	0	59	C	G	0.695	-1.595858	0.8111405	0.05427995	0.04327921	0.05205936
2	2_121740493_G_A	121740493	0	59	A	G	0.017	-5.213045	2.616142	0.05136479	0.0407543	0.04940976
2	2_121742307_C_T	121742307	0	59	T	C	0.017	5.725218	2.649489	0.03515874	0.02696413	0.03466821
2	2_121744225_A_G	121744225	0	59	G	A	0.72	1.618465	0.7186112	0.02839678	0.0213614	0.02848983
2	2_121746956_G_T	121746956	0	59	T	G	0.712	1.569902	0.7252898	0.03486423	0.02671799	0.03439969
2	2_121747406_G_A	121747406	0	59	A	G	0.72	1.543246	0.7223695	0.03719849	0.0286738	0.03652693
2	2_121747429_A_G	121747429	0	59	G	A	0.72	1.618465	0.7186112	0.02839678	0.0213614	0.02848983
2	2_121995151_T_C	121995151	0	59	C	T	0.076	3.054759	1.355492	0.02830247	0.02128403	0.02840342
2	2_125504906_C_T	125504906	0	59	T	C	0.017	6.576565	2.510322	0.01139892	0.007885789	0.01265314
2	2_127807941_C_T	127807941	0	59	T	C	0.254	1.319678	0.6777142	0.05671294	0.04539545	0.05427112
2	2_127808161_G_A	127808161	0	59	A	G	0.263	1.318401	0.67715	0.05674539	0.04542373	0.05430063
2	2_127808170_G_A	127808170	0	59	A	G	0.254	1.319678	0.6777142	0.05671294	0.04539545	0.05427112
2	2_127816743_G_T	127816743	0	59	T	G	0.271	1.34528	0.6535757	0.04439668	0.03477016	0.0430763
2	2_127826632_A_G	127826632	0	59	G	A	0.415	1.573156	0.6802652	0.02458639	0.01825431	0.02499103
2	2_128384744_G_A	128384744	0	59	A	G	0.017	-5.048938	2.601462	0.05750913	0.04608969	0.05499503
2	2_128390758_G_A	128390758	0	59	A	G	0.051	3.471886	1.615844	0.03616346	0.02780522	0.03558398
2	2_128391902_G_A	128391902	0	59	A	G	0.025	5.234131	2.093606	0.01548665	0.01102138	0.01653636
2	2_128392688_C_T	128392688	0	59	T	C	0.085	3.037188	1.089368	0.007306808	0.004849971	0.008654314
2	2_128400433_G_A	128400433	0	59	A	G	0.017	-5.048938	2.601462	0.05750913	0.04608969	0.05499503
2	2_128459039_A_G	128459039	0	59	G	A	0.212	1.960048	0.8322041	0.02217331	0.01630829	0.02276554
2	2_128459214_C_G	128459214	0	59	G	C	0.22	1.60046	0.7988896	0.0501683	0.03972149	0.04832235
2	2_128528436_C_T	128528436	0	59	T	C	0.017	6.295492	2.541448	0.01640632	0.01173806	0.01740036
2	2_128608184_C_T	128608184	0	59	T	C	0.076	2.318897	1.160317	0.05070741	0.04018659	0.04881231
2	2_128615577_G_A	128615577	0	59	A	G	0.076	2.318897	1.160317	0.05070741	0.04018659	0.04881231
2	2_130738329_C_A	130738329	0	59	A	C	0.017	-5.999928	2.628018	0.02638815	0.01971856	0.02664749
2	2_130948319_T_TTG	130948319	0	59	TTG	T	0.068	-2.542476	1.216859	0.0414	0.03222085	0.04035115
2	2_130951428_A_G	130951428	0	59	G	A	0.042	-4.436803	1.631875	0.00879072	0.005936407	0.0101225
2	2_130951566_G_A	130951566	0	59	A	G	0.856	1.942478	0.9660506	0.04935717	0.03902254	0.04758517
2	2_131130588_A_G	131130588	0	59	G	A	0.017	-5.304175	2.679065	0.05282527	0.04201778	0.05073715
2	2_131414951_G_A	131414951	0	59	A	G	0.017	5.342311	2.651255	0.04889332	0.03862328	0.0471636
2	2_131415082_T_C	131415082	0	59	C	T	0.017	5.342311	2.651255	0.04889332	0.03862328	0.0471636
2	2_131487798_A_G	131487798	0	59	G	A	0.025	5.03929	2.15366	0.02301705	0.01698667	0.02354471
2	2_132021629_G_T	132021629	0	59	T	G	0.144	-2.271634	1.022818	0.03056872	0.02314939	0.03047777
2	2_132237983_A_G	132237983	0	59	G	A	0.203	-1.802436	0.6879779	0.01139612	0.007883672	0.01265044
2	2_132249600_G_A	132249600	0	59	A	G	0.186	-1.633258	0.7718467	0.03896786	0.03016352	0.03813803
2	2_132249605_G_A	132249605	0	59	A	G	0.186	-1.633258	0.7718467	0.03896786	0.03016352	0.03813803
2	2_132250073_G_A	132250073	0	59	A	G	0.042	-4.43792	1.624288	0.008483582	0.005710051	0.009820627
2	2_132250074_C_A	132250074	0	59	A	C	0.042	-4.43792	1.624288	0.008483582	0.005710051	0.009820627
2	2_132288102_T_C	132288102	0	59	C	T	0.161	-2.23815	0.7550483	0.004507935	0.002859751	0.005793697
2	2_132288362_T_C	132288362	0	59	C	T	0.263	-1.874895	0.6744339	0.0074672	0.004966492	0.00881427
2	2_132289293_T_C	132289293	0	59	C	T	0.059	-3.231058	1.426485	0.02754508	0.02066351	0.02770914
2	2_132289349_A_G	132289349	0	59	G	A	0.102	-3.300736	1.00012	0.001714884	0.0009928242	0.002684751
2	2_132290399_G_A	132290399	0	59	A	G	0.246	-1.659306	0.686497	0.01905381	0.01382081	0.01987321
2	2_135180526_A_G	135180526	0	59	G	A	0.025	-4.561019	2.158289	0.03921576	0.03037272	0.03836368
2	2_135214418_AT_A	135214418	0	59	A	AT	0.229	1.629272	0.7182736	0.02733192	0.02048913	0.02751364
2	2_136396300_T_C	136396300	0	59	C	T	0.271	-1.417372	0.7312044	0.05780827	0.04635074	0.05526704
2	2_136407445_A_G	136407445	0	59	G	A	0.271	-1.417372	0.7312044	0.05780827	0.04635074	0.05526704
2	2_136467119_C_T	136467119	0	59	T	C	0.271	-1.417372	0.7312044	0.05780827	0.04635074	0.05526704
2	2_136511874_C_T	136511874	0	59	T	C	0.042	-5.576698	1.60887	0.001042831	0.0005757795	0.001837882
2	2_136537911_G_A	136537911	0	59	A	G	0.025	-6.031611	2.074146	0.005269079	0.003391967	0.00658728
2	2_136664832_G_T	136664832	0	59	T	G	0.025	-4.227874	2.12988	0.05223056	0.04150292	0.05019663
2	2_137814477_C_G	137814477	0	59	G	C	0.39	1.584757	0.7468342	0.03844454	0.02972229	0.03766163
2	2_138413018_C_T	138413018	0	59	T	C	0.102	2.090981	1.076189	0.05724338	0.04585788	0.0547534
2	2_141298467_A_C	141298467	0	59	C	A	0.576	-1.550332	0.6167456	0.01496061	0.01061318	0.01604082
2	2_141298682_G_C	141298682	0	59	C	G	0.61	-1.449222	0.6405889	0.02772367	0.02080969	0.0278729
2	2_141299317_A_G	141299317	0	59	G	A	0.619	-1.60622	0.6229494	0.01268513	0.008862881	0.01388388
2	2_141359233_A_T	141359233	0	59	T	A	0.017	-5.048938	2.601462	0.05750913	0.04608969	0.05499503
2	2_144244912_CA_C	144244912	0	59	C	CA	0.034	-4.882464	2.086785	0.02302628	0.0169941	0.02355322
2	2_145146457_GA_G	145146457	0	59	G	GA	0.178	3.265584	0.9395543	0.001013299	0.0005579399	0.001798701
2	2_145275181_TTTG_T	145275181	0	59	T	TTTG	0.076	-4.084357	1.302437	0.002771228	0.001679137	0.00391189
2	2_145275184_G_GAC	145275184	0	59	GAC	G	0.076	-4.084357	1.302437	0.002771228	0.001679137	0.00391189
2	2_152139507_T_C	152139507	0	59	C	T	0.017	7.001144	2.490182	0.006858372	0.004525455	0.008205238
2	2_152220510_A_G	152220510	0	59	G	A	0.017	6.701943	2.53116	0.01059861	0.007282798	0.01188215
2	2_152226616_A_G	152226616	0	59	G	A	0.017	6.701943	2.53116	0.01059861	0.007282798	0.01188215
2	2_152267061_G_A	152267061	0	59	A	G	0.085	-2.014432	1.035768	0.05700622	0.04565108	0.05453777
2	2_152299764_C_T	152299764	0	59	T	C	0.017	6.701943	2.53116	0.01059861	0.007282798	0.01188215
2	2_152311612_A_G	152311612	0	59	G	A	0.017	5.18611	2.624383	0.05325862	0.04239325	0.05113103
2	2_152314547_C_CA	152314547	0	59	CA	C	0.788	1.630262	0.771191	0.0391536	0.03032025	0.0383071
2	2_152322095_A_T	152322095	0	59	T	A	0.78	1.715003	0.7663615	0.02937716	0.02216703	0.02938764
2	2_152331418_C_G	152331418	0	59	G	C	0.78	1.715003	0.7663615	0.02937716	0.02216703	0.02938764
2	2_152346494_A_C	152346494	0	59	C	A	0.068	3.305121	1.372679	0.0194952	0.01417069	0.0202837
2	2_152369397_C_CAACA	152369397	0	59	CAACA	C	0.017	5.18611	2.624383	0.05325862	0.04239325	0.05113103
2	2_152372907_A_G	152372907	0	59	G	A	0.017	5.18611	2.624383	0.05325862	0.04239325	0.05113103
2	2_152375650_AAGTGAGAT_A	152375650	0	59	A	AAGTGAGAT	0.017	5.18611	2.624383	0.05325862	0.04239325	0.05113103
2	2_152382759_T_C	152382759	0	59	C	T	0.017	5.18611	2.624383	0.05325862	0.04239325	0.05113103
2	2_152389991_A_G	152389991	0	59	G	A	0.017	5.18611	2.624383	0.05325862	0.04239325	0.05113103
2	2_152409296_G_A	152409296	0	59	A	G	0.017	5.18611	2.624383	0.05325862	0.04239325	0.05113103
2	2_152417472_G_T	152417472	0	59	T	G	0.017	5.18611	2.624383	0.05325862	0.04239325	0.05113103
2	2_153192242_C_A	153192242	0	59	A	C	0.059	3.119713	1.463821	0.03764037	0.02904527	0.03692939
2	2_157425972_G_A	157425972	0	59	A	G	0.034	4.074641	1.890028	0.03556777	0.0273063	0.03504108
2	2_158958679_T_A	158958679	0	59	A	T	0.017	5.042413	2.599924	0.05767869	0.04623764	0.05514921
2	2_160082364_A_G	160082364	0	59	G	A	0.475	1.34857	0.6873905	0.05494073	0.04385318	0.05266001
2	2_160585740_C_A	160585740	0	59	A	C	0.381	1.309834	0.6677596	0.05498066	0.04388788	0.05269631
2	2_160599595_G_A	160599595	0	59	A	G	0.017	6.701943	2.53116	0.01059861	0.007282798	0.01188215
2	2_160599717_C_G	160599717	0	59	G	C	0.102	-2.357303	1.157861	0.04667732	0.0367204	0.04514951
2	2_160602258_A_G	160602258	0	59	G	A	0.398	-1.551904	0.6339458	0.01764537	0.01270932	0.01856012
2	2_160663435_T_C	160663435	0	59	C	T	0.39	-1.466832	0.6324249	0.02418618	0.01793034	0.02462253
2	2_160673519_G_A	160673519	0	59	A	G	0.068	-3.000727	1.361636	0.03182476	0.02418857	0.03162575
2	2_165353712_C_T	165353712	0	59	T	C	0.712	1.484688	0.7259224	0.04571638	0.03589764	0.04427602
2	2_165551201_T_C	165551201	0	59	C	T	0.11	2.429409	1.127706	0.03569678	0.02741428	0.03515866
2	2_165551404_G_A	165551404	0	59	A	G	0.127	2.394947	1.069548	0.0292829	0.02208946	0.02930135
2	2_165552353_GA_G	165552353	0	59	G	GA	0.11	2.429409	1.127706	0.03569678	0.02741428	0.03515866
2	2_165557318_C_T	165557318	0	59	T	C	0.356	1.839965	0.6469751	0.006280151	0.004109915	0.00762176
2	2_166896178_C_T	166896178	0	59	T	C	0.28	-1.656476	0.7650576	0.03481212	0.02667445	0.03435217
2	2_167138320_TA_TAA	167138320	0	59	TAA	TA	0.042	3.303874	1.698356	0.05694828	0.04560057	0.05448509
2	2_167138389_C_CT	167138389	0	59	CT	C	0.059	3.332531	1.70192	0.0553929	0.04424628	0.05307105
2	2_167268972_C_G	167268972	0	59	G	C	0.025	3.930813	1.611092	0.01800749	0.01299435	0.01889821
2	2_167313313_AATATATATAT_AATATAT	167313313	0	59	AATATAT	AATATATATAT	0.347	1.278619	0.5812436	0.03212102	0.02443422	0.03189637
2	2_169020187_G_A	169020187	0	59	A	G	0.059	-3.388536	1.437855	0.02209726	0.01624725	0.02269525
2	2_169103871_CGCCGCCGCCGCTGTCACCGGG_C	169103871	0	59	C	CGCCGCCGCCGCTGTCACCGGG	0.042	2.903928	1.46778	0.05298857	0.04215924	0.05088558
2	2_169103999_T_G	169103999	0	59	G	T	0.085	3.272331	1.073393	0.003556433	0.002206305	0.004777762
2	2_169681151_C_T	169681151	0	59	T	C	0.025	-4.828876	2.131737	0.02753316	0.02065375	0.02769821
2	2_169842746_T_C	169842746	0	59	C	T	0.017	-5.815772	2.662274	0.03328527	0.02540147	0.03295932
2	2_169842811_C_T	169842811	0	59	T	C	0.017	-5.815772	2.662274	0.03328527	0.02540147	0.03295932
2	2_169842825_G_A	169842825	0	59	A	G	0.017	-5.815772	2.662274	0.03328527	0.02540147	0.03295932
2	2_169842863_G_A	169842863	0	59	A	G	0.017	-5.815772	2.662274	0.03328527	0.02540147	0.03295932
2	2_169869774_C_T	169869774	0	59	T	C	0.017	-5.815772	2.662274	0.03328527	0.02540147	0.03295932
2	2_169870882_A_G	169870882	0	59	G	A	0.042	-4.424513	1.649319	0.009673153	0.006590709	0.01098482
2	2_170082013_A_G	170082013	0	59	G	A	0.415	-1.476623	0.7006876	0.03974272	0.03081779	0.03884328
2	2_170099446_T_G	170099446	0	59	G	T	0.432	-1.49353	0.687366	0.03419998	0.02616349	0.0337939
2	2_170099473_T_C	170099473	0	59	C	T	0.415	-1.601472	0.6738813	0.02105332	0.01541136	0.02172934
2	2_170099895_A_C	170099895	0	59	C	A	0.441	-1.553761	0.6713211	0.02447307	0.01816253	0.02488671
2	2_170099899_G_A	170099899	0	59	A	G	0.432	-1.49353	0.687366	0.03419998	0.02616349	0.0337939
2	2_170103336_T_C	170103336	0	59	C	T	0.432	-1.49353	0.687366	0.03419998	0.02616349	0.0337939
2	2_170103351_G_T	170103351	0	59	T	G	0.475	-1.347027	0.6368195	0.03903885	0.03022341	0.03820265
2	2_170115588_T_C	170115588	0	59	C	T	0.458	-1.600241	0.6887446	0.02395162	0.01774068	0.02440646
2	2_170151226_G_T	170151226	0	59	T	G	0.025	4.488299	2.131698	0.03991361	0.03096224	0.03899879
2	2_170163816_G_T	170163816	0	59	T	G	0.102	2.266855	1.160054	0.05587724	0.04466766	0.05351136
2	2_170393925_G_A	170393925	0	59	A	G	0.381	1.956086	0.6912399	0.006526105	0.004286257	0.007870598
2	2_170394487_T_A	170394487	0	59	A	T	0.373	1.956686	0.691544	0.006532799	0.004291065	0.007877357
2	2_170428127_T_G	170428127	0	59	G	T	0.364	1.944164	0.7230769	0.009518837	0.006475879	0.01083453
2	2_170441001_G_A	170441001	0	59	A	G	0.144	-2.248019	0.8861091	0.01410411	0.009951309	0.01523164
2	2_170463547_T_C	170463547	0	59	C	T	0.127	-2.104474	0.9069987	0.02413463	0.01788864	0.02457505
2	2_170463551_T_G	170463551	0	59	G	T	0.364	1.512484	0.7048132	0.03639007	0.0279952	0.03579047
2	2_170488454_A_G	170488454	0	59	G	A	0.61	-1.380217	0.7024213	0.05457436	0.04353488	0.05232698
2	2_170492567_A_G	170492567	0	59	G	A	0.61	-1.380217	0.7024213	0.05457436	0.04353488	0.05232698
2	2_170492584_T_C	170492584	0	59	C	T	0.644	-1.744799	0.6906929	0.0144966	0.01025417	0.01560282
2	2_170493103_T_A	170493103	0	59	A	T	0.619	-1.527973	0.7287983	0.04073162	0.0316544	0.0397431
2	2_170632896_T_C	170632896	0	59	C	T	0.237	-1.719986	0.7231441	0.02095079	0.01532946	0.02163437
2	2_170632960_C_CA	170632960	0	59	CA	C	0.61	1.886556	0.7855025	0.01978899	0.01440397	0.02055668
2	2_170632969_C_A	170632969	0	59	A	C	0.712	1.518296	0.7298973	0.04227179	0.03296089	0.04114411
2	2_170633023_T_TA	170633023	0	59	TA	T	0.712	1.518296	0.7298973	0.04227179	0.03296089	0.04114411
2	2_170684224_C_T	170684224	0	59	T	C	0.593	1.802714	0.6511953	0.007704131	0.005139038	0.009049954
2	2_170929880_G_A	170929880	0	59	A	G	0.271	-1.434235	0.7328779	0.05552689	0.04436282	0.05319285
2	2_171259308_T_G	171259308	0	59	G	T	0.11	-2.308846	1.145588	0.04884886	0.03858502	0.04712319
2	2_172016727_CG_C	172016727	0	59	C	CG	0.068	3.04506	1.352797	0.02848265	0.02143187	0.0285685
2	2_172409790_TA_T	172409790	0	59	T	TA	0.119	-1.985473	0.9415169	0.03961539	0.03071019	0.0387274
2	2_173344680_A_C	173344680	0	59	C	A	0.051	-3.015235	1.540606	0.05550458	0.04434342	0.05317258
2	2_173352157_A_T	173352157	0	59	T	A	0.051	-3.015235	1.540606	0.05550458	0.04434342	0.05317258
2	2_173352824_C_T	173352824	0	59	T	C	0.051	-3.015235	1.540606	0.05550458	0.04434342	0.05317258
2	2_173353000_A_AT	173353000	0	59	AT	A	0.051	-3.015235	1.540606	0.05550458	0.04434342	0.05317258
2	2_173423645_CT_C	173423645	0	59	C	CT	0.017	7.001144	2.490182	0.006858372	0.004525455	0.008205238
2	2_173427053_T_G	173427053	0	59	G	T	0.11	2.486222	1.019099	0.01801721	0.01300201	0.01890728
2	2_173427420_C_G	173427420	0	59	G	C	0.025	-5.075543	2.115846	0.01993049	0.01451643	0.02068809
2	2_173433397_A_G	173433397	0	59	G	A	0.025	-5.075543	2.115846	0.01993049	0.01451643	0.02068809
2	2_173451074_T_C	173451074	0	59	C	T	0.025	-5.075543	2.115846	0.01993049	0.01451643	0.02068809
2	2_173460640_T_C	173460640	0	59	C	T	0.11	2.486222	1.019099	0.01801721	0.01300201	0.01890728
2	2_174055966_AAG_A	174055966	0	59	A	AAG	0.034	4.382985	1.913823	0.02594345	0.01935632	0.02623902
2	2_175200903_G_C	175200903	0	59	C	G	0.28	2.026036	0.6074584	0.001546022	0.0008862763	0.002478578
2	2_175304621_C_G	175304621	0	59	G	C	0.042	4.741494	1.616553	0.004915886	0.003144048	0.006220837
2	2_176867091_T_G	176867091	0	59	G	T	0.017	5.557568	2.581995	0.0358501	0.02754267	0.03529841
2	2_176957822_G_A	176957822	0	59	A	G	0.331	-1.698605	0.6632627	0.01326502	0.009306416	0.01443583
2	2_176964947_G_A	176964947	0	59	A	G	0.042	3.659614	1.687196	0.03450056	0.02641429	0.03406805
2	2_176987456_C_A	176987456	0	59	A	C	0.042	-4.044837	1.64934	0.01745336	0.01255839	0.01838068
2	2_177497760_C_T	177497760	0	59	T	C	0.025	4.165358	2.118307	0.05440584	0.04338852	0.05217379
2	2_178494205_T_G	178494205	0	59	G	T	0.017	6.135926	2.555267	0.01981012	0.01442075	0.0205763
2	2_178528703_C_T	178528703	0	59	T	C	0.89	-2.908947	1.132802	0.01303136	0.009127483	0.01421363
2	2_178534324_A_G	178534324	0	59	G	A	0.89	-2.908947	1.132802	0.01303136	0.009127483	0.01421363
2	2_179236831_A_G	179236831	0	59	G	A	0.517	-1.83013	0.6771236	0.009172031	0.006218436	0.010496
2	2_179325735_C_T	179325735	0	59	T	C	0.085	2.417522	1.107336	0.03338801	0.02548697	0.03305308
2	2_179395067_C_G	179395067	0	59	G	C	0.11	3.290128	0.970705	0.001314984	0.0007422936	0.002189992
2	2_179453429_G_A	179453429	0	59	A	G	0.025	5.063832	2.108676	0.01980321	0.01441527	0.02056989
2	2_179478746_C_CT	179478746	0	59	CT	C	0.025	-4.7219	2.136188	0.03133235	0.02378074	0.03117584
2	2_179518911_TAGC_T	179518911	0	59	T	TAGC	0.212	2.630067	0.6989342	0.0004154273	0.0002099921	0.0009380501
2	2_179527095_G_A	179527095	0	59	A	G	0.017	-4.055044	1.843329	0.03211732	0.02443115	0.03189299
2	2_179554305_C_T	179554305	0	59	T	C	0.347	-1.620592	0.7883705	0.04466768	0.03500145	0.04332268
2	2_179642425_G_A	179642425	0	59	A	G	0.983	5.268731	2.661998	0.05289715	0.04208004	0.05080248
2	2_179643886_A_G	179643886	0	59	G	A	0.983	5.268731	2.661998	0.05289715	0.04208004	0.05080248
2	2_179643934_A_G	179643934	0	59	G	A	0.983	5.268731	2.661998	0.05289715	0.04208004	0.05080248
2	2_179644035_G_A	179644035	0	59	A	G	0.983	5.268731	2.661998	0.05289715	0.04208004	0.05080248
2	2_179647823_C_T	179647823	0	59	T	C	0.017	-5.268731	2.661998	0.05289715	0.04208004	0.05080248
2	2_179659334_A_C	179659334	0	59	C	A	0.017	-5.268731	2.661998	0.05289715	0.04208004	0.05080248
2	2_179659912_G_A	179659912	0	59	A	G	0.017	5.855472	2.567479	0.02654174	0.0198438	0.02678851
2	2_179660030_T_C	179660030	0	59	C	T	0.017	-5.268731	2.661998	0.05289715	0.04208004	0.05080248
2	2_179666830_G_A	179666830	0	59	A	G	0.119	2.717619	0.9756979	0.007360471	0.00488893	0.008707869
2	2_179669227_CTGGAG_C	179669227	0	59	C	CTGGAG	0.017	-5.268731	2.661998	0.05289715	0.04208004	0.05080248
2	2_179721046_G_A	179721046	0	59	A	G	0.127	2.810406	0.9477746	0.004495124	0.002850861	0.005780211
2	2_179732979_A_AG	179732979	0	59	AG	A	0.025	-4.605699	2.124387	0.03458355	0.02648357	0.03414374
2	2_179732980_A_G	179732980	0	59	G	A	0.763	-2.241414	0.8578413	0.01160635	0.008042721	0.01285228
2	2_179732997_A_T	179732997	0	59	T	A	0.237	-1.64802	0.7699149	0.03684544	0.02837728	0.03620534
2	2_179753245_C_T	179753245	0	59	T	C	0.703	-2.486253	0.7438699	0.001513879	0.0008661153	0.002438907
2	2_179839962_T_C	179839962	0	59	C	T	0.017	-5.268731	2.661998	0.05289715	0.04208004	0.05080248
2	2_182363577_G_C	182363577	0	59	C	G	0.017	-5.730764	2.596084	0.03155072	0.02396154	0.03137539
2	2_182399097_T_C	182399097	0	59	C	T	0.636	1.522623	0.7015552	0.03439669	0.0263276	0.03397332
2	2_182413259_A_G	182413259	0	59	G	A	0.636	1.522623	0.7015552	0.03439669	0.0263276	0.03397332
2	2_182413602_A_T	182413602	0	59	T	A	0.636	1.522623	0.7015552	0.03439669	0.0263276	0.03397332
2	2_186610344_T_G	186610344	0	59	G	T	0.576	1.487898	0.6816554	0.03342026	0.02551381	0.03308251
2	2_186625770_A_G	186625770	0	59	G	A	0.568	1.684187	0.6911602	0.01814635	0.01310379	0.01902777
2	2_186627943_T_C	186627943	0	59	C	T	0.576	1.487898	0.6816554	0.03342026	0.02551381	0.03308251
2	2_186629349_G_A	186629349	0	59	A	G	0.576	1.487898	0.6816554	0.03342026	0.02551381	0.03308251
2	2_186654592_A_G	186654592	0	59	G	A	0.576	1.487898	0.6816554	0.03342026	0.02551381	0.03308251
2	2_186656956_T_C	186656956	0	59	C	T	0.576	1.487898	0.6816554	0.03342026	0.02551381	0.03308251
2	2_186657089_C_A	186657089	0	59	A	C	0.576	1.487898	0.6816554	0.03342026	0.02551381	0.03308251
2	2_186658056_G_A	186658056	0	59	A	G	0.576	1.487898	0.6816554	0.03342026	0.02551381	0.03308251
2	2_186658438_C_T	186658438	0	59	T	C	0.576	1.487898	0.6816554	0.03342026	0.02551381	0.03308251
2	2_186658565_G_T	186658565	0	59	T	G	0.576	1.487898	0.6816554	0.03342026	0.02551381	0.03308251
2	2_186659184_C_A	186659184	0	59	A	C	0.119	-2.741478	1.086583	0.01461226	0.01034356	0.01571207
2	2_186659359_G_T	186659359	0	59	T	G	0.568	1.597055	0.6641988	0.01965469	0.01429729	0.02043192
2	2_186661673_A_G	186661673	0	59	G	A	0.576	1.487898	0.6816554	0.03342026	0.02551381	0.03308251
2	2_186664473_T_C	186664473	0	59	C	T	0.568	1.684187	0.6911602	0.01814635	0.01310379	0.01902777
2	2_186664963_C_A	186664963	0	59	A	C	0.576	1.487898	0.6816554	0.03342026	0.02551381	0.03308251
2	2_186665432_G_A	186665432	0	59	A	G	0.576	1.487898	0.6816554	0.03342026	0.02551381	0.03308251
2	2_186665824_A_G	186665824	0	59	G	A	0.576	1.487898	0.6816554	0.03342026	0.02551381	0.03308251
2	2_186667121_T_C	186667121	0	59	C	T	0.576	1.487898	0.6816554	0.03342026	0.02551381	0.03308251
2	2_186668935_A_G	186668935	0	59	G	A	0.356	-1.353132	0.661068	0.04554877	0.03575429	0.04412366
2	2_186670780_T_A	186670780	0	59	A	T	0.576	1.487898	0.6816554	0.03342026	0.02551381	0.03308251
2	2_186671357_G_A	186671357	0	59	A	G	0.576	1.487898	0.6816554	0.03342026	0.02551381	0.03308251
2	2_186671912_G_A	186671912	0	59	A	G	0.576	1.487898	0.6816554	0.03342026	0.02551381	0.03308251
2	2_186678241_A_AT	186678241	0	59	AT	A	0.551	1.340677	0.6671099	0.04947308	0.03912236	0.04769051
2	2_186680041_G_T	186680041	0	59	T	G	0.568	1.505566	0.6686516	0.02843491	0.02139269	0.02852477
2	2_186692859_CT_C	186692859	0	59	C	CT	0.186	2.02031	0.9756282	0.04317374	0.03372793	0.04196434
2	2_187455278_C_T	187455278	0	59	T	C	0.788	1.842234	0.9039723	0.04646783	0.03654091	0.04495908
2	2_187487160_G_A	187487160	0	59	A	G	0.788	1.842234	0.9039723	0.04646783	0.03654091	0.04495908
2	2_187490371_T_G	187490371	0	59	G	T	0.788	1.842234	0.9039723	0.04646783	0.03654091	0.04495908
2	2_187490389_G_T	187490389	0	59	T	G	0.788	1.842234	0.9039723	0.04646783	0.03654091	0.04495908
2	2_187498107_T_C	187498107	0	59	C	T	0.271	-2.44092	0.7980723	0.003457619	0.002139308	0.004670369
2	2_187519338_G_T	187519338	0	59	T	G	0.237	-2.122843	0.8760331	0.01876462	0.01359197	0.019604
2	2_187528635_A_G	187528635	0	59	G	A	0.263	-2.176605	0.8341857	0.01171496	0.008124987	0.01295645
2	2_187626338_C_T	187626338	0	59	T	C	0.288	-2.380279	0.808006	0.0047446	0.003024403	0.00604203
2	2_189875125_A_G	189875125	0	59	G	A	0.034	-3.761875	1.859943	0.04808118	0.03792501	0.04642548
2	2_190313268_C_T	190313268	0	59	T	C	0.034	3.766428	1.858236	0.04762377	0.03753218	0.04600975
2	2_190313570_T_A	190313570	0	59	A	T	0.034	3.766428	1.858236	0.04762377	0.03753218	0.04600975
2	2_190313613_G_T	190313613	0	59	T	G	0.034	3.766428	1.858236	0.04762377	0.03753218	0.04600975
2	2_190314052_C_T	190314052	0	59	T	C	0.034	3.766428	1.858236	0.04762377	0.03753218	0.04600975
2	2_190314085_T_C	190314085	0	59	C	T	0.034	3.766428	1.858236	0.04762377	0.03753218	0.04600975
2	2_190315720_G_C	190315720	0	59	C	G	0.034	3.766428	1.858236	0.04762377	0.03753218	0.04600975
2	2_190315723_A_C	190315723	0	59	C	A	0.034	3.766428	1.858236	0.04762377	0.03753218	0.04600975
2	2_190316625_T_C	190316625	0	59	C	T	0.034	3.766428	1.858236	0.04762377	0.03753218	0.04600975
2	2_190320083_C_A	190320083	0	59	A	C	0.034	3.766428	1.858236	0.04762377	0.03753218	0.04600975
2	2_190321978_G_GA	190321978	0	59	GA	G	0.051	3.13862	1.562445	0.04957063	0.03920638	0.04777917
2	2_190324047_A_G	190324047	0	59	G	A	0.034	3.766428	1.858236	0.04762377	0.03753218	0.04600975
2	2_190324195_T_C	190324195	0	59	C	T	0.034	3.766428	1.858236	0.04762377	0.03753218	0.04600975
2	2_190324215_G_A	190324215	0	59	A	G	0.034	3.766428	1.858236	0.04762377	0.03753218	0.04600975
2	2_190327179_A_G	190327179	0	59	G	A	0.034	3.766428	1.858236	0.04762377	0.03753218	0.04600975
2	2_190327389_A_G	190327389	0	59	G	A	0.034	3.766428	1.858236	0.04762377	0.03753218	0.04600975
2	2_190328382_C_T	190328382	0	59	T	C	0.034	3.766428	1.858236	0.04762377	0.03753218	0.04600975
2	2_190328561_C_T	190328561	0	59	T	C	0.034	3.766428	1.858236	0.04762377	0.03753218	0.04600975
2	2_190328699_A_AT	190328699	0	59	AT	A	0.034	3.766428	1.858236	0.04762377	0.03753218	0.04600975
2	2_190329873_A_G	190329873	0	59	G	A	0.034	3.766428	1.858236	0.04762377	0.03753218	0.04600975
2	2_190331081_A_G	190331081	0	59	G	A	0.034	3.766428	1.858236	0.04762377	0.03753218	0.04600975
2	2_190444630_C_G	190444630	0	59	G	C	0.805	1.730124	0.7795563	0.03068275	0.02324358	0.03058204
2	2_190445076_T_G	190445076	0	59	G	T	0.636	1.512145	0.6256019	0.01905187	0.01381928	0.0198714
2	2_190541842_ATT_ATTT	190541842	0	59	ATTT	ATT	0.059	3.135907	1.570746	0.05093762	0.04038533	0.04902154
2	2_191841759_G_A	191841759	0	59	A	G	0.237	1.74107	0.8337246	0.04150057	0.03230615	0.04044263
2	2_191860012_A_C	191860012	0	59	C	A	0.034	6.662804	2.037982	0.001879362	0.001097563	0.002882319
2	2_191862901_T_C	191862901	0	59	C	T	0.025	-4.248521	2.13814	0.05200345	0.04130644	0.04999022
2	2_192225294_A_G	192225294	0	59	G	A	0.475	1.355966	0.6770902	0.0502477	0.03978997	0.04839451
2	2_192225477_G_GTGTTGT	192225477	0	59	GTGTTGT	G	0.144	2.213405	1.041648	0.03818718	0.02950549	0.03742732
2	2_192818602_T_C	192818602	0	59	C	T	0.025	-4.649469	2.128056	0.03325976	0.02538024	0.03293603
2	2_196659034_G_A	196659034	0	59	A	G	0.068	-2.507594	1.197637	0.04098909	0.03187251	0.03997735
2	2_196825027_T_C	196825027	0	59	C	T	0.017	5.944095	2.566012	0.02435605	0.01806779	0.02477897
2	2_197643854_CTT_CT	197643854	0	59	CT	CTT	0.178	2.138888	1.033055	0.04320558	0.03375503	0.0419933
2	2_197654578_GA_G	197654578	0	59	G	GA	0.119	2.28257	1.11272	0.04509748	0.03536853	0.04371341
2	2_197709173_TA_TAA	197709173	0	59	TAA	TA	0.153	2.616036	1.008606	0.01219502	0.008489444	0.01341602
2	2_198643651_A_G	198643651	0	59	G	A	0.144	-1.939673	0.9673305	0.04996672	0.0395477	0.04813915
2	2_201337806_GA_G	201337806	0	59	G	GA	0.136	-2.067089	1.056104	0.05549214	0.0443326	0.05316127
2	2_201521509_C_T	201521509	0	59	T	C	0.093	2.177868	1.099979	0.05281868	0.04201206	0.05073116
2	2_201806036_C_T	201806036	0	59	T	C	0.017	6.514181	2.536791	0.01303264	0.009128464	0.01421485
2	2_202505719_AT_A	202505719	0	59	A	AT	0.119	2.401573	1.104203	0.03403338	0.02602456	0.03364192
2	2_202571562_C_T	202571562	0	59	T	C	0.136	-2.531605	0.9737655	0.01200466	0.008344764	0.01323394
2	2_202587706_T_TA	202587706	0	59	TA	T	0.093	2.978397	1.059702	0.006875101	0.004537527	0.008222043
2	2_202589257_T_C	202589257	0	59	C	T	0.144	-2.492794	0.9628456	0.01234455	0.008603238	0.01355891
2	2_202593280_G_A	202593280	0	59	A	G	0.102	2.507911	1.043677	0.01972873	0.01435609	0.0205007
2	2_202622509_T_C	202622509	0	59	C	T	0.136	-2.995865	1.040485	0.005701886	0.003697867	0.007032551
2	2_202630513_T_C	202630513	0	59	C	T	0.136	-2.995865	1.040485	0.005701886	0.003697867	0.007032551
2	2_202633582_A_G	202633582	0	59	G	A	0.136	-2.995865	1.040485	0.005701886	0.003697867	0.007032551
2	2_202672143_G_GA	202672143	0	59	GA	G	0.246	-1.913615	0.7389973	0.01232903	0.00859142	0.01354408
2	2_202677263_C_G	202677263	0	59	G	C	0.034	-3.933224	1.845337	0.03762074	0.02902877	0.03691152
2	2_202955454_G_C	202955454	0	59	C	G	0.847	2.103877	0.9660354	0.03380455	0.02583384	0.03343316
2	2_203906434_AT_A	203906434	0	59	A	AT	0.017	-6.724528	2.616643	0.01296516	0.00907684	0.01415063
2	2_206305156_C_T	206305156	0	59	T	C	0.076	-2.629467	1.306426	0.049142	0.03883729	0.04738961
2	2_206631601_TG_T	206631601	0	59	T	TG	0.085	3.959744	1.174084	0.001382887	0.0007843804	0.002275675
2	2_206921451_G_A	206921451	0	59	A	G	0.797	-2.284134	0.95444	0.02020971	0.01473856	0.02094727
2	2_207172627_A_G	207172627	0	59	G	A	0.644	1.616685	0.777148	0.04225954	0.03295049	0.04113297
2	2_207173390_G_A	207173390	0	59	A	G	0.025	-4.41911	2.125377	0.04236131	0.03303696	0.04122552
2	2_207174316_T_C	207174316	0	59	C	T	0.653	1.569567	0.7698402	0.04637583	0.03646211	0.04487547
2	2_207175070_G_A	207175070	0	59	A	G	0.025	-4.41911	2.125377	0.04236131	0.03303696	0.04122552
2	2_207457292_A_T	207457292	0	59	T	A	0.017	5.267511	2.582264	0.04626653	0.0363685	0.04477611
2	2_207459467_C_T	207459467	0	59	T	C	0.093	3.269425	1.183937	0.007846393	0.005242877	0.009191135
2	2_207603221_T_C	207603221	0	59	C	T	0.085	2.832376	1.237862	0.02607119	0.01946031	0.02635637
2	2_207604427_G_A	207604427	0	59	A	G	0.085	2.832376	1.237862	0.02607119	0.01946031	0.02635637
2	2_207615724_C_T	207615724	0	59	T	C	0.042	5.210376	1.602862	0.001985251	0.001165456	0.003008004
2	2_208461563_G_GA	208461563	0	59	GA	G	0.034	-3.798996	1.848791	0.04474448	0.03506702	0.0433925
2	2_208605492_G_T	208605492	0	59	T	G	0.034	-4.174504	1.837152	0.027076	0.02027994	0.02727886
2	2_208633627_C_T	208633627	0	59	T	C	0.246	1.560491	0.7322368	0.03764747	0.02905125	0.03693585
2	2_208811284_C_T	208811284	0	59	T	C	0.254	1.732491	0.6895631	0.01500923	0.01065085	0.01608666
2	2_209104740_G_C	209104740	0	59	C	G	0.034	-3.682315	1.855163	0.05224529	0.04151566	0.05021001
2	2_209179939_A_G	209179939	0	59	G	A	0.034	-3.682315	1.855163	0.05224529	0.04151566	0.05021001
2	2_209215571_T_C	209215571	0	59	C	T	0.034	-3.682315	1.855163	0.05224529	0.04151566	0.05021001
2	2_209315445_C_CCT	209315445	0	59	CCT	C	0.034	-3.682315	1.855163	0.05224529	0.04151566	0.05021001
2	2_209315446_TAG_T	209315446	0	59	T	TAG	0.034	-3.682315	1.855163	0.05224529	0.04151566	0.05021001
2	2_209353800_A_G	209353800	0	59	G	A	0.068	-3.627566	1.331198	0.008647202	0.005830545	0.009981563
2	2_211421429_T_G	211421429	0	59	G	T	0.017	5.379311	2.586676	0.04232214	0.03300367	0.04118989
2	2_211456637_A_G	211456637	0	59	G	A	0.551	2.03872	0.8511202	0.02010218	0.01465299	0.02084748
2	2_211456639_C_T	211456639	0	59	T	C	0.551	2.03872	0.8511202	0.02010218	0.01465299	0.02084748
2	2_211481257_C_G	211481257	0	59	G	C	0.551	1.665952	0.8058911	0.0435208	0.03402345	0.04227993
2	2_211507399_GA_G	211507399	0	59	G	GA	0.017	5.379311	2.586676	0.04232214	0.03300367	0.04118989
2	2_211541721_A_G	211541721	0	59	G	A	0.059	2.822748	1.293972	0.03352226	0.02559873	0.03317559
2	2_212251864_T_C	212251864	0	59	C	T	0.347	-1.448023	0.7244237	0.05066736	0.04015203	0.04877592
2	2_212488828_GTC_G	212488828	0	59	G	GTC	0.136	2.461421	1.052966	0.02314364	0.01708865	0.02366152
2	2_212543924_A_G	212543924	0	59	G	A	0.5	1.219648	0.6284231	0.05750929	0.04608983	0.05499518
2	2_213872836_TAA_T	213872836	0	59	T	TAA	0.034	4.545536	1.820696	0.01562248	0.011127	0.01666416
2	2_215661716_CA_C	215661716	0	59	C	CA	0.025	4.502178	2.104701	0.03696545	0.02847805	0.03631467
2	2_215661911_A_C	215661911	0	59	C	A	0.017	5.032953	2.585781	0.05681792	0.04548695	0.05436657
2	2_215674224_G_A	215674224	0	59	A	G	0.398	-1.619526	0.6383767	0.01410453	0.009951634	0.01523204
2	2_215797332_C_T	215797332	0	59	T	C	0.424	-1.47853	0.6751815	0.03287646	0.02506149	0.03258617
2	2_215813900_T_A	215813900	0	59	A	T	0.025	5.031892	2.581758	0.05649603	0.04520646	0.05407391
2	2_215819853_T_C	215819853	0	59	C	T	0.025	5.031892	2.581758	0.05649603	0.04520646	0.05407391
2	2_215820013_G_A	215820013	0	59	A	G	0.424	-1.375057	0.6767284	0.0470939	0.03707754	0.04552815
2	2_215831743_T_C	215831743	0	59	C	T	0.025	5.031892	2.581758	0.05649603	0.04520646	0.05407391
2	2_217069151_A_G	217069151	0	59	G	A	0.449	-1.615555	0.6251276	0.01249249	0.008715944	0.01370015
2	2_218674484_C_T	218674484	0	59	T	C	0.068	-3.646233	1.329158	0.008237769	0.005529431	0.009578317
2	2_218674697_C_T	218674697	0	59	T	C	0.619	-1.43995	0.6636118	0.0344354	0.0263599	0.03400862
2	2_218678582_C_T	218678582	0	59	T	C	0.042	-4.234502	1.837114	0.02503904	0.0186213	0.02540756
2	2_218682474_A_G	218682474	0	59	G	A	0.475	-1.293122	0.5850246	0.03133681	0.02378443	0.03117991
2	2_218682771_A_G	218682771	0	59	G	A	0.475	-1.293122	0.5850246	0.03133681	0.02378443	0.03117991
2	2_218683154_A_G	218683154	0	59	G	A	0.619	-1.43995	0.6636118	0.0344354	0.0263599	0.03400862
2	2_218683257_A_G	218683257	0	59	G	A	0.475	-1.293122	0.5850246	0.03133681	0.02378443	0.03117991
2	2_218683368_C_T	218683368	0	59	T	C	0.314	-2.103837	0.6274692	0.001466908	0.000836727	0.002380671
2	2_218694551_A_G	218694551	0	59	G	A	0.28	-1.369506	0.702358	0.05639178	0.04511565	0.05397913
2	2_218712886_GGCT_G	218712886	0	59	G	GGCT	0.059	-3.4169	1.475953	0.02443979	0.01813558	0.02485608
2	2_218935299_T_C	218935299	0	59	C	T	0.119	3.441768	0.852296	0.000171354	7.95227e-05	0.0005077503
2	2_219000292_C_T	219000292	0	59	T	C	0.042	4.112749	1.658164	0.01627611	0.01163636	0.0172782
2	2_219000966_G_A	219000966	0	59	A	G	0.458	-1.712201	0.8429758	0.04717563	0.03714763	0.04560243
2	2_219252630_C_T	219252630	0	59	T	C	0.059	4.237825	1.443267	0.004872682	0.003113833	0.006175806
2	2_219755011_T_A	219755011	0	59	A	T	0.017	5.314155	2.687449	0.05311064	0.042265	0.05099652
2	2_220173910_A_C	220173910	0	59	C	A	0.034	3.803235	1.961826	0.05778171	0.04632755	0.05524288
2	2_220313680_G_C	220313680	0	59	C	G	0.034	-3.705343	1.858888	0.05128967	0.04068939	0.04934149
2	2_223498056_G_GT	223498056	0	59	GT	G	0.076	2.949439	1.331931	0.03104197	0.0235405	0.03091044
2	2_223785740_A_G	223785740	0	59	G	A	0.373	1.639739	0.6985036	0.02259483	0.01664692	0.02315495
2	2_224856650_G_A	224856650	0	59	A	G	0.085	-2.560996	1.272499	0.04915783	0.03885091	0.047404
2	2_225244352_G_A	225244352	0	59	A	G	0.076	2.49061	1.145745	0.03412389	0.02610003	0.03372449
2	2_225434527_G_T	225434527	0	59	T	G	0.042	3.583517	1.696842	0.03933945	0.03047714	0.03847626
2	2_225729224_TA_T	225729224	0	59	T	TA	0.144	2.180505	1.038732	0.04048901	0.03144899	0.03952237
2	2_227915924_T_C	227915924	0	59	C	T	0.093	2.60565	1.186723	0.03243201	0.02469229	0.03218038
2	2_227922321_A_G	227922321	0	59	G	A	0.076	2.657397	1.297724	0.04546248	0.0356805	0.04404522
2	2_228477775_G_A	228477775	0	59	A	G	0.034	-5.519398	1.852844	0.004327454	0.002734724	0.005603258
2	2_228680153_CT_C	228680153	0	59	C	CT	0.28	2.976338	0.9044735	0.001764549	0.001024355	0.002744726
2	2_228783479_C_A	228783479	0	59	A	C	0.246	-2.4811	0.7494213	0.001663118	0.0009600513	0.00262193
2	2_228883029_A_C	228883029	0	59	C	A	0.305	-1.454116	0.6880534	0.03920508	0.03036371	0.03835396
2	2_231050715_A_G	231050715	0	59	G	A	0.831	-1.985613	0.9362375	0.0385432	0.02980543	0.03775145
2	2_231077112_G_A	231077112	0	59	A	G	0.186	-2.279132	0.8815634	0.01246137	0.008692225	0.01367045
2	2_231077154_G_A	231077154	0	59	A	G	0.203	-1.79401	0.8342891	0.03602272	0.02768727	0.03545572
2	2_231077725_A_G	231077725	0	59	G	A	0.856	-2.225537	1.036932	0.0363621	0.02797175	0.03576498
2	2_231678693_C_CTTTTTTTTTTT	231678693	0	59	CTTTTTTTTTTT	C	0.042	-2.783937	1.217248	0.02613633	0.01951337	0.02641621
2	2_231683487_CTT_C	231683487	0	59	C	CTT	0.186	-1.828335	0.8879158	0.04431786	0.03470291	0.04300464
2	2_231940295_CT_C	231940295	0	59	C	CT	0.068	3.438002	1.360115	0.01443889	0.01020959	0.01554828
2	2_232458443_T_C	232458443	0	59	C	T	0.924	2.609718	1.185534	0.03200853	0.02434093	0.03179363
2	2_233198740_A_C	233198740	0	59	C	A	0.017	-5.730764	2.596084	0.03155072	0.02396154	0.03137539
2	2_233408325_C_A	233408325	0	59	A	C	0.017	5.855472	2.567479	0.02654174	0.0198438	0.02678851
2	2_233741096_G_C	233741096	0	59	C	G	0.034	-3.825789	1.894123	0.04837556	0.038178	0.04669303
2	2_233744133_C_G	233744133	0	59	G	C	0.331	1.647769	0.7127006	0.02461926	0.01828094	0.02502129
2	2_233835088_T_C	233835088	0	59	C	T	0.093	-2.545111	1.210677	0.04021225	0.03121479	0.03927055
2	2_234255548_T_C	234255548	0	59	C	T	0.102	-2.469198	1.157123	0.03740841	0.02885023	0.03671813
2	2_234526794_T_G	234526794	0	59	G	T	0.042	4.142845	1.658976	0.0155974	0.01110749	0.01664057
2	2_234746303_GA_G	234746303	0	59	G	GA	0.025	4.579327	2.302212	0.05176638	0.04110141	0.04977475
2	2_234967410_G_A	234967410	0	59	A	G	0.127	-2.084847	1.008143	0.04344357	0.03395767	0.04220971
2	2_234978658_C_T	234978658	0	59	T	C	0.051	-3.783245	1.56304	0.01889528	0.01369533	0.01972566
2	2_236682914_T_C	236682914	0	59	C	T	0.254	1.943572	0.8716805	0.02994795	0.02263718	0.02990999
2	2_236685532_G_A	236685532	0	59	A	G	0.263	1.866554	0.8240142	0.0275354	0.02065558	0.02770026
2	2_236685731_G_C	236685731	0	59	C	G	0.263	1.866554	0.8240142	0.0275354	0.02065558	0.02770026
2	2_236691982_A_G	236691982	0	59	G	A	0.263	1.866554	0.8240142	0.0275354	0.02065558	0.02770026
2	2_236716006_T_A	236716006	0	59	A	T	0.271	-2.472252	0.8181572	0.003836847	0.002397363	0.005080418
2	2_237105055_C_T	237105055	0	59	T	C	0.068	2.83504	1.375648	0.04414487	0.03455535	0.04284736
2	2_237349715_C_G	237349715	0	59	G	C	0.017	5.379311	2.586676	0.04232214	0.03300367	0.04118989
2	2_237402565_G_A	237402565	0	59	A	G	0.017	6.408172	2.548234	0.01492202	0.01058328	0.01600442
2	2_237405766_CAAA_C	237405766	0	59	C	CAAA	0.034	4.446193	2.183334	0.04662418	0.03667486	0.0451012
2	2_238005446_AT_A	238005446	0	59	A	AT	0.051	3.980072	1.529561	0.01193379	0.008290955	0.0131661
2	2_238243369_G_A	238243369	0	59	A	G	0.017	-5.570462	2.579335	0.03525833	0.02704741	0.03475901
2	2_238243464_C_G	238243464	0	59	G	C	0.797	1.580742	0.7607828	0.04249804	0.03315317	0.04134987
2	2_238253065_C_T	238253065	0	59	T	C	0.102	2.878705	1.183329	0.01832915	0.01324797	0.01919824
2	2_238503561_C_A	238503561	0	59	A	C	0.051	3.200239	1.549755	0.04373838	0.03420882	0.04247777
2	2_238659963_TAA_TA	238659963	0	59	TA	TAA	0.059	3.114229	1.432526	0.03411201	0.02609013	0.03371365
2	2_238732864_G_A	238732864	0	59	A	G	0.034	4.201959	1.876659	0.02929322	0.02209796	0.02931081
2	2_238820380_G_A	238820380	0	59	A	G	0.017	-5.730764	2.596084	0.03155072	0.02396154	0.03137539
2	2_238903399_G_A	238903399	0	59	A	G	0.161	-2.031697	0.8613796	0.02199019	0.01616136	0.02259627
2	2_239039981_A_G	239039981	0	59	G	A	0.034	-3.644812	1.871725	0.05670665	0.04538997	0.0542654
2	2_239092788_C_T	239092788	0	59	T	C	0.017	5.032953	2.585781	0.05681792	0.04548695	0.05436657
2	2_239133980_C_T	239133980	0	59	T	C	0.288	-1.70865	0.7503732	0.0267683	0.02002865	0.02699648
2	2_239134056_A_G	239134056	0	59	G	A	0.364	-1.813756	0.696917	0.01192019	0.008280632	0.01315308
2	2_239134063_G_T	239134063	0	59	T	G	0.288	-1.70865	0.7503732	0.0267683	0.02002865	0.02699648
2	2_239134138_A_C	239134138	0	59	C	A	0.288	-1.70865	0.7503732	0.0267683	0.02002865	0.02699648
2	2_239149377_G_C	239149377	0	59	C	G	0.288	-1.514897	0.7600401	0.05130442	0.04070213	0.0493549
2	2_240003870_G_A	240003870	0	59	A	G	0.559	2.100991	0.6904976	0.003615992	0.002246771	0.004842299
2	2_240036959_C_T	240036959	0	59	T	C	0.068	-3.438123	1.364816	0.01475808	0.01045635	0.01584974
2	2_240500173_T_C	240500173	0	59	C	T	0.551	1.668287	0.7067788	0.02189645	0.01608619	0.02250961
2	2_240500437_C_T	240500437	0	59	T	C	0.551	1.668287	0.7067788	0.02189645	0.01608619	0.02250961
2	2_240900607_TG_T	240900607	0	59	T	TG	0.347	-1.65608	0.7639884	0.03461042	0.02650601	0.03416824
2	2_240921463_C_T	240921463	0	59	T	C	0.347	-1.65608	0.7639884	0.03461042	0.02650601	0.03416824
2	2_240954110_A_G	240954110	0	59	G	A	0.347	-1.65608	0.7639884	0.03461042	0.02650601	0.03416824
2	2_240969483_G_A	240969483	0	59	A	G	0.322	-1.806347	0.8689709	0.04240838	0.03307696	0.04126833
2	2_240981179_T_C	240981179	0	59	C	T	0.619	2.433329	0.635614	0.0003375505	0.0001672497	0.0008100225
2	2_240981262_A_C	240981262	0	59	C	A	0.314	1.416662	0.7156813	0.05287171	0.042058	0.05077936
2	2_240981375_T_A	240981375	0	59	A	T	0.619	2.433329	0.635614	0.0003375505	0.0001672497	0.0008100225
2	2_240981515_A_G	240981515	0	59	G	A	0.178	1.671005	0.7670908	0.0337638	0.02579989	0.03339598
2	2_240985099_G_A	240985099	0	59	A	G	0.576	2.424282	0.6441077	0.0004143579	0.0002093996	0.0009363323
2	2_240985347_G_A	240985347	0	59	A	G	0.525	2.241957	0.6183971	0.0006394194	0.0003368905	0.001279734
2	2_240985511_A_G	240985511	0	59	G	A	0.559	1.988472	0.6360457	0.00284906	0.001730827	0.003999123
2	2_241418970_TAAG_T	241418970	0	59	T	TAAG	0.017	-5.32579	2.734	0.05662269	0.04531681	0.05418907
2	2_241621799_GC_G	241621799	0	59	G	GC	0.136	-2.441735	1.102532	0.03102358	0.02352529	0.03089363
2	2_241622195_T_C	241622195	0	59	C	T	0.136	-2.441735	1.102532	0.03102358	0.02352529	0.03089363
2	2_241622318_C_T	241622318	0	59	T	C	0.085	-3.00774	1.153403	0.01176195	0.008160601	0.01300149
2	2_241627928_A_G	241627928	0	59	G	A	0.619	-1.474519	0.6667871	0.03126296	0.02372332	0.03111243
2	2_241680633_G_T	241680633	0	59	T	G	0.347	1.53854	0.692797	0.03058244	0.02316072	0.03049032
2	2_241680802_G_A	241680802	0	59	A	G	0.263	1.572815	0.760615	0.04346182	0.03397321	0.0422263
2	2_241728592_G_A	241728592	0	59	A	G	0.017	-5.609099	2.563595	0.0330179	0.02517907	0.03271528
2	2_241815473_G_A	241815473	0	59	A	G	0.508	1.273614	0.6419068	0.05233589	0.04159407	0.05029236
2	2_241827696_A_G	241827696	0	59	G	A	0.686	1.791233	0.6957105	0.01280726	0.008956144	0.01400027
2	2_241861904_G_C	241861904	0	59	C	G	0.441	1.478244	0.6211858	0.02088784	0.0152792	0.02157605
2	2_241865156_T_C	241865156	0	59	C	T	0.619	2.086888	0.6617371	0.002633251	0.001587839	0.003756364
2	2_241872597_A_G	241872597	0	59	G	A	0.585	2.229101	0.6265345	0.000788097	0.0004236289	0.001491946
2	2_241889171_G_A	241889171	0	59	A	G	0.585	2.229101	0.6265345	0.000788097	0.0004236289	0.001491946
2	2_241889937_A_G	241889937	0	59	G	A	0.593	2.228135	0.6262692	0.0007881831	0.0004236797	0.001492066
2	2_241898824_A_G	241898824	0	59	G	A	0.593	2.228135	0.6262692	0.0007881831	0.0004236797	0.001492066
2	2_241904001_G_C	241904001	0	59	C	G	0.593	2.072467	0.657154	0.002632876	0.001587592	0.003755939
2	2_242099961_C_T	242099961	0	59	T	C	0.983	-5.36392	2.595132	0.04355026	0.03404854	0.04230672
2	2_242163359_G_A	242163359	0	59	A	G	0.305	-1.602763	0.7312671	0.03272861	0.02493862	0.03245119
2	2_242179134_G_A	242179134	0	59	A	G	0.305	-1.378747	0.7083806	0.05682522	0.0454933	0.05437321
2	2_242206956_C_T	242206956	0	59	T	C	0.864	-1.784796	0.9047769	0.05366616	0.0427466	0.05150145
2	2_242617157_T_C	242617157	0	59	C	T	0.746	-2.529264	0.8217095	0.003270827	0.002013153	0.004466218
2	2_242617792_A_G	242617792	0	59	G	A	0.746	-2.529264	0.8217095	0.003270827	0.002013153	0.004466218
2	2_242630048_G_A	242630048	0	59	A	G	0.661	-2.164041	0.7426729	0.005184586	0.003332514	0.006499882
2	2_242641566_C_T	242641566	0	59	T	C	0.119	-2.447984	1.03205	0.02128765	0.01559868	0.02194634
2	2_242643998_G_A	242643998	0	59	A	G	0.153	-2.191686	0.9507978	0.02503144	0.01861513	0.02540057
2	2_242644173_A_G	242644173	0	59	G	A	0.119	-2.447984	1.03205	0.02128765	0.01559868	0.02194634
2	2_242651331_A_C	242651331	0	59	C	A	0.119	-2.447984	1.03205	0.02128765	0.01559868	0.02194634
2	2_242659067_G_A	242659067	0	59	A	G	0.11	-2.579774	1.161684	0.03058579	0.02316349	0.03049339
3	3_1339680_GGTTTTT_G	1339680	0	59	G	GGTTTTT	0.305	1.586517	0.7784362	0.04645232	0.03652763	0.04494499
3	3_1413909_A_T	1413909	0	59	T	A	0.025	5.24554	2.112882	0.01618056	0.01156178	0.01718853
3	3_1418753_G_A	1418753	0	59	A	G	0.093	2.190912	1.094848	0.05041711	0.03993609	0.04854847
3	3_1424850_T_G	1424850	0	59	G	T	0.398	1.492662	0.6687918	0.02979367	0.02251002	0.02976882
3	3_3215901_G_A	3215901	0	59	A	G	0.017	-5.328526	2.577867	0.04353916	0.03403909	0.04229662
3	3_7456675_C_T	7456675	0	59	T	C	0.737	2.008653	0.7858738	0.01343702	0.009438318	0.01459922
3	3_7620789_T_C	7620789	0	59	C	T	0.568	1.333784	0.6731086	0.05263265	0.04185096	0.05056208
3	3_8809162_C_T	8809162	0	59	T	C	0.034	-3.892742	1.848579	0.03988651	0.03093932	0.03897413
3	3_9099989_A_G	9099989	0	59	G	A	0.034	-3.75386	1.484545	0.01440598	0.01018418	0.01551718
3	3_9122875_T_G	9122875	0	59	G	T	0.025	5.373897	2.104593	0.01352436	0.00950535	0.01468214
3	3_9747101_T_A	9747101	0	59	A	T	0.017	5.160647	2.628268	0.05474412	0.04368234	0.05248129
3	3_9754334_C_T	9754334	0	59	T	C	0.136	-1.987531	0.9801796	0.04753528	0.03745622	0.04592932
3	3_9768336_C_G	9768336	0	59	G	C	0.322	1.453909	0.6577479	0.03133215	0.02378057	0.03117565
3	3_9769008_A_T	9769008	0	59	T	A	0.297	1.699337	0.6641677	0.01334632	0.009368747	0.01451308
3	3_9788168_C_T	9788168	0	59	T	C	0.153	1.983232	0.9891114	0.04997965	0.03955885	0.0481509
3	3_9834905_C_T	9834905	0	59	T	C	0.153	2.558903	1.03697	0.01679973	0.01204575	0.0177691
3	3_9965582_G_A	9965582	0	59	A	G	0.017	5.314155	2.687449	0.05311064	0.042265	0.05099652
3	3_9970121_C_T	9970121	0	59	T	C	0.042	4.408566	1.666166	0.01064966	0.007321145	0.01193147
3	3_9986104_G_A	9986104	0	59	A	G	0.025	5.413488	2.098931	0.01266057	0.00884414	0.01386047
3	3_9990741_C_T	9990741	0	59	T	C	0.034	4.937975	1.808057	0.008509145	0.005728862	0.009845789
3	3_10028220_C_T	10028220	0	59	T	C	0.025	5.413488	2.098931	0.01266057	0.00884414	0.01386047
3	3_10049013_G_A	10049013	0	59	A	G	0.034	-3.87251	1.891839	0.04554186	0.03574838	0.04411738
3	3_10103931_CT_C	10103931	0	59	C	CT	0.22	3.206895	0.8771185	0.0005810642	0.0003033462	0.001193685
3	3_10106608_T_C	10106608	0	59	C	T	0.051	3.528093	1.635703	0.03548056	0.02723331	0.03496159
3	3_10115033_G_T	10115033	0	59	T	G	0.025	3.331926	1.675657	0.05184258	0.0411673	0.049844
3	3_10157337_C_A	10157337	0	59	A	C	0.102	2.248371	1.124306	0.05056435	0.04006313	0.04868229
3	3_10157368_C_T	10157368	0	59	T	C	0.102	2.248371	1.124306	0.05056435	0.04006313	0.04868229
3	3_10188363_A_G	10188363	0	59	G	A	0.025	-4.975494	2.206973	0.02824713	0.02123863	0.0283527
3	3_10219508_T_C	10219508	0	59	C	T	0.169	2.547093	0.8464211	0.003974108	0.002491365	0.005227507
3	3_10387059_C_A	10387059	0	59	A	C	0.441	1.597056	0.6559681	0.01824116	0.01317855	0.01911619
3	3_10443827_G_C	10443827	0	59	C	G	0.22	2.256053	0.8390907	0.009520076	0.006476801	0.01083574
3	3_12571420_GT_G	12571420	0	59	G	GT	0.153	2.876884	1.064313	0.009166114	0.006214051	0.01049021
3	3_12618269_C_T	12618269	0	59	T	C	0.186	2.206837	0.8682389	0.01393329	0.009819731	0.01506988
3	3_12838340_C_T	12838340	0	59	T	C	0.017	6.418539	2.623318	0.01770178	0.01275368	0.0186128
3	3_12851841_G_A	12851841	0	59	A	G	0.051	-3.026593	1.335888	0.02750876	0.02063378	0.02767583
3	3_12942408_G_A	12942408	0	59	A	G	0.195	-1.575631	0.8026529	0.0548022	0.0437328	0.05253408
3	3_12942760_C_G	12942760	0	59	G	C	0.017	8.024695	3.59936	0.02996244	0.02264912	0.02992324
3	3_12961967_C_G	12961967	0	59	G	C	0.017	8.024695	3.59936	0.02996244	0.02264912	0.02992324
3	3_13383649_G_A	13383649	0	59	A	G	0.11	2.683678	1.170681	0.0258051	0.01924372	0.02611189
3	3_13421024_C_T	13421024	0	59	T	C	0.11	2.683678	1.170681	0.0258051	0.01924372	0.02611189
3	3_13896140_A_G	13896140	0	59	G	A	0.186	-1.786082	0.8494724	0.04017975	0.03118729	0.03924097
3	3_13896284_C_T	13896284	0	59	T	C	0.186	-1.786082	0.8494724	0.04017975	0.03118729	0.03924097
3	3_14214524_G_A	14214524	0	59	A	G	0.017	6.514181	2.536791	0.01303264	0.009128464	0.01421485
3	3_14239517_GT_G	14239517	0	59	G	GT	0.059	-3.034907	1.478559	0.04496964	0.03525931	0.04359719
3	3_14520560_G_C	14520560	0	59	C	G	0.119	2.052711	1.05796	0.05757806	0.04614984	0.05505771
3	3_14545080_T_C	14545080	0	59	C	T	0.017	8.024695	3.59936	0.02996244	0.02264912	0.02992324
3	3_15080602_TG_T	15080602	0	59	T	TG	0.025	-4.745782	2.113724	0.02887019	0.02175013	0.02892348
3	3_15292828_C_T	15292828	0	59	T	C	0.025	4.826912	2.163877	0.02987797	0.02257949	0.02984596
3	3_15900950_C_CGCCGCT	15900950	0	59	CGCCGCT	C	0.051	-3.73483	1.522281	0.01740785	0.01252263	0.01833814
3	3_16242229_G_A	16242229	0	59	A	G	0.068	2.928979	1.368161	0.03682075	0.02835656	0.03618284
3	3_16261420_C_T	16261420	0	59	T	C	0.042	-3.578624	1.6694	0.03658097	0.02815532	0.0359644
3	3_16336311_C_G	16336311	0	59	G	C	0.051	-3.556612	1.668411	0.03759517	0.02900727	0.03688823
3	3_16636093_TAA_TA	16636093	0	59	TA	TAA	0.398	-2.581301	1.031849	0.01542533	0.01097374	0.01647865
3	3_17131210_C_A	17131210	0	59	A	C	0.11	2.105099	1.038348	0.04757389	0.03748936	0.04596441
3	3_17413531_A_AAAACAAACAAACAAAC	17413531	0	59	AAAACAAACAAACAAAC	A	0.424	1.480458	0.7107487	0.04200509	0.03273436	0.04090154
3	3_21462754_A_G	21462754	0	59	G	A	0.72	-1.652893	0.6944044	0.02085766	0.0152551	0.02154808
3	3_21462880_A_G	21462880	0	59	G	A	0.288	-1.633093	0.6692545	0.01799304	0.01298297	0.01888473
3	3_24270412_TA_T	24270412	0	59	T	TA	0.051	-3.270683	1.547826	0.0392314	0.03038592	0.03837791
3	3_27182990_T_C	27182990	0	59	C	T	0.017	-5.609099	2.563595	0.0330179	0.02517907	0.03271528
3	3_27184897_T_C	27184897	0	59	C	T	0.017	-5.609099	2.563595	0.0330179	0.02517907	0.03271528
3	3_28294502_GA_G	28294502	0	59	G	GA	0.28	1.749513	0.7695731	0.02700612	0.02022285	0.02721474
3	3_28381887_A_T	28381887	0	59	T	A	0.271	1.742016	0.7531295	0.0245584	0.01823164	0.02496527
3	3_29628718_GTTT_G	29628718	0	59	G	GTTT	0.076	-2.576311	1.184676	0.03405236	0.02604039	0.03365924
3	3_29628722_T_C	29628722	0	59	C	T	0.059	2.584697	1.300614	0.0519724	0.04127958	0.049962
3	3_29628725_T_C	29628725	0	59	C	T	0.042	-3.298935	1.689175	0.05601182	0.0447848	0.05363371
3	3_30032626_C_G	30032626	0	59	G	C	0.034	4.662766	1.860437	0.01524539	0.01083401	0.01630922
3	3_32433331_G_C	32433331	0	59	C	G	0.042	-3.581409	1.680729	0.03767011	0.02907029	0.03695647
3	3_32996935_T_A	32996935	0	59	A	T	0.017	-5.079476	2.573974	0.05357695	0.04266924	0.05142037
3	3_33879770_G_A	33879770	0	59	A	G	0.432	1.311345	0.6101858	0.03612687	0.02777455	0.03555063
3	3_33887008_G_A	33887008	0	59	A	G	0.034	5.027553	1.796429	0.007100842	0.004700686	0.008448403
3	3_35780735_T_C	35780735	0	59	C	T	0.271	2.112664	0.8154049	0.01228261	0.008556083	0.01349973
3	3_36898381_G_A	36898381	0	59	A	G	0.017	5.288123	2.612949	0.04794924	0.03781166	0.04630556
3	3_37379234_C_T	37379234	0	59	T	C	0.025	5.883728	2.085046	0.006668454	0.0043886	0.008014172
3	3_38039198_A_T	38039198	0	59	T	A	0.025	-4.160292	2.122593	0.0551641	0.04404734	0.05286306
3	3_38134437_C_T	38134437	0	59	T	C	0.017	-5.730764	2.596084	0.03155072	0.02396154	0.03137539
3	3_38357817_C_T	38357817	0	59	T	C	0.076	3.749126	1.250056	0.00408832	0.002569814	0.005349403
3	3_38390048_T_G	38390048	0	59	G	T	0.017	8.074087	2.468553	0.001871286	0.0010924	0.002872687
3	3_38592406_A_G	38592406	0	59	G	A	0.314	2.235809	0.7401576	0.003847811	0.00240486	0.005092191
3	3_38748833_T_C	38748833	0	59	C	T	0.178	2.100966	0.9096717	0.02476303	0.01839745	0.02515361
3	3_38991560_AC_A	38991560	1	58	A	AC	0.043	-3.072343	1.382254	0.03044343	0.02304594	0.0303632
3	3_39142624_G_A	39142624	0	59	A	G	0.042	-4.382866	1.725607	0.01399884	0.009870208	0.01513197
3	3_39152575_C_G	39152575	0	59	G	C	0.322	1.568635	0.7296261	0.03605836	0.02771714	0.03548821
3	3_39161456_G_A	39161456	0	59	A	G	0.322	1.568635	0.7296261	0.03605836	0.02771714	0.03548821
3	3_39161464_G_A	39161464	0	59	A	G	0.322	1.568635	0.7296261	0.03605836	0.02771714	0.03548821
3	3_39166484_C_T	39166484	0	59	T	C	0.678	-1.568635	0.7296261	0.03605836	0.02771714	0.03548821
3	3_39176509_T_A	39176509	0	59	A	T	0.042	5.071338	1.951623	0.01204461	0.008375113	0.01327217
3	3_39178899_C_T	39178899	0	59	T	C	0.653	-1.661841	0.7133348	0.02359207	0.01745028	0.02407507
3	3_39179909_G_A	39179909	0	59	A	G	0.686	-1.709371	0.7433848	0.02537373	0.01889303	0.02571537
3	3_39180162_A_C	39180162	0	59	C	A	0.686	-1.709371	0.7433848	0.02537373	0.01889303	0.02571537
3	3_39180263_G_A	39180263	0	59	A	G	0.686	-1.709371	0.7433848	0.02537373	0.01889303	0.02571537
3	3_39185077_G_A	39185077	0	59	A	G	0.661	-1.790448	0.7236777	0.01653158	0.01183595	0.01751782
3	3_39307256_C_T	39307256	0	59	T	C	0.246	1.955434	0.7733951	0.01441515	0.01019125	0.01552584
3	3_40503083_G_GT	40503083	0	59	GT	G	0.042	-4.061993	1.657312	0.01751633	0.01260787	0.01843954
3	3_42218299_C_G	42218299	0	59	G	C	0.017	-5.845378	2.637383	0.03090053	0.02342355	0.03078114
3	3_42304784_A_G	42304784	0	59	G	A	0.508	-1.486609	0.7122881	0.04161464	0.03240293	0.0405464
3	3_42701123_G_A	42701123	0	59	A	G	0.017	-5.304175	2.679065	0.05282527	0.04201778	0.05073715
3	3_42738297_G_A	42738297	0	59	A	G	0.475	1.788156	0.6638306	0.009395268	0.006384051	0.01071403
3	3_42774475_G_A	42774475	0	59	A	G	0.263	1.792726	0.7494518	0.02026528	0.01478281	0.02099883
3	3_42781276_G_T	42781276	0	59	T	G	0.263	1.792726	0.7494518	0.02026528	0.01478281	0.02099883
3	3_42781316_G_A	42781316	0	59	A	G	0.263	1.792726	0.7494518	0.02026528	0.01478281	0.02099883
3	3_42799765_G_A	42799765	0	59	A	G	0.271	1.648252	0.7557579	0.03356383	0.02563333	0.03321352
3	3_44868018_G_GT	44868018	0	59	GT	G	0.085	2.611745	1.291214	0.04806737	0.03791314	0.04641293
3	3_45461102_G_GT	45461102	0	59	GT	G	0.669	-1.53142	0.6874146	0.03008119	0.02274704	0.03003188
3	3_45813025_A_G	45813025	0	59	G	A	0.644	1.517645	0.672235	0.0280358	0.02106538	0.02815903
3	3_46488936_C_T	46488936	0	59	T	C	0.076	2.574415	1.319705	0.05628415	0.04502192	0.05388129
3	3_46490366_G_A	46490366	0	59	A	G	0.076	-2.858998	1.294665	0.03148971	0.02391102	0.03131964
3	3_46497723_C_G	46497723	0	59	G	C	0.076	-2.858998	1.294665	0.03148971	0.02391102	0.03131964
3	3_46501100_C_A	46501100	0	59	A	C	0.076	-2.858998	1.294665	0.03148971	0.02391102	0.03131964
3	3_46747255_C_T	46747255	0	59	T	C	0.076	-3.122686	1.283941	0.01835675	0.01326975	0.01922397
3	3_46755937_C_T	46755937	0	59	T	C	0.136	-2.195686	0.9781084	0.02889713	0.02177226	0.02894815
3	3_46759010_T_G	46759010	0	59	G	T	0.119	-2.026103	1.006047	0.04901103	0.03872456	0.04727058
3	3_46777881_C_G	46777881	0	59	G	C	0.136	-2.057418	0.9734231	0.03918592	0.03034753	0.03833652
3	3_46777885_T_C	46777885	0	59	C	T	0.136	-2.057418	0.9734231	0.03918592	0.03034753	0.03833652
3	3_46875258_A_G	46875258	0	59	G	A	0.025	-4.361081	2.19306	0.05182514	0.04115222	0.04982815
3	3_46902129_T_G	46902129	0	59	G	T	0.136	-2.061486	0.9278843	0.03051498	0.02310502	0.03042863
3	3_46904708_C_A	46904708	0	59	A	C	0.127	-2.058719	0.9268756	0.03055568	0.02313863	0.03046585
3	3_47047776_G_A	47047776	0	59	A	G	0.017	5.267511	2.582264	0.04626653	0.0363685	0.04477611
3	3_47651536_G_A	47651536	0	59	A	G	0.017	-5.304175	2.679065	0.05282527	0.04201778	0.05073715
3	3_47722034_C_CT	47722034	0	59	CT	C	0.178	2.010137	1.000987	0.04963993	0.03926608	0.04784215
3	3_47894884_G_T	47894884	0	59	T	G	0.017	-8.092446	3.690059	0.03263131	0.02485779	0.03236236
3	3_48456769_G_A	48456769	0	59	A	G	0.017	-8.092446	3.690059	0.03263131	0.02485779	0.03236236
3	3_48506218_C_A	48506218	0	59	A	C	0.017	-8.092446	3.690059	0.03263131	0.02485779	0.03236236
3	3_48506222_T_C	48506222	0	59	C	T	0.017	-8.092446	3.690059	0.03263131	0.02485779	0.03236236
3	3_48509036_T_C	48509036	0	59	C	T	0.017	-8.092446	3.690059	0.03263131	0.02485779	0.03236236
3	3_48510441_G_A	48510441	0	59	A	G	0.017	-8.092446	3.690059	0.03263131	0.02485779	0.03236236
3	3_48511078_T_C	48511078	0	59	C	T	0.017	-8.092446	3.690059	0.03263131	0.02485779	0.03236236
3	3_48514466_CT_C	48514466	0	59	C	CT	0.017	-8.092446	3.690059	0.03263131	0.02485779	0.03236236
3	3_48573901_C_G	48573901	0	59	G	C	0.017	-5.874691	2.61302	0.02866509	0.02158164	0.02873563
3	3_48669583_G_C	48669583	0	59	C	G	0.017	-5.874691	2.61302	0.02866509	0.02158164	0.02873563
3	3_48716536_G_A	48716536	0	59	A	G	0.025	-5.328951	2.103289	0.01422405	0.01004378	0.01534513
3	3_48716537_C_A	48716537	0	59	A	C	0.025	-5.328951	2.103289	0.01422405	0.01004378	0.01534513
3	3_48731961_A_G	48731961	0	59	G	A	0.068	-3.328352	1.370338	0.01850562	0.01338729	0.01936273
3	3_49051613_C_T	49051613	0	59	T	C	0.025	-5.328951	2.103289	0.01422405	0.01004378	0.01534513
3	3_49148448_G_A	49148448	0	59	A	G	0.025	5.209692	2.077819	0.01520634	0.01080371	0.01627244
3	3_49372852_A_G	49372852	0	59	G	A	0.025	-5.328951	2.103289	0.01422405	0.01004378	0.01534513
3	3_49395673_GGCCGCC_G	49395673	0	59	G	GGCCGCC	0.475	-1.423766	0.7050263	0.04841524	0.03821211	0.0467291
3	3_49691675_A_G	49691675	0	59	G	A	0.025	-5.328951	2.103289	0.01422405	0.01004378	0.01534513
3	3_49698115_G_A	49698115	0	59	A	G	0.025	-5.328951	2.103289	0.01422405	0.01004378	0.01534513
3	3_49701298_G_A	49701298	0	59	A	G	0.542	-1.711035	0.6415908	0.01008222	0.006895911	0.01138228
3	3_49720393_C_G	49720393	0	59	G	C	0.542	-1.711035	0.6415908	0.01008222	0.006895911	0.01138228
3	3_49723784_C_A	49723784	0	59	A	C	0.407	-2.090791	1.022608	0.04578544	0.03595673	0.04433881
3	3_49723916_T_G	49723916	0	59	G	T	0.051	4.746111	1.489098	0.002389197	0.001427462	0.003478253
3	3_49726178_G_A	49726178	0	59	A	G	0.059	2.824537	1.442306	0.05536318	0.04422044	0.05304404
3	3_50212489_T_A	50212489	0	59	A	T	0.059	5.111054	1.460588	0.0009428915	0.0005156101	0.001704389
3	3_50255663_C_T	50255663	0	59	T	C	0.356	1.542954	0.6750231	0.02621738	0.01957939	0.02649066
3	3_50255666_C_T	50255666	0	59	T	C	0.356	1.542954	0.6750231	0.02621738	0.01957939	0.02649066
3	3_50255682_A_C	50255682	0	59	C	A	0.017	-5.609099	2.563595	0.0330179	0.02517907	0.03271528
3	3_50293604_CTCCCA_CCCCA	50293604	0	59	CCCCA	CTCCCA	0.017	-6.290435	2.525101	0.01583771	0.01129452	0.01686652
3	3_50293608_CA_C	50293608	0	59	C	CA	0.017	-5.344454	2.563081	0.04179574	0.03255662	0.04071112
3	3_50332697_G_A	50332697	0	59	A	G	0.466	1.373278	0.6392714	0.03620166	0.02783723	0.03561879
3	3_50402263_C_T	50402263	0	59	T	C	0.025	-5.328951	2.103289	0.01422405	0.01004378	0.01534513
3	3_50405393_T_A	50405393	0	59	A	T	0.025	6.407259	2.617943	0.01767029	0.01272892	0.01858339
3	3_51266880_TA_T	51266880	0	59	T	TA	0.28	-2.326979	0.9508764	0.01768114	0.01273745	0.01859353
3	3_52264907_T_C	52264907	0	59	C	T	0.263	2.36428	0.7027818	0.001418296	0.0008064051	0.002320056
3	3_52266191_G_A	52266191	0	59	A	G	0.042	4.053634	1.654068	0.01752712	0.01261635	0.01844962
3	3_52279951_T_G	52279951	0	59	G	T	0.153	3.05135	0.9616739	0.002490248	0.001493689	0.003593898
3	3_52293312_C_G	52293312	0	59	G	C	0.144	3.048494	0.9617014	0.002512426	0.001508258	0.003619183
3	3_52293859_A_G	52293859	0	59	G	A	0.144	3.048494	0.9617014	0.002512426	0.001508258	0.003619183
3	3_52325039_G_A	52325039	0	59	A	G	0.144	3.048494	0.9617014	0.002512426	0.001508258	0.003619183
3	3_52383120_G_A	52383120	0	59	A	G	0.178	3.154283	0.8278174	0.0003574206	0.0001780735	0.0008432946
3	3_52384594_A_G	52384594	0	59	G	A	0.025	5.531998	2.107094	0.0112342	0.007761354	0.0124948
3	3_52387078_T_C	52387078	0	59	C	T	0.195	3.064753	0.8306738	0.0005235945	0.0002706238	0.001107096
3	3_52390555_C_T	52390555	0	59	T	C	0.195	3.064753	0.8306738	0.0005235945	0.0002706238	0.001107096
3	3_52391735_A_C	52391735	0	59	C	A	0.186	3.155811	0.8276859	0.000354643	0.0001765569	0.0008386705
3	3_52396944_G_A	52396944	0	59	A	G	0.127	2.985354	0.9781398	0.003521443	0.002182562	0.004739781
3	3_52400740_G_C	52400740	0	59	C	G	0.186	3.155811	0.8276859	0.000354643	0.0001765569	0.0008386705
3	3_52404111_G_A	52404111	0	59	A	G	0.127	2.985354	0.9781398	0.003521443	0.002182562	0.004739781
3	3_52409421_A_G	52409421	0	59	G	A	0.127	2.985354	0.9781398	0.003521443	0.002182562	0.004739781
3	3_52417638_T_C	52417638	0	59	C	T	0.195	3.064753	0.8306738	0.0005235945	0.0002706238	0.001107096
3	3_52420414_G_A	52420414	0	59	A	G	0.127	2.985354	0.9781398	0.003521443	0.002182562	0.004739781
3	3_52420901_G_A	52420901	0	59	A	G	0.136	3.045524	0.961714	0.002535292	0.001523291	0.003645218
3	3_52428988_C_A	52428988	0	59	A	C	0.127	2.985354	0.9781398	0.003521443	0.002182562	0.004739781
3	3_52430526_G_A	52430526	0	59	A	G	0.144	-1.966744	0.9637001	0.04616909	0.03628507	0.04468754
3	3_52431671_G_A	52431671	0	59	A	G	0.178	3.075091	0.8367084	0.0005474899	0.0002841899	0.001143339
3	3_52432214_G_A	52432214	0	59	A	G	0.136	3.045524	0.961714	0.002535292	0.001523291	0.003645218
3	3_52454262_T_G	52454262	0	59	G	T	0.127	2.985354	0.9781398	0.003521443	0.002182562	0.004739781
3	3_52471942_G_A	52471942	0	59	A	G	0.814	-3.007101	0.8353269	0.0006920912	0.0003674203	0.001355978
3	3_52489627_G_T	52489627	0	59	T	G	0.119	3.308471	0.9718676	0.001257704	0.0007069506	0.002117097
3	3_52491836_G_A	52491836	0	59	A	G	0.153	-2.109115	0.9361492	0.02834593	0.02131968	0.02844324
3	3_52519854_G_C	52519854	0	59	C	G	0.119	3.308471	0.9718676	0.001257704	0.0007069506	0.002117097
3	3_52523405_C_T	52523405	0	59	T	C	0.78	-2.827264	0.8510945	0.001608627	0.0009256565	0.002555442
3	3_52536308_A_C	52536308	0	59	C	A	0.847	-2.903921	0.9034806	0.002209194	0.001310149	0.003270375
3	3_52552916_A_G	52552916	0	59	G	A	0.119	3.221952	0.9591124	0.001439081	0.000819358	0.002346017
3	3_52552922_C_CCCCGCCCCGCCCCGT	52552922	0	59	CCCCGCCCCGCCCCGT	C	0.398	2.192187	0.7493182	0.00501927	0.003216451	0.006328405
3	3_52804630_T_TG	52804630	0	59	TG	T	0.034	4.660578	1.81259	0.01292138	0.009043362	0.01410895
3	3_52818301_G_A	52818301	0	59	A	G	0.051	3.955337	1.516006	0.01172118	0.008129699	0.01296241
3	3_52829607_T_C	52829607	0	59	C	T	0.059	2.987653	1.465895	0.04644962	0.03652531	0.04494254
3	3_52847473_C_T	52847473	0	59	T	C	0.017	5.267511	2.582264	0.04626653	0.0363685	0.04477611
3	3_53213538_C_G	53213538	0	59	G	C	0.907	-2.542709	1.212631	0.04070505	0.0316319	0.03971893
3	3_53213815_C_CGT	53213815	0	59	CGT	C	0.195	-2.499495	1.001929	0.01569787	0.01118565	0.01673506
3	3_53857856_C_T	53857856	0	59	T	C	0.017	5.0824	2.613999	0.05707625	0.04571214	0.05460144
3	3_54919351_A_G	54919351	0	59	G	A	0.178	-2.142562	0.9004241	0.02089856	0.01528775	0.02158598
3	3_55107944_A_G	55107944	0	59	G	A	0.102	-2.422507	1.167212	0.04272079	0.03334256	0.04155245
3	3_55108149_A_G	55108149	0	59	G	A	0.102	-2.422507	1.167212	0.04272079	0.03334256	0.04155245
3	3_55108188_A_G	55108188	0	59	G	A	0.136	-2.514339	1.049415	0.02007224	0.01462917	0.02081969
3	3_55108234_CACTGACTGAGATGTTCTCTT_C	55108234	0	59	C	CACTGACTGAGATGTTCTCTT	0.186	-1.890433	0.9156048	0.04376934	0.03423521	0.04250592
3	3_56605404_TA_T	56605404	0	59	T	TA	0.449	1.277322	0.5630799	0.02732281	0.02048168	0.02750528
3	3_57108101_C_T	57108101	0	59	T	C	0.025	4.23728	2.124479	0.05115552	0.04057351	0.04921957
3	3_57108501_G_A	57108501	0	59	A	G	0.025	4.23728	2.124479	0.05115552	0.04057351	0.04921957
3	3_57176575_G_A	57176575	0	59	A	G	0.025	4.23728	2.124479	0.05115552	0.04057351	0.04921957
3	3_57419299_G_T	57419299	0	59	T	G	0.017	5.855472	2.567479	0.02654174	0.0198438	0.02678851
3	3_57528615_T_TA	57528615	0	59	TA	T	0.017	5.788677	2.578016	0.02885811	0.0217402	0.02891242
3	3_58109430_TAA_TA	58109430	0	59	TA	TAA	0.381	1.981631	0.9658099	0.04505323	0.03533072	0.04367318
3	3_58296209_CT_C	58296209	0	59	C	CT	0.381	-2.593304	0.8548222	0.003709049	0.002310122	0.004942856
3	3_62647928_A_G	62647928	0	59	G	A	0.754	2.084506	0.7757013	0.009556128	0.006503613	0.01087087
3	3_64184397_G_T	64184397	0	59	T	G	0.127	2.358371	0.9705096	0.01845155	0.01334459	0.01931234
3	3_64547477_G_C	64547477	0	59	C	G	0.11	3.210272	1.096952	0.005005908	0.003207086	0.006314517
3	3_64554254_T_C	64554254	0	59	C	T	0.458	-1.529908	0.6380979	0.01999031	0.014564	0.02074363
3	3_69036678_G_C	69036678	0	59	C	G	0.237	-1.862337	0.8937327	0.04192751	0.03266848	0.04083098
3	3_69054266_A_AT	69054266	0	59	AT	A	0.22	-2.252228	0.9290568	0.01871984	0.01355657	0.01956231
3	3_69054341_T_C	69054341	0	59	C	T	0.22	-2.252228	0.9290568	0.01871984	0.01355657	0.01956231
3	3_69058783_C_T	69058783	0	59	T	C	0.186	-2.528935	0.9571832	0.01075788	0.007402482	0.01203594
3	3_69059023_A_C	69059023	0	59	C	A	0.169	1.722031	0.8718944	0.05338453	0.04250239	0.05124547
3	3_69074878_A_G	69074878	0	59	G	A	0.059	-2.921396	1.467829	0.05163199	0.04098522	0.04965261
3	3_69077197_A_G	69077197	0	59	G	A	0.161	1.923653	0.8746028	0.03214649	0.02445534	0.03191963
3	3_69082657_T_C	69082657	0	59	C	T	0.331	-1.730917	0.8241602	0.04039542	0.03136977	0.03943721
3	3_69082873_G_T	69082873	0	59	T	G	0.186	-2.528935	0.9571832	0.01075788	0.007402482	0.01203594
3	3_69084161_C_A	69084161	0	59	A	C	0.186	-2.528935	0.9571832	0.01075788	0.007402482	0.01203594
3	3_69151152_C_A	69151152	0	59	A	C	0.034	4.14504	1.871453	0.03100778	0.02351223	0.03087919
3	3_72799703_C_T	72799703	0	59	T	C	0.212	2.221942	0.836513	0.01036791	0.007109743	0.01165909
3	3_73111503_T_TTGG	73111503	0	59	TTGG	T	0.051	-3.376841	1.543727	0.03305795	0.02521238	0.03275184
3	3_73434086_A_G	73434086	0	59	G	A	0.271	1.92984	0.7418601	0.01195689	0.008308495	0.01318822
3	3_74334458_G_A	74334458	0	59	A	G	0.017	6.258524	2.526432	0.01640259	0.01173514	0.01739686
3	3_77526539_C_G	77526539	0	59	G	C	0.068	-2.954296	1.431863	0.04390985	0.03435497	0.04263368
3	3_78796078_C_A	78796078	0	59	A	C	0.576	-1.305062	0.648136	0.04905036	0.03875841	0.04730632
3	3_81627277_G_GA	81627277	0	59	GA	G	0.051	3.873294	1.522138	0.01383064	0.009740741	0.01497263
3	3_81698119_C_T	81698119	0	59	T	C	0.025	5.342386	2.106434	0.01413045	0.009971609	0.01525657
3	3_96962733_A_G	96962733	0	59	G	A	0.025	-5.671721	2.120027	0.009861266	0.006730916	0.01116777
3	3_96963004_C_T	96963004	0	59	T	C	0.025	-5.671721	2.120027	0.009861266	0.006730916	0.01116777
3	3_97194242_C_T	97194242	0	59	T	C	0.042	-3.974474	1.650333	0.01947126	0.0141517	0.02026145
3	3_97194317_T_G	97194317	0	59	G	T	0.042	-3.974474	1.650333	0.01947126	0.0141517	0.02026145
3	3_97194366_T_C	97194366	0	59	C	T	0.042	-3.974474	1.650333	0.01947126	0.0141517	0.02026145
3	3_97727727_G_C	97727727	0	59	C	G	0.814	-1.98427	0.9732482	0.04637687	0.036463	0.04487641
3	3_97727753_G_A	97727753	0	59	A	G	0.814	-1.98427	0.9732482	0.04637687	0.036463	0.04487641
3	3_98225660_T_G	98225660	0	59	G	T	0.136	1.921689	0.99098	0.0577118	0.04626654	0.05517931
3	3_98240317_T_TA	98240317	0	59	TA	T	0.136	1.921689	0.99098	0.0577118	0.04626654	0.05517931
3	3_98518160_T_TA	98518160	0	59	TA	T	0.72	-2.042724	0.9535345	0.0366983	0.02825378	0.03607129
3	3_100009610_G_GT	100009610	0	59	GT	G	0.042	3.769455	1.67917	0.02889687	0.02177204	0.0289479
3	3_100558416_T_C	100558416	0	59	C	T	0.212	-2.393218	0.878631	0.008675633	0.005851504	0.0100095
3	3_100558905_A_G	100558905	0	59	G	A	0.102	-2.298651	1.163875	0.05338985	0.04250701	0.0512503
3	3_100948150_A_C	100948150	0	59	C	A	0.432	3.085653	1.437696	0.03636389	0.02797325	0.03576661
3	3_101083864_GTTTATTTA_GTTTATTTATTTA	101083864	0	59	GTTTATTTATTTA	GTTTATTTA	0.042	3.842382	1.660916	0.02453624	0.01821369	0.02494487
3	3_101370551_T_C	101370551	0	59	C	T	0.144	-2.098593	1.04236	0.04907774	0.03878198	0.04733121
3	3_101373480_A_G	101373480	0	59	G	A	0.144	-2.098593	1.04236	0.04907774	0.03878198	0.04733121
3	3_101378927_G_A	101378927	0	59	A	G	0.034	-5.228369	1.78917	0.005065913	0.003249162	0.006376852
3	3_101404813_A_G	101404813	0	59	G	A	0.373	1.367644	0.6784384	0.0488006	0.03854351	0.04707933
3	3_101575884_T_C	101575884	0	59	C	T	0.017	6.325446	2.54629	0.01611826	0.01151318	0.01713004
3	3_105238901_T_C	105238901	0	59	C	T	0.322	1.706725	0.7615739	0.02915623	0.02198527	0.02918539
3	3_108179219_CAA_C	108179219	0	59	C	CAA	0.119	2.241663	1.141304	0.05467162	0.04361935	0.05241538
3	3_110611002_G_A	110611002	0	59	A	G	0.034	4.431826	1.849493	0.02005769	0.01461759	0.02080618
3	3_110611948_C_T	110611948	0	59	T	C	0.034	4.431826	1.849493	0.02005769	0.01461759	0.02080618
3	3_111710201_AT_A	111710201	0	59	A	AT	0.415	1.424342	0.6520777	0.03330069	0.0254143	0.03297339
3	3_112714150_A_AC	112714150	0	59	AC	A	0.042	-4.126764	1.651018	0.01550733	0.01103746	0.01655582
3	3_112718352_G_T	112718352	0	59	T	G	0.042	-4.126764	1.651018	0.01550733	0.01103746	0.01655582
3	3_112724619_A_G	112724619	0	59	G	A	0.042	-4.126764	1.651018	0.01550733	0.01103746	0.01655582
3	3_112732299_TTTTTTTTTTG_GTTTTTTTTTG	112732299	0	59	GTTTTTTTTTG	TTTTTTTTTTG	0.042	-4.126764	1.651018	0.01550733	0.01103746	0.01655582
3	3_112999560_G_A	112999560	0	59	A	G	0.017	5.160647	2.628268	0.05474412	0.04368234	0.05248129
3	3_113135513_G_T	113135513	0	59	T	G	0.017	5.160647	2.628268	0.05474412	0.04368234	0.05248129
3	3_113251875_G_A	113251875	0	59	A	G	0.051	4.365363	1.496268	0.005132628	0.003295998	0.006446056
3	3_113251935_G_A	113251935	0	59	A	G	0.025	4.616262	2.102956	0.03247271	0.02472608	0.03221755
3	3_113375077_T_C	113375077	0	59	C	T	0.051	4.040238	1.505025	0.009625689	0.006555372	0.01093862
3	3_113588445_T_C	113588445	0	59	C	T	0.144	-2.19174	1.004967	0.03356517	0.02563446	0.03321475
3	3_113955164_T_G	113955164	0	59	G	T	0.551	-1.618288	0.7217591	0.02908095	0.02192337	0.02911647
3	3_113955187_A_C	113955187	0	59	C	A	0.212	-2.289691	0.8103627	0.006602866	0.00434142	0.00794806
3	3_113955265_G_A	113955265	0	59	A	G	0.559	-1.680876	0.7029772	0.02031349	0.0148212	0.02104355
3	3_113955320_C_T	113955320	0	59	T	C	0.559	-1.680876	0.7029772	0.02031349	0.0148212	0.02104355
3	3_114026673_A_G	114026673	0	59	G	A	0.356	-1.421775	0.6593441	0.03552805	0.02727305	0.03500487
3	3_119196334_G_T	119196334	0	59	T	G	0.542	-1.365832	0.6185389	0.03149952	0.02391914	0.0313286
3	3_119256056_T_C	119256056	0	59	C	T	0.025	-6.102448	2.030555	0.004018379	0.00252175	0.005274809
3	3_119263770_T_C	119263770	0	59	C	T	0.119	3.929593	0.8993594	5.699103e-05	2.37698e-05	0.000247025
3	3_120067986_C_G	120067986	0	59	G	C	0.017	-6.699674	2.516406	0.01020092	0.00698469	0.01149737
3	3_120371414_G_A	120371414	0	59	A	G	0.898	2.464549	1.208995	0.04640811	0.03648976	0.04490481
3	3_120389316_T_A	120389316	0	59	A	T	0.686	-2.193578	0.7212064	0.003628092	0.002255001	0.004855394
3	3_120389429_G_A	120389429	0	59	A	G	0.042	-3.901594	1.679702	0.02398787	0.01776998	0.02443985
3	3_120394604_T_A	120394604	0	59	A	T	0.153	-2.223566	0.9369849	0.02122818	0.01555112	0.02189128
3	3_120428621_T_C	120428621	0	59	C	T	0.373	1.496321	0.6667611	0.02894262	0.02180965	0.02898981
3	3_121251868_A_C	121251868	0	59	C	A	0.017	6.325446	2.54629	0.01611826	0.01151318	0.01713004
3	3_121415370_T_C	121415370	0	59	C	T	0.042	-3.787974	1.651455	0.02572415	0.01917788	0.0260375
3	3_122259606_T_C	122259606	0	59	C	T	0.534	-1.415942	0.6398613	0.03115265	0.02363205	0.0310116
3	3_122269380_A_G	122269380	0	59	G	A	0.568	-1.498868	0.6483227	0.0246247	0.01828535	0.0250263
3	3_122288210_G_A	122288210	0	59	A	G	0.542	-1.360083	0.6686568	0.04687087	0.0368863	0.04532543
3	3_122418750_G_A	122418750	0	59	A	G	0.254	1.517523	0.7216292	0.04014919	0.03116145	0.03921317
3	3_122811187_G_GT	122811187	0	59	GT	G	0.169	2.265291	0.9883247	0.02582706	0.0192616	0.02613207
3	3_122835198_A_T	122835198	0	59	T	A	0.017	-5.268731	2.661998	0.05289715	0.04208004	0.05080248
3	3_123385217_G_A	123385217	0	59	A	G	0.025	5.929786	2.116406	0.007040153	0.004656774	0.008387619
3	3_124215143_C_G	124215143	0	59	G	C	0.034	3.735124	1.852108	0.04871238	0.03846762	0.04699916
3	3_124351229_C_G	124351229	0	59	G	C	0.042	3.622129	1.746096	0.04282171	0.03342839	0.04164422
3	3_124351316_G_A	124351316	0	59	A	G	0.475	1.32929	0.6498123	0.04567467	0.03586196	0.04423811
3	3_124351424_T_C	124351424	0	59	C	T	0.475	1.32929	0.6498123	0.04567467	0.03586196	0.04423811
3	3_124646693_G_A	124646693	0	59	A	G	0.017	-5.874691	2.61302	0.02866509	0.02158164	0.02873563
3	3_124896668_G_A	124896668	0	59	A	G	0.085	2.477485	1.247941	0.05220432	0.04148021	0.05017278
3	3_125238813_G_C	125238813	0	59	C	G	0.017	-6.699674	2.516406	0.01020092	0.00698469	0.01149737
3	3_125249340_G_A	125249340	0	59	A	G	0.102	2.278839	1.171467	0.05695458	0.04560607	0.05449082
3	3_125266387_G_A	125266387	0	59	A	G	0.102	2.278839	1.171467	0.05695458	0.04560607	0.05449082
3	3_126062749_T_C	126062749	0	59	C	T	0.017	5.776353	2.571729	0.02881062	0.02170118	0.02886892
3	3_126181071_A_C	126181071	0	59	C	A	0.22	-2.081105	0.6751444	0.003230001	0.001985667	0.004421388
3	3_126184941_C_T	126184941	0	59	T	C	0.568	1.783864	0.6724257	0.01045822	0.007177443	0.01174645
3	3_126185238_C_T	126185238	0	59	T	C	0.619	1.497178	0.6446169	0.02399971	0.01777955	0.02445076
3	3_126189919_A_G	126189919	0	59	G	A	0.619	1.497178	0.6446169	0.02399971	0.01777955	0.02445076
3	3_126194076_T_C	126194076	0	59	C	T	0.619	1.497178	0.6446169	0.02399971	0.01777955	0.02445076
3	3_126202147_G_A	126202147	0	59	A	G	0.212	-1.961621	0.6812747	0.005701209	0.003697386	0.007031857
3	3_126202257_G_A	126202257	0	59	A	G	0.466	1.544405	0.6473018	0.02057288	0.0150279	0.02128413
3	3_126208249_A_C	126208249	0	59	C	A	0.525	1.480777	0.7470512	0.05255972	0.04178782	0.05049579
3	3_126224480_AAGGG_AAGGGAGGG	126224480	0	59	AAGGGAGGG	AAGGG	0.246	1.870533	0.7417856	0.01466291	0.01038272	0.0157599
3	3_127292333_G_A	127292333	0	59	A	G	0.102	-2.982285	1.158586	0.01282727	0.00897143	0.01401933
3	3_127336934_A_G	127336934	0	59	G	A	0.788	1.561144	0.7604523	0.04493921	0.03523332	0.04356953
3	3_127387446_C_T	127387446	0	59	T	C	0.034	3.804578	1.854124	0.04503582	0.03531585	0.04365736
3	3_127441239_T_A	127441239	0	59	A	T	0.017	-5.992668	2.539223	0.02191615	0.01610198	0.02252782
3	3_128720487_A_G	128720487	0	59	G	A	0.602	-1.484897	0.7124633	0.04188972	0.03263639	0.0407966
3	3_128755953_G_A	128755953	0	59	A	G	0.458	-1.468365	0.7038014	0.04168577	0.03246329	0.0406111
3	3_128755971_G_A	128755971	0	59	A	G	0.458	-1.468365	0.7038014	0.04168577	0.03246329	0.0406111
3	3_128781258_A_AT	128781258	0	59	AT	A	0.619	-1.969135	0.7275857	0.009085236	0.006154144	0.0104111
3	3_128853622_C_G	128853622	0	59	G	C	0.983	-6.711148	2.559733	0.0113397	0.007841038	0.01259624
3	3_128859202_C_CTTAG	128859202	0	59	CTTAG	C	0.983	-6.711148	2.559733	0.0113397	0.007841038	0.01259624
3	3_128864540_A_G	128864540	0	59	G	A	0.983	-6.711148	2.559733	0.0113397	0.007841038	0.01259624
3	3_128976729_C_G	128976729	0	59	G	C	0.017	6.711148	2.559733	0.0113397	0.007841038	0.01259624
3	3_129308157_A_C	129308157	0	59	C	A	0.127	2.329671	1.094785	0.03792055	0.02928101	0.03718453
3	3_129308163_A_C	129308163	0	59	C	A	0.085	3.062759	1.297709	0.02191139	0.01609817	0.02252342
3	3_129324104_T_TTG	129324104	0	59	TTG	T	0.034	4.955863	1.801571	0.008072591	0.005408335	0.009415121
3	3_129390129_C_G	129390129	0	59	G	C	0.051	-3.937088	1.658889	0.02121675	0.01554198	0.02188069
3	3_129546664_C_T	129546664	0	59	T	C	0.051	-3.937088	1.658889	0.02121675	0.01554198	0.02188069
3	3_130158465_A_G	130158465	0	59	G	A	0.017	-5.570462	2.579335	0.03525833	0.02704741	0.03475901
3	3_130346185_A_G	130346185	0	59	G	A	0.017	6.258524	2.526432	0.01640259	0.01173514	0.01739686
3	3_130424650_G_A	130424650	0	59	A	G	0.102	2.589995	1.160157	0.02975346	0.02247689	0.02973203
3	3_131186907_GA_G	131186907	0	59	G	GA	0.136	-2.103876	0.8995494	0.02307631	0.01703441	0.02359939
3	3_131188528_T_G	131188528	0	59	G	T	0.178	-2.161383	0.8540418	0.01432779	0.01012381	0.01544325
3	3_131268824_T_C	131268824	0	59	C	T	0.127	-2.146061	0.9213524	0.02361643	0.01746995	0.02409753
3	3_131283007_G_A	131283007	0	59	A	G	0.017	-5.874691	2.61302	0.02866509	0.02158164	0.02873563
3	3_132063914_A_T	132063914	0	59	T	A	0.525	1.452988	0.6505578	0.02968353	0.02241928	0.02966804
3	3_132068831_C_T	132068831	0	59	T	C	0.508	1.501213	0.6718876	0.02962263	0.02236912	0.02961231
3	3_132068876_G_A	132068876	0	59	A	G	0.508	1.501213	0.6718876	0.02962263	0.02236912	0.02961231
3	3_132075707_A_G	132075707	0	59	G	A	0.508	1.501213	0.6718876	0.02962263	0.02236912	0.02961231
3	3_132075746_G_A	132075746	0	59	A	G	0.508	1.501213	0.6718876	0.02962263	0.02236912	0.02961231
3	3_132221076_CTTT_C	132221076	0	59	C	CTTT	0.059	3.390223	1.484937	0.02638733	0.01971789	0.02664673
3	3_132379947_C_G	132379947	0	59	G	C	0.305	1.863557	0.9600065	0.0574614	0.04604805	0.05495164
3	3_133329943_G_A	133329943	0	59	A	G	0.712	-1.866554	0.7485617	0.01574391	0.01122148	0.01677834
3	3_133335787_C_T	133335787	0	59	T	C	0.712	-1.866554	0.7485617	0.01574391	0.01122148	0.01677834
3	3_133368362_T_G	133368362	0	59	G	T	0.78	-2.037505	0.8219864	0.01633935	0.01168574	0.01733754
3	3_133465283_A_G	133465283	0	59	G	A	0.559	1.894382	0.7172248	0.01078013	0.007419214	0.01205741
3	3_133474147_T_G	133474147	0	59	G	T	0.119	2.207002	1.105799	0.05100509	0.04044359	0.04908285
3	3_133941320_C_T	133941320	0	59	T	C	0.144	2.072619	0.9732204	0.03777515	0.02915866	0.03705213
3	3_133969352_G_A	133969352	0	59	A	G	0.127	2.150378	1.023289	0.04028382	0.03127534	0.03933567
3	3_134278270_C_T	134278270	0	59	T	C	0.381	-1.493935	0.6205272	0.01950781	0.0141807	0.02029542
3	3_134328971_A_G	134328971	0	59	G	A	0.059	3.125605	1.547888	0.04843458	0.03822874	0.04674667
3	3_135742057_G_GTGTTTTGTTT	135742057	0	59	GTGTTTTGTTT	G	0.153	-2.315273	1.032951	0.02913096	0.02196449	0.02916226
3	3_136152562_A_G	136152562	0	59	G	A	0.017	-5.32579	2.734	0.05662269	0.04531681	0.05418907
3	3_136728886_G_T	136728886	0	59	T	G	0.593	1.590765	0.6760404	0.02229159	0.01640325	0.02287484
3	3_138347988_T_C	138347988	0	59	C	T	0.034	4.715035	2.098167	0.02873446	0.02163861	0.02879917
3	3_138724757_C_G	138724757	0	59	G	C	0.78	2.064348	0.8333517	0.01640488	0.01173693	0.01739901
3	3_140682087_TA_T	140682087	0	59	T	TA	0.085	2.67949	1.233739	0.03427806	0.02622862	0.03386512
3	3_140784964_G_A	140784964	0	59	A	G	0.017	-6.290435	2.525101	0.01583771	0.01129452	0.01686652
3	3_141499528_G_C	141499528	0	59	C	G	0.025	-4.289753	2.114452	0.04742386	0.0373606	0.04582805
3	3_142215178_A_C	142215178	0	59	C	A	0.39	-1.21575	0.5614043	0.03478099	0.02664845	0.03432378
3	3_142280321_T_G	142280321	0	59	G	T	0.085	3.187156	1.305073	0.01790551	0.01291403	0.01880304
3	3_142423477_ATTTTTTTTT_ATTTTTTTT	142423477	0	59	ATTTTTTTT	ATTTTTTTTT	0.119	2.250588	0.8589964	0.01139269	0.007881078	0.01264715
3	3_142467310_C_T	142467310	0	59	T	C	0.144	2.023939	1.034639	0.0556248	0.04444799	0.05328186
3	3_142522753_A_T	142522753	0	59	T	A	0.144	2.023939	1.034639	0.0556248	0.04444799	0.05328186
3	3_142523349_G_A	142523349	0	59	A	G	0.169	1.845417	0.9191619	0.04968792	0.03930743	0.04788576
3	3_142524858_G_A	142524858	0	59	A	G	0.178	1.844664	0.9185221	0.04962451	0.0392528	0.04782814
3	3_143513975_A_G	143513975	0	59	G	A	0.144	2.236712	0.8910829	0.01509845	0.01072002	0.01617077
3	3_147120444_TA_T	147120444	0	59	T	TA	0.076	-3.107781	1.299738	0.02031341	0.01482113	0.02104348
3	3_147121751_C_T	147121751	0	59	T	C	0.212	-1.768591	0.801447	0.03160367	0.02400539	0.03142377
3	3_148459395_C_T	148459395	0	59	T	C	0.424	1.543427	0.7130137	0.03485333	0.02670888	0.03438975
3	3_148601439_G_C	148601439	0	59	C	G	0.017	5.365185	2.622792	0.04567988	0.03586642	0.04424285
[truncated: 8,001 more rows]
