# Supplementary material for: Genomic Markers Associated with Cytomegalovirus DNAemia in Kidney Transplant Recipients
Source: Viruses. 2023 Nov 8;15(11):2227. doi: 10.3390/v15112227 (PMC10674338; doi:10.3390/v15112227)
Supplement: Supplementary file 1 [file viruses-15-02227-s001.zip › S8_peak_viral_load.meta_assoc.txt]

MarkerName	Allele1	Allele2	Weight	Zscore	P-value	Direction
17_76562622_A_G	a	g	36	-11.115	1.061e-28	-?
19_9011412_C_T	t	c	36	11.115	1.061e-28	+?
9_34382597_T_A	a	t	36	11.115	1.061e-28	+?
6_28198828_C_T	t	c	36	11.115	1.061e-28	+?
16_23414819_C_T	t	c	36	11.115	1.061e-28	+?
12_12879090_C_CAAA	caaa	c	36	11.115	1.061e-28	+?
6_24651405_T_C	t	c	36	-11.115	1.061e-28	-?
16_23593441_C_A	a	c	36	11.115	1.061e-28	+?
17_49047922_C_A	a	c	36	11.115	1.061e-28	+?
6_30076636_A_G	a	g	36	-11.115	1.061e-28	-?
6_29910717_A_T	a	t	36	-11.115	1.061e-28	-?
18_61078928_G_A	a	g	36	11.115	1.061e-28	+?
7_100225112_G_A	a	g	36	11.115	1.061e-28	+?
7_99997454_C_T	t	c	36	11.115	1.061e-28	+?
1_13123665_T_G	t	g	36	-11.115	1.061e-28	-?
7_100027688_C_G	c	g	36	-11.115	1.061e-28	-?
11_17158120_C_T	t	c	36	11.115	1.061e-28	+?
11_117691393_C_T	t	c	36	11.115	1.061e-28	+?
16_23491345_C_A	a	c	36	11.115	1.061e-28	+?
7_99751404_GC_G	g	gc	36	11.115	1.061e-28	+?
14_59798034_T_C	t	c	36	-11.115	1.061e-28	-?
12_130883554_CTT_C	ctt	c	36	-11.115	1.061e-28	-?
3_49011025_AG_A	a	ag	36	11.115	1.061e-28	+?
7_100028757_G_T	t	g	36	11.115	1.061e-28	+?
10_27382237_G_A	a	g	36	11.115	1.061e-28	+?
6_111922503_G_C	c	g	36	11.115	1.061e-28	+?
7_99700378_C_T	t	c	36	11.115	1.061e-28	+?
7_100171627_GAC_G	g	gac	36	11.115	1.061e-28	+?
6_28217831_G_T	t	g	36	11.115	1.061e-28	+?
12_89853387_C_A	a	c	36	11.115	1.061e-28	+?
2_158971618_C_G	c	g	36	-11.115	1.061e-28	-?
16_21817457_G_A	a	g	36	11.115	1.061e-28	+?
6_111919105_C_T	t	c	36	11.115	1.061e-28	+?
1_161336289_A_G	a	g	36	-11.115	1.061e-28	-?
6_29856426_C_G	c	g	36	-10.183	2.367e-24	-?
6_29856427_G_T	t	g	36	10.183	2.367e-24	+?
20_3726948_C_CTTTT	ctttt	c	36	10.183	2.367e-24	+?
6_29855818_G_T	t	g	36	10.183	2.367e-24	+?
6_29856248_T_C	t	c	36	-10.183	2.367e-24	-?
12_124821666_G_A	a	g	95	7.68	1.587e-14	++
8_86178959_A_G	a	g	95	-7.651	1.992e-14	--
1_13219066_T_C	t	c	95	-7.341	2.123e-13	--
11_102820965_G_A	a	g	95	7.142	9.202e-13	++
6_30039349_C_T	t	c	95	7.135	9.699e-13	++
6_29856766_C_T	t	c	36	7.128	1.02e-12	+?
6_29857522_G_A	a	g	36	7.128	1.02e-12	+?
6_29857671_T_G	t	g	36	-7.128	1.02e-12	-?
6_29857570_G_A	a	g	36	7.128	1.02e-12	+?
6_29855574_GCCCTGGCCCTGA_G	g	gccctggccctga	36	7.128	1.02e-12	+?
Y_16344458_GCTT_G	g	gctt	36	6.95	3.646e-12	+?
19_55086249_T_C	t	c	95	-6.901	5.17e-12	--
3_4768756_A_G	a	g	95	-6.879	6.048e-12	--
2_85531116_C_T	t	c	95	6.844	7.7e-12	++
17_18128990_G_C	c	g	95	6.688	2.255e-11	+-
7_148921140_G_A	a	g	95	6.576	4.841e-11	+-
6_46977475_A_G	a	g	95	-6.492	8.479e-11	-+
7_128533421_G_C	c	g	95	6.262	3.794e-10	+-
6_30622459_G_A	a	g	95	6.249	4.14e-10	+-
6_30615244_G_A	a	g	95	6.249	4.14e-10	+-
6_30076728_T_C	t	c	95	-6.249	4.14e-10	-+
11_110582124_A_C	a	c	36	-6.183	6.288e-10	-?
16_23499858_C_T	t	c	95	6.033	1.607e-09	+-
16_23521595_T_C	t	c	95	-6.033	1.607e-09	-+
16_23521790_T_G	t	g	95	-6.033	1.607e-09	-+
16_23569264_C_G	c	g	95	-6.033	1.607e-09	-+
16_23570777_C_A	a	c	95	6.033	1.607e-09	+-
16_23569207_C_T	t	c	95	6.033	1.607e-09	+-
6_29910507_C_T	t	c	95	5.957	2.57e-09	+-
6_29910468_G_A	a	g	95	5.957	2.57e-09	+-
6_29911326_A_G	a	g	95	-5.957	2.57e-09	-+
6_29910679_G_A	a	g	95	5.957	2.57e-09	+-
3_169642783_A_T	a	t	36	-5.885	3.987e-09	-?
15_25337657_C_T	t	c	36	5.882	4.049e-09	+?
15_56385868_A_G	a	g	36	-5.844	5.1e-09	-?
12_124796573_G_A	a	g	36	5.787	7.165e-09	+?
12_124811041_A_G	a	g	36	-5.787	7.165e-09	-?
4_16017960_A_G	a	g	36	-5.747	9.061e-09	-?
6_31510034_A_C	a	c	36	-5.747	9.061e-09	-?
5_158588246_C_G	c	g	36	-5.733	9.877e-09	-?
18_24171509_G_A	a	g	36	5.733	9.877e-09	+?
19_3017976_CAG_C	cag	c	36	-5.732	9.911e-09	-?
13_52958345_G_A	a	g	36	5.732	9.911e-09	+?
4_57889964_AT_A	a	at	36	5.732	9.911e-09	+?
4_186336474_A_C	a	c	36	-5.732	9.914e-09	-?
11_26692902_T_C	t	c	36	-5.732	9.914e-09	-?
16_4258091_C_T	t	c	36	5.732	9.914e-09	+?
16_89924861_C_T	t	c	36	5.732	9.914e-09	+?
13_38143337_T_C	t	c	36	-5.732	9.914e-09	-?
16_15661724_A_G	a	g	36	-5.732	9.914e-09	-?
6_29857132_C_T	t	c	36	5.732	9.914e-09	+?
5_146258171_G_T	t	g	36	5.732	9.917e-09	+?
1_109656106_T_G	t	g	36	-5.732	9.918e-09	-?
X_155252783_G_T	t	g	36	5.732	9.921e-09	+?
19_39281377_C_G	c	g	36	-5.732	9.921e-09	-?
13_35498236_TTC_T	t	ttc	36	5.732	9.921e-09	+?
1_238053138_A_C	a	c	95	-5.674	1.395e-08	-+
1_26795299_T_C	t	c	36	-5.663	1.487e-08	-?
14_59798031_A_C	a	c	36	-5.663	1.487e-08	-?
18_34322681_AT_A	a	at	36	5.663	1.487e-08	+?
15_25334087_G_A	a	g	36	5.641	1.692e-08	+?
11_64559831_C_T	t	c	36	5.501	3.786e-08	+?
9_36599322_G_A	a	g	36	5.5	3.791e-08	+?
10_103753058_AG_A	a	ag	36	5.5	3.791e-08	+?
16_27505847_G_A	a	g	36	5.5	3.792e-08	+?
13_99630263_G_A	a	g	36	5.5	3.792e-08	+?
4_57896699_G_T	t	g	36	-5.5	3.792e-08	-?
16_14738116_G_GT	g	gt	36	-5.5	3.792e-08	-?
7_100468653_GGTTTT_G	g	ggtttt	36	5.5	3.793e-08	+?
3_197653169_G_A	a	g	36	5.5	3.793e-08	+?
1_201351644_TGAAATGACTCCTCCTCTCCC_T	t	tgaaatgactcctcctctccc	36	5.5	3.793e-08	+?
1_183100326_G_A	a	g	36	5.5	3.793e-08	+?
21_44280032_T_A	a	t	36	5.5	3.793e-08	+?
21_44313530_G_A	a	g	36	5.5	3.793e-08	+?
1_183100327_G_A	a	g	36	5.5	3.793e-08	+?
17_53016209_G_T	t	g	36	-5.5	3.793e-08	-?
9_15487003_AT_A	a	at	36	5.5	3.797e-08	+?
4_159618710_G_T	t	g	36	5.5	3.797e-08	+?
20_2686431_CCACACACACACA_C	ccacacacacaca	c	36	-5.5	3.797e-08	-?
19_45571592_A_C	a	c	36	-5.5	3.799e-08	-?
7_91735023_G_C	c	g	36	5.49	4.012e-08	+?
10_90354423_G_C	c	g	36	5.49	4.012e-08	+?
7_138305581_A_G	a	g	36	-5.49	4.012e-08	-?
4_95585197_T_C	t	c	36	-5.49	4.012e-08	-?
1_182429962_G_A	a	g	36	5.49	4.012e-08	+?
2_42483813_G_T	t	g	36	5.49	4.012e-08	+?
8_18429913_C_T	t	c	36	5.49	4.012e-08	+?
19_17973434_G_A	a	g	36	5.49	4.012e-08	+?
19_55177691_C_T	t	c	36	5.49	4.012e-08	+?
9_133230293_A_G	a	g	36	-5.49	4.012e-08	-?
11_17663747_G_A	a	g	36	5.49	4.012e-08	+?
6_159197288_T_C	t	c	36	-5.49	4.012e-08	-?
11_627140_C_T	t	c	36	5.49	4.012e-08	+?
19_4268906_A_C	a	c	36	-5.49	4.012e-08	-?
7_72613683_TAA_T	t	taa	36	5.49	4.012e-08	+?
5_141993498_G_T	t	g	36	5.49	4.012e-08	+?
2_11780469_C_T	t	c	36	5.49	4.012e-08	+?
1_202155363_TTG_T	t	ttg	36	5.49	4.012e-08	+?
7_158698575_G_A	a	g	36	5.49	4.012e-08	+?
19_7918129_C_T	t	c	36	5.49	4.012e-08	+?
2_179363934_C_T	t	c	36	5.49	4.012e-08	+?
19_6416076_GC_G	g	gc	36	5.49	4.012e-08	+?
4_8062533_C_A	a	c	36	5.49	4.012e-08	+?
7_120969825_C_A	a	c	36	5.49	4.012e-08	+?
19_17169630_T_C	t	c	36	-5.49	4.012e-08	-?
15_86122529_G_A	a	g	36	5.49	4.012e-08	+?
12_4479480_G_C	c	g	36	5.49	4.012e-08	+?
14_39703451_G_A	a	g	36	5.49	4.012e-08	+?
X_154088986_C_A	a	c	36	5.49	4.012e-08	+?
19_49619761_C_T	t	c	36	5.49	4.012e-08	+?
17_80404546_C_T	t	c	36	5.49	4.012e-08	+?
14_64588837_G_A	a	g	36	5.49	4.012e-08	+?
17_11568094_A_G	a	g	36	-5.49	4.012e-08	-?
9_27206509_C_A	a	c	36	5.49	4.012e-08	+?
10_104597308_G_A	a	g	36	5.49	4.012e-08	+?
19_55494284_G_A	a	g	36	5.49	4.012e-08	+?
10_13824875_G_C	c	g	36	5.49	4.012e-08	+?
8_1624848_G_A	a	g	36	5.49	4.012e-08	+?
12_49415494_C_A	a	c	36	5.49	4.012e-08	+?
11_71627496_T_A	a	t	36	5.49	4.012e-08	+?
12_56528385_AT_ATT	at	att	36	-5.49	4.012e-08	-?
15_76077790_T_G	t	g	36	-5.49	4.012e-08	-?
5_16685825_A_C	a	c	36	-5.49	4.012e-08	-?
22_24984384_G_C	c	g	36	5.49	4.012e-08	+?
11_500840_C_T	t	c	36	5.49	4.012e-08	+?
3_39167072_G_A	a	g	36	5.49	4.012e-08	+?
20_34309943_T_C	t	c	36	-5.49	4.012e-08	-?
8_7195473_C_A	a	c	36	5.49	4.012e-08	+?
2_106987354_T_C	t	c	36	-5.49	4.012e-08	-?
1_161183962_A_G	a	g	36	-5.49	4.012e-08	-?
4_178257364_G_C	c	g	36	5.49	4.012e-08	+?
1_207818729_G_C	c	g	36	5.49	4.012e-08	+?
5_42800866_G_A	a	g	36	5.49	4.012e-08	+?
5_73207613_G_A	a	g	36	5.49	4.012e-08	+?
8_143997809_T_C	t	c	36	-5.49	4.012e-08	-?
16_87723183_G_A	a	g	36	5.49	4.012e-08	+?
19_39008195_C_T	t	c	36	5.49	4.012e-08	+?
3_21448211_C_A	a	c	36	5.49	4.012e-08	+?
5_1410936_C_T	t	c	36	5.49	4.012e-08	+?
11_17650602_GATGGACGGACAGATGGATGGATGGATGGATGAATGA_G	g	gatggacggacagatggatggatggatggatgaatga	36	5.49	4.012e-08	+?
10_133058649_G_A	a	g	36	5.49	4.012e-08	+?
14_75503327_G_A	a	g	36	5.49	4.012e-08	+?
8_59346943_A_T	a	t	36	-5.49	4.012e-08	-?
16_30389743_C_A	a	c	36	5.49	4.012e-08	+?
3_9412826_G_A	a	g	36	5.49	4.012e-08	+?
19_48964785_C_CA	ca	c	36	5.49	4.012e-08	+?
11_10874540_G_A	a	g	36	5.49	4.012e-08	+?
19_38995353_C_T	t	c	36	5.49	4.012e-08	+?
11_64799822_C_T	t	c	36	5.49	4.012e-08	+?
1_32782428_T_C	t	c	36	-5.49	4.012e-08	-?
19_15769359_C_T	t	c	36	5.49	4.012e-08	+?
11_126110956_G_A	a	g	36	5.49	4.012e-08	+?
2_105705628_A_G	a	g	36	-5.49	4.012e-08	-?
2_207911120_GAAAAA_G	g	gaaaaa	36	5.49	4.012e-08	+?
X_69645557_A_C	a	c	36	-5.49	4.012e-08	-?
13_46718503_T_C	t	c	36	-5.49	4.012e-08	-?
5_81571760_C_T	t	c	36	5.49	4.012e-08	+?
15_55930926_T_C	t	c	36	-5.49	4.012e-08	-?
1_54870330_A_T	a	t	36	-5.49	4.012e-08	-?
10_90354430_T_C	t	c	36	-5.49	4.012e-08	-?
22_50278879_T_C	t	c	36	-5.49	4.012e-08	-?
14_103957318_G_C	c	g	36	5.49	4.012e-08	+?
20_17462742_C_T	t	c	36	5.49	4.012e-08	+?
12_109612188_T_C	t	c	36	-5.49	4.012e-08	-?
14_51206145_A_T	a	t	36	-5.49	4.012e-08	-?
19_55236679_C_G	c	g	36	-5.49	4.012e-08	-?
19_42804350_A_G	a	g	36	-5.49	4.012e-08	-?
17_74289155_C_T	t	c	36	5.49	4.012e-08	+?
6_6195906_C_T	t	c	36	5.49	4.012e-08	+?
1_19581170_A_G	a	g	36	-5.49	4.012e-08	-?
16_16253526_G_A	a	g	36	5.49	4.012e-08	+?
6_37448763_G_A	a	g	36	5.49	4.012e-08	+?
16_14678357_A_C	a	c	36	-5.49	4.012e-08	-?
10_71685664_T_C	t	c	36	-5.49	4.012e-08	-?
10_101594235_C_T	t	c	36	5.49	4.012e-08	+?
9_71849344_C_T	t	c	36	5.49	4.012e-08	+?
16_85948033_A_G	a	g	36	-5.49	4.012e-08	-?
10_69750198_G_A	a	g	36	5.49	4.012e-08	+?
19_17416570_A_G	a	g	36	-5.49	4.012e-08	-?
5_122720737_C_T	t	c	36	5.49	4.012e-08	+?
7_75053638_C_T	t	c	36	5.49	4.012e-08	+?
2_99771609_G_C	c	g	36	5.49	4.012e-08	+?
11_70653046_C_T	t	c	36	5.49	4.012e-08	+?
17_21188344_C_G	c	g	36	-5.49	4.012e-08	-?
12_22015989_C_T	t	c	36	5.49	4.012e-08	+?
6_44149202_A_C	a	c	36	-5.49	4.012e-08	-?
16_83951140_G_C	c	g	36	5.49	4.012e-08	+?
11_71193058_C_T	t	c	36	5.49	4.012e-08	+?
14_24649414_G_T	t	g	36	5.49	4.012e-08	+?
X_153038272_G_A	a	g	36	5.49	4.012e-08	+?
19_17991770_C_T	t	c	36	5.49	4.012e-08	+?
22_49661790_G_C	c	g	36	5.49	4.012e-08	+?
19_5708278_G_A	a	g	36	5.49	4.012e-08	+?
12_124349239_C_T	t	c	36	5.49	4.012e-08	+?
6_9933059_C_T	t	c	36	5.49	4.012e-08	+?
12_122760984_A_G	a	g	36	-5.49	4.012e-08	-?
16_57973431_G_C	c	g	36	5.49	4.012e-08	+?
20_62324754_C_A	a	c	36	5.49	4.012e-08	+?
1_144164971_C_CTG	ctg	c	36	5.49	4.012e-08	+?
12_48360895_G_C	c	g	36	5.49	4.012e-08	+?
2_225422624_C_A	a	c	36	5.49	4.012e-08	+?
9_36665388_A_G	a	g	36	-5.49	4.012e-08	-?
2_204137296_AGTT_A	a	agtt	36	5.49	4.012e-08	+?
6_43270601_A_AT	a	at	36	-5.49	4.012e-08	-?
19_49593501_A_G	a	g	36	-5.49	4.012e-08	-?
11_24206796_AAAAG_A	a	aaaag	36	5.49	4.012e-08	+?
8_19171228_G_A	a	g	36	5.49	4.012e-08	+?
11_65307303_G_A	a	g	36	5.49	4.012e-08	+?
6_11213566_G_T	t	g	36	5.49	4.012e-08	+?
4_1388817_C_A	a	c	36	5.49	4.012e-08	+?
16_23494073_G_A	a	g	36	5.49	4.012e-08	+?
3_184099271_C_CT	ct	c	36	5.49	4.012e-08	+?
10_127417529_A_G	a	g	36	-5.49	4.012e-08	-?
5_147695127_A_G	a	g	36	-5.49	4.012e-08	-?
4_30341556_TGA_T	t	tga	36	5.49	4.012e-08	+?
4_122253952_A_C	a	c	36	-5.49	4.012e-08	-?
17_33592194_C_G	c	g	36	-5.49	4.012e-08	-?
7_5023453_TTTGTTG_T	t	tttgttg	36	5.49	4.012e-08	+?
19_24063296_G_C	c	g	36	5.49	4.012e-08	+?
14_103915444_T_C	t	c	36	-5.49	4.012e-08	-?
4_6711290_C_T	t	c	36	5.49	4.012e-08	+?
16_71961535_A_C	a	c	36	-5.49	4.012e-08	-?
15_43819450_A_G	a	g	36	-5.49	4.012e-08	-?
11_102479722_G_A	a	g	36	5.49	4.012e-08	+?
1_150776797_T_C	t	c	36	-5.49	4.012e-08	-?
17_44564616_G_A	a	g	36	5.49	4.012e-08	+?
1_40661474_T_C	t	c	36	-5.49	4.012e-08	-?
22_17178449_C_G	c	g	36	-5.49	4.012e-08	-?
3_13384827_A_G	a	g	36	-5.49	4.012e-08	-?
15_42172572_G_A	a	g	36	5.49	4.012e-08	+?
7_22539781_G_A	a	g	36	5.49	4.012e-08	+?
12_122794283_G_A	a	g	36	5.49	4.012e-08	+?
11_71627501_T_C	t	c	36	-5.49	4.012e-08	-?
20_4772910_AGGGG_A	a	agggg	36	5.49	4.012e-08	+?
10_135197889_G_A	a	g	36	5.49	4.012e-08	+?
1_207793289_A_C	a	c	36	-5.49	4.012e-08	-?
17_78404191_A_G	a	g	36	-5.49	4.012e-08	-?
19_17011976_G_A	a	g	36	5.49	4.012e-08	+?
22_22986159_G_A	a	g	36	5.49	4.012e-08	+?
1_113245535_T_C	t	c	36	-5.49	4.012e-08	-?
10_90353833_C_T	t	c	36	5.49	4.012e-08	+?
X_49779301_C_G	c	g	36	-5.49	4.012e-08	-?
7_2608467_G_A	a	g	36	5.49	4.012e-08	+?
6_161522844_T_C	t	c	36	-5.49	4.012e-08	-?
10_126187408_T_C	t	c	36	-5.49	4.012e-08	-?
19_806559_A_G	a	g	36	-5.49	4.012e-08	-?
5_176637192_T_C	t	c	36	-5.49	4.012e-08	-?
12_432376_C_CAAAAAAAAAA	caaaaaaaaaa	c	36	5.49	4.012e-08	+?
12_105452095_T_TA	t	ta	36	-5.49	4.012e-08	-?
7_84651907_G_A	a	g	36	5.49	4.012e-08	+?
1_197029598_C_G	c	g	36	-5.49	4.012e-08	-?
5_73190159_C_A	a	c	36	5.49	4.012e-08	+?
17_466005_C_A	a	c	36	5.49	4.012e-08	+?
1_33585537_G_A	a	g	36	5.49	4.012e-08	+?
3_128631671_C_T	t	c	36	5.49	4.012e-08	+?
12_8376217_G_C	c	g	36	5.49	4.012e-08	+?
20_126214_G_A	a	g	36	5.49	4.012e-08	+?
16_68338083_C_T	t	c	36	5.49	4.012e-08	+?
13_20357111_A_G	a	g	36	-5.49	4.012e-08	-?
15_66797779_C_T	t	c	36	5.49	4.012e-08	+?
1_153276391_T_C	t	c	36	-5.49	4.012e-08	-?
5_92920630_T_C	t	c	36	5.49	4.012e-08	+?
7_103008590_C_G	c	g	36	-5.49	4.012e-08	-?
10_77312096_T_C	t	c	36	-5.49	4.012e-08	-?
15_43552204_A_G	a	g	36	-5.49	4.012e-08	-?
19_16918918_C_T	t	c	36	5.49	4.012e-08	+?
7_76062447_TTTGG_T	t	tttgg	36	5.49	4.012e-08	+?
1_145209538_G_A	a	g	36	5.49	4.012e-08	+?
16_83991113_A_G	a	g	36	-5.49	4.012e-08	-?
1_23520259_C_A	a	c	36	5.49	4.012e-08	+?
17_81082375_G_A	a	g	36	5.49	4.012e-08	+?
4_76924657_C_G	c	g	36	-5.49	4.012e-08	-?
11_64337080_G_C	c	g	36	5.49	4.012e-08	+?
14_73006898_C_T	t	c	36	5.49	4.012e-08	+?
9_161711_T_C	t	c	36	-5.49	4.012e-08	-?
20_3017771_G_A	a	g	36	5.49	4.012e-08	+?
8_121279009_C_T	t	c	36	5.49	4.012e-08	+?
8_144620334_C_G	c	g	36	-5.49	4.012e-08	-?
16_4562286_G_A	a	g	36	5.49	4.012e-08	+?
4_170913321_A_C	a	c	36	-5.49	4.012e-08	-?
10_73270054_G_A	a	g	36	5.49	4.012e-08	+?
6_133015444_A_G	a	g	36	-5.49	4.012e-08	-?
2_148675976_T_C	t	c	36	-5.49	4.012e-08	-?
2_58425892_C_T	t	c	36	5.49	4.012e-08	+?
17_79224978_TGGTAATCACAAGCCAAGTGACAATGCCGCAGGTGTTTTAAAGGGGAGCAAGGGAGATAAAAC_T	t	tggtaatcacaagccaagtgacaatgccgcaggtgttttaaaggggagcaagggagataaaac	36	5.49	4.012e-08	+?
7_44009478_C_G	c	g	36	-5.49	4.012e-08	-?
9_69432779_A_T	a	t	36	-5.49	4.012e-08	-?
1_149764332_G_C	c	g	36	5.49	4.012e-08	+?
18_59854993_C_T	t	c	36	5.49	4.012e-08	+?
10_90435581_CTTTTTA_C	cttttta	c	36	-5.49	4.012e-08	-?
20_49204509_G_GC	g	gc	36	-5.49	4.012e-08	-?
18_6263970_T_C	t	c	36	-5.49	4.012e-08	-?
15_75941897_C_T	t	c	36	5.49	4.012e-08	+?
8_68536329_C_T	t	c	36	5.49	4.012e-08	+?
1_205039019_G_A	a	g	36	5.49	4.012e-08	+?
4_153410612_A_T	a	t	36	-5.49	4.012e-08	-?
19_54947321_C_T	t	c	36	5.49	4.012e-08	+?
20_35436796_C_G	c	g	36	-5.49	4.012e-08	-?
19_1244081_G_A	a	g	36	5.49	4.012e-08	+?
21_43342246_G_A	a	g	36	5.49	4.012e-08	+?
1_160806090_T_A	a	t	36	5.49	4.012e-08	+?
19_24362803_G_A	a	g	36	5.49	4.012e-08	+?
19_8160857_C_A	a	c	36	5.49	4.012e-08	+?
19_9801839_A_C	a	c	36	-5.49	4.012e-08	-?
18_18562856_T_G	t	g	36	-5.49	4.012e-08	-?
3_196612959_C_T	t	c	36	5.49	4.012e-08	+?
16_27738644_G_A	a	g	36	5.49	4.012e-08	+?
13_28901882_C_A	a	c	36	5.49	4.012e-08	+?
7_6825834_C_T	t	c	36	5.49	4.012e-08	+?
22_45075741_C_T	t	c	36	5.49	4.012e-08	+?
15_23572444_G_T	t	g	36	5.49	4.012e-08	+?
6_125403524_A_G	a	g	36	-5.49	4.012e-08	-?
11_43964276_G_C	c	g	36	5.49	4.012e-08	+?
8_7195632_C_T	t	c	36	5.49	4.012e-08	+?
15_31093647_T_G	t	g	36	-5.49	4.012e-08	-?
1_41284100_A_C	a	c	36	-5.49	4.012e-08	-?
10_105178425_G_A	a	g	36	5.49	4.012e-08	+?
1_92573404_T_A	a	t	36	5.49	4.012e-08	+?
2_98810904_A_G	a	g	36	-5.49	4.012e-08	-?
1_58999978_A_G	a	g	36	-5.49	4.012e-08	-?
5_175477697_C_T	t	c	36	5.49	4.012e-08	+?
20_32637001_A_G	a	g	36	-5.49	4.012e-08	-?
11_102395492_C_CTG	ctg	c	36	5.49	4.012e-08	+?
19_55713796_T_C	t	c	36	-5.49	4.012e-08	-?
8_67072219_T_C	t	c	36	-5.49	4.012e-08	-?
2_42579820_G_T	t	g	36	5.49	4.012e-08	+?
2_63272663_A_C	a	c	36	-5.49	4.012e-08	-?
10_135491222_C_T	t	c	36	5.49	4.012e-08	+?
19_46285420_A_C	a	c	36	-5.49	4.012e-08	-?
3_27329263_T_A	a	t	36	5.49	4.012e-08	+?
16_70502771_T_A	a	t	36	5.49	4.012e-08	+?
16_88722065_C_A	a	c	36	5.49	4.012e-08	+?
20_40911267_A_G	a	g	36	-5.49	4.012e-08	-?
9_69439984_C_G	c	g	36	-5.49	4.012e-08	-?
19_55236677_T_TGGAGTGG	t	tggagtgg	36	-5.49	4.012e-08	-?
2_95542242_T_C	t	c	36	-5.49	4.012e-08	-?
13_49076863_C_T	t	c	36	5.49	4.012e-08	+?
2_44539773_T_C	t	c	36	-5.49	4.012e-08	-?
19_15376536_C_T	t	c	36	5.49	4.012e-08	+?
19_31840519_C_G	c	g	36	-5.49	4.012e-08	-?
4_5642570_G_C	c	g	36	5.49	4.012e-08	+?
5_179069894_G_A	a	g	36	5.49	4.012e-08	+?
7_30092284_T_A	a	t	36	5.49	4.012e-08	+?
17_73499044_C_T	t	c	36	5.49	4.012e-08	+?
22_21344665_C_A	a	c	36	5.49	4.012e-08	+?
17_7750436_C_T	t	c	36	5.49	4.012e-08	+?
15_23602570_G_T	t	g	36	5.49	4.012e-08	+?
6_24480076_T_A	a	t	36	5.49	4.012e-08	+?
6_10924702_G_A	a	g	36	5.49	4.012e-08	+?
12_30848695_A_C	a	c	36	-5.49	4.012e-08	-?
1_4847595_G_A	a	g	36	5.49	4.012e-08	+?
17_42957096_C_T	t	c	36	5.49	4.012e-08	+?
17_37224094_C_T	t	c	36	5.49	4.012e-08	+?
5_171777393_G_A	a	g	36	5.49	4.012e-08	+?
2_166756333_G_A	a	g	36	5.49	4.012e-08	+?
22_42392704_A_G	a	g	36	-5.49	4.012e-08	-?
19_51190356_G_A	a	g	36	5.49	4.012e-08	+?
17_45690016_G_T	t	g	36	5.49	4.012e-08	+?
19_55236681_G_T	t	g	36	5.49	4.012e-08	+?
5_94988022_C_T	t	c	36	5.49	4.012e-08	+?
17_73842836_C_T	t	c	36	5.49	4.012e-08	+?
19_23651057_T_C	t	c	36	-5.49	4.012e-08	-?
19_15769031_CTT_C	ctt	c	36	-5.49	4.012e-08	-?
16_4564326_C_T	t	c	36	5.49	4.012e-08	+?
16_32177947_C_T	t	c	36	5.49	4.012e-08	+?
6_132043651_G_A	a	g	36	5.49	4.012e-08	+?
8_15480643_A_G	a	g	36	-5.49	4.012e-08	-?
19_15770051_C_T	t	c	36	5.49	4.012e-08	+?
1_52211387_G_A	a	g	36	5.49	4.012e-08	+?
12_71158453_G_A	a	g	36	5.49	4.012e-08	+?
12_9085415_A_G	a	g	36	-5.49	4.012e-08	-?
6_26273213_C_A	a	c	36	5.49	4.012e-08	+?
2_155303092_C_T	t	c	36	5.49	4.012e-08	+?
1_77672452_T_C	t	c	36	-5.49	4.012e-08	-?
2_25384472_G_A	a	g	36	5.49	4.012e-08	+?
9_135277166_G_C	c	g	36	5.49	4.012e-08	+?
17_81082493_CCA_C	cca	c	36	-5.49	4.012e-08	-?
19_56029976_A_C	a	c	36	-5.49	4.012e-08	-?
11_6458872_C_T	t	c	36	5.49	4.012e-08	+?
16_18800130_C_G	c	g	36	-5.49	4.012e-08	-?
17_40146819_TCA_T	t	tca	36	5.49	4.012e-08	+?
15_101019690_G_A	a	g	36	5.49	4.012e-08	+?
19_14261864_GT_G	g	gt	36	5.49	4.012e-08	+?
8_48650190_G_A	a	g	36	5.49	4.012e-08	+?
18_43419041_C_T	t	c	36	5.49	4.012e-08	+?
3_52426600_G_A	a	g	36	5.49	4.012e-08	+?
19_44807370_A_C	a	c	36	-5.49	4.012e-08	-?
15_93447766_T_G	t	g	36	-5.49	4.012e-08	-?
11_118520969_C_T	t	c	36	5.49	4.012e-08	+?
20_44845440_C_T	t	c	36	5.49	4.012e-08	+?
19_18337153_CG_C	cg	c	36	-5.49	4.012e-08	-?
19_5696101_C_T	t	c	36	5.49	4.012e-08	+?
15_41860668_C_T	t	c	36	5.49	4.012e-08	+?
11_43919144_A_G	a	g	36	-5.49	4.012e-08	-?
2_100013179_A_T	a	t	36	-5.49	4.012e-08	-?
9_138662812_A_G	a	g	36	-5.49	4.012e-08	-?
19_40030559_G_A	a	g	36	5.49	4.012e-08	+?
3_58131608_T_C	t	c	36	-5.49	4.012e-08	-?
17_9471840_C_T	t	c	36	5.49	4.012e-08	+?
19_18433705_G_T	t	g	36	5.49	4.012e-08	+?
X_68424707_C_G	c	g	36	-5.49	4.012e-08	-?
3_13544593_C_T	t	c	36	5.49	4.012e-08	+?
14_103995591_C_T	t	c	36	5.49	4.012e-08	+?
1_157490910_G_A	a	g	36	5.49	4.012e-08	+?
11_616770_C_T	t	c	36	5.49	4.012e-08	+?
7_18631311_A_C	a	c	36	-5.49	4.012e-08	-?
17_36971023_G_A	a	g	36	5.49	4.012e-08	+?
7_75659621_G_A	a	g	36	5.49	4.012e-08	+?
19_13084410_A_G	a	g	36	-5.49	4.012e-08	-?
15_29561415_G_C	c	g	36	5.49	4.012e-08	+?
15_30853883_G_A	a	g	36	5.49	4.012e-08	+?
16_1272901_C_T	t	c	36	5.49	4.012e-08	+?
3_38349245_G_A	a	g	36	5.49	4.012e-08	+?
9_91653255_GATA_G	g	gata	36	5.49	4.012e-08	+?
15_100211410_G_A	a	g	36	5.49	4.012e-08	+?
10_71917648_A_G	a	g	36	-5.49	4.012e-08	-?
19_53578825_A_G	a	g	36	-5.49	4.012e-08	-?
17_77915949_G_A	a	g	36	5.49	4.012e-08	+?
14_71514725_T_C	t	c	36	-5.49	4.012e-08	-?
X_73062834_G_A	a	g	36	5.49	4.012e-08	+?
2_174828517_GC_G	g	gc	36	5.49	4.012e-08	+?
7_128506641_G_A	a	g	36	5.49	4.012e-08	+?
11_92532965_C_T	t	c	36	5.49	4.012e-08	+?
10_116079649_T_C	t	c	36	-5.49	4.012e-08	-?
2_242046189_A_G	a	g	36	-5.49	4.012e-08	-?
19_55752647_G_A	a	g	36	5.49	4.012e-08	+?
19_15166129_C_A	a	c	36	5.49	4.012e-08	+?
6_158349699_C_T	t	c	36	5.49	4.012e-08	+?
2_1546300_C_T	t	c	36	5.49	4.012e-08	+?
6_117730798_G_A	a	g	36	5.49	4.012e-08	+?
15_45250709_A_C	a	c	36	-5.49	4.012e-08	-?
14_51721055_T_C	t	c	36	-5.49	4.012e-08	-?
6_117589716_A_G	a	g	36	-5.49	4.012e-08	-?
9_160229_G_A	a	g	36	5.49	4.012e-08	+?
2_113074983_T_C	t	c	36	-5.49	4.012e-08	-?
14_60433392_C_T	t	c	36	5.49	4.012e-08	+?
16_11363098_G_C	c	g	36	5.49	4.012e-08	+?
21_37444571_ACTT_A	a	actt	36	5.49	4.012e-08	+?
3_9952347_C_A	a	c	36	5.49	4.012e-08	+?
12_50304926_G_A	a	g	36	5.49	4.012e-08	+?
19_16601424_C_T	t	c	36	5.49	4.012e-08	+?
1_1982013_C_T	t	c	36	5.49	4.012e-08	+?
19_11240278_G_A	a	g	36	5.49	4.012e-08	+?
8_99033319_G_A	a	g	36	5.49	4.012e-08	+?
3_48625914_C_T	t	c	36	5.49	4.012e-08	+?
9_36665335_T_C	t	c	36	-5.49	4.012e-08	-?
19_16254658_G_A	a	g	36	5.49	4.012e-08	+?
19_39109944_C_A	a	c	36	5.49	4.012e-08	+?
12_62974249_A_C	a	c	36	-5.49	4.012e-08	-?
22_18101886_C_T	t	c	36	5.49	4.012e-08	+?
3_9971966_C_T	t	c	36	5.49	4.012e-08	+?
1_117214342_G_T	t	g	36	5.49	4.012e-08	+?
1_1273621_CG_C	cg	c	36	-5.49	4.012e-08	-?
19_49675456_C_T	t	c	36	5.49	4.012e-08	+?
8_139628323_G_T	t	g	36	5.49	4.012e-08	+?
17_34416630_C_T	t	c	36	5.49	4.012e-08	+?
16_68729270_G_A	a	g	36	5.49	4.012e-08	+?
9_18829981_T_A	a	t	36	5.49	4.012e-08	+?
17_77016317_C_T	t	c	36	5.49	4.012e-08	+?
11_67771217_GCTC_G	g	gctc	36	5.49	4.012e-08	+?
20_18375322_T_G	t	g	36	-5.49	4.012e-08	-?
7_142480023_T_C	t	c	36	-5.49	4.012e-08	-?
9_127915777_T_C	t	c	36	-5.49	4.012e-08	-?
10_105762654_A_G	a	g	36	-5.49	4.012e-08	-?
8_65528341_T_C	t	c	36	-5.49	4.012e-08	-?
1_242121882_T_C	t	c	36	-5.49	4.012e-08	-?
5_14582020_G_A	a	g	36	5.49	4.012e-08	+?
1_92528502_T_C	t	c	36	-5.49	4.012e-08	-?
19_9012748_C_T	t	c	36	5.49	4.012e-08	+?
8_142432321_C_T	t	c	36	5.49	4.012e-08	+?
6_117198603_C_T	t	c	36	5.49	4.012e-08	+?
15_78470933_C_T	t	c	36	5.49	4.012e-08	+?
12_6887559_T_C	t	c	36	-5.49	4.012e-08	-?
10_91162592_G_A	a	g	36	5.49	4.012e-08	+?
19_49526965_C_T	t	c	36	5.49	4.012e-08	+?
15_76523620_C_A	a	c	36	5.49	4.012e-08	+?
12_46764254_A_G	a	g	36	-5.49	4.012e-08	-?
14_65408065_T_A	a	t	36	5.49	4.012e-08	+?
10_23235141_G_A	a	g	36	5.49	4.012e-08	+?
15_43773020_A_AT	a	at	36	-5.49	4.012e-08	-?
9_67938704_C_G	c	g	36	-5.49	4.012e-08	-?
1_15623113_A_G	a	g	36	-5.49	4.012e-08	-?
19_35849883_C_G	c	g	36	-5.49	4.012e-08	-?
19_49631502_A_G	a	g	36	-5.49	4.012e-08	-?
12_7170167_AT_A	a	at	36	5.49	4.012e-08	+?
10_127724987_GC_G	g	gc	36	5.49	4.012e-08	+?
1_6593171_G_A	a	g	36	5.49	4.012e-08	+?
6_105192535_TTA_T	t	tta	36	5.49	4.012e-08	+?
7_102063788_C_T	t	c	36	5.49	4.012e-08	+?
19_9083944_G_A	a	g	36	5.49	4.012e-08	+?
15_85187021_T_C	t	c	36	-5.49	4.012e-08	-?
12_22813970_A_G	a	g	36	-5.49	4.012e-08	-?
8_10480544_G_T	t	g	36	5.49	4.012e-08	+?
11_119020900_C_T	t	c	36	5.49	4.012e-08	+?
15_43037410_T_A	a	t	36	5.49	4.012e-08	+?
3_63983382_A_AT	a	at	36	-5.49	4.012e-08	-?
12_47163218_CA_C	ca	c	36	-5.49	4.012e-08	-?
5_114548072_C_T	t	c	36	5.49	4.012e-08	+?
19_15483751_C_T	t	c	36	5.49	4.012e-08	+?
6_34027155_G_A	a	g	36	5.49	4.012e-08	+?
7_4855128_G_C	c	g	36	5.49	4.012e-08	+?
20_23805796_C_T	t	c	36	5.49	4.012e-08	+?
17_41219517_C_T	t	c	36	5.49	4.012e-08	+?
3_142234404_T_C	t	c	36	-5.49	4.012e-08	-?
2_234079612_G_A	a	g	36	5.49	4.012e-08	+?
1_201044592_T_C	t	c	36	-5.49	4.012e-08	-?
19_44268543_TTATTATTATTACTAC_T	t	ttattattattactac	36	5.49	4.012e-08	+?
8_21973973_A_C	a	c	36	-5.49	4.012e-08	-?
22_50956943_T_TC	t	tc	36	-5.49	4.012e-08	-?
17_18786057_A_G	a	g	36	-5.49	4.012e-08	-?
2_131671572_G_T	t	g	36	5.49	4.012e-08	+?
17_76557874_G_A	a	g	36	5.49	4.012e-08	+?
1_248201970_G_A	a	g	36	5.49	4.012e-08	+?
15_30378073_G_A	a	g	36	5.49	4.012e-08	+?
10_133981563_G_A	a	g	36	5.49	4.012e-08	+?
10_105197800_G_A	a	g	36	5.49	4.012e-08	+?
22_50313452_C_T	t	c	36	5.49	4.012e-08	+?
14_102510098_C_T	t	c	36	5.49	4.012e-08	+?
19_19637930_A_G	a	g	36	5.49	4.012e-08	+?
4_21698965_G_A	a	g	36	5.49	4.012e-08	+?
18_5197517_T_C	t	c	36	-5.49	4.012e-08	-?
12_3749891_G_A	a	g	36	5.49	4.012e-08	+?
1_164815937_T_C	t	c	36	-5.49	4.012e-08	-?
13_50295975_A_C	a	c	36	-5.49	4.012e-08	-?
8_142867695_G_A	a	g	36	5.49	4.012e-08	+?
1_193074611_C_T	t	c	36	5.49	4.012e-08	+?
19_12222230_G_A	a	g	36	5.49	4.012e-08	+?
17_10632217_C_T	t	c	36	5.49	4.012e-08	+?
11_27384741_T_C	t	c	36	-5.49	4.012e-08	-?
12_96350760_G_A	a	g	36	5.49	4.012e-08	+?
15_30906192_T_C	t	c	36	-5.49	4.012e-08	-?
17_78280264_C_T	t	c	36	5.49	4.012e-08	+?
7_100634386_C_T	t	c	36	5.49	4.012e-08	+?
9_37746585_A_C	a	c	36	-5.49	4.012e-08	-?
19_812564_G_C	c	g	36	5.49	4.012e-08	+?
4_26862568_T_A	a	t	36	5.49	4.012e-08	+?
16_72831111_G_C	c	g	36	5.49	4.012e-08	+?
16_70219837_A_G	a	g	36	-5.49	4.012e-08	-?
6_159028464_C_T	t	c	36	5.49	4.012e-08	+?
7_4841230_G_C	c	g	36	5.49	4.012e-08	+?
4_47886287_G_C	c	g	36	5.49	4.012e-08	+?
5_98860035_A_C	a	c	36	-5.49	4.012e-08	-?
6_110746336_G_A	a	g	36	5.49	4.012e-08	+?
X_53227618_C_T	t	c	36	5.49	4.012e-08	+?
19_8654294_CGCT_C	cgct	c	36	-5.49	4.012e-08	-?
7_138432133_A_T	a	t	36	-5.49	4.012e-08	-?
17_58042074_G_A	a	g	36	5.49	4.012e-08	+?
17_74080322_G_A	a	g	36	5.49	4.012e-08	+?
16_22579568_T_C	t	c	36	-5.49	4.012e-08	-?
20_17610512_C_T	t	c	36	5.49	4.012e-08	+?
20_44587926_A_C	a	c	36	-5.49	4.012e-08	-?
12_113345090_A_G	a	g	36	-5.49	4.012e-08	-?
17_7756211_G_A	a	g	36	5.49	4.012e-08	+?
1_228401070_T_TC	t	tc	36	-5.49	4.012e-08	-?
1_43773039_G_A	a	g	36	5.49	4.012e-08	+?
9_136385327_C_T	t	c	36	5.49	4.012e-08	+?
17_36971021_G_A	a	g	36	5.49	4.012e-08	+?
19_34856723_G_A	a	g	36	5.49	4.012e-08	+?
1_208084424_A_G	a	g	36	-5.49	4.012e-08	-?
14_105344181_G_C	c	g	36	5.49	4.012e-08	+?
11_123431267_G_C	c	g	36	5.49	4.012e-08	+?
1_197641401_G_C	c	g	36	5.49	4.012e-08	+?
X_6451959_C_G	c	g	36	-5.49	4.012e-08	-?
7_100238281_G_C	c	g	36	5.49	4.012e-08	+?
3_134327755_G_T	t	g	36	5.49	4.012e-08	+?
1_231079429_C_T	t	c	36	5.49	4.012e-08	+?
12_93273309_C_A	a	c	36	5.49	4.012e-08	+?
16_69154643_T_C	t	c	36	-5.49	4.012e-08	-?
3_195309433_G_A	a	g	36	5.49	4.012e-08	+?
22_42335147_G_A	a	g	36	5.49	4.012e-08	+?
3_121409654_G_A	a	g	36	5.49	4.012e-08	+?
2_131266613_AGCACCACTTGCCCATCTTGCTCCTGAGTGTCTTCATAGTGGAGTCGTCCTGGTCTCCAGAAGTGCCCACGTTGCTCTTGCCGCTCCCCCTGCAGCAGGGGAAGCAGTGGCG_GGCACCACTTGCCCATCTTGCTCCTGAGTGTCTTCATAGTGGAGTCGTCCTGGTCTCCAGAAGTGCCCACGTTGCTCTTGCCGCTCCCCCTGCAGCAGGGGAAGCAGTGGCG	agcaccacttgcccatcttgctcctgagtgtcttcatagtggagtcgtcctggtctccagaagtgcccacgttgctcttgccgctccccctgcagcaggggaagcagtggcg	ggcaccacttgcccatcttgctcctgagtgtcttcatagtggagtcgtcctggtctccagaagtgcccacgttgctcttgccgctccccctgcagcaggggaagcagtggcg	36	-5.49	4.012e-08	-?
12_41327477_C_T	t	c	36	5.49	4.012e-08	+?
14_73006882_C_T	t	c	36	5.49	4.012e-08	+?
20_4772915_AG_A	a	ag	36	5.49	4.012e-08	+?
15_40468866_C_A	a	c	36	5.49	4.012e-08	+?
14_93118393_G_A	a	g	36	5.49	4.012e-08	+?
2_24345213_C_A	a	c	36	5.49	4.012e-08	+?
6_96984083_G_C	c	g	36	5.49	4.012e-08	+?
9_117092203_C_T	t	c	36	5.49	4.012e-08	+?
7_6803485_G_A	a	g	36	5.49	4.012e-08	+?
20_18448124_C_A	a	c	36	5.49	4.012e-08	+?
19_42729848_T_C	t	c	36	-5.49	4.012e-08	-?
6_109797352_A_G	a	g	36	-5.49	4.012e-08	-?
10_61004817_A_C	a	c	36	-5.49	4.012e-08	-?
19_36029821_T_A	a	t	36	5.49	4.012e-08	+?
2_20320492_G_A	a	g	36	5.49	4.012e-08	+?
15_100332748_T_C	t	c	36	-5.49	4.012e-08	-?
17_44388525_G_A	a	g	36	5.49	4.012e-08	+?
12_103871984_G_A	a	g	36	5.49	4.012e-08	+?
16_22447178_G_A	a	g	36	5.49	4.012e-08	+?
5_173473949_A_C	a	c	36	-5.49	4.012e-08	-?
19_2128989_C_A	a	c	36	5.49	4.012e-08	+?
19_51273962_G_A	a	g	36	5.49	4.012e-08	+?
16_66861908_G_C	c	g	36	5.49	4.012e-08	+?
11_117329204_G_C	c	g	36	5.49	4.012e-08	+?
19_14272131_C_T	t	c	36	5.49	4.012e-08	+?
3_21448204_C_A	a	c	36	5.49	4.012e-08	+?
17_10295914_T_G	t	g	36	-5.49	4.012e-08	-?
7_148463390_A_AT	a	at	36	-5.49	4.012e-08	-?
1_168510366_G_A	a	g	36	5.49	4.012e-08	+?
4_77135396_G_A	a	g	36	5.49	4.012e-08	+?
6_30993954_C_T	t	c	36	5.49	4.012e-08	+?
17_76117147_G_A	a	g	36	5.49	4.012e-08	+?
7_4803923_C_T	t	c	36	5.49	4.012e-08	+?
7_79082286_C_T	t	c	36	5.49	4.012e-08	+?
14_105344185_A_C	a	c	36	-5.49	4.012e-08	-?
22_24180858_T_G	t	g	36	-5.49	4.012e-08	-?
14_105609077_G_A	a	g	36	5.49	4.012e-08	+?
6_26462942_G_A	a	g	36	5.49	4.012e-08	+?
8_70513954_T_C	t	c	36	-5.49	4.012e-08	-?
5_110096992_A_G	a	g	36	-5.49	4.012e-08	-?
2_223916682_G_A	a	g	36	5.49	4.012e-08	+?
6_56481683_T_G	t	g	36	-5.49	4.012e-08	-?
7_72396169_G_C	c	g	36	5.49	4.012e-08	+?
15_85488173_C_A	a	c	36	5.49	4.012e-08	+?
19_1241961_A_G	a	g	36	-5.49	4.012e-08	-?
17_31260237_C_T	t	c	36	5.49	4.012e-08	+?
15_75518922_G_C	c	g	36	5.49	4.012e-08	+?
5_1882473_A_G	a	g	36	-5.49	4.012e-08	-?
6_7900025_G_A	a	g	36	5.49	4.012e-08	+?
12_111729350_C_T	t	c	36	5.49	4.012e-08	+?
4_15724487_T_G	t	g	36	-5.49	4.012e-08	-?
3_46509869_C_A	a	c	36	5.49	4.012e-08	+?
X_107415623_G_A	a	g	36	5.49	4.012e-08	+?
2_160876771_T_C	t	c	36	-5.49	4.012e-08	-?
15_83735454_G_A	a	g	36	5.49	4.012e-08	+?
2_77748603_T_C	t	c	36	-5.49	4.012e-08	-?
2_9143763_G_C	c	g	36	5.49	4.012e-08	+?
2_37229453_G_A	a	g	36	5.49	4.012e-08	+?
2_97531315_C_T	t	c	36	5.49	4.012e-08	+?
10_1175057_C_T	t	c	36	5.49	4.012e-08	+?
Y_19437281_TGAG_T	t	tgag	36	5.49	4.012e-08	+?
15_34782474_G_A	a	g	36	5.49	4.012e-08	+?
4_68459190_T_C	t	c	36	-5.49	4.012e-08	-?
15_65410990_G_A	a	g	36	5.49	4.012e-08	+?
12_56826715_G_A	a	g	36	5.49	4.012e-08	+?
3_112066325_T_A	a	t	36	5.49	4.012e-08	+?
19_42729851_A_C	a	c	36	-5.49	4.012e-08	-?
2_190660727_T_G	t	g	36	-5.49	4.012e-08	-?
20_33045092_G_A	a	g	36	5.49	4.012e-08	+?
2_30968161_C_T	t	c	36	5.49	4.012e-08	+?
5_159344040_C_T	t	c	36	5.49	4.012e-08	+?
19_55146147_GCTC_G	g	gctc	36	5.49	4.012e-08	+?
3_16399111_C_CG	cg	c	36	5.49	4.012e-08	+?
19_10973956_G_A	a	g	36	5.49	4.012e-08	+?
10_72061079_C_T	t	c	36	-5.49	4.012e-08	-?
17_44144214_T_C	t	c	36	-5.49	4.012e-08	-?
5_145252312_G_C	c	g	36	5.49	4.012e-08	+?
6_158735296_G_A	a	g	36	5.49	4.012e-08	+?
11_44956574_GGA_G	g	gga	36	5.49	4.012e-08	+?
3_13432844_G_A	a	g	36	5.49	4.012e-08	+?
5_125953167_T_TTTTA	t	tttta	36	-5.49	4.012e-08	-?
3_46016925_G_A	a	g	36	5.49	4.012e-08	+?
5_38823494_A_G	a	g	36	-5.49	4.012e-08	-?
1_664652_G_A	a	g	36	5.49	4.012e-08	+?
10_81993593_T_C	t	c	36	-5.49	4.012e-08	-?
15_76520364_T_G	t	g	36	-5.49	4.012e-08	-?
6_16129722_G_A	a	g	36	5.49	4.012e-08	+?
6_36926800_C_A	a	c	36	5.49	4.012e-08	+?
22_22901830_C_T	t	c	36	5.49	4.012e-08	+?
13_25889495_G_A	a	g	36	5.49	4.012e-08	+?
12_96915644_C_T	t	c	36	5.49	4.012e-08	+?
1_17036_T_C	t	c	36	-5.49	4.012e-08	-?
8_1087458_C_T	t	c	36	5.49	4.012e-08	+?
5_112258002_G_A	a	g	36	5.49	4.012e-08	+?
4_152567726_A_C	a	c	36	-5.49	4.012e-08	-?
22_18325055_C_T	t	c	36	5.49	4.012e-08	+?
9_140811703_C_T	t	c	36	5.49	4.012e-08	+?
8_120801806_T_C	t	c	36	-5.49	4.012e-08	-?
12_105370934_C_T	t	c	36	5.49	4.012e-08	+?
2_18758142_G_A	a	g	36	5.49	4.012e-08	+?
4_4322570_G_A	a	g	36	5.49	4.012e-08	+?
16_88783582_ATCT_A	a	atct	36	5.49	4.012e-08	+?
1_160262330_T_G	t	g	36	-5.49	4.012e-08	-?
12_49582529_G_C	c	g	36	5.49	4.012e-08	+?
6_152551631_A_G	a	g	36	-5.49	4.012e-08	-?
14_100835596_C_T	t	c	36	5.49	4.012e-08	+?
11_19077366_A_C	a	c	36	-5.49	4.012e-08	-?
2_202550420_T_C	t	c	36	-5.49	4.012e-08	-?
8_142484193_C_T	t	c	36	5.49	4.012e-08	+?
2_47656871_T_C	t	c	36	-5.49	4.012e-08	-?
5_139942506_G_A	a	g	36	5.49	4.012e-08	+?
X_47511452_G_A	a	g	36	5.49	4.012e-08	+?
12_124239029_C_T	t	c	36	5.49	4.012e-08	+?
16_21035992_G_T	t	g	36	5.49	4.012e-08	+?
19_13928849_T_C	t	c	36	-5.49	4.012e-08	-?
22_38508365_G_A	a	g	36	5.49	4.012e-08	+?
6_75804717_A_T	a	t	36	-5.49	4.012e-08	-?
17_30186213_G_T	t	g	36	5.49	4.012e-08	+?
2_29226417_C_T	t	c	36	5.49	4.012e-08	+?
10_11368046_C_T	t	c	36	5.49	4.012e-08	+?
5_125931007_C_A	a	c	36	5.49	4.012e-08	+?
12_96986286_G_A	a	g	36	5.49	4.012e-08	+?
5_178559359_G_A	a	g	36	5.49	4.012e-08	+?
7_44613652_G_A	a	g	36	5.49	4.012e-08	+?
10_15210329_C_G	c	g	36	-5.49	4.012e-08	-?
15_62269192_AATCT_A	a	aatct	36	5.49	4.012e-08	+?
4_186570869_GAATTA_G	g	gaatta	36	5.49	4.012e-08	+?
9_24544893_T_C	t	c	36	-5.49	4.012e-08	-?
11_74914305_G_A	a	g	36	5.49	4.012e-08	+?
1_247287050_G_A	a	g	36	5.49	4.012e-08	+?
16_3108974_A_C	a	c	36	-5.49	4.012e-08	-?
15_81427679_A_G	a	g	36	-5.49	4.012e-08	-?
18_30538125_G_A	a	g	36	5.49	4.012e-08	+?
11_66620909_C_T	t	c	36	5.49	4.012e-08	+?
14_69697203_G_C	c	g	36	5.49	4.012e-08	+?
11_43940775_G_A	a	g	36	5.49	4.012e-08	+?
14_57942425_TA_T	t	ta	36	5.49	4.012e-08	+?
10_73046451_A_G	a	g	36	-5.49	4.012e-08	-?
14_74539123_A_G	a	g	36	-5.49	4.012e-08	-?
5_81571115_C_A	a	c	36	5.49	4.012e-08	+?
7_150085436_G_T	t	g	36	5.49	4.012e-08	+?
4_47455276_A_C	a	c	36	-5.49	4.012e-08	-?
20_1895556_C_A	a	c	36	5.49	4.012e-08	+?
8_122640973_C_T	t	c	36	5.49	4.012e-08	+?
6_151670726_G_A	a	g	36	5.49	4.012e-08	+?
14_106134544_C_G	c	g	36	-5.49	4.012e-08	-?
2_167094721_A_G	a	g	36	-5.49	4.012e-08	-?
7_34182805_T_C	t	c	36	-5.49	4.012e-08	-?
10_124186612_C_T	t	c	36	5.49	4.012e-08	+?
15_85326734_A_G	a	g	36	-5.49	4.012e-08	-?
12_131589353_C_T	t	c	36	5.49	4.012e-08	+?
9_94173026_C_T	t	c	36	5.49	4.012e-08	+?
19_19609529_A_C	a	c	36	-5.49	4.012e-08	-?
3_9432252_T_C	t	c	36	-5.49	4.012e-08	-?
8_145487308_C_T	t	c	36	5.49	4.012e-08	+?
10_73475564_C_T	t	c	36	5.49	4.012e-08	+?
6_96973141_A_T	a	t	36	-5.49	4.012e-08	-?
11_129742768_G_A	a	g	36	5.49	4.012e-08	+?
8_41522370_C_T	t	c	36	5.49	4.012e-08	+?
22_45148743_G_C	c	g	36	5.49	4.012e-08	+?
3_148750169_G_GA	g	ga	36	-5.49	4.012e-08	-?
15_91550599_G_T	t	g	36	5.49	4.012e-08	+?
5_157073747_G_T	t	g	36	5.49	4.012e-08	+?
20_62655672_C_G	c	g	36	-5.49	4.012e-08	-?
15_102296495_G_C	c	g	36	5.49	4.012e-08	+?
19_56813394_C_T	t	c	36	5.49	4.012e-08	+?
8_100844609_C_T	t	c	36	5.49	4.012e-08	+?
20_62853441_C_T	t	c	36	5.49	4.012e-08	+?
16_28837275_G_C	c	g	36	5.49	4.012e-08	+?
17_18069994_G_A	a	g	36	5.49	4.012e-08	+?
15_33445589_C_T	t	c	36	5.49	4.012e-08	+?
2_25375238_C_T	t	c	36	5.49	4.012e-08	+?
2_11772939_C_T	t	c	36	5.49	4.012e-08	+?
21_33362370_G_A	a	g	36	5.49	4.012e-08	+?
17_19290108_G_A	a	g	36	5.49	4.012e-08	+?
6_3456602_C_T	t	c	36	5.49	4.012e-08	+?
5_58272070_T_C	t	c	36	-5.49	4.012e-08	-?
1_176845609_CATAG_C	catag	c	36	-5.49	4.012e-08	-?
2_21225119_C_T	t	c	36	5.49	4.012e-08	+?
1_202155349_G_C	c	g	36	5.49	4.012e-08	+?
16_5075450_C_T	t	c	36	5.49	4.012e-08	+?
16_19058499_C_T	t	c	36	5.49	4.012e-08	+?
6_117860561_G_A	a	g	36	5.49	4.012e-08	+?
1_236187618_C_T	t	c	36	5.49	4.012e-08	+?
7_158439023_T_C	t	c	36	-5.49	4.012e-08	-?
4_104081885_T_C	t	c	36	-5.49	4.012e-08	-?
4_25759107_TGC_TC	tc	tgc	36	5.49	4.012e-08	+?
10_105883980_C_A	a	c	36	5.49	4.012e-08	+?
3_193343781_C_T	t	c	36	5.49	4.012e-08	+?
16_87733941_G_A	a	g	36	5.49	4.012e-08	+?
15_90768389_G_A	a	g	36	5.49	4.012e-08	+?
20_3767741_C_A	a	c	36	5.49	4.012e-08	+?
1_247025087_T_C	t	c	36	-5.49	4.012e-08	-?
3_133878367_C_T	t	c	36	5.49	4.012e-08	+?
1_53699093_C_T	t	c	36	5.49	4.012e-08	+?
7_133943177_C_T	t	c	36	5.49	4.012e-08	+?
9_161674_C_T	t	c	36	5.49	4.012e-08	+?
10_90342697_G_T	t	g	36	5.49	4.012e-08	+?
3_182665193_T_C	t	c	36	-5.49	4.012e-08	-?
20_61961088_G_A	a	g	36	5.49	4.012e-08	+?
1_109756771_G_A	a	g	36	5.49	4.012e-08	+?
1_38033291_C_T	t	c	36	5.49	4.012e-08	+?
17_62888798_G_A	a	g	36	5.49	4.012e-08	+?
14_51100945_A_G	a	g	36	-5.49	4.012e-08	-?
1_145366501_C_A	a	c	36	5.49	4.012e-08	+?
19_39371446_C_T	t	c	36	5.49	4.012e-08	+?
17_34072530_G_C	c	g	36	5.49	4.012e-08	+?
1_16263753_C_T	t	c	36	5.49	4.012e-08	+?
4_26491768_C_T	t	c	36	5.49	4.012e-08	+?
13_21142007_G_GT	g	gt	36	-5.49	4.012e-08	-?
9_77457061_C_A	a	c	36	5.49	4.012e-08	+?
22_36598101_C_T	t	c	36	5.49	4.012e-08	+?
1_39500160_C_T	t	c	36	5.49	4.012e-08	+?
9_139357508_T_C	t	c	36	-5.49	4.012e-08	-?
14_24900501_T_G	t	g	36	-5.49	4.012e-08	-?
12_117627960_T_A	a	t	36	5.49	4.012e-08	+?
5_43493818_T_C	t	c	36	-5.49	4.012e-08	-?
17_56404870_G_A	a	g	36	5.49	4.012e-08	+?
2_44549869_C_A	a	c	36	5.49	4.012e-08	+?
9_86395399_G_A	a	g	36	5.49	4.012e-08	+?
4_114824256_G_A	a	g	36	5.49	4.012e-08	+?
8_73849653_A_G	a	g	36	-5.49	4.012e-08	-?
20_2309025_T_C	t	c	36	-5.49	4.012e-08	-?
20_44803492_A_C	a	c	36	-5.49	4.012e-08	-?
22_50316906_C_T	t	c	36	5.49	4.012e-08	+?
20_31350238_C_T	t	c	36	5.49	4.012e-08	+?
12_1023671_T_G	t	g	36	-5.49	4.012e-08	-?
5_37328569_A_G	a	g	36	-5.49	4.012e-08	-?
12_29510535_C_T	t	c	36	5.49	4.012e-08	+?
16_66966527_C_T	t	c	36	5.49	4.012e-08	+?
11_76890651_G_A	a	g	36	5.49	4.012e-08	+?
16_89985913_T_C	t	c	36	-5.49	4.012e-08	-?
5_67576355_G_A	a	g	36	5.49	4.012e-08	+?
18_44114566_G_A	a	g	36	5.49	4.012e-08	+?
16_4751913_C_T	t	c	36	5.49	4.012e-08	+?
6_312009_C_T	t	c	36	5.49	4.012e-08	+?
14_94069785_C_T	t	c	36	5.49	4.012e-08	+?
2_158156095_A_C	a	c	36	-5.49	4.012e-08	-?
1_11317235_G_C	c	g	36	5.49	4.012e-08	+?
3_184026376_G_A	a	g	36	5.49	4.012e-08	+?
16_77242013_A_C	a	c	36	-5.49	4.012e-08	-?
2_141709295_C_T	t	c	36	5.49	4.012e-08	+?
6_35212276_T_C	t	c	36	-5.49	4.012e-08	-?
4_68214328_A_G	a	g	36	-5.49	4.012e-08	-?
16_69381632_C_T	t	c	36	5.49	4.012e-08	+?
3_194150343_C_T	t	c	36	5.49	4.012e-08	+?
14_64588825_C_A	a	c	36	5.49	4.012e-08	+?
2_42990937_G_A	a	g	36	5.49	4.012e-08	+?
12_120594666_T_C	t	c	36	-5.49	4.012e-08	-?
7_6907118_G_GGAAC	g	ggaac	36	-5.49	4.012e-08	-?
19_5696452_A_G	a	g	36	-5.49	4.012e-08	-?
16_49659988_T_C	t	c	36	-5.49	4.012e-08	-?
3_195453544_A_C	a	c	36	-5.49	4.012e-08	-?
5_67584529_G_T	t	g	36	5.49	4.012e-08	+?
9_35382538_G_T	t	g	36	5.49	4.012e-08	+?
1_181740576_T_A	a	t	36	5.49	4.012e-08	+?
12_113369797_AG_GG	ag	gg	36	-5.49	4.012e-08	-?
2_45806934_A_G	a	g	36	-5.49	4.012e-08	-?
2_189853180_A_G	a	g	36	-5.49	4.012e-08	-?
5_125968215_C_T	t	c	36	5.49	4.012e-08	+?
19_56465982_G_A	a	g	36	5.49	4.012e-08	+?
21_47864583_C_T	t	c	36	5.49	4.012e-08	+?
1_181732031_G_A	a	g	36	5.49	4.012e-08	+?
2_113514026_T_C	t	c	36	-5.49	4.012e-08	-?
9_33166711_C_CG	cg	c	36	5.49	4.012e-08	+?
4_140270602_C_T	t	c	36	5.49	4.012e-08	+?
14_22984559_C_T	t	c	36	5.49	4.012e-08	+?
10_83635012_C_T	t	c	36	5.49	4.012e-08	+?
17_54976502_G_A	a	g	36	5.49	4.012e-08	+?
12_121013496_G_C	c	g	36	5.49	4.012e-08	+?
7_100147970_G_T	t	g	36	5.49	4.012e-08	+?
8_121518884_A_T	a	t	36	-5.49	4.012e-08	-?
19_43268061_C_G	c	g	36	-5.49	4.012e-08	-?
10_5202076_G_A	a	g	36	5.49	4.012e-08	+?
17_55822342_T_G	t	g	36	-5.49	4.012e-08	-?
8_26481822_C_T	t	c	36	5.49	4.012e-08	+?
5_140027823_T_G	t	g	36	-5.49	4.012e-08	-?
X_151302911_G_T	t	g	36	5.49	4.012e-08	+?
11_124621182_A_G	a	g	36	-5.49	4.012e-08	-?
16_12172627_G_A	a	g	36	5.49	4.012e-08	+?
12_48213624_G_T	t	g	36	5.49	4.012e-08	+?
5_126250862_G_A	a	g	36	5.49	4.012e-08	+?
1_237969452_G_A	a	g	36	5.49	4.012e-08	+?
2_46372407_G_A	a	g	36	5.49	4.012e-08	+?
1_108003101_G_A	a	g	36	5.49	4.012e-08	+?
15_44166005_C_T	t	c	36	5.49	4.012e-08	+?
19_33119742_C_T	t	c	36	5.49	4.012e-08	+?
1_160253540_T_C	t	c	36	-5.49	4.012e-08	-?
3_27338698_T_C	t	c	36	-5.49	4.012e-08	-?
12_133353143_G_A	a	g	36	5.49	4.012e-08	+?
19_15121021_AAAAGAAAGAGAGAGAG_A	a	aaaagaaagagagagag	36	5.49	4.012e-08	+?
21_46901709_C_T	t	c	36	5.49	4.012e-08	+?
4_38776788_A_G	a	g	36	-5.49	4.012e-08	-?
17_26732715_T_C	t	c	36	-5.49	4.012e-08	-?
8_7544550_C_T	t	c	36	5.49	4.012e-08	+?
2_28805465_G_A	a	g	36	5.49	4.012e-08	+?
13_103498417_G_C	c	g	36	5.49	4.012e-08	+?
4_17963707_T_C	t	c	36	-5.49	4.012e-08	-?
5_180051071_C_T	t	c	36	5.49	4.012e-08	+?
11_124746486_C_T	t	c	36	5.49	4.012e-08	+?
4_25128874_A_G	a	g	36	-5.49	4.012e-08	-?
20_18396091_C_T	t	c	36	5.49	4.012e-08	+?
15_20450214_C_T	t	c	36	5.49	4.012e-08	+?
11_126135731_G_A	a	g	36	5.49	4.012e-08	+?
3_134250895_A_G	a	g	36	-5.49	4.012e-08	-?
6_160505874_A_T	a	t	36	-5.49	4.012e-08	-?
4_68567014_A_G	a	g	36	-5.49	4.012e-08	-?
5_146029935_C_T	t	c	36	5.49	4.012e-08	+?
16_50334740_C_T	t	c	36	5.49	4.012e-08	+?
4_46264078_A_T	a	t	36	-5.49	4.012e-08	-?
22_22989555_C_A	a	c	36	5.49	4.012e-08	+?
2_113958973_G_A	a	g	36	5.49	4.012e-08	+?
17_39923625_G_A	a	g	36	5.49	4.012e-08	+?
7_129962556_C_G	c	g	36	-5.49	4.012e-08	-?
9_90272757_C_G	c	g	36	-5.49	4.012e-08	-?
1_6593172_A_T	a	t	36	-5.49	4.012e-08	-?
6_56911404_G_C	c	g	36	5.49	4.012e-08	+?
1_182922000_TCCG_T	t	tccg	36	5.49	4.012e-08	+?
6_83892649_C_T	t	c	36	5.49	4.012e-08	+?
10_61830475_G_A	a	g	36	5.49	4.012e-08	+?
17_32964975_G_T	t	g	36	5.49	4.012e-08	+?
19_49638190_GC_G	g	gc	36	5.49	4.012e-08	+?
18_5960056_T_C	t	c	36	-5.49	4.012e-08	-?
15_91493210_T_C	t	c	36	-5.49	4.012e-08	-?
19_40148564_C_T	t	c	36	5.49	4.012e-08	+?
19_579501_C_T	t	c	36	5.49	4.012e-08	+?
3_153202484_C_T	t	c	36	5.49	4.012e-08	+?
X_38145166_TCCTCCCCTTCCA_T	t	tcctccccttcca	36	5.49	4.012e-08	+?
4_83796838_T_C	t	c	36	-5.49	4.012e-08	-?
12_645364_G_A	a	g	36	5.49	4.012e-08	+?
11_119181707_G_A	a	g	36	5.49	4.012e-08	+?
6_52109386_G_A	a	g	36	5.49	4.012e-08	+?
2_220087088_T_G	t	g	36	-5.49	4.012e-08	-?
20_44665863_C_A	a	c	36	5.49	4.012e-08	+?
22_51177957_G_T	t	g	36	5.49	4.012e-08	+?
22_41359842_T_C	t	c	36	-5.49	4.012e-08	-?
7_55220195_T_C	t	c	36	-5.49	4.012e-08	-?
9_13408394_A_T	a	t	36	-5.49	4.012e-08	-?
22_50212093_A_C	a	c	36	-5.49	4.012e-08	-?
17_61957990_G_A	a	g	36	5.49	4.012e-08	+?
4_47916251_T_G	t	g	36	-5.49	4.012e-08	-?
3_130120457_C_T	t	c	36	5.49	4.012e-08	+?
7_154379952_C_T	t	c	36	5.49	4.012e-08	+?
19_9066469_T_C	t	c	36	-5.49	4.012e-08	-?
15_27018841_G_A	a	g	36	5.49	4.012e-08	+?
19_55236676_G_GGGCC	g	gggcc	36	-5.49	4.012e-08	-?
16_15847419_C_T	t	c	36	5.49	4.012e-08	+?
9_126132760_T_G	t	g	36	-5.49	4.012e-08	-?
16_88505287_G_C	c	g	36	5.49	4.012e-08	+?
15_75949206_G_A	a	g	36	5.49	4.012e-08	+?
11_93844459_G_A	a	g	36	5.49	4.012e-08	+?
17_7758522_C_T	t	c	36	5.49	4.012e-08	+?
19_17166907_G_A	a	g	36	5.49	4.012e-08	+?
9_3275625_C_G	c	g	36	-5.49	4.012e-08	-?
11_1264896_C_T	t	c	36	5.49	4.012e-08	+?
3_46491584_A_G	a	g	36	-5.49	4.012e-08	-?
19_44174249_C_T	t	c	36	5.49	4.012e-08	+?
4_21698966_T_A	a	t	36	5.49	4.012e-08	+?
2_186666026_T_A	a	t	36	5.49	4.012e-08	+?
17_10533050_T_C	t	c	36	-5.49	4.012e-08	-?
19_51504128_C_CT	ct	c	36	5.49	4.012e-08	+?
3_97926707_G_A	a	g	36	5.49	4.012e-08	+?
11_829476_G_A	a	g	36	5.49	4.012e-08	+?
21_46687469_G_A	a	g	36	5.49	4.012e-08	+?
17_81082367_C_G	c	g	36	-5.49	4.012e-08	-?
2_170094432_C_T	t	c	36	5.49	4.012e-08	+?
19_812541_G_GC	g	gc	36	-5.49	4.012e-08	-?
5_151126135_C_T	t	c	36	5.49	4.012e-08	+?
17_80403713_C_T	t	c	36	5.49	4.012e-08	+?
6_43482862_G_A	a	g	36	5.49	4.012e-08	+?
1_32158838_T_C	t	c	36	-5.49	4.012e-08	-?
13_30071265_C_T	t	c	36	5.49	4.012e-08	+?
19_46124517_C_T	t	c	36	5.49	4.012e-08	+?
12_122691955_C_T	t	c	36	5.49	4.012e-08	+?
8_6390082_T_C	t	c	36	-5.49	4.012e-08	-?
2_87018022_C_G	c	g	36	-5.49	4.012e-08	-?
11_70170346_C_T	t	c	36	5.49	4.012e-08	+?
11_640187_C_G	c	g	36	-5.49	4.012e-08	-?
15_23264156_G_C	c	g	36	5.49	4.012e-08	+?
3_46539807_G_A	a	g	36	5.49	4.012e-08	+?
16_83945776_TG_T	t	tg	36	5.49	4.012e-08	+?
17_18668040_G_C	c	g	36	5.49	4.012e-08	+?
12_56396504_G_T	t	g	36	5.49	4.012e-08	+?
1_183533001_T_G	t	g	36	-5.49	4.012e-08	-?
10_115355293_CT_C	ct	c	36	-5.49	4.012e-08	-?
6_30954700_A_C	a	c	36	-5.49	4.012e-08	-?
14_75139613_C_T	t	c	36	5.49	4.012e-08	+?
7_4829831_CCTT_C	cctt	c	36	-5.49	4.012e-08	-?
15_66824573_C_T	t	c	36	5.49	4.012e-08	+?
6_57188949_C_G	c	g	36	-5.49	4.012e-08	-?
9_104162083_A_G	a	g	36	-5.49	4.012e-08	-?
12_113901431_C_T	t	c	36	5.49	4.012e-08	+?
4_1388848_A_G	a	g	36	-5.49	4.012e-08	-?
8_36780751_G_A	a	g	36	5.49	4.012e-08	+?
12_21196579_G_A	a	g	36	5.49	4.012e-08	+?
1_16383897_C_T	t	c	36	5.49	4.012e-08	+?
15_99544392_G_C	c	g	36	5.49	4.012e-08	+?
15_74363298_T_G	t	g	36	-5.49	4.012e-08	-?
19_17004199_G_A	a	g	36	5.49	4.012e-08	+?
3_10861384_T_C	t	c	36	-5.49	4.012e-08	-?
6_56480981_T_C	t	c	36	-5.49	4.012e-08	-?
6_32486958_C_T	t	c	36	5.49	4.012e-08	+?
5_167576288_T_G	t	g	36	-5.49	4.012e-08	-?
12_12630392_G_A	a	g	36	5.49	4.012e-08	+?
14_64595154_G_A	a	g	36	5.49	4.012e-08	+?
19_44319882_TTTTTA_T	t	ttttta	36	5.49	4.012e-08	+?
16_46552446_TAA_T	t	taa	36	5.49	4.012e-08	+?
19_9453191_G_A	a	g	36	5.49	4.012e-08	+?
2_241536147_G_A	a	g	36	5.49	4.012e-08	+?
6_66112357_A_G	a	g	36	-5.49	4.012e-08	-?
4_189018454_A_G	a	g	36	-5.49	4.012e-08	-?
14_104471858_G_A	a	g	36	5.49	4.012e-08	+?
3_195393015_G_A	a	g	36	5.49	4.012e-08	+?
20_4053518_C_CACAT	cacat	c	36	5.49	4.012e-08	+?
17_47246916_C_T	t	c	36	5.49	4.012e-08	+?
5_79025290_G_A	a	g	36	5.49	4.012e-08	+?
7_138958924_C_G	c	g	36	-5.49	4.012e-08	-?
10_90356273_G_A	a	g	36	5.49	4.012e-08	+?
11_94862328_G_A	a	g	36	5.49	4.012e-08	+?
17_34264808_G_A	a	g	36	5.49	4.012e-08	+?
11_615497_AC_A	a	ac	36	5.49	4.012e-08	+?
17_58531819_A_G	a	g	36	-5.49	4.012e-08	-?
8_57130016_A_G	a	g	36	-5.49	4.012e-08	-?
4_185941698_C_T	t	c	36	5.49	4.012e-08	+?
3_9099863_G_A	a	g	36	5.49	4.012e-08	+?
14_28102355_T_G	t	g	36	-5.49	4.012e-08	-?
15_91557052_C_A	a	c	36	5.49	4.012e-08	+?
7_4876179_G_A	a	g	36	5.49	4.012e-08	+?
19_48249127_C_A	a	c	36	5.49	4.012e-08	+?
X_79699068_A_G	a	g	36	-5.49	4.012e-08	-?
6_132966093_C_T	t	c	36	5.49	4.012e-08	+?
1_21944439_C_T	t	c	36	5.49	4.012e-08	+?
16_17353472_C_A	a	c	36	5.49	4.012e-08	+?
2_223917271_C_T	t	c	36	5.49	4.012e-08	+?
9_117086367_C_T	t	c	36	5.49	4.012e-08	+?
9_106875644_A_G	a	g	36	-5.49	4.012e-08	-?
13_96242379_T_C	t	c	36	-5.49	4.012e-08	-?
1_35477368_C_A	a	c	36	5.49	4.012e-08	+?
15_85197516_G_A	a	g	36	5.49	4.012e-08	+?
13_32977829_G_A	a	g	36	5.49	4.012e-08	+?
7_22896347_C_A	a	c	36	5.49	4.012e-08	+?
22_31952811_G_A	a	g	36	5.49	4.012e-08	+?
8_53599595_C_T	t	c	36	5.49	4.012e-08	+?
17_74733349_G_A	a	g	36	5.49	4.012e-08	+?
12_6438918_C_T	t	c	36	5.49	4.012e-08	+?
11_62638213_G_T	t	g	36	5.49	4.012e-08	+?
3_169835268_A_G	a	g	36	-5.49	4.012e-08	-?
21_37636288_C_T	t	c	36	5.49	4.012e-08	+?
4_156784665_C_T	t	c	36	5.49	4.012e-08	+?
6_135726210_A_T	a	t	36	-5.49	4.012e-08	-?
8_142221794_C_A	a	c	36	5.49	4.012e-08	+?
6_44149205_C_A	a	c	36	5.49	4.012e-08	+?
1_110882536_A_G	a	g	36	-5.49	4.012e-08	-?
12_133148887_C_T	t	c	36	5.49	4.012e-08	+?
19_5587096_A_AT	a	at	36	-5.49	4.012e-08	-?
1_36181813_G_C	c	g	36	5.49	4.012e-08	+?
15_75586433_G_T	t	g	36	5.49	4.012e-08	+?
16_21416603_C_T	t	c	36	5.49	4.012e-08	+?
6_335343_C_T	t	c	36	5.49	4.012e-08	+?
X_102755560_G_A	a	g	36	5.49	4.012e-08	+?
4_39501738_AAAT_A	a	aaat	36	5.49	4.012e-08	+?
7_75618503_C_T	t	c	36	5.49	4.012e-08	+?
16_24800521_T_G	t	g	36	-5.49	4.012e-08	-?
5_99727192_C_T	t	c	36	5.49	4.012e-08	+?
15_22850806_C_T	t	c	36	5.49	4.012e-08	+?
1_54477765_A_G	a	g	36	-5.49	4.012e-08	-?
4_5858103_A_G	a	g	36	-5.49	4.012e-08	-?
1_111893794_T_TTG	t	ttg	36	-5.49	4.012e-08	-?
22_24035129_C_T	t	c	36	5.49	4.012e-08	+?
10_84586993_G_T	t	g	36	5.49	4.012e-08	+?
6_160211676_T_C	t	c	36	-5.49	4.012e-08	-?
1_33231458_G_A	a	g	36	5.49	4.012e-08	+?
17_71192497_T_G	t	g	36	-5.49	4.012e-08	-?
7_6472350_A_G	a	g	36	-5.49	4.012e-08	-?
22_41257877_T_G	t	g	36	-5.49	4.012e-08	-?
8_7195630_G_A	a	g	36	5.49	4.012e-08	+?
2_189870199_T_G	t	g	36	-5.49	4.012e-08	-?
10_127548594_A_G	a	g	36	-5.49	4.012e-08	-?
5_35644537_C_T	t	c	36	5.49	4.012e-08	+?
9_397016_A_G	a	g	36	-5.49	4.012e-08	-?
16_20488661_G_A	a	g	36	5.49	4.012e-08	+?
15_40282625_T_C	t	c	36	5.49	4.012e-08	+?
20_3146915_T_C	t	c	36	-5.49	4.012e-08	-?
10_69750169_C_A	a	c	36	5.49	4.012e-08	+?
10_38740607_C_T	t	c	36	5.49	4.012e-08	+?
4_146823565_A_G	a	g	36	-5.49	4.012e-08	-?
19_11356356_C_G	c	g	36	-5.49	4.012e-08	-?
7_105516084_A_C	a	c	36	-5.49	4.012e-08	-?
17_36926834_G_A	a	g	36	5.49	4.012e-08	+?
1_68952780_T_C	t	c	36	-5.49	4.012e-08	-?
17_1961400_C_T	t	c	36	5.49	4.012e-08	+?
1_207140901_G_T	t	g	36	5.49	4.012e-08	+?
7_84629153_G_A	a	g	36	5.49	4.012e-08	+?
19_32873706_C_T	t	c	36	5.49	4.012e-08	+?
16_57007471_T_C	t	c	36	-5.49	4.012e-08	-?
4_120419979_C_CA	ca	c	36	5.49	4.012e-08	+?
7_45697287_A_G	a	g	36	-5.49	4.012e-08	-?
2_101179322_A_G	a	g	36	-5.49	4.012e-08	-?
12_88177515_CGCTGCGCTGCACAGCAAAT_C	cgctgcgctgcacagcaaat	c	36	-5.49	4.012e-08	-?
16_33781495_A_C	a	c	36	-5.49	4.012e-08	-?
17_78972288_C_CAAG	caag	c	36	5.49	4.012e-08	+?
10_95429651_A_G	a	g	36	-5.49	4.012e-08	-?
7_149519903_C_T	t	c	36	5.49	4.012e-08	+?
20_55213082_G_A	a	g	36	5.49	4.012e-08	+?
18_57364535_C_A	a	c	36	5.49	4.012e-08	+?
9_140128706_C_T	t	c	36	5.49	4.012e-08	+?
2_114204962_G_A	a	g	36	5.49	4.012e-08	+?
12_50042022_T_C	t	c	36	-5.49	4.012e-08	-?
13_101308796_C_CT	ct	c	36	5.49	4.012e-08	+?
11_811853_C_T	t	c	36	5.49	4.012e-08	+?
15_101593314_T_C	t	c	36	-5.49	4.012e-08	-?
12_4853740_G_A	a	g	36	5.49	4.012e-08	+?
6_112461893_A_G	a	g	36	-5.49	4.012e-08	-?
9_139397410_T_G	t	g	36	-5.49	4.012e-08	-?
17_30195345_T_G	t	g	36	-5.49	4.012e-08	-?
9_140851344_C_T	t	c	36	5.49	4.012e-08	+?
17_27425854_C_T	t	c	36	5.49	4.012e-08	+?
12_30848705_A_C	a	c	36	-5.49	4.012e-08	-?
4_57180474_T_G	t	g	36	-5.49	4.012e-08	-?
4_15724334_G_A	a	g	36	5.49	4.012e-08	+?
1_79115967_G_GT	g	gt	36	-5.49	4.012e-08	-?
2_242576453_CG_C	cg	c	36	-5.49	4.012e-08	-?
13_96274774_T_C	t	c	36	-5.49	4.012e-08	-?
18_64200071_A_G	a	g	36	-5.49	4.012e-08	-?
9_140139757_G_A	a	g	36	-5.49	4.012e-08	-?
11_92623197_GAA_G	g	gaa	36	5.49	4.012e-08	+?
8_145107795_G_A	a	g	36	-5.49	4.012e-08	-?
19_42729857_A_C	a	c	36	-5.49	4.012e-08	-?
4_146077046_A_T	a	t	36	-5.49	4.012e-08	-?
12_118533551_G_A	a	g	36	5.49	4.012e-08	+?
13_32808570_A_G	a	g	36	-5.49	4.012e-08	-?
19_14582345_C_G	c	g	36	-5.49	4.012e-08	-?
9_100056350_G_T	t	g	36	5.49	4.012e-08	+?
7_4827116_C_CA	ca	c	36	5.49	4.012e-08	+?
3_42734597_C_G	c	g	36	-5.49	4.012e-08	-?
22_41973417_C_T	t	c	36	5.49	4.012e-08	+?
12_125621219_G_A	a	g	36	5.49	4.012e-08	+?
4_15733297_A_G	a	g	36	-5.49	4.012e-08	-?
2_234368468_C_T	t	c	36	5.49	4.012e-08	+?
5_70930930_C_G	c	g	36	-5.49	4.012e-08	-?
7_100385487_TCTCA_T	t	tctca	36	5.49	4.012e-08	+?
5_177236529_G_A	a	g	36	5.49	4.012e-08	+?
2_44186257_GGAT_G	g	ggat	36	5.49	4.012e-08	+?
1_202933556_A_T	a	t	36	-5.49	4.012e-08	-?
2_163054299_A_C	a	c	36	-5.49	4.012e-08	-?
17_78354612_G_A	a	g	36	5.49	4.012e-08	+?
1_22205673_G_A	a	g	36	5.49	4.012e-08	+?
6_144104478_T_A	a	t	36	5.49	4.012e-08	+?
16_67854875_T_C	t	c	36	-5.49	4.012e-08	-?
19_15783979_C_G	c	g	36	-5.49	4.012e-08	-?
1_26655304_C_G	c	g	36	-5.49	4.012e-08	-?
15_22862890_T_C	t	c	36	-5.49	4.012e-08	-?
5_132440205_G_A	a	g	36	5.49	4.012e-08	+?
11_65036062_C_A	a	c	36	5.49	4.012e-08	+?
12_42592839_T_C	t	c	36	-5.49	4.012e-08	-?
20_18396208_TTTTTG_T	t	tttttg	36	5.49	4.012e-08	+?
19_9024640_G_A	a	g	36	5.49	4.012e-08	+?
2_26712405_G_C	c	g	36	5.49	4.012e-08	+?
8_27358389_G_A	a	g	36	5.49	4.012e-08	+?
5_132437231_G_T	t	g	36	5.49	4.012e-08	+?
16_23113657_C_CCTTCAGGCCTAAATATTT	ccttcaggcctaaatattt	c	36	5.49	4.012e-08	+?
19_58421182_G_A	a	g	36	5.49	4.012e-08	+?
7_6205493_G_A	a	g	36	5.49	4.012e-08	+?
9_140509096_G_A	a	g	36	5.49	4.012e-08	+?
19_4047969_C_T	t	c	36	5.49	4.012e-08	+?
1_204095266_C_T	t	c	36	5.49	4.012e-08	+?
X_107415621_G_A	a	g	36	5.49	4.012e-08	+?
7_4876294_C_T	t	c	36	5.49	4.012e-08	+?
19_16024762_C_T	t	c	36	5.49	4.012e-08	+?
10_16795037_G_C	c	g	36	5.49	4.012e-08	+?
17_79769503_G_A	a	g	36	5.49	4.012e-08	+?
8_125834117_T_G	t	g	36	-5.49	4.012e-08	-?
10_1599259_T_C	t	c	36	-5.49	4.012e-08	-?
15_89870132_A_G	a	g	36	-5.49	4.012e-08	-?
2_114204924_T_C	t	c	36	-5.49	4.012e-08	-?
17_1553906_C_CA	ca	c	36	5.49	4.012e-08	+?
7_76167995_A_G	a	g	36	-5.49	4.012e-08	-?
19_52023645_T_C	t	c	36	-5.49	4.012e-08	-?
3_184095976_C_T	t	c	36	5.49	4.012e-08	+?
2_113033471_G_A	a	g	36	5.49	4.012e-08	+?
12_13153222_TAGAGGCAGGGGCC_T	t	tagaggcaggggcc	36	5.49	4.012e-08	+?
15_69689441_G_C	c	g	36	5.49	4.012e-08	+?
20_33997274_A_AG	a	ag	36	-5.49	4.012e-08	-?
4_36118886_C_T	t	c	36	5.49	4.012e-08	+?
4_140651490_C_T	t	c	36	5.49	4.012e-08	+?
7_6907119_CAGGT_C	caggt	c	36	-5.49	4.012e-08	-?
20_54972119_G_A	a	g	36	5.49	4.012e-08	+?
2_189348274_T_C	t	c	36	-5.49	4.012e-08	-?
14_105695254_G_A	a	g	36	5.49	4.012e-08	+?
2_25384169_G_A	a	g	36	5.49	4.012e-08	+?
2_225422623_C_A	a	c	36	5.49	4.012e-08	+?
18_29450605_T_C	t	c	36	-5.49	4.012e-08	-?
12_117684915_A_AT	a	at	36	-5.49	4.012e-08	-?
2_220155459_C_A	a	c	36	5.49	4.012e-08	+?
16_15109826_C_G	c	g	36	-5.49	4.012e-08	-?
1_168278187_A_G	a	g	36	-5.49	4.012e-08	-?
1_180283709_G_GT	g	gt	36	-5.49	4.012e-08	-?
3_123663898_A_C	a	c	36	-5.49	4.012e-08	-?
15_102301325_G_C	c	g	36	5.49	4.012e-08	+?
10_75528576_C_T	t	c	36	5.49	4.012e-08	+?
12_54765472_G_A	a	g	36	5.49	4.012e-08	+?
6_35108394_G_C	c	g	36	5.49	4.012e-08	+?
19_1366105_A_C	a	c	36	-5.49	4.012e-08	-?
15_31092407_A_G	a	g	36	-5.49	4.012e-08	-?
18_21127932_A_G	a	g	36	-5.49	4.012e-08	-?
3_119109769_C_T	t	c	36	5.49	4.012e-08	+?
1_41218957_A_T	a	t	36	-5.49	4.012e-08	-?
8_145623005_G_A	a	g	36	5.49	4.012e-08	+?
5_1330370_G_A	a	g	36	5.49	4.012e-08	+?
15_100348615_A_G	a	g	36	-5.49	4.012e-08	-?
19_45731093_C_G	c	g	36	-5.49	4.012e-08	-?
1_149876644_G_A	a	g	36	5.49	4.012e-08	+?
7_97482741_T_C	t	c	36	-5.49	4.012e-08	-?
9_107564178_T_C	t	c	36	-5.49	4.012e-08	-?
1_152084027_TCTC_T	t	tctc	36	5.49	4.012e-08	+?
6_39387619_A_G	a	g	36	-5.49	4.012e-08	-?
8_103845372_G_A	a	g	36	5.49	4.012e-08	+?
1_63153964_G_C	c	g	36	5.49	4.012e-08	+?
15_78635875_A_T	a	t	36	-5.49	4.012e-08	-?
7_4825344_C_CG	cg	c	36	5.49	4.012e-08	+?
22_24040735_G_A	a	g	36	5.49	4.012e-08	+?
12_58218630_C_T	t	c	36	5.49	4.012e-08	+?
11_82571138_T_C	t	c	36	-5.49	4.012e-08	-?
16_71416485_C_T	t	c	36	5.49	4.012e-08	+?
21_33355709_G_A	a	g	36	5.49	4.012e-08	+?
18_61077467_T_A	a	t	36	5.49	4.012e-08	+?
10_90356555_A_T	a	t	36	-5.49	4.012e-08	-?
12_124840191_C_T	t	c	36	5.49	4.012e-08	+?
2_202073764_C_CTTT	cttt	c	36	5.49	4.012e-08	+?
10_127789615_T_C	t	c	36	-5.49	4.012e-08	-?
17_44388524_G_A	a	g	36	5.49	4.012e-08	+?
12_26221531_A_C	a	c	36	-5.49	4.012e-08	-?
2_27439872_A_G	a	g	36	-5.49	4.012e-08	-?
8_22058597_T_C	t	c	36	-5.49	4.012e-08	-?
5_175795183_G_T	t	g	36	5.49	4.012e-08	+?
19_58946103_G_A	a	g	36	5.49	4.012e-08	+?
11_105929755_T_C	t	c	36	-5.49	4.012e-08	-?
19_49558370_C_T	t	c	36	5.49	4.012e-08	+?
11_65664102_G_A	a	g	36	5.49	4.012e-08	+?
12_21467417_A_G	a	g	36	-5.49	4.012e-08	-?
5_73168758_T_G	t	g	36	-5.49	4.012e-08	-?
16_87448779_A_G	a	g	36	-5.49	4.012e-08	-?
17_4436362_C_T	t	c	36	5.49	4.012e-08	+?
19_14049106_C_T	t	c	36	5.49	4.012e-08	+?
16_1550549_G_A	a	g	36	5.49	4.012e-08	+?
17_56393297_G_GATGA	g	gatga	36	-5.49	4.012e-08	-?
15_23572466_T_C	t	c	36	-5.49	4.012e-08	-?
7_97614356_C_T	t	c	36	5.49	4.012e-08	+?
12_464388_G_T	t	g	36	5.49	4.012e-08	+?
11_902002_A_C	a	c	36	-5.49	4.012e-08	-?
12_124497113_A_G	a	g	36	-5.49	4.012e-08	-?
X_76875758_T_C	t	c	36	-5.49	4.012e-08	-?
22_43466441_G_A	a	g	36	5.49	4.012e-08	+?
12_21428246_A_C	a	c	36	-5.49	4.012e-08	-?
10_44141723_C_T	t	c	36	5.49	4.012e-08	+?
2_162757321_G_A	a	g	36	5.49	4.012e-08	+?
X_151904353_C_G	c	g	36	-5.49	4.012e-08	-?
10_43977327_C_T	t	c	36	5.49	4.012e-08	+?
1_240370998_A_AGGAATACCTCCTCCACCCCCTCTACCCGGAGCG	a	aggaatacctcctccaccccctctacccggagcg	36	-5.49	4.012e-08	-?
1_34068136_G_A	a	g	36	5.49	4.012e-08	+?
19_35578065_T_C	t	c	36	-5.49	4.012e-08	-?
12_40668909_T_G	t	g	36	-5.49	4.012e-08	-?
3_137805896_C_G	c	g	36	-5.49	4.012e-08	-?
5_154134890_C_G	c	g	36	-5.49	4.012e-08	-?
15_40453380_A_G	a	g	36	-5.49	4.012e-08	-?
6_17669733_T_C	t	c	36	-5.49	4.012e-08	-?
8_79672398_G_A	a	g	36	5.49	4.012e-08	+?
12_25254732_A_G	a	g	36	-5.49	4.012e-08	-?
9_95290084_C_T	t	c	36	5.49	4.012e-08	+?
17_900479_G_C	c	g	36	5.49	4.012e-08	+?
6_88234188_C_T	t	c	36	5.49	4.012e-08	+?
22_42462716_T_C	t	c	36	-5.49	4.012e-08	-?
1_46501184_G_A	a	g	36	5.49	4.012e-08	+?
21_47983877_T_A	a	t	36	5.49	4.012e-08	+?
11_34644035_C_T	t	c	36	5.49	4.012e-08	+?
3_46307313_A_G	a	g	36	-5.49	4.012e-08	-?
17_3721547_A_C	a	c	36	-5.49	4.012e-08	-?
11_119243713_G_A	a	g	36	5.49	4.012e-08	+?
12_120632246_C_T	t	c	36	5.49	4.012e-08	+?
8_105264022_A_G	a	g	36	-5.49	4.012e-08	-?
3_98110009_C_T	t	c	36	5.49	4.012e-08	+?
12_56572615_T_C	t	c	36	-5.49	4.012e-08	-?
13_99038001_C_T	t	c	36	5.49	4.012e-08	+?
12_29640943_G_A	a	g	36	5.49	4.012e-08	+?
11_65429686_G_A	a	g	36	5.49	4.012e-08	+?
12_15264272_A_G	a	g	36	-5.49	4.012e-08	-?
1_32158841_A_C	a	c	36	-5.49	4.012e-08	-?
8_7195467_C_T	t	c	36	5.49	4.012e-08	+?
16_29395388_G_C	c	g	36	5.49	4.012e-08	+?
7_145692066_C_T	t	c	36	5.49	4.012e-08	+?
2_228157954_G_A	a	g	36	5.49	4.012e-08	+?
19_17732884_G_C	c	g	36	5.49	4.012e-08	+?
8_11615980_C_G	c	g	36	-5.49	4.012e-08	-?
18_47480455_T_C	t	c	36	-5.49	4.012e-08	-?
22_29383244_C_T	t	c	36	5.49	4.012e-08	+?
19_16908826_T_C	t	c	36	-5.49	4.012e-08	-?
9_33135537_G_A	a	g	36	5.49	4.012e-08	+?
X_151302912_A_T	a	t	36	-5.49	4.012e-08	-?
4_4281145_A_G	a	g	36	-5.49	4.012e-08	-?
1_38304444_G_A	a	g	36	5.49	4.012e-08	+?
21_47548940_G_A	a	g	36	5.49	4.012e-08	+?
19_43763190_G_A	a	g	36	5.49	4.012e-08	+?
11_764070_T_C	t	c	36	-5.49	4.012e-08	-?
17_79862618_G_A	a	g	36	5.49	4.012e-08	+?
19_9075466_T_G	t	g	36	-5.49	4.012e-08	-?
5_172659905_AGGC_A	a	aggc	36	5.49	4.012e-08	+?
16_55522267_C_G	c	g	36	-5.49	4.012e-08	-?
7_142566233_A_G	a	g	36	-5.49	4.012e-08	-?
15_79184822_AAGTT_A	a	aagtt	36	5.49	4.012e-08	+?
1_120384066_C_T	t	c	36	5.49	4.012e-08	+?
6_90339276_C_T	t	c	36	5.49	4.012e-08	+?
11_76909678_C_G	c	g	36	-5.49	4.012e-08	-?
14_39763224_G_T	t	g	36	5.49	4.012e-08	+?
3_195612460_T_C	t	c	36	-5.49	4.012e-08	-?
2_234377244_C_T	t	c	36	5.49	4.012e-08	+?
15_63000600_G_A	a	g	36	5.49	4.012e-08	+?
19_13418599_A_G	a	g	36	-5.49	4.012e-08	-?
14_70490222_G_A	a	g	36	5.49	4.012e-08	+?
13_99512569_C_G	c	g	36	-5.49	4.012e-08	-?
7_123516973_A_G	a	g	36	-5.49	4.012e-08	-?
7_4827437_G_C	c	g	36	5.49	4.012e-08	+?
8_122626131_C_T	t	c	36	5.49	4.012e-08	+?
4_62758425_C_T	t	c	36	5.49	4.012e-08	+?
3_40231688_G_A	a	g	36	5.49	4.012e-08	+?
5_142680019_T_C	t	c	36	-5.49	4.012e-08	-?
17_8076877_G_A	a	g	36	5.49	4.012e-08	+?
7_143510194_C_T	t	c	36	5.49	4.012e-08	+?
19_13352186_GGACA_G	g	ggaca	36	5.49	4.012e-08	+?
1_12030946_T_G	t	g	36	-5.49	4.012e-08	-?
11_2189967_C_G	c	g	36	-5.49	4.012e-08	-?
12_12221257_C_A	a	c	36	5.49	4.012e-08	+?
19_9064562_C_T	t	c	36	5.49	4.012e-08	+?
19_36110486_G_GC	g	gc	36	-5.49	4.012e-08	-?
5_150425745_T_C	t	c	36	-5.49	4.012e-08	-?
9_38527248_C_T	t	c	36	5.49	4.012e-08	+?
20_34215445_A_G	a	g	36	-5.49	4.012e-08	-?
21_47985674_G_A	a	g	36	5.49	4.012e-08	+?
2_116283665_G_A	a	g	36	5.49	4.012e-08	+?
9_107572024_G_A	a	g	36	5.49	4.012e-08	+?
7_38948868_C_T	t	c	36	5.49	4.012e-08	+?
2_114340631_A_G	a	g	36	-5.49	4.012e-08	-?
10_90750624_C_A	a	c	36	5.49	4.012e-08	+?
10_75884171_T_G	t	g	36	-5.49	4.012e-08	-?
19_17100412_A_G	a	g	36	-5.49	4.012e-08	-?
8_12032471_T_G	t	g	36	-5.49	4.012e-08	-?
1_82436294_C_G	c	g	36	-5.49	4.012e-08	-?
19_17351440_G_A	a	g	36	5.49	4.012e-08	+?
19_15770356_G_A	a	g	36	5.49	4.012e-08	+?
1_1273613_CT_C	ct	c	36	-5.49	4.012e-08	-?
20_44569202_G_A	a	g	36	5.49	4.012e-08	+?
4_185724503_C_T	t	c	36	5.49	4.012e-08	+?
19_39096484_A_AC	a	ac	36	-5.49	4.012e-08	-?
3_27431760_T_G	t	g	36	-5.49	4.012e-08	-?
11_46385736_T_A	a	t	36	5.49	4.012e-08	+?
19_47105651_T_G	t	g	36	-5.49	4.012e-08	-?
16_2819199_G_A	a	g	36	5.49	4.012e-08	+?
7_6414545_C_T	t	c	36	5.49	4.012e-08	+?
6_117010499_A_G	a	g	36	-5.49	4.012e-08	-?
10_115805331_G_C	c	g	36	5.49	4.012e-08	+?
9_127951266_A_G	a	g	36	-5.49	4.012e-08	-?
21_10606998_C_T	t	c	36	5.49	4.012e-08	+?
3_131254230_T_A	a	t	36	5.49	4.012e-08	+?
8_62430000_A_G	a	g	36	-5.49	4.012e-08	-?
16_70719775_G_T	t	g	36	5.49	4.012e-08	+?
17_76113291_G_A	a	g	36	5.49	4.012e-08	+?
12_52451038_G_A	a	g	36	5.49	4.012e-08	+?
2_73676961_C_G	c	g	36	-5.49	4.012e-08	-?
15_51791562_T_C	t	c	36	-5.49	4.012e-08	-?
22_24656167_T_G	t	g	36	-5.49	4.012e-08	-?
4_13606167_T_C	t	c	36	-5.49	4.012e-08	-?
15_72072885_A_T	a	t	36	-5.49	4.012e-08	-?
16_88710035_T_C	t	c	36	-5.49	4.012e-08	-?
12_133732236_A_T	a	t	36	-5.49	4.012e-08	-?
17_39965922_G_A	a	g	36	5.49	4.012e-08	+?
2_44223246_C_T	t	c	36	5.49	4.012e-08	+?
21_47558456_C_T	t	c	36	5.49	4.012e-08	+?
5_122751843_A_C	a	c	36	-5.49	4.012e-08	-?
10_103291259_CTGAGGTCAGGAGTT_C	ctgaggtcaggagtt	c	36	-5.49	4.012e-08	-?
6_149691103_G_C	c	g	36	5.49	4.012e-08	+?
19_56413233_G_T	t	g	36	5.49	4.012e-08	+?
1_240370967_CA_C	ca	c	36	-5.49	4.012e-08	-?
1_196797186_T_C	t	c	36	-5.49	4.012e-08	-?
1_70304018_A_C	a	c	36	-5.49	4.012e-08	-?
19_14740720_TAGAG_T	t	tagag	36	5.49	4.012e-08	+?
17_18006875_C_T	t	c	36	5.49	4.012e-08	+?
4_39128316_A_G	a	g	36	-5.49	4.012e-08	-?
3_14706570_G_A	a	g	36	5.49	4.012e-08	+?
11_67198855_A_G	a	g	36	-5.49	4.012e-08	-?
19_51022073_G_A	a	g	36	5.49	4.012e-08	+?
1_193045734_C_A	a	c	36	5.49	4.012e-08	+?
12_21427586_T_C	t	c	36	-5.49	4.012e-08	-?
17_62750241_A_G	a	g	36	-5.49	4.012e-08	-?
16_23634521_CTTTT_C	ctttt	c	36	-5.49	4.012e-08	-?
6_57433450_C_T	t	c	36	5.49	4.012e-08	+?
7_145692060_C_T	t	c	36	5.49	4.012e-08	+?
10_96828244_C_G	c	g	36	-5.49	4.012e-08	-?
9_108223687_AATG_A	a	aatg	36	5.49	4.012e-08	+?
2_178528764_A_AT	a	at	36	-5.49	4.012e-08	-?
12_50291451_T_A	a	t	36	5.49	4.012e-08	+?
1_203819098_G_A	a	g	36	5.49	4.012e-08	+?
15_33194233_T_C	t	c	36	-5.49	4.012e-08	-?
10_81608354_C_T	t	c	36	5.49	4.012e-08	+?
12_99639918_C_A	a	c	36	5.49	4.012e-08	+?
9_117092899_C_A	a	c	36	5.49	4.012e-08	+?
8_110346613_C_T	t	c	36	5.49	4.012e-08	+?
6_46630282_G_A	a	g	36	5.49	4.012e-08	+?
15_42740235_G_A	a	g	36	5.49	4.012e-08	+?
12_56684912_T_C	t	c	36	-5.49	4.012e-08	-?
5_66350142_C_T	t	c	36	5.49	4.012e-08	+?
12_6860128_C_T	t	c	36	5.49	4.012e-08	+?
22_29754448_T_C	t	c	36	-5.49	4.012e-08	-?
21_38639451_A_T	a	t	36	-5.49	4.012e-08	-?
2_149799027_A_G	a	g	36	-5.49	4.012e-08	-?
2_25376564_CGT_C	cgt	c	36	-5.49	4.012e-08	-?
5_32074573_G_A	a	g	36	5.49	4.012e-08	+?
19_20807063_C_G	c	g	36	-5.49	4.012e-08	-?
2_106987501_C_T	t	c	36	5.49	4.012e-08	+?
3_52437356_A_C	a	c	36	-5.49	4.012e-08	-?
19_42729843_A_C	a	c	36	-5.49	4.012e-08	-?
9_43625498_C_A	a	c	36	5.49	4.012e-08	+?
1_172560354_A_G	a	g	36	-5.49	4.012e-08	-?
3_184104738_G_A	a	g	36	5.49	4.012e-08	+?
10_74660199_C_T	t	c	36	5.49	4.012e-08	+?
18_33750236_G_A	a	g	36	5.49	4.012e-08	+?
1_202399727_G_C	c	g	36	5.49	4.012e-08	+?
9_94495581_C_T	t	c	36	5.49	4.012e-08	+?
11_6584554_T_G	t	g	36	-5.49	4.012e-08	-?
X_7811974_A_G	a	g	36	-5.49	4.012e-08	-?
1_146673178_A_G	a	g	36	5.49	4.012e-08	+?
6_160576969_G_A	a	g	36	5.49	4.012e-08	+?
1_152081247_C_T	t	c	36	5.49	4.012e-08	+?
6_39835372_G_A	a	g	36	5.49	4.012e-08	+?
16_83932955_C_T	t	c	36	5.49	4.012e-08	+?
19_12089141_C_T	t	c	36	5.49	4.012e-08	+?
20_3843015_G_A	a	g	36	5.49	4.012e-08	+?
9_66457161_A_G	a	g	36	5.49	4.012e-08	+?
11_65661709_G_A	a	g	36	5.49	4.012e-08	+?
1_22852542_G_A	a	g	36	5.49	4.012e-08	+?
1_12998566_C_T	t	c	36	5.49	4.012e-08	+?
5_76028758_T_C	t	c	36	-5.49	4.012e-08	-?
22_22730635_C_T	t	c	36	5.49	4.012e-08	+?
19_43690567_G_A	a	g	36	5.49	4.012e-08	+?
12_95478204_T_G	t	g	36	-5.49	4.012e-08	-?
2_116283581_C_T	t	c	36	5.49	4.012e-08	+?
4_13603591_C_T	t	c	36	5.49	4.012e-08	+?
7_140045461_A_G	a	g	36	-5.49	4.012e-08	-?
11_119547973_G_A	a	g	36	5.49	4.012e-08	+?
1_75622887_G_C	c	g	36	5.49	4.012e-08	+?
X_54972154_CGT_C	cgt	c	36	-5.49	4.012e-08	-?
17_1580774_T_C	t	c	36	-5.49	4.012e-08	-?
9_33443592_C_A	a	c	36	5.49	4.012e-08	+?
21_30933988_C_T	t	c	36	5.49	4.012e-08	+?
7_18624892_C_T	t	c	36	5.49	4.012e-08	+?
15_72543144_G_C	c	g	36	5.49	4.012e-08	+?
9_139686638_G_A	a	g	36	5.49	4.012e-08	+?
2_128747490_C_T	t	c	36	5.49	4.012e-08	+?
15_102299497_G_T	t	g	36	5.49	4.012e-08	+?
X_155257669_G_C	c	g	36	5.49	4.012e-08	+?
19_10415795_A_C	a	c	36	-5.49	4.012e-08	-?
5_82135848_G_A	a	g	36	5.49	4.012e-08	+?
2_190671255_C_T	t	c	36	5.49	4.012e-08	+?
5_1258958_G_A	a	g	36	5.49	4.012e-08	+?
19_3110250_C_T	t	c	36	5.49	4.012e-08	+?
17_62796320_G_A	a	g	36	5.49	4.012e-08	+?
10_118443263_G_T	t	g	36	5.49	4.012e-08	+?
6_57185458_A_G	a	g	36	-5.49	4.012e-08	-?
11_111612926_T_C	t	c	36	-5.49	4.012e-08	-?
9_131873663_C_A	a	c	36	5.49	4.012e-08	+?
21_46935209_T_C	t	c	36	-5.49	4.012e-08	-?
10_127524761_C_T	t	c	36	5.49	4.012e-08	+?
19_45349841_C_CGCT	cgct	c	36	5.49	4.012e-08	+?
16_21781515_G_A	a	g	36	5.49	4.012e-08	+?
19_12865650_G_A	a	g	36	5.49	4.012e-08	+?
19_14161333_A_AG	a	ag	36	-5.49	4.012e-08	-?
3_170784224_G_T	t	g	36	5.49	4.012e-08	+?
12_56491640_A_T	a	t	36	-5.49	4.012e-08	-?
19_50981442_G_A	a	g	36	5.49	4.012e-08	+?
16_66575895_G_A	a	g	36	5.49	4.012e-08	+?
14_59954461_T_C	t	c	36	-5.49	4.012e-08	-?
12_48879842_T_C	t	c	36	-5.49	4.012e-08	-?
19_24063193_AGAG_A	a	agag	36	5.49	4.012e-08	+?
9_140865971_C_T	t	c	36	5.49	4.012e-08	+?
15_74631994_T_C	t	c	36	-5.49	4.012e-08	-?
5_57913924_A_G	a	g	36	-5.49	4.012e-08	-?
2_174086201_CGAT_C	cgat	c	36	-5.49	4.012e-08	-?
1_216465427_A_C	a	c	36	-5.49	4.012e-08	-?
19_46283581_C_T	t	c	36	5.49	4.012e-08	+?
5_147475388_C_T	t	c	36	5.49	4.012e-08	+?
7_124537395_T_C	t	c	36	-5.49	4.012e-08	-?
4_151500273_T_C	t	c	36	-5.49	4.012e-08	-?
17_78336789_C_T	t	c	36	5.49	4.012e-08	+?
17_80044307_G_C	c	g	36	5.49	4.012e-08	+?
14_22204719_A_G	a	g	36	-5.49	4.012e-08	-?
3_53219611_C_T	t	c	36	5.49	4.012e-08	+?
3_142257306_T_C	t	c	36	-5.49	4.012e-08	-?
2_32860257_T_C	t	c	36	-5.49	4.012e-08	-?
19_56160687_G_T	t	g	36	5.49	4.012e-08	+?
15_90902277_G_T	t	g	36	5.49	4.012e-08	+?
17_39881327_T_C	t	c	36	-5.49	4.012e-08	-?
12_130647856_G_A	a	g	36	5.49	4.012e-08	+?
5_76012293_C_G	c	g	36	-5.49	4.012e-08	-?
17_1578765_T_C	t	c	36	-5.49	4.012e-08	-?
6_146242610_T_C	t	c	36	-5.49	4.012e-08	-?
13_114113737_GA_G	g	ga	36	5.49	4.012e-08	+?
10_90365548_C_G	c	g	36	-5.49	4.012e-08	-?
19_50285372_G_A	a	g	36	5.49	4.012e-08	+?
17_7814022_A_G	a	g	36	-5.49	4.012e-08	-?
16_58709826_G_GT	g	gt	36	-5.49	4.012e-08	-?
3_62358566_C_A	a	c	36	5.49	4.012e-08	+?
1_19981523_C_T	t	c	36	5.49	4.012e-08	+?
3_142297559_AGGCACTAGTCAACCACGCCAACGCGGGTTCCCG_A	a	aggcactagtcaaccacgccaacgcgggttcccg	36	5.49	4.012e-08	+?
10_8050917_G_T	t	g	36	5.49	4.012e-08	+?
8_145149848_G_A	a	g	36	5.49	4.012e-08	+?
15_49935532_G_T	t	g	36	5.49	4.012e-08	+?
2_170557667_A_C	a	c	36	-5.49	4.012e-08	-?
6_53784293_C_A	a	c	36	5.49	4.012e-08	+?
16_46711345_C_T	t	c	36	5.49	4.012e-08	+?
17_61886902_A_G	a	g	36	-5.49	4.012e-08	-?
1_157488435_G_A	a	g	36	5.49	4.012e-08	+?
17_43192697_A_C	a	c	36	-5.49	4.012e-08	-?
10_131757156_C_G	c	g	36	-5.49	4.012e-08	-?
1_206731119_C_T	t	c	36	5.49	4.012e-08	+?
17_18315401_T_G	t	g	36	-5.49	4.012e-08	-?
16_74419205_T_A	a	t	36	5.49	4.012e-08	+?
3_38627174_C_A	a	c	36	5.49	4.012e-08	+?
8_145700381_C_G	c	g	36	-5.49	4.012e-08	-?
11_119549425_C_T	t	c	36	5.49	4.012e-08	+?
3_142402915_C_T	t	c	36	5.49	4.012e-08	+?
9_34251304_G_GT	g	gt	36	-5.49	4.012e-08	-?
12_120594809_G_A	a	g	36	5.49	4.012e-08	+?
8_144941198_T_G	t	g	36	-5.49	4.012e-08	-?
2_241451471_G_A	a	g	36	5.49	4.012e-08	+?
18_77221452_G_GA	g	ga	36	-5.49	4.012e-08	-?
15_69341294_C_T	t	c	36	5.49	4.012e-08	+?
15_73659795_G_A	a	g	36	5.49	4.012e-08	+?
11_67191572_C_T	t	c	36	5.49	4.012e-08	+?
9_139297209_G_A	a	g	36	5.49	4.012e-08	+?
18_34409120_C_T	t	c	36	5.49	4.012e-08	+?
7_156956445_A_G	a	g	36	-5.49	4.012e-08	-?
21_43187085_C_T	t	c	36	5.49	4.012e-08	+?
6_130105306_A_G	a	g	36	-5.49	4.012e-08	-?
17_38798610_A_T	a	t	36	-5.49	4.012e-08	-?
5_149921099_G_A	a	g	36	5.49	4.012e-08	+?
2_74135628_G_A	a	g	36	5.49	4.012e-08	+?
3_30686232_T_C	t	c	36	-5.49	4.012e-08	-?
22_21351306_A_G	a	g	36	-5.49	4.012e-08	-?
11_64846455_G_C	c	g	36	5.49	4.012e-08	+?
11_78380090_C_T	t	c	36	5.49	4.012e-08	+?
2_68740430_G_T	t	g	36	5.49	4.012e-08	+?
6_167238313_CTG_C	ctg	c	36	-5.49	4.012e-08	-?
15_41730471_T_A	a	t	36	5.49	4.012e-08	+?
3_108158440_G_T	t	g	36	5.49	4.012e-08	+?
3_38357776_C_T	t	c	36	5.49	4.012e-08	+?
13_46850941_C_T	t	c	36	5.49	4.012e-08	+?
12_32994100_T_C	t	c	36	-5.49	4.012e-08	-?
19_3532183_G_A	a	g	36	5.49	4.012e-08	+?
5_82940204_G_A	a	g	36	5.49	4.012e-08	+?
12_50367486_C_G	c	g	36	-5.49	4.012e-08	-?
15_72252206_ATG_A	a	atg	36	5.49	4.012e-08	+?
22_21989578_A_G	a	g	36	-5.49	4.012e-08	-?
2_905736_A_T	a	t	36	-5.49	4.012e-08	-?
5_137902989_C_A	a	c	36	5.49	4.012e-08	+?
16_67854572_G_A	a	g	36	5.49	4.012e-08	+?
6_11192510_C_A	a	c	36	5.49	4.012e-08	+?
9_21368039_A_C	a	c	36	-5.49	4.012e-08	-?
14_92549599_T_A	a	t	36	5.49	4.012e-08	+?
2_228228462_T_G	t	g	36	-5.49	4.012e-08	-?
16_71957320_G_A	a	g	36	5.49	4.012e-08	+?
5_36180055_C_T	t	c	36	5.49	4.012e-08	+?
1_154199618_C_G	c	g	36	-5.49	4.012e-08	-?
2_27717575_A_C	a	c	36	-5.49	4.012e-08	-?
4_26483659_G_A	a	g	36	5.49	4.012e-08	+?
2_160879360_C_T	t	c	36	5.49	4.012e-08	+?
2_36781326_C_T	t	c	36	5.49	4.012e-08	+?
2_26688572_G_A	a	g	36	5.49	4.012e-08	+?
3_183911280_G_A	a	g	36	5.49	4.012e-08	+?
1_207782608_G_A	a	g	36	5.49	4.012e-08	+?
X_146341311_C_A	a	c	36	5.49	4.012e-08	+?
6_7586120_T_A	a	t	36	5.49	4.012e-08	+?
5_132272965_C_A	a	c	36	5.49	4.012e-08	+?
9_136082450_C_G	c	g	36	-5.49	4.012e-08	-?
17_7012080_G_A	a	g	36	5.49	4.012e-08	+?
17_4060398_AAC_A	a	aac	36	5.49	4.012e-08	+?
5_87968858_G_C	c	g	36	5.49	4.012e-08	+?
X_10035520_G_A	a	g	36	5.49	4.012e-08	+?
10_90350956_A_G	a	g	36	-5.49	4.012e-08	-?
19_39057692_C_T	t	c	36	5.49	4.012e-08	+?
3_47449516_G_T	t	g	36	5.49	4.012e-08	+?
4_183370296_T_G	t	g	36	-5.49	4.012e-08	-?
5_80504348_A_C	a	c	36	-5.49	4.012e-08	-?
7_131071908_T_G	t	g	36	-5.49	4.012e-08	-?
16_84012137_G_C	c	g	36	5.49	4.012e-08	+?
8_23386571_G_C	c	g	36	5.49	4.012e-08	+?
7_150763630_AGGCGGT_A	a	aggcggt	36	5.49	4.012e-08	+?
16_724030_C_T	t	c	36	5.49	4.012e-08	+?
9_140927347_A_G	a	g	36	-5.49	4.012e-08	-?
19_49642908_G_A	a	g	36	5.49	4.012e-08	+?
5_115420634_C_G	c	g	36	-5.49	4.012e-08	-?
19_12937316_T_G	t	g	36	-5.49	4.012e-08	-?
10_82273740_G_A	a	g	36	5.49	4.012e-08	+?
21_43815980_C_G	c	g	36	-5.49	4.012e-08	-?
5_161524900_G_A	a	g	36	5.49	4.012e-08	+?
13_101833650_G_A	a	g	36	5.49	4.012e-08	+?
1_97187243_G_C	c	g	36	5.49	4.012e-08	+?
12_110230071_G_A	a	g	36	5.49	4.012e-08	+?
17_17924223_C_T	t	c	36	5.49	4.012e-08	+?
21_46330430_C_G	c	g	36	-5.49	4.012e-08	-?
3_141635432_A_G	a	g	36	-5.49	4.012e-08	-?
10_127677453_A_T	a	t	36	-5.49	4.012e-08	-?
18_29848802_T_C	t	c	36	-5.49	4.012e-08	-?
1_3649488_G_A	a	g	36	5.49	4.012e-08	+?
20_15967294_C_T	t	c	36	5.49	4.012e-08	+?
7_4153538_C_A	a	c	36	5.49	4.012e-08	+?
4_108935600_T_G	t	g	36	-5.49	4.012e-08	-?
1_201054863_G_A	a	g	36	5.49	4.012e-08	+?
19_3585931_T_C	t	c	36	-5.49	4.012e-08	-?
9_100887203_C_T	t	c	36	5.49	4.012e-08	+?
7_6472291_A_T	a	t	36	-5.49	4.012e-08	-?
19_17010384_G_T	t	g	36	5.49	4.012e-08	+?
17_38097625_G_A	a	g	36	5.49	4.012e-08	+?
14_52383376_C_T	t	c	36	5.49	4.012e-08	+?
1_45965212_G_A	a	g	36	5.49	4.012e-08	+?
16_21415894_C_T	t	c	36	5.49	4.012e-08	+?
2_47607186_T_C	t	c	36	-5.49	4.012e-08	-?
6_42934682_T_C	t	c	36	-5.49	4.012e-08	-?
3_148901395_TA_T	t	ta	36	5.49	4.012e-08	+?
14_64879350_G_GT	g	gt	36	-5.49	4.012e-08	-?
11_74641548_A_T	a	t	36	-5.49	4.012e-08	-?
6_55381191_A_C	a	c	36	-5.49	4.012e-08	-?
21_44438183_AGAATGGTTT_A	a	agaatggttt	36	5.49	4.012e-08	+?
6_112528525_G_T	t	g	36	5.49	4.012e-08	+?
1_248263584_G_C	c	g	36	5.49	4.012e-08	+?
11_63536002_C_T	t	c	36	5.49	4.012e-08	+?
12_51585629_G_A	a	g	36	5.49	4.012e-08	+?
17_4167449_C_T	t	c	36	5.49	4.012e-08	+?
8_68864708_G_C	c	g	36	5.49	4.012e-08	+?
5_70201006_T_C	t	c	36	-5.49	4.012e-08	-?
1_6185608_G_A	a	g	36	5.49	4.012e-08	+?
18_56586686_A_G	a	g	36	-5.49	4.012e-08	-?
4_103537855_G_A	a	g	36	5.49	4.012e-08	+?
1_17594456_C_T	t	c	36	5.49	4.012e-08	+?
10_98079079_G_C	c	g	36	5.49	4.012e-08	+?
22_26867458_C_T	t	c	36	5.49	4.012e-08	+?
13_113978905_C_CAGTT	cagtt	c	36	5.49	4.012e-08	+?
4_21698967_C_A	a	c	36	5.49	4.012e-08	+?
8_6390076_G_T	t	g	36	5.49	4.012e-08	+?
9_136212168_G_A	a	g	36	5.49	4.012e-08	+?
12_113533024_G_A	a	g	36	5.49	4.012e-08	+?
14_64593207_T_C	t	c	36	-5.49	4.012e-08	-?
9_139818120_G_A	a	g	36	5.49	4.012e-08	+?
9_136404804_G_GGCTGTCCCGGCTGTCCCC	g	ggctgtcccggctgtcccc	36	-5.49	4.012e-08	-?
11_615499_TGAGGGCTTGTAG_T	t	tgagggcttgtag	36	5.49	4.012e-08	+?
10_124096083_C_T	t	c	36	5.49	4.012e-08	+?
14_64726847_G_A	a	g	36	5.49	4.012e-08	+?
5_126171971_T_C	t	c	36	-5.49	4.012e-08	-?
20_31381507_T_G	t	g	36	-5.49	4.012e-08	-?
19_39096800_C_G	c	g	36	-5.49	4.012e-08	-?
19_33584545_G_GTT	g	gtt	36	-5.49	4.012e-08	-?
2_128415213_G_A	a	g	36	5.49	4.012e-08	+?
19_8642378_T_G	t	g	36	-5.49	4.012e-08	-?
1_104163350_T_A	a	t	36	5.49	4.012e-08	+?
12_41966299_C_A	a	c	36	5.49	4.012e-08	+?
16_904473_G_A	a	g	36	5.49	4.012e-08	+?
19_54972727_C_T	t	c	36	5.49	4.012e-08	+?
5_160018244_C_T	t	c	36	5.49	4.012e-08	+?
6_139144722_G_C	c	g	36	5.49	4.012e-08	+?
12_3728529_C_T	t	c	36	5.49	4.012e-08	+?
7_128506650_T_C	t	c	36	-5.49	4.012e-08	-?
7_21882095_A_G	a	g	36	-5.49	4.012e-08	-?
12_50304574_G_A	a	g	36	5.49	4.012e-08	+?
2_137988955_C_T	t	c	36	5.49	4.012e-08	+?
11_69468187_GTT_G	g	gtt	36	5.49	4.012e-08	+?
19_812548_G_C	c	g	36	5.49	4.012e-08	+?
7_138946363_C_T	t	c	36	5.49	4.012e-08	+?
4_186568023_C_T	t	c	36	5.49	4.012e-08	+?
6_97246471_A_G	a	g	36	-5.49	4.012e-08	-?
18_56585945_G_A	a	g	36	5.49	4.012e-08	+?
2_71043457_C_A	a	c	36	5.49	4.012e-08	+?
11_33620575_ACT_A	a	act	36	5.49	4.012e-08	+?
19_39908385_C_T	t	c	36	5.49	4.012e-08	+?
1_146055552_C_A	a	c	36	5.49	4.012e-08	+?
17_36104957_C_A	a	c	36	5.49	4.012e-08	+?
22_23495247_C_G	c	g	36	-5.49	4.012e-08	-?
10_127524905_A_T	a	t	36	-5.49	4.012e-08	-?
2_239057718_C_T	t	c	36	5.49	4.012e-08	+?
3_121304757_G_T	t	g	36	5.49	4.012e-08	+?
4_5500714_C_G	c	g	36	-5.49	4.012e-08	-?
4_8082607_C_T	t	c	36	5.49	4.012e-08	+?
9_134090532_G_A	a	g	36	5.49	4.012e-08	+?
11_76727917_T_C	t	c	36	-5.49	4.012e-08	-?
12_76806217_A_T	a	t	36	-5.49	4.012e-08	-?
9_33057886_G_A	a	g	36	5.49	4.012e-08	+?
8_110487524_T_C	t	c	36	-5.49	4.012e-08	-?
15_28463585_G_A	a	g	36	5.49	4.012e-08	+?
4_106406528_C_T	t	c	36	5.49	4.012e-08	+?
12_71509655_T_C	t	c	36	-5.49	4.012e-08	-?
12_41961727_C_T	t	c	36	5.49	4.012e-08	+?
1_11782697_G_A	a	g	36	5.49	4.012e-08	+?
6_152674825_T_G	t	g	36	-5.49	4.012e-08	-?
22_32110129_T_A	a	t	36	5.49	4.012e-08	+?
2_179476242_C_T	t	c	36	5.49	4.012e-08	+?
1_173819446_G_A	a	g	36	5.49	4.012e-08	+?
6_32066235_TTTG_T	t	tttg	36	5.49	4.012e-08	+?
17_58153635_T_C	t	c	36	-5.49	4.012e-08	-?
2_29354079_T_C	t	c	36	-5.49	4.012e-08	-?
1_11167158_C_T	t	c	36	5.49	4.012e-08	+?
17_7754460_C_A	a	c	36	5.49	4.012e-08	+?
14_64629174_C_T	t	c	36	5.49	4.012e-08	+?
3_52391530_G_A	a	g	36	5.49	4.012e-08	+?
1_145039493_G_T	t	g	36	5.49	4.012e-08	+?
3_15292369_A_G	a	g	36	-5.49	4.012e-08	-?
9_36227195_A_G	a	g	36	-5.49	4.012e-08	-?
10_103903949_G_C	c	g	36	5.49	4.012e-08	+?
5_36180059_A_T	a	t	36	-5.49	4.012e-08	-?
4_100571887_C_T	t	c	36	5.49	4.012e-08	+?
17_3967646_C_T	t	c	36	5.49	4.012e-08	+?
14_102450164_G_A	a	g	36	5.49	4.012e-08	+?
17_26715779_C_T	t	c	36	5.49	4.012e-08	+?
7_34874151_G_A	a	g	36	5.49	4.012e-08	+?
14_60866533_T_C	t	c	36	-5.49	4.012e-08	-?
19_15770253_G_A	a	g	36	5.49	4.012e-08	+?
20_33764191_C_T	t	c	36	5.49	4.012e-08	+?
7_141755462_G_C	c	g	36	5.49	4.012e-08	+?
10_127555537_G_A	a	g	36	5.49	4.012e-08	+?
3_47823347_C_T	t	c	36	5.49	4.012e-08	+?
17_6979622_C_T	t	c	36	5.49	4.012e-08	+?
12_52100176_C_G	c	g	36	-5.49	4.012e-08	-?
10_486777_T_C	t	c	36	-5.49	4.012e-08	-?
22_41252599_G_C	c	g	36	5.49	4.012e-08	+?
11_92615764_CAA_C	caa	c	36	-5.49	4.012e-08	-?
12_29648265_A_G	a	g	36	-5.49	4.012e-08	-?
16_16460011_G_T	t	g	36	5.49	4.012e-08	+?
2_29226389_A_G	a	g	36	-5.49	4.012e-08	-?
1_203148918_A_G	a	g	36	-5.49	4.012e-08	-?
22_39064171_A_G	a	g	36	-5.49	4.012e-08	-?
12_52772237_A_G	a	g	36	-5.49	4.012e-08	-?
3_4693967_G_A	a	g	36	5.49	4.012e-08	+?
16_1824297_TTGC_T	t	ttgc	36	5.49	4.012e-08	+?
5_138117498_T_A	a	t	36	5.49	4.012e-08	+?
4_10444986_A_G	a	g	36	-5.49	4.012e-08	-?
22_22898224_T_C	t	c	36	-5.49	4.012e-08	-?
3_169550822_G_A	a	g	36	5.49	4.012e-08	+?
4_76897191_C_T	t	c	36	5.49	4.012e-08	+?
1_109856877_C_G	c	g	36	-5.49	4.012e-08	-?
1_32660265_GC_G	g	gc	36	5.49	4.012e-08	+?
12_122246091_C_T	t	c	36	5.49	4.012e-08	+?
9_36594881_T_C	t	c	36	-5.49	4.012e-08	-?
15_20476981_G_T	t	g	36	5.49	4.012e-08	+?
7_49951764_G_C	c	g	36	5.49	4.012e-08	+?
19_40405898_G_GTCCCA	g	gtccca	36	-5.49	4.012e-08	-?
11_43904383_C_T	t	c	36	5.49	4.012e-08	+?
13_50467083_GTC_G	g	gtc	36	5.49	4.012e-08	+?
11_3727504_C_A	a	c	36	5.49	4.012e-08	+?
5_79286419_C_T	t	c	36	5.49	4.012e-08	+?
17_72248633_G_A	a	g	36	5.49	4.012e-08	+?
X_133955298_C_T	t	c	36	5.49	4.012e-08	+?
12_53433090_G_A	a	g	36	5.49	4.012e-08	+?
19_16643951_C_T	t	c	36	5.49	4.012e-08	+?
19_3939823_T_A	a	t	36	5.49	4.012e-08	+?
15_74890391_A_G	a	g	36	-5.49	4.012e-08	-?
9_127214621_C_A	a	c	36	5.49	4.012e-08	+?
2_166237768_G_A	a	g	36	5.49	4.012e-08	+?
19_10829163_G_A	a	g	36	5.49	4.012e-08	+?
6_75858278_T_C	t	c	36	-5.49	4.012e-08	-?
12_13136488_C_T	t	c	36	5.49	4.012e-08	+?
11_62638215_A_T	a	t	36	-5.49	4.012e-08	-?
14_77102050_C_G	c	g	36	-5.49	4.012e-08	-?
10_82329764_C_G	c	g	36	-5.49	4.012e-08	-?
19_4472452_G_GT	g	gt	36	-5.49	4.012e-08	-?
17_35995760_T_C	t	c	36	-5.49	4.012e-08	-?
14_22978406_C_T	t	c	36	5.49	4.012e-08	+?
19_549041_C_T	t	c	36	5.49	4.012e-08	+?
3_194338399_G_A	a	g	36	5.49	4.012e-08	+?
3_193360769_A_G	a	g	36	-5.49	4.012e-08	-?
3_4887686_A_T	a	t	36	-5.49	4.012e-08	-?
10_90428573_C_T	t	c	36	5.49	4.012e-08	+?
7_42005007_G_A	a	g	36	5.49	4.012e-08	+?
2_11945084_A_G	a	g	36	-5.49	4.012e-08	-?
2_202593085_T_C	t	c	36	-5.49	4.012e-08	-?
1_10068428_G_A	a	g	36	5.49	4.012e-08	+?
3_124629143_G_T	t	g	36	5.49	4.012e-08	+?
19_50310277_T_C	t	c	36	-5.49	4.012e-08	-?
6_96988676_A_G	a	g	36	-5.49	4.012e-08	-?
12_120941444_T_C	t	c	36	-5.49	4.012e-08	-?
8_64087840_C_T	t	c	36	5.49	4.012e-08	+?
4_89079583_G_C	c	g	36	5.49	4.012e-08	+?
10_49654446_C_T	t	c	36	5.49	4.012e-08	+?
1_67313091_T_TC	t	tc	36	-5.49	4.012e-08	-?
9_137801589_G_A	a	g	36	5.49	4.012e-08	+?
4_41622652_A_G	a	g	36	-5.49	4.012e-08	-?
12_105546232_A_G	a	g	36	-5.49	4.012e-08	-?
7_44073730_G_C	c	g	36	5.49	4.012e-08	+?
6_391711_A_C	a	c	36	-5.49	4.012e-08	-?
3_52507794_G_A	a	g	36	5.49	4.012e-08	+?
19_17838021_A_C	a	c	36	-5.49	4.012e-08	-?
16_33784618_T_G	t	g	36	-5.49	4.012e-08	-?
2_95537886_G_A	a	g	36	5.49	4.012e-08	+?
20_59431599_CA_C	ca	c	36	-5.49	4.012e-08	-?
17_36971022_C_A	a	c	36	5.49	4.012e-08	+?
12_56154228_GTAAA_G	g	gtaaa	36	5.49	4.012e-08	+?
19_50882562_A_G	a	g	36	-5.49	4.012e-08	-?
12_107002573_A_T	a	t	36	-5.49	4.012e-08	-?
12_42604112_TG_T	t	tg	36	5.49	4.012e-08	+?
16_74334076_A_G	a	g	36	-5.49	4.012e-08	-?
9_35057110_C_A	a	c	36	5.49	4.012e-08	+?
15_23572465_G_A	a	g	36	5.49	4.012e-08	+?
11_121032819_C_T	t	c	36	5.49	4.012e-08	+?
6_25665245_C_T	t	c	36	5.49	4.012e-08	+?
9_156351_A_G	a	g	36	-5.49	4.012e-08	-?
3_188478229_C_T	t	c	36	5.49	4.012e-08	+?
1_29586595_C_T	t	c	36	5.49	4.012e-08	+?
3_97516927_A_G	a	g	36	-5.49	4.012e-08	-?
8_48614645_TCTCTCTCTCTCTCTTACACACACA_TCA	tca	tctctctctctctcttacacacaca	36	5.49	4.012e-08	+?
2_241905379_C_G	c	g	36	-5.49	4.012e-08	-?
15_23572462_C_T	t	c	36	5.49	4.012e-08	+?
9_66457345_G_GCTCC	g	gctcc	36	-5.49	4.012e-08	-?
19_5696646_C_CGGGTCAGGGTTGCCTGGGGCTCT	cgggtcagggttgcctggggctct	c	36	5.49	4.012e-08	+?
17_72428151_A_T	a	t	36	-5.49	4.012e-08	-?
4_15724443_G_T	t	g	36	5.49	4.012e-08	+?
6_117704632_C_A	a	c	36	5.49	4.012e-08	+?
6_13283497_A_C	a	c	36	-5.49	4.012e-08	-?
9_107579818_T_C	t	c	36	-5.49	4.012e-08	-?
7_94940880_A_C	a	c	36	-5.49	4.012e-08	-?
22_32843089_A_T	a	t	36	-5.49	4.012e-08	-?
20_23970146_G_A	a	g	36	5.49	4.012e-08	+?
2_26695192_C_T	t	c	36	5.49	4.012e-08	+?
3_158983289_C_T	t	c	36	5.49	4.012e-08	+?
2_139045457_A_AAAAAAAAG	a	aaaaaaaag	36	-5.49	4.012e-08	-?
4_36168602_C_T	t	c	36	5.49	4.012e-08	+?
16_3024227_G_A	a	g	36	5.49	4.012e-08	+?
19_1797236_A_G	a	g	36	-5.49	4.012e-08	-?
6_96053566_G_C	c	g	36	5.49	4.012e-08	+?
7_30492202_G_A	a	g	36	5.49	4.012e-08	+?
5_43040314_G_A	a	g	36	5.49	4.012e-08	+?
14_75127918_A_C	a	c	36	-5.49	4.012e-08	-?
11_123431442_G_A	a	g	36	5.49	4.012e-08	+?
18_55352207_C_T	t	c	36	5.49	4.012e-08	+?
22_50278810_T_C	t	c	36	-5.49	4.012e-08	-?
3_119210426_G_A	a	g	36	5.49	4.012e-08	+?
5_41842896_G_A	a	g	36	5.49	4.012e-08	+?
22_24180863_C_G	c	g	36	-5.49	4.012e-08	-?
4_81866111_CTTAG_C	cttag	c	36	-5.49	4.012e-08	-?
6_143771882_G_A	a	g	36	5.49	4.012e-08	+?
4_2826288_G_T	t	g	36	5.49	4.012e-08	+?
X_2836442_A_AGACGGAGTGTCGC	a	agacggagtgtcgc	36	-5.49	4.012e-08	-?
19_16006266_G_T	t	g	36	5.49	4.012e-08	+?
17_1373068_C_T	t	c	36	5.49	4.012e-08	+?
3_184071136_G_A	a	g	36	5.49	4.012e-08	+?
2_186659402_C_T	t	c	36	5.49	4.012e-08	+?
15_22854972_A_G	a	g	36	-5.49	4.012e-08	-?
15_84911303_C_T	t	c	36	5.49	4.012e-08	+?
12_46758143_CTTT_C	cttt	c	36	-5.49	4.012e-08	-?
2_170048482_C_T	t	c	36	5.49	4.012e-08	+?
3_49689588_C_T	t	c	36	5.49	4.012e-08	+?
3_29922461_C_T	t	c	36	5.49	4.012e-08	+?
1_224621318_T_C	t	c	36	-5.49	4.012e-08	-?
12_9660102_C_T	t	c	36	5.49	4.012e-08	+?
2_74890176_C_T	t	c	36	5.49	4.012e-08	+?
3_187388089_G_A	a	g	36	5.49	4.012e-08	+?
19_15769993_C_T	t	c	36	5.49	4.012e-08	+?
14_102516711_G_T	t	g	36	5.49	4.012e-08	+?
6_1313241_G_A	a	g	36	5.49	4.012e-08	+?
3_127439768_C_T	t	c	36	5.49	4.012e-08	+?
8_20003250_G_T	t	g	36	5.49	4.012e-08	+?
12_122751089_C_G	c	g	36	-5.49	4.012e-08	-?
13_45008147_T_C	t	c	36	-5.49	4.012e-08	-?
16_87416970_A_ACCCCCCCCCC	a	acccccccccc	36	-5.49	4.012e-08	-?
9_134394354_C_T	t	c	36	5.49	4.012e-08	+?
14_56110995_G_T	t	g	36	5.49	4.012e-08	+?
13_33629145_G_A	a	g	36	5.49	4.012e-08	+?
11_101918569_C_T	t	c	36	5.49	4.012e-08	+?
1_196757255_T_C	t	c	36	-5.49	4.012e-08	-?
16_10998557_G_A	a	g	36	5.49	4.012e-08	+?
8_144944225_C_T	t	c	36	5.49	4.012e-08	+?
9_38527628_C_T	t	c	36	5.49	4.012e-08	+?
12_312001_T_G	t	g	36	-5.49	4.012e-08	-?
6_106978190_C_T	t	c	36	5.49	4.012e-08	+?
4_164533318_G_A	a	g	36	5.49	4.012e-08	+?
17_73235123_G_A	a	g	36	5.49	4.012e-08	+?
11_3390148_C_A	a	c	36	5.49	4.012e-08	+?
17_81082496_TGTCAGAGTGCTGTGTGCCGGGCGACGCTCAGGGCAACCGTGCAGGCATCC_T	t	tgtcagagtgctgtgtgccgggcgacgctcagggcaaccgtgcaggcatcc	36	5.49	4.012e-08	+?
2_238244552_A_C	a	c	36	-5.49	4.012e-08	-?
4_77100807_T_C	t	c	36	-5.49	4.012e-08	-?
2_207911130_A_G	a	g	36	-5.49	4.012e-08	-?
10_43978671_C_CTTCTT	cttctt	c	36	5.49	4.012e-08	+?
15_91428794_G_T	t	g	36	5.49	4.012e-08	+?
16_20333960_C_T	t	c	36	5.49	4.012e-08	+?
19_5692192_C_T	t	c	36	5.49	4.012e-08	+?
1_79094593_A_G	a	g	36	5.49	4.012e-08	+?
19_5679259_G_C	c	g	36	5.49	4.012e-08	+?
1_202155370_CTTCCCA_C	cttccca	c	36	-5.49	4.012e-08	-?
8_139691926_G_A	a	g	36	5.49	4.012e-08	+?
22_20332023_C_T	t	c	36	5.49	4.012e-08	+?
15_43903242_G_GT	g	gt	36	-5.49	4.012e-08	-?
6_17284940_C_T	t	c	36	5.49	4.012e-08	+?
1_155916973_G_A	a	g	36	5.49	4.012e-08	+?
14_23103081_G_A	a	g	36	5.49	4.012e-08	+?
15_99434898_C_T	t	c	36	5.49	4.012e-08	+?
2_177495233_G_A	a	g	36	5.49	4.012e-08	+?
5_170883526_C_T	t	c	36	5.49	4.012e-08	+?
1_39796945_A_G	a	g	36	-5.49	4.012e-08	-?
5_148725027_G_C	c	g	36	5.49	4.012e-08	+?
3_184096161_G_T	t	g	36	5.49	4.012e-08	+?
7_47860800_T_C	t	c	36	-5.49	4.012e-08	-?
3_67459357_A_G	a	g	36	-5.49	4.012e-08	-?
10_32560526_T_C	t	c	36	-5.49	4.012e-08	-?
X_19688956_G_A	a	g	36	5.49	4.012e-08	+?
14_104429340_C_A	a	c	36	5.49	4.012e-08	+?
6_30856450_T_C	t	c	36	-5.49	4.012e-08	-?
16_53326730_C_T	t	c	36	5.49	4.012e-08	+?
1_26504184_G_A	a	g	36	5.49	4.012e-08	+?
2_28765918_G_T	t	g	36	5.49	4.012e-08	+?
1_39763362_C_G	c	g	36	-5.49	4.012e-08	-?
7_16837426_A_G	a	g	36	-5.49	4.012e-08	-?
2_207911028_AAGAAGAAGAAGAAGAAGAAGAAGAAGAAGGAGAAGGAGAAGGAGAAGG_AAGAAGG	aagaagaagaagaagaagaagaagaagaaggagaaggagaaggagaagg	aagaagg	36	-5.49	4.012e-08	-?
7_56140686_A_T	a	t	36	-5.49	4.012e-08	-?
6_161085130_G_T	t	g	36	5.49	4.012e-08	+?
9_36669341_A_G	a	g	36	-5.49	4.012e-08	-?
17_61996095_A_G	a	g	36	-5.49	4.012e-08	-?
19_12175673_A_C	a	c	36	-5.49	4.012e-08	-?
1_160854815_C_G	c	g	36	-5.49	4.012e-08	-?
15_42143424_C_T	t	c	36	5.49	4.012e-08	+?
21_43640324_A_C	a	c	36	-5.49	4.012e-08	-?
11_61069655_C_T	t	c	36	5.49	4.012e-08	+?
10_71700584_G_C	c	g	36	5.49	4.012e-08	+?
6_37523080_A_C	a	c	36	-5.49	4.012e-08	-?
1_93301670_G_T	t	g	36	5.49	4.012e-08	+?
17_7678716_C_T	t	c	36	5.49	4.012e-08	+?
8_144891093_G_A	a	g	36	5.49	4.012e-08	+?
7_73279794_T_A	a	t	36	5.49	4.012e-08	+?
17_76449563_G_A	a	g	36	5.49	4.012e-08	+?
2_9525609_G_A	a	g	36	5.49	4.012e-08	+?
3_194174631_G_A	a	g	36	5.49	4.012e-08	+?
6_38709720_A_G	a	g	36	-5.49	4.012e-08	-?
19_45852954_T_TGGGGTG	t	tggggtg	36	-5.49	4.012e-08	-?
7_23234560_GCCTC_G	g	gcctc	36	5.49	4.012e-08	+?
15_42681926_A_G	a	g	36	-5.49	4.012e-08	-?
4_30010467_T_C	t	c	36	-5.49	4.012e-08	-?
19_55488199_A_T	a	t	36	-5.49	4.012e-08	-?
5_10683822_T_C	t	c	36	-5.49	4.012e-08	-?
3_48506220_C_G	c	g	36	-5.49	4.012e-08	-?
12_9222486_T_G	t	g	36	-5.49	4.012e-08	-?
15_44166771_A_G	a	g	36	-5.49	4.012e-08	-?
14_53347681_C_T	t	c	36	5.49	4.012e-08	+?
1_168054180_G_A	a	g	36	5.49	4.012e-08	+?
10_127684088_G_GT	g	gt	36	-5.49	4.012e-08	-?
8_145066886_A_G	a	g	36	5.49	4.012e-08	+?
1_16350315_C_A	a	c	36	5.49	4.012e-08	+?
6_159206651_G_A	a	g	36	5.49	4.012e-08	+?
19_5705702_C_T	t	c	36	5.49	4.012e-08	+?
3_13384824_T_G	t	g	36	-5.49	4.012e-08	-?
2_160710934_G_A	a	g	36	5.49	4.012e-08	+?
16_14721885_A_C	a	c	36	-5.49	4.012e-08	-?
16_72821639_GCCA_G	g	gcca	36	5.49	4.012e-08	+?
19_57723278_G_A	a	g	36	5.49	4.012e-08	+?
1_103379977_G_A	a	g	36	5.49	4.012e-08	+?
12_110403392_C_T	t	c	36	5.49	4.012e-08	+?
3_13384836_T_G	t	g	36	-5.49	4.012e-08	-?
12_30848702_G_C	c	g	36	5.49	4.012e-08	+?
4_42588372_C_G	c	g	36	-5.49	4.012e-08	-?
5_154134889_G_T	t	g	36	5.49	4.012e-08	+?
20_43534620_T_C	t	c	36	-5.49	4.012e-08	-?
20_18377237_T_C	t	c	36	-5.49	4.012e-08	-?
17_27423924_G_T	t	g	36	5.49	4.012e-08	+?
2_74643215_C_T	t	c	36	5.49	4.012e-08	+?
10_90350905_A_G	a	g	36	-5.49	4.012e-08	-?
19_50957600_T_C	t	c	36	-5.49	4.012e-08	-?
11_69952046_C_T	t	c	36	5.49	4.012e-08	+?
11_133714474_C_T	t	c	36	5.49	4.012e-08	+?
7_154564672_G_T	t	g	36	5.49	4.012e-08	+?
5_1264587_G_A	a	g	36	5.49	4.012e-08	+?
10_113915612_C_T	t	c	36	5.49	4.012e-08	+?
11_17656589_G_C	c	g	36	5.49	4.012e-08	+?
X_152823357_G_A	a	g	36	5.49	4.012e-08	+?
19_51629587_C_A	a	c	36	5.49	4.012e-08	+?
2_220041654_C_G	c	g	36	-5.49	4.012e-08	-?
19_45997992_T_C	t	c	36	-5.49	4.012e-08	-?
11_6584184_G_A	a	g	36	5.49	4.012e-08	+?
21_47864580_TC_T	t	tc	36	5.49	4.012e-08	+?
1_186277681_A_G	a	g	36	-5.49	4.012e-08	-?
1_13910429_C_G	c	g	36	-5.49	4.012e-08	-?
7_27809509_C_G	c	g	36	-5.49	4.012e-08	-?
4_37445655_C_T	t	c	36	5.49	4.012e-08	+?
17_29119490_C_T	t	c	36	5.49	4.012e-08	+?
18_672778_G_T	t	g	36	5.49	4.012e-08	+?
15_40322551_TG_T	t	tg	36	5.49	4.012e-08	+?
20_56810289_T_C	t	c	36	-5.49	4.012e-08	-?
11_2192888_G_A	a	g	36	5.49	4.012e-08	+?
[truncated: 3,001 more rows]
